# Supplementary material for: Pluripotent stem cells escape from senescence-associated DNA methylation changes
Source: HighWire-hosted journal article supplement (doi:10.1101/gr.141945.112), 2012-10-18
Supplement: Supplemental_table_1.xlsx [file Supplemental_table_1.xlsx]

## Sheet: Tabelle1
			Beta values:
TargetID	UCSC_REFGENE_NAME	FORWARD_SEQUENCE	MSC donor2 P2	MSC donor4 P2	MSC donor5 P2	MSC donor6 P2	MSC donor11 P3	MSC donor2 P7	MSC donor4 P12	MSC donor5 P16	MSC donor6 P14	MSC donor11 P14 GFP	MSC donor4 P3 15Gy	MSC donor5 P3 15Gy	MSC donor6 P3 15Gy	MSC donor11 P3 15Gy	MSC donor11 P14 hTERT	iP-MSC donor2 cloneA	iP-MSC donor2 cloneB	iP-MSC donor4 cloneA	iP-MSC donor4 cloneB	iP-MSC donor5 cloneA	iP-MSC donor5 cloneB	ESC H1	ESC H9	ESC HES2
cg06823034	LTB4R	GGCGCGAGCGGGAACTACGGCCTTGGCCTTCTTCAGTTCTAGCGTCAACCCGGTGCTCTA[CG]TCTTCACCGCTGGAGATCTGCTGCCCCGGGCAGGTCCCCGTTTCCTCACGCGGCTCTTCG	0.425024	0.399961	0.422907	0.407457	0.409628	0.612586	0.61553	0.623993	0.603751	0.446823	0.392395	0.429878	0.415978	0.374169	0.597483	0.661709	0.61324	0.528941	0.518749	0.613267	0.553911	0.930032	0.929921	0.955709
cg19759135	LTC4S	GGCCGTCCTCTGAGCAGCAGACGGGGCTAAGCGTTCCCCAGCTCGCCTTCACACACAGCC[CG]TGCCACCACACCGACGGTACCATGAAGGACGAGGTAGCTCTACTGGCTGCTGTCACCCTC	0.201979	0.210265	0.165527	0.188672	0.196744	0.39909	0.44052	0.550385	0.536728	0.302712	0.193583	0.198117	0.182362	0.1744	0.377244	0.944913	0.935942	0.956296	NA	0.941434	0.925003	0.937273	0.892158	0.942964
cg26728517		GCTGGACCAGCCCGACTGACCTCGCGCGTAGGGGTCGCGTGAGCCACACCGGTGCAGACG[CG]CCTAGATTATTTTTAAATGTTAGAAGGTAAAATATTTGCCTCCAATTAATCTGAAAACTC	0.684544	0.660774	0.695634	0.710146	0.670809	0.906656	0.863626	0.931545	0.933812	0.872534	0.621064	0.741584	0.715336	0.673408	0.928243	0.108884	0.107392	0.103044	0.12581	0.134321	0.111987	0.102964	0.102124	0.0907923
cg22242216	GRIN2D	CCACGCCCGGGGCCGTGGCCCCCACATCACTGTGCAGCTCCCCGGCCCCAGCCGCGCCTC[CG]GGGAAGCCCGTTTTTAACCTTTCATCCATTGGGACTCAAAACTGTGAGACGCGTTCGCCA	0.241809	0.249647	0.235866	0.206524	0.20118	0.641281	0.430451	0.458856	0.558294	0.329941	0.236853	0.256129	0.239809	0.188497	0.222599	0.68936	0.651729	0.645357	0.645655	0.67054	0.646915	0.876273	0.831979	0.858813
cg21974358	SCN8A	ACGGTGGACTGCAACGGCGTGGTGTCCCTCATCGGCGGCCCCGGCTCCCACATCGGCGGG[CG]TCTCCTGCCAGAGGTGAAAATTGATAAGGCAGCTACCGATGACAGTGTAAGGAAGAACAC	0.195018	0.169746	0.142561	0.175583	0.138084	0.536326	0.344973	0.304955	0.435331	0.346349	0.156646	0.192842	0.172718	0.135101	0.298373	0.638217	0.595683	0.6676	0.718723	0.687908	0.642131	0.80937	0.790136	0.839819
cg25999604	XRCC3	GACTGTGTCAAGCAGCGGGACGCTGGCAGGAGCACCGGGAAGGCCAGCACGTGGCTGCAA[CG]TCTCCCGCCTTCAGGACGCGGGCCGAGGCCAAGGCACCTGGAAGCAGAGTGTCCACTGAC	0.197293	0.267879	0.225095	0.192778	0.213142	0.356137	0.449854	0.366579	0.559214	0.591293	0.269876	0.258291	0.197174	0.210117	0.700773	0.920618	0.919314	0.915288	0.918348	0.924008	0.907722	0.92148	0.898166	0.932119
cg21860560	F10	CTGACGCCAGGCCACGAACCCAGTACTGCTCCTGCACAGCAGAAGCACTAGCACTGAGGC[CG]GGCGGCGAACCCGGCACTGCGCCTGCGCAGCAAAAGGACACGCACTGAGGCCAGGCCGCG	0.295686	0.335484	0.30308	0.321371	0.345461	0.532392	0.567954	0.465086	0.704034	0.380372	0.336005	0.315678	0.324113	0.32132	0.204985	0.629301	0.56668	0.753585	0.66991	0.615294	0.58659	0.822802	0.796719	0.81515
cg08567517	PMEPA1	CCAAGCTCTTTGGAGGAGTCCAAGCGTGCCCAGCCCAGAGGGAGGTTCAGAGGCACTGAC[CG]TCTTCTGTTTGGGAGGAGAAGCTCACTCTTGGAGCCACAGCCAGCACTAGGTCAGGACCC	0.239089	0.244808	0.212875	0.255269	0.24538	0.401721	0.449858	0.602197	0.451219	0.333679	0.25452	0.273877	0.297305	0.258658	0.5036	0.751076	0.73383	0.73638	0.737079	0.732157	0.711442	0.697569	0.662279	0.692832
cg09485539		GGACTGAAACGAGATCATTGCTAAGGAAAATGGCAGGTCACCTTTCTTTCAGACTCAATG[CG]AGGAAGGAATCTTGCCTCTCGTCTCCTTTTACAGTACAGCGCTGAGGTGGGGGCGGGGAA	0.574235	0.58792	0.610058	0.613521	0.636464	0.803944	0.729567	0.860062	0.863009	0.834254	0.590888	0.639547	0.639896	0.658042	0.844701	0.115967	0.106058	0.110342	0.136592	0.119719	0.115279	0.108218	0.111554	0.109115
cg15494558	LRP11	ATGTGGATGTAGCACCACTTTTCTAGCCCTTTGTAGGGCTGGAAACCAGATTTCTTTCCT[CG]GGGTAGCTTGGATACAAGAGGGTGGAATTGTTAATGAATGACATGGACCACACAGAGAAC	0.207018	0.203802	0.243554	0.219325	0.199403	0.501232	0.707899	0.487219	0.859956	0.299882	0.240131	0.242915	0.213262	0.209632	0.497837	0.806959	0.818607	0.883667	0.853976	0.833819	0.843076	0.814406	0.76746	0.833067
cg00031162	TNFSF12	GGCTTAATCTGTCCCTGACTTCTGTGTCTATTGCTGGCTGGTGGCTCTCCTGACAGGCCC[CG]TATGTCTCACTTTATATCTCTGGGAGTCTGTGGTTGAACCCTGCCCTAATTCCCCTAGGA	0.411239	0.38612	0.365938	0.396697	0.372912	0.628306	0.49484	0.665746	0.558958	0.581103	0.374156	0.401267	0.404851	0.369943	0.575901	0.853726	0.865736	0.859059	0.858767	0.857341	0.850795	0.854254	0.815532	0.846773
cg15867652	BAIAP2	TGAGTCTTTGAGACCTTTTTGTGCTTTGTCACTGGGGAGCTCAAGGTGCCTTGGTAGTGC[CG]GTACTGGTTGGGCAGCTTTTGGCAATGTCAGCCAGGCAGAAACTCAGCCCACATGGAGAC	0.15461	0.202941	0.154519	0.12103	0.159779	0.338805	0.368581	0.422291	0.463393	0.261637	0.220219	0.160615	0.145705	0.1876	0.429613	0.855665	0.857421	0.840735	0.87612	0.840834	0.859722	0.789003	0.817123	0.846195
cg06211872	TBX3	GGTAAGGGGTGGGCGATTGGGTTGGGGGAGGCGCGCCAGCCTGGTATCTTCTCTAGGCAT[CG]CACTTATCTCTCGGTGCCTCAGTTCTTTCTCCACCCCGGGGACTTAATCTGGCCAGAAGT	0.624562	0.676481	0.610352	0.625532	0.601074	0.923673	0.924222	0.699795	0.944953	0.519944	0.636637	0.589334	0.630609	0.584098	0.529308	0.0917122	0.0842365	0.0721595	0.0846507	0.0866561	0.0816993	0.087506	0.0885432	0.0895269
cg04931256		TGTTTTAATTTGCCAGCCGTAAGTACGGTCAGAAAGAAGCCGGACAACAGGCCCACAAGC[CG]CCCCGCAGACGCGCACGGGAACAAACACGAACACGTTGTGAGCCAGGCCAGAGAATTATC	0.474689	0.519238	0.492053	0.499694	0.499692	0.75506	0.583843	0.753656	0.779744	0.594561	0.481251	0.501722	0.519224	0.513968	0.76423	0.12115	0.115007	0.117156	0.124501	0.114892	0.142695	0.140476	0.158577	0.140296
cg24823222		AGAGACAATTCTTAGAAGCAGCACACTCAAATAAGGGATTTAGACTTTTGCCAGTGACAT[CG]TCTGCCTAGGTGCTTTTAGTATAAAATGAGCTGTGCATTTGGACACAACTTTTTCTCAGT	0.407642	0.401231	0.386943	0.409278	0.424393	0.533725	0.699757	0.604239	0.597385	0.620842	0.412142	0.449352	0.442124	0.455175	0.754188	0.842668	0.810654	0.823056	0.839942	0.849368	0.819789	0.831617	0.796937	0.847927
cg22442557	BAIAP2	AGCTTTTGGCAATGTCAGCCAGGCAGAAACTCAGCCCACATGGAGACATAGTCAGGAGAC[CG]CTGAGGCCACCGGTGTGCACTCCTGGGCCGGTCCAGCCGGTCCAGGCAGTGCTGAGCTCT	0.257815	0.319878	0.268591	0.260915	0.319995	0.477991	0.513516	0.661032	0.7008	0.684928	0.266647	0.30246	0.248002	0.313436	0.786118	0.898474	0.894007	0.88493	0.883042	0.86567	0.892909	0.881792	0.855865	0.886366
cg01190109	PLEKHM3	GGAAAGAACACTACCCCCATTCCAGTTGACGGCTTTTTAAGTACTTTGTGGCCTTCCTGC[CG]CGGTGCAAAATGAGGTCTATTTTAGGAACTGGCTTCTTTACTGCGGGGTTAGATGCCAAC	0.231321	0.237107	0.188602	0.259262	0.272722	0.421177	0.435677	0.433485	0.488217	0.306876	0.243745	0.250994	0.311856	0.243665	0.421763	0.827349	0.843309	0.868717	0.853053	0.854287	0.86236	0.882351	0.840075	0.884476
cg06874144	CAB39	TTATTTGTCAACTGTTTGTGCTAGGAGCATGGACTGTTTCGCTCACTGCCCCATCCCTGA[CG]TACAGGAGGCGCTTAAAAAGTAGTTCAGTTACACATTAAAAACAAAGAAACAAAAATACA	0.488952	0.509907	0.505194	0.511494	0.476447	0.72481	0.686369	0.72013	0.7646	0.810523	0.47689	0.51648	0.516202	0.472786	0.631897	0.858472	0.853703	0.848824	0.840295	0.863043	0.849849	0.854913	0.825707	0.849309
cg14991004	OSBPL5	ATAGCCCCGTGCAGGCCCAGCTGGGACGGAGCAACGCAGGCAGAGCTGCACTGACCTCTC[CG]GAGTGCCGTTTGTGAACTCGAATCGAGGCGCCAAGTGCTCACGTGTCCTTTAAGCCAGGG	0.315958	0.30949	0.235357	0.269617	0.303431	0.488752	0.468807	0.47075	0.563506	0.567607	0.281279	0.261755	0.285208	0.28714	0.530075	0.885586	0.88044	0.896386	0.870239	0.882289	0.881558	0.893481	0.86417	0.879948
cg26683398	LTC4S	AGTGTGGCTGGGGGGGCGCTGGGACTCCATTCTGAAGCCAAAGGCACTGGGAAGGGCTTC[CG]CAGAGGAGGGTTTGGCAGGGGTTGCCAGGAACAGCCTGGATGGGGACAGGGAACAGATAA	0.449624	0.475034	0.424789	0.464497	0.446429	0.633114	0.645738	0.64415	0.789649	0.680235	0.431575	0.46279	0.480349	0.440922	0.631752	0.848764	0.812236	0.839739	0.823328	0.864922	0.83343	0.817753	0.818447	0.841519
cg11433622	MEIS1	CTCTGGGCTTGTTTTCAGCTTATTTAATTCACACTGAAATGTTTCTGCGCGGGACGAACT[CG]GTGTCACCGGGTCCCTCCCGGAGGGTTACTTCCTGCCCCCGACAGTGTAATGAGGCAAGA	0.726002	0.662285	0.665887	0.749748	0.734328	0.963437	0.965286	0.805832	0.911255	0.930762	0.621068	0.691636	0.733326	0.662268	0.96385	0.0342025	0.0374575	0.0317112	0.0318755	0.0407854	0.0369211	0.028601	0.0410926	0.0373791
cg10193721	LTB4R2	CACCGGAAGGGGCCTTGGCGAAGCTGGGCGGAGCCGGCCAGGCGGCGCGAGCGGGAACTA[CG]GCCTTGGCCTTCTTCAGTTCTAGCGTCAACCCGGTGCTCTACGTCTTCACCGCTGGAGAT	0.41559	0.42404	0.451426	0.379882	0.439792	0.598947	0.617192	0.655063	0.623888	0.760918	0.406569	0.440615	0.378522	0.407259	0.710726	0.65565	0.613752	0.551528	0.528375	0.64241	0.555451	0.893488	0.89574	0.922648
cg09672452	CCPG1	TTATTAATTTTACCCTCTAGTAAATATGTCAGCATGAGGAAGTGACACAACAGCTATCTC[CG]ATATTAAGGACTATTCTGGTGCTGCTCCTTTATGAAAATAATAGTAGAGAAAAACAAACT	0.19568	0.243155	0.227498	0.182247	0.264359	0.327742	0.509519	0.515801	0.383027	0.715107	0.250258	0.215769	0.185683	0.250237	0.422245	0.840497	0.828395	0.821795	0.805575	0.868593	0.808173	0.841279	0.800075	0.847533
cg20704442	MIR548F5	GCTCAAGATCGCTACGCTTTATTTCTGCGTGAGCTTATTTGAAAACCTTACTTGGTGTCC[CG]GCTTACTCTCCACGTCTGCTCCAGACCACGGTCTGCCCACGCACCCCTCAGCCTGCACCG	0.577621	0.631844	0.627457	0.646636	0.589777	0.822582	0.847539	0.799681	0.868482	0.866758	0.664512	0.623602	0.660752	0.590906	0.881695	0.140777	0.107501	0.105117	0.123135	0.11516	0.111354	0.116836	0.123781	0.0949725
cg11945895	GPR180	AAGAGAAGGCATGCGTTAAATTGTGGTCATGCGGAGCTAAGTGTCTTTGAGACATTAAAT[CG]GACACGTCCTGTAGGTTATACAGGCGCCAAGGAAGAAAATCTGCATAAGAACACAGTTTT	0.166357	0.215356	0.177247	0.204757	0.141279	0.524027	0.472015	0.357957	0.485886	0.14605	0.205973	0.190885	0.22592	0.174388	0.135588	0.709056	0.650094	0.68496	0.687871	0.678496	0.661605	0.702209	0.707153	0.743659
cg01487542	CMAH	AATCATTTCAAACTGACAGCTCAAAACCCCTTTTCCCTAAAATATTTTGTAAGCCCCTTG[CG]TTCCAAGTACCCAGGTTTAGTGGCTACCTGAGGATGCATTTCTCCCCACCCTGATATGAA	0.270217	0.312444	0.344855	0.34721	0.326051	NA	0.710033	0.830758	0.805445	0.874639	0.420608	0.288962	0.410824	0.275018	0.865356	0.836414	0.812621	0.864994	0.821334	0.838145	0.830008	0.853291	0.862446	0.83114
cg17482089	PCDHA6	CCGGCACTGCTGGCGACTCAGGCTGGCAGCGCGGGAGGCGCAGTTAACAAGCTAGTACCG[CG]GTCGGTGGGTGCGGGCCACGTGGTGGCGAAGGTGCGCGCAGTGGATGCGGACTCAGGCTA	0.262043	0.287996	0.317447	0.305664	0.377234	0.534998	0.468184	0.590453	0.741763	0.180247	0.341912	0.346461	0.332352	0.341508	0.422396	0.970953	0.9772	0.964476	0.962264	0.976448	0.955342	0.958536	0.959085	0.970487
cg16663419	PLEC1	AATACAGCAGGAAAAACTCTTCATCAGCACAAAACGTGCTGGAATAAGATAACTGACGAT[CG]GTCAGAGCTGATGCAGGGAACGCCCCGGCTCCAGGATGGCTCCAGGACCAGGCTCGGGGT	0.162507	0.27188	0.160322	0.178728	0.189569	0.431324	0.487437	0.322016	0.346602	0.255925	0.233579	0.12352	0.104312	0.218938	0.35127	0.906767	0.910691	0.93471	0.889888	0.91175	0.894915	0.91812	0.881891	0.908838
cg19954537	ARID5A	CAAGCTCGCGTAGACTCGGCCTGGCCGCCGCTCCCGGGCTGCCGAGTGGACCGGCCGTTT[CG]CCGCTTCAAAGGCTGTCTTTGTTTTGCTCCAGCTCAAGCTTAGAGAAACTTAAGCCAACA	0.605012	0.672501	0.614023	0.609937	0.688895	0.861531	0.900655	0.908096	0.816889	0.709728	0.666475	0.636449	0.65257	0.622401	0.686578	0.0364614	0.0435631	0.0396161	0.0356576	0.0449515	0.0283233	0.0361204	0.0526322	0.0326483
cg24541835	DHRS3	GTGTCGCCCTCCCACAAGTCCCTGACCGCAACCTGGAGCAGGGCAGAGACTTCCTCCAGG[CG]GACGTCCAGCCTGGAACTGGCCCGCTTGGGAGGCACAGGAATGACAGTAGCTCTGACATG	0.261183	0.326288	0.254934	0.233728	0.285412	0.419108	0.530282	0.758557	0.710517	0.621316	0.30906	0.333303	0.286018	0.242995	0.591498	0.804537	0.846004	0.821347	0.834736	0.824211	0.828342	0.817183	0.795554	0.825991
cg16875863	GRIN2D	CCACCTCCACGCCCGGGGCCGTGGCCCCCACATCACTGTGCAGCTCCCCGGCCCCAGCCG[CG]CCTCCGGGGAAGCCCGTTTTTAACCTTTCATCCATTGGGACTCAAAACTGTGAGACGCGT	0.26859	0.301725	0.270842	0.260499	0.214674	0.724923	0.665493	0.753984	0.452073	0.487017	0.340592	0.281544	0.312474	0.225475	0.457926	0.633883	0.528231	0.534909	0.547108	0.625599	0.623908	0.823664	0.774744	0.825992
cg16738984	CD97	CAGGAGGGAGTGGCAGCTATAGTCTGGCACCAAAGTCCAGGACACCCAGTGGGGTGGAGT[CG]GAGCCACTGGTCCTGCTGCTGGCTGCCTCTCTGCTCCACCTTGTGACCCAGGGTGGGGAC	0.446057	0.444148	0.40922	0.382698	0.425926	0.854622	0.52441	0.73632	0.811333	0.496119	0.429302	0.418871	0.40159	0.424816	0.645528	0.82232	0.801076	0.819211	0.778101	0.828497	0.814442	0.829283	0.812331	0.832529
cg06543221		ACTGCACCCTCACGGTCACCCGGGCCCTGAGACTGCCTTAGGAAGCCCTGATGGGCTGTG[CG]TGACGCTGGGCTGTACACTGTTCCCTTGCTTTGGCCCCAGCCTGGGCCCCATGCCCACGG	0.300817	0.355963	0.283094	0.29665	0.329325	0.435573	0.450621	0.568684	0.606799	0.587709	0.33669	0.299256	0.321942	0.330153	0.837668	0.838017	0.849809	0.847044	0.832476	0.848043	0.818688	0.837648	0.798045	0.857184
cg08686960	COX7A1	GCGGGGTGGGAGGTGGGCGGGTATTGGAGGCACCTGGAGGGGTGTCCTGAAGTGGGACCC[CG]CTCTCTGAGGCCTGGACGTGGGGACAGCCCCATCCCTAGCGAGCGTCCCAAAGGCGAGGA	0.417322	0.449024	0.415603	0.380903	0.3923	0.540791	0.587306	0.751731	0.61586	0.340001	0.402262	0.400944	0.346909	0.363953	0.506671	0.404521	0.316012	0.313249	0.288641	0.487555	0.386675	0.81803	0.843483	0.858525
cg09310092	SCN1B	CACCTAGGAAATCCAGCCGAGGACACCAGAGTGGCTTTTGACTCTGGTCCCCTGGCTGAA[CG]CGTTCCCTTTACAGTTTAAATTTAGGCTCAAGGAGAAGAAGCTGGCAATCGGCAGGGCCA	0.16555	0.21377	0.214628	0.117169	0.224095	0.314824	0.355246	0.455926	0.463203	0.146462	0.248931	0.222374	0.134506	0.239426	0.157926	0.827411	0.839326	0.833361	0.818428	0.846974	0.801569	0.822965	0.809489	0.829561
cg25660390		CGCCTACCACCGCACGCTGGGCGTGGCGCTCGACTGCGACGCCGGCGGCTTGTCCTTCTA[CG]GCCTGGCGGGTGGCGCCAGCCTCTTCTACCGCTTCCTGGCAGCCTTCCTCGAGCCGCTCT	0.251907	0.262022	0.29773	0.292475	0.175796	0.384526	0.605969	0.481209	0.472538	0.374598	0.226442	0.329156	0.274017	0.160275	0.718785	0.426524	0.394728	0.403483	0.352971	0.489527	0.525121	0.936716	0.924507	0.944625
cg05927190		CGGCGGCGGCCTTGGATGGACCGTAGTCTCGGGGACTGCGGGGCCGGAGGAGGTCGTGGG[CG]CGCGGTGGCGGCGCAGGCGGCCGGGCTAGCAGGTCCCGCGGGCCCCTGTCCCCGCAGCCG	0.602725	0.694707	0.655863	0.663824	0.596749	0.918609	0.922773	0.934904	0.919376	0.961952	0.697651	0.66644	0.667485	0.612568	0.949469	0.0696223	0.064716	0.0642106	0.0741048	0.0714169	0.0816906	0.0677174	0.0653296	0.06324
cg08400124	SHROOM3	CTCGCCAGGGCTGGGAGGAAGGGCAGATAAAGCTGCCGACGCTGTGTTCTTCTTTACCTT[CG]CTTTAATGGTCTTCACAGCACGTCGTGTTTATGAGTCAGAGGACCCTAGAGCGACACTTG	0.573436	0.58613	0.600093	0.612337	0.526895	0.826183	0.837367	0.811948	0.819552	0.573432	0.601403	0.623239	0.59737	0.50123	0.7146	0.120021	0.146586	0.132617	0.165678	0.141273	0.14606	0.125035	0.120247	0.109134
cg15402210	LOC100132215	CCCTCAGCGGCGGTGGAGCGTGGACTCCGGCGCCTGGCGGGGTAAGGCCCGCGGCAAGGG[CG]CTGCATCCGGACATCGCTGCGTGGTGCCCAGACGCTGGCTCCCGAGAACGGGCACGAGCC	0.55366	0.637822	0.58081	0.533837	0.576971	0.663468	0.924572	0.954288	0.923276	0.922284	0.59633	0.564135	0.530262	0.545085	0.895585	0.0371087	0.0337548	0.0319257	0.0325983	0.0328262	0.0372861	0.0475701	0.0385391	0.0412081
cg01300623	OSBPL10	AAACTGATGTCATCATCAATCAGCAAAAAAGCAGAATGTGATCTAACAATGAAGGAGACC[CG]TATTAGGACAGAAGGGGAGAGAAAAATATCTGAAGCCCTTCATTTTAACAACCAAAGTTA	0.190079	0.201829	0.220734	0.203994	0.199826	0.559045	0.403248	0.543813	0.389921	0.28333	0.226395	0.263764	0.228903	0.209731	0.385046	0.753604	0.82067	0.776678	0.697302	0.711581	0.697421	0.734946	0.728474	0.829191
cg08750439		GCGAGGAGTAGTGGAAAATGCTGAGTCCTGGAGCTGGCCGGAACGGCCTTCGCCTTTCCA[CG]CCCAAAGCCAGCCGCTCTGCCCACCTGCAGCTGCAATAGCAAGCAGGGCCGCAGCAGGCA	0.210353	0.264432	0.1777	0.228769	0.28443	0.376693	0.501738	0.386904	0.487149	0.375452	0.237785	0.195219	0.229661	0.244985	0.437905	0.858183	0.85254	0.869884	0.860307	0.866235	0.844434	0.864131	0.827279	0.880384
cg04316624	HOXD3	CCAACTTGCAGGGCAGCCCGGTGTACGTGGGCGGCAACTTCGTCGAGTCCATGGCGCCCG[CG]TCCGGGCCTGTCTTCAACCTGGGCCACCTCTCGCACCCGTCGTCGGCCAGCGTGGACTAC	0.737461	0.645651	0.648342	0.700084	0.643597	0.927427	0.871627	0.929948	0.938069	0.933092	0.627855	0.691035	0.748548	0.52176	0.896257	0.103646	0.0934571	0.0813687	0.0970508	0.104665	0.0942551	0.104774	0.110971	0.0911832
cg14156751		CCGCGCCTGCCTAGCCCGGCTCTCAGGACACCTCTGTCTGCGTCTCCTTCGTCGCCACTC[CG]GGTTTCGACTCCGCGTGGCCAGGCACCCCGGGTCACCACCTCTCGACCCAGGGCGAGCTC	0.14251	0.178201	0.105314	0.14199	0.204727	0.3456	0.357683	0.418539	0.51603	0.129632	0.159701	0.153524	0.130686	0.175865	0.267203	0.521808	0.451973	0.666336	0.556721	0.655845	0.584032	0.785725	0.854595	0.882736
cg10946573	DLG2	TTGTGCCTTTTTTTAGGAAGAAAAAGGCAGTCTTATCCTAAGCTGGAGATCCTTGGGCAA[CG]TAAGAGAAGGCAGCCACTTATTTTGATTTCCAGTTCCGTCTGTCTTAGGAGCCTAGGTAA	0.288714	0.347896	0.338404	0.314438	0.362343	0.463406	0.49611	0.619312	0.613617	0.557749	0.323921	0.365219	0.39023	0.344776	0.657256	0.75795	0.748734	0.705238	0.699221	0.721359	0.750641	0.741125	0.770714	0.777234
cg18503912	FXYD1	GCATGTGTTTTCTATCTCTAAGGCCCACTGGGCTGGGCCTCATGTCACTTGCCTGACATC[CG]ATTGTGAAAGATGTCACCCAGAGGCGGGCAGAGGGGCTGTCTTTTCCTTTTCTCGTTGCT	0.23229	0.305836	0.249719	0.27888	0.237218	0.419144	0.453652	0.559988	0.443622	0.506569	0.304932	0.293298	0.298166	0.246325	0.330986	0.807162	0.80749	0.837129	0.807623	0.821762	0.816912	0.793554	0.756115	0.829116
cg16195332		CCGCTCAGGGGAGGGAACACGAAAGGAAACTCTCCAGGAAGCCAGCGCGCTCGACCTGAG[CG]CAGGCCCCGCGGCTGCGGGCTAAGTGCAAGGGTCCTCAGCCTGCGCGCGCACCTGTCCTG	0.197813	0.333922	0.244335	0.243309	0.270673	0.520729	0.563564	0.511366	0.456271	0.383128	0.340946	0.27066	0.244903	0.286685	0.440025	0.488416	0.466766	0.510725	0.487504	0.460066	0.444858	0.917806	0.906198	0.903887
cg02482603	RABGAP1L	AGGTAATTCTCCACACCACTGCCTTTTTTTTTTTTTTTTTTTTTTTTTCCAATGCAGTTG[CG]TGGTGTGAAGGCGATAACTGCAGACACTCAGGTGTAAACAACCCAGGGAATCAATGGGTT	0.611665	0.574905	0.544509	0.618296	0.542036	0.854419	0.857455	0.863565	0.872652	0.596303	0.567642	0.559905	0.605097	0.512689	0.875772	0.0707306	0.081574	0.0728042	0.0796953	0.0965174	0.0862813	0.0826039	0.105128	0.0860921
cg21770322	LMTK2	TGGTACTTCCTTGTGAATCGGGGTGGGAACCCTTCAGAACCGCGAGCTCCCACTTTCTGT[CG]ATCGCTCTGCTCATGCGGCCCTGAGTCTCATGGTTACTGTGGTCTCAGTCACAGCAAGTG	0.575491	0.509617	0.544803	0.533665	0.540071	0.850257	0.904729	0.817457	0.95115	0.947355	0.464262	0.55062	0.537148	0.470303	0.949676	0.938502	0.94272	0.94223	0.9238	0.930333	0.928952	0.947877	0.909306	0.957624
cg05574357		GGGTGATTTTTTTGCTCCTGGGAGCCTTGGAAACCCAGACAGCGTTACTGACCTGGTTGG[CG]GAGGTCACCGCGGGCGCCAGGCGTGCGCGGGAGCTGGAGCTTAACACCCAGCCGCTGTCC	0.664473	0.720347	0.655314	0.641955	0.654247	0.916611	0.893315	0.859343	0.910103	0.894759	0.727857	0.679927	0.634162	0.605923	0.913504	0.225223	0.239287	0.194762	0.228165	0.231383	0.198607	0.262787	0.256313	0.246565
cg06383798	BPTF	AAGCTATCTAGGGAATTCCAACCACCAGTCATTAACATATAAAAGAAACTCTTATCACTC[CG]GAGATTCCAACCGTGTTAGGAGCTAAGTGTCAGGAAATGGGGACAAAAACCAAATATATA	0.579654	0.602539	0.629858	0.622337	0.662465	0.827314	0.832582	0.849722	0.829581	0.632936	0.623541	0.658243	0.659377	0.664924	0.817693	0.154091	0.151251	0.124889	0.146304	0.153578	0.125342	0.170872	0.156184	0.119607
cg14042143	IQCE	AAGCAGAATCAGCTGGCGTTTTCTGTTTTTTTCCAGTGCTACCGGTAAAAGAACCACCAC[CG]CAGCTTCTACCAGGAGGAGATCGGCTTCAGCCACACACGGGGACGCCTCCTCCCCACCCT	0.296889	0.328157	0.380343	0.261278	0.320705	0.510109	0.574671	0.624585	0.572738	0.826156	0.349913	0.42049	0.282602	0.316872	0.598283	0.899742	0.896067	0.89996	0.898175	0.90707	0.892233	0.897164	0.877106	0.901422
cg26530319		CCCAGCGCGGACCGTGCGGGGCGCTAGAACCGCTCAGGGTTGAGGCTTGGAGCAGGAGAG[CG]CGCGGGCCCCGGAGCAGAGCAGAGCAGAGCAGAACAGAGCCGCGGCCCCCGCCCCTCCTG	0.641744	0.555018	0.649309	0.599049	0.628719	0.745975	0.756139	0.923326	0.888565	0.895096	0.564252	0.668196	0.612016	0.578586	0.894975	0.0749466	0.0829449	0.0607632	0.0852564	0.0814413	0.0911524	0.068768	0.107527	0.0664179
cg02220837	BHLHE40	CAGACCCAGCTCCCAAAGTGATGGACTTCAAGGAAAAACCCAGCTCTCCGGCCAAAGGTT[CG]GAAGGTCCTGGGAAAAACTGCGTGCCAGTCATCCAGCGGACTTTCGCTCACTCGAGTGGG	0.219273	0.284349	0.247138	0.166421	0.223193	0.647888	0.671421	0.549937	0.623054	0.78808	0.279677	0.254537	0.184728	0.244041	0.760937	0.904917	0.871028	0.899441	0.895251	0.885011	0.869043	0.899727	0.828557	0.894411
cg12676534	DUSP15	ACTCCTCCCACTTTGCACCTCTGTGCTCACAACCCCATTCCCACAGATTTCTTCCTTGCC[CG]ACTCTTTCCCAACGCCGTGCTGCAGATGAGCCTCTGGGTACCGCCCTCAACCTGCTGAGA	0.652278	0.691295	0.681659	0.666971	0.578946	0.912739	0.794713	0.944908	0.895911	0.727907	0.697755	0.687994	0.67802	0.620555	0.791726	0.0831704	0.0750663	0.0746542	0.0636012	0.0619641	0.0814867	0.0909119	0.0756987	0.0606087
cg15182635	C10orf41	ATTGCAGCCCGCCTCCCCTATTAATCTCCCTCGAAGATAATCCGCCTGACAGGTCAGGCC[CG]GCGAGCTGGAAAGCCTGGCCCAGAGCACCCAAACAGTCCCGGACTGGCGCGCGCCCCCGG	0.589362	0.691041	0.619728	0.649826	0.574068	0.884985	0.872352	0.73545	0.872	0.668278	0.712664	0.640541	0.662338	0.590887	0.87021	0.0369389	0.043345	0.0466998	0.0414133	0.0456651	0.0358921	0.0363395	0.036447	0.0359829
cg09139409	CACNA1H	CCTCAGGGTCTGGGCCGGGTCCAGAAGTCAGCATTCCCCTCAGTGCCAGGAAGGCCATGC[CG]TAGCTTTAGCTCAAAGTCCTGAGCTGGCTAGGGTGGCAGGAACTGCCAGGGTCAGGCAAG	0.507972	0.51579	0.493152	0.523199	0.50307	0.709945	0.633985	0.780985	0.775676	0.619202	0.530505	0.509161	0.52034	0.496241	0.470305	0.780774	0.785072	0.771672	0.763264	0.790849	0.760096	0.779734	0.741494	0.77633
cg04722643	SECTM1	TCTCAAACTCAGATGTTACTGGGTATCCTGCGTTTTTGTTGGCAGCTCTGCCACTCTGCC[CG]TCTGCCTGAGTCCTCTCCTGCCATCCTCCTGACCAGAGGCGTGGGCTTGAGTTGAATGCC	0.431774	0.43448	0.418134	0.432833	0.386748	0.53138	0.737155	0.708437	0.678049	0.584929	0.420403	0.48122	0.470256	0.401472	0.706119	0.812804	0.819184	0.828062	0.827018	0.836488	0.822179	0.814643	0.762037	0.817268
cg24580724	CRYZ	ACAGGCACTGCAAAGGAAAGCATAAGTTACATCACCTTATTTTTTGAAGCTAATTAATCT[CG]GGTGTTTTCATCATCTTAAGGAATTTCTACCCCTAGTCTGGCTAACACTTACACAAACAG	0.316461	0.371427	0.356481	0.335241	0.416816	0.588155	0.721511	0.794063	0.887066	0.312216	0.389926	0.359534	0.34655	0.403721	0.698102	0.875584	0.872626	0.878688	0.868806	0.861488	0.861979	0.870255	0.846763	0.8927
cg11265839	ELK3	CTCAGAGGAAGTCAGCTCAGCCAGCCCTGTGGATAATGTGGATGGAGTGGTGGCTCCCAT[CG]GTGGGGCTGAGGGCGTGAGAGAAGGATCAAGGGTGGATGCCCAACAAATGGATGCAGAGG	0.271876	0.357514	0.341052	0.276339	0.262253	0.421329	0.575582	0.694895	0.57641	0.569616	0.349009	0.352964	0.272958	0.34	0.440185	0.885655	0.847696	0.851254	0.855986	0.859949	0.854624	0.846173	0.830684	0.849211
cg00495201		GGGCTGGCTCAAAAGTGATTTTGCCTAGATGAAGCTGGCAGCTGGGAACCACTTTCCCTC[CG]CTTGCCCTCTGCCGGGGAAACTCCATGACGGAGACAAGGCAGCTGGCAGGGAGAAGCCTC	0.436343	0.499851	0.437215	0.443021	0.458538	0.682615	0.637456	0.70501	0.651632	0.651808	0.521052	0.485505	0.482338	0.473179	0.858987	0.850731	0.839533	0.830371	0.830684	0.845397	0.8139	0.84535	0.805043	0.842577
cg27162122	WWC2	ATGCACTTTTGTGACATGATTTTGCATTTCTGTTGATTTTCATACTATTTATTGAGAGCA[CG]GTAGAAATAACAGGGAAGAGAAATAAATAGTCATCATGTTGTGATTTATTTATTTATATT	0.192449	0.283734	0.180231	0.16708	0.189878	0.357519	0.490137	0.316507	0.492456	0.27968	0.258494	0.190101	0.194907	0.190883	0.280203	0.813282	0.81738	0.827216	0.792982	0.824983	0.806115	0.807256	0.764106	0.815168
cg00983948		GCACCCGCCCTGCGCGCACCCGCTGTAAGCGCGATCCCGGCCGCCGCCACGCAGCACGAG[CG]CTCCGAGGGACTTTTGAATGGAGACGGAGTCTTGCTCTGTCGCCAGGCTGGAGTGCAATG	0.237568	0.346343	0.267371	0.285731	0.197718	0.492437	0.601036	0.385298	0.49134	0.320688	0.341937	0.321409	0.293176	0.265472	0.366046	0.507598	0.471614	0.548181	0.489504	0.461441	0.41825	0.926702	0.909071	0.926098
cg12635937		CTTGCTTTCCTGGCTGGGAGAACGCAGGAATTGGAGAACTGAGCTGTGGGCTCGAATCCG[CG]CATGACCTGGAGATCTGGACCAAGCTCCGAGGCTTAATGGGGAAAGCTGAGATGTCCCCA	0.432604	0.489283	0.47166	0.484795	0.475292	0.645663	0.599485	0.795931	0.72262	0.732108	0.475307	0.483494	0.469109	0.462842	0.7328	0.0890233	0.0936704	0.0943272	0.0910475	0.115642	0.106463	0.111968	0.154141	0.106131
cg18964590	SLC43A2	ACTGGAAAGGATGCGCACAGGTGGACTCGTGCTTCATGCCAACGTGTGGCCAAGGAGCCC[CG]CCGGGGCCGTGTGGATGAAGAGCGTGGAACTGGAATCTGGTTTCTAGCTTCCAGTGTTTG	0.591257	0.594444	0.581903	0.582424	0.547299	0.784704	0.784892	0.875599	0.882475	0.779643	0.589627	0.597173	0.580284	0.575118	0.726896	0.88224	0.873994	0.889595	0.871601	0.868916	0.857533	0.87783	0.844077	0.880272
cg16139302		CGCGGGCCCAGTGCTGGCCGGCAGAGCTCAATATGGCCAGCCAGTGCCCAGGTGCATGCC[CG]AGGGGGCGCGTCACGGCTTCCTGTTGATCCGGATGCCCGATGTCTTGGGAGGCACTGACC	0.48399	0.449071	0.498034	0.500938	0.506637	0.74755	NA	0.735384	0.77304	0.415434	0.443915	0.520964	0.498993	0.456201	0.469269	0.794373	0.778572	0.785524	0.760407	0.790956	0.7908	0.777987	0.767619	0.772103
cg27310710	NCOR2	GGCGAAGAGGAGGAATTTTTTTAAAAAACAAAAAAACACAGATTATAAATAGAGGCTTCC[CG]GAGCAGCGGGCACCTGCCCAGCCCAGTCCAGCATGCTGATCCTCAGCACGGGGGAGGGAG	0.305078	0.402002	0.312881	0.295796	0.329904	0.600959	0.517244	0.470436	0.6461	0.667768	0.425263	0.320766	0.307385	0.39805	0.589368	0.823206	0.831866	0.861077	0.843091	0.815467	0.827202	0.839794	0.815834	0.830255
cg08425187		CTGGCCTTGCCCCACACACATTTGGTTCTAGCTCCTTTGCTTGGGTCTTCATCCATGCAG[CG]AATTCCTTAGCCACAGGTGTCCCTCTGCTCTCTAACTCACAGCGAGCTCGCTGCCCAAAG	0.561185	0.569988	0.585782	0.620233	0.555752	0.796615	0.818135	0.788159	0.82655	0.816198	0.557236	0.611122	0.623812	0.533786	0.812358	0.171775	0.15491	0.145223	0.182448	0.218613	0.177733	0.17029	0.226728	0.194477
cg11961401	FLJ41941	TGTCTTTTACCAGCTGGCCATTTTATTTGCATAAGGTACACTGAAATTCCTAGAGACCTA[CG]AGGTCATTCTCTGCTCCCTTGCTTTCCTCAGATGAGGAAACAGAGCTCTACAGAGGTTAA	0.481651	0.460703	0.482488	0.490464	0.450999	0.670906	0.674844	0.810195	0.722243	0.355952	0.558102	0.514607	0.52545	0.492426	0.26257	0.809498	0.763517	0.752159	0.773696	0.753874	0.780649	0.744586	0.727988	0.771733
cg03127104	GABBR1	TCCATATCTGTCCAGGAGCCGTTGGCCAGGCACTTGCGGACCTTGGGCCCCACCACCTCG[CG]CTCCCCCCGGCACACATACTCAATCTCATAGTCCACTGGCAGGAAGTTGATAGCCTTCAC	0.511884	0.614858	0.586908	0.569454	0.561293	0.714169	0.772741	0.79162	0.83518	0.350919	0.605061	0.609243	0.572159	0.556874	0.249781	0.0842631	0.0999868	0.101203	0.110268	0.135705	0.103302	0.0999518	0.127719	0.0870577
cg16352283	FAM46B	GCACGCTCAGCGTGGGGAAGTTGCCGCGCCCGTGAATGGGAATCGGCTCGCTCAGAAGAG[CG]TCCAGTCGCTTCACCTGTGGCCAGCTCAGCCCACTCAGGTGCCGTCCGGGGAAGGCCGAT	0.497493	0.439922	0.426634	0.429782	0.44297	0.549269	0.720419	0.817461	0.791569	0.834966	0.410291	0.425942	0.427823	0.438068	0.846518	0.0884509	0.0852051	0.0795432	0.0839076	0.0871627	0.0901614	0.101363	0.103645	0.078466
cg09538809	PCDHGA4	AACTGATATTAACGACAGCGCCCCAAAGTTCCAGGCCGAAAGTCTGGAAGTAAAAATTAA[CG]AAATCGCGGTTCCTGGAGCACGTTATCCACTTCCAGAAGCTATTGATCCGGATGTTGGCG	0.463253	0.521465	0.520649	0.458962	0.499963	0.731697	0.68289	0.594694	0.789346	0.540738	0.486216	0.504585	0.447286	0.48011	0.58967	0.872862	0.867038	0.866619	0.856143	0.873699	0.850395	0.865573	0.842818	0.865359
cg21201294		GACACCCAGAGACCGGCAACGGCAACGCCTAGGTCGGGATCCAGGTTTGGGAGAACCATT[CG]CGCGGTAGTCACACACACACTATGCTTCTCACGCCCACTGCTGCAAACACCTTCGTGGGA	0.456958	0.472888	0.432517	0.475702	0.508031	0.737316	0.744961	0.618324	0.656985	0.795733	0.428162	0.466598	0.490383	0.469542	0.782662	0.886185	0.904754	0.917954	0.916521	0.900746	0.889014	0.900086	0.843387	0.900822
cg23671708	TMEM88	CTGTGGAATGTCCAGGGCTCTGGTCCGCTCCTCGGGATGGGGGGTGCCTAATCCTAGAGC[CG]CATTCCAGGATAAGGGGGGTGGGGAGAGGCTGGGCCGGGGGAGGGGCAGGAAAGAGGGCT	0.566402	0.563465	0.652974	0.614813	0.558573	0.727315	0.841681	0.87666	0.851769	0.889481	0.621872	0.648935	0.617318	0.510617	0.865175	0.0865414	0.0638272	0.0656051	0.087401	0.0823794	0.078414	0.0751017	0.117319	0.0761671
cg13920460	TJP2	GCCCTCCCGACTGAGCAGGGGCTCCCGAGGTGACTAAGCAGGCTCTCTGGGTAGTGCTCC[CG]CCCTCACCTATTGTCCGGGTGGAGGAACCGGTATTTCCGGATGGGGGCCTCAGACCCAGT	0.557993	0.628902	0.639247	0.605277	0.548654	0.844059	0.818703	0.801933	0.820092	0.615911	0.658836	0.625685	0.611964	0.607885	0.811671	0.119748	0.139181	0.115214	0.114446	0.12824	0.128148	0.124031	0.139169	0.123359
cg16056164	PCNXL2	AGCAGGCCTGAACATAGTGACTACCATGCATTCATCTACAATTTGTATCTCTGATTCTAA[CG]TGCTTACACCTTAAATTAGTATTATTTCTTCCATTTCAGCAAGAAAAATCCAAGACTACT	0.426676	0.441566	0.457233	0.431768	0.473164	0.623396	0.691349	0.64707	0.663988	0.900444	0.405274	0.441168	0.454419	0.412839	0.895589	0.867126	0.84506	0.837173	0.815843	0.830971	0.816203	0.786769	0.771292	0.836342
cg10333023	KCNJ5	TCTGGGACTAGGCATCAGCACGTTGTCCAGCTCCCAGCTGATGGCAGCGTGCGTCCAGGG[CG]GAGAGGTCGTGCTACTCAGGTGTGCACTGAGGACCAGCCGCGTCAACATCACTGCGGCTT	0.643229	0.67944	0.674785	0.603685	0.630891	0.910529	0.891582	0.896712	0.737102	0.664026	0.665863	0.691417	0.615971	0.680997	0.770072	0.102213	0.103511	0.149685	0.184878	0.161435	0.132904	0.119309	0.186253	0.0954837
cg16748008	HOXA3	ACAGCAAACACTTGCTCCTTATGGCATATTGCAGAGCAACTTGAAAGGGGGAGCTGGCCG[CG]TAGGAGGTGAGAGCCAGCCGCAAAAATCCGTTCGGCGGCATTTTCTCTTCAAACCCGCCC	0.718394	0.62618	0.65341	0.749427	0.637659	0.940931	0.927261	0.937292	0.969968	0.955805	0.616404	0.663806	0.780055	0.598541	0.941339	0.0486122	0.0607781	0.0443224	0.0554954	0.0537692	0.0675095	0.0865048	0.0813008	0.0702427
cg04751761	SLC9A3R2	GGCGTGGGAAGGGCTGCCGGGCCAGCACTGTGGGGCTGGCCGCATGTGTGGGCTGCTGTG[CG]TGTTTGCAGGTGTGTGTGGACGTCTTGTGTCTGTGGCTGTGTGATGTGTCTTTGCGGACT	0.194552	0.249959	0.242979	0.138073	0.196788	0.488131	0.307647	0.492663	0.466128	0.412961	0.247394	0.245429	0.17217	0.209818	0.343595	0.840907	0.849622	0.839513	0.83165	0.847781	0.849056	0.857221	0.766612	0.83183
cg25036707	SOX10	GCTGGGAGGTGACGCTGGTGGGCTGGGAGGGAGGGGCGGGGGGCCCTGAGCCTCAGGCCA[CG]GCCTCGTTAGGACGGAGCCTGAATCCTTACCACCAACCACCCTGGCCGGACAGCCCGAGA	0.589333	0.568033	0.558579	0.518157	0.501052	0.791668	0.759704	0.803331	0.778275	0.559547	0.566581	0.569919	0.538701	0.532741	0.819172	0.170249	0.163245	0.188202	0.198813	0.178837	0.187106	0.13461	0.142584	0.139504
cg08787039	C1orf14	CCCAGATGCCTGTCCCCAGGTTCCGACGAGCTTCCGACCGTAGTCTTCCTGTCCCGGATC[CG]CTCACCTTACAGTCCTGCAGCACTTCGTCGCAATACAGCGACACCTTCTCGTCCCGCCAC	0.616223	0.631646	0.657384	0.592716	0.637502	0.890964	0.737101	0.906135	0.89243	0.648599	0.630586	0.644545	0.609771	0.568878	0.655594	0.907506	0.892307	0.882363	0.876189	0.904217	0.907056	0.913426	0.904542	0.915091
cg20367712	GSX2	GAGGCTCTGACGCCAGCCAGGTACCCAATGGCAAGAGGATGAGGACGGCGTTCACTAGCA[CG]CAACTCCTGGAGCTGGAGAGAGAATTCTCTTCCAACATGTACCTGTCTCGACTCCGGAGG	0.644357	0.605421	0.547273	0.530879	0.581939	0.891082	0.903068	0.83919	0.913713	0.901733	0.573864	0.574934	0.509594	0.579904	0.899943	0.0613624	0.0699013	0.0555003	0.0665198	0.0687868	0.0616262	0.0671561	0.0856776	0.0738313
cg21742058	MAGI1	ACATTAAAATATTATTTATCCTCATTACTGAGGTTTCTAGCACTCCCTTCAATTCTGTGC[CG]GTGGTGAGTGCCTCCTCGTGTCACCCCAATCCTGGCCCTGCACAGCTGTCAAAACAGTCC	0.230796	0.288834	0.303256	0.189921	0.230738	0.536522	0.479378	0.47687	0.528422	0.130695	0.316175	0.30906	0.209777	0.30251	0.287438	0.894627	0.889979	0.875422	0.860867	0.875663	0.864464	0.878036	0.811435	0.897871
cg21436413	SEL1L3	CATCCTGGCCAATTGCACAGTAGCTGCTAATTGCTAGAGCTCTGCTAATGGCCCGTACAT[CG]ATGAAGAATGAGTTACAAGCAGCAAAATCCAGAAGACAATAAGCTAGTGTGGTTTAGAGC	0.439823	0.400988	0.415888	0.354583	0.400624	0.558967	0.803444	0.831132	0.874769	0.536256	0.422987	0.434274	0.368751	0.403334	0.796228	0.793499	0.785562	0.818263	0.802516	0.775349	0.773721	0.74843	0.752999	0.767585
cg03699566	FOLR1	CACTACCCCATGGAGGCCTGGCTGGTGCTCACATACAATAATTAACTGCTGAGTGGCCTT[CG]CCCAATCCCAGGCTCCACTCCTGGGCTCCATTCCCACTCCCTGCCTGTCTCCTAGGCCAC	0.247141	0.311892	0.231342	0.272294	0.244944	0.423599	0.486255	0.645234	0.529444	0.275498	0.378511	0.33723	0.343073	0.312632	0.524002	0.768	0.736497	0.746921	0.737573	0.728553	0.733862	0.73282	0.672321	0.745783
cg18073390	PCDHA1	ACTGACTGCCACTGATGGGGGCAAACCGGAGCTGCAAGGTACAGTTGAGCTGCTGATCAC[CG]TCCTCGACGTTAATGATAACGCCCCACTGTTTGACCAGGCCGTATACAGAGTCCACTTGT	0.551512	0.499543	0.471184	0.545131	0.519208	0.832721	0.643314	0.833623	0.827719	0.397478	0.499696	0.458162	0.585305	0.465822	0.390841	0.893517	0.903897	0.870707	0.874556	0.884045	0.89312	0.891274	0.873748	0.900197
cg24439623	ABR	GGTCCCCTTGGGACACCGAAGCCGGCCTGTCATTGGGGCAGACCACAGGCGTGAGAGGCA[CG]GCGGGGCTGGCAAGCTGGCAACGGGGGAGACGGGAGTTGCCAAGACCCTGCCTCTCCTCC	0.251887	0.343997	0.200783	0.269387	0.309115	0.421428	0.468614	0.499298	0.595001	0.462216	0.280308	0.233105	0.275118	0.309561	0.582056	0.622589	0.605457	0.871333	0.869223	0.858633	0.844598	0.879117	0.844734	0.880411
cg26584337		CCAGGCAGCGCGGGTGCAGACCTCGAAGAGAACAAAGGCCGGGCAGGTGGGAGGGAGGGG[CG]CTGAGCCCCCGGCCCGTCCTCCTAGGCAATGCTCGTCTGTCTCGGCTCCGCGGCCACCGC	0.41507	0.465986	0.39226	0.410399	0.46121	0.700835	0.781899	0.77537	0.640126	0.669721	0.420403	0.407	0.413725	0.46334	0.809959	0.0566506	0.0691256	0.0548951	0.0640571	0.0803828	0.0731425	0.0779541	0.0782665	0.0702041
cg11883836		CCCGTGGGAAGCAAGGTAGGACCCGCAGCTTGCAAGAATCTGCAAGGTGGGAACGGCGTT[CG]GGATGTGTTTGGCCCCCCAAGGCCAAGGCACGAAGGGGTCCCAGGCGGGTCGCCAGCGGC	0.462529	0.54849	0.464113	0.456547	0.439049	0.78377	0.859791	0.68682	0.595167	0.694829	0.495674	0.508122	0.46289	0.522865	0.446034	0.55808	0.505711	0.712845	0.652874	0.704481	0.609972	0.936983	0.919178	0.943573
cg26947448		AATTAAGCCTTAAACCACTCAGGAAAGAAAAGCAAAAGGCGCGTGGGGATGTTTGCACTG[CG]CCCCTCCCAGCTGCTCTGGCCCCGGAGCAGGCCAGCCGCGAGCCGCCCCACTCCCAGCCC	0.423265	0.431139	0.383079	0.39412	0.334516	0.806421	0.784468	0.701005	0.538441	0.740443	0.403608	0.402531	0.403315	0.352936	0.604851	0.817279	0.820022	0.826897	0.852483	0.821865	0.800665	0.842609	0.803938	0.841656
cg18184219	CEP170	CTTGACACAATTACCTGCAACATGAGCTCACAGTCATCTCTTCCAACAAAAATCATTTCT[CG]TGGCAGCCTGTGGCGAGTGCCTCCACTGCTCACCAAAAACCAGGATGTTAAGCTCATTTT	0.401831	0.467393	0.412065	0.368226	0.445395	0.763008	0.686022	0.546242	0.809545	0.568457	0.448079	0.442104	0.421613	0.440912	0.52708	0.876935	0.883018	0.82517	0.845039	0.850872	0.85897	0.870402	0.829934	0.858591
cg11622008	SPSB4	CGAGGCTTCTGTTTTGGCCACGCCCTTTACCCCATCGCTCAGTTCAGGCTCCCAATGAGG[CG]GCCCACCATCAGCGCTGGTAGAGCAAAGAGACCGACTTCCTGCGCCTCGGGTGGGCGGGG	0.556233	0.592301	0.619471	0.613657	0.5193	0.79329	0.783525	0.772513	0.822638	0.657872	0.608761	0.638577	0.627014	0.514068	0.481281	0.0873333	0.0853934	0.0729437	0.0938491	0.0948638	0.0944635	0.0944997	0.134271	0.120063
cg19005335	NCOR2	GGTCCACTGAAGCCTGCTCCCCGGCAGGCGCGCAGGCCTCGCTCCCCCAGGGCCCAGCGA[CG]TGGGCACCGCTCCCCACCAGCCCAGCCGACACTGCCAGCCCTGAGATGCCTTCCCTCACC	0.275439	0.37225	0.302805	0.252632	0.277648	0.677579	0.591617	0.535461	0.666012	0.562147	0.371376	0.290209	0.244754	0.341535	0.508261	0.788677	0.750949	0.791809	0.784911	0.802943	0.79576	0.791357	0.770104	0.791375
cg11133963	ABI3	CAGGATTGGAGGGGTGGGGCCAGTTGGGGATGCTGCATTAGGGAAGGCGTGTCCGCCAAC[CG]GGCTCTCTGGTGTTCAGCAGCGCCGAAGGTGTCGGTGGGGCCCCCACGCCCAAGGGGCAG	0.593272	0.557224	0.590806	0.594867	0.543954	0.862587	0.79296	0.850846	0.832888	0.326354	0.528201	0.606012	0.600153	0.521107	0.503345	0.802819	0.771547	0.810947	0.804832	0.800616	0.754191	0.834392	0.838375	0.845629
cg16937168	SNED1	AGGGGCAAGCTTTCAGGAGGTGCCAGTGCAGGGTCAGCTCCTCCTTAACAATTCTGCACC[CG]GCCCTGACACCAAGTCTAAAGGGTCATGAACCTCTGAGTGAAAACACCAAGTGCAGGATC	0.217272	0.366742	0.289039	0.25096	0.266034	0.458345	0.467479	0.590704	0.481904	0.357941	0.346009	0.26084	0.223126	0.275985	0.694082	0.870637	0.871293	0.875801	0.874917	0.868917	0.878163	0.868107	0.847062	0.870168
cg07080050	HOXC4	GTGAGGCCTCTATTTCTCTCTTTCGCCTGCATTTTGTCCGCCCCCGCCCCTGTGGATGGC[CG]CTGATGGGGGGGAACACAAGTGTCCTTTGTCCGTCCCCGAAAGAAAACCTTTTCCAGAGA	0.542711	0.591127	0.485293	0.548279	0.557121	0.871136	0.705157	0.791415	0.888554	0.709935	0.536838	0.495185	0.566057	0.543022	0.6275	0.130534	0.146251	0.11236	0.136101	0.144165	0.136212	0.13538	0.14171	0.150449
cg16178603	MEIS1	CGAGCCGGGGGTGGCGGGCGGGGACGTCTGCTCGTCAGAGTCATTCAATGAAGATATAGC[CG]TGTTCGCCAAACAGGTCAGCAAAATAGATGTTAAAAAGTAAAAGAAACAAAAAGAGAGCC	0.662468	0.571359	0.567343	0.638478	0.702026	0.953905	0.95106	0.760379	0.964845	0.978828	0.523282	0.590773	0.647324	0.589608	0.979444	0.0281805	0.0273143	0.0223885	0.0253457	0.0262167	0.0295932	0.0255673	0.0344325	0.0233007
cg10323433	HTR2A	GTGTTTGTGTCCAGAGTGGAATTACTGACATTGGCCACATAGGCTCAGGGTGGCTAGGCA[CG]TCTGTGGTGATAACTCTGATAAACTATTAGCACTATTTTTATTTAATAGATACACCATTG	0.231584	0.209108	0.229402	0.176295	0.326031	0.466593	0.410551	0.516188	0.384752	0.477165	0.222336	0.257767	0.256106	0.276229	0.307803	0.833426	0.787181	0.810997	0.786722	0.8195	0.797105	0.808311	0.804405	0.828708
cg00563926	TGFBR3	GGGCGCGATATGAACGACAGTCTCGGCGGGGCAACGTCCTAAGTACCTGTGCCTGTGCGA[CG]TCCTAAGTACCTGTGCCTGTGAAGTACACGCTGCAGAAGTTGAACTGCTGGCACCAGAAC	0.480923	0.514366	0.512807	0.439439	0.490599	0.784403	0.706711	0.69002	0.855754	0.746712	0.493965	0.528308	0.457889	0.459753	0.630732	0.147025	0.149026	0.141721	0.147305	0.14938	0.162481	0.156528	0.168499	0.162336
cg15801751	MARK2	GCATGTCAGCAGTGATCTGGAGGAGATTCCGGGGCGCATGAGTATGTGAACTCTGGAGCA[CG]TTACTGTCCCGGGCTGGCACTCTGTGGCAGGTGTGTGCACTCATTCTGCTGTTACTGGAG	0.377045	0.393555	0.446333	0.387252	0.351054	0.627118	0.59541	0.707656	0.618349	0.582353	0.382499	0.448741	0.386492	0.37404	0.791496	0.728455	0.715596	0.720587	0.717081	0.692162	0.701862	0.75288	0.760391	0.777843
cg03540494	PIP5K1C	CGTGTCGTGAGAGTGCTGGCTGGTGAGAGAGCATGTGGGTGGGTCGACAGGGCACACTCA[CG]TGCCTGTGTGCAGGTGTGTGTATGCGGTGTGCACACGGTGGAGCGTGTGTGAGAGAGAGT	0.559058	0.612236	0.595003	0.602017	0.563144	0.747058	0.8277	0.814957	0.878159	0.701121	0.64041	0.624048	0.639726	0.652127	0.558713	0.856105	0.841947	0.844435	0.836719	0.862204	0.829534	0.859552	0.840875	0.848345
cg00615592		GCAAACACCGCAGCTGGCTTTTCGCTGTCAAGGAGTTCTGCTTTCCTCTGTGATTTCTGC[CG]CATCCTGTTCATTTCTGTCTCAGTCTTGGATTTTTCAGCTGGAAGGGCATCACGCACCGT	0.56839	0.596017	0.568096	0.532717	0.564853	0.83562	0.697761	0.767845	0.844281	0.596977	0.622894	0.599475	0.563997	0.558135	0.692135	0.673339	0.645127	0.687446	0.703974	0.688041	0.653506	0.833363	0.808268	0.823934
cg07109332	C1QA	CCAAGTGTTTTGTATGTGCAAGTCATTAAAATGTTATAATAATCAGATGATATAGGACCC[CG]TTCCCAGTGTACAGATAAAACTGAGGGCTCAGGAGGTCAAGTAATTTCCCAAAGACATGC	0.351392	0.457125	0.412551	0.373491	0.368173	0.730904	0.622952	0.549915	0.556455	0.280703	0.414029	0.393364	0.358954	0.397372	0.446142	0.837097	0.842997	0.875442	0.826136	0.84758	0.838359	0.864336	0.82319	0.847746
cg25371919		TCCCTCTGTGTATTTATTGAAGAGAACCGCTTGGTTTCAGGAAGCTGGGCGCGGGATATC[CG]AAGTGTGGAGGAAACAGACAAGTCAGGGTACAGAGGTGGGGGTTGGGCAGGGGCGCAGGG	0.458255	0.446103	0.444594	0.402178	0.377178	0.790565	0.773178	0.913439	0.590993	0.599256	0.410467	0.435798	0.379116	0.384234	0.34811	0.0557349	0.0544319	0.0583601	0.0538291	0.0623078	0.0569457	0.0695934	0.0783135	0.0616831
cg25391117	C1QTNF3	AAAGCATGATTCTCAACAGAGCCTCAGAGTCTCCCTGAGAAGACAGCAGAGCTCCAGGAG[CG]TGGTCTCCTCGGGCAGATGCCAGGACTGGAGCTGAGAGCTGCAGCGGCGGAGTGGTTTTA	0.383199	0.431262	0.351898	0.381474	0.38645	0.581744	0.556564	0.634552	0.643224	0.437816	0.43253	0.397457	0.410758	0.414249	0.513036	0.78956	0.797845	0.791296	0.791405	0.806456	0.78662	0.810039	0.737406	0.786924
cg12655251	GLIS1	CCCCATTCCCCGTGAGCCTGTGGGAAACCCTGTGGCCGTCCCCAGCCAGCAGCCAAGCTC[CG]CCTGGAATGGCCATGTGGGCTGCAGCGCCGGGCGGCCTCCCTCTGTCTGTAATGAGGACG	0.366028	0.38839	0.356288	0.359422	0.35587	0.540138	0.55858	0.711111	0.582041	0.429811	0.381885	0.392638	0.39854	0.392061	0.697388	0.740698	0.746364	0.7703	0.751951	0.759937	0.737645	0.753411	0.682202	0.773816
cg17767427	KDM4B	ACGCTGCCTGTCAGCACCTGCCTGGGCTGTGTCACCTAGAGTGTGGCTCCGTGTGTGCGG[CG]CAGACACCGTGGGGGTGTTTGGAGCTTCCTGCGTGGCTCCCAGATGTCTTTACTACACAG	0.541202	0.556486	0.559739	0.511288	0.544719	0.648949	0.816732	0.816019	0.771457	0.704905	0.550857	0.601341	0.543786	0.525063	0.621291	0.828983	0.825341	0.830841	0.802359	0.823312	0.835917	0.84212	0.792398	0.837349
cg03203197		CCGGGGAGGGACTGGAGCGGCGGGACACCTTCGGGGAGCGTGCAAAGGTGGAACCGCAGC[CG]CCGCCACCTCTCTCTCCCCTGGGGATGTGCAAAATTACCATGAAATTATGACTTGTCATC	0.489292	0.502242	0.475518	0.439841	0.532705	0.673698	0.676912	0.773789	0.718268	0.78074	0.489856	0.51236	0.426641	0.478995	0.698687	0.871866	0.874024	0.89247	0.888862	0.898621	0.853722	0.873841	0.836396	0.878113
cg09018483	NOTCH4	ACCACCCCTGGCACCAGGCCCGAAGCAGCTCCATGGGCAGAGCCGTCTTTCCCTGGAGGC[CG]TCTCTATTTGGGCAGTGAGAATCTCCTCCATCCAGCATCCCTCACACGGCCTGGGGCTTG	0.424859	0.474773	0.383245	0.419336	0.427724	0.718934	0.599246	0.683258	0.839133	0.411903	0.46911	0.39059	0.442243	0.435103	0.681165	0.836067	0.820279	0.835989	0.81833	0.837043	0.80345	0.845337	0.785374	0.843046
cg20208990	PMEPA1	GGAGAAGTCAAGCCCAGGGATGTGGCTCAGGCTGGTCCAAGCTCTTTGGAGGAGTCCAAG[CG]TGCCCAGCCCAGAGGGAGGTTCAGAGGCACTGACCGTCTTCTGTTTGGGAGGAGAAGCTC	0.271052	0.376282	0.272212	0.277374	0.286878	0.582037	0.54131	0.536037	0.415778	0.369706	0.376976	0.307091	0.314148	0.319687	0.559793	0.8084	0.796486	0.800123	0.820952	0.810231	0.783398	0.731224	0.737693	0.749242
cg07095346	ITIH4	GGTTCTGGGAAATTGGGATCTACAAGCCAAAAACCACAGTGACCTCAGATAAGCAAATGA[CG]AACGTCCCATGGACCTTGGCTGGGGGCAGGAATGTATACCAAAGAAAGGTAGGCTCAGTT	0.284815	0.352464	0.237718	0.298574	0.313617	0.581172	0.49931	0.482791	0.700172	0.378673	0.307598	0.277936	0.287858	0.321446	0.546316	0.833962	0.834197	0.859113	0.852011	0.827992	0.841216	0.853086	0.772353	0.865028
cg16945186		CGCTGTTGGAATTTCCTCTCCCCCGCGGTTTCCCTCGCGGTTCAGATCGGGACCAGAACG[CG]ATCAGCTTCAGTGCCCCGCCGCAGGCATTTTTAAATAGAGTATTGCGTCCCCCATTCAGC	0.556983	0.570813	0.466393	0.527626	0.582607	0.904881	0.827678	0.827426	0.899058	0.719738	0.553042	0.469274	0.529908	0.513181	0.931162	0.0714456	0.0715332	0.0759691	0.0724111	0.0811005	0.0781161	0.0856283	0.0934479	0.0759908
cg03785076	SNED1	CCAAGTCTAAAGGGTCATGAACCTCTGAGTGAAAACACCAAGTGCAGGATCTGTGAGAAC[CG]GCAACACCCAGTCACACGCAGAGAACCCTCCGCTGCTTCTTAAAAATAACATTGACTGTG	0.130267	0.278259	0.221492	0.181507	0.193673	0.36225	0.404227	0.557765	0.404131	0.458539	0.249657	0.22749	0.138508	0.15992	0.524265	0.833804	0.814177	0.813965	0.797793	0.822002	0.797858	0.815947	0.752748	0.835628
cg19164987	HOXC4	CATTTTCTCTCCCCCTCCCCCACCCCCCCACCCCCAGTAGGACTTGTGTGTCGGCAGAGG[CG]TCTGACGAGGGGCTAATTTCGCTTTCCTTGTTTACGATCGAGAAAAGCGCTTGGCTCTCC	0.597525	0.687447	0.558764	0.627941	0.705379	0.948434	0.808445	0.790159	0.92744	0.96486	0.685008	0.603394	0.657061	0.673598	0.969649	0.0467984	0.0457177	0.0450361	0.0434724	0.0514445	0.0501084	0.0395854	0.0516892	0.0510207
cg04988514	GRIN2D	CACTCCCGCGTCCCACCTCCACGCCCGGGGCCGTGGCCCCCACATCACTGTGCAGCTCCC[CG]GCCCCAGCCGCGCCTCCGGGGAAGCCCGTTTTTAACCTTTCATCCATTGGGACTCAAAAC	0.231846	0.354312	0.30556	0.194038	0.195366	0.537946	0.549912	0.718282	0.632444	0.745943	0.326998	0.297972	0.158214	0.259554	0.403171	0.861478	0.853028	0.835209	0.847923	0.880481	0.884714	0.939374	0.927642	0.935612
cg23896972	ORAI1	GCACCTGTTTGCGCTCATGATCAGCACCTGCATCCTGCCCAACATCGAGGCGGTGAGCAA[CG]TGCACAATCTCAACTCGGTCAAGGAGTCCCCCCATGAGCGCATGCACCGCCACATCGAGC	0.690896	0.667558	0.695502	0.667518	0.696769	0.907855	0.889917	0.89198	0.908668	0.599395	0.664443	0.707319	0.630134	0.673643	0.870743	0.869216	0.862547	0.891429	0.881461	0.880428	0.876283	0.882262	0.864642	0.858454
cg06801852	JAG2	CAGCTGCTGGCGCTGGTATGCAAAGTCCGTGATGCCGGTCCCTGCGCTTAGGCACAGGCT[CG]ACGTTTTGCACAATAAAAGGTGAACGGGTCCTCCAGACCCCACCTCTCCCGCCTCGGGCC	0.45463	0.436353	0.51797	0.440435	0.503133	0.834727	0.765284	0.743047	0.894852	0.541965	0.442505	0.558124	0.40975	0.491802	0.167856	0.892224	0.91308	0.917049	0.915031	0.903941	0.897291	0.882058	0.859991	0.920312
cg02102332	RAPGEF6	TGAAAAATGTCAAGTTTACAAGTAACTACCAAAAAAAGCAGAGAGAAAAAGTGACATGTC[CG]AGAGAAAAACTGCTGAGGGATTCCAAGGAAGGAGACATTTCTTCTTGTTGGAAAGACATG	0.450814	0.496874	0.499145	0.434697	0.439715	0.862533	0.677889	0.821723	0.86341	0.895793	0.541873	0.465576	0.455154	0.466858	0.886745	0.83697	0.845098	0.850537	0.838206	0.82174	0.842935	0.837044	0.802574	0.864396
cg02971546	SH3TC1	GCTGAGGCTGGCAGGGCTGAGGCAGCCGGTGGCTGGTGGACTTCCCCAATCCCAGCCTGG[CG]GGGGACTGGGTGCCCCTAGCCTCTACTACAGAGCCTGGGGGCTGGGCAGCGGGCAGGCAG	0.275276	0.36454	0.264844	0.221314	0.275337	0.484378	0.506117	0.417606	0.571698	0.429418	0.405263	0.299552	0.227272	0.332899	0.23637	0.815966	0.834674	0.833619	0.818424	0.833549	0.796446	0.826843	0.776445	0.820192
cg03885270	PIP4K2A	TTTCTCTCTTGCATGAGGTAATCTGCTGCGGTGGGTTGGATTCCAAGTGGCATTCATCTC[CG]CTAATGTGACGTGTAAATGCACAAACACAGCCACAGGCATCAGCAGAGGGACGCCGTTCC	0.341176	0.365571	0.281228	0.339067	0.347108	0.486397	0.571861	0.620206	0.47123	0.610016	0.32551	0.287363	0.317242	0.340283	0.53671	0.817271	0.820229	0.833578	0.835231	0.818452	0.823644	0.8107	0.740714	0.843815
cg15929276	FKBP5	AGAGCCTGGCTATAACCAAGCAGTTTCCCAGGGACACCAACACCCACAGACAGGGCACCT[CG]ACTCCAGACACCATGTGCCTCTTGCTTCCCGGATTCATGGAAACACAGAGACCAGGGATG	0.344165	0.241535	0.269322	0.279475	0.200763	0.500996	0.660737	0.514232	0.675439	0.243544	0.216874	0.226827	0.306514	0.175216	0.215795	0.798653	0.782227	0.723747	0.804731	0.767912	0.78223	0.809235	0.762874	0.795465
cg25532627	TBC1D16	CAGGCCCCTCCAGGACGAGGTTGGAGGACCAAGCGCAGAAGGTAAGGACGCAGCCCTCGG[CG]AGTGCGGGCGGGGCCCAAATCCCTCGCCGGCCGGCTAAGCAGAAGCGGCTTTTGGCTTTC	0.22147	0.361174	0.365743	0.327957	0.293189	0.547945	0.576295	0.648038	0.522848	0.365759	0.349029	0.358457	0.367209	0.330241	0.490961	0.891104	0.859583	0.901337	0.896734	0.910907	0.894004	0.867775	0.890469	0.912431
cg26964651		ACCCACAAGGTCTTGTGGAAAGTCACTAACTTAAACATGATTATTCAGCTTTTTTTGTTC[CG]TGGATGTAATTATACAAAGAAACCATCTGAAATTCTAAGAATCCATTTTTTCTCTACAAA	0.470533	0.497173	0.389519	0.418204	0.423918	0.531604	0.695492	0.669328	0.731115	0.855255	0.487706	0.455968	0.479187	0.434242	0.789892	0.897802	0.86383	0.875104	0.853652	0.891503	0.867944	0.893635	0.852264	0.89655
cg10852861		GGCTCCTTTCTTCCACGTCTAGGACCTGATGGCTTTCTCCTGAGCAGATTAAAATAAAGA[CG]CGGAAGACAACTGGAATCAGGAGAGGGAGGGAACCACTGGATCAAACGCAGGAGGATTGG	0.700518	0.737355	0.741434	0.583145	0.70829	0.897499	0.907074	0.893863	0.888541	0.681168	0.732797	0.73561	0.59114	0.687553	0.902997	0.0693416	0.0638276	0.0663182	0.086723	0.0768622	0.0717737	0.0830726	0.097636	0.0828346
cg20307896		CAATTGCGCCGGGCACTAGGGCGCAAACCCGGATCCTGCGCGCTGGCTTCTGTTACCTCC[CG]GCTTCGACTTCGGCTGCTGCACACTCGTCAAAGTAATGAATGGAGAGAGAAAAGAAGAGG	0.499231	0.592273	0.556768	0.523835	0.552933	0.879044	0.722407	0.884051	0.85896	0.697174	0.642881	0.60787	0.502615	0.397801	0.490012	0.115298	0.125971	0.13441	0.148935	0.12676	0.121344	0.132874	0.186126	0.128976
cg00500359	OSBPL5	TCCTGGCCTCCCCGCCCACTTTGCCGGTGGGACAGAGTGGCTGACGGCGTGTGGCACAGG[CG]GGGTGAGCCCGGAAGGGTGAGCATGCGCCTGCTGACGCTTCGTTCACCAAGCGGGGGGCC	0.469374	0.407712	0.414536	0.330947	0.352303	0.694356	0.884874	0.785331	0.981965	0.88342	0.412569	0.430018	0.396928	0.30723	0.925862	0.958839	0.945267	0.945401	0.947197	0.948428	0.943432	0.948676	0.903266	0.939681
cg13800491	FLT1	TGCCTAGGGCAAAGGTCAAGATCTGGTTGACAGGGCACGAGACATAACTCGTAAAATACT[CG]GTAGAGAAGTCTGGTAGACCTTCGTCTGGTTATGCAAATGGACACGAACAGAGAAAACAC	0.206725	0.277066	0.202619	0.316983	0.274668	0.391875	0.573428	0.539872	0.45528	0.230327	0.328332	0.214684	0.331547	0.261233	0.200866	0.876472	0.853562	0.860693	0.860286	0.884589	0.853341	0.880066	0.78168	0.878265
cg05222995		CTTTGTCTCTGCGTGCCCGGCGCGCCCCCCTCCCGGTGGGTGATAAACCCACTCTGGCGC[CG]GCCATGCGCTGGGTGATTAATTTGCGAACAAACAAAAGCGGCCTGGTGGCCACTGCATTC	0.577886	0.711192	0.684358	0.61774	0.691094	0.921108	0.92251	0.828529	0.947072	0.939483	0.70929	0.668921	0.624212	0.647764	0.957975	0.0657142	0.0656563	0.0700868	0.0664323	0.0712862	0.0812246	0.0720964	0.125232	0.0609114
cg03934354	C1QTNF3	CGCTACGGCCAGTCTGCTGGTGGCTTTGCACTATTCTTGCCACCACTTTATTAGTTCTTC[CG]CTCACCTCCATGTATTCATCTTGACACAGGCAAAAAGGGAGGAAAAACAAAGCCAGCAGT	0.525965	0.578571	0.516953	0.561223	0.564489	0.801386	0.73892	0.786312	0.785895	0.824372	0.591918	0.549827	0.586693	0.564814	0.723414	0.844881	0.85415	0.838339	0.837997	0.848961	0.825634	0.840892	0.810511	0.834898
cg18698767		GAAACTTCCTGCAGAAGAGGATCTGGAGGCGCATTCGGCCCACTGCAAAGCCACACACGT[CG]GTGAGACCAAAGAATTTGTCACCTCAGATTCTTTCGTTAACAGACAGATTCATTATGTAA	0.548629	0.558345	0.524297	0.605854	0.559674	0.761518	0.798421	0.863936	0.713956	0.534137	0.535707	0.53871	0.561428	0.519971	0.361674	0.891949	0.906989	0.889031	0.885592	0.900616	0.893483	0.897261	0.854459	0.880436
cg18338984	IQCE	CAGCTGGTCTGCTGAGGTCTCAGCCAAAGAGTGGCCACCTCCAGGAAGCCCGGGCTGTGT[CG]GGACGGAAGGGAGGAGTGTCCCATCTGGAGCTGCCTCTGAACTAAGCGTCGCCTTATGCC	0.286018	0.296694	0.343979	0.216204	0.270265	0.497718	0.622796	0.550027	0.547859	0.588931	0.306662	0.392429	0.259692	0.264931	0.522862	0.836844	0.814027	0.839536	0.809754	0.822692	0.831421	0.791933	0.740369	0.817281
cg08288345	BAT1	ACATTGGGCATGTATTTAGAGAAGCGCTCATATTCCTTGCTGATCTGAAAAGCCAACTCC[CG]AGTGTGACACATCACCAGTACAGACACCTTAGGCAGGAAGTAGACGGAGACATATGGTAA	0.461881	0.42517	0.50371	0.48959	0.413815	0.76922	0.767779	0.598742	0.838611	0.36177	0.421754	0.529037	0.498763	0.409287	0.555096	0.82871	0.845979	0.806127	0.845179	0.847193	0.86102	0.851021	0.823614	0.854664
cg16157895	ITPK1	CTCACCTGCCTGGTCACCTGAGGACAGTCTCTGGAGGCCGGTCAGTGGAGGTGGCCTGGC[CG]CCACTCACCTGGGAAGGCATTGATGTCAATGACGGCGTGCTGCCCTGTCTGGTTGTTGAT	0.406157	0.506726	0.461633	0.413435	0.440617	0.588607	0.795052	0.624846	0.684419	0.819549	0.500086	0.48651	0.385688	0.48721	0.7935	0.836876	0.851708	0.846531	0.857766	0.859683	0.849165	0.860154	0.823146	0.851192
cg26325286	LOC154449	TAAATCACAGTTTCTAAAGCTGTAGCACTGATTGCAGCGAACCCTCCAGACTGGGCATCA[CG]CGTGCCCGTCAGGAGCAGCAGCCGCTGAGACTGTGATTCTCCTGCAGCTGTGGGGAAACA	0.468048	0.539098	0.551299	0.537371	0.529996	0.781983	0.832826	0.78388	0.601297	0.487728	0.507877	0.571627	0.535981	0.49683	0.512978	0.859317	0.853878	0.861529	0.858963	0.865662	0.841229	0.859326	0.834169	0.866782
cg14947429	MKX	GTTTACATTTTTGCGCACCAGGAAGATACAAAGTATCATTGGAGCACGTTCTGATGTCCT[CG]GTTCTCTTTTGTTATATAACTTGCTGTTGCAGCGCTTGCATCTTGTCTTTGGCGCTGCCC	0.563035	0.615513	0.566737	0.668067	0.60237	0.850191	0.800204	0.848203	0.890101	0.481264	0.645785	0.665382	0.668078	0.567562	0.584277	0.253227	0.18715	0.240173	0.203308	0.247757	0.204914	0.216148	0.196144	0.192134
cg05224126		ACAAGCTTCATTCATGATGGGGGCGGGGCTCGCGGCCCGGGGAGGATGGCGTTGGTGTCG[CG]TCGGCTTTAGCTCTTACCCTGGACCCTGTCTCTTTACATCACCATTTTGGCTGTGTTGAT	0.338684	0.374855	0.301913	0.385511	0.342335	0.930542	0.68269	0.796155	0.90202	0.498898	0.346691	0.361607	0.368313	0.285664	0.469668	0.903744	0.928847	0.890223	0.9233	0.907727	0.944949	0.910317	0.807346	0.939576
cg09851951		TCACCAGGCCCGCTTCCTGCCCCCTCCTCGCCCAGCCTCACGGTGCTCACACGTCCCCGT[CG]AGGGGAGCCGCGGCAGCCCTCGGACTCCCAGCCCCGGCTCATCTTCTATCCTTCCCTCCC	0.437654	0.510524	0.553066	0.450094	0.518733	0.762221	0.730009	0.761859	0.914752	0.59605	0.533961	0.516818	0.484492	0.531392	0.655915	0.055431	0.0548621	0.0462953	0.0517721	0.0600612	0.0479429	0.0524778	0.0511439	0.0421583
cg15362957		GGGGAAACTGAAAGAAGATCCAGAAGGACGCGCCCTAGCTATGGAGGCTTTGGTGGCATC[CG]AAAGGGGAGGGGGTGGCGACCTGCATTAGGCCCCCTCCTCTCCAAACACCTGCTGCTGGT	0.346227	0.374506	0.348605	0.402288	0.356305	0.605355	0.688891	0.544879	0.552712	0.364625	0.353798	0.369408	0.41261	0.336668	0.334533	0.119971	0.131545	0.131195	0.114717	0.129606	0.118538	0.12942	0.139902	0.116413
cg16904445	IGF1R	AGATTTACAGAAAAGTTGCCGCGATAGTCTAGAGAGATCCCATGTACCTCTTAACAGCTT[CG]CCTCTGTTAACATTCTGTGTCACCATGGTAATTTGCCACAGCTAAGGAACCAGCATTAGT	0.614034	0.641769	0.581795	0.580874	0.638306	0.72122	0.870091	0.77416	0.885556	0.888849	0.6604	0.582103	0.604069	0.655886	0.906869	0.904425	0.892574	0.901862	0.898238	0.895309	0.87956	0.909051	0.88497	0.901593
cg11394785	LTC4S	CGTTCCCCAGCTCGCCTTCACACACAGCCCGTGCCACCACACCGACGGTACCATGAAGGA[CG]AGGTAGCTCTACTGGCTGCTGTCACCCTCCTGGGAGTCCTGCTGCAAGGTGGGCTGGTTC	0.368996	0.402809	0.31396	0.339427	0.368168	0.562717	0.579086	0.617228	0.587244	0.421954	0.379747	0.352475	0.355129	0.370156	0.55858	0.730444	0.738925	0.721887	0.737992	0.753612	0.72814	0.734705	0.683592	0.725568
cg05423304	FBXL13	TGGAGTGGGAAGACAGGCCAAAAATGAGGAGGCAAGAGGTAACAGCAAGATAGAGTGACT[CG]GTCTCAGTGGGGCAAAGGGCAGATTGATGCTTACCTTTCAGGAAAGCTGTGGCATCACTG	0.315424	0.419456	0.331596	0.326486	0.300707	0.736182	0.519687	0.561311	0.635813	0.305199	0.44399	0.351713	0.329234	0.401488	0.300003	0.848094	0.831245	0.85372	0.838676	0.819752	0.835614	0.824852	0.769919	0.824549
cg13996003	MXI1	CTTTCCCCAACCTTCTTTCCCTTCTTTTACTAGAGGTGCAGGACCATGCCTTTCATGAAT[CG]TTATTCTCTATGTCAGCTCTTCTCTCCCTTGGAGACTTGAAAAACATCATCATATGATAC	0.398629	0.440127	0.432613	0.482825	0.369041	0.830609	0.626301	0.707484	0.78376	0.675542	0.449965	0.386845	0.475048	0.419478	0.793646	0.809722	0.809465	0.810225	0.855615	0.836513	0.79007	0.841347	0.87042	0.822701
cg13697378	DIRAS3	ACTCATGACGGAAGTTGCCGCTCGCCCACTTGTGCAGCAGCGTACTTTTCCCCACACCAG[CG]GTGCCGACTACCACGACGCGGTAATCTCTGATCTTCCTGTGGGGCTTGAAGGCGCGGAGG	0.66787	0.650519	0.680811	0.618812	0.617003	0.913026	0.907527	0.840675	0.951409	0.891594	0.624021	0.688264	0.62806	0.585351	0.837604	0.599086	0.63939	0.644738	0.693632	0.677246	0.507885	0.926045	0.911849	0.917049
cg12354122	ALDH1A3	AGCTAGACTTACCTCCCCCTCCTGGGAAGTAATGCGCGACAAGAATTTAAACTCTTAAAA[CG]ATTAGCAGCAAAGGTCTCATGTGCTTTTTTTTAATTATCATTTTTTAATCGAGGTATAAT	0.580247	0.674241	0.686633	0.601582	0.576818	0.888162	0.732243	0.861764	0.840943	0.665223	0.682473	0.68029	0.629421	0.58972	0.624726	0.139478	0.164405	0.187404	0.165913	0.199503	0.146986	0.154211	0.13881	0.149865
cg14486346	CREG2	CCTTGGCTGTCATGTAGAAGAAAGGAATCCCAGTGCTATTGTTGAAGGGGCCATCACTGA[CG]GGCAGGCAGTTCCCAAATGGCAGTCCTTGGATCTAACAAACACCAAAAAAGGCTTTTTCA	0.418947	0.44239	0.404705	0.404618	0.368426	0.65985	0.517733	0.827697	0.700614	0.383854	0.413052	0.448311	0.430535	0.427974	0.65963	0.763033	0.769773	0.767709	0.773632	0.780543	0.765173	0.687707	0.718342	0.745339
cg01939535		AACTCTCACCTCTGACTGACCGTCAGCTTTCATGCAAGCAGGAAGTGAAGGCTAAGGTGG[CG]TTGTAAACTACCTCGTTAAGCATTGAAGGGGTGCCAGAACACATAGCTAACTGGCAAAGA	0.454871	0.410164	0.408192	0.458672	0.511622	0.869944	0.650559	0.807804	0.631501	0.458989	0.437416	0.423929	0.467777	0.429845	0.809073	0.83958	0.844168	0.865181	0.844148	0.840788	0.837236	0.866864	0.82977	0.860988
cg03157509		TCCCGGGGTTGAGGCTCTCACCGGAGAGGGGCCCTGGGAGATGAGCTGGGGCACGACCCC[CG]CCCCGGGCACCGAGGGGGGCTTCCAGGTCAGGGTCGGAGAGGCTTCGGGAGGACGCGGCT	0.532017	0.573106	0.511929	0.567547	0.509109	0.819469	0.726812	0.752656	0.810636	0.81677	0.561692	0.530549	0.547137	0.546662	0.829417	0.887038	0.865664	0.897506	0.875514	0.88159	0.871478	0.877762	0.834078	0.885769
cg12363726	BAIAP2	CTTGCAGAGCCCTGGCAGTGCCTCTTGGAACGGCTGTGCTGTGGCCTGCTTAGTGTCACC[CG]CGATGCGGCTCAGCTGTTTGGTTTGGTTTGGACATTGCATCGCCTTAACTGCAGTTCTGA	0.256946	0.389555	0.277275	0.266868	0.348027	0.517219	0.619418	0.51748	0.678056	0.442301	0.356998	0.314256	0.275952	0.342581	0.693	0.85293	0.859272	0.861325	0.882875	0.849421	0.864993	0.86592	0.818724	0.850914
cg15936999	UNC13D	CTGAACCCTGAGAGAAGCTGACCTGGGCCCGGGGGGGTTCTCACCCCACTTCCTCGAGTG[CG]TCCAGACGTGGGGCGGGGCGGGGTGGGGTGGGGTGTGGTGGCGCCCAGGGTGGGGGCTCC	0.338674	0.384979	0.289385	0.287422	0.30722	0.57071	0.504215	0.527426	0.513189	0.532933	0.344334	0.3313	0.285954	0.306388	0.539289	0.889743	0.888421	0.898118	0.872901	0.885546	0.873933	0.878827	0.771671	0.807879
cg17890764	ITIH4	CTGGGAAATTGGGATCTACAAGCCAAAAACCACAGTGACCTCAGATAAGCAAATGACGAA[CG]TCCCATGGACCTTGGCTGGGGGCAGGAATGTATACCAAAGAAAGGTAGGCTCAGTTTGGA	0.221439	0.24695	0.167443	0.196026	0.181831	0.411461	0.333619	0.386453	0.555571	0.247609	0.176721	0.184617	0.211815	0.18198	0.442312	0.796165	0.761989	0.794193	0.777563	0.758176	0.771256	0.792819	0.658174	0.779321
cg00401091	NFATC2	ACCCTCCACGGGTGAGTGCGACACGCGCTGCGCGAACCAGGGTCTAGACAAGAAAGCTGC[CG]CCACTAGGACTTTTGCCCTAAGGGACCCACTGGCCCCACACTTTTTCCTGCTTTTCTTCT	0.667477	0.64157	0.639445	0.745224	0.637349	0.964966	0.837559	0.888763	0.927045	0.803829	0.603963	0.667527	0.722725	0.570958	0.617472	0.24433	0.216901	0.250445	0.284077	0.266276	0.260745	0.234417	0.202368	0.159316
cg06685411	BLVRA	CCTTCCTCAGTCTAGCTTCCTTCTAGGTTCTTACAGCTGCTCCCACCATGCTGTTTCCCA[CG]GGTAAGATGCTTCCTCTTTATCAGTCTAGCTCTAGAGTAGACAAAAACACCTCTCCTTGG	0.492341	0.512941	0.531384	0.494909	0.501238	0.697172	0.597072	0.776114	0.824576	0.442254	0.560506	0.551016	0.503627	0.485491	0.479354	0.72503	0.71005	0.74083	0.731318	0.733703	0.707125	0.717151	0.681748	0.704086
cg27179041	PTPRG	ATGAGCTTTGGGTATTTCTTTCCACAGCCGGGACTGATCCAGCCTGTGCCTCCTCTCTGG[CG]TAACCTCATCCTGTCCTTCCTCATTTTTAACACCCAAGTGCAGCTGCAGGGGCTTTCATC	0.280356	0.345388	0.211853	0.270687	0.343987	0.527154	0.523008	0.650147	0.510475	0.482702	0.311632	0.250889	0.288933	0.348513	0.594975	0.839475	0.802978	0.817993	0.821113	0.812417	0.810985	0.821637	0.783115	0.84484
cg00691830	MEIS2	AAGGCTGGACCTGCTTGGCGAAGACCGCGATGTCCTCGTTGAAGGAGTCGGAGGAGCAGA[CG]TCTCCGCCAGCCACTCCAGGTTCCCGGGGAGTGCAGGTCGCCAGCTCGCACTTCTCAAAG	0.547738	0.655977	0.612589	0.66058	0.643424	0.843472	0.877612	0.883748	0.920241	0.794604	0.701545	0.626172	0.666567	0.622	0.913697	0.17151	0.16513	0.168152	0.125139	0.164479	0.186896	0.200358	0.203715	0.159978
cg25840536	RBPMS2	GCGCTGTGGAGAGGTGAACAGAACGGGCAGAGAGGGCTTTCTTACGACTGTTGGCCCATC[CG]AGAAGGCAGGAGCGGAGGAGCCCCATGTGAAATGAAAAAGCAAACCCCATCTATCTGTTG	0.466929	0.521464	0.535915	0.520352	0.539654	0.770556	0.696498	0.744134	0.755761	0.456945	0.562151	0.556177	0.544527	0.511052	0.49341	0.798449	0.791978	0.779878	0.772457	0.797222	0.796696	0.785219	0.777907	0.78304
cg09559189	EBF2	TGGGCTCCATGCGATCCCTGAGAGTGATCATGGCAAGGTCAGCGCGTGCGGCCCGGAAGC[CG]GCTGCTAGGCGCCGGCTCACCGTTGCTGTAGAAGAGCTCACCGTTGCTGTAGAGGAGCTG	0.706559	0.661274	0.74933	0.847224	0.765675	0.937202	0.94747	0.949844	0.956734	0.954574	0.685195	0.756477	0.842841	0.734017	0.952273	0.046628	0.0530593	0.0525037	0.0417091	0.0495901	0.0405421	0.0449604	0.130449	0.0540438
cg23051392	C1QTNF3	CCATTCATCATTTTCCCACACCACAAGCAAGAACGATTTGTGTGCACAGTTCCCAGTTGG[CG]AAATTCATAAATGTCACACCTTGGCACGTTTCTGTTGAAGTGTGAAGAAAACATACACAA	0.436857	0.535072	0.456913	0.455853	0.419658	0.628892	0.672612	0.711443	0.693813	0.503059	0.541181	0.46909	0.478996	0.478436	0.637163	0.87082	0.861291	0.8447	0.855195	0.863121	0.878735	0.88656	0.846905	0.874002
cg07706387	C1QTNF1	AGAGGTAAACACACATCACTCATCAAATGGGAGCCACTCTGCCCGCCTCCTGCCCATCAC[CG]GAGGAGTTTGGTCATTGGGCAATTAGTGTGATGAATGAATGGCTTCTGGCAGGGAGGAAA	0.328145	0.410884	0.354636	0.30694	0.373582	0.67021	0.799941	0.797999	0.839171	0.83124	0.418496	0.368945	0.310792	0.39687	0.817044	0.763857	0.749572	0.746183	0.736413	0.752086	0.763943	0.765061	0.714231	0.752541
cg22486621		TGACAATCTCCTGTGCCCTCCGCCTCAGCGTGTTCTGCTAAGGGTGATATACTATCCATT[CG]GAAGCTTAGGCGGGCACATCCTGCTGCTTCATGGGCTGGGATGGATGAAGTGTTGCTGGA	0.313634	0.38018	0.41272	0.290864	0.285871	0.572688	0.781743	0.830872	0.890498	0.77716	0.364633	0.382733	0.303925	0.350633	0.89014	0.810561	0.797638	0.791238	0.779486	0.822051	0.784209	0.851566	0.820712	0.86485
cg22497575	TSC22D1	TGGGCAGAGAAGAGAGAGCTTTGATTCTGACATGAGAGTCAAATTTCAAAATGCAAAGAA[CG]AAGTGTTTAAAAAATGGTAAGTGACTGTTTAAATGACCAAAATTAACTGGAAAGCGATGG	0.380138	0.423469	0.373186	0.295352	0.397377	0.671429	0.630268	0.807621	0.743695	0.69669	0.429078	0.420094	0.32385	0.412451	0.868831	0.846659	0.815026	0.839025	0.816328	0.827198	0.848867	0.849235	0.795876	0.853118
cg11113363	PRDM16	ACCCTGAGGAGTCCGCCCTGTTGTTTTGGCTTTGTTGTGACAGGGGGTGGATCTGCCTGC[CG]TTCGCAAGCAACGCGGGTGCAAAACAGCCAACCTGGGTGCAGACCTCAGGGGCCTGCGGA	0.64078	0.67135	0.660058	0.673299	0.651707	0.862449	0.845458	0.811858	0.923608	0.907414	0.669789	0.691281	0.643459	0.675108	0.912071	0.873543	0.869386	0.881208	0.859162	0.857246	0.856679	0.83451	0.837959	0.872569
cg11984971		ACAGGACTGTGCCAGACAGCTGGGATGAAGAATGACCATCTGGGCAAATCCTCCTTGGAA[CG]CAGATCCTCTTGTTACGGTCTCAGTGGAGGAAGTCAGTACCATCTCTTTCATAAATCTCA	0.261389	0.402802	0.255582	0.276084	0.346923	0.884989	0.693156	0.647144	0.622323	0.676608	0.351878	0.267565	0.294995	0.36761	0.728924	0.904486	0.905646	0.852924	0.882149	0.890785	0.888678	0.902692	0.85267	0.881795
cg05003599	FBXO24	ATCAGGATGGTCAGGGGAAGCCAGAGACGGAAGCTGCAAAAATTCACCAGGCTGTGTGGA[CG]GGAGGAGGGGCTCCGGGTGAGGGGGATTGGCCGCAGGAGATCGGGAGGAGTTATTTGGAG	0.587106	0.566978	0.555386	0.534314	0.550737	0.67604	0.81779	0.866112	0.891208	0.778613	0.596307	0.66561	0.567325	0.533344	0.857172	0.326377	0.259567	0.294925	0.327419	0.335993	0.355062	0.291053	0.325852	0.340682
cg16145216	HIVEP3	TTCCCGCCTAAGAGCAGCGGCAGTGGCTCACCTCGGGAGCTACAGGGGCGCTCCTACAGC[CG]CTCCAGCATCACAGCCCATTCCCTCCCTTGCCTAGTCCTGCCAGGCAAACCGTGAAAACA	0.48007	0.503395	0.512106	0.442917	0.423672	0.797024	0.788151	0.707206	0.79747	0.875011	0.494636	0.551619	0.418878	0.41036	0.898432	0.0932748	0.205262	0.0968324	0.350232	0.279506	0.0962756	0.0962917	0.130573	0.0767186
cg12931554		CATCAGAGCCAAGCTGGGGCGTGCAGTGCACCTGCCTGTCAGCCGGCTGGGGTGCTGAGG[CG]TCGCATCAGAATTGCAGGATGCAACACATCTGCCTGCATGTCAGCCGCTGGGAGAGATGC	0.502928	0.543716	0.527613	0.483026	0.523119	0.833451	0.741977	0.828937	0.877738	0.861701	0.545175	0.542038	0.508413	0.574669	0.864398	0.831359	0.840911	0.865885	0.817736	0.835289	0.810069	0.846267	0.780546	0.841171
cg12047941		CGAGGGCCCCGGGATCCCGCAGTCTTGAAATGTGACGGGAAGTCCGAGGCATCACGAAGT[CG]GAGACGCAGGGCGCGTCGTGGGTCCCGGGCGCCGAACGCCAGCTCGCCACGGCCCAGCAG	0.695295	0.633841	0.655699	0.662352	0.611294	0.734001	0.925279	0.884809	0.964605	0.917747	0.656101	0.70403	0.670171	0.547929	0.78232	0.339896	0.243018	0.507286	0.612691	0.248629	0.427784	0.215256	0.0940493	0.0810492
cg01156077	LOC100132215	GCCTGGCCGGGCCTGGAGGTCACCTGGATGCTGGATCCTTGTCTCCACACCCAGCTCCCT[CG]CCCCTTCCCGGCTCGAGGGCCTTGAGCTGGACGGCTTCACCTCCTCCAGTGGTGTCCCCA	0.475552	0.513732	0.439563	0.433215	0.418946	0.748975	0.717511	0.784875	0.657076	0.378658	0.480585	0.485054	0.408544	0.43191	0.574595	0.106925	0.118013	0.106759	0.115923	0.124362	0.108209	0.116225	0.12905	0.103916
cg03519011		ATGTATAATCTCGGGACAGGATGCAAATCGTCTCTCCCAGGTCCAGTGAGCCTGTGACCT[CG]GAGGTGGGACACATCACGCACTGCGGAGTGTGGGAGGGGTACCTGAGATACTGAGGAGAG	0.275343	0.245003	0.323718	0.301206	0.204085	0.515626	0.466938	0.521439	0.517966	0.194303	0.258892	0.324953	0.325186	0.212585	0.170598	0.77767	0.785293	0.787677	0.782216	0.765696	0.749793	0.759906	0.689666	0.721883
cg01912455	SMARCB1	TTTACTCCCTGCATTATTCAATCATGATTGCTTTCAGACTTTCATTAGTTTCACTAGCTT[CG]CGCTGTAAGAGCCAAGAGGCAGAGCCACAGGGCTGGGCTGCCTGGTTTCACTCCCCACTG	0.375619	0.509711	0.414205	0.397255	0.4473	0.703433	0.614973	0.656422	0.808097	0.583821	0.500258	0.411228	0.419212	0.455713	0.482349	0.886666	0.894723	0.88872	0.84949	0.876536	0.876512	0.88016	0.871302	0.902198
cg04119984		GTCAGAGCCGGGTGGGCACGGGGTGGGTGGGGCAGGCCCACGGGGCTCAGTTCCACCGAG[CG]GAAAATCATCTGACGTGTCCTCGGTGTATGTGTCTGGAGCAGAAGCAGGTCAGATGTCGC	0.517742	0.512076	0.54676	0.513672	0.444016	0.826216	0.680849	0.839041	0.709772	0.586707	0.520128	0.560504	0.533428	0.464932	0.659488	0.841504	0.840931	0.84295	0.84085	0.821339	0.843605	0.853024	0.830889	0.838033
cg04313756	TCL1A	GCACCGGGGTGACCTTGGCCCTTTCTTCTTCTGGAAGACCCCCCCGCTTCCCTCGGCTGC[CG]GACCGGGACTCTGGGCCTCTGCTGGGAACTCACAGTCGACACCAGGATGCCCAGAGCCAG	0.322212	0.262196	0.236374	0.244957	0.388668	0.549605	0.545574	0.759745	0.544189	0.548984	0.264792	0.287544	0.271907	0.373748	0.58963	0.616586	0.53902	0.714982	0.695769	0.721421	0.612844	0.865892	0.837373	0.905173
cg23896164	SIM2	GGCAAATGCGCACGACCTACATTAATTTATGCAGAGACAGCTGTTTGAATTGGACCCCGC[CG]CCGACTTGCGGATTTCCACCGCGGAGGCCCCGCGCGCCGGTGCCGAGGGCCGAGGAGCGC	0.505344	0.560279	0.50492	0.571615	0.456894	0.783725	0.794683	0.722096	0.785765	0.53459	0.537187	0.547558	0.579779	0.469027	0.749512	0.120533	0.105582	0.0993202	0.11927	0.11307	0.123045	0.11193	0.129956	0.109077
cg06820990		GTCTCCTGACGTTTTATGGCACTTGACGCTGGTAACCACTCCCTTCCCGAGGACGGAGAC[CG]CGGCCCTGCCAGTATCGCTCACGCTTTACCTCTTCCCAAGTGTTTTTATCTCCTTACCTT	0.58142	0.631794	0.609555	0.558518	0.57594	0.90669	0.718527	0.74988	0.905973	0.812123	0.617521	0.642657	0.552652	0.574752	0.831916	0.884019	0.884465	0.893014	0.893305	0.898167	0.877728	0.891123	0.858855	0.908896
cg24437293		GCCACAGCGTGAACCTGGAGGACATCATGCTCAGTCACAGATGCCAAACTCAGAAGGCCA[CG]CAGTGTGTGATCCCATTTCTATGAACTGTCCGGGACAGGCCCATCCAGAGACAGGGAGGG	0.487635	0.450209	0.505481	0.454814	0.409987	0.593509	0.73815	0.635008	0.776916	0.58389	0.461665	0.53518	0.462719	0.427355	0.807489	0.782959	0.8076	0.798726	0.802932	0.80976	0.790878	0.822251	0.779954	0.801488
cg03607680		CGCCTGTGTCGCTGCCTGATCGAGTGACGGGCGAGGACATACACACTGCGGCCCCCAAGG[CG]CAGCCGCCCAACCGCTGCTCTTTTAGGAAACGTGCACTTGCGCTCGCGGAGGCCAGGCCA	0.608356	0.648252	0.805018	0.65139	0.708068	0.93201	0.973986	0.961711	0.950028	0.964081	0.627621	0.819558	0.648781	0.611173	0.961787	0.0416719	0.0418582	0.0297861	0.0377864	0.0352382	0.0355471	0.0427221	0.0515549	0.0420431
cg19781637	LHFPL2	TAAGCCGGCACACTATGCTACGAATTACAGCATGAATCCATGCAGAGTCAGTAATTAAGT[CG]GTAATTATGAGTTTTCACTGCAGAAGAACCCTGAAAGGCCCACTGTAAGAAGGAGCAAAT	0.235855	0.345182	0.230229	0.142227	0.231694	0.615248	0.601661	0.67404	0.723625	0.780938	0.300541	0.21193	0.201767	0.243354	0.818458	0.834215	0.849974	0.859997	0.862284	0.848653	0.849873	0.86361	0.829137	0.874728
cg03277898		CGAGGCAGTGCCCAGCATGGAGCTGGAACTCAGGGATGTGGGGGAAAAAATCCTGCCCAT[CG]CATAACAACCACCACCGTCTACTGAGAGCTCACGCCGGACCAGGCGGCAGGCTGAGTTGT	0.220161	0.364922	0.309001	0.142147	0.281964	0.446893	0.864608	0.641608	0.763564	0.623968	0.368039	0.291921	0.179769	0.28267	0.930466	0.966124	0.969364	0.973914	0.975606	0.967732	0.977674	0.976592	0.973293	0.971199
cg19156231	SCN8A	GGGCCGCCGGGACTCCCTCTTCATCCCCATCCGGGCCCGCGAGCGCCGGAGCAGCTACAG[CG]GCTACAGCGGCTACAGCCAGGGCAGCCGCTCCTCGCGCATCTTCCCCAGCCTGCGGCGCA	0.165874	0.139534	0.092925	0.10217	0.0713509	0.534153	0.301468	0.329199	0.305881	0.114253	0.118367	0.133076	0.100577	0.0941985	0.328056	0.451178	0.412119	0.468415	0.547452	0.532924	0.497368	0.746536	0.74736	0.929795
cg26620710		CGGGACCCGCCGGGTTTCCATATGAAGGGTCGAGCCGGCGCCTTGGGAGCGCTGAATGGC[CG]CTCGCGGTCCGGCGGGCGCGCACGCCCCGCGGCCCGGGCTGGATTTGGCCGCATTTGCAT	0.314056	0.354422	0.318152	0.366933	0.335855	0.775127	0.769208	0.670438	0.61236	0.362908	0.359459	0.330357	0.365202	0.353592	0.629311	0.116831	0.108869	0.0982388	0.101774	0.122409	0.120199	0.135873	0.118924	0.109043
cg19759671	MGC45800	ACTCTAGATTCTTCCCGCAAAGATATGCGTGCTGCTTTCCGTCACTAGCGCCCCGAGAGC[CG]GGTCGGGTTCGCTTACTACCAAGACTTCTCTACTTAACGCGCTGCGCTCGGGCACTTAGC	0.650483	0.63758	0.75595	0.791686	0.79437	0.96294	0.935091	0.957307	0.942415	0.845181	0.721728	0.735855	0.808136	0.806461	0.654527	0.0462451	0.0473063	0.0520302	0.0555205	0.055316	0.0539893	0.0491528	0.102929	0.0762519
cg01963906	SYTL1	AATTCCATCATGGTAGGAACGCGGTAGGACCTGCCTCAGCCAACTCGCGCAGCATCTACG[CG]GGCCACCAGCAGTGCTCCACTAAAGCTCACCTCCTGTCCTCAGTACTCCGTCCCGCAGGC	0.65843	0.707759	0.647696	0.620502	0.704306	0.89797	0.888343	0.910698	0.936218	0.923619	0.701161	0.639155	0.603419	0.667683	0.902953	0.219757	0.214459	0.239539	0.222899	0.212188	0.213284	0.254543	0.305191	0.320304
cg12033619		TAGGAGTGTTGGTGAGAAAAACAACAATAATTTAATCTCAGCATGCAAGGATTTATTCCA[CG]TACCAGAAAAGAGGAAGTATACTTTTGGAATTTGGCTTGAAAGTATTCTTCTTGTTGTAT	0.463023	0.442829	0.440263	0.448495	0.388232	0.828704	0.680466	0.65804	0.66783	0.287604	0.450629	0.411838	0.463179	0.346683	0.270411	0.860177	0.863956	0.874661	0.858787	0.845389	0.837321	0.854032	0.762431	0.849064
cg14722290	OSBPL5	GCTTGGATGGCTGTGCTGAGTACCTGGAACGGAGCCTGCGCCGCGGCGGGGCCTAAATGC[CG]TCTGGCCTTTTCCAGAGAAAGCGTGCCCGCCCTGCCCTGCTCTGGCTGGGCGTCTGCGGG	0.341039	0.351231	0.349051	0.187803	0.215819	0.57223	0.773087	0.691301	0.723916	0.809385	0.300615	0.393798	0.202517	0.321411	0.761482	0.961609	0.950097	0.962032	0.965506	0.951478	0.955894	0.963094	0.938167	0.962677
cg27621931	MIPEP	AAGGACTCTGGCCTTTAGCTTAAGATCAATGGAAGCCATTGAGGGTTTTAAGGGAAGGGA[CG]TCACACTCAAATCTGTATTTAGAAAAGACCTCACTAATGTTGTGTGGATTTGAGAGTTGT	0.519265	0.590232	0.558365	0.591505	0.566566	0.639719	0.874198	0.910726	0.890087	0.729554	0.604132	0.54054	0.582869	0.521843	0.839551	0.836301	0.826196	0.849075	0.834722	0.841744	0.820282	0.833443	0.813745	0.838558
cg23675587	RAD51L1	CAAGCTCCCCTGATCCTATGGCCTCATTCCAGTCACAGATCTTCCTGTCTGGAGCATTTC[CG]GCCCTTCTGTCCTTTGGCTTGGAGAGTTCAGCTCAACCTGGGAAGGGACAGAAGACTTTG	0.182543	0.191873	0.190929	0.1482	0.153115	0.539709	0.312048	0.320295	0.393511	0.127467	0.232402	0.212062	0.156596	0.225525	0.108049	0.732386	0.735452	0.74641	0.718901	NA	0.708819	0.727899	0.584663	0.724559
cg16316042	C1R	TGAGCTCTTCCACATTTGTGTGGCCCAGGAACACATCCAAAGAGGCGTTGCTTTGCGCTT[CG]TGTTCCTTGGGATACAGGGTGTGGGCAGCTGTGAGGATCCAGCGGTCGCCCAGCAGGGCC	0.501233	0.555645	0.516051	0.460513	0.501889	0.666284	0.783937	0.813414	0.660677	0.729209	0.565688	0.518293	0.481374	0.505444	0.614128	0.810226	0.811341	0.823589	0.820952	0.798512	0.796317	0.801381	0.79429	0.821823
cg03509898	ZFYVE21	GCCCTGTCAGCTGCTTGTCGGTGCCAGCACAGCCCGTCTGTCCTTGGTGGAGCTCTGAGG[CG]GCTCTCGCGTTAGATAAGACGTCTGAGCTCTTGTGTGGCTTGGTAATGCTGTGGCCACCT	0.439284	0.472851	0.374034	0.41291	0.480405	0.615133	0.705815	0.650551	0.677635	0.756226	0.447409	0.423972	0.420859	0.458874	0.626022	0.854607	0.858162	0.84309	0.853627	0.855886	0.826781	0.868538	0.806866	0.849258
cg01993468	LOC154449	TTTAAAGAGTTTTAAATCAGCAGTAAATCACAGTTTCTAAAGCTGTAGCACTGATTGCAG[CG]AACCCTCCAGACTGGGCATCACGCGTGCCCGTCAGGAGCAGCAGCCGCTGAGACTGTGAT	0.416997	0.359209	0.448883	0.393037	0.396279	0.680817	0.639129	0.70003	0.525894	0.35688	0.401519	0.440657	0.395509	0.383191	0.685845	0.79518	0.8316	0.826981	0.842016	0.818523	0.782104	0.817515	0.739196	0.828148
cg03912774		CGGCAGAGCCCTGTGCAGCCTGCCCCAGCCTCCCACGCCTGGAGCCGGCGCTCCTGTGCC[CG]CTCCAGAGCTGCTTGCGCTAACTGGCACAGGCTGGGCGCTCCCTTCCTCCGCCCTCCCGG	0.142899	0.250866	0.251394	0.0959774	0.143744	0.334392	0.493754	0.442802	0.396347	0.428393	0.248979	0.267442	0.105366	0.199173	0.495331	0.664015	0.546615	0.555889	0.559589	0.554573	0.550464	0.784045	0.759747	0.839326
cg24134897	TSPAN4	CCCTGCTCACATGCACCCCAGCTCCCATGCATCCCGGGCTCACACACAACTTGACTCACA[CG]TCTCAGGTTCATGCATCCGTCCCCTGGTGCGTCTCCGGGCCGCCCTCCACCGGGCTGTGC	0.274422	0.350481	0.176229	0.140276	0.18928	0.545922	0.675624	0.466932	0.719185	0.433013	0.276688	0.223611	0.142563	0.203962	0.447064	0.939189	0.912454	0.928958	0.919543	0.945907	0.922893	0.940777	0.902147	0.939789
cg15154229	CPA1	AGGAGACGCCTGGAATGAGGCCCCAGCAGGAGTGGCTGCTTGGAGTCCTGGCTCCTTCTC[CG]CTACCCAGTGGGCAAACAGAACCGCAGCTTTAGGGTGTGGGCAGGCAGAGTCCTGGCTGG	0.464027	0.525571	0.41954	0.452552	0.470708	0.654571	0.726258	0.758104	0.671265	0.700966	0.490209	0.464581	0.48944	0.467875	0.74214	0.787721	0.810258	0.785924	0.793811	0.803783	0.788706	0.799905	0.778961	0.807293
cg00278366	RAD9B	AAAAGCAGACGTTAATAGGTCGTCCCTACCATTGTCTAATTTTTCCTCTTTGCCTTTTTG[CG]CAATGACTGAGGACGCACGCCCTGGCCACAGCCCCACCCACTCAAGTCCCTGTTAACTTC	0.582355	0.564563	0.557794	0.544391	0.535699	0.850975	0.777172	0.845252	0.840446	0.708831	0.563843	0.618326	0.553758	0.499636	0.552113	0.720844	0.687434	0.725365	0.709619	0.751099	0.755014	0.783767	0.739971	0.762835
cg23174919	GLIS1	TTGCCACCTTCACAGCTGGTGAAATTAAACAGAACACAACTCTCTCCACAGCAGACATGA[CG]CCTGAGGCTATGCTGCTCTACCTGAACCCTTTAAAAGGCAAAAAAGATCTTCTGGAGCTC	0.396797	0.496022	0.424449	0.397711	0.401731	0.571632	0.614701	0.681702	0.684611	0.687132	0.525593	0.437738	0.409635	0.508236	0.659395	0.826295	0.816565	0.819659	0.827976	0.808249	0.8129	0.817478	0.772515	0.825031
cg20539816	WSCD1	GAGTTAGAAAAGCTGTTCATTCTGCGTCCAGATAAAAGAGCTCGCCTCCTCTTTTATCCC[CG]TCGCACACTGAGACGGGGCCAGCCAGGCCCGGGCTCGCCCTCCACGCCGGTGAGCTCCAT	0.620901	0.571205	0.642657	0.597477	0.606941	0.832439	0.795101	0.903113	0.902618	0.570441	0.544277	0.632003	0.606067	0.632501	0.790863	0.879577	0.889521	0.910774	0.899887	0.850441	0.843485	0.889246	0.848557	0.897716
cg00510507	ANK3	CCCAAAAAAATCTTTTTAAAAAACCCCACTTAATTGAGGTTAAGATCCTTTTGACCACTT[CG]CAGACATCCTTTTAAAGCTCCTTCTGATTGGATTAAAAACTCCTCTGGCAAGCCTCTAGC	0.578144	0.632961	0.557452	0.702446	0.691388	0.893883	0.87039	0.865252	0.8696	0.773454	0.63149	0.548901	0.720182	0.628403	0.898465	0.0654487	0.0831803	0.0824669	0.0805601	0.089266	0.0922786	0.0839957	0.113552	0.0634758
cg12475142	BAIAP2	CTGGCTGGTCACTCTAGCAGCTGGTGGGGAAGCCAGCCTGGCGGGGCCGCAGCCGTGCTT[CG]AGGAGACGGGTGCCACAGGGTTCCTGGAGCCAGGAGCCAGTTGGGTTTGCCGCCTCTGGT	0.452031	0.476932	0.447624	0.357017	0.5221	0.748725	0.72033	0.894261	0.873699	0.891036	0.484621	0.43712	0.359274	0.444729	0.856642	0.944471	0.950087	0.94092	0.941318	0.951063	0.947968	0.947084	0.939968	0.934936
cg06776201	DPF3	AGTGTAAAGCATGCTAGCCCCGTGCCACTTGGCTGTGCAGAGCGCATCTTCAGAGGACGA[CG]GAGGGAAGGAAAGGGGAGAGGAAAGGAGGGAAAGCAGACAGGCAGCCCAGGCCGGCCAGG	0.31183	0.428984	0.371612	0.376192	0.460542	0.631863	0.754873	0.735153	0.601462	0.407935	0.441517	0.428056	0.417449	0.4232	0.495093	0.871352	0.864476	0.908524	0.88057	0.863237	0.879108	0.875839	0.845342	0.886885
cg05905568		ATGTGCTTATTCAAGAAAATAATTATCTCAATTTTCTTGTACTCTAACCTAAAATGTCTT[CG]CCTTCACGACTTAAAAAAACAAAACAAAAAACCAGAAAAAAAAAAAGAAACGCCAAAGCT	0.314514	0.44124	0.337755	0.27684	0.336548	0.836097	0.653901	0.748401	0.494063	0.335826	0.467766	0.38675	0.294081	0.456649	0.814428	0.871132	0.881943	0.841919	0.847679	0.85742	0.878423	0.883139	0.828233	0.870714
cg13466383	TSTD1	GGCCCCAGGAATCCCCCGCAGGTACCTCCAGCCATGGTGCGCGTAGCAACCGCGAGTCTC[CG]GAGTGCGGCCCTGGCCCGCCCTCTCGGCGCCTGCAACATCTCCCGTTCCCTCCCAGAGCT	0.46913	0.53344	0.550368	0.605026	0.500347	0.757348	0.80259	0.627749	0.797366	0.707699	0.480254	0.591556	0.630707	0.45529	0.775102	0.10792	0.110833	0.281524	0.207224	0.0942962	0.0827826	0.109211	0.115517	0.0831761
cg25631489	PHC3	AATATCTAAAATATACCAAAGCCTATGCAAACTGCAGAGTGGTTTCAAAGAAAATACCCA[CG]AGGATTAGAGGCTGAGGTCTCAGGGAGAAAGGAAATTCAGGGCTGGCTGCAGGGCTTGTT	0.409612	0.462095	0.403355	0.362628	0.362359	0.678027	0.642887	0.549514	0.685004	0.549027	0.452075	0.40586	0.389953	0.408092	0.726703	0.82588	0.807823	0.814645	0.810836	0.794393	0.807663	0.783466	0.743495	0.801804
cg02256049		TACATCCTATTAAAGAGCTACATTAAATGCATGCAAATTGCCGGAGCGACGGCGCTCTCC[CG]ACCAGTGAGGGGGACGGATTGCAGCCGAGGCGGCGATATCGGGGTCAGACTCACCCTGCT	0.687119	0.710994	0.733737	0.571638	0.599679	0.918602	0.949165	0.886718	0.946726	0.804071	0.728603	0.709326	0.586497	0.639641	0.945403	0.10127	0.098521	0.0738567	0.0860667	0.10088	0.0873386	0.0858276	0.0966639	0.0739925
cg08462941	PTPRS	GGTGACCACAGCGGCTGGCCCTGCCCAGAAATGCACATCTGCTTGGCCACACTGAGGGGG[CG]AGGTCAGTCCCAGACCACTTTGAGCAGCTGGGCAGGCCTGCAGAGAGCCTCTGGGGAAAC	0.324617	0.408436	0.304528	0.346851	0.39625	0.475259	0.55853	0.605481	0.655896	0.318658	0.378077	0.354076	0.35043	0.361158	0.655194	0.765401	0.755031	0.746399	0.740576	0.771385	0.744741	0.775919	0.721701	0.756978
cg23893942	CSPG4	TGCGGGTAAGCACCAGCTGGGCGTCAGCAAAGCCCGAGTCAGCATCGCTGAAGGCCACGT[CG]TCTGTAGTCAGCAGCCGCCGCCCACCCCGGGCCACATGGAAGATCCGGCTGATGGTCTGC	0.439779	0.522799	0.458821	0.339272	0.445001	0.79249	0.834632	0.754164	0.850249	0.868219	0.513845	0.41033	0.401389	0.483677	0.60173	0.972988	0.969944	0.978667	0.968572	0.966849	0.962774	0.967421	0.958757	0.978298
cg25006231	C10orf41	TTTGGAGAGAAGAGGGGAGTGAGGCGGTGTGTGCTTGGGGCTGGTGTTTGTCAGTGTGAG[CG]TGTAAGAGCACACCTGCATTCAAGGGGGTTTGTAGTGTCCGTGCGACATCTGAGGGAGGT	0.460903	0.572103	0.51361	0.530689	0.46911	0.791274	0.769337	0.65123	0.750309	0.786936	0.562071	0.531468	0.534299	0.476239	0.764587	0.136145	0.134872	0.132203	0.154474	0.143458	0.149808	0.126455	0.14877	0.134736
cg23084016	ALOX5	CAGGACCTCTTTCTGGGGCACCCTCTGGCACTGGGCCATCTTCAGGCCCTACAGGGCTCT[CG]GGGCCTGCGTAGGCCTCTCATCTCCCAGAAATAAGTTCTTTTCCCCACCCAGACTGACAC	0.422849	0.390226	0.369382	0.302078	0.325287	0.765409	0.558128	0.666854	0.761931	0.77774	0.356787	0.401608	0.290683	0.347925	0.774953	0.793045	0.772597	0.765271	0.753717	0.788711	0.770641	0.788105	0.745639	0.781813
cg11554728	DPCR1	TTGGTGTCTCAGCATTTATTTTCCTGTCTCTTCCACCAAAAGCCAGCTGTAGCTTTATCT[CG]TAAAAGTTACCCATCTTCTCTACTGTCCCCATTCTCTCTCCTCCCACCTTCACCCCAGAT	0.330898	0.448426	0.365223	0.322323	0.37855	0.503081	0.734268	0.904153	0.884039	0.565728	0.425242	0.402102	0.325721	0.39552	0.841889	0.804766	0.804582	0.830054	0.791794	0.796394	0.80636	0.795091	0.758156	0.779116
cg27366766	HSF5	TTGGCCTTGTTGGCGCTGGTGAGGCGCTTGAGGTGCACGAGCAGCTGTGGCTGGTCGCGG[CG]GAAGTGCGGGTTGTGGAAGTGATGGAGCGGCCCATTGCCTGCCGGTTTGCCGCCCCCCGG	0.583182	0.567437	0.685047	0.614566	0.633848	0.936591	0.927195	0.737792	0.849758	0.653275	0.584544	0.684212	0.641342	0.573396	0.550508	0.465317	0.278782	0.522577	0.442845	0.522392	0.391304	0.981767	0.981225	0.980323
cg11196333	CHI3L1	ACCTGTTCTTGAGTGTGTTGAGCATGCCGTAGAGCGTCACATCATTCCACTCCCAGGTGT[CG]ATGTGATCGTTGCTTATATTGGCAAAGCTGTAGATGATGTGGGTACAGAGGAAGCGGTCA	0.550951	0.572816	0.60154	0.518541	0.5524	0.817114	0.820765	0.748089	0.868124	0.828893	0.567395	0.617251	0.539224	0.554411	0.826933	0.832663	0.820828	0.806236	0.823957	0.815047	0.800533	0.809604	0.800651	0.815511
cg16499607		GGGCGGGGCCGCTCCTCTCCCAGCAGGCGGGTGCAGCCCCAGGGGTGCTGCAGGCCACTG[CG]GGACCTTCAGCGTCCGGCTCCCGGCACTGGCCTCTGTGCCCTGGCCGTTCCTGGGGTGGG	0.545965	0.597528	0.558868	0.535224	0.495049	0.819432	0.875365	0.905736	0.864765	0.79296	0.557536	0.581337	0.51959	0.479415	0.902144	0.896282	0.887404	0.91065	0.883906	0.892828	0.883009	0.888865	0.848454	0.904498
cg17070988		AAAGGCCGTCAGAATTCACCCCAGCCGCGGGACAGAAGCGCCTTACGTTTTGGGGGCAGG[CG]CTATTCCCTACTCAAGCCAGTTATTTCCACCCCTACCCAGTGTGCAGCCAGACCCAAGCT	0.422614	0.529868	0.428166	0.428741	0.405618	0.61452	0.878301	0.752687	0.960728	0.576789	0.508665	0.437663	0.428432	0.336078	0.861722	0.0381094	0.0410139	0.0349539	0.030565	0.0469178	0.052843	0.047631	0.0664165	0.048486
cg13755204	VAV2	GAGCCCGGAGCCACGGCCGCCGGCAGGACAGGCAGCCAGGCACTAATCCGGGCCCGGCCC[CG]CCTCCGGCCATGTCCCAGAGCCCCACCACTGACCTCTGGCCCACGAGGACCTCCTGCTGT	0.279851	0.418631	0.258075	0.340636	0.343104	0.540401	0.584757	0.825335	0.684766	0.400579	0.389432	0.294938	0.346905	0.324861	0.613405	0.850264	0.833415	0.880303	0.876576	0.832516	0.835141	0.829775	0.802709	0.841051
cg10635895	CACNA1C	GGGGGCGGGCCTGGCGCGTCTAGCTCGCGGTCAGAGGTCGGGAAGGGCGCCATGGGTGTA[CG]TGGGGACGGCGCCGGGCTGCGGCTGAGCCGCCAGGGCCTGCTGAGGGCAAGCGGGGCCTC	0.589399	0.603554	0.523102	0.534318	0.474834	0.68641	0.956827	0.961644	0.910421	0.932335	0.545898	0.598916	0.550232	0.493153	0.875407	0.9676	0.919368	0.915298	0.968026	0.929606	0.882001	0.956405	0.9463	0.949909
cg21201099	TBX2	GGGTTCCTTCCACTGTAAATCTGGGGTCTTGGATTAGGTGACCTGCAGCTGCCCTTTGCC[CG]ACTCCAGCAGCTCCTCCGACTCGGCCTCCCCGAGAGCAGCCCTTCCCGAGTGTCCCTGAT	0.531075	0.627201	0.523894	0.527329	0.546867	0.826614	0.817677	0.809073	0.832326	0.564349	0.650553	0.533001	0.502651	0.581679	0.730966	0.22932	0.240102	0.236414	0.244012	0.230137	0.233611	0.215151	0.212075	0.211294
cg18100702	IRX1	TGCTTCAATTTAGAAAGCCAGACAAGGCCCTAGGGCTCTCCCAAGAGAGCTTTGCCCTAC[CG]GCGGGCCTGCTACGGGGTGGTGGTGGGGTGAGGGGTGACGTTTTTCGGCGAATCTGCCTG	0.45336	0.413975	0.477275	0.437972	0.449781	0.802192	0.683831	0.701708	0.810379	0.113538	0.402831	0.495207	0.421062	0.373161	0.140523	0.103694	0.107098	0.554986	0.106414	0.114131	0.107892	0.119065	0.192611	0.112504
cg17786902	CAPZB	AGCCTTCTCATCTGTCAAATCACACTCCCTGCAGACATCATGCTGCCCCGATGGGGGTGG[CG]ATGCGGGGGTGACAGGGATAATTTCAAAGCATGGCTACCGCTGAGGCTGGCAGTGTGAAT	0.574212	0.634741	0.562529	0.54861	0.568019	0.700491	0.83102	0.869847	0.902679	0.870348	0.61687	0.56591	0.555516	0.581293	0.906073	0.862213	0.875527	0.868158	0.853114	0.864616	0.851543	0.86478	0.837193	0.871131
cg22472945		ATGGTCGGCTTGTGATTGCTGTGTTCTCCAGTAGAGGTCTTTAGCTGCCAGGAGGCTGAA[CG]CAGAGCAATATTTAATAAGCACTGTCTAATTTCCAGGCAGTCTTGCTTCCTAGCTTTCTT	0.218494	0.344056	0.263759	0.23797	0.282662	0.469515	0.562673	0.825685	0.836897	0.163219	0.284947	0.312687	0.252256	0.313549	0.126009	0.656469	0.684116	0.738353	0.73688	0.693383	0.702552	0.646317	0.709855	0.689235
cg27359566		GAGATGAGCCGGGAAGTACACGGACAGGGAGTGTGGGGCGCGGCCAGGGAGGTTCCGCGA[CG]CCCTCCCCTGACTCTCACTCCAGCTACCAGGGTGAGGGTGAATCACCCCGATTTTAGCTT	0.480072	0.406703	0.494714	0.485476	0.392138	0.598102	0.738686	0.587245	0.775239	0.574859	0.447869	0.552243	0.45656	0.299023	0.533699	0.0639562	0.0807478	0.0934465	0.0754365	0.073842	0.0597434	0.0660603	0.0844576	0.0783983
cg25165932	SELPLG	CCCCTTCAAGCCTCAGTTTTCTCATCTGTAAAAGGGGCACTGTCCACCCTCCAAGGTTCT[CG]GATGATTGATTCCCCAGCTCCTCTGAATGCCCCACTCTGGGCCCAGCCTAGCAACCCAGC	0.453197	0.386907	0.333197	0.307497	0.387457	0.572236	0.555868	0.748119	0.80136	0.859769	0.341516	0.352573	0.315902	0.374194	0.853754	0.816655	0.801739	0.802964	0.808764	0.805195	0.780022	0.815813	0.795603	0.823735
cg05474943		TTGTCTTCAGTGTCGCAGTAGCCACCTCTAAACTCGCCTCCTCCACCCAGGGTGTTTTGT[CG]TAGCCTACCGTGGGCGTGGACTTGACATTTATCTGGGCTCACAAGCCTGCAGGGCTGTCT	0.330637	0.415362	0.354652	0.279469	0.296868	0.593428	0.612503	0.473331	0.465297	0.377216	0.400344	0.381063	0.322471	0.373007	0.489609	0.775143	0.74922	0.738711	0.759837	0.765316	0.750741	0.745907	0.743892	0.777829
cg06423425	LFNG	AGTGCCCACTCCAGCTGCAGTAATGGGAATCAGCTGTGCCACCCTGCGGTATCCCTCCCC[CG]GCCTTGGGAGCCGGCTGTGCTGAGCCCAGCCAACCTTCCCATCACCCTCCTTCCTGCCAC	0.343757	0.330479	0.230482	0.149621	0.327489	0.547393	0.591446	0.570163	0.873444	0.823949	0.345773	0.256795	0.19386	0.280179	0.904022	0.924957	0.898468	0.909358	0.903239	0.926278	0.909351	0.915823	0.923509	0.903265
cg19030737	ITPKB	ACATAATTCTCTAAATCTTAAACTACAGCATTTAGTGAAAGGAGGGAAAACACAGCTGCA[CG]GCTCAGGAGACTGAAACATCCAAAGCCTGAATTGGTCCTTATATCATGATTAGCTGAAAT	0.509441	0.599913	0.529961	0.498677	0.516739	0.882803	0.781459	0.784452	0.769915	0.779143	0.595284	0.53383	0.500068	0.561853	0.686848	0.876821	0.834508	0.816461	0.855918	0.85592	0.848196	0.867051	0.839399	0.845246
cg20491328		GCTCTCAGGGCAGGACTGGGTGGGCAAGCGTGGACTGCATCTGTCCTGCATGGGGTCCTG[CG]TCTGGCTCGCCCGGTGCCGTGCTGTGGGGCCCACGCCAACGGCTGACCTCATGGTCCTCC	0.643671	0.675968	0.625716	0.600524	0.612028	0.850455	0.735424	0.863946	0.876515	0.903879	0.640498	0.642102	0.604214	0.650622	0.8987	0.882603	0.897906	0.891521	0.875337	0.872266	0.867359	0.896965	0.865878	0.875352
cg25076459		CCCAGCAGCATTCTCCTTCTCCCACTGGCCCGAGTCACGAGCTTTGGGCCTGGGCTGCCG[CG]GGCTTCTCTGAGATAGACTTCGGGGTAAACAGAGCTGCAGCTGCCAGCCAGCCCTGACTT	0.558266	0.579556	0.574277	0.494703	0.450651	0.763408	0.823132	0.726579	0.864973	0.85097	0.542624	0.558026	0.485709	0.506869	0.846575	0.0951845	0.100789	0.0904616	0.102855	0.101772	0.100051	0.102157	0.1048	0.0964792
cg08863830	SKI	AAACGGGCAGTGTGCAGTGTTGAGGGGGCGCTGGGGAAACAAGCTGCCGGCTGAGGAGGC[CG]CACTCCCCGTGCCTCCCGGGCAGACACCTCACGGCCTTTCTCTGGGTGTCTGAACCCAAG	0.333648	0.331693	0.222422	0.359305	0.313103	0.442871	0.562221	0.588256	0.635602	0.371953	0.316668	0.279701	0.37011	0.317819	0.490694	0.90228	0.903049	0.868853	0.86921	0.893017	0.865739	0.893202	0.772036	0.883488
cg23143210		GAATGTGGACTTTAGTTACTGAACGCGTGTGATGGCCCGCCTGTGGTAAGAGGTGCGCCT[CG]CCAGCATAACGTGTTAATTACAGGGGACGCTGGCGGTGGGGGAGGGGCTCTGCACTTTCT	0.572123	0.546188	0.587879	0.489798	0.462269	0.886331	0.874942	0.924423	0.926851	0.6888	0.558911	0.540324	0.465983	0.49032	0.439874	0.957701	0.955973	0.968295	0.954955	0.959537	0.954318	0.950471	0.932745	0.950212
cg22331740	CYTH2	CGTGGATCCCGAGCAGGGTGCGATGGCGGATTGGGAGGTCCCATGTCACTCTCCCATGCC[CG]CCTTTGAAGCTGAGGCGCTCTTTAGTTAACAAACTACAAGTCCCAGCAGGGACCGGGACG	0.550042	0.536979	0.506466	0.471886	0.449198	0.8072	0.803211	0.762294	0.803579	0.78147	0.500387	0.532925	0.491314	0.435402	0.640903	0.514338	0.473682	0.445846	0.422791	0.490419	0.452622	0.850133	0.821872	0.844242
cg06868955	ATP5G2	AAACCCTCATCTCTAGCCCACCATTTGTGACTTTTACAACTTCACCAGCGTGCCGGGATG[CG]AGAAAGGTACTGGTAAATAACTAGTGATTCCAAAGCAACCAGCCTCTCTCTTCTGCCTTA	0.347674	0.326389	0.265096	0.295651	0.221938	0.436358	0.566659	0.518165	0.481553	0.346032	0.326834	0.294612	0.289972	0.221745	0.494374	0.711332	0.713549	0.68705	0.664093	0.699013	0.642849	0.665323	0.714292	0.711311
cg24295890	PTPRG	ACCTCAGGTGATCCACCCACTTTGGCCTCCCAAAGTGCTGGGGTTAATTGCGTGAGCCAC[CG]TGCCCGGGCCTGGCTGTTATTGGCTTCTTAAGGAAGCCCACTTAACAGTAATTACTGGCC	0.301647	0.391406	0.319299	0.268002	0.362921	0.550413	0.525661	0.497039	0.623143	0.582049	0.359126	0.349098	0.284232	0.330322	0.474528	0.786962	0.77222	0.788239	0.771743	0.788045	0.752531	0.782622	0.70918	0.760035
cg02667577	WIPI2	GAGGACGAGGCCAGCGCCCTGCGCCTGGATGAGGACAGCGAGCACCCGCCCATGATTCTT[CG]GACTGACTGAACTTGACCTGTGACCTCTGACCCGGGGAGCAGAGAACACTGGCTTCACAG	0.412895	0.5211	0.42816	0.398123	0.453418	0.615185	0.760684	0.669958	0.83427	0.83559	0.473158	0.447846	0.401823	0.479017	0.825973	0.833849	0.816078	0.809695	0.837386	0.822489	0.820349	0.835711	0.801807	0.828206
cg19030814	SIPA1L2	GCACATTAAACAAAAATAGCTGCTGTATAAACATGCAGGGGTGAAACTGCAGATAGGACT[CG]TCATTCATACAGTCAACAGCAATTCTGTTGTTAATTACCCACTGGGAAGGTATGTTATGT	0.350054	0.451443	0.462666	0.452526	0.378433	0.716297	0.59723	0.75498	0.680481	0.765566	0.522905	0.483486	0.523315	0.48205	0.762466	0.814046	0.768954	0.758067	0.759856	0.815415	0.805007	0.816155	0.816738	0.79902
cg20994660	TBR1	CTCAGGTGTTGTGTGCTTTTGTATTAGCTGGAAAAGACAGACTCTGGAACTTTTACAGGG[CG]AGAAGAGGCCACCGGCTCGCGCTTTGTATACTTTGCACTTGAAATCGTTACATTCAACTG	0.468463	0.522664	0.494575	0.464464	0.397191	0.715492	0.764826	0.816526	0.872792	0.7878	0.546273	0.49505	0.491629	0.443868	0.51864	0.0643943	0.0595387	0.0578663	0.0756251	0.0637367	0.0592296	0.0722559	0.116853	0.0615343
cg21229570		CCTCTCCCACACCAACCTCCAGCGCGCGAAGCAGAGAACGAGAGGAAAGTTTGCGGGGTT[CG]AATCGAAAATGTCGACATCTTGCTAATGGTCTGCAAACTTCCGCCAATTATGACTGACCT	0.442041	0.603417	0.494239	0.494113	0.539971	0.945727	0.954708	0.788966	0.871932	0.610131	0.637194	0.518345	0.50121	0.455954	0.770201	0.0491949	0.0477506	0.0469402	0.0376924	0.0421913	0.0403083	0.0698572	0.0337587	0.0469148
cg04245402	C19orf21	GGGGCGCCCCGGGCCGGGCCGGGCGGGGATCCTGTGTGGGGCGGTTGGATCCACATTTGG[CG]TGGGAGCGTCATGTGTCTGTGGGCGGGGTCTGCTTGCCTGGCGGCACTTGGGATCCAGGG	0.431212	0.547088	0.419538	0.473957	0.531963	0.674476	0.680785	0.850037	0.868129	0.897507	0.516633	0.494906	0.513746	0.515132	0.929457	0.908745	0.890871	0.944028	0.929557	0.931101	0.905677	0.916734	0.907052	0.929041
cg05341232	PDE4C	CGAGGCAGTCAGGGGCCTGCCCAACCCCCCCGCTCAGGGACCCCACGCCTCTCGCGACTT[CG]TCTCTTCATCTGGACCCTGAAACTGTTCCCACGGGGGCCACCCAGGACTCCTGGACCCAA	0.466516	0.51591	0.546851	0.516532	0.476988	0.864295	0.768244	0.816337	0.700032	0.589622	0.539552	0.577172	0.543863	0.492725	0.561874	0.734814	0.714059	0.738702	0.751648	0.767853	0.735844	0.763285	0.755498	0.782739
cg08982878	WDR90	GGGGGCTGTGTCGGAGCTGAGGTGCAAGGGCTCAGGCGCCAGGTGAGCTGTTCACCCCTA[CG]TGTTTTGGCTGCACGTGGGTGTTGGTGTCCCTGACTGGGGCTTGCAGCCAGTGCCCCGCC	0.566664	0.574098	0.61869	0.601675	0.559192	0.822074	0.773507	0.822226	0.864455	0.883178	0.602708	0.63609	0.602157	0.568969	0.865096	0.819143	0.773704	0.819693	0.775226	0.830574	0.809356	0.806934	0.788856	0.783033
cg09833158		CCATTGTCCTGGAGCCAGCATGGGGGGCTCTTCATATCATAAGTGATAGTGCTGACAGCA[CG]TTTATATTATTTTCTTTAGCAGGAGTTTAGGTGTTCCCAGAACACTGAATTGAACTAAGA	0.378393	0.469468	0.440686	0.387503	0.361245	0.76451	0.587819	0.819796	0.576921	0.491796	0.558482	0.441058	0.471399	0.433614	0.378072	0.793508	0.789566	0.74702	0.765259	0.78553	0.803416	0.835698	0.763442	0.826382
cg20722210		ATAGCATGCTACTGTGGTTATCCCCATCTTTCGGATGAGCACATCCAGGTTTAAAGTTGC[CG]TCGCCTGCCAAACAGTGGCAGAGCCAGGATTCGAGCCTTGGCAGTTGATTCCTAGGGTCT	0.652279	0.728216	0.603365	0.593882	0.631455	0.890373	0.862126	0.852778	0.868756	0.888077	0.709646	0.668739	0.608092	0.692832	0.877317	0.21031	0.209799	0.257753	0.229196	0.235257	0.223119	0.245697	0.238587	0.229363
cg00650809	ANO8	CTTCCTCCAGGAGGGCCTCCGGGCTTGGGCCGGGCCGACGCCGCCCCGCGCCGCGCTCAG[CG]AAGCTGACCTTCTTCAGCCGGAGCCCGCAGTCCAGGAGGCCCCCTTCCTCGCCCTCCTCC	0.563078	0.665095	0.645077	0.589776	0.508202	0.914283	0.847367	0.862707	0.721816	0.865409	0.66319	0.676921	0.598487	0.509071	0.720656	0.124872	0.108188	0.1166	0.0943477	0.120893	0.1258	0.114813	0.133093	0.103456
cg00094585		CGTTCGTAGTTTACCCCCTTGGTTTATTAAGTAATAGTTGTAAAAGTTTATAACAGGTCA[CG]AATTGGCGGCACCTTTGTATTGATTGGCACTCAAAGTGACTTACAAAAACTTGGCTTAAT	0.262087	0.393842	0.373843	0.390283	0.293106	0.789016	0.639442	0.704268	0.547096	0.513061	0.405724	0.381976	0.330755	0.344719	0.62486	0.833021	0.818596	0.830015	0.825279	0.799055	0.786872	0.786406	0.803043	0.815402
cg17016369		TGAAAACTCTACCTCCAGGAAACACCTAAATTGATTGCTCATAAAACTATTTCCTCTGCC[CG]GCTGCCCACCATCTGGGAAGTGAGAAGCACCTCTGCCCGGCCGCTGTGCAACCCTCCAAG	0.44232	0.498537	0.489842	0.535474	0.522933	0.605787	0.773538	0.677566	0.745468	0.538649	0.519424	0.516778	0.559617	0.463487	0.542362	0.826817	0.810987	0.813276	0.810361	0.804909	0.803069	0.817865	0.772051	0.812329
cg15964132	OSBPL5	CCGCCCACTTTGCCGGTGGGACAGAGTGGCTGACGGCGTGTGGCACAGGCGGGGTGAGCC[CG]GAAGGGTGAGCATGCGCCTGCTGACGCTTCGTTCACCAAGCGGGGGGCCTCTACAGCTCG	0.50485	0.485837	0.462506	0.387498	0.368081	0.606773	0.88123	0.762654	0.971981	0.777033	0.461325	0.470243	0.404944	0.371875	0.936647	0.953409	0.952822	0.953074	0.94909	0.936985	0.943385	0.944207	0.885818	0.920988
cg05370101		CAAACCATCTGCACCCTCTTCTTCCGCCCCAGACGTTATTTATGTGTGTGGCTTTGTGTT[CG]TTGCTAAATGCGGCCTGTGTGAAGGCTGTTAATTAACCCTTTGAGAAATGCGCTTCCCAT	0.269564	0.22165	0.234873	0.223335	0.192306	0.34761	0.443032	0.566212	0.445464	0.353547	0.205772	0.262273	0.224873	0.161351	0.41119	0.412217	0.433741	0.447252	0.454048	0.429942	0.428847	0.450306	0.461944	0.440107
cg07067744	BRSK2	TCGCTCCGGGTCCTGGTGTTTTCACATAGCAGAGGAGAGTGCCCCAAGCCTGGCGAGCAC[CG]CCTGTAGCCGCCAGCAACACCCCCCACCTCCGTTACGCAGGAATAGTCCCAGCCACCATT	0.466641	0.505439	0.588255	0.5037	0.535032	0.620831	0.799803	0.806664	0.781226	0.429688	0.47607	0.585817	0.474011	0.421492	0.531685	0.878769	0.873739	0.896876	0.872729	0.868129	0.866634	0.887762	0.850169	0.886254
cg13916459	ALX1	TTGGTTGGCATTAGTATAATGGCTTCATTGCCTCTTGCTCGGCTTCTCTCTCCCACCCAT[CG]CCACCGCGTCCACACTCCGCCGCATTCCAGAGAAAAAGAAAAGGCCACGGCCTCGTAAAG	0.441203	0.544681	0.563895	0.554031	0.539729	0.75101	0.847389	0.72481	0.925737	0.671053	0.566949	0.53421	0.561298	0.535796	0.250902	0.144146	0.1438	0.153466	0.155664	0.159701	0.14368	0.14987	0.167993	0.146318
cg02418439		GGGAGCAGCCCCGGGCCCGGGTGGAGGGCCGTACTGTCTTGGCATTCTTTCCTCGGCAAG[CG]AGTGAGTTCAGTCGGCTTTTTAATCAGCAAGACCTTTGATCCAGCAGGAATGAGTAATTA	0.445878	0.524443	0.432049	0.427777	0.422121	0.663168	0.670265	0.632577	0.679922	0.60531	0.505327	0.440946	0.423251	0.465676	0.613355	0.123009	0.126047	0.139533	0.132793	0.130041	0.133377	0.126553	0.138603	0.135474
cg20608783	BAI2	CTAAATCCCAGGCCAGCCTCCAGGGCCTGTAACCTACCCGCGGCCCGGCTGTCACTCGGA[CG]GCTTCATTGACCGCCGTTAGAGGCCAAGCTAGCCTGGGAGAGAGGCCACAGCAAAGCCAC	0.424705	0.413015	0.324207	0.297907	0.330956	0.636005	0.841658	0.852085	0.802293	0.896547	0.380673	0.395169	0.282605	0.322041	0.854205	0.833601	0.846691	0.874839	0.856308	0.878354	0.835085	0.870955	0.786581	0.859635
cg24401641	SNED1	CCATGAATCGTCTCATAGCGGTGGTGTTGGTGCCTGTGCTGGCCGAGGCCTCCAATGAAT[CG]TCTCATAGCGGTGGTGTTGGTGCCTGTGCTGGCCAAGGCCTCCCGTGAATCGTCTCATAG	0.437673	0.483604	0.474923	0.511459	0.48293	0.802907	0.576054	0.676033	0.809193	0.806395	0.451281	0.512362	0.5135	0.519424	0.819565	0.775289	0.787098	0.774129	0.789764	0.786335	0.761199	0.790165	0.719144	0.783559
cg09012091	GPLD1	AATAAAATTTTAGATATAAGCCAAGCTTGTCATATAAAGGATCCCTGTGATCAGACCTTC[CG]AGAATCTTCCCATAAAGTTAATAACCATATTTTTGTTATGTGGTTAATCCTACATTTTTA	0.251382	0.317173	0.193222	0.195715	0.322943	0.476228	0.640759	0.590008	0.663719	0.61156	0.214732	0.18188	0.220575	0.288533	0.816351	0.705273	0.697851	0.762967	0.759713	0.776142	0.778338	0.734927	0.705075	0.732329
cg05807291	DCT	CCTTAGAAGCGCCTCTAACAACCAAATTTAATGAGGGTAGCGCTTCTCACCATCTTCCCC[CG]TTAAGTCAGGCTTTGTCTAATTGAGTTAATTTACAGAGCACCCAGTCATACTACTTATTA	0.223663	0.356363	0.337157	0.336965	0.374174	0.544642	0.458827	0.578768	0.606024	0.697118	0.352642	0.35782	0.310592	0.334195	0.750073	0.864008	0.81766	0.830291	0.839369	0.820353	0.829397	0.824455	0.778965	0.877593
cg25138553	HSPG2	AATGGCCTGGCATGAGGGCCTCAGGCCCTGCCCTGGCCTTAAGCCAGAAGGAAATGGTCT[CG]CTTTTGAAAACCAAACCCACAAGGGCTAGACAAGGTAGTGAGGTCCAAGCCAGAGCAAAG	0.377329	0.447611	0.367888	0.371215	0.495007	0.54856	0.684745	0.631827	0.725433	0.736699	0.421807	0.413331	0.442518	0.460193	0.534013	0.861353	0.847725	0.852768	0.838042	0.881136	0.859296	0.83757	0.823605	0.86159
cg09420993	TSC2	TCGGCTGTGACAGTGAAGGGCAGGGCCTCACCTCGGCTGCTCCTTGTGAGTTGTGGGCCC[CG]TGTCTGTGCCCGGCCGCCCTGCGGTGCTCACCAGCCTTCTGAACGAGGAGCTGGACAGGA	0.644206	0.643572	0.669878	0.646943	0.677607	0.845941	0.860333	0.892833	0.851331	0.677371	0.670511	0.693985	0.632254	0.683158	0.468976	0.823158	0.825237	0.816894	0.815804	0.830184	0.832546	0.823758	0.796807	0.804827
cg24201033	CPT1C	TGCCCTCTGTGCAGGACACCGTGCGCAAGGTGGGCCTGGGAGCGCGCAGACGGGCTGGGG[CG]GCCGGGGCGGGCCGGGGGCGTGACCTGCCCTCTTCTCCCCTTTAGTACCTGGAGTCGGTC	0.706931	0.736152	0.766009	0.727626	0.743713	0.958038	0.919188	0.94168	0.972637	0.927022	0.727453	0.804554	0.744837	0.658564	0.872351	0.635569	0.640114	0.805856	0.87779	0.89074	0.78982	0.964448	0.927204	0.926712
cg14144305	ALX4	AGGGGTTTGGGGGGCTAAGGACGCTGAGGCTCCGGGGGCAGGAAGTTCTCTCTGGTTAAG[CG]TTCTCTCTTCTCTCCGGCATACACTCCCCTACCCACCCACCTCGCCTACCCTCGGGGCGA	0.497499	0.631574	0.567132	0.494571	0.577674	0.868787	0.843645	0.8078	0.902028	0.604353	0.649311	0.579455	0.509497	0.596496	0.853896	0.113826	0.132861	0.111186	0.135226	0.128917	0.118787	0.123739	0.136729	0.116119
cg20671274	GLI3	CTTCCTGCACACGTGTGTAGACACACACAAGAGAAAAGAGGCAGAGTATATTTCTAGCAT[CG]CACTTGATGTTTTTCAACACAGAGTTATAAAAATTGAGGCAATGTCACCAAATTAGCTAA	0.433461	0.535331	0.429593	0.405077	0.466589	0.682032	0.78763	0.816526	0.817748	0.611197	0.547034	0.468434	0.454786	0.505691	0.657261	0.841524	0.82165	0.814192	0.764279	0.841102	0.841906	0.835186	0.819381	0.85787
cg26597485	LDLRAD3	GCAGGCACCACTGAGTTATGCAACATCATAATTTCTCAGGCAAATGTGATCGCTGCGTCT[CG]CCTGCCAAAGTGAAGAGAGGTCTGAAGAGAGCCTGCTTTCGGAGACATAAGTGAGCCCAT	0.321895	0.485095	0.388207	0.333599	0.398341	0.62469	0.655014	0.63964	0.624291	0.516852	0.470282	0.408095	0.359183	0.436181	0.543836	0.87524	0.856296	0.871601	0.854944	0.851959	0.867092	0.88182	0.846321	0.877424
cg01909856	NOTCH1	GGAGCCTGAGGTGGCCCACGGAGGAGTGCCCAAGCCCTCAGCAGCCAGACCAGCTCCACA[CG]CAGCATAATTGCTGGTGATTAAGTAATTGCCAGACTTTGTCCAATAAAAGTCAGCACGTG	0.484998	0.541749	0.472465	0.400991	0.486402	0.64001	0.71619	0.817055	0.648853	0.632197	0.509475	0.497571	0.426749	0.517914	0.668348	0.861379	0.877952	0.880186	0.880233	0.873499	0.882373	0.88441	0.838976	0.888174
cg07739826	OSBP	TGCAACAATCTCATTTCCTAAGAATAGCTCTATTTTATATATACCAAACCATCTCGCTCC[CG]ACTGTAACTCAGCCCAAATGAGAACTCAGCCCAATGTTACATCATGCTTAGAGTTATATC	0.526184	0.539322	0.435424	0.430847	0.495961	0.692361	0.85367	0.605595	0.738763	0.879144	0.477215	0.466183	0.42	0.493644	0.881625	0.865618	0.86702	0.897844	0.857948	0.871777	0.869946	0.84695	0.855974	0.862355
cg01978236	NOTCH4	CCCATCCCCCAGCAGTCACCACCCCTGGCACCAGGCCCGAAGCAGCTCCATGGGCAGAGC[CG]TCTTTCCCTGGAGGCCGTCTCTATTTGGGCAGTGAGAATCTCCTCCATCCAGCATCCCTC	0.343823	0.344581	0.256282	0.245004	0.332776	0.471662	0.649832	0.712756	0.745387	0.547253	0.356316	0.282094	0.285232	0.320577	0.695072	0.737058	0.725143	0.704202	0.703192	0.710022	0.719076	0.752413	0.679083	0.758915
cg18077580		CTCCCTGCCTTTGCGGTCTGGACTGCACCAGAAAAACACAGCTATTGTCGCACTTCCTTT[CG]GGGGAAACTTCAGCACCGGGAGACTGGCGCCCAGCAGCATTCTCCTTCTCCCACTGGCCC	0.800458	0.659328	0.776495	0.660161	0.665654	0.92904	0.919204	0.921041	0.927898	0.919086	0.638035	0.773533	0.681577	0.684515	0.928374	0.194889	0.203192	0.156195	0.226723	0.203014	0.220198	0.191586	0.209254	0.149683
cg06412777		GGCACCTGCCGGTCTTTCCACCTCTGCATGCATTTCACACTTTCTATCCTGTTAGGCGTC[CG]CACTTCTATGCCAATGAGGACTCCCCTTCCCACCCCTGTTTTTTTATGTCATGTGGATTT	0.269236	0.338404	0.298689	0.303356	0.313758	0.524428	0.542482	0.586993	0.515287	0.327756	0.323014	0.334731	0.325356	0.290572	0.508302	0.105593	0.10317	0.10028	0.126448	0.107948	0.110681	0.106357	0.091353	0.115176
cg06219337	YWHAE	AACTTCTCAATCTCTCCAAACATTCTACGACCAGTGCTTTGTACCAGTTTGTACAAATAA[CG]ACTACAATGACACTCTCTTCCAATATCACTGTCATCTTTATCCTTTTAACACCAGCAACA	0.619395	0.593842	0.640559	0.65396	0.638914	0.848321	0.86194	0.865505	0.864148	0.855986	0.62407	0.649632	0.651838	0.619298	0.874345	0.841562	0.846637	0.810842	0.8224	0.822232	0.794528	0.822513	0.80898	0.839126
cg05191175		GAGCCAGGATTCGAGCCTTGGCAGTTGATTCCTAGGGTCTATTATGAGTTTGTTACAAAC[CG]AGCTTCTTTCTTCTCCAACCCCACCCCCACCCGCAGCTCTGGAGACCATTTCTCCAGGCT	0.550664	0.583948	0.454769	0.450209	0.50598	0.868721	0.885517	0.839068	0.882333	0.634197	0.566108	0.474986	0.463985	0.562691	0.846725	0.0783375	0.0673385	0.0763619	0.071873	0.0897988	0.0723014	0.0838584	0.0922189	0.0849527
cg22851864	ASB13	GGAAACGTCTGGCGTGTAGGCCTGAAGCCACTGCAGCCCCGTGACCTTGCTCAGGGAGGC[CG]GAGGCTTAGGATGAAGCCAATACTGAGGAAAGCAGAATCGCAACGTTCAAAGAAACTGAG	0.35521	0.469209	0.356098	0.433498	0.440836	0.647991	0.605863	0.689974	0.608871	0.627212	0.45302	0.3747	0.478123	0.451458	0.766254	0.843796	0.815219	0.859473	0.828205	0.836487	0.83881	0.839684	0.782121	0.83342
cg16460816	IFT140	TTGCCCTGTGTTGCCTTAGAGTTTTCTTCCCGAGGTTTTCCTAGAAAGCCACTGTAAATC[CG]AGCTGTGCACTCAGAAGCCTCCCGGGTGTGTCCCTGGTGATGTCCCCGGGGCCTCTCCCT	0.628775	0.621077	0.598231	0.597465	0.568342	0.829548	0.753428	0.874304	0.848852	0.869327	0.61869	0.629943	0.635571	0.579985	0.843216	0.787081	0.811224	0.829997	0.818794	0.824651	0.827029	0.831181	0.79004	0.809677
cg16308790	NFATC1	CCTCCGGCGGCAGCTTCAGCTCCCCTGGGGCAGCTCTGATGCGGGGCAAAGGCAGGAAGA[CG]CCCATGTGCCATGGCTTCTGCTTCTTCCCAATGAACTGCAGTTAATTAAACAACACAGAC	0.272773	0.226928	0.249494	0.120675	0.263276	0.43687	0.451281	0.453922	0.625739	0.810072	0.179561	0.330105	0.153517	0.260867	0.822921	0.6476	0.653507	0.699418	0.708588	0.678714	0.67753	0.670164	0.666013	0.705894
cg02933228	CDC42BPG	CTGGGCAAACACCTGCCTCACCCCGCCCTGGCCAGGCCCCCGTGCCTTTTCCCCATGGCC[CG]GCAGGGTGTGACCAGGGAACCCTCCAGCTGGCGCCAGTGCCCACAGTGGGTTCAGGGTCA	0.609145	0.638588	0.654267	0.620428	0.63983	0.826853	0.796195	0.838613	0.879832	0.884999	0.615298	0.665912	0.632335	0.594005	0.871248	0.831159	0.823016	0.854852	0.821127	0.815638	0.818135	0.806812	0.784644	0.824344
cg14339991	ATG7	TTCCTCATCCATACAGTGGGGAAAATATTTTCTGTTTCCCAGGGAAATTGCAATGGCTGA[CG]TGTATCCAGTTCCCTGTGGCCAAGTACCAAGGCCTTTGCCCACTCCTGGGACTGGTGTTG	0.378501	0.477419	0.3425	0.389355	0.442365	0.592105	0.670767	0.648984	0.649949	0.651815	0.442333	0.364252	0.402409	0.448539	0.536444	0.80483	0.82616	0.844996	0.844391	0.84365	0.784162	0.809404	0.781972	0.826625
cg05487507	LOC404266	CATCCTGGTGGAACTGCTGTTACCGGTCCACAGCGCCCAGGCCGAGCCGGCAGGGCTGGG[CG]GGAGGCTTGAAAAAGAAGGAGAAGCGTTCACTTCTCCTGGGCCACTTGGAAGTTCGAAAT	0.489957	0.604794	0.50517	0.551246	0.553325	0.77481	0.780898	0.756874	0.714145	0.514949	0.600044	0.540304	0.548855	0.550647	0.707076	0.156459	0.15986	0.150052	0.159543	0.169889	0.164933	0.194564	0.22209	0.205171
cg03894572		CCTTTTCCAGGATGTGGGAAAGGATTTGCTTGCAGCAGCTAAGTAACATGACATACTGTA[CG]TAGTTGTTGGCCAGGATAATTACACAGCAAATCACTTATGTGGAAAAATACTCAGTAGAC	0.353003	0.482014	0.397809	0.430593	0.440296	0.766738	0.647315	0.651396	0.818964	0.838781	0.5283	0.390527	0.517496	0.412236	0.826486	0.854449	0.833542	0.78484	0.843984	0.866178	0.84673	0.85563	0.788083	0.88039
cg19474571	CLIC1	ACACATGTGTACACCAGGGGTGTTTCAAGGAACATAAGCAGGCCTACCTTTTGGTGTCAA[CG]GTGGTAACATTGAAGGTGACTCCCTTGAGCCACAGTACCATGAACAGTCTCTGGGAGAAT	0.518569	0.489734	0.506536	0.459469	0.448905	0.743235	0.676971	0.706307	0.690673	0.491257	0.482986	0.507371	0.457492	0.491512	0.66657	0.735755	0.767719	0.74529	0.752142	0.774087	0.757182	0.762323	0.71327	0.761528
cg22707705	CYP27A1	GCTGGGTCCTTCATTCCTGGCTTGAATGTGATCTTTGACCCTGTATTTATTTTATACTTG[CG]TGAGTTATGTTTTTAAACTTTTTGACAACTATACTTTGAATATACATGAAACATAGGATT	0.368022	0.455856	0.423783	0.389597	0.379021	0.63342	0.710504	0.765971	0.656604	0.622421	0.455257	0.446597	0.403907	0.3884	0.6061	0.678549	0.660829	0.683664	0.684858	0.71798	0.675072	0.694728	0.665503	0.715071
cg11260848	ALX4	CAGCAGCAAAGGCCAATATATTTCCATTTCTTATTTCAGTTTGCCACCAAAACAAAGCTG[CG]CGCGGCTGAGGGCAGGAAGGCGCTGAGACCGAGAAGAAGGGACGTCCCGGAGAAAGTGCG	0.363807	0.489886	0.442662	0.423696	0.454915	0.81935	0.770623	0.631261	0.812048	0.447359	0.480147	0.446491	0.413635	0.428989	0.473203	0.100684	0.109299	0.105671	0.112238	0.10865	0.104204	0.097782	0.109194	0.0958961
cg14244013		AGGCGGCACAGCTGGAGCCCGGATTGTGGCACGCCGTCACCGTGCTGCTCCGGGGAATCC[CG]ACCCGCTCCCTGCGAAAGCGTTTCCGAACGCGAACCCAGAGCCTGTGAACGCGCCGGCAA	0.603473	0.829606	0.736027	0.681944	0.792389	0.967785	0.966345	0.973144	0.976303	0.967559	0.850502	0.684032	0.747525	0.754284	0.973135	0.0315373	0.0297388	0.0303312	0.027072	0.0413171	0.0346463	0.0404606	0.11395	0.0434819
cg06259934	ZMIZ1	AACAACTTGTGTTGGTTTGCACCATAAGGAGAACACGCACAACATCCACTGCCCCGCATG[CG]GCTGCCAGCGTGGCCTCTGTGCTCACCGGCCTCGGGGGTGAGGGGTGGTGACTCCCCATC	0.207019	0.398777	0.208905	0.207054	0.315887	0.55277	0.612933	0.664635	0.6475	0.422567	0.34584	0.253111	0.214833	0.360491	0.611938	0.903473	0.895862	0.919118	0.902612	0.899419	0.900686	0.906089	0.862412	0.918227
cg10191399	CMIP	CTCAGTTCCAGACCCCGGCAGTAACTCCGGCCGCCTCGTCTCTTCCAGGGAACTGAAGTA[CG]TGATTCAGAGGTTCGCCGAAGACCCCAGGCAAGAGGTGAGGCCTTTGTTTCTGCATCTCA	0.360097	0.473829	0.408966	0.514872	0.3948	0.57869	0.840309	0.806987	0.914653	0.435459	0.477222	0.424187	0.535501	0.393937	0.61846	0.905396	0.910023	0.928378	0.887046	0.887256	0.897267	0.887199	0.860696	0.883042
cg22525294	TSKS	CACTCCAGCCTGGGCGACAAGCGAGACTCCGCCTCAAAAAAAACAAAACAAAACAAAAAA[CG]ATCTTTGAGGAACCTCCCCTGTGTCCCCGCCCACCGCAGCTCCTGGAGACTCCTCCCGTG	0.193229	0.199094	0.27086	0.143414	0.19705	0.434581	0.421309	0.604968	0.491282	0.110114	0.217601	0.261671	0.157916	0.23438	0.102124	0.444371	0.438814	0.503548	0.533819	0.491615	0.439451	0.539777	0.622831	0.58822
cg03983270	CMIP	GAGCCTCGCATTGGCCTCTCGAGGTTACCGCAGCGATCGCATGCAACAGTAGATGCACGG[CG]CCCGGCGGGCCGGCACAGTCGCTGCTCGGAAATGACGCCGGTGGTGATTCTCCTCTCTGC	0.510591	0.628147	0.542771	0.508137	0.568123	0.88958	0.930524	0.691681	0.909985	0.96612	0.592256	0.558571	0.53679	0.587074	0.971345	0.937777	0.948876	0.939496	0.94553	0.946344	0.93166	0.950801	0.896388	0.941218
cg22863744	NCOR2	TAGTGCAGCCAGCGAGGGAAGGAGGAGGAGGAGGAGGAGGGAGGGTGAGATAGAGGCGCT[CG]GAGATACCCTTTCTAGGATTCTTGTGTTTCACAATCATGTGATTATTTCTGGGCTGCCCC	0.320509	0.452157	0.355283	0.367113	0.410581	0.683767	0.66584	0.521977	0.693736	0.569721	0.379015	0.273581	0.213156	0.36663	0.630299	0.774544	0.782716	0.778262	0.784822	0.780544	0.78127	0.764706	0.732111	0.753677
cg03994651	LMTK3	GCGCAGTGGGATCCACAGGCGCTCTGGGGTCAGGTAGTAGTCCTCCTGAGGGAACCAGGG[CG]GTGTCAGGCGGGTCAGGGCACCCCACAGCCCCCATCCCGACGGAAGGAAGCCCTACCTTG	0.583808	0.585351	0.563235	0.493845	0.565681	0.834289	0.728433	0.798303	0.819297	0.560057	0.560265	0.578921	0.531574	0.524231	0.797509	0.330076	0.334533	0.253206	0.313073	0.286828	0.2896	0.250703	0.284477	0.224126
cg24877677		GCCCACGGCCTCCGGAAAGCATAAATGTCCAGGCTAATGGGAGTGCTGAAGGCTCTGCCT[CG]TTGATCAGCACAAACGCTTGTGTCCTGCTCTAAGGCTTAAGCGATGGAGCAACGTTTTCT	0.561422	0.460325	0.454432	0.465844	0.507685	0.827255	0.598951	0.810261	0.81358	0.469176	0.445016	0.475784	0.472704	0.459032	0.451083	0.169103	0.167698	0.182691	0.160209	0.166695	0.173486	0.177602	0.145843	0.162909
cg02931762		CTCTCCTATTTCCTCCTTGGATTTCTGTCTCTCAGGTTCTGTCTCTCAGGTTCTCCTCTC[CG]TAAATATTCTCTCCTCTCCCTCTCCGGGATCCGTCCCCTCCCCCACGTGGATCTGCCTCC	0.463181	0.602011	0.626252	0.610702	0.595667	0.787967	0.834898	0.748154	0.840125	0.843719	0.643728	0.634388	0.62063	0.613449	0.834051	0.11097	0.118492	0.113574	0.132132	0.128518	0.119014	0.120778	0.118799	0.116906
cg14374337		CTCTGCCCCTGCCTACTGAGGCTGACAGCTGGGCCTGTGTGCTCCCTCCACGGCTGCTGC[CG]TCTCTAGCGCCCTGGCCTCCAGCACATCCAGCAGTGGAGGGGATGCCCCTTATTCCAGCC	0.262305	0.362923	0.247358	0.201194	0.248857	0.573127	0.391082	0.535812	0.441524	0.31399	0.338694	0.252462	0.207434	0.337877	0.371887	0.73601	0.683662	0.744952	0.729344	0.780677	0.72497	0.747093	0.69718	0.796705
cg02248763	DUSP8	CCCCCGCTCCGCTGCCAAGCTGCTTCTGGAGCTCCTGCCCCTTTCCCATTGACCACCCCC[CG]AACTCCACTGCACACACACCTTGTTTAGGACGTCCTTCTGCGAGCCCAGGTAGAGGTGAG	0.187691	0.392657	0.280873	0.197327	0.160857	0.552488	0.620272	0.54627	0.808116	0.307374	0.36934	0.302177	0.197273	0.271357	0.43983	0.891972	0.90079	0.910119	0.881159	0.888336	0.877431	0.915638	0.884596	0.914913
cg15599668	SYNPO	TCCTTAGGAGATCTTGGTCTGGTTCCTCCCCTTCTCTGGTCCTCAGTTTTTCCATCAGTA[CG]AAGGGGATGGCCTAGGATCACTCTAGCTTGATATTCAAACTTCCCCCAGGAATGTTGTTT	0.45382	0.532652	0.477665	0.490918	0.511092	0.672945	0.769656	0.815531	0.79729	0.727866	0.536969	0.535003	0.570249	0.535826	0.820546	0.67628	0.658585	0.738131	0.719593	0.726817	0.708058	0.726139	0.705893	0.724433
cg16671682	NACC1	ACATGATGGGTGTGGAGCATGGCTTCGAGACCGCCAGCCACGAGGGCGAGGCGGGTCCCT[CG]GCTGAAGCCCTGCAGTAACCCGCCCAGCCTCCCGCGGGGCCACACACTTCCCCTCCCAAC	0.630096	0.616362	0.587625	0.533594	0.552837	0.857984	0.762595	0.841938	0.884287	0.783577	0.584519	0.571775	0.538533	0.57381	0.802613	0.897255	0.862894	0.893769	0.862275	0.884536	0.872261	0.879862	0.868548	0.90185
cg25616547		CTGTGGAGAGGTAGGGCTGGGTGATTTTTTTGCTCCTGGGAGCCTTGGAAACCCAGACAG[CG]TTACTGACCTGGTTGGCGGAGGTCACCGCGGGCGCCAGGCGTGCGCGGGAGCTGGAGCTT	0.507011	0.649328	0.624488	0.576944	0.611489	0.863518	0.881306	0.819358	0.898849	0.714935	0.651892	0.61554	0.565002	0.525209	0.667505	0.195665	0.180349	0.161489	0.168097	0.160156	0.156177	0.219386	0.198357	0.202885
cg13688770	ZFYVE28	GCACTCACAAAGGGCGTGTCCCCCCCAACTACCTGCACGCAGCAGGGGCCTCTCAGTGCA[CG]CAGGGTAATAAGGGTAACAACAACGCCAGCCTCCCCAGGGTCTGCGCCAGTCACCCAGGC	0.362996	0.426449	0.393501	0.324385	0.267098	0.675205	0.546744	0.738624	0.835986	0.291993	0.421261	0.42787	0.334403	0.295601	0.46339	0.55554	0.436014	0.613497	0.691843	0.734742	0.650042	0.814278	0.772827	0.795874
cg16330369		CCTGCTGGTTTGCTAACTTGCTGTTGGCTTTACTTCAATAATATTGAGCCGAGCCTGTAA[CG]AGAGAAAGAGGAGGAGCTGATCTCACTGAGAAAAAAATACACTGCTGTGATAGAACATAC	0.193506	0.223409	0.209567	0.1874	0.249552	0.450697	0.345761	0.462667	0.515479	0.378453	0.204246	0.199423	0.230233	0.214731	0.562419	0.685818	0.687343	0.676044	0.65826	0.641602	0.679633	0.598546	0.533751	0.676717
cg04343927	LOC100130872-SPON2	ACAGAGCGGAGGAAGGAGCTCGGGAATGGTCTTGCTCAATCCTTCCCGGCCTCTGCTCAT[CG]GAATCACCCAGAGGGCTTTTAAGCTTAGACAAAACACTCTGATGTTTGGAACCCTGTTAA	0.325024	0.444442	0.295365	0.27492	0.372149	0.465547	0.591485	0.573104	0.579821	0.42132	0.43052	0.313617	0.221603	0.39757	0.494504	0.849838	0.858239	0.850337	0.865049	0.87477	0.83121	0.845382	0.814803	0.900046
cg01369895		CTGTTACTTGAGACTTTCAGACCTTGGAATAATTGCCTGTGTTTTGACATTCTTCTGTAA[CG]TTGGGGAAATAAATGGAACTAATGGGAAAAAAACTCTTCTAGGACATTCTCAGATGTAGC	0.337089	0.466672	0.393819	0.310966	0.400827	0.651907	0.674937	0.737214	0.613528	0.527777	0.484133	0.402846	0.367535	0.473439	0.620509	0.832133	0.835984	0.83024	0.860662	0.846408	0.853888	0.85075	0.795459	0.866174
cg13291811	ZSWIM4	CCTGATGAATATCATGCAGAACTGGTATTCCTTATTCACACCAGTGGAGGCGGCTACCAT[CG]TGGCAGTGACGGGCACCACACACGCCACTCTGCTGCGACTGCAGCTGGACACATCGCGGA	0.475314	0.461746	0.39387	0.395473	0.400648	0.73577	0.711693	0.680517	0.780074	0.490304	0.439291	0.4149	0.398121	0.382599	0.649782	0.821273	0.782558	0.767513	0.790453	0.816077	0.795514	0.807981	0.72962	0.814534
cg17093877	MGC16275	GGGATTACAGGCATGAGCCTCCGTGCCCGGTGCATCCCTAATCTTGAGCATGATCTCAGT[CG]GCAAATGAGGCCATCTGTTTTCAGCCTGTTTGAAAATAAGATGTGGGGAGGCCATGATGG	0.287556	0.338597	0.263339	0.258004	0.163498	0.517904	0.499112	0.470431	0.57812	0.428064	0.321694	0.299777	0.256775	0.228078	0.35106	0.78452	0.786903	0.766601	0.768938	0.72184	0.739081	0.776319	0.696209	0.747309
cg00220294		AAAATTGAGAGTAACGTTATTTTCCGGGATGTTTCCTAGGTGTCAGACCTCGAGCCTCGA[CG]GCCCTGAAGTCATAGTGTTTGTACAAAGTGGTGGCACCAGACCAGGAGGAGCTGAGAGCG	0.467215	0.524244	0.568095	0.500051	0.504829	0.667614	0.836241	0.694469	0.799157	0.870017	0.602225	0.551828	0.498876	0.535752	0.867588	0.242729	0.24456	0.269534	0.289097	0.261009	0.246221	0.252872	0.212669	0.241477
cg02592271	KRTCAP3	CGCCGCCCGGGGGCCCAGGCGGCTGATGCGTGTGGGCCTCGCGCTGATCTTGGTGGGCCA[CG]TGAACCTGCTGCTGGGGGCCGTGCTGCATGGCACCGTCCTGCGGCACGTGGCCAATCCCC	0.436898	0.500165	0.527534	0.464053	0.45866	NA	0.88075	0.789832	0.656642	0.496042	0.501194	0.520542	0.450344	0.402417	0.481754	0.0365677	0.0318693	0.0303512	0.034452	0.0315711	0.0275164	0.0356071	0.145709	0.0234852
cg09813986	ZFR	CCGGACATACCTCTTGCTATACCCTTTCCTCGACCTGCACCCACTCCCTGAGCCATCCGG[CG]TATATCGGTCACCCAGCAGGGTGTCAGGCAGTGTTGTAGGTGCTGGAGATACGGCAGAGA	0.6726	0.825488	0.750608	0.661177	0.611433	0.869862	0.91205	0.93158	0.929638	0.918043	0.807808	0.763681	0.660095	0.662325	0.895363	0.115389	0.106283	0.108641	0.12634	0.121748	0.13021	0.0974894	0.149055	0.0961334
cg26498966	MKNK2	TTTCCCCCACTTTAAAAAAACTTTTGAGGTTTTTTTTTTTTTTTTGTCTTTTAAAAACAT[CG]TAACATTAACACATGGCCGTTCACCGTCCCCCAGCGATGGGAGCTGGCCTGGGGCCCAGG	0.355546	0.474786	0.270919	0.392762	0.397444	0.734424	0.622952	0.789495	0.74169	0.774387	0.408206	0.30248	0.450066	0.403725	0.801503	0.933145	0.912511	0.885538	0.8917	0.913441	0.891876	0.943732	0.907666	0.874838
cg08454455		TTTGTGTCCAGGGCATAGCCGATCTCCTTTTCGTTTTCACGAGAACTGCGACTTGGGCCT[CG]GGCACTAGGCGAGCCCAGGTTGTGGCCTAACAGCAGATCGCCTCGGGAGCTTGGCTGCAG	0.446418	0.579375	0.548832	0.520358	0.562757	0.828414	0.839855	0.675211	0.85724	0.978824	0.622175	0.526382	0.538365	0.590149	0.977272	0.156371	0.149096	0.175162	0.164745	0.166233	0.167035	0.152405	0.175189	0.119484
cg13071185	TSPAN4	CTTCCCAAGATAGGTCCTGCGCTGGCAGCCTCCGGACAGCGTTCTGTTTTGAACTTTAAG[CG]GAGATGCTACCTCTGGAAGGCCGGGGAAGGACAGAGCCTGCCTTCTCCCCAGGATGGCCT	0.463649	0.533333	0.501806	0.349975	0.432652	0.792076	0.860317	0.653662	0.865014	0.878584	0.494793	0.509964	0.346932	0.426753	0.803606	0.945657	0.943007	0.956841	0.949438	0.95256	0.947167	0.93973	0.928423	0.948597
cg16650212	CACNA1H	CTGAGGACAGACCTGCTGGGCCGCGTTGGCAGGGGCTCACCCCGTCTTCCCGCAGGAAAG[CG]CCTTGGCGGGACTGCTTCCGCCAGCTTCCCGGCCAGACCCAAGGGTGGAGCTCCAGGCCA	0.577075	0.597093	0.593976	0.587525	0.482897	0.905362	0.81899	0.75068	0.939263	0.930648	0.58583	0.577882	0.622884	0.506045	0.933974	0.913645	0.925395	0.924648	0.901157	0.913321	0.911852	0.898737	0.894002	0.901738
cg12937133		GACGGGGACACCCCACTGTGGCCTGTTACCCAGAGAAAGGTGCTAAATGCAGCGACTCCA[CG]TGTGACGAGATCCCACCCGCCTCGGAGCATAGAGGCAGTTAGACAAGTCTGCGACTCGGT	0.528649	0.591966	0.513204	0.503097	0.610874	0.753631	0.912607	0.693813	0.903899	0.946976	0.613714	0.498459	0.535958	0.589474	0.856189	0.93969	0.953226	0.952885	0.951252	0.938458	0.919353	0.944288	0.886398	0.957745
cg07740525	KIF12	TCATACCTGCACCTAGCGGCTGTTCAGGACTCCTCGAACCTGTCTGAAGATCTGCTTACC[CG]TCGGGTGACCCGCGTTCTTCCATGTCCTGCTCTGCACACGGAGTTAGCTCCGCCCGCGTC	0.563062	0.560112	0.558998	0.587601	0.49888	0.801681	0.807145	0.790737	0.77406	0.799705	0.545562	0.606353	0.576242	0.520856	0.793082	0.222019	0.219942	0.216529	0.254156	0.251412	0.234463	0.208812	0.286946	0.202653
cg02903275		TGACCAAGTGATTGAGAAACAGCTCTCTAAACAGGTGCGTCTGAGCTGGGTTCTGAAAAA[CG]AAAATAAGCCCACATGTGAAGAGCTAGGAGATGAGCATTTCAGACAGGAAACGGCTTAAA	0.211257	0.258141	0.231359	0.170335	NA	0.444911	0.715653	0.483852	0.568012	0.439514	0.268925	0.212521	0.193521	0.236801	0.587627	0.753588	0.758583	0.755565	0.71992	0.759653	0.722179	0.746764	0.626356	0.70195
cg09971674	LIPC	GATCCAGTTCATCAACCAAACTGAGACACCAATACAAACAACTTTTACCATGTCACTACT[CG]GAACAAAAGAGAAAATGCAGAAAATTCCCATCACTCTGTGAGTAGGAGGTGTAGCCCCCT	0.366274	0.452701	0.372121	0.338608	0.398617	0.601386	0.637665	0.685396	0.573847	0.655395	0.443607	0.428696	0.404708	0.456126	0.662586	0.836069	0.832661	0.838831	0.809421	0.820654	0.829239	0.811251	0.725149	0.836145
cg14625581		TTCCCTTCCCTTCCCTTCCCTTCCCTTCCCTTCCCTTCCCTTCCCTTCACCGGGAAGCAG[CG]GCCGCGATTTAATATGCAAAGGTGGAAAGTCTGGCATTGGGTGCATCGCCCCGCATGCCG	0.505533	0.61215	0.663236	0.471746	0.583799	0.8949	0.906446	0.768754	0.864244	0.933834	0.600524	0.692003	0.493452	0.571999	0.923266	0.0277868	0.0367532	0.0274915	0.0286429	0.0342909	0.0324377	0.0399705	0.039351	0.0392053
cg25326319		GACATGGGCTTAGACTGCCTGGTGCACCCAGACAGGTGCGTGCCGCAGGGACAGAGTATA[CG]ATGTGTGGTGTGGGGCGTGACCCACTTCCTGGTGCAAGAACACATACACGCCTGTGGACG	0.600931	0.597712	0.624929	0.562249	0.597272	0.822956	0.810816	0.807841	0.800345	0.825901	0.585806	0.627992	0.567951	0.560941	0.842093	0.800288	0.805739	0.817197	0.809922	0.816256	0.816706	0.82203	0.771601	0.804251
cg06138439		GCCCATTCCATAGAAAATCCTTGCTATCTTCTTTCCCAGTCATCTTCTTAATTCCCCAGG[CG]TCGTCTTCCACTTCAATTGGAGGTTTCAGAAAAAGACGCGAGGGCCGTGAAAAAGACCAG	0.542125	0.640486	0.542968	0.535512	0.543573	0.861051	0.846806	0.758859	0.867742	0.884524	0.649494	0.54277	0.554282	0.637117	0.896286	0.252147	0.254287	0.273202	0.29385	0.286811	0.271041	0.258193	0.254965	0.253474
cg01040719		GCACCACCATGCCCGGCTAATTTGTTTATTTTTGTACAGGCAGGGTTTCACCATGTTGCC[CG]GGCTGGTATGGGACTCCTGAGTTCAAGCCACCCACCTGCCTTGGGCTCCCAAAGTGCTAG	0.378745	0.393906	0.429203	0.429351	0.388777	0.523294	0.645748	0.636678	0.64451	0.222361	0.383205	0.440305	0.455663	0.385027	0.206184	0.666261	0.624156	0.624995	0.614825	0.633412	0.627674	0.663333	0.600007	0.65396
cg22547158	STK38L	AGTGAACAGTGTTTGCTGCTCTGTACACTCGGACGAACTGTGGTTGCTACTCTGTACACT[CG]GACGAACTGTGGTTGCTGTCTTCAAGGAGATGTGATCCAGTGGGAGAGAAATATACCTAC	0.498351	0.541006	0.584392	0.455133	0.501443	0.843814	0.689495	0.878906	0.710111	0.789644	0.523896	0.57638	0.457142	0.544722	0.89742	0.818955	0.842126	0.843409	0.834137	0.856757	0.823804	0.86265	0.840386	0.855428
cg00491255	TEPP	ACTCTGAAACCCCCCTGCCCCAGCGAGGCCTGGCGAGGAGGAGGGGCCCTCCTGGGAGGG[CG]CGAGCTGCTTCGCTCTGGAGAGATCCGCCCCTGGCAAATGTGCAGCCCACTGGGGTGGGG	0.572246	0.6701	0.676854	0.545144	0.64769	0.86303	0.863192	0.818462	0.808373	0.79664	0.624601	0.682431	0.54408	0.683023	0.789416	0.115118	0.102816	0.136323	0.105432	0.167811	0.157274	0.163566	0.176736	0.225799
cg23215587		CCCAAGTGTGGGGTGAGGAATTCCACAGGACTCTCAGCCTGCTGGAGTTCCCAGGCGAGG[CG]TGCTGACTCGGGGCCAGGCCTGAGCCACTGCTCCCAGGGGACTCCGGAGGTGGCCAAGGA	0.213116	0.268596	0.179645	0.26978	0.333203	0.454179	0.500256	0.651518	0.555783	0.383053	0.209298	0.222744	0.239652	0.25117	0.656777	0.853804	0.815853	0.812053	0.833524	0.840183	0.828427	0.7233	0.716854	0.833675
cg19358442	ALX4	TGCTTCTCACCTGTCTAGTGGCACCACAGGACGGTCGGCTTCCACTCGAATTCCCCCGGA[CG]GTATCATCACATAGCCGGGTCCTCGCAGTGTTGGTTTCCCAATCCGATGACTGTCACCTC	0.463726	0.625891	0.572802	0.500641	0.53213	0.843349	0.801386	0.765617	0.860631	0.390431	0.643915	0.571769	0.480596	0.575666	0.204439	0.106219	0.112979	0.102931	0.103652	0.106245	0.109877	0.105812	0.124474	0.0940169
cg02200717	RNASE7	CCTTTAGGTTTCCAGACTGGCTTGCTCTTTGGCTGACCTTCAATTCCCTCTCCAGGACTC[CG]CACCACTCCCCTACACCCAGAGCATTCTCTTCCCCTCATCTCTTGGGGCTGTTCCTGGTT	0.383157	0.480155	0.405021	0.350091	0.41467	0.582335	0.685901	0.568226	0.617209	0.812114	0.473521	0.432967	0.374707	0.432828	0.819186	0.776997	0.776466	0.745011	0.753981	0.777445	0.766024	0.77677	0.726668	0.779097
cg11313780		GCCCACCAATGACAGCCCTGTCTTGCTATCCTGGGGGGCATGGCATGGGTGGGCGGGGTG[CG]ATGGGGTGGAGGGAAGGAAATCCAAGCACCTGTGGATGCTTACTGCCTTACTCTGTCCTC	0.385047	0.462513	0.496478	0.490262	0.450711	0.613161	0.839311	0.788135	0.863448	0.561713	0.498507	0.485045	0.476998	0.419585	0.723418	0.832424	0.824835	0.848589	0.82737	0.841097	0.81309	0.844138	0.768545	0.837177
cg09586924	ST14	CTGTGATGTGGTGGCAGGAGGTAACATGCAGCCAAGACCCGGGGCCGCCTTGTCTAGCCA[CG]TGATCTCAGAGATGTTACTCAATATCTCTAAGCCTTGGTTTCTGTGGCTATAAAATGGTG	0.296048	0.340805	0.212555	0.137945	0.286681	0.390321	0.556785	0.554384	0.582485	0.454405	0.305051	0.215868	0.129843	0.303742	0.424087	0.808132	0.8105	0.825334	0.818992	0.7861	0.802629	0.828853	0.773151	0.8153
cg10566578	UNC119B	AGAGATGCCTGTCTTGGTGGCTTTGGTGAGAGGGACTCAGCAAGCAAGGCCTGGCAAGAA[CG]TCAAGAGGCTCTGGGGGACGGTTGCAATTTTACTCTAGCCTGGCTGAGAGGTGATGTCAG	0.373128	0.274391	0.321789	0.27344	0.201323	0.416378	0.528814	0.510019	0.532847	0.187385	0.229405	0.346682	0.279255	0.209185	0.20434	0.77902	0.786577	0.771576	0.779516	0.786821	0.781454	0.77803	0.709686	0.779029
cg02043105	SH2B1	GCTGCCTTCTCCCGCCGTTTTGCTGAGCTCTTCCTGCAGCACTTTGAAGCCGAGGTGGCC[CG]GGCCTCTGGCTCCCTGTCGCCACCCATCCTGGCTCCCCTGAGCCCTGGTGCGGAGATTTC	0.617275	0.641472	0.651033	0.668535	0.649612	0.866045	0.879775	0.828856	0.88208	0.921085	0.635925	0.660719	0.681552	0.648269	0.919512	0.847444	0.852318	0.854519	0.830392	0.831883	0.82617	0.868371	0.812187	0.865857
cg24871089	RPH3AL	AAACAACAGCCGCCCGCAGCTGTCTGTCTCTAACACGTATCAGACTTTGAAAAACATATC[CG]GAGGCAAAACAACCTGCCTCAGAGAAGCCCGGCAAACACCCACGGAGTCTCTAGCCCGTC	0.185857	0.335099	0.223296	0.120977	0.169143	0.452578	0.420623	0.559621	0.586081	0.485895	0.300629	0.246044	0.114806	0.192519	0.255818	0.74027	0.742627	0.774436	0.738369	0.772263	0.782022	0.747068	0.74424	0.73948
cg15896892	ZNF238	GCAGGTGCAGCATTCATTTTAAGTGACTGGAGCAGGTTGTATCAGTTTATTAATTGGTCT[CG]TTGAACTGAAGTACTTTCCAGGATTTCAGAAAGTGCAGTTTCAGCTTGTTGGTACCGAGA	0.378022	0.449865	0.405874	0.397718	0.400416	0.661828	0.637954	0.587322	0.731494	0.79451	0.446992	0.44261	0.426199	0.482037	0.669722	0.694855	0.695717	0.704469	0.686454	0.683959	0.646087	0.747156	0.650212	0.700372
cg03677069	SNCG	CTCCCTCCCTCCCTCCCCGCCCCCACTGCACGCAGGGCTGGCTGGGCTCCAGCTGGCCTC[CG]CATCAATATTTCATCGGCGTCAATAGGAGGCATCGGGGACAGCCGCTGCGGCAGCACTCG	0.250927	0.313214	0.172535	0.251541	0.367488	0.598956	0.573848	0.577274	0.567495	0.77042	0.269936	0.204328	0.23876	0.310279	0.477124	0.900922	0.887501	0.928666	0.925324	0.907997	0.891198	0.883464	0.801008	0.780317
cg23545105	OCIAD2	CGAGTACCCCACCTGTCTCCCCGGCTTCCTTCCGGCCCTTTGTGTTTTCTTCTCTTGCTC[CG]CCCCCTCGCCTGCCCGCTAAGCACTTAAGCTGGTGAAGTCACCCTACTGCCACCTGGCAG	0.421644	0.406223	0.450524	0.465943	0.48033	0.606976	0.595726	0.738337	0.758626	0.760129	0.388271	0.480501	0.550375	0.390652	0.509936	0.132328	0.143178	0.155661	0.172636	0.148054	0.137987	0.114989	0.197523	0.122391
cg02329430	NPTN	GGGGTTTTATTTCCTTTTGTGGTTTTAAATCTTGGTATATTCACAAGTTAAGCTCTACTG[CG]TCTGGCAACACAAAAACCCATCTGTATCTCTTTCTAATTTGGATCCAGTAACCTTGTAAA	0.645962	0.584417	0.58358	0.614059	0.593786	0.815156	0.832006	0.773269	0.841989	0.860289	0.593506	0.582565	0.568171	0.641007	0.839758	0.81932	0.818375	0.806871	0.816717	0.813691	0.824192	0.843721	0.794635	0.830759
cg14145185	MIR24-2	CCAGGGCAAGATACAGGATTTTCAGGACCCGGTGCAAAATGAACACGTGGTCCTCTAGTT[CG]AAAACTAAGAATTTCAGGCCAAGCATGGCGGCTCACGCCTGTAATCCCAGCACTTTGGGA	0.50534	0.536137	0.521556	0.399907	0.456127	0.580028	0.743738	0.728218	0.732938	0.607812	0.539823	0.525659	0.38369	0.472728	0.807096	0.851755	0.86879	0.877763	0.861562	0.862976	0.849143	0.863486	0.84823	0.862261
cg20160996	FERMT3	GCCAGGTTCAAGGGCAGCAGGAAAGACGAGATCCTGGGCATCGCCAACAACCGACTGATC[CG]CATCGACTTGGCCGTGGGCGACGTGGTCAAGACCTGGCGTTTCAGCAACATGCGCCAGTG	0.641006	0.700321	0.674813	0.708724	0.682228	0.888809	0.852589	0.922928	0.917447	0.888387	0.685225	0.671068	0.709328	0.692037	0.945245	0.916118	0.887084	0.948775	0.914704	0.908287	0.890034	0.921635	0.8725	0.914101
cg19706320		AGCTGACCCAGGACAGAGGGGCAGGGGCTGCGACGGGACCCATGGGTGGGCTCAGGATGC[CG]TGGGCCACTGGAACCGCATGCAGACGAGTGTGTGTGAACACTTAACGGCGGGGGAGAGCA	0.586872	0.562302	0.490216	0.453687	0.499187	0.843451	0.778038	0.940307	0.912563	0.870442	0.506166	0.501905	0.453184	0.522568	0.710002	0.912412	0.901375	0.916536	0.903376	0.920468	0.896823	0.911183	0.8739	0.926928
cg16525277		GGAGACACCCAAGTTCACTTTTAAATCATTTCTCCGCGTGCCAGACGCGGCTTTTGAAGT[CG]TCTGCACCAACCCACAGGGAAGCCAGCGCCCTGGCCCCAACGAGCGGCCCCACTGTGTGC	0.316619	0.189367	0.291326	0.128674	0.168659	0.541503	0.467475	0.824538	0.807904	0.615212	0.176237	0.346017	0.123512	0.154091	0.462151	0.874489	0.876846	0.907097	0.883681	0.90868	0.854192	0.925185	0.77712	0.891945
cg19955173	TNK2	GCACACCCACAACCCTCCCAGGAGCAGCCGCTCCCGGCCCCTCCCACTGCCCGCCTTGCC[CG]GGCGGTGACCTAAAACACCAGCTCCAGAGACACACGCCCCAAACACAGGCCACTCTGAGT	0.320107	0.438318	0.376121	0.192354	0.335998	0.927452	0.749963	0.791805	0.878677	0.937181	0.416271	0.387109	0.206601	0.41611	0.938557	0.926907	0.937345	0.948475	0.950078	0.928112	0.933368	0.946564	0.915079	0.951828
cg17896965	KRT9	CTGGGTGTGCCCTTGTTCTGTGCCAGCCTCCCCCCACAGACCCGAGGGAGGTCTGGGATA[CG]GAGGCAGCCGGGCTGCCCCAGGCTCAGCGTCCTTTGGTGACTGCCTGGGGGCGGCCCAGC	0.220931	0.381153	0.288888	0.358883	0.404933	0.588438	0.482322	0.630895	0.732476	0.204457	0.339676	0.296848	0.352547	0.363471	0.486869	0.885669	0.881506	0.882654	0.850236	0.877408	0.86339	0.875493	0.815252	0.853326
cg00351119		GCTGCCAGGCTGTGGCCCCACGCCAGCCTCTGCCATAGGGCTGTGTAATCCTGGGGAAGG[CG]TTCAACCTCTGTGCCTCAGTTTCTTCACCTATTAAATGTGAGTGATAATCGTGCATCTCC	0.267389	0.3808	0.301498	0.184647	0.288321	0.504977	0.716663	0.55582	0.534816	0.748714	0.39507	0.291272	0.227473	0.286251	0.612178	0.795655	0.791741	0.77852	0.800843	0.794809	0.772301	0.819404	0.741433	0.808333
cg26576576	PTPN14	TTCAAATTAGTAATATTCAAATTATAGAGGGCCACAGTAACTGCATAAATGTTCTACAAT[CG]ATTTTAAAAAACGGTTAAAATTTTTATTGCTTCTGTGTCTTGAAAGCTATTTTAAATTTC	0.492018	0.528534	0.533486	0.442917	0.402345	0.836515	0.78757	0.822083	0.757603	0.38016	0.505091	0.428774	0.444455	0.487241	0.625965	0.80491	0.8397	0.81186	0.82707	0.84834	0.837952	0.864329	0.845125	0.875437
cg08819431		GGGCCTGGGAGTCTGGACACATGGGTCCCTGCTTATTTCTTGGTCACCATGTGTCAAAGC[CG]TGTGTGTGTGTATGTGTGTGTCCTTGCTAGATGACCTTGGCCAGGTGCCCTTACCTCTCT	0.40198	0.505846	0.47187	0.464518	0.346357	0.566896	0.765661	0.790553	0.656497	0.385188	0.492889	0.449914	0.460233	0.378273	0.532495	0.875674	0.882002	0.917666	0.876865	0.884829	0.882404	0.868162	0.849105	0.867739
cg07398661	CSNK1A1P	CAGGCATATGTTTAATTGATTGTTTTAGCAGACAGATGTCTGGTTTAACATTCCTCTGCT[CG]GAGGAGAGGCTCAGAGACAGTGAGCCCATGTTACTTTTGATAGTGACTGAAGCCTTTGCC	0.224556	0.278424	0.234833	0.219146	0.266116	0.507637	0.544418	0.412967	0.484653	0.480509	0.291007	0.258392	0.233727	0.236242	0.334732	0.680032	0.702741	0.705669	0.711138	0.70912	0.686923	0.665972	0.568826	0.725386
cg05212706		CCCAGCCCAGCATGGGGGGGTGGCCAGGCCGGCCGGGGCGGGACGCTGCCTGGGGCTGGA[CG]CGGAGGAGCCCCAAGCCCTGCTGGGTGGGTGACAGCCGCTGAGGCTCTGAGTGACCCTGC	0.511753	0.533208	0.432886	0.402808	0.463788	0.880604	0.595204	0.709904	0.787403	0.941175	0.456592	0.459362	0.428484	0.454071	0.971085	0.91415	0.917377	0.943823	0.933677	0.921142	0.912108	0.910531	0.839357	0.935263
cg26034919	KRTCAP3	GGGCGGGGGCCGGGCTCCCGGAGAGCCCAGCAGGCCAAAGGCTTTGTGTCTTCCACAGAG[CG]TTTCCGTGGGACTTGTGGCCCTCCTGGCGTCCAGGAACCTTCTTCGCCCTCCACTGGTGA	0.551954	0.56716	0.572827	0.490114	0.460504	0.846395	0.786108	0.791474	0.836961	0.748943	0.56578	0.598419	0.495355	0.463863	0.558203	0.208609	0.202107	0.182589	0.214901	0.187618	0.184002	0.186055	0.202687	0.173394
cg26344982	BHLHE40	CCCAGCTCTCCGGCCAAAGGTTCGGAAGGTCCTGGGAAAAACTGCGTGCCAGTCATCCAG[CG]GACTTTCGCTCACTCGAGTGGGGAGCAGAGCGGCAGCGACACGGACACAGACAGTGGCTA	0.376366	0.427678	0.424506	0.225958	0.381965	0.889478	0.874697	0.630012	0.90566	0.929755	0.448118	0.427215	0.241025	0.423084	0.923562	0.917432	0.923453	0.937532	0.918117	0.930602	0.923524	0.947398	0.89316	0.937643
cg03517776		CTCTGGCGCAGGCCCCTCCAACCACAACATCCTGAGCTCTTGGCAACAATTGTTTGGTGA[CG]GCCTCAGCTTTTAACTAGAATTTTGGAGAAAAGCTGCAGTGTGTCTTTAACTTGTTAAGC	0.247143	0.303792	0.256042	0.244571	0.184275	0.455429	0.42642	0.548337	0.377058	0.429466	0.282606	0.320415	0.281012	0.23921	0.631822	0.661464	0.674634	0.726286	0.734964	0.699894	0.713166	0.638215	0.780664	0.668771
cg26172195		CCCCGCCCCCGGGGTTTCGTCACTGGCCTGGGAAAAGGCTGAATTTGGAGCCCTGTGGGC[CG]TGCACTTGGTGAGGACTGGTGGGTGGGGTGTGTCCCGGCTGCCAAGGGAGGAAGGCACAC	0.530465	0.582871	0.558072	0.474922	0.580555	0.757486	0.673458	0.863911	0.875166	0.674848	0.607996	0.584815	0.470692	0.532097	0.280367	0.855523	0.846577	0.880743	0.881462	0.885896	0.853915	0.863265	0.844173	0.898973
cg05877550		GAGTTCAGTCGGCTTTTTAATCAGCAAGACCTTTGATCCAGCAGGAATGAGTAATTAGCG[CG]GAGCCGGGAGTGGGCAGTTGCAGGAGGCGGAGGCCGTGCTGTGCGGGCTGGCAGGAGGCG	0.563968	0.701144	0.554639	0.54616	0.568433	0.833532	0.816002	0.833403	0.807486	0.832441	0.674846	0.59587	0.568262	0.665702	0.829649	0.153869	0.158536	0.146732	0.142826	0.152318	0.147517	0.144787	0.17468	0.160653
cg09288273	NIPAL4	TGAAATGGAAGGAAGGGAGGAAAGGTGGAGGGGAGGAAGGAGAGGGGGAGGGTAGGAGGG[CG]AGAAGGAAGGAAAAGAAGGAACCCAGGTTCCCAATTGGCAGCAGTACCCACTTCCAACCC	0.668597	0.537129	0.554654	0.597992	0.51886	0.854498	0.813434	0.797903	0.804781	0.696886	0.551256	0.584215	0.601276	0.525999	0.52106	0.182489	0.181448	0.177461	0.200246	0.217815	0.212312	0.188679	0.187027	0.167225
cg20903926	C1orf177	GGGGCCAGGGAAGGACCCTGAAAATGTGCACGGACAAGTTAAAAATCAGCGGGCTACGTG[CG]CACGCCGGTGGGGGCGCCACGTGGGCGAGGGCGAGGCCCACAGCTCCGGGGCGCATCACA	0.570117	0.63224	0.635925	0.564014	0.625564	0.853308	0.819841	0.81841	0.841059	0.539166	0.622479	0.646966	0.568773	0.585636	0.545396	0.839037	0.820074	0.837616	0.823499	0.85053	0.835807	0.872315	0.836353	0.873393
cg02013841		CTCATGGAGACCAGTTCTACTCTGAGAGAGTTTTCCAATCTGGCTGTAAATTGGGGTTAG[CG]AGGGCAGCCTCTATCCTGCTAAGAAACAAAGCCAGCCTTTTATAGAGCCAAGAAGCTGGC	0.390905	0.336967	0.349432	0.444113	0.357268	0.522799	0.559325	0.626203	0.649889	0.551886	0.372763	0.348266	0.428908	0.326315	0.679495	0.54736	0.535113	0.466394	0.495492	0.579987	0.501046	0.665139	0.68908	0.727252
cg21194021	TSNARE1	TCCTGTCCACCAGCCCCGCAGGGTGGCTTACAGCTTTTTAATGCGTCTGACTTAGAGAAG[CG]TCGGGTTGGGGGAAGGCAAGTCTACCAGAGACAAGGATCTCCTGTACCTCCCGTTTCCCT	0.534365	0.559457	0.607865	0.560045	0.576763	0.746266	0.784028	0.777143	0.843737	0.407659	0.598619	0.624237	0.529813	0.532449	0.705735	0.799809	0.795643	0.822017	0.813615	0.80016	0.7898	0.805985	0.757002	0.790697
cg13941235	RXRA	GTCAGCGCTGGGGAGCCAGGCCGGTGCTGGTGTTGCTGCCTTGCTGCCGCCACCTGAAGG[CG]TGTGTGCCGGCCAGCGCCTGTGTGCGGGGTCCTTACCACTGTGTGGTTTAACCCTTGCCA	0.392811	0.471224	0.418263	0.33444	0.444903	0.653196	0.600128	0.704095	0.540784	0.471933	0.446452	0.436684	0.347651	0.472003	0.411821	0.781716	0.762725	0.82011	0.791015	0.744984	0.747543	0.763552	0.75315	0.798437
cg15735030		AGCACTCTGGAGGAGTAGACAGGGAAAAGCAGGAGAAAATCCACAGCGTAGCACAACTCA[CG]GTGCCAGCCTACCATGCTTCATAACTATGTGCAACTCCAACAAGACTGCATAGAAAAGAG	0.330324	0.414239	0.317653	0.211381	0.376368	0.744547	0.788152	0.582393	0.809407	0.622224	0.425003	0.338645	0.250638	0.33396	0.826668	0.866535	0.850823	0.911385	0.831279	0.838998	0.84404	0.876126	0.81131	0.854534
cg11251215	RNF220	TGGTGTCAGTGCAGCGCATTGATCGCCCGCCGGGCGGGCCGGGCTGCAAGCCGGGCAGCG[CG]TGCTTAATGTGATTGAAAGGCAGTTAAAATGGCGGTGACCTTTTCAGGAGGAATTAGATT	0.544222	0.555437	0.564286	0.558681	0.520366	0.815125	0.782699	0.808407	0.823066	0.852118	0.569375	0.582728	0.556451	0.5534	0.835373	0.802739	0.799072	0.79014	0.790795	0.793854	0.80295	0.812962	0.732647	0.802163
cg05001531	RBPMS	GTGGTGGAAGTCGGAGCGAGTCTCCTGGGCCCGAACCGGCTGTTGGAAGTGCGAGGGCAC[CG]AGAGCCACGGTACCTGTGAGGGATCTCTTTAACTTCCTCAGATGGGATGGGGGAAAGATC	0.639899	0.693287	0.725621	0.755612	0.768702	0.911181	0.945754	0.90334	0.957385	0.776232	0.683991	0.719767	0.767846	0.692963	0.68783	0.313397	0.277946	0.155094	0.190203	0.24591	0.223368	0.242083	0.328331	0.18761
cg23768131		CCACTCTGCAGCGCTTCCCTGGGGTTATTATTCCACTACCAGCTGCATAATTATTTCATC[CG]TAATTATTGGACTCAGCCCAGCTCACTTCTGCCCCTGGCCTTTGCACTTGCTCTTCCCAG	0.371628	0.476337	0.360825	0.314691	0.378872	0.773388	0.62809	0.746926	0.796668	0.55244	0.468492	0.37908	0.319811	0.40141	0.532058	0.761511	0.751013	0.759825	0.775451	0.793115	0.760407	0.793269	0.748983	0.790368
cg17974515		CGTGCTGGCCTCGCAGGGTGCCTGGGTGACTGCTACAGGCCTGGTCTTGAGGCACTGAGA[CG]AGCCACCCCATGTGTCCCGCCTGACCCCACAGGCTTCCCAGGGCTCTGCGCAGATCGGGG	0.489042	0.526957	0.395709	0.442985	0.454182	0.676697	0.737057	0.784507	0.758221	0.859604	0.511221	0.473598	0.478726	0.480065	0.785158	0.799285	0.797746	0.833172	0.802017	0.799274	0.798697	0.799797	0.772339	0.791176
cg14139051	CDK14	AAATGCATGAACAATTTGAGCCCTGTATTACCTTATTGCCTAGTAGTGCCTACAAATCCT[CG]GATAAAGTGAATATGCTTCATTTCCTCTGTTGACAAAGAGTCAAACTCTGTAAAATATTT	0.452566	0.572687	0.510437	0.497185	0.469312	0.829299	0.647264	0.71527	0.847677	0.768012	0.606185	0.50327	0.516577	0.575652	0.800319	0.826836	0.84056	0.837677	0.841101	0.833866	0.821226	0.843279	0.793286	0.837687
cg22741735	CXXC5	TATTTCTTTTTGGGGGCTGGATGTGTTCCTGGCAGGGCCGATGATGGATGCGCCCGCCGC[CG]CCCGCCTGCCCGCCAGCTTTCCCTCCCGCTCATTCCCGCTCCGCTTCAACGCAGCCCTGA	0.301223	0.498706	0.36531	0.332547	0.427972	0.607247	0.758919	0.852227	0.84762	0.742191	0.487657	0.427229	0.359852	0.444536	0.881645	0.902797	0.891236	0.925117	0.919457	0.90176	0.876002	0.907993	0.882895	0.887723
cg25620901	HEATR2	GGTCAGAAGCAGCGTGGTTCTCGTGGCAGGGCGGCACTTGGCCCAAGACTCGTGCTCTGG[CG]GGAGGCTCAAGTCAGGCGTCCCAGCAGCTTCGGTGCAACGCCTCCTGCCCGGCTGCGTGG	0.365007	0.539543	0.536296	0.467179	0.417324	0.790467	0.680126	0.639897	0.874861	0.635322	0.563459	0.51692	0.467895	0.462263	0.580381	0.94181	0.948439	0.94462	0.953592	0.967946	0.950917	0.952612	0.946775	0.945508
cg06134860	SLC12A4	AGGGGGCGGCAGGAGGGAGCAGCAGCCCCAGCAGCAGCGTCACCCACTGCCATGGGGAGC[CG]GGCGGCCCCATTCCAGCCCTGGTGCCTACTGCCAGAGAAAGCGGCACTGGGCTGTCCTTA	0.419708	0.53194	0.389162	0.458537	0.542404	0.664506	0.71427	0.734146	0.728353	0.729349	0.482801	0.428223	0.478766	0.479556	0.785567	0.898641	0.886169	0.915405	0.899188	0.891612	0.884816	0.916539	0.890442	0.946875
cg22558871	NSUN5	TATATATATATATAATTTTTTTTTGACACAGAGTCTCACTCTGTCGCGCAGTGTCGCAAT[CG]CGGCACACTGCAACCTCCGCCTCCCGGGTTCAAGCAATTCTCCTGCCTCAGCCTCCCGAG	0.413709	0.45617	0.417054	0.383132	0.399959	0.775245	0.621653	0.56513	0.69425	0.404883	0.435125	0.424645	0.328249	0.480796	0.622904	0.691312	0.668863	0.705574	0.706947	0.661747	0.642293	0.630655	0.628487	0.687405
cg02188160		TAAAGCATGAGAAAATCTGCCATTTTTTTTTAAATCACAAAAGGGTTTCTATAGATGGAG[CG]GTAAGAAGCTGACAGCTTTTTATGCATAAAAGGCAGCTGTTCCTTCTCAGGTAATATTAT	0.5288	0.570688	0.509477	0.542368	0.627604	0.805505	0.673345	0.92276	0.847143	0.895557	0.527801	0.558784	0.552582	0.622777	0.893831	0.885536	0.860262	0.869973	0.904954	0.892862	0.883669	0.884713	0.843063	0.886236
cg07009981		GGAGGAAGCCGCACCTCACTGAGTCATGCAGCCTGTGAGTGGGAGAACAGAATTCAAACC[CG]GCTGGGCTCCATCAGACCCAGGTACGAGGGCTTCCTCGCTGCCTCCCCAGCCTCGTCATG	0.419037	0.393252	0.407185	0.311077	0.356295	0.598286	0.520118	0.674957	0.784307	0.424664	0.41305	0.435809	0.329972	0.36652	0.420559	0.821954	0.827405	0.814279	0.812678	0.803726	0.794563	0.765729	0.677712	0.755984
cg07092111	EPC1	CTCCCACAGTGAACAAGGGTTGGTCTGTGTGACCAACAGCACATGGCAGAAGTGATAGTA[CG]TCACTTCTAAGATTGGGTGATAAAAGACTTGCGTGCTGTCTTACCACTTGGTACACACTC	0.466811	0.517292	0.480165	0.431675	0.523289	0.730253	0.681215	0.634486	0.741542	0.827697	0.524239	0.507199	0.445234	0.516564	0.690368	0.822212	0.815041	0.822082	0.807953	0.811751	0.779485	0.812811	0.747371	0.830338
cg09548718	XYLT1	AACAGGCTCTGACCAAAGTTGCTGGACCAGTTAAACCACTACCAGTTACTTCTTTGCCCA[CG]GTGAGTAAGGCTGCTTGGGAAGGTAACCTATTTTCTCTGAATACTCTCAAAGCATTCAAG	0.267422	0.247819	0.213701	0.225348	0.238571	0.392503	0.447817	0.48264	0.450237	0.27134	0.234795	0.266189	0.270376	0.216752	0.350419	0.676595	0.640138	0.730187	0.655277	0.600695	0.622926	0.558412	0.714395	0.712498
cg12151545	MYBPC3	CACTGCCTCCGCGCTGCCAGCGCACCTTCACTCCTGCCCGCTCTGTCTCGGCCTCGAACA[CG]GCAGGGCTGCCTGCGGCCACTTCCACTGACCGTGGCTTCTTGCTAAAAGCTGAGACTGAA	0.522124	0.500956	0.573612	0.603166	0.564353	0.815287	0.734854	0.802964	0.848178	0.795213	0.483925	0.606391	0.584572	0.496	0.541942	0.835877	0.819939	0.837058	0.838518	0.849497	0.847308	0.846986	0.810781	0.831119
cg05830220	KLHDC4	GGCGGGTGCACGTGGCTGCAGACAGCAGCTGCTGAGAATGACACGCGACTCTGATGAAAG[CG]ATACAGCTTAGCCGGTCTGGCTGTTCACCGTCCTGCTGCACTCTACGACACATCTGCTGG	0.416785	0.44393	0.350587	0.221558	0.391021	0.521921	0.694737	0.653004	0.696157	0.834411	0.463571	0.3677	0.238519	0.453336	0.819114	0.909624	0.927953	0.905306	0.926027	0.939566	0.925271	0.931579	0.914022	0.908286
cg15441392	EBF2	GTTGGGTGGCAGGGTTGATACCTGGGGTCTCTGACACCACCAAGTGGTCCGGCATCCCAC[CG]CTGGGCCACTCACCATCCCGTCTTTAGTCGAAACCGAAAGACCCCGGCTGCAGACAGAGG	0.601392	0.555793	0.604476	0.758746	0.67826	0.874543	0.888402	0.848846	0.934131	0.916439	0.548176	0.629925	0.731151	0.598633	0.927325	0.116718	0.112567	0.110843	0.10899	0.122812	0.113018	0.122446	0.146197	0.134519
cg26903766	DOT1L	TCCGGGTGCCATCACGGGTCCTGCAGATGGCCATGCAGGGCTCCTGCCCACGCAGGCCAC[CG]TATGTTCAGGACACGCACTGGGTCTCAGAGCCACTGGCCCAGGCAGAAGTCTCCTTGAGC	0.518544	0.546328	0.547476	0.473269	0.564777	0.680155	0.758912	0.815955	0.811531	0.83391	0.518843	0.578886	0.469449	0.522722	0.807217	0.801092	0.789754	0.785606	0.795899	0.804971	0.802706	0.809222	0.761005	0.812491
cg15107203	ADAMTSL4	TGGGGGCCGGTCCATCATCAATGGGAACTGGGCTGTGGATCCCCCTGGGTCCTACAGGGC[CG]GCGGGACCGTCTTTCGATATAACCGTCCTCCCAGGGAGGAGGGCAAAGGGGAGAGTCTGT	0.406312	0.489878	0.446712	0.471216	0.443491	0.80682	0.56101	0.679407	0.696583	0.484242	0.46917	0.457785	0.480629	0.47096	0.261136	0.797407	0.778551	0.771743	0.824421	0.802194	0.800394	0.778498	0.705556	0.809642
cg07358254	IQSEC1	TACTTGCTGATCAGCGGAAGAAAGCCTCTTCCCATGTGTCAGAGTGGCTCATGCCCATGC[CG]CCTTGCTGCTGGGCTCTGAGCTCTCGGCGACAAGTGCTGCCCTGTGGTGCTTGCCAAGAA	0.453442	0.514178	0.422191	0.403118	0.456733	0.781321	0.786354	0.669118	0.817236	0.814016	0.511706	0.484621	0.4267	0.50324	0.828346	0.759567	0.734096	0.734159	0.744837	0.765153	0.744001	0.764173	0.713943	0.762948
cg11864574	SPAG6	GCACACAGGCAAGTGTCAGGTTGAAAGTCGAGGCCCTAGGAATTGCCTGGAGTCATTTTA[CG]TGAATGGGACTCTACCCTAATGAGACCCATTTTATCCAAGTGCCATTTTGCATGCCACCC	0.525289	0.601409	0.618209	0.569644	0.74069	0.806413	0.769365	0.845814	0.896451	0.836806	0.679272	0.665941	0.582981	0.686519	0.881765	0.0788181	0.0776833	0.0856752	0.090611	0.101108	0.082804	0.0730384	0.122482	0.0887274
cg22887880	SUSD2	GAGCTTCGCCCTCTGGACATCCGGCTCATCGCCTGCCAAAGGTCCTGTGGCTGGAGGCTC[CG]GCCTCCTCACCCTCCCACAGGGTCCCAGGGCCGATCCAGGCCTGCGGGCCAGGAATGTGC	0.394399	0.433738	0.385903	0.388629	0.34103	0.591375	0.573222	0.531761	0.754768	0.614758	0.426458	0.419914	0.387236	0.363499	0.705138	0.78215	0.776218	0.810845	0.79458	0.793458	0.772504	0.783282	0.670256	0.783716
cg18380742	NFIA	TAGAAGTCTATCATAGGATTGTTATAAGGGTTAAATAAGACATTGCTTATGAACCTTATA[CG]TAGTGGCTTGCTATTATTCTTGTATTAACAAGGTTGTCCTGGCATTTCTTCCTACTGTTA	0.349779	0.478202	0.340369	0.321251	0.456935	0.566668	0.692881	0.700761	0.623005	0.433632	0.463	0.362418	0.377401	0.523892	0.683613	0.878908	0.864046	0.856946	0.871801	0.869057	0.857855	0.853058	0.835579	0.89195
cg02299946	HTRA1	AGTTGGAGCAAGTCATACACGGATCTGGAGACAGAGCTCTCGAGGCAGGAGCGGGTGCTG[CG]ATTTCAAATATTATAAGGTGGCTTTGTCTGGGGCAGAGCATGCCAGGGGATGAGAGGTAG	0.579902	0.659887	0.582736	0.523449	0.572561	0.786926	0.89467	0.86762	0.925658	0.907581	0.672041	0.598789	0.508992	0.579936	0.909926	0.902286	0.88722	0.901217	0.894503	0.905621	0.865011	0.893046	0.886656	0.906916
cg09735627		ATGAAGTAGTCCGAGGAAAGTGACGATGAAGACAGAAAGAATCTCCTGGTCTGTGCTCGG[CG]GTCCAGGAAAGGTCTTGAAAGGAAAAGTCTTTGATGTGGGCAGAGCCTTCAGCAGCAGAT	0.685737	0.649903	0.684222	0.641989	0.612088	0.881903	0.901197	0.891162	0.881876	0.670527	0.662236	0.652945	0.649283	0.598217	0.692382	0.876321	0.872453	0.865304	0.879813	0.860737	0.870181	0.879928	0.849225	0.869316
cg03840467	2012-09-09	GATGGGACCGTCCAGCAGCGCCCAAACTTGGCGACTCGGGTTCACGTTTTGCGCTCAGGA[CG]CCGCCCGCGGCTGACATCCTCACTCCACCCTAGCAGGGCCCGCCTTAAGTAGGCGAAGGG	0.76041	0.8754	0.749562	0.672043	0.718874	0.959611	0.97198	0.973717	0.962425	0.952056	0.853114	0.7896	0.655257	0.811843	0.973543	0.258625	0.27037	0.242621	0.238078	0.284821	0.29168	0.22775	0.295609	0.204858
cg23018236		CGGCCTCTGGCTTTCGTGGGGAGGGCACCAAGGCTTCAGGTTTCCCAGCTCGCGCGTTAC[CG]TTCAAAAGCCCCTCCTGGAGCTCTGAATTGAGGGGAGCACTCCATGCCCCTTCCTCCAAA	0.510025	0.512647	0.586458	0.409516	0.492806	0.9122	0.813422	0.699023	0.902951	0.599056	0.511336	0.599721	0.422925	0.498762	0.492468	0.863107	0.800012	0.641409	0.788335	0.850118	0.864107	0.898616	0.889151	0.907586
cg11043002	COL23A1	AAGGCATGGGCACTGAGTGGCATCCAGCGCCGGTTAGTAAGTGACAGGAACTGGACTTCA[CG]CGTTGTGTCCAAATGCCCCTTTCACCCACGTTGGTCTAGTAGCCATCTGCTGACCGTATA	0.534447	0.629439	0.629654	0.572838	0.601412	0.825591	0.840691	0.87257	0.836753	0.523142	0.580658	0.648372	0.562133	0.591023	0.514105	0.851247	0.852677	0.86148	0.849336	0.862292	0.846496	0.852869	0.848892	0.879645
cg07312051	FHAD1	GCCCCAACAAAGGTTACTGGGACTTTTTTTCTCACATGGTTGCATGACTCTAAAATGTCG[CG]TTGAATCTCAGCATGATGGGACATCTGTTGAGGAAGTCTTCCTGGGTATCTGGCCAAGTC	0.401514	0.505203	0.447094	0.369323	0.46153	0.864012	0.667297	0.637035	0.693179	0.614491	0.495788	0.449006	0.365881	0.470866	0.634031	0.816134	0.824513	0.828246	0.843286	0.816794	0.807772	0.804183	0.756729	0.798818
cg26800986	ISLR	GGCCACGGGTGTGATTCCACAGAAAAGGCCTGGTGTCTGCTGCGGTCATGGCCGGAGGAG[CG]GGAGAGGGCGGGTGGAGTGGATGGGGGTGGTGTGCACTGCACAAGGGGCCTCGTCTGGGC	0.29867	0.415552	0.287282	0.237719	0.364015	0.679924	0.564287	0.537215	0.487273	0.205091	0.340075	0.293212	0.258142	0.395661	0.11849	0.826642	0.831855	0.835174	0.822327	0.825576	0.820418	0.828246	0.746874	0.842597
cg02057755	AGBL4	GCTAAGGGATTTTCCTCCCTGGAGCCTCCCTTCCTCTCCCTGTGTTCTAATCCTCATTTC[CG]GGAGGTCATTTTAATTAGCAGGCTGTCATGGTGACTCAGCCTGCTGTTTCCACAGACAGG	0.226523	0.272475	0.176104	0.134729	0.193912	0.457875	0.631217	0.469498	0.590303	0.692869	0.252599	0.200244	0.156927	0.218039	0.24292	0.806971	0.815727	0.797555	0.779422	0.767761	0.764771	0.71875	0.602831	0.77394
cg04952072		CTCATCCTGATCCGGGGAGCCTGGGGGATGGCAAGGGGCTAATGTGCTTGTTGGGAGTGA[CG]CTGTCTCTGCTAGGGAGCAGGAGGTCAGTGGGGACAGTACGGACTAAACTCATAATTGGA	0.444502	0.478185	0.477865	0.363169	0.429873	0.738792	0.794247	0.55781	0.818146	0.862602	0.45602	0.497842	0.383106	0.43959	0.853043	0.797831	0.787418	0.80233	0.767165	0.798038	0.780472	0.814885	0.746548	0.840437
cg04441577	LPP	TATTGGGAAATAAGGTTCAAGTAGTAGGTTAGGACCAATCTAGGGAAGGCTGTCAATGTC[CG]GCTAAAGGCTAAGAACGTTATTGTCTATAATGAGCCCTTGCACATTGAGATCACATGCCA	0.496655	0.590046	0.462085	0.519144	0.550713	0.626823	0.754819	0.751497	0.845506	0.866308	0.548899	0.455961	0.501599	0.525076	0.856085	0.866256	0.862078	0.84358	0.86323	0.859939	0.845835	0.848396	0.819451	0.84685
cg24040155	LRP5	AGCAGATGTGTGTTGCCGGGAGGAGGAAGGACTGCTCCAGTCAGGGCTGAATTTCCCACC[CG]GAGCATTTCTGCTGTATTTGGTGTAGCGCCTGCTGCTTAAAGCTCTGATTCCCAGTTGGC	0.586231	0.641017	0.625925	0.560769	0.550617	0.853314	0.760117	0.817299	0.832325	0.601028	0.653877	0.656312	0.558438	0.599275	0.837601	0.855556	0.838553	0.837726	0.841869	0.851225	0.847093	0.852946	0.833176	0.857488
cg18399451	ATXN1	TGATACACACACATTTACTGGTTTATGGTAGGAAAACTGCTCTGGCTGGGTACTGGCACT[CG]CCTTTGTGATTCAGGCATGAAACCATGAGGTGCCCAGCTGGAATTCAGAAGAAGTACATT	0.394725	0.423101	0.288368	0.260378	0.356004	0.762874	0.836286	0.523834	0.616894	0.414724	0.452366	0.294404	0.275274	0.429611	0.188468	0.774311	0.784366	0.781382	0.766368	0.779711	0.75749	0.779896	0.759116	0.801555
cg06866423	BACH2	CCCCATAATAAAGTATTACTGGTCCAAAATGTCAATAGTGCTGAGATTGGGAAATCCTGA[CG]GGGAGGGAACATTCAAGGATATGGGTAGACTTAAAATCATGCCAACTCATAATCACATTA	0.472441	0.513069	0.35052	0.386028	0.487746	0.580386	0.655957	0.696188	0.673312	0.754596	0.492946	0.456414	0.441185	0.486944	0.80686	0.865531	0.853862	0.861095	0.8951	0.894868	0.856078	0.866767	0.890483	0.869776
cg02048922	BAI1	GGATGATGGTCCTGGGGACTCGGGCTGCGTGGAAGGGTCGGCAGGTGGGCTCTGTGGAGA[CG]TGGTCAGATGAGGTTTCGGGTTGAGTATGCTCTCGGTGGATGAATCACCTCTGCCACACG	0.301049	0.35461	0.368973	0.186593	0.198084	0.595011	0.647331	0.518304	0.859001	0.138416	0.343003	0.409319	0.180383	0.339212	0.201513	0.900416	0.892724	0.886886	0.902613	0.894042	0.916304	0.892378	0.800421	0.919878
cg13311890	STAB1	CTGCTGATATGCAGGAGGAAATCCTGGCGGGTTCCTGTGGGGGTGAGCTGGCGGGGCCTC[CG]GGCTGCTTTTAAGGCCACTGCCCGCCCCGTCCCGCCTGCCTGTGCTGTGCCTGCCTCCTA	0.618323	0.641836	0.659899	0.545478	0.594357	0.856582	0.775531	0.899547	0.854948	0.695545	0.653335	0.656542	0.542685	0.587389	0.837978	0.908237	0.925037	0.928837	0.908848	0.92027	0.92208	0.926835	0.881557	0.932316
cg09262442	C10orf18	TAACGGTGCAAGAATACCCTTCTGTCGAAAAACTGCCTTATAGGAATGGGTGACTGTATG[CG]GTATGTCCTGTACTGTACATCAATAAATAACTAAGCCAGGCCAGAAAAAGGGTGACAAAA	0.385091	0.338236	0.374203	0.386094	0.262028	0.50996	0.692741	0.580303	0.638601	0.226749	0.306313	0.37026	0.361351	0.238315	0.612032	0.77587	0.831802	0.741569	0.782305	0.796871	0.786216	0.791386	0.688387	0.779607
cg19999682		CTTGCAGCCTCCTTAATTTATTTATAGATGCGCTCGCTCTTTATGTGGCCTAGTTAAGGA[CG]CCTTTCCATAAATACATAGAAACGGATGTTATTCTAGAGCCCACCAATAATAGACACAGC	0.541442	0.501018	0.543373	0.628198	0.478297	0.832012	0.772427	0.659376	0.860186	0.761518	0.495812	0.615432	0.607166	0.431194	0.899042	0.865598	0.831164	0.856427	0.866943	0.83732	0.790655	0.91406	0.880328	0.899734
cg23573900	CXXC5	TCAGGCGCAGTATTTCTTTTTGGGGGCTGGATGTGTTCCTGGCAGGGCCGATGATGGATG[CG]CCCGCCGCCGCCCGCCTGCCCGCCAGCTTTCCCTCCCGCTCATTCCCGCTCCGCTTCAAC	0.458757	0.586091	0.470432	0.493925	0.486816	0.676147	0.767851	0.772243	0.812859	0.656339	0.549829	0.484644	0.49432	0.514426	0.762578	0.832837	0.819169	0.851003	0.832001	0.834477	0.84201	0.868571	0.804763	0.844003
cg12658387		AAAATGGCCTGGGAGGGAAACGGGTGGCAAATGACTTGGGAGGTGGTGGTTGGGCGGGGC[CG]TGGGATGAACTGTGCTCACGTGAACGACAGACTGCGACGTTCTTCAGTATTTTTCAAATG	0.455396	0.430367	0.428086	0.229586	0.360835	0.690102	0.668661	0.726673	0.938858	0.943105	0.439334	0.441395	0.237294	0.365333	0.877889	0.964254	0.953972	0.96943	0.959731	0.954373	0.949498	0.952961	0.921134	0.959919
cg06614257	TMEM88	CATCTTGCTACCCGCTGTCACCATGCTGGGCTTCGGCTTCCTCTGCCACTCTCAGGTGAG[CG]TGCGCCCCGGGGTGTGCGTGTGAGTGTGAGTGTTGGTGTGTGGTGATGCTGGCGGTGGGG	0.688595	0.638489	0.798411	0.715706	0.626788	0.917901	0.838342	0.923627	0.906898	0.891103	0.696445	0.7851	0.713981	0.615723	0.927666	0.0562112	0.0508572	0.0474873	0.0530538	0.0866234	0.0533449	0.0508158	0.21692	0.049906
cg07490070	ANKRD23	GTCCCTTGCAGGCGCTCCACCCGCCCTCGGGTCAGGAGCCAGGGCTGCGCCCACACTCAC[CG]CGTTCCGCACCCCCAGCTCGGCCCCATAGAGCAGCAGTAGCTTCATGGCTTTGTAGCTGC	0.226491	0.406745	0.411151	0.271373	0.170828	0.790438	0.574702	0.903165	0.641976	0.159038	0.395991	0.410376	0.286342	0.152118	0.23231	0.882445	0.790329	0.874801	0.922053	0.925091	0.872308	0.956038	0.939135	0.967714
cg09883286	USP44	TGGGTGTAACTTCAGTGGCGATGACGGCTGTGAATTGGGTTTTTTCGCACCGCAGAAGGG[CG]AGAGAGGTTCCAGAACGGGCACAGGAAGGGAACCGCTATCTAGAACTGCCTAACCCGAAA	0.402609	0.377818	0.397123	0.342734	0.481754	0.589912	0.814056	0.799001	0.587755	0.723577	0.356843	0.420253	0.336126	0.398112	0.624495	0.0780645	0.095418	0.0816442	0.0790997	0.0660394	0.0886816	0.0779369	0.0970045	0.0685976
cg10399899	RGS19	CCTGCTTGGCCACGGGTGGGCAGACCCAGGAGACACAGCACTCCCCACTGGGTCTAGGAC[CG]TCTCCGCGGGTGGGGACCCCAGCCGGCCAGGCATGTGCCCTGACAGCCCTGCCGACAACA	0.622147	0.629973	0.676556	0.612275	0.678229	0.861859	0.840536	0.858015	0.854323	0.774833	0.629056	0.674107	0.634556	0.622141	0.763829	0.867234	0.850016	0.853177	0.843875	0.853784	0.848605	0.850235	0.833329	0.854084
cg19961766	KLF13	AGGGCCTCAGCCTTGGGATGTCTTCCTGGTGGGTTCATCTCCCGCTTCAGGCTCTGGCCC[CG]CGCGAGCCTCTTGACTAGAATATTGGCGCAGGGGCTCTGGAGACCCGGGCCTCCCGCTGT	0.463135	0.523816	0.485224	0.440607	0.41524	0.565903	0.778982	0.825174	0.839545	0.66991	0.519769	0.505577	0.428584	0.468026	0.3565	0.206861	0.20714	0.195422	0.201123	0.207346	0.184813	0.214739	0.183268	0.20186
cg01516872	TH	TTAGTGATGGGAAGAGGGCGATGTCTTGATGGACAGTGGCATCGGCTGCCGGGGAGGGAA[CG]GCAGCTCAGGAAGGAGCTGCCCCCACAGGGCCCCAGTGAACAACCCCCCTACCCTCCTGG	0.546629	0.497289	0.572413	0.48501	0.574219	0.841622	0.662322	0.799261	0.86346	0.575925	0.518818	0.574966	0.501182	0.495337	0.703993	0.846078	0.839747	0.821943	0.846702	0.866496	0.830045	0.842182	0.790218	0.849661
cg16234986	ATP10D	TCACTGATGTCATATCATTTATTATCCTCACAGCAGCTGGCATTCATTCCCTGAAATCGT[CG]TCTCCTGATAAACAATAATTTAGAGATATGTTCACTTGTAAATAAAAAGGTTAGAATCTA	0.418299	0.533564	0.49561	0.381773	0.467468	0.616794	0.869218	0.841954	0.719562	0.752557	0.581087	0.476295	0.387391	0.50801	0.838127	0.862771	0.858287	0.866723	0.837665	0.851612	0.851208	0.841804	0.815365	0.839454
cg25726425	UGT1A10	AACTTGGATGTTCCCCAGAGTGAGCACAGGGTCAGACGTGTTTTTCAAGATAGTCATGAT[CG]GTCTTTTCCAGGGTGGGGCCCACAGTGAAAAACAGTGATAGATTAATGGTTAATAATTAA	0.488721	0.5905	0.480997	0.484286	0.524486	0.809698	0.783595	0.874263	0.772862	0.823298	0.624719	0.503545	0.517667	0.670292	0.832591	0.87575	0.867375	0.852869	0.859845	0.869247	0.846118	0.878842	0.803765	0.882665
cg08973950	C7orf50	GGCAGCAAGTCAGTATCACATCAGCAGGCGTGGGCCGTGGTGAGCCTCTCCCTGCCCTCC[CG]CTGGAATAGAAAGCTGATCCCGACGTCCCACTCCGACCCACGGTCAGGAAGCCGTCCTGT	0.506544	0.536991	0.490273	0.377784	0.38475	0.927651	0.893017	0.848072	0.842277	0.920596	0.525221	0.548462	0.352544	0.482397	0.921082	0.9274	0.901964	0.921185	0.936767	0.913066	0.909034	0.92037	0.890046	0.911295
cg23698269	SBF2	CTTAGCAAAGCGTCTAGTATATAGTAGGTGCCTACAAAATATTTTAAATGAGTAAATGTG[CG]ATTTTCCCCAACGACCAGCAGGAAGCCGCAATGGCTCCAACTCTGAACTGAGAGAGTTGA	0.697955	0.644472	0.644686	0.575064	0.587705	0.895406	0.829129	0.856954	0.813967	0.452379	0.678238	0.647251	0.652343	0.66926	0.826785	0.32846	0.336498	0.309607	0.328327	0.365384	0.365959	0.338663	0.301549	0.298431
cg03748042	MGMT	ATGGAGGAGGCAGAACGCGTGGATGTGGCCTTGCGTTGTTGGACTCGGGGTGGGGTGGGC[CG]TGTGGTGCAGTCTAATGACTGTGTCGATATTTCTGGGAACTGTTTTCAATAGTGAGTGCT	0.52702	0.55027	0.557245	0.565173	0.548067	0.808167	0.795176	0.75333	0.778201	0.534835	0.585148	0.578183	0.562909	0.56978	0.806306	0.753526	0.744214	0.725425	0.740273	0.710192	0.718952	0.742275	0.693388	0.76366
cg00714115		CACTTCTTTCATCACTGTTTATAATTTTCTACCCATAGATTTTTCACTTCTGGCCTGGGA[CG]CGCGCGTCTTCAGGGTGGAAGCCTGGCGCGCGTCCGGAGGTGCTGAGGAGCCAACCGGCC	0.610241	0.678237	0.687497	0.589314	0.648916	0.867814	0.847496	0.847092	0.915887	0.778313	0.689463	0.71678	0.586743	0.675438	0.614706	0.906876	0.87502	0.891489	0.884614	0.932893	0.902776	0.899879	0.911684	0.902084
cg07477296	ZNF788	GCCCAGCCCCACTCCACCACTGGTATCTCTAGTGTCCCTGACTGCTAGTGCCTCAGCCAC[CG]CCGCCACTGCGATTTGGAAGTCTTTTAATGCAGTTAAATTATCTTAGTTTTTTCTCTCCC	0.545745	0.543868	0.523756	0.567377	0.56693	0.832261	0.796467	0.786199	0.618746	0.523333	0.500072	0.517567	0.573098	0.496534	0.224501	0.709313	0.685145	0.761682	0.719606	0.717425	0.66241	0.729994	0.803647	0.818112
cg01653532	YPEL2	TGAAAGCTGCCAGCTTTATCCACAGCTGGCCTTTCCCCTTCAGATGCCAAATGTTCCAAA[CG]ACAGGTACAACTCTGAGAGGGCCGTTAAGGTTCATGCCAGAAACATTCACCTAGGAAGCC	0.521838	0.563906	0.547033	0.496316	0.43943	0.728686	0.722753	0.724982	0.699018	0.452118	0.588014	0.580551	0.494871	0.529778	0.63056	0.192877	0.20137	0.186195	0.193606	0.202552	0.232316	0.183018	0.188557	0.227605
cg25324068	TNFSF13	CCTTAGCTTGCTTTCCTCCTCCCTCCTTTTTATTTTCAAGTTCCTTTTTATTTCTCCTTG[CG]TAACAACCTTCTTCCCTTCTGCACCACTGCCCGTACCCTTACCCGCCCCGCCACCTCCTT	0.363734	0.48319	0.376556	0.425922	0.406432	0.636649	0.66031	0.676277	0.638648	0.408871	0.446833	0.410375	0.426402	0.415208	0.58062	0.702098	0.703009	0.665154	0.679052	0.736159	0.722851	0.718011	0.687421	0.726253
cg21970789		GGAAGAAGCTCCAGTAAAAGATGCCAGCGTAGGCGCGGTCTTAGCCAGCTGTGGCCAAGC[CG]CCTCCACCTCCAGTTCAGGGCCGGGGCCTTTCCCGTCGCCGCACGCAGCAGGTGCTCTGG	0.535686	0.65904	0.536498	0.499138	0.516079	0.758372	0.828384	0.818343	0.845453	0.832033	0.656958	0.581894	0.52424	0.572204	0.822042	0.111456	0.115973	0.109608	0.127322	0.125487	0.11415	0.112718	0.179422	0.115026
cg04372674	AQP1	GGCAGGCCGACAGCACAGCCGTGTCTGCATCCATCCAGAGGAGGTCTGTGTGGTGTGGGG[CG]GGCCAGGAGCGAAGAGAGGCCTTCCTCCCTTTGTGCTCCCCCCGCCCCCCGGCCCTATAA	0.377733	0.474052	0.338678	0.317079	0.388593	0.628924	0.600042	0.61887	0.709188	0.808306	0.454674	0.42215	0.352709	0.398983	0.763979	0.816958	0.787915	0.829271	0.823194	0.829544	0.801419	0.815021	0.736789	0.786104
cg13707793	CXXC5	AAAGTTAATTAATTGGTGGTTCCGGAGGTGGCGGGCTCCACGCCCGGCCAGTCTTGCTGA[CG]TCAGTGCTGACCCACTGGAGACGTGCAGCTTCCGGGCAAGCTGGGCAGAGGGACCCCGGT	0.299051	0.498231	0.30473	0.232731	0.379096	0.554887	0.871849	0.737961	0.91017	0.750317	0.455088	0.316804	0.261719	0.434767	0.761067	0.953041	0.958335	0.964434	0.975719	0.958687	0.956869	0.966506	0.931839	0.959326
cg12329275	C10orf47	GAGTCTAGAGGTGCCTGGCTGGGGCCTCCTGGCTGAGCACGCACCGCAAGCTCCAGCCAC[CG]GCACAGAGAACTCTTCCCTAAAGGAATCTGGCCGAGGGCTTGTCTCCCTTTTCCCAAGAA	0.563211	0.666343	0.660713	0.629733	0.620047	0.903037	0.882349	0.923615	0.929998	0.912112	0.707547	0.664149	0.630081	0.648401	0.924965	0.622235	0.607648	0.768556	0.773819	0.762626	0.726652	0.878391	0.877444	0.900251
cg15103179	ITGA7	CAGCCTCTTTCCCAGCTACAACTTTCTTGGCAGGACAATTTTCCATGATCACAGCCAAGC[CG]TCTTCCCCAGGGGAGCACAGTGCTGGGAATGGAGGCTGCCTGGGTCCCCTGGGGCTGAAC	0.477897	0.46261	0.386243	0.462194	0.382862	0.804367	0.619489	0.745791	0.661335	0.821201	0.433605	0.427851	0.477361	0.401446	0.817835	0.725684	0.732591	0.700075	0.712391	0.75134	0.732644	0.747967	0.705549	0.761116
cg17875135	HTRA1	TGTGATCCGCCCGCTTTGGCCTCCCAAAGTGCTGGGATTACAGGAGTGAGCCACTGCACC[CG]TGCCAAAATGTACTTTATTTAGGTGACTCTTTCGTGGGAACCTCAAACAAGCAATCATTG	0.395217	0.492384	0.400134	0.329716	0.322395	0.856967	0.861725	0.576724	0.884389	0.285411	0.493627	0.406355	0.318623	0.437534	0.524039	0.841993	0.838094	0.836345	0.833699	0.821206	0.815726	0.834704	0.78411	0.849537
cg20577572		AGCCAAAACCCAGGCAGTGGGATGGTCATGTTAGCATCTGTTTTACAAGGGAGTTCCCGA[CG]CATCCTCCAGGATCATGGTTCGCTCAGCCTCACATTGCTACAAAGTGGGAATTTTACCAA	0.662277	0.685359	0.697295	0.668968	0.739676	0.899054	0.857175	0.95113	0.889595	0.554833	0.702128	0.718173	0.710386	0.667349	0.578018	0.877755	0.868362	0.887434	0.869352	0.875478	0.866563	0.888771	0.87352	0.89231
cg08923271		TCTGCAAATTTTAGCCTCGTTTTAATTTGTCGGGGCTGTTTATTTTTGTTTCTCAGAATC[CG]CGTGACGAGTGCACCCAGCACGTGGTAGAAGCTCAAGAAATGAGCAAGTGAACGAAAGAT	0.399809	0.433324	0.495107	0.413739	0.416843	0.577916	0.780798	0.767123	0.627113	0.78656	0.461297	0.511148	0.419289	0.418218	0.710159	0.2359	0.273296	0.204582	0.278575	0.244762	0.234937	0.171379	0.178017	0.107808
cg07228241	CHD7	GTTCCGAGCCCTTCTTGCCACCTGCCCTCCCTCATGGCTCCCGCTCCTCCTCACTCTGGT[CG]TCTCGGGAGGCCTTCTCTGGATGGAGACCTGGCTAGGTCCCCGTAACTTGACCTCAGCAG	0.644022	0.599576	0.670184	0.616237	0.60477	0.853794	0.813062	0.868903	0.814223	0.517185	0.577084	0.693425	0.620358	0.577392	0.424976	0.746645	0.699576	0.64283	0.588975	0.626036	0.61783	0.822721	0.818409	0.859693
cg03065175		ACCCAAGCGGATCTTGCTTGGCCTGTATGCGTTACTGGGGGAAATGGACGTGGGCCTGAG[CG]CGGCAGGTGCGAGGGCGCTGCCCCGGGGCCGACCACCCTGCGGGGACACTGTAGCTGTCA	0.620821	0.688979	0.737905	0.656543	0.711534	0.921332	0.886002	0.85325	0.924854	0.401004	0.760053	0.731752	0.661147	0.684333	0.524606	0.121326	0.110672	0.135498	0.10946	0.124086	0.0898193	0.186986	0.319487	0.148647
cg03306615	ASCL2	CCGTGGCTCCCTCCATCTGCAGTATCCCCCACCTCCAGCCCGTCCTGCCCTCCTGTTCTC[CG]TCTCGCTTCCCGTCGGTGCCTCCGGGATCTCACAGCCCTCGCACCTCTTTTGTGACCCAG	0.317776	0.288441	0.344056	0.224882	0.259473	0.603588	0.432139	0.63774	0.581989	0.243719	0.306129	0.383382	0.204333	0.244325	0.515406	0.483812	0.437842	0.620594	0.622062	0.615727	0.609061	0.744938	0.721703	0.906519
cg04120520	KIAA0182	CTTCCTCTCCACAGAAGCAGCTGGAAGAGAACTCGAGGGGCTGTGCTGCAGGCCTCCCCT[CG]AAAGACACTGGGAGGTCAGCATGTTCCACAGGTGTTCAGAGGGAGTCTGCTACAAACTAT	0.537419	0.604412	0.580619	0.470045	0.56451	0.893976	0.902009	0.86396	0.851152	0.280114	0.656335	0.557397	0.449138	0.591238	0.499875	0.88414	0.870136	0.880257	0.871188	0.873748	0.880542	0.862796	0.853731	0.888726
cg01376826	ZIC1	GGGTTTAACGCCCGAGTCAGGGAAGAATTTGCGGCGTTGAGTTCTCTCCGGCCCAGATTA[CG]CTATAAAATGTGAGTGTATGTAGGGAGTGGGGTGGGTTGGAGGAGGCGACCAGGGGATGC	0.622163	0.547277	0.572385	0.584501	0.411471	0.85465	0.887013	0.814634	0.835385	0.520423	0.60646	0.573943	0.597297	0.527176	0.820325	0.0480638	0.0674844	0.059305	0.0525368	0.0507181	0.0576376	0.0729837	0.0639081	0.0737024
cg14202338	GIPC3	CCCTGCCAGCGACGCTGGATCCCTGCAGAGAATCAAGGAAGGCAGTATCATCAACCGGAT[CG]AGGCAGTGTGCGTGGGTGACAGCATCGAAGCCATCAACGACCACTCCATTGTGGGCTGCC	0.607269	0.620584	0.678116	0.679622	0.66685	0.91874	0.808329	0.858076	0.87569	0.689009	0.614903	0.68644	0.702761	0.652538	0.507361	0.924492	0.915466	0.922038	0.911417	0.909254	0.908526	0.910902	0.859582	0.917947
cg01397912	C19orf51	GAATTCTAGGAATAGACCATAGAATCTCAGAAATGGAATTTGAAAGTCTACCAACACTCC[CG]GGGTGGGGGTGGCGGGTACTGAGTGGGAATGATTAGAATAAAATTGAGGACTCTAGCAGC	0.344402	0.495588	0.344627	0.355609	0.388587	0.859822	0.751187	0.529804	0.749142	0.553752	0.480128	0.329438	0.374851	0.424282	0.527943	0.810233	0.813017	0.820381	0.821648	0.822953	0.825157	0.80412	0.799753	0.749004
cg19922741		ACGATTTGCTTTTCACAACTACGCGTTAATGAATAGGGCAGCCCACCTCCTGGTTTGCCC[CG]GAATGCCCAGTTTCAGGCCTGAAAGTCCCACGGAGCATCTCCCATCCTCACCCTCGGCCT	0.457403	0.473633	0.443998	0.497031	0.441935	0.757557	0.746876	0.753082	0.763295	0.292459	0.470665	0.478121	0.490214	0.463259	0.403044	0.775076	0.769183	0.751314	0.768383	0.760668	0.759305	0.790775	0.679495	0.771864
cg20338386		TGACTGTTGAGCGCACGTTAGAAGGCGCCACGCTAGCGCATTCCCCTGCGGTATTTGAAA[CG]ACTCCTGTTACATTTGTTGGAGGAATGAGTCAGCAACCCTGAGAGCCTGTGACTCTCGCA	0.520457	0.558683	0.568253	0.554227	0.591469	0.763489	0.706841	0.842913	0.804329	0.797747	0.561799	0.57042	0.575885	0.602168	0.803986	0.827031	0.808576	0.802917	0.805086	0.794851	0.791975	0.750773	0.728735	0.717671
cg00619561		CACAGTGTTCCCTGACAAGAGCCAGCCCCAGCACGTGCACGACACCCACAGCGATGGGCT[CG]TGGAAAACAAGCTCAGCCCGGCTCACGGTGCCCGGAGATCCACCTGGCACCCATCAGTGA	0.456099	0.466211	0.416467	0.278907	0.372288	0.613737	0.714113	0.695112	0.628302	0.433317	0.476948	0.430128	0.289269	0.42697	0.46809	0.914108	0.923394	0.948253	0.933256	0.931717	0.906761	0.936217	0.835143	0.922057
cg08057038	MUPCDH	AGCCCCAGAATGTTTCCTAATGGATGACAAGGGGTGGGGCGGGGCCCTGCAGTACTTAGT[CG]AGGTACAGGAGGTGGCCCTGATGCCAGAGATAAGGATGAGGGGCCGCCGTGCCTGCAGGT	0.489192	0.442651	0.490591	0.484525	0.457454	0.701655	0.61884	0.703053	0.697068	0.337305	0.42656	0.485691	0.516034	0.41284	0.399168	0.786604	0.797583	0.802243	0.797759	0.78456	0.799225	0.786468	0.72779	0.868727
cg16284178	2012-09-07	AGATTCTGATTAGTCTCCTAATTATTATGTTTATAGTTAGCTTTTCATTTTAATGGGCTT[CG]TTTTTAAAATTTGGCTTAAGAATTAGTTTTATGAAATGAACAAAAGAGCCAAAGATTATG	0.462633	0.522933	0.517842	0.478724	0.554921	0.672883	0.626373	0.786778	0.773476	0.561299	0.591138	0.518843	0.537107	0.597266	0.699549	0.774754	0.776249	0.77323	0.783126	0.809652	0.768001	0.843144	0.755186	0.848293
cg27607512		CGCTCCTCCCTCCAAGGACGACTCCCCGTGTCCTTCTCCTGACCTGGCTGCTCACGGCCA[CG]CAGCAGACACAGACACTGTACACCCTCAAGGACTCCCGGCCCATTCACATGCATGTCTGT	0.418707	0.537268	0.513049	0.44862	0.473101	0.718096	0.587778	0.792985	0.776833	0.439862	0.527018	0.53204	0.446925	0.449902	0.227839	0.790291	0.806253	0.830748	0.821918	0.832064	0.832478	0.819422	0.755802	0.819451
cg26118208		AGAACACTCTGGGTCATCCGGGAGGTTCCTAGAGGAGGCGAAATGCATTTCCCAGAAAGA[CG]ACAAGCCGGTACTGCTGTTCCTCACAGGGACCCACTGGGAGGCAGGCTCTGCCTTCTCCA	0.377507	0.449923	0.407164	0.290093	0.347268	0.511779	0.842957	0.755634	0.837811	0.801933	0.496657	NA	0.311965	0.414099	0.754243	0.808531	0.819553	0.804439	0.804593	0.785903	0.790804	0.798548	0.722425	0.802517
cg01236751	AMPH	CAGATTATGTCACTCAATAAACCAGAAAGCAGACAGAAATATAAATCCCTGTTTCACTCC[CG]CTTTTGACATCTTGACATGAGACAAATGGTCATTTAATCCATGGAAACACTCCAAGTCAT	0.200516	0.380389	0.295668	0.171536	0.317766	0.529234	0.603435	0.53676	0.489418	0.400755	0.402568	0.324906	0.167032	0.340204	0.680188	0.832648	0.855617	0.857496	0.839998	0.833032	0.812588	0.823987	0.754776	0.827272
cg20897936	SCAND3	GGGCAATTCCATTGAAAGTGAAGCCATCCTCTGAAAAGACCAGAAATAGTGAGCACAGAG[CG]ACTCACTAAAGCTTCAGGGTCACAAATTGAGCGGCAAGATACTTGCGAGACAGAAAACCG	0.263731	0.308106	0.216295	0.259371	0.255443	0.544963	0.478983	0.716274	0.562393	0.120862	0.264539	0.241372	0.249836	0.225617	0.160907	0.0601714	0.074876	0.0743007	0.0614702	0.0655798	0.063167	0.0567776	0.0663289	0.0659747
cg22791453	ASS1	TGGGGGCTGCAGAAGGCCCAGGCTGCCGGCACCGGATAGAAGTGAGCACGAAGCTCCCTG[CG]CCAGTGGAACTTTTATCCCGGCTCCCACCGCGAAGCGTTTAAATTGCTTCCCCAGGGCCA	0.153225	0.21158	0.177304	0.151016	0.16769	0.285435	0.3532	0.46797	0.425946	0.452049	0.205933	0.183442	0.201518	0.187864	0.310024	0.322215	0.279415	0.326476	0.324325	0.327643	0.33088	0.329827	0.328263	0.358129
cg06095093	ROR1	TTTGAGTGCTTGGCTCTGTAATCTTGGAGACACTCTGCATACACCCCACAATTAAGACAT[CG]CAACTCCATGCAATGTTTCTTCAGAGAAAGTTAGATGCAATTAGATCATTTGAAGATGGA	0.495913	0.611424	0.499802	0.471039	0.53415	0.771076	0.704848	0.779823	0.798195	0.697273	0.569936	0.537073	0.486597	0.539556	0.817778	0.870587	0.862548	0.864338	0.854711	0.867456	0.874923	0.867983	0.856923	0.829937
cg14004197	EXD3	GTTGGAGCAGCCCCGACCTGCTGCTCCAGGCGGAATATTGATGTGGCCCTAACTGCGGAA[CG]TTCTGGAAGCAGCCCGTACCCTCCACCGGGAACTGCCGAGAGCCAGCACAGCCCACAGTC	0.597262	0.651294	0.642862	0.604069	0.625368	0.781398	0.83652	0.837675	0.866313	0.851069	0.604571	0.670009	0.615883	0.586458	0.850299	0.837467	0.841375	0.800626	0.810704	0.828714	0.778443	0.830834	0.778028	0.822355
cg26352161	PTK7	CTCACTCCCATCTGTTTTCTCAAATCATGTGCAAACACTTTTTCTTCTTCGGTGAAGTAA[CG]ATTAGGAACAGGAACCTTCACTGTCTTGTTCACTGCTGTATTCTTAGTACTTAGAGCAGT	0.560374	0.643072	0.618017	0.601827	0.636013	0.691205	0.840412	0.856499	0.890153	0.528298	0.645323	0.623816	0.61213	0.601122	0.871008	0.82452	0.81622	0.791478	0.829713	0.856662	0.820907	0.847827	0.810264	0.817786
cg18949192		GGGCTTAATTTCAAGATCTCTGGACAGAAAGGTCAAACTCAATCAGCCTTAGCTCTTCCA[CG]CGCTGTGGAGAGGTAGGGCTGGGTGATTTTTTTGCTCCTGGGAGCCTTGGAAACCCAGAC	0.59001	0.727111	0.681263	0.575454	0.663496	0.85663	0.825806	0.827427	0.887206	0.897513	0.727297	0.696925	0.595733	0.660188	0.887263	0.250974	0.216626	0.254208	0.25669	0.248688	0.216721	0.287795	0.225404	0.252794
cg21217423		GCGTGCGCAGCTTCAGAGGTGCAGTTTGGAACTGCCCTCCCCCTTTCAGTGTAGGACTGG[CG]ACACTCCTTTCTTCCTGCAGGTAGCAATCTCCAGGGACCTCCCTCAACCCTGTGGAGGGC	0.546893	0.48126	0.511636	0.572424	0.422177	0.636738	0.875226	0.828109	0.77799	0.638132	0.493603	0.568136	0.537595	0.434484	0.604449	0.154404	0.154043	0.132048	0.149425	0.160469	0.144026	0.152001	0.169052	0.168177
cg23793500	GPT	TTTGGGCCTGCCCTTCCCCTAGCATCCCTGGTTGGAAGGGTGTCCTCACAGGGCTGTGGG[CG]GGCCAGGGCTGGCTGCTGGTTAAATTTAGTGTGGGGGGTGGGGCAGCTGCCCAAGGTCCA	0.441746	0.560825	0.479355	0.45408	0.505695	0.687208	0.814202	0.798768	0.699523	0.480579	0.530534	0.516482	0.484689	0.491401	0.702457	0.771136	0.793474	0.755715	0.772613	0.7846	0.755156	0.802813	0.757356	0.781102
cg01364674		AAAGTTGATGAAGCTGTAGCACCAGGAGTCCAAGCTGTGAAGGAAGTTGAGTCCTTCCTC[CG]CCAGCAGCAGACTGTGAGCTGCAGAGTCAAATATGTAAGTAGCAATTATTGGTGAGGCTG	0.431498	0.52157	0.429514	0.401812	0.44219	0.618544	0.748709	0.58894	0.652161	0.629502	0.499044	0.474904	0.438842	0.449068	0.732346	0.758931	0.746038	0.748128	0.752549	0.763452	0.737104	0.782481	0.708477	0.758751
cg15638366	ITGA6	TTTATAGTCAAAAGAGAGCCTCAGCCTTTTAACCAACTTTCTGTGTAAACATGAAAATTC[CG]GGCTGGATTTGTTCCACTGTGAATTTTAGCTCACACTTGCCCAACTGGATTATCCAGTAA	0.447556	0.503849	0.438798	0.36185	0.39667	0.621059	0.868572	0.643627	0.699856	0.603025	0.505559	0.450008	0.412662	0.45295	0.601535	0.824454	0.839151	0.821246	0.827907	0.842806	0.826258	0.862836	0.856165	NA
cg01906944		TCTTCCCTGGCCACCGTCTTCTCCAATGAGAGCGATGACAGGATCTAAGGGGCCCCCTGG[CG]CTCTAAGGTCCTGGCCAGTGGAGACCCTGGGGTGCGACAAAGGGGTTAGGGGGCTCCCCC	0.317151	0.348574	0.377943	0.374541	0.237276	0.597116	0.564075	0.63781	0.866287	0.25919	0.392948	0.396139	0.384123	0.303099	0.250743	0.527868	0.520714	0.540595	0.541283	0.579396	0.53476	0.80276	0.691916	0.826355
cg13588403	DPF3	CGGAGCGTCCTTCCCCCTCGGAAGGACACAGCCAGACTCCTCTGCAGGCCGGGAGAAGGT[CG]CGTTGTCCATTGGCTCACACCTGGCTCGAGGCTCCGCGGGTCCCTTCCTCCATCTCCCCG	0.6443	0.601904	0.60018	0.653516	0.668092	0.780052	0.892862	0.956156	0.933644	0.61868	0.610726	0.644312	0.666529	0.579153	0.769313	0.911664	0.916199	0.918096	0.917095	0.85357	0.83093	0.897603	0.857279	0.83116
cg11195733	TECPR2	GCTGAGCACCAGGACCGTGTGGGCCCGCTGTCCAAACGGAGACCTCGCCCGGCGGTACGG[CG]TCACAGACAAGAACCCCGCCGGGGACTACTGGAAGAAAATTCCCGGCAGCGTGTCGTGTT	0.59386	0.670702	0.623963	0.589047	0.622442	0.857379	0.829404	0.820119	0.857318	0.553249	0.664878	0.640839	0.609545	0.666165	0.848693	0.840854	0.827541	0.799116	0.834132	0.842435	0.817727	0.857101	0.809554	0.851753
cg04285652		TGCAGCGGGGATACTAAGGCCGGGACAACAAAAGTACGTCGCTGACTCGAAGCTGGGCGG[CG]GGTTTCAGAGGCTGAGTTCTTAACACCAGGGCACTTCCTTGTAGCCACCACGCCCGGCTG	0.364818	0.469499	0.39886	0.379739	0.357596	0.831649	0.523902	0.808538	0.664758	0.338932	0.464639	0.418284	0.361637	0.373462	0.605815	0.131892	0.131095	0.119476	0.120231	0.138394	0.130425	0.122137	0.143206	0.119898
cg18166150	PFKP	ACTGTAGCCTGGGGCTCTCGCTCCCATGGGACTCCTCGGGGAATTTCTCAGCAGCAGGAT[CG]CCTCTGCGTCCTTGCAGGGGGTGGCGTCTGCTGGGGGCACATCCCATCGTGCAGGGGGAA	0.438646	0.503097	0.312221	0.392373	0.393079	0.62276	0.583444	0.610683	0.711549	0.800348	0.483085	0.361683	0.391589	0.434611	0.575437	0.844602	0.83708	0.825839	0.838861	0.850708	0.833748	0.830605	0.791522	0.831604
cg14603031	LFNG	GTCCCTTGGTCAGAGCATTGCCCGTACACCCTGGGTTTTGCACTCAGCCATGCCAGGGTG[CG]CCGGGCGGCACGCGCTGGGCGGGCCGGGCAGAGGAAGGAACATTCCTCCCCGTGTGCCGG	0.537847	0.624052	0.515382	0.500215	0.575381	0.836458	0.864419	0.815987	0.854688	0.843382	0.563019	0.586608	0.510636	0.591883	0.871577	0.267516	0.264198	0.265107	0.293221	0.330176	0.308369	0.247274	0.25419	0.188838
cg23602478	CNKSR1	TATGCAGTAGGCTCCGCCCAGGACCCAGCCCGGCCCCTCCTTAGGCCTGGGCTCTGGGAG[CG]GAAATTCCGGCGACAGCAGGGCAAAACAGGAGCTGATTCGAGCTGGCAGAGCTGGGCCAT	0.474686	0.549564	0.600967	0.618828	0.596761	0.819658	0.749568	0.685709	0.835047	0.461863	0.583084	0.621105	0.59584	0.543195	0.683695	0.0821793	0.0970484	0.0970875	0.112372	0.0973607	0.113757	0.132468	0.234465	0.15102
cg11485823	DPCR1	CTACATGGTTGCTTCCTCTTCCTCCCAAATCCCTTAGTTTTCCTAAATGTCTACAGTGGA[CG]CCCTGTTGGTTTGGCTTGCTGGGTTGTGGGTGGACACGCAAGGAGGGGATTTTTATTTGG	0.326146	0.409236	0.270124	0.175213	0.278736	0.52414	0.546605	0.821426	0.628252	0.519056	0.357422	0.300815	0.207436	0.283675	0.530307	0.792238	0.790072	0.794204	0.772961	0.791779	0.777326	0.790009	0.758323	0.782319
cg00019678	C12orf34	TAAGAGCAGAGAAAGTGTGTGTTCGGGTCATTAGGAGAAGCCAGGCCCCAGTCTATGCAG[CG]AGCATTTTCCCTGCTCTTCTACCAAGCTCTCTAGCTAGATTAACAGGTCAATAAATATCG	0.594689	0.586031	0.644067	0.605543	0.594125	0.838432	0.805774	0.841536	0.843521	0.879559	0.628573	0.68893	0.608933	0.650555	0.864521	0.810046	0.810498	0.809434	0.815424	0.801264	0.813989	0.812331	0.754489	0.783097
cg16988986	SORT1	CCCGCTCACTGGAGCGCCCATTGTCTGCTAAGCAGCTGCCTTGCTGCAAGAAGGTGAATG[CG]AACTGATGTGGGCCACATCCTACGGAGACAGACATCAGGACATCCGTGACTCCTGCAAGC	0.46202	0.479767	0.451182	0.453158	0.378628	0.880692	0.868343	0.824281	0.911712	0.76308	0.444733	0.463813	0.4391	0.404976	0.624298	0.284795	0.287957	0.193522	0.194901	0.266774	0.228492	0.23056	0.214606	0.196752
cg09556952	SIM2	TGGCTGCGCCCGGGGCTTGGGGGTGGGGTGGCTGCGGCCGCGCCCCTTGCTGCCCTCTAA[CG]TGTCGCCTGTCCCCGCAGCGCCCGCCGCCGCCGTGCGCAGGTTCGGCGAGGACACCGCGC	0.40161	0.490554	0.387621	0.46598	0.34415	0.62274	0.590015	0.755276	0.576457	0.0845613	0.465589	0.375761	0.462687	0.326271	0.108002	0.0854964	0.0890399	0.0966638	0.0791383	0.0879877	0.0859852	0.0790088	0.0873037	0.0859528
cg13995399	CREB5	GATGCAAACTTGAGCTAAACGGGAAATTAAAGAGGGACCAGGGCTGGGCCATGACAGCAG[CG]GCCACACTCGGATGGGAGGAGGCGAATAGTTGGTTCCTTACCAAGAACCCGGCAGCAGGC	0.329551	0.493904	0.355364	0.265976	0.43494	0.689671	0.748567	0.599146	0.697327	0.659219	0.466414	0.365248	0.278342	0.43968	0.693938	0.863543	0.905669	0.858062	0.876403	0.857677	0.854699	0.877605	0.864497	0.881186
cg00747944		CAGCGCGGTGCTGGGCACTCGAGCTCTCCGCAGCCGTGGCACGCTGGCCGGCCGGCCCCG[CG]TAGGCTGCAACTCCTTGTCGACCTGTTTTGCACTGGCCCTGCCCGCTAGATAGGGTCCCC	0.484296	0.679586	0.630284	0.575512	0.622664	0.794557	0.875853	0.748629	0.855248	0.907435	0.706809	0.615378	0.589486	0.666806	0.882462	0.146963	0.14169	0.157179	0.181964	0.183158	0.161921	0.155591	0.205534	0.140857
cg00094244		ACAAAAATGCATGACTATGAATCTACCCAAGTCAGAAATTCAAGGCCCTGTCTAAAGACA[CG]TAAGTGTTTATAAAAATACTGGTGAGCTATGTAACATCTACAGAACAAAGCCCATTTTAT	0.405091	0.497175	0.490748	0.403724	0.541101	0.667829	0.621052	0.80537	0.802803	0.551287	0.547182	0.47017	0.414254	0.430599	0.661179	0.839872	0.827145	0.829442	0.815453	0.833773	0.836676	0.840153	0.792184	0.837253
cg02953529		TTAGATTCCAGATCCCAGTTCCTCCATGCACCTCATCTGTACTGTAATGAGGATCCTAGC[CG]CCAGGATTTAGTGAGCACTTACTGTATACCAAGGTTCTTCACCACCCTCGGTGGGCACCA	0.616041	0.605486	0.593935	0.590089	0.517118	0.835281	0.825405	0.795289	0.798667	0.677553	0.625758	0.599942	0.599129	0.613675	0.468	0.826191	0.827415	0.838553	0.828158	0.842396	0.836435	0.822047	0.80122	0.806859
cg11779440		TAAAACTGTGCAGAGTACTTTCTTTTTGAACTTGGCCTAATGATTATAGTTTTAAGGGCC[CG]TTTGTACCAAAAGTTGCTTGAAATTTTAAGCAGAGAAACCTTGCTGAAGCAAAGCAGCTG	0.375172	0.41983	0.469699	0.406961	0.390392	0.6231	0.613691	0.56943	0.800686	0.214096	0.440815	0.507077	0.40121	0.402015	0.466666	0.147842	0.144735	0.154041	0.163777	0.190602	0.170774	0.207561	0.187932	0.208794
cg22325764		CTACTCCTTAAACACAGGGATTCTGTGTCCTGACATGAGAGATTCTCACGTGCTATATCC[CG]GATGCAGCCAGAGATGTGCATTTCAACAGGGAATTCAGAGGTGAGTGCTCGCATTGCCAC	0.61181	0.604623	0.571244	0.620085	0.593101	0.890162	0.739656	0.808727	0.862407	0.436759	0.617258	0.577177	0.612015	0.56621	0.823002	0.784281	0.746449	0.77043	0.786583	0.776469	0.736217	0.787578	0.733486	0.753083
cg09413013	TMC8	CGGAGCCAGGCCCGAGCGACTCTCCGGGCCCCAAGTACCCTGCCTCCCAAGCTTCGCGCC[CG]CAGTCCTTCTGCCCCGGATGCCCATGCCCTGGCTCCCCGGGCCACCAGGCCCCGCGGCCG	0.605338	0.655342	0.65665	0.605954	0.609347	0.839658	0.787012	0.850804	0.833187	0.86334	0.649985	0.703784	0.593267	0.617219	0.860042	0.758266	0.721667	0.685057	0.691861	0.803582	0.742598	0.786107	0.7816	0.806374
cg21484527		CCAGCACGTGCACGACACCCACAGCGATGGGCTCGTGGAAAACAAGCTCAGCCCGGCTCA[CG]GTGCCCGGAGATCCACCTGGCACCCATCAGTGACCACAGTTCAGGGCGTCGGGTCTTGGC	0.510008	0.548825	0.493209	0.408108	0.511804	0.729309	0.736836	0.783271	0.789727	0.503646	0.544967	0.498619	0.397875	0.495837	0.482592	0.823772	0.809101	0.842427	0.837627	0.817623	0.819153	0.817503	0.773346	0.821687
cg20235099	CARKD	CTGATGCTGGTAGTGGAATCTCAGGCACTGAGTGTGGCGAGTCTCAACTGGCCACTCCCA[CG]GAGCCTGGGGAGGCTTCAGCAAGAGCCAAGTGAGAGCAGGGCAGAGGCCGGGCCCAGCGC	0.561641	0.582542	0.558999	0.478469	0.549197	0.638799	0.830805	0.800675	0.825436	0.596669	0.55449	0.575545	0.500321	0.561148	0.864479	0.831422	0.841136	0.817497	0.814053	0.806116	0.793126	0.825124	0.765594	0.817061
cg17722747		CCGGCCCTGTGCATCACTTACTAAAGCTGCATTTACAGTCCCGAGAGCGAAGGGACAGAT[CG]CAAATCAGATCATTTATTGCTGCTGCTAGCTCAGCGAGGAGAACATTCCCAAGGTGAGAG	0.570835	0.554123	0.565706	0.506679	0.434006	0.813605	0.736711	0.819672	0.830182	0.630063	0.527854	0.577114	0.5367	0.438427	0.856538	0.862347	0.889052	0.883573	0.878693	0.86878	0.856551	0.872039	0.832854	0.890444
cg26893231	NOX4	GGCATGCTGTGAGAAGTTCAAGCCATGTGGAGAGACGATGTAAAGGAGTAACAACACATT[CG]GCTTAGCAGCCTCATCTGAGATCCCAGACCATAACTAGCACCAGCTGCAGCCAGCCATTT	0.301133	0.480156	0.289558	0.230233	0.350456	0.752686	0.57066	0.815702	0.575393	0.20769	0.465703	0.28153	0.220192	0.419933	0.270023	0.854869	0.876795	0.894346	0.858707	0.85295	0.847494	0.862137	0.832298	0.85623
cg10124548	RASA3	AGCGACGGCGGGTATCCCAGAATAGAAGAGCTGGGGAACTCGCCGACACGCAGGCGGGAG[CG]GCCCAGTCACCAAGCCCCGTCTCCCGGGCAGCACGTGGGAAACCCCGCCTTTCTGCCGGG	0.268548	0.471225	0.321201	0.217094	0.355357	0.514614	0.878298	0.710983	0.860915	0.90109	0.489834	0.338382	0.226997	0.428872	0.890084	0.898922	0.907438	0.917977	0.888559	0.895662	0.872835	0.870945	0.837025	0.902405
cg27064708	RAD51L1	ACCTCCTCTTGAAGTTGGTTTCCGATCCCTGGCAAGCCTGTGCTCTGCAGCCTTGAGTAA[CG]GCCACAGGCCGATTCTCGGCAATTAAAAATAATATTGGCCCTGATAGAGAACTCTTGGGT	0.353479	0.511771	0.394101	0.401914	0.46098	0.729127	0.522551	0.739822	0.710138	0.404819	0.53758	0.415642	0.432918	0.491035	0.534419	0.802976	0.819406	0.822822	0.828114	0.828812	0.813516	0.823208	0.757284	0.789224
cg18856614		GAGCCTTTCTCCCTCCAGGGCTGGTTCCTCAGAGCTCACCCATCCCCTTCTGCATCCCCC[CG]GGCCCAGGACCTGCAGGCCAGGCTCACCCTCTGCCCCGAGTCAGCCCGCGCTGCCCCCCG	0.376702	0.346799	0.372016	0.442843	0.286384	0.696164	0.468207	0.715014	0.731774	0.690155	0.362245	0.388863	0.445844	0.312549	0.506904	0.720443	0.721746	0.717858	0.71253	0.74995	0.702563	0.743207	0.670152	0.751077
cg16397028	ZFHX3	AGGGCATTAACACCAGAGCAAAGAGGCCGGGCTCGCCAGGCCCACAGCTTTGGGAGGAAA[CG]TGGAGGATGCCTCCCCCTAAGATGTGCTTTGGGCTCAAAGGATTGACTGGAGTTTGCCCC	0.355873	0.517776	0.413399	0.425261	0.476814	0.667369	0.770556	0.691482	0.65702	0.773549	0.506776	0.457867	0.443137	0.478482	0.771898	0.802343	0.795484	0.822783	0.792471	0.815413	0.775423	0.808216	0.763766	0.806119
cg17286983		TCACAGGCATGGAAATCCAGATTGTGCAAAGAGGTCAAGAACCTGAATAATTATTCCACT[CG]TAACCAAACAGTAATAGACACTCCCTTTGAAATTGTGGAAATTCTCATTTCCACACTAAA	0.354371	0.535256	0.484164	0.431432	0.438147	0.63932	0.640037	0.740457	0.736965	0.386716	0.536665	0.507653	0.439859	0.489064	0.638385	0.834822	0.832696	0.84349	0.856309	0.806483	0.814465	0.810683	0.81722	0.843352
cg09186101	SLC16A3	GGGGAAGGTGGCGGGGTGGGAACCGTGTCATTCCAGAGTGGATCTGCGGTGAAGCCAAGC[CG]CAAGGTTACAAGGCATCCTCACCAGGGGCCCCGCCTGCTGCTCCCAGGTGGCCTGCGGCC	0.516219	0.565748	0.483201	0.412503	0.544897	0.810908	0.798222	0.857935	0.748467	0.694384	0.53212	0.507254	0.416118	0.512169	0.854888	0.853896	0.861455	0.867589	0.858028	0.843142	0.856866	0.861607	0.819928	0.860209
cg00841988		GCTGGGTGGGTGACAGCCGCTGAGGCTCTGAGTGACCCTGCAGGCTGGTGGCCAGCCGGC[CG]CCCATCTTCCACACCATGTCGGACGGCGAGGGCCCCTCCGCCGGTGAGTGGCAGCGCTAT	0.627238	0.572516	0.506508	0.494916	0.549524	0.863727	0.699529	0.90775	0.876358	0.916135	0.523938	0.516077	0.472232	0.541784	0.919498	0.902169	0.884993	0.90922	0.881031	0.899555	0.891575	0.890614	0.832581	0.887435
cg22463795		CTCTTTGTGTGCACGCCCCCCTCGCCCCGGGCCTCAGGGCAGGAAGCACCTGGTCTGGAG[CG]GATGCACAGGGCGCCTGGTTCCGGTCCAGCTTCCGCCACTGTGGCCCCTGGAGAGCTGGG	0.622437	0.661046	0.647613	0.627438	0.67153	0.877167	0.897333	0.931904	0.914985	0.816105	0.662619	0.664952	0.646996	0.613474	0.626253	0.749963	0.739594	0.774041	0.780405	0.788534	0.741525	0.800453	0.775236	0.820576
cg16313758	IQCE	ATCTGGAGCTGCCTCTGAACTAAGCGTCGCCTTATGCCAGGAAGGCCCACAACAGGGCCC[CG]CCTTGGCCCAGCTTGTCCTTTGTGCCTGGAATTGCCGAGGTCCTTGCTGTCTTTATTTTT	0.354287	0.45473	0.504648	0.358999	0.441894	0.625572	0.788207	0.628495	0.630853	0.571283	0.476011	0.516849	0.383988	0.434002	0.539991	0.79544	0.768141	0.802588	0.766643	0.766912	0.779941	0.787155	0.767961	0.790467
cg11561301	C4orf6	GGACAGGTGAGCCTCAAAATTGGGGATCAACCTGAGAGGGTTGTTGGCTTCACCCAGGAA[CG]AACTCAAGGGTGAGCCAGTGGTGACAGAAAGCAGTGTTTATGGAGCCAGTGCTGCTCCTT	0.443826	0.429616	0.330972	0.319718	0.381864	0.568103	0.647819	0.692851	0.646107	0.714622	0.410038	0.36488	0.328529	0.399251	0.757161	0.697609	0.71031	0.705532	0.678607	0.713742	0.702263	0.70147	0.687624	0.684586
cg05169951	KREMEN2	ACAGCCCCGAGGGGTGGCCTTGCCCTGCTCCCCCGGGGACCCCCAGGCTGAGGGTTCTGC[CG]CGGGCTACCGGCCTCTGAGTGCCTCCAGCCAGAGCTCCCTGCGCTCGCTCATCTCCGCTC	0.446692	0.554801	0.59415	0.577715	0.46048	0.899743	0.79916	0.659055	0.933484	0.895701	0.549394	0.615225	0.575683	0.484772	0.803597	0.920722	0.901121	0.923207	0.915587	0.937357	0.922528	0.944546	0.884099	0.950139
cg01808968	SLC1A7	ATGCAAACCTTACCTTACTTAAGCCTCTGCTGATCTGGCAGCCAAAAGCAAGTCCTGACT[CG]TGTGTGCTCATACTAATAACCAATGAATTTATCCTGCAGATTTTAATCAAGAATTATACC	0.540242	0.49817	0.570181	0.490897	0.482992	0.668492	0.770473	0.749913	0.780644	0.570122	0.523173	0.571954	0.515341	0.505208	0.6613	0.810459	0.795808	0.854712	0.808413	0.819277	0.790072	0.811662	0.731859	0.788865
cg15162392	QPCT	CCCAGGGCCGCCCAGCCCCGGGGTTTGCGAAGGTCCGGGGTAGGAGGGCTGCAGCCTGCG[CG]ACGCGGCGGGAGGCTACCCGGGGGCGATGGGAAGGCGGGCGCAGTCGACCCAAGGGTGGA	0.131347	0.144705	0.131681	0.0690212	0.117829	0.505229	0.576031	0.692847	0.272217	0.120759	0.134777	0.119856	0.0988952	0.118911	0.320337	0.0753985	0.0550422	0.0609133	0.0414474	0.039906	0.0553611	0.967588	0.640915	0.965825
cg02757970		CGAGCCTTGGGGCGCGGCACCCAGGGCCTCCCCACCGGGCTCCGAGGGACGCAGCGGCCT[CG]CCACCGCATTAGGCCGAATCCGGTGCCTTCTAGAAATGGCCTCCTGCAGCTCCAGAGCGC	0.413867	0.427233	0.483266	0.312109	0.241011	0.605514	0.781836	0.749856	0.647528	0.226385	0.432961	0.508988	0.308488	0.339668	0.480656	0.575741	0.426192	0.567356	0.462362	0.633717	0.597634	0.878966	0.951328	0.965562
cg09287096		GGTGCAGCTGCCTCATCCTTCACCGGCTTCCTCTGTGCAGGAGGCTGCGCGCACCCCGGG[CG]AGGAGCATCTCTCACCCGGACAGCGGGGATCCAACCGCACTCAGGGCTCGCTTTGTTAAT	0.784905	0.696866	0.718012	0.707526	0.72549	0.882554	0.943687	0.936496	0.95425	0.558459	0.703785	0.740424	0.717796	0.685573	0.74732	0.924773	0.941006	0.952331	0.94902	0.933875	0.927804	0.922905	0.912629	0.936479
cg14983135	UPP1	CAACCTGTTCTTGGACCTGGCAGGGCCCAGAGAAGCGAGGAACTCCGCAGCTCGTCGACA[CG]TCTCGTCTCCTGTCCCAATTCAGGGCTTGGTGAGGTGACTCGCGGTCGCGGGTGACTCGC	0.499108	0.590704	0.599157	0.568754	0.381017	0.776994	0.82342	0.823013	0.873656	0.850576	0.60228	0.583435	0.572849	0.386813	0.8145	0.04699	0.0428436	0.0367243	0.0446998	0.0413176	0.0467287	0.0381207	0.029387	0.0354957
cg04027548	KCNJ8	CGTCCTTGCTCACGGATGTTCTTATGCGCCAGGTTGCAGGCCCCGCTCTTGGCGATGAAG[CG]GGCTTTGGGGAGGCGGTCTCGGATGCGCGGCTTGCGCAGGTTCTCTGCGGCGATGCGCGC	0.622373	0.741247	0.723933	0.706179	0.673865	0.933719	0.958166	0.977635	0.981282	0.611615	0.740156	0.751745	0.724671	0.681523	0.780125	0.239911	0.0886246	0.110258	0.101559	0.0752433	0.0898379	0.0833477	0.262686	0.277096
cg23989336	C17orf55	GCCAGGCTCCGGTCGTGATGCGGGGTGGCAGAGGGATGTGGGCAACGCAGCTGGGAGTCC[CG]GGGCACAGCCGGGCTCTCTCCAGGCTCCCCATCCAGCAGCTGCGCACCCCCCCAAACACA	0.688166	0.626027	0.703405	0.704629	0.687934	0.891087	0.87078	0.913419	0.909574	0.71968	0.627463	0.736353	0.723162	0.607867	0.894633	0.837277	0.833614	0.886943	0.839378	0.881823	0.870879	0.878756	0.863142	0.908736
cg24377826	FAM53B	GCATAGAGTAGGCTCTCAAAAACAGCAGTCATCATAAGGATAATTAACGGTACTGGAAAA[CG]CTCTCCTAGCTGAGGCTTGACTCAGCCAGAGCTGCAACAGGGTGCCAGCCTCTGTGGAAT	0.511094	0.618803	0.568415	0.547396	0.607581	0.843789	0.816797	0.808507	0.854676	0.853984	0.652694	0.550886	0.558256	0.640717	0.846886	0.831926	0.811632	0.838803	0.831899	0.815095	0.817906	0.825673	0.805181	0.846792
cg08113628	RGS16	GCTAAGTGTTTTGAGCCTCTAAAAACGGATGGGTTTATAAAGGTGGGTATGGACAGAAGC[CG]AAAAACCTGCCAACACATCCTGCCCCATCATGAGTCTTAGGGTTAAGCACCCAGGAGTGG	0.492651	0.518321	0.51793	0.507196	0.565615	0.627317	0.8769	0.811644	0.914534	0.885461	0.601715	0.568563	0.504402	0.599281	0.883735	0.777478	0.773667	0.729431	0.789511	0.749863	0.781315	0.795874	0.704865	0.76718
cg01853561	SIM2	CCGCGCCAGGAGCCTGGACCCGGCCTCCCGGGGCTGCGGCGCCACCGAGCCCGGCAAATG[CG]CACGACCTACATTAATTTATGCAGAGACAGCTGTTTGAATTGGACCCCGCCGCCGACTTG	0.49972	0.546498	0.488477	0.624824	0.40703	0.874846	0.850237	0.757631	0.866099	0.597153	0.5191	0.497491	0.620993	0.428437	0.325732	0.0800472	0.0747281	0.0740227	0.0787758	0.0824639	0.0903536	0.0749494	0.0887253	0.0734095
cg25001102		GCGCGCCCCTGCTCCGGCGCCGGGAGTAGCTGGCTGTAGGGATCAGCCGAGCGAGGTGGC[CG]AGTCCATAAACACGGGCCATTTAGCAATTACCCCCAGGGCGTGATAATTGCGCTGGGCAG	0.637007	0.747166	0.729339	0.568995	0.683616	0.963382	0.949215	0.964385	0.881928	0.945633	0.775418	0.758363	0.595715	0.6829	0.887957	0.233649	0.258755	0.247767	0.297713	0.22777	0.252755	0.277546	0.275942	0.289268
cg19482843	EIF2C2	ACCGCGCTCACGCTGCCTCGCGGCTGTGGCGGCCCCAGGGCAGTGATGCGATGCTGTCCC[CG]TAAAGCTGCTGAGCAGCGCCTGGAGCTCTTGTGAAGCTCTCCCCACGTGCAGGCCAGGCA	0.566349	0.687891	0.638846	0.575822	0.635476	0.894489	0.782876	0.871719	0.762255	0.87946	0.696729	0.601417	0.597996	0.64507	0.894505	0.908098	0.90327	0.920271	0.881999	0.910807	0.898367	0.898865	0.893318	0.891242
cg13092108	RPS6KA1	CTTCTCTCTCAGAAGCAGCTCCTGACCTCCCTTGAGGGCTCTGTGGCTCCAGTCCCTAAG[CG]TGCAGAAGGCCACCTCTTCCTGTGCCTTTTGACCCCAGGGTCAAGGTCAAGCCCCTGAAT	0.663534	0.607149	0.647016	0.543469	0.532191	0.823664	0.774035	0.848036	0.820275	0.832488	0.60121	0.696758	0.565504	0.553619	0.856231	0.326131	0.32756	0.289729	0.328089	0.314592	0.300019	0.27266	0.285696	0.246428
cg10213875	UPP1	TTATATGGCAACCTGTTCTTGGACCTGGCAGGGCCCAGAGAAGCGAGGAACTCCGCAGCT[CG]TCGACACGTCTCGTCTCCTGTCCCAATTCAGGGCTTGGTGAGGTGACTCGCGGTCGCGGG	0.578333	0.682377	0.657624	0.682763	0.435497	0.951763	0.887532	0.94507	0.95248	0.960155	0.672367	0.679929	0.714145	0.437503	0.950361	0.0396553	0.0315783	0.0392352	0.0389734	0.0258104	0.0390609	0.0327462	0.0531279	0.0378033
cg16636355		TACATCTTTTTGTTAAAAATGCCTTTATGAAGGCTATAATCCTTATCAAATTAAACCCTG[CG]GATCCCCCTTTTAATACACAGGGAGTCCTCCTCATTTATGGGCGTCGGCGCTAAGCAGCT	0.362534	0.438887	0.367851	0.393806	0.373968	0.578072	0.828802	0.583215	0.691342	0.593901	0.388119	0.386024	0.395485	0.373354	0.630612	0.245917	0.216902	0.258265	0.219875	0.226348	0.222306	0.193971	0.195979	0.222369
cg25264268	SHC2	CACAGATGTTAGCAAGGCTGTTAGGAAACAGGCAGCCGCAGGCGGGGCTGGTGGGCGAGC[CG]ACTGCACAGCCGCCTCCAGGGTGGACTGGCACCGCCGGTAACGTGATTAAGGCCGGCGCT	0.489653	0.574203	0.628602	0.606619	0.461298	0.791978	0.862597	0.944626	0.95834	0.943214	0.563246	0.6269	0.611372	0.464274	0.94072	0.896653	0.872761	0.928993	0.931562	0.938697	0.904041	0.947169	0.93713	0.954597
cg21126020	TRIM10	CACCCACACATGCACATGGCTGGACACAGGCACATACTAAATATGCACCAGCACCCATAT[CG]TCACACACTTGCATCTCTGGCAGCCAGGGTTCTATTCTCCTGCCAACAGCAGAGATGGGA	0.45796	0.53711	0.43107	0.38752	0.4482	0.775162	0.725581	0.754916	0.817871	0.826289	0.531832	0.445848	0.389064	0.490502	0.829191	0.794799	0.754872	0.797721	0.769181	0.805148	0.76313	0.780568	0.73533	0.801252
cg14185860		CTGTGGGTCAGAGGAAATGTGGAAGGGAGTGTTATTTAGAGTCTGGTGTCAGTTTCCACG[CG]ATTACTTCAGCTATGTCACTTGGGTCGCCATAAAACCATCCACTGATTTACTCTGGGCTC	0.548073	0.482034	0.52042	0.646738	0.514927	0.7434	0.840177	0.754177	0.812021	0.876657	0.490179	0.549755	0.67412	0.476224	0.876784	0.909778	0.90666	0.906728	0.905581	0.917021	0.904421	0.91846	0.865212	0.899602
cg18638180	C21orf70	CCCTGGGCCTTGGAGGTTTCACACCGGCTCCTGAAGTGAAGTCTGAAATGCAGAGCGCAG[CG]ACTGCCTTTCTCCAGGCAGGGCTTGCTTCTGCTTTGTTTTTCATTAGACATGGTGGATTT	0.337368	0.464809	0.341776	0.284026	0.423619	0.561536	0.505567	0.624247	0.654243	0.682895	0.404173	0.377698	0.300045	0.42638	0.579984	0.811983	0.834653	0.838607	0.832182	0.823603	0.825715	0.740579	0.792576	0.786661
cg25003307		ATCAAACAGCCAGACACCCAAGGCCAAACTCACTAATAAAGTGAGACATTCAGCTCAGCC[CG]GCGGCTGCTGCTGAAGGTCTTAAAAAAACCGCTTACTGGGGAGTTCTTGATAAACTGTCT	0.359389	0.312167	0.340831	0.333894	0.197042	0.546844	0.75566	0.531363	0.51906	0.445515	0.310908	0.356293	0.358631	0.210988	0.171634	0.818406	0.817487	0.83183	0.8161	0.82687	0.799668	0.797891	0.668705	0.801975
cg06797385	DOC2A	CAGGCCCAACTCAGGCCAGGGCAGGCTCCCTGGGGAGGAGAGGGTCAGAGCAAGGGCTCA[CG]TCTTGACGTAGGGGTCCGAGTAACCGTTGACGTCCATGGCAGCCAGATGGGCGCAGCGCA	0.591936	0.672203	0.708195	0.702189	0.652351	0.95059	0.813746	0.93492	0.905468	0.694126	0.676631	0.733	0.728513	0.633206	0.94306	0.928538	0.930326	0.960194	0.918588	0.923639	0.943826	0.933968	0.906782	0.93904
cg14212412		CCTTGTGTTTGAGGACTGTCAATTCTAGATCTGCAACAAGCATTATAAGAAACCAACAAA[CG]GTGCGTGTATTTATTCCACCTCTCTTCACACTGGGCACTGTGCTTCTTTGTGTGTGTATC	0.485819	0.520086	0.52741	0.621109	0.593437	0.794845	0.73308	0.864129	0.824279	0.882468	0.541666	0.543226	0.63782	0.509796	0.895142	0.86986	0.866606	0.862272	0.851021	0.837252	0.838838	0.855557	0.838735	0.859185
cg22590032	FLT4	GTAGGAAAACAGGAAGTGACTGGAGGAAGTAGGTGCCTTTGTTCAGTACCCCCTTCTCGG[CG]TTGCCCCCAGGCTGCGCCAGCGGCTCAGCAGCCCTCTGTGCAGACCTGGTCAGCCTCCAG	0.600949	0.534724	0.569506	0.575989	0.540779	0.804371	0.775042	0.722301	0.76554	0.381496	0.552591	0.601442	0.580066	0.523604	0.540254	0.79059	0.797877	0.771554	0.783943	0.802962	0.789485	0.806346	0.73149	0.772891
cg01662942	KIF1A	AGGCCCGGAGCGAAGCTGGCGCGGGCTGTGGGGGCGGAAGAGCAGGCGGCCCGGCTGCCT[CG]CCCTGGCCATGACTCAGGCTCTACCACCCCGTGGTCTCCTAGACAGCAGCTCCCCCAGGC	0.423814	0.579871	0.472067	0.419149	0.514328	0.838708	0.807561	0.866407	0.648314	0.87309	0.579604	0.482827	0.394698	0.550489	0.87576	0.874633	0.850196	0.874979	0.863723	0.856658	0.873021	0.863331	0.823128	0.860867
cg18575221	C14orf162	TTTGGATCATTTGGGCGTGGCTTGACACCTTGGAGGAGCTGTGTTTCTCTGGGAGGCCTC[CG]CGATTTGTGCAGCTTGCCATATTTTGAAAGATGGAGGTGAGCCAGGGTGATGTTCCCTCA	0.628544	0.647528	0.690833	0.719794	0.638433	0.884985	0.843837	0.86224	0.8826	0.770594	0.676334	0.707272	0.753811	0.656307	0.598849	0.857144	0.869255	0.864196	0.856936	0.861053	0.854858	0.879619	0.869182	0.877555
cg11888738	LOC100130872	ATTTGTTCAACGTAAGCAGCTGAAATTCTGCGTGGGGTGGTGATGAACGGCTCTAGCACT[CG]GTAAAAGGTATTTAAAGCGCATGTAGTTTACAACACTAACAGCCCGCCGCCCGCGAGCAC	0.362848	0.504951	0.389744	0.284349	0.421801	0.809131	0.651752	0.598468	0.694974	0.613298	0.482158	0.387499	0.283872	0.428873	0.599877	0.820148	0.812606	0.827518	0.841089	0.832138	0.843624	0.824748	0.807924	0.836186
cg27569887	RBMS3	TTTTCTTAGAAATATGTAGGTAAGGTTTATCTTGAATCTTAATTGCCTTAATTTTAAGGA[CG]TCAAAGGCTCTCGAGGCAAGCTGTCAACGTCTTGTTGAAAACAAAAATCAAGAAAGAATT	0.265025	0.46118	0.38121	0.333595	0.441442	0.707591	0.508951	0.680631	0.670756	0.586295	0.481063	0.402841	0.364657	0.553413	0.565984	0.823172	0.796629	0.750614	0.813505	0.785504	0.787949	0.830958	0.791835	0.796545
cg02930239	PRR23C	CCCGGAGATCGGAGTCGGTGCTGCTGCTGGGGGAACCTCGCACGCTGTGTGGCTCAGCCT[CG]CGCGATGGAAACTTGGGCCTTCCTGACGCAGACCCGGATGCGCACTGCAAAGCCAATTAT	0.588154	0.639409	0.668817	0.627018	0.739665	0.898346	0.77435	0.914473	0.941924	0.874645	0.624028	0.699448	0.630623	0.679552	0.930895	0.958839	0.971402	0.972104	0.96418	0.95711	0.955513	0.96163	0.946799	0.954738
cg02751532	CARD11	TGATAACACAGACCAATAAAACCAGGGAACGCACAGTGAAGGTTGACACGCCATCCTTAA[CG]CGCCTCCCCGGCTTGTTTCTGCAATAGAAACTCACATCCATTTAATCACCTTTCTGACAT	0.591472	0.559029	0.620825	0.598466	0.5112	0.801371	0.757517	0.823399	0.799575	0.662405	0.553332	0.648575	0.615352	0.519284	0.463028	0.82087	0.816453	0.821668	0.812652	0.845009	0.822336	0.835306	0.793014	0.835992
cg16426479		TTTGACTACTAATTTTTGTGCATTCATTACTATTGAGTTTCATAATACCTGGCTTGCCTC[CG]CCCACGGCCTCCGGAAAGCATAAATGTCCAGGCTAATGGGAGTGCTGAAGGCTCTGCCTC	0.660693	0.629969	0.64601	0.551015	0.653156	0.872223	0.732762	0.886022	0.847137	0.880291	0.619143	0.639471	0.586387	0.623097	0.686101	0.319803	0.318439	0.332994	0.294487	0.311299	0.303823	0.340937	0.386928	0.385727
cg14106308	VEPH1	GCATGGTTTGAGACTGGGCGGGAGATTCAGGCAGGCTCCGAGGGCACAGCGAGTGGAATC[CG]CTCAGCTCAGTGAACCTGAAGTTGTTCATTGCGGAGCCGGTGCCGGGTGGAAGAATTCAA	0.305599	0.330617	0.408475	0.310659	0.386269	0.706368	0.619049	0.51681	0.501782	0.500829	0.317723	0.401733	0.339037	0.346815	0.266694	0.0785691	0.0939771	0.0662462	0.0824459	0.0945095	0.0996035	0.0892883	0.111592	0.0887347
cg09367467	MAD1L1	CACGGGGGAAGGGGCGGGGGGACTCTGGGGTCCCCTCTATAAGGATGTTAATCCCATTCA[CG]AGGGCCCCACCCTACCACCTCAGCACCTCCCGAAGACCCCGCCTCCTCATGCCCCTCACA	0.534732	0.59896	0.5334	0.527761	0.549488	0.759422	0.763841	0.766951	0.768535	0.560633	0.598263	0.556049	0.516327	0.574482	0.749049	0.719392	0.701316	0.740725	0.726607	0.747626	0.716449	0.749685	0.704529	0.747173
cg02213822		GCCCGGGAACCCTAAGCAGAGCACCCAGGGGTTAGCGTGGAAACTCTGTCCTGTGGAAGG[CG]CCGCAGCGCAGGGCCTGGCAGCCTCGCGACACAGACCTGATGTGAACCTTGCCTCCACCA	0.512367	0.586114	0.603883	0.506475	0.526046	0.836998	0.654923	0.801034	0.834544	0.486843	0.599822	0.63048	0.508798	0.539204	0.454438	0.652537	0.592346	0.664815	0.676478	0.766796	0.70426	0.8019	0.779691	0.832627
cg12779575	ERN1	CGGCAGCTGTTTGGTCACTGGCACTGGCCTCCACTGAGAGGGACATGGGTAGGGAGGACA[CG]TCTTTTGCAAGGAAAGACAGTAAACTGAGATTTGGAGCCCAGGGAAAGGTATCTAACTTA	0.366224	0.488643	0.335197	0.325162	0.391683	0.874267	0.874904	0.634732	0.747849	0.54862	0.473787	0.412564	0.394991	0.42454	0.667166	0.753671	0.738089	0.748321	0.730513	0.753144	0.721867	0.730204	0.713844	0.749794
cg08042258	NR4A3	GCGAACCTGCGAGGGCTGCAAGGGCTTTTTCAAGGTGAGCGCACGCCGCCCCCTCCCCTC[CG]CACCCAGCCCCCTCACTGAAGGGAGCTTCTAAGTGAGTGTAGGAGCATCCTTGTTCTTCC	0.579777	0.693363	0.620053	0.620079	0.690213	0.866522	0.892358	0.899701	0.842457	0.623689	0.650055	0.632348	0.637544	0.66717	0.858941	0.115722	0.111388	0.133149	0.128528	0.158456	0.136464	0.161152	0.309585	0.128157
cg16457675	ABRA	GTGGGAAGGAGAGCTTAGTGACGATGGAAACTATGTGAAGCATTTCTTGCCAAGATGTGG[CG]CCTTTGCCCTGATGGTGTTCTTTTTATAAATCATGACAGCTCCAGTTTCATCACGGCAGA	0.4382	0.585139	0.420829	0.378733	0.492592	0.896465	0.756181	0.6702	0.744797	0.738521	0.553266	0.476073	0.378568	0.499181	0.891901	0.893186	0.893369	0.86063	0.892223	0.878631	0.872173	0.87692	0.872288	0.892234
cg14507146	C1QTNF3	AGCTCCAGGAGCGTGGTCTCCTCGGGCAGATGCCAGGACTGGAGCTGAGAGCTGCAGCGG[CG]GAGTGGTTTTATACTTTGGTGTGTAATAAATAAGGCTGTAGGCATGCCAGAGTGACAGCA	0.575941	0.636513	0.519975	0.548222	0.60363	0.80967	0.84402	0.852346	0.835817	0.650392	0.628844	0.564066	0.587905	0.604684	0.80979	0.868051	0.871985	0.875737	0.863836	0.871831	0.861081	0.881071	0.811787	0.866397
cg04886783	TMEM52	GCCCAGCACGGGAGTGGGAATGGGAGTGCATGTGCACAGCACAGCCTGAGGCCACAGCCC[CG]AGTTCCGGAAGGTGTGGGCACGGCCCCCACGCAGGAGCTGGGCGGGCCTCGCCACTCAGT	0.537863	0.4342	0.469782	0.423484	0.519092	0.787374	0.565019	0.73144	0.782382	0.464798	0.420346	0.493469	0.412341	0.466828	0.404519	0.772067	0.748649	0.755777	0.768102	0.792532	0.7659	0.775308	0.730636	0.764518
cg12217560	TNFRSF19	CTCCCTGCTCGTCTGCCTTTGATCTGCATGGTTAATTTTATTTTCCTGGATTTGAAGTTT[CG]TCTGGGCTTGTGCTGACATACATTTTTGGGAAGGTAGAAGCATTTGGCACAGAAGTGCTG	0.302739	0.384675	0.27348	0.267787	0.300518	0.568267	0.481548	0.608638	0.478267	0.204363	0.319803	0.328198	0.285543	0.316706	0.301137	0.641215	0.636555	0.671022	0.638293	0.61101	0.600811	0.602023	0.551461	0.634795
cg25342207	EBF3	TGGGGGATTCAGGCAGGGAGCGTTTACCTCCTCACTGTCAGGGGCTCGGGCTCTGCTCAG[CG]CCGATGACAGATCCGCCGACACCAGCAGACAGTAAGCAACGCGTGGAGAGGAGGCTGGCA	0.512936	0.559945	0.545881	0.56299	0.482253	0.821635	0.753939	0.643707	0.782098	0.573768	0.534101	0.574104	0.561148	0.506048	0.823321	0.794419	0.793913	0.770225	0.76783	0.796957	0.774262	0.795957	0.724638	0.7991
cg02623400	ELAVL4	TGGGCAGGGGGTGGCGGCGGCGACGGTGGCGGAGCCGCAGAGCGAGCTAGAGAGCGAGAG[CG]GTGAGACTCTGCGGACGTCTTCCCGCCCGCCGCGCTCCGCCCCACCCAGCCTCCGCAGCC	0.113969	0.154008	0.110741	0.127085	0.235288	0.373742	0.281854	0.516301	0.477126	0.263588	0.128569	0.116313	0.106813	0.168423	0.33919	0.0572388	0.0535978	0.0457875	0.0650166	0.053259	0.0477297	0.951539	0.640795	0.936509
cg09249800	ACOT7	TGGCGGCCCGGTAGCGCTTCTGAGAGCTGTCCACAACAGGGTCGGCGTCCACCAACACCT[CG]ATCTCCATGGACTTATTGCTCGTGAAGGTCATGCGTCCCGAGATGGTGATGACGCAGCCT	0.619726	0.678716	0.586022	0.508423	0.612755	0.73208	0.826617	0.882521	0.95544	0.765784	0.666123	0.574465	0.514323	0.626115	0.911022	0.944088	0.942691	0.952868	0.936422	0.949588	0.92853	0.947272	0.908416	0.95202
cg00230120	LOC100292680	CTCTGCATTTGTGCAGTGCTCCCGTGCCGGGAACACAACCCAGGAACAAGGACTTCCGTG[CG]ACGGTGCCCCGGCCACCACCACGCCTCCCGCAGCAGCCAGGCCCGGGCCTTGAGGTCAGC	0.513633	0.595363	0.447244	0.361577	0.462969	0.956634	0.934045	0.939798	0.936984	0.952757	0.580367	0.492686	0.377887	0.514971	0.956454	0.94396	0.939271	0.942174	0.947541	0.936881	0.939057	0.938875	0.915416	0.92328
cg00664416	MANEAL	TTCCCTTTGTTCTACTACTTGCTGAGGCAGTCTAAAGCCTGGCTCCCTTCCGGCCTGGCG[CG]CTACGGTTCCCGCAGGCGCTCCGCTTCAGCACCGCGGGCGTGGACAGCTCCGGGGCGCGA	0.366466	0.340565	0.233462	0.327968	0.285558	0.539504	0.492718	0.743393	0.561992	0.89877	0.292826	0.323411	0.301479	0.335874	0.65599	0.0335995	0.0416378	0.0533101	0.0515526	0.0466795	0.0539139	0.0371824	0.0418812	0.0312877
cg10426234		AACCCACAGGATGTGCAGCACGGGGGCCCCGACACGAATGTGGACTTTAGTTACTGAACG[CG]TGTGATGGCCCGCCTGTGGTAAGAGGTGCGCCTCGCCAGCATAACGTGTTAATTACAGGG	0.604052	0.596967	0.602974	0.427289	0.583167	0.962566	0.898394	0.970338	0.968775	0.920537	0.646138	0.61607	0.41799	0.548037	0.755058	0.964902	0.976419	0.971162	0.977263	0.972775	0.967599	0.970587	0.951511	0.958714
cg03317245	P2RX5	GTGGGGGCGGGGAGACACAGGCAACCCACCCTAGGATCCTAAAAATATGCCTGGAGAGTG[CG]CATGTACCAACTGTTTGGAATGGTTCCCAACGCACAAGAAATAGAACTGATCCATGCAGC	0.59676	0.595144	0.615451	0.54304	0.649464	0.834064	0.787931	0.811147	0.832372	0.43562	0.565815	0.642437	0.52811	0.584282	0.218069	0.779907	0.772629	0.792534	0.781883	0.798688	0.784487	0.819401	0.801577	0.801719
cg07423765	UNC119B	GAAGATTCTGTGTGCTCTTTCAGACCAGGAGGAGGATGAGGAGGAGGAAAGTTTATATGA[CG]TAAATTCATTTGACCGTAAGATATGTATTTAAACATCGTGGAGGATCTTGGGGGTCTGAT	0.566894	0.656544	0.583829	0.577747	0.571035	0.85214	0.761685	0.732535	0.831684	0.572235	0.636544	0.607823	0.575783	0.608536	0.566833	0.794242	0.787609	0.767777	0.799707	0.795089	0.774646	0.818257	0.789926	0.785631
cg26681523	ZBTB40	ACTGGCATCTGCCGGCTTTGTGCAGGCAGCCCCGACGGTTTCCACAGCGAGCGCCAGCTC[CG]GCCAGCCTGGGACAGCTCATCCCAGCCGACTACACCTGCTTCTGGTCCTGTCCACATTTT	0.561845	0.655321	0.594653	0.513788	0.524371	0.892067	0.777502	0.85452	0.902272	0.883455	0.662195	0.591351	0.552437	0.576576	0.871009	0.891264	0.875478	0.875832	0.875319	0.879779	0.87112	0.886039	0.854922	0.882975
cg15637527	ARHGAP1	GCTCAGCTGCTCATTCCCAGCAATCAAGAGGGGAGGACTGGCCCCTGCTACCAGCCCAGC[CG]GCAGTCATTTGATTCATCCACACTTGCTAGGGAAACAGAGGCAGGAAAAAGCAGGAAAGG	0.588491	0.568697	0.509209	0.453232	0.495108	0.859797	0.828244	0.81488	0.843287	0.711763	0.590287	0.5059	0.478179	0.546198	0.549894	0.814068	0.780849	0.793842	0.807507	0.827382	0.803134	0.812631	0.801307	0.836498
cg16537371	NTM	TGAGGAACAATGATATCAGCATGTAATCTCAGCATTTTGCCCTTGAAATAAAATTCTGCC[CG]CCATTGATATCCAGTAGCTCACTCCTCACTAATTCAAAATAGGTCCCAGTGGATTGGCAT	0.677252	0.687156	0.628491	0.685691	0.678103	0.877336	0.875032	0.86187	0.893489	0.875524	0.698126	0.64688	0.698578	0.699677	0.890379	0.846975	0.864232	0.853126	0.837565	0.854964	0.825841	0.825712	0.811783	0.860865
cg06242243	NCOR2	CTGCCTCCAACATCTGGCAAACACATCCACAGCTGTGCAGCTGCCGGAAACGCCTCCTCC[CG]CTTCTCCTCCATGCACGCAGGCCCTCAAGGATGGCTTTCTGAGGAATTTATGGGGTCGCC	0.380638	0.510144	0.342255	0.38752	0.455203	0.656053	0.555803	0.640929	0.711757	0.575193	0.525487	0.372724	0.38554	0.558756	0.52601	0.813671	0.81543	0.862426	0.826432	0.824968	0.822778	0.832008	0.746318	0.832452
cg05540639		AGCGGGAGTCCTAATGGAAGCCTCTGGATCGAGTCCCGTCGTAACCAGGCTGCAGTGAGC[CG]GGCAGCTCTTCTAGCAGAGCAGGAGAGACGCCAGCTCCTGGGCCTCAGCCTGTGTCCGCC	0.321672	0.559715	0.482253	0.328632	0.410193	0.727976	0.874083	0.853913	0.860284	0.748847	0.605019	0.528286	0.399177	0.566553	0.689778	0.941032	0.949114	0.951661	0.938423	0.948347	0.935578	0.945512	0.932976	0.952587
cg13744172		ACTTTCCCGGTGAAATCTGCTTTTATTTGCTCCGAGCAAACCTCGGGCTCTCAGCGCTCC[CG]CCTGATGGATGCAAATGTAAATGTGCACTTATTTAATTGGATCAGGCCCCAAGATAAAAG	0.419545	0.628911	0.60404	0.569709	0.555482	0.854889	0.891716	0.710402	0.869592	0.886492	0.664986	0.575944	0.571038	0.638153	0.903636	0.0860617	0.0830217	0.0878419	0.0762628	0.0934268	0.0865213	0.0939462	0.160039	0.0920392
cg00618626		GCCCCACAGGAGGGAACGGGGGCTCAGGAGGCCTGGTGGGGCAGAGCTGGGACAGCTGGG[CG]AAGGGGCTGGGTCCTGGCTCCGCGACGAGGGCCCATTCCTGGGTGAGGGAGGGTGGGGCA	0.508575	0.609558	0.586686	0.452729	0.549213	0.872884	0.743052	0.811322	0.906209	0.898147	0.652453	0.600281	0.498549	0.631147	0.891911	0.870015	0.872141	0.860121	0.866052	0.862593	0.847126	0.889265	0.847887	0.890623
cg03664589	TMEM184A	GGCAGGTTGAGCCCCGGCCTGGACCGCCCCACGCTGCCTTCCGTCCACGCAGAGCGGGCT[CG]GCCCTCAGGGCTTTCCTTCGAGTCGTGTTGGAAAGAAGCAGAAGCAGCCTCACCCGTGGG	0.549396	0.618839	0.555246	0.558433	0.514935	0.800145	0.752532	0.75138	0.753947	0.551721	0.611933	0.579044	0.558841	0.576557	0.73242	0.789501	0.777141	0.764999	0.758781	0.817308	0.7679	0.793312	0.747053	0.791681
cg01169610	INPP4A	GCTTTCTTATTTTTAGATGATGGATTTGGACATGCTTCTATGAAGAAATGCCACATGGTC[CG]AGAGCAAACATGTCCAGTAAGTTGTTTGGTGAATTAACCCAAGGACAGGAGCCCAGGTCC	0.587479	0.59874	0.561712	0.498757	0.49262	0.636318	0.801164	0.840909	0.874315	0.634908	0.586587	0.56017	0.511464	0.534601	0.876364	0.796623	0.815526	0.835199	0.818891	0.834469	0.799201	0.833222	0.791873	0.819755
cg25075794	AQP1	AGCACAGCCGTGTCTGCATCCATCCAGAGGAGGTCTGTGTGGTGTGGGGCGGGCCAGGAG[CG]AAGAGAGGCCTTCCTCCCTTTGTGCTCCCCCCGCCCCCCGGCCCTATAAATAGGCCCAGC	0.423235	0.513286	0.388995	0.364651	0.474119	0.700087	0.676484	0.690222	0.757427	0.838577	0.507417	0.437923	0.418146	0.462809	0.822998	0.82979	0.835174	0.845528	0.812724	0.819487	0.817002	0.818677	0.734356	0.812864
cg12190044	NR4A3	CCTCCAGCCCGGAGGACGAGGTGCTGCCCAGCACCTCCATGTACTTCAAGCAGTCCCCAC[CG]TCCACCCCCACCACGCCGGCCTTCCCCCCGCAGGCGGGGGCGTTATGGGACGAGGCACTG	0.571961	0.602192	0.549077	0.512392	0.589802	0.787771	0.792643	0.837952	0.789728	0.529324	0.564468	0.56569	0.520781	0.58371	0.777475	0.126376	0.125273	0.150192	0.161621	0.159851	0.148401	0.126223	0.291184	0.136795
cg20462561		AGGAGCCAGCGCGTGTGTTGAAGTTTCTTGGCCCGCTCACCCGGCCGGCGGGGAATCCTG[CG]TGGCTATGAGGTTTTCCGAGGCCCGGTCGCCCGCCTGGTCTGCGTTTATTTTGGGTTAAA	0.440524	0.550243	0.606461	0.432428	0.515403	0.86579	0.711004	0.870346	0.854529	NA	0.566044	0.576305	0.426487	0.472584	0.902237	0.880464	0.889308	0.903119	0.900961	0.928599	0.890857	0.905814	0.874105	0.892355
cg21849844		AAGGGGGTTGTTTCCAGGCTCATAAGACAAACGAGTTGCCTTTTCAATGAAATCCCCCCG[CG]ATCCTTGAAAACGGAGTTTAAATGTCACCTCCGCCTTTCTAATGGGCACAGGGCTGGAGG	0.269081	0.319709	0.334215	0.369623	0.422104	0.571454	0.563356	0.844816	0.759854	0.66667	0.334713	0.368921	0.368308	0.336311	0.928251	0.0226752	0.0275479	0.0349308	0.0279074	0.0309886	0.0310543	0.0256727	0.0649675	0.0251617
cg23924306	C1orf177	GGCGCCCTTCGGGGTGCAGAGCCACAGGTGGGGCCCGTTTGCGTCCTGGGCTCACGCCCA[CG]GTCCAAAGCAGCTGCTGCCCACCCCGAAGCCACGCTTGGCCTCGGGAGAGAGGGTGTCCA	0.568263	0.673167	0.698452	0.595476	0.658431	0.800299	0.856829	0.805274	0.965976	0.946111	0.64317	0.703039	0.593931	0.619146	0.937546	0.935724	0.930049	0.943101	0.921227	0.939316	0.93665	0.926354	0.909279	0.937209
cg19516825		CCACCTATGGCTATTGGCTGCCTTGCAGAGGTAACTGCCAGAACGCCCCTGCAGTTCTGG[CG]GGAAAAACCAACAACTGACAAACATGTCCAAATATGATGTAACATCACTAGGGGCTGGCT	0.555952	0.614991	0.56836	0.538906	0.657322	0.870385	0.739779	0.824895	0.879518	0.760434	0.602898	0.558321	0.555149	0.620613	0.610018	0.846393	0.839785	0.850258	0.868968	0.862768	0.814871	0.839684	0.827826	0.853708
cg20154206	SFT2D3	GACCTGTGAGAGGAACCACAAGCAAACACCCTCTAGGAGGCTCTGAGAAACAGCAGGGCA[CG]TGGGTGCGGCCTGGGAACAGATCAGGATTGACCTGCGTGCGAGCCAGCTTGTCACAGTGA	0.450606	0.38659	0.390456	0.342065	0.392783	0.774698	0.573056	0.735752	0.603095	0.448984	0.385334	0.405892	0.342962	0.415704	0.6257	0.188602	0.167222	0.119171	0.137026	0.140766	0.143388	0.202188	0.175951	0.175493
cg20590643		TTTATCTGACTTAATGAATAAAAGAGGCATAGGAAAAATCTCTGGGGCCCTGGGACCTAA[CG]TTGGCTTAGCCACTTGCTAGCTGTGTGACATTATGTGGGATGAATTTGGCTTCAAGTAAC	0.342461	0.420342	0.308923	0.493553	0.365526	0.808401	0.762238	0.577368	0.801868	0.763501	0.454013	0.379375	0.524098	0.396603	0.637285	0.792931	0.768756	0.810128	0.779609	0.791734	0.789137	0.793652	0.735101	0.802796
cg00839129		ATCTGTGTTCAGCAGCCATCTGGCCCGAAATGGGGGAATCAGCTGCTCTCACAACAGGCT[CG]GAGGCTGAATCCATTTCAGCTCATTTTCTAGATCATCTGGTCCCGCACCCAAAGCGTGGA	0.556714	0.69261	0.656686	0.593444	0.683671	0.825196	0.866669	0.857629	0.898984	0.761534	0.698447	0.687356	0.637354	0.706801	0.576753	0.323261	0.314962	0.344357	0.346098	0.331295	0.32807	0.349608	0.291484	0.308053
cg25830307	C10orf11	TGGGCTCTCATCTTTTCTTCGCGTCAAAATTAGCCGTTTAAATTAGAACCACGTTGGGAG[CG]TAGGTGACGCCAACGTTGCGGCACCAGTCCGGGGAGCACTTAAAAGTAGCCACCTGAAGT	0.343268	0.55925	0.502928	0.371535	0.525219	0.689327	0.939077	0.94147	0.775866	0.78048	0.570374	0.569668	0.419654	0.510153	0.806021	0.916453	0.916458	0.928786	0.927274	0.932644	0.906201	0.958843	0.93443	0.964795
cg00546897	LOC284837	GTCACCCCCGAGGGATGTGTCCTCCACACTCCCTTGATGGTCACGTGGGTCCCGGGAGGG[CG]CGTGTGACTCTTCCCAGGATTGCAGCGTTGGGGCGTTGTGCCAGCCTGGCCCCGTGGGTG	0.573057	0.649304	0.599031	0.603092	0.536616	0.833638	0.825683	0.793145	0.776694	0.836901	0.618656	0.636999	0.607687	0.597755	0.843102	0.819211	0.829814	0.825393	0.826058	0.835433	0.805478	0.82853	0.795209	0.839341
cg15073164	C9orf169	AGCTGTCGTGCTCCAGTTGCTGGGGCCTCTTGGGATCTTGGGAACCCCATCTCTGAGCCC[CG]CCCCATGGCCCCGCCCCTCCCAAGGAGGGAAAAGGCGGCTGCCAGTCGCTCAACTCAGGC	0.491009	0.563274	0.50063	0.457269	0.464941	0.669578	0.60678	0.748369	0.825598	0.832638	0.598051	0.546498	0.470925	0.545186	0.818818	0.675489	0.690527	0.742055	0.732856	0.7106	0.673353	0.730637	0.724307	0.79218
cg11762242		GGCCCCAAGCCACTGGCACAGAGGGCAGGCAAAGGAAAATCGGCACGCGTTCTGAGTAAA[CG]GGGCGCTCTTTCGTGAGTCCATTCAAGGTTCATGTGGCTGTTCTCAAAATAACAGATTGG	0.554288	0.638091	0.482977	0.528515	0.50724	0.81704	0.846302	0.733878	0.875483	0.594281	0.594932	0.501234	0.543003	0.517566	0.74329	0.869937	0.871941	0.871482	0.874823	0.857239	0.858894	0.83709	0.847253	0.866684
cg18635552	IRX1	CCAGGAAGATGGAGCGCTCTTCGGCAGCGACACCGAGGGCGACCCGGAGAAGGCCGAGGA[CG]ACGAGGAGATCGACCTGGAAAGCATCGACATTGACAAGATCGACGAGCACGATGGCGACC	0.27152	0.207051	0.286272	0.233655	0.19589	0.54662	0.450313	0.390279	0.588057	0.0270951	0.238322	0.338716	0.250566	0.141931	0.0934132	0.0190542	0.0276862	0.191911	0.0223902	0.0199666	0.0219175	0.0230843	0.0463256	0.0170503
cg06831064	CASKIN1	CGCGACCGCCTTGACGGGCTTGGGCGCTGTGGGCGGCGGCGGCGGCTTGGGAGACACGGG[CG]GTGGCGTGCCGTGGGCGCGCTTCACCTCTGCGGGGAGGACCACGCTGGCACCGAGCGGGC	0.676122	0.775041	0.695523	0.698905	0.762173	0.962553	0.964917	0.969208	0.95908	0.946555	0.768925	0.694042	0.687662	0.705847	0.928488	0.936261	0.861732	0.916709	0.897022	0.912145	0.864306	0.937074	0.957015	0.9627
cg00300794	CACNA1H	TAAAATTGTGCGCAGTTAGAGGGAGCTGTCCGCGTGTGCTCCAGCTCCGTGGTGGTGCTG[CG]AGCCAACCTCTCCTTTCATTCCTGGAGGTGGGGGACCCGCCCTCATCTCAGGCCTGAAGA	0.659111	0.705425	0.737879	0.671863	0.778131	0.945175	0.794874	0.957741	0.955431	0.568408	0.699793	0.732698	0.747698	0.743517	0.92496	0.97529	0.966005	0.955053	0.963902	0.961969	0.968254	0.978719	0.952643	0.958731
cg16529034	RNASE8	GGCAAAATGTCAGGCATGGAAAGAACCCAACTCGCCATGCTGCTTTGACAGCTGGAGCTG[CG]ATCCCTTCACTAGGAGTGATCATTTTTTCTAACTTCAGTGAGAAACTGGGCCACAGAATG	0.581071	0.616214	0.598356	0.51318	0.533012	0.842967	0.84954	0.832626	0.852834	0.856832	0.611753	0.607221	0.505933	0.531533	0.854061	0.818375	0.820317	0.816619	0.823108	0.811835	0.8085	0.809768	0.780457	0.818206
cg07245624		GCTCTTTCGAAGTCTTCTGGTCAATACTGGGTGTGGTTTGTCTTTTCAGTCTTTGTCAAT[CG]AAAAATGGTGTTTTATCATTGTCTTCAAAAGAGAGAAGATTAGAAGTAAGTTACCCAGAG	0.5215	0.5793	0.538634	0.598769	0.457198	0.863775	0.802416	0.83903	0.876057	0.76861	0.617626	0.61104	0.573563	0.588778	0.533147	0.841406	0.792738	0.806581	0.816398	0.827334	0.81858	0.841871	0.805286	0.836516
cg12926357	TRIM54	TGGGAAACAAAAGGAGAATTTTACAGAGAGAGAGGGATAGCTAAAACTACGTGAGCCTGG[CG]AGGGTGCAGAGCAGAAAGTAGAGACTGTCCGAAGACTGCTATCTGGGACGAGACAAGTTG	0.537607	0.562343	0.541379	0.552591	0.533572	0.65055	0.724249	0.827177	0.821752	0.756341	0.561494	0.592262	0.587032	0.557563	0.762295	0.138676	0.152528	0.141418	0.145568	0.223934	0.181323	0.172075	0.315628	0.142949
cg20888142	SYN2	GTGGGGCCTCTGGTTCCTTTTCCTTCCCCTGGGGAGAAGGCCTGGCTCCCACGCCCTCCC[CG]CATAGTCACGCTCAGGTTGCTGGAGGCCTGGGTCGCCCCCTCCTGCAAGCCCCGAGAGTC	0.187648	0.200528	0.205559	0.162556	0.208985	0.490124	0.344516	0.539618	0.311859	0.317275	0.195656	0.212347	0.163029	0.203275	0.214204	0.073255	0.0935566	0.0762588	0.08035	0.0936119	0.100608	0.0929015	0.073145	0.0800611
cg11138362	PRDM16	TTTGCAGTCTCACCTCCGCAGTGTGTGCCGCCAGAAGCGATGAGCGGAAGCTGTTCCAGG[CG]CCAACAGAAGCTGCCTGGCCCCTGCCTCAGGAAAGCGTCTTCCTCCCACAGCAGGCGTGG	0.68078	0.605154	0.636717	0.596753	0.596551	0.715775	0.91812	0.956152	0.957104	0.785458	0.628942	0.644194	0.610376	0.619514	0.873036	0.902795	0.911783	0.915987	0.905105	0.907668	0.901862	0.903422	0.820283	0.905982
cg26632897	C1QTNF1	GGACGGAATCGGAGCTCTGGAGGCTGGGCTGGCCAAGCGCCCCGAAGGCCCGATGCCTGA[CG]GCTCATGCGGCCTCCTTGTTTGCAGGGCCTGGGCAAAAATTTACACTGAGTCCCACTCTT	0.35323	0.488283	0.393254	0.366932	0.419756	0.621857	0.618109	0.666836	0.620081	0.795712	0.451059	0.405709	0.369394	0.43969	0.600778	0.790045	0.792435	0.789455	0.778977	0.790681	0.791344	0.669791	0.74407	0.76378
cg01597727	MYH7B	TGTCTCTATTAGCTGAGCCCCCCAAGTCTGGGGTGAAAGAGAAGCGTAAGAAGGCAGCAT[CG]TTCCAGACGGTGTCCCAGCTGCACAAGGTAAGGCCCCATCTGGGAGACAGACCCTCCCTC	0.578631	0.611138	0.524259	0.590812	0.612688	0.845616	0.771906	0.794914	0.815516	0.576565	0.573475	0.546249	0.603092	0.551154	0.805812	0.822924	0.819204	0.822085	0.809627	0.820217	0.824719	0.801045	0.760701	0.812376
cg02713319		TTCATTAACTATGATGTTTACAAGCAATTAACTTTTGCTGAAGTACAGAGAACACATATA[CG]CAAGTAGTGGGAAACAAGTCTAGGAAGAAATTATGGCTTAGTCATGGAGAAACTGCACTA	0.364432	0.540203	0.398801	0.448448	0.530888	0.684962	0.785165	0.684179	0.847213	0.772848	0.534564	0.40918	0.422223	0.511762	0.85759	0.88128	0.880831	0.884711	0.872734	0.872473	0.857881	0.856185	0.830467	0.872954
cg06175981	ACCN4	GAAGGACTTACTTACCAATTCACCAATTAAAAACTGACTTTCTAGGGTGTAAGGCCTAAG[CG]GTCGCTGCCTGGGGAATGGTTTTGACCGTTTACCTGGGTCCCGGAGGCCTTCATCCTCCC	0.478526	0.476908	0.423986	0.469057	0.440987	0.602361	0.7611	0.610667	0.763971	0.853938	0.463587	0.469683	0.50535	0.433425	0.853776	0.101915	0.096785	0.084432	0.0947944	0.131987	0.0944967	0.1276	0.247628	0.103433
cg18000216	ERC2	TCATTTGGGGATCTCACTTCTAAATATAATAGTAACCTTTCACCCCCACATTTTAAGTGC[CG]TAATTACATAATTAAAACCAATTATGTCATTTAACAGAGACTTTGTCAAGATACGGCAAG	0.643279	0.677302	0.568346	0.57108	0.579975	0.886615	0.89291	0.8953	0.889378	0.879201	0.708818	0.627571	0.567315	0.601882	0.89589	0.877453	0.884407	0.877039	0.868042	0.862468	0.845776	0.859267	0.849859	0.862377
cg13677043	RXRA	CCAATTAATGCCGTGATCATTTTGCTAATTCCCTCAGCTAACTGATTCTGGAACCTTTTC[CG]GTTGGGCACTGGGTCTCGGAGCTGGGAGGGAACCTGGAGACCCTTTTCAATGTCCTCATT	0.462449	0.528555	0.416472	0.337244	0.41612	0.807063	0.729292	0.665567	0.719675	0.704253	0.516119	0.433577	0.345134	0.468813	0.629047	0.816067	0.801959	0.787571	0.803324	0.827748	0.787094	0.81714	0.764839	0.799119
cg04746089	BOP1	CGGTGCAGGCAGGGGCGGTGCAGGCAGGGGCGGTGCAGGCAGGGGCGGTGCAGGCAGGGG[CG]GCCACTGCTGGGAACTGCCTGACCTAGAAGGCCCCTTCAGATTTTGGAGGCAGATGCTGT	0.387495	0.545005	0.440694	0.364602	0.468984	0.84476	0.814172	0.768016	0.809359	0.869476	0.510771	0.456528	0.355567	0.460543	0.873831	0.835345	0.83796	0.827474	0.829581	0.845526	0.844708	0.851736	0.7774	0.862469
cg25009366	FANCI	AATGATCCATATTAAATACTTAGAAAGGCACAGATAATCCAAGAAAGATGTGGACCACCC[CG]CATCACAGCAGTGTGGCTCTCTCAGAATGTGTAGCTCTAGCTACATGTGGCTAAGCTGCT	0.599487	0.687695	0.646038	0.688082	0.671622	0.894335	0.893837	0.866742	0.844334	0.880653	0.767112	0.681605	0.724826	0.693328	0.832502	0.85474	0.861654	0.840095	NA	0.853734	0.859266	0.856202	0.838711	0.864431
cg16711291		CCTCACACTTACTGCCACGAAGTAAGCATGTGACCTTTGCAGTGCCAGGAAAAACAAGTC[CG]AGCAAGAAAACAACCCACCCTGAAATGCGGTGGGCCGACTGCTTAGGGCTGGGTGGTCCC	0.379859	0.534025	0.402598	0.302754	0.431773	0.656728	0.608428	0.771952	0.697506	0.45454	0.571199	0.428291	0.368268	0.493349	0.662303	0.84658	0.854495	0.876276	0.869602	0.870778	0.856197	0.857347	0.805246	0.867247
cg26019250		GACAACCCCGAGACAGGAACAATTGCAATTGTACACTCTTCCTAGAACCTCTGAACCAGG[CG]CACCCAATGCAAAAATTTGCTGTGTTTCATGAAGCATTTTTTGAGCATCACCTCGCCTCT	0.535736	0.649141	0.654718	0.547451	0.634349	0.82257	0.809319	0.769561	0.87441	0.591978	0.6971	0.674117	0.548524	0.604998	0.181158	0.306843	0.309555	0.325255	0.327184	0.339566	0.321532	0.314971	0.317977	0.313415
cg16528895	SULT1C4	TGGACACAGACATGAGAGCTATAAACAATGTGATACTATGTCCTGTTAACTCACAGAGAA[CG]GAAGGGCTGGAACGGGACCCAGCCAGCAGGGTTTGTGACCGCCTCTGCTGTGACGTCACA	0.477179	0.487325	0.428184	0.469472	0.483403	0.595449	0.657826	0.697921	0.833407	0.68292	0.473558	0.481675	0.49189	0.441725	0.529463	0.697566	0.692226	0.731681	0.73835	0.693749	0.725792	0.697309	0.722199	0.627081
cg08325813	LFNG	CCCCCGGAACCCCCCCGTGCGATCCTTCCAATCCAGGGCAGCCTCACTGTCCTGGACGCC[CG]GCCACTGCATCCTCTGCCCTTGTGTGACCTCCTGCAAGAAGGCGGGAGCACGCCGTTCCC	0.487338	0.534038	0.582385	0.516413	0.587747	0.643779	0.822648	0.83865	0.716055	0.654241	0.562442	0.58756	0.538203	0.542569	0.870883	0.848573	0.83574	0.877473	0.850845	0.835782	0.851697	0.841903	0.762395	0.854757
cg07421682	PCSK6	TGTCCGTAAACGTTCGTTTTTATGAGCCCAGGGCCTGCCGTGTGGTAGGTGTTCACTAGA[CG]ATGTACACTCTTAAAAGCACCCACTGAGCTGGGACCAGCAGTAGAAAGTCAGCTGAATCA	0.648832	0.691865	0.666376	0.611683	0.584834	0.865702	0.860144	0.847287	0.89523	0.882316	0.675075	0.694336	0.619637	0.625853	0.852954	0.883288	0.886797	0.882846	0.877816	0.883026	0.859943	0.889511	0.844327	0.879278
cg23273209		CTCAGCCCCAAACCCTGCAGCTCCCGGGACCCTGGCACCCGGTCACCCTCCACAGCGCCA[CG]GGGCTCCTCTGACCCCACCCTTGTTGCCAGCCCAGCCGGAGTCTGACTTCTCCGTGGTGC	0.501317	0.547333	0.403923	0.367384	0.464402	0.80925	0.749125	0.781109	0.830827	0.720028	0.504358	0.450429	0.3539	0.46818	0.547914	0.842559	0.818319	0.826678	0.807633	0.831936	0.811798	0.831599	0.799962	0.859465
cg00240880	WISP2	TTTTCTCCCTCTCTGGGCCTTGTCCTCAGGTCAGTGTTGTGCCTCCAGCTCCTGCAGAGG[CG]AACTCAGAGGCGGCCGAATGAAACCAAATGGATTTGGCTTGACCCCATCATCTAGCGGTG	0.522022	0.610337	0.499511	0.500204	0.436145	0.862166	0.815552	0.714965	0.658487	0.656796	0.604863	0.538078	0.516186	0.504231	0.595979	0.855935	0.840255	0.857056	0.854824	0.845739	0.837714	0.837011	0.811063	0.846163
cg09265054	GPT	CCCTTAGGGGCCTCAAGCAGGAGGGCTGAGGGCACCGCTGGTTCGTCTGTTCATGGTGGG[CG]GCTTTGTGTGGCCACCAGTGCTGGGTGGTGTGGGTTTGGGCTGTTCTCCCTCCTGGCTCA	0.540524	0.693863	0.576932	0.558568	0.627971	0.719869	0.875626	0.937814	0.930843	0.804323	0.610807	0.639789	0.645664	0.578237	0.934447	0.927102	0.912645	0.909843	0.928178	0.916376	0.894968	0.924515	0.893602	0.917149
cg00202760	CDT1	CGAGAAGGCGCCCGCCTACCAGCGCTTCCATGCCCTGGCCCAGCCCGGCCTGCCGGGACT[CG]TGCTGCCCTACAAGTACCAGGTGCTGGCGGAGATGTTCCGCAGCATGGACACCATCGTGG	0.533012	0.535551	0.573109	0.58877	0.472135	0.812048	0.742556	0.63012	0.823147	0.801522	0.503046	0.586697	0.575508	0.461812	0.781279	0.803171	0.813385	0.771195	0.761006	0.814362	0.776553	0.808999	0.756287	0.785269
cg11473240	KRT31	GAGGGTGTGGACACAGTATGTAATGTCTTTTTTCTTTTTATTTCTTCACTTCTTTTCAAA[CG]CCCTTTCCTTCAGTCTGTTATTTGCCTTCCTCTGAAGAGTCCCTTCTCCCATAAAATTCT	0.372954	0.388349	0.299173	0.182655	0.371354	0.544233	0.530739	0.724671	0.700222	0.660244	0.350921	0.344997	0.160868	0.353498	0.721515	0.791792	0.782542	0.778922	0.768795	0.777025	0.771477	0.7405	0.735899	0.785403
cg21772826	TPRG1	ATTGTTTTGGCACTGGTTCTGAAGCAGGCATAATTGGCAAATTATTATAATACTGCTGCC[CG]AAAATCCCCATTTGCCTCAAGATAGTGGCATTTATTGGCAGAAGCCTCTGAAATGTCCAG	0.338367	0.50486	0.331301	0.330376	0.502972	0.655577	0.790719	0.734415	0.712071	0.830682	0.467746	0.405007	0.396308	0.506939	0.657072	0.839172	0.828596	0.831805	0.856463	0.848925	0.843055	0.877742	0.838891	0.889504
cg09893570		ACATCATCTTCCAGGAAGAGGAGGAGGAGCTGCTTTGGGGACACCCACTTCCTCTCCTTA[CG]TAACAACACACTGCATTTGCACAAGTGTCCTTGGTTGTAAAGGGTTCCACACTCACTTTC	0.423855	0.448293	0.333047	0.381053	0.484147	0.744793	0.563714	0.623015	0.617141	0.5743	0.487951	0.423841	0.422524	0.491071	0.547659	0.791365	0.792425	0.800974	0.780577	0.781323	0.770064	0.799993	0.697456	0.779723
cg03573945	EBF2	GGAGACTTTCCACGTAGCCGGAGGAAACTCCTGCGACATCAGAGAGGTGGAATCCCGAGT[CG]TTCTGAGTCCCAATGGTTATGCTTTAAGACACTTGCATGAAGGGGTTTCCGTGGATCTAC	0.413664	0.33629	0.433134	0.53013	0.469593	0.574162	0.695243	0.762988	0.67081	0.875996	0.33348	0.46088	0.522573	0.381966	0.860021	0.0766785	0.0757411	0.0726541	0.073104	0.0796025	0.0686754	0.0848418	0.0937177	0.0759774
cg08545493	NRN1	AATGCATTGACATTTTTTAAGGGGAATTGGGGCTCGCCGGGGGCGGGAGCGCTCTTGTCA[CG]TTATCTTCCCAGGCGCTGCTGGAGAAGACCCTGCACACCGCGCATGTGTGAGTGTGTGCT	0.339805	0.30003	0.306105	0.267457	0.402227	0.621724	0.656484	0.764515	0.519925	0.588745	0.301047	0.314287	0.281382	0.30169	0.85714	0.0726321	0.0909717	0.0645497	0.0684984	0.0708647	0.0526516	0.0752209	0.068526	0.0662156
cg17104766		CTATTGGTGTGGACTGAAGGGGAATCATTCTGCTGAAGTAAAACATGACTTTGACCTGGA[CG]TCAGAGCAAAGCAAAGGTGGGACACCACAGCATGGGGGGTGCCCAGATGGCAGAGGCCAG	0.294681	0.485666	0.425953	0.409922	0.444507	0.794602	0.654249	0.593795	0.665004	0.755097	0.53377	0.440969	0.379562	0.479134	0.465168	0.761221	0.756333	0.762757	0.799919	0.755944	0.780436	0.800742	0.768088	0.749714
cg25282072	MYL5	CGCCCGCAGGGGCCTCTGCAGCTGTCAGGTCAGCTGTGGGTGCAGAAGCCGATACTCCCC[CG]GCTCAGGCTTGCTGCTATCTTTAGCACTGTGCTCAGACTCCAGTGGCCTGGGAACCCTCT	0.660887	0.574469	0.589698	0.654159	0.631671	0.86234	0.737927	0.862834	0.850613	0.567143	0.537556	0.614034	0.657542	0.566824	0.84327	0.828241	0.823551	0.813669	0.834249	0.823169	0.814776	0.845445	0.803627	0.849796
cg08115682	KCNA5	ACCAGCGCGTCCACATCAACATCTCCGGGCTGCGCTTTGAGACGCAGCTGGGCACCCTGG[CG]CAGTTCCCCAACACACTCCTGGGGGACCCCGCCAAGCGCCTGCGCTACTTCGACCCCCTG	0.601052	0.535786	0.638911	0.614567	0.648987	0.839842	0.72129	0.829386	0.877061	0.756322	0.545583	0.65141	0.629654	0.572719	0.566326	0.653634	0.535652	0.582299	0.655608	0.708688	0.64294	0.823794	0.827506	0.835781
cg24163668	NFATC1	GGAGCAGGCTGTGTTGGCCTCGGCTGCAAAAATGGCGTCCCCTCGGGGTGTCATTAAACG[CG]ACATCCTGGCCCCGTGTGCGCCTCAGTGTCCCTCCTGCTCAGCACAGTCACTGAACCTCC	0.642895	0.655096	0.615395	0.640519	0.561919	0.704318	0.900139	0.87942	0.865782	0.869843	0.621832	0.606814	0.615107	0.580684	0.902742	0.842022	0.831284	0.851036	0.816038	0.843543	0.860524	0.847925	0.799384	0.848057
cg12159023	HCN2	CTGGCCAAGGTGCAGAGGCCGGGCCGTGTGCCTGGGCGGGGAGGGCCGCGGCGCCCGCCT[CG]TCCAGCAACCCCCCCCTGCGCGCCACGTGCAGAGATCTGCCTGCTCACCCGGGGCCGCCG	0.741655	0.736452	0.622653	0.708717	0.665272	0.951259	0.809237	0.946266	0.96292	0.969748	0.725644	0.614237	0.713091	0.670323	0.967037	0.932782	0.918258	0.932703	0.956032	0.952667	0.935345	0.956843	0.930815	0.960236
cg24161057	TSTD1	GTTCCCTCCCAGAGCTGAGACCGGATCCGGAAGCAAGGGCACCGCCTCCCGCGCCGCCCC[CG]CAGCACCTGTTCGCGGCGCCTCTAGCACCAACCCACCGCAGAAGCCCTTAACATTCTCTA	0.427576	0.48851	0.506302	0.550185	0.328908	0.812637	0.90911	0.640134	0.813532	0.767142	0.396272	0.550897	0.569294	0.298217	0.704198	0.0486846	0.0473946	0.185962	0.125639	0.0393773	0.0410226	0.0338797	0.0546252	0.0402241
cg09287356	LOC121952	TGTTCACGAGACACTCGTGGGATATTCCTAGCCTTCTGCCCCCTTAGTTACGGGCATTGC[CG]TCTCACTGCTGTATAACCAGAGGCGTGGGAGCTGCAGCTGTCAGAATCCTAATCCCTTCT	0.652207	0.586459	0.606008	0.56827	0.509916	0.902671	0.686636	0.917481	0.861649	0.620902	0.598693	0.61339	0.593711	0.486113	0.636768	0.855401	0.853159	0.868437	0.840195	0.862667	0.816131	0.845491	0.83062	0.865586
cg24731241	TGM3	GTAGGAGAGGATTCTATAAATGGTAAGGCAATCCTTGGCAGCCTGTCTGTCAGCACTGTC[CG]TGCCATTCCCAGAGGAGCCTGAGAAGAGGCAGAGGAAGGCGAAACATGGCTGGTGAGTGC	0.257746	0.445004	0.329323	0.189651	0.293309	0.730763	0.616913	0.815681	0.875717	0.395173	0.45058	0.339889	0.25829	0.426298	0.593597	0.800228	0.791936	0.819414	0.798337	0.773403	0.75967	0.74561	0.770741	0.785565
cg02909793		GTAAAGGGTTTGGAGGAGGGTTGCCTTCAGGAAGCTGAGCTGGCTGAAATGTGCTGTCTG[CG]GAAGGAAGCCGACCTTCCTCAATGCCAGCCTGGCAGTGCAAGGGCAGGAAGGCAGGGAGA	0.520212	0.562275	0.516612	0.592556	0.483419	0.787493	0.697152	0.729328	0.76963	0.528743	0.601673	0.553653	0.597816	0.543045	0.550323	0.808444	0.802499	0.781737	0.795831	0.815791	0.808741	0.817253	0.741223	0.810894
cg10075287	ZNF385B	CATGAGAAAAACACCCAGCTTCCAGTGCCATGCACTTCAGAGTTGGGACAGCGTGGTTGT[CG]AGGTTGCCTCTGAGCTCAGGTAAGTATTGATATCTCCAGGAATCTAAGATGCAGAGAAAG	0.497975	0.360847	0.413338	0.510992	0.461177	0.600113	0.739384	0.803822	0.625863	0.839781	0.405924	0.437642	0.487224	0.372328	0.8605	0.833375	0.819438	0.836666	0.82843	0.827366	0.82907	0.846899	0.74231	0.824678
cg23238119	C6orf147	GAATCCCTGGCGGAGTCTGACCGTTCTCTGGCGCACAGCCCCGGGGGTGGGCACAGCAGC[CG]CCCCTGCTGAAGGGACTGACGCCTCCGACGACCAGCAGCCAAGTTAAACGCACTGTTCCG	0.704882	0.656417	0.639742	0.557494	0.549157	0.939207	0.822092	0.947957	0.929235	0.791454	0.606274	0.669678	0.585941	0.57644	0.899673	0.813016	0.68251	0.840233	0.811376	0.870051	0.833245	0.951489	0.940553	0.946423
cg18412730	RTDR1	ACTGGGATTGGGCTGAGTGACTGTTTAATCACTGCCCTCTTGGCAGAGATGTTTCTAGGG[CG]TTCCCTGGTGCACTTCTCATCGGTGGCTGCCTGGTGAAGCGGGAAAGTTCCTCAGCCTCT	0.241502	0.455999	0.299262	0.121915	0.257973	0.736945	0.643976	0.48649	0.646389	0.608907	0.465609	0.31617	0.119552	0.370498	0.523596	0.87678	0.869009	0.847366	0.860121	0.876765	0.859804	0.863518	0.839911	0.875137
cg07141215	TFAP4	CGGCTCCCTCCAGCCCCCAGAAGGGAGAGGAGGGCTGGGGGGGTAGTCAGGGAAGCTCCC[CG]TCCCCCGACGGCTCCTCCCGGCTCTGGTCCATGGCGTCACTGTCTGAGGCCTCGGAGTCG	0.5024	0.650784	0.590375	0.585896	0.540826	0.823939	0.840173	0.730314	0.721741	0.785498	0.62748	0.607239	0.617244	0.562485	0.836517	0.849853	0.850512	0.879467	0.84153	0.863254	0.852137	0.859347	0.833564	0.880139
cg20625588	MUC6	GGAGTCCACAAACAGCGAGGCGGTGCCCTCGGCGATACCCATGCTAGTGGTGAAGTCATC[CG]TTGTGTCCCCGTTGAAGTTGCCGCAGAGCCCTGAGCCGGCGGGGCGTGAGCTCGACTTGA	0.643707	0.71508	0.577535	0.53073	0.588176	0.957518	0.854986	0.968312	0.965363	0.970111	0.654429	0.572669	0.526267	0.672256	0.977232	0.968075	0.965513	0.974715	0.965688	0.960461	0.960431	0.960941	0.941715	0.964333
cg26785346	SORBS2	AGACATATGCCCTGGGAGCCCACAATCTGTTAACAGGAAGCAGGTAAACCCGAGAGCGTC[CG]CCTGCGTTCCAGTCCAGTGCCCGTCCCAGCACACACCTGCTTTTTCAGACCTGCCGCTCA	0.383711	0.459504	0.482594	0.493442	0.34387	0.626371	0.803828	0.726629	0.816272	0.281714	0.475841	0.486732	0.485796	0.41028	0.417138	0.828539	0.840371	0.826769	0.8396	0.852391	0.834432	0.844394	0.7406	0.845089
cg15529432	FAM134B	AACTCTATTCCAAACACAGATACCTAAGAGATCCAAAGTTAATTCACTTTCAGGGACCTC[CG]ACAAGATACAGCTAGTTTTAAGAGAAAACACCAGGACTAGCAGAGATCTGAGGAAAATAT	0.586215	0.553548	0.516682	0.446983	0.594501	0.784619	0.651343	0.874637	0.895132	0.659925	0.630464	0.505278	0.479531	0.588421	0.881558	0.835619	0.852286	0.865793	0.856609	0.849656	0.848538	0.838228	0.818219	0.851878
cg04522792		CATAATTTAAAAGCCCCACAGAGGCAGAGAACATCTCTGTCTTTTTCAGAGTTGTATTCT[CG]GTGACACACATAGATTAACTGCTCAATAAATATTTATTTAATGAACAGATGAGTAACTTA	0.301207	0.503723	0.415961	0.244928	0.349326	0.845946	0.853698	0.619934	0.870849	0.895235	0.543183	0.420886	0.296075	0.440606	0.827039	0.894222	0.864836	0.871466	0.875048	0.856939	0.867504	0.86679	0.822198	0.889323
cg19236794	FAM132A	AGGGCTTCCCAGAGGCCGGCCTGGCTGGGCTGCAGCAGATTCTCAAGGCGGGACCGTGGC[CG]AGGCCTCGAAAAGGGCGACCCGGAGGCAGAGCCGGCAGGGACAGAGCCTGCTGGGGGAGG	0.265092	0.394923	0.346358	0.286298	0.282689	0.457089	0.687401	0.632248	0.717927	0.705394	0.401591	0.388249	0.342087	0.337096	0.533343	0.777589	0.778319	0.793198	0.763329	0.817772	0.804357	0.807313	0.6986	0.954061
cg03407594	MUC6	TGCCCTCGGCGATACCCATGCTAGTGGTGAAGTCATCCGTTGTGTCCCCGTTGAAGTTGC[CG]CAGAGCCCTGAGCCGGCGGGGCGTGAGCTCGACTTGAACCCATCCCTCCTGCACCCATTC	0.467813	0.591065	0.467297	0.39735	0.478014	0.802263	0.630565	0.822384	0.750025	0.596731	0.537253	0.489938	0.392023	0.517375	0.80824	0.852673	0.839382	0.844085	0.804742	0.838478	0.825491	0.851426	0.795525	0.850975
cg25813864	RAPGEFL1	TGAAGCCGCTGGAGAAATTTCTGAAGAAGCAGACGTCGCAGCTGGCGGGCCGAACGGTGG[CG]GGAGGTCCCGGCGGGGGTCTGGGGAGCTGCGGTGGGCCTGGAGGGGGTGGGGGACCCGGC	0.263697	0.300903	0.336249	0.3677	0.429466	0.626445	0.658414	0.69971	0.644	0.832454	0.251556	0.331704	0.403946	0.392075	0.659367	0.0270776	0.0290143	0.0305091	0.0279925	0.0253914	0.0313322	0.0299781	0.0400857	0.0301955
cg21949355		AGAAAAAGGAAACAGTGAACTGTTACCATGGCGAGCTGTGCAAGATGCTGAGATCTGAGA[CG]AAATTGAAATACTGAGATATTGATAAGGGCTGAGGCGATACTGAGATCTGGAGAGAGAAG	0.587373	0.527774	0.568539	0.615405	0.564053	0.754465	0.775298	0.892686	0.875689	0.550784	0.557718	0.593204	0.586514	0.540716	0.687127	0.271368	0.288632	0.246977	0.296854	0.291372	0.254651	0.302368	0.381684	0.264466
cg09494378		CGTTCCCTGAGCGCCTAGCAGGCTGCGTTTGTTTGGCTTTGAAGCCGTTATCCCCTTGTC[CG]CAATGAGAGGTGCTGGTGTCAGGCCTGTGTGTCTGTGATGTGACAGAGCGGGACTGAGCT	0.506911	0.463556	0.535261	0.590724	0.636533	0.888024	0.84579	0.849076	0.874817	0.890294	0.469321	0.565438	0.602837	0.477717	0.904368	0.19866	0.204144	0.211251	0.231785	0.231202	0.20882	0.221396	0.222576	0.212281
cg04549333	ALX4	CTGATGGCCGGAGAACCCTGCGCTGCGGGCGCACATGGCCAGGTGGCGCCTGGCAGGCGA[CG]TCCGGGTGCAGGACGGCGCTCTTACCGCCCCACCCCAAACCGTTGCCTGGGCCTAGGTCC	0.428779	0.636862	0.595344	0.424616	0.459756	0.946592	0.941519	0.793273	0.941738	0.494954	0.674447	0.566744	0.425929	0.537403	0.208327	0.0278948	0.0303102	0.0269167	0.0258154	0.0259166	0.0274199	0.0240211	0.0414499	0.0342752
cg02710296	C1orf14	GGAAGCCCCAGATGCCTGTCCCCAGGTTCCGACGAGCTTCCGACCGTAGTCTTCCTGTCC[CG]GATCCGCTCACCTTACAGTCCTGCAGCACTTCGTCGCAATACAGCGACACCTTCTCGTCC	0.547717	0.54536	0.498598	0.400635	0.311444	0.919775	0.656469	0.971156	0.915829	0.676074	0.497232	0.536015	0.428647	0.376181	0.748238	0.957964	0.950738	0.928703	0.946705	0.954349	0.958036	0.95272	0.941331	0.954275
cg03895392	ISLR2	GACCTCTGAGCGCAAGTCCACAGCCAAGGGCCGGGGCAACAGCGTCCTGCCTTCCAAACC[CG]AGGGCAAAATCAAAGGCCAAGGCCTGGCCAAGGTCAGCATTCTCGGGGAGACCGAGACGG	0.511016	0.427358	0.43853	0.593659	0.536014	0.797986	0.709313	0.838343	0.820936	0.71726	0.43151	0.481484	0.571913	0.450711	0.489876	0.141942	0.144578	0.163629	0.167686	0.163233	0.145452	0.156613	0.149372	0.185056
cg00923880		CAAGGCTAGGAAAGGGGAAGTAACTTGCCCAAGGTCATGCAATTAATAAGTGGAAGAAGC[CG]CCTGGAGCTCAGGTCTCTGGAACAGCAAAGACACAAGCTCACTGCACTGTAATGTAAACG	0.365276	0.471821	0.417309	0.326193	0.334263	0.584285	0.662315	0.86609	0.778648	0.590783	0.448293	0.503186	0.414657	0.414036	0.64297	0.693413	0.671588	0.705266	0.704828	0.743539	0.748292	0.711515	0.666139	0.681005
cg26476939	TNXB	GGCCAGCCACAGCTGGGGCCAGTGTAGCCGGGAAAGCACACGCAACGACCACGGACACAG[CG]ACCCTGATCATTGCAGTCATCTGGGCAGGACCCCGAGGCTGAGGGTGGGGAAGAGGGAGG	0.460952	0.487056	0.431343	0.460062	0.397001	0.718948	0.797217	0.703707	0.540441	0.609424	0.460612	0.46469	0.457216	0.38037	0.300629	0.5782	0.559074	0.555362	0.609311	0.619875	0.587353	0.758531	0.656332	0.789066
cg09875523		CATCGTGACCGCTAACCCGGTCCCTCCGCGGCCTTGGGTTTAAAAGCGTCTGTGTCCAGC[CG]GGAGGTGAACTCCTGACAGCAACGCCCGTCCAGCCCACACCTCTGCCTGGCAGTGTGCAG	0.572187	0.475517	0.467049	0.53719	0.477045	0.820333	0.728543	0.838256	0.786096	0.474022	0.455159	0.515283	0.497857	0.42603	0.48476	0.802795	0.793585	0.811203	0.777136	0.798254	0.787607	0.791735	0.723156	0.803011
cg18812386	TRAK1	TCCCATGGATAGGAAACCAGTGAATTCCGTGGCTGGCACACCACGAGCTGTCACGCGGCA[CG]GGTCATAACACATCTGGGTGTCATCGGACACCTCACCTCGCCCACCCTGTAGGAGCGTAA	0.63308	0.613835	0.705337	0.599398	0.636922	0.858646	0.780218	0.834418	0.88233	0.660368	0.601405	0.724609	0.591822	0.628158	0.413667	0.8523	0.832534	0.848906	0.825492	0.84908	0.831261	0.850447	0.833596	0.830778
cg14676272		TGTGAGGTCTGGGCCGCTGTCAGAGCAGGGCGAGTCTGCGCGCTGATGGCGTGAGTCAGA[CG]AAACAGGTGCTCTGCTCAGACACAGCGGAGGGCATGTGGCGCCAGCACCATGTGGTAAAA	0.5544	0.521296	0.584249	0.597838	0.439493	0.806561	0.693574	0.913372	0.939769	0.936544	0.546689	0.618472	0.559202	0.448522	0.939036	0.885514	0.883455	0.902466	0.872506	0.892181	0.848324	0.891629	0.823015	0.891752
cg03292992	CD59	GTAGTGCCCTGTTATCACATCACTGCATGTTTATCTCTGGCCACCAGCTAGAGCCATTTG[CG]TGGGGTATAGTACTGGAAACTGTCAATGGTGACTGAGACTTGCTTCTGTTATTAAAAGTT	0.240157	0.472966	0.305727	0.268734	0.208076	0.526261	0.722212	0.690557	0.735504	0.304071	0.442332	0.289215	0.269894	0.336767	0.564702	0.834496	0.837657	0.840738	0.837211	0.818725	0.797624	0.812917	0.76864	0.810752
cg10749822	ALX4	CTGCTTGGTTTTGATAGGTTGTGGTTTCACCACCACTGCGAGCCTCAAGGCCCCTGGCAC[CG]CCACAGCAAGGGAAAAAACTTTGCGCGTGCAGCCCCTCGATTTCGCTTCATGACAACCGT	0.491846	0.582627	0.542939	0.426713	0.427118	0.699948	0.794054	0.747777	0.819123	0.60201	0.594689	0.546155	0.407049	0.464027	0.295451	0.168414	0.164105	0.163256	0.155085	0.159885	0.166754	0.169295	0.167427	0.149033
cg21382567	TGFBR3	CACTGTCCACCTAACCTAGAGGCACTCAATGTTACGGGTGTTCCCAAAGCAAATGCCTGC[CG]TTGGCATCTCTGTGGGAAGTTCCTGTCCCTTCAGAATAGCTGCCCTACCAAATAAAGCCT	0.563441	0.500473	0.488524	0.505209	0.549338	0.801604	0.731687	0.852481	0.869953	0.873312	0.510308	0.525674	0.503643	0.505854	0.867013	0.775536	0.773602	0.770293	0.746033	0.769823	0.742445	0.745219	0.688089	0.769345
cg16361302		GCACTCCGCCACCGCGGCTGCAGCTTCTGCTAGCTCGGAGCCTGCGGACTCCAGCCGGCG[CG]AACTCCGCCGCGACTCTTTCTGGCTCTCTCGCTCACTGCCTTCGGGGCGGAACCGCGGGC	0.512275	0.52244	0.590703	0.38902	0.395812	0.919678	0.807719	0.869186	0.902218	0.497271	0.52356	0.575487	0.403993	0.476007	0.521144	0.0659694	0.0616702	0.0570522	0.0729476	0.0673067	0.0727765	0.0569686	0.0852935	0.0496692
cg08718050	SHANK2	AGGACACAGTCCCCCTAAAACACACCAAGTGCAAAGCCATTGCCACCCCGTCTCACCAAG[CG]CCGGCAGGACTGCCCAAGTCCCACGGTCCTCCCGTCCCCGCAGCTCTCGTAAAGAACAAA	0.343674	0.486144	0.170787	0.18671	0.283369	0.853958	0.72091	0.92311	0.911638	0.612121	0.466479	0.261921	0.189759	0.411228	0.265552	0.906603	0.89457	0.881911	0.916078	0.923633	0.887929	0.929358	0.890026	0.897759
cg14478589	GSN	CCTGATGCTGAATCTCACTTCCCCTTCCAGGCAGGGTGCCCAGTCTACCCAGGATGAGGT[CG]CTGCATCTGCCATCCTGACTGCTCAGCTGGATGAGGAGCTGGGAGGTACCCCTGTCCAGG	0.631499	0.673629	0.625612	0.604935	0.57985	0.861948	0.844807	0.827302	0.84009	NA	0.684812	0.7011	0.616423	0.597831	0.803419	0.826209	0.830605	0.808929	0.81046	0.822704	0.819841	0.823488	0.783586	0.809098
cg08937102	NADK	GCCCGCGGAACCGGCTGGGCCCCAGGGAAGGCACCCTCAGGCCACAGTCAGGTGGAAGGG[CG]TTCCCTGCCTCCTAGCCCGCTGCGTCACTCTGCTTGGCTCCGGCCCAAGGGCGTGCAGGT	0.506991	0.592991	0.52677	0.483005	0.483669	0.749542	0.760171	0.732383	0.737547	0.532853	0.588639	0.547892	0.477092	0.533418	0.752629	0.743209	0.745535	0.770506	0.739806	0.76525	0.760432	0.756545	0.726716	0.781944
cg12129012	NRXN2	CCAGATTCCAGACAGCAAGCACATCACCATGGACAGAGCCCTGTCTGTGCCCAGAGAGGG[CG]GGAGGAAAAAGCCGGCCAAATGCCCCACTGGGCAGGCAGTGAGGCAGGAGGGATCAGAGG	0.482577	0.586388	0.5258	0.507636	0.59051	0.750494	0.744222	0.727305	0.743362	0.755205	0.579067	0.584806	0.521952	0.601641	0.752378	0.277408	0.264941	0.294721	0.323817	0.345758	0.328999	0.232438	0.315695	0.259161
cg02577963	KDM4B	TCTGGCCTCAGCAGCCGGCCCACAGCGTGTTACAAACACGTGTACTTTCCCAGTCCCTGC[CG]CTCGTCTTCCTGGCACTGTGGAGCCTCGAGTCCTCAGCCCGCCAGGCCACCTGCTGGATT	0.592504	0.737808	0.631175	0.632255	0.643297	0.911382	0.788927	0.827081	0.893076	0.907568	0.731663	0.659425	0.663829	0.732894	0.867194	0.920014	0.904108	0.92345	0.908514	0.920612	0.900745	0.919959	0.891172	0.92146
cg04668516	HAMP	CAAGACTCCCACTGCTGCTGATTTCAGGATACCAGCATGATGCCACTGAATGCAGAGTTT[CG]AGATGTGCATGGTCTGCTATGTTGAGCCAGGTCTAGCATACCGCTGTGCCCTGCTGTGTT	0.561194	0.579141	0.645177	0.609281	0.533945	0.840763	0.758201	0.903748	0.866946	0.492686	0.580822	0.637291	0.615709	0.540401	0.54885	0.819943	0.810835	0.815347	0.82587	0.812719	0.832315	0.815275	0.780308	0.807992
cg07895657	PANX2	CCCAGCGCCAACCCCGCCGAGCCCGACGGCGCCGCCGAGCCGCCCGTGGTCAAGCGGCCG[CG]CAAGAAGATGAAGTGGATCCCCACCAGCAACCCGCTTCCGCAGCCCTTCAAGGAGCCGCT	0.57464	0.513514	0.63095	0.616083	0.525283	0.842369	0.799382	0.858686	0.79653	0.404658	0.495791	0.661585	0.586929	0.522091	0.795268	0.714792	0.63337	0.603601	0.678328	0.802144	0.748663	0.816202	0.823275	0.85689
cg03124514		TTTCAATTTCTAAAGCAAAGTGTTTAACTAGATAACTTCATCCCAGATGATAGGACTTTA[CG]TGAATCTCATTAATTCCATGTCTTGATGTAATTTGCTCCTAAGATTAAGGTTCCCACCCA	0.306944	0.550868	0.355138	0.312399	0.32134	0.890033	0.836901	0.724919	0.643026	0.463321	0.519977	0.375809	0.370247	0.422816	0.438112	0.843417	0.804302	0.846505	0.80922	0.828858	0.800213	0.833507	0.868731	0.87689
cg24974365	HAND2	TTGTCGTTGCTGCTCACTGTGCTTTTCAAGATTTCGTTCTGGACAGAGGAAAGGCGAGGG[CG]AGAAAAGTGGAAAGAGAAATTCAGAGAGGATACCTGGTTCCACACCAACCCGGAGCTTCC	0.533153	0.505048	0.592941	0.393966	0.411276	0.818962	0.784436	0.835422	0.821543	0.530102	0.523645	0.619981	0.388228	0.440345	0.776546	0.0973474	0.0931555	0.0848191	0.106042	0.0923499	0.0873389	0.0919497	0.0958147	0.092782
cg17528218	LRRTM4	ACCTACGATATTAAAAAAAAGACAGATGCACATTGTGAAGCTATTAAAATAAATCACCGT[CG]GTTTACCAACAACAGGGGCATTTCCTCTAGTGTAGGAATGGGACAGTTGATTTAAGGAAA	0.613326	0.604471	0.575968	0.511363	0.500018	0.777249	0.744384	0.87484	0.756632	0.314257	0.588173	0.615533	0.527448	0.518335	0.638375	0.815048	0.860513	0.834394	0.799637	0.831379	0.788841	0.836219	0.799115	0.817279
cg10601057	CAB39	GTCTTTCACTGCCAACAACCAAACAGATGTGGTGTATGTGGGGACTATTTACGCACTCTT[CG]CCCACCACATGCTGTATAAAGGAGGTATGGCTGCCTTGCTCAGCTTATAGGTGGTTCCCT	0.340161	0.49656	0.412224	0.295254	0.529458	0.599303	0.8311	0.878923	0.89543	0.906038	0.552459	0.404673	0.303568	0.516153	0.900399	0.906931	0.87584	0.900223	0.899557	0.894278	0.873226	0.88766	0.865767	0.89123
cg16738646	SLC2A1	GCCAATTCCTGACCTTAGGTGCCCAAACCAGCCTAGCTGACTTCAAGATACTGGGCTGGC[CG]GGCCATTTCCTGGGGAGAGAGGGGAAGTATGATCTTCTCTCTCTGTAGCCAGGTCTCAGA	0.54884	0.588001	0.517787	0.419706	0.505634	0.81638	0.834907	0.637228	0.79892	0.859665	0.592949	0.555539	0.45049	0.546795	0.841991	0.835344	0.806007	0.831242	0.829435	0.828162	0.81884	0.825279	0.795605	0.819141
cg04183804		CAGACATCTTTCCTGTTGTTTCTGTTTGTACGACTTAGTCAGGAAAGATACCTTGTTAAA[CG]TTGCACAGAGAGTGCAGCTTAACTTGCAGAGTAAGTTGCTTACTATACAGCACATTTAGC	0.53918	0.483131	0.574059	0.567988	0.478045	0.804173	0.620208	0.828534	0.762283	0.656264	0.516072	0.550763	0.592871	0.440185	0.269066	0.822737	0.832422	0.797058	0.800817	0.793081	0.787591	0.774864	0.734949	0.800776
cg12472022	DAGLA	GCACCTCTAGGAAGCTTTCTCTGTCTGCCTGGGGCTGAGCAGTGGTCCAGGCATCAGTGT[CG]GAGCTCTGTGCTCACTGACCCGCCCCGGTTTCCTTGTTATTCTGCACTGTGAGCTACTTG	0.490708	0.537783	0.509412	0.511437	0.433252	0.772306	0.676998	0.861787	0.801678	0.449257	0.592153	0.582032	0.593746	0.556078	0.551508	0.67245	0.686446	0.703229	0.70795	0.713825	0.718265	0.692033	0.675488	0.716451
cg10929387	ITIH4	CAGCAGTGAAAGCAGGACGAGAACTTTGCTGCAGGTACGGACAGGCCTTGGGGGCTTCAT[CG]TGGCTCCAGTGTCTGCCAGGAGGCTTCTGAACTCGACAGCAAGTGGGGAATGGATTAGTA	0.264052	0.4771	0.318984	0.232152	0.29028	0.861117	0.796532	0.748419	0.798246	0.761321	0.427613	0.326086	0.239306	0.349809	0.597066	0.810681	0.805919	0.850422	0.816851	0.802956	0.79935	0.788532	0.737687	0.778874
cg07289133	FAM92B	CAGAACTCATTGAAATTCCCAGTGCACAGGCCCAGGCTGGTGGCGGCTTCCCTCTGTGAC[CG]ATCCCCAGGTGCCCACTGGGCTGTGCCGGCTGGCTGGCCCCTCCTCACGCTTCTCCAGTG	0.551847	0.567192	0.60733	0.510531	0.518791	0.801461	0.634778	0.789025	0.792947	0.546238	0.556441	0.620653	0.520755	0.523379	0.775872	0.76292	0.755957	0.759324	0.753992	0.777655	0.756197	0.767046	0.726415	0.778067
cg14662585		CGGGGGAGGTGGCAGCAGGGCTGGCCCTGAGGGGCGGGAAAGGTCCTCAGATGACCCTTG[CG]GGCGCGCACCTCCAACGTCAAATCCCAGTGGCTTCAGCCTCGCGCCCTGAGTGGGGTCTG	0.603033	0.669486	0.64275	0.554925	0.643468	0.961234	0.893764	0.97352	0.962735	0.728366	0.657155	0.638418	0.581525	0.603419	0.968032	0.878933	0.855892	0.90162	0.905723	0.917143	0.854188	0.893368	0.825859	0.900814
cg17002156	GLT25D2	ATTTAGTAGACTGTTTACATTTGTCACAAATGAGGGGAGGAATTTTTAATGGTATGCCAA[CG]GGAAAAATCTAAGAAAATTAAATACAAGAAACAAAGAAACCAAGATTAGGGTATATAAGG	0.418038	0.581259	0.426974	0.400552	0.541907	0.875538	0.85482	0.836535	0.676263	0.882983	0.575812	0.415906	0.38079	0.53896	0.868116	0.856561	0.871329	0.83873	0.837557	0.864073	0.826461	0.867503	0.836573	0.899386
cg06280734		GGGACTGCAGGGCCGGGTCCAGGCGGCCACTGGGGAAGCTCACCTGCGCCAAGGCCCACC[CG]GGATGACCCCACCGCCAGCACTTCCAAGGGGAAGCCCCCGTCATGAAGTGTTGGCCAGAG	0.525055	0.522841	0.525735	0.53383	0.376078	0.833378	0.829328	0.808982	0.819696	0.702391	0.496685	0.561194	0.525144	0.413768	0.487888	0.845617	0.831193	0.868182	0.83779	0.858271	0.805779	0.835198	0.793435	0.829801
cg26764198	ZCCHC14	AGGCTAGTGGCTGCCACGCTGGGCGGTGTGCTCCCAGACAGCGCTGTCTAAACCAACACC[CG]CCCGTCCGTGAGCAGCTCTGTGGGCCTCCACATGCCCCTCATCTGCATGTCCTCTGTGGC	0.50508	0.598357	0.519935	0.412072	0.464497	0.671569	0.778528	0.803289	0.818855	0.817014	0.630627	0.514331	0.396004	0.481845	0.703174	0.820277	0.810676	0.80767	0.833455	0.818175	0.80906	0.829067	0.812479	0.824727
cg26343883		TCGCCGCGGCGGCCGCTGTTGGCTGCCGCGCCGCTGGGACTGAGATGACTGTGGCTGGGC[CG]GCCACGGCAGCTGCTTCTGCCTTGACTGCTGCCCCTGACCCTTCTGCTGTTTCTTCCTTG	0.351094	0.327122	0.376032	0.320128	0.439807	0.524812	0.518823	0.70783	0.606516	0.850742	0.298397	0.393773	0.296803	0.336478	0.841484	0.142774	0.134665	0.122098	0.129937	0.141314	0.138945	0.138733	0.129947	0.138614
cg00138126	PMEPA1	AGCCACAGCCAGCACTAGGTCAGGACCCAGGCCCCGGCCCAGGAGTGGGGCAATACCCAG[CG]TCTACCCCAGATGGCACCCTGCTGTGAACTGGGCGCCCTCAGCCCCTGCCTTGAGGAAGG	0.46254	0.452167	0.436851	0.420421	0.388589	0.554212	0.600498	0.629034	0.76602	0.589248	0.449729	0.48331	0.433521	0.400122	0.78293	0.651618	0.633379	0.65248	0.688106	0.631553	0.619986	0.592612	0.591677	0.652184
cg07415373		CGGCCACCCGCTCCCAGCCTGACGGATGGCCCGAGCCATCCATCTACATTATGTCATGGG[CG]GTGAGCCTCCTCCTCCGTCCAGTCCGTCTGGCCGTCCAGGACCAGCCATGGCCTTGGCCG	0.287979	0.478736	0.29158	0.282471	0.293373	0.788914	0.561244	0.533958	0.781682	0.731593	0.4557	0.321597	0.279282	0.326485	0.491161	0.653095	0.606302	0.658506	0.654041	0.693612	0.610178	0.698361	0.738058	0.744418
cg10224806		TGAGCCGCAGTCTGAGGGCCGGGCCCTGGCATGGGCTCCATCAGATCCCGTAATCGGATC[CG]GGCGCTTTAGCCCTCACGTGACTAGGGGCCACCGCCTAACCCTGATTAGCGCTCTACATC	0.433508	0.662684	0.516316	0.504975	0.538765	0.846372	0.847951	0.915054	0.667016	0.708899	0.57994	0.528655	0.519034	0.630818	0.717553	0.895687	0.889712	0.921245	0.9077	0.894348	0.858288	0.915311	0.907697	0.925902
cg12175922		GCTGAGACCACAGCCACTGTGAGAGGACCAGGGAGTAATTCCTGGAGGGATTCCGCAGGG[CG]CAATCAGAGGGCCTTTGGGGGGTTTCCGAGGCCTCCCCTCTCCATTTCCTTCCTAATTGT	0.600737	0.653378	0.621333	0.57966	0.585286	0.842276	0.865368	0.788372	0.90055	0.853739	0.648497	0.614963	0.574681	0.584725	0.868555	0.743311	0.737048	0.807636	0.76996	0.774583	0.766938	0.783061	0.759386	0.827164
cg00474713	ATP2A1	GTCCACCCTTCCCCATTCCTTTGGTCTGGAGCCCCTGCTTGGTCCAGCTTCCCCAGGCCC[CG]ACACCTTTCTGTGGGGTCTGCCTAGCTCCTGCACGCACACAGCATGGGCCTGATCCTGTT	0.537551	0.570084	0.621788	0.598557	0.555152	0.874066	0.803748	0.819334	0.874574	0.858377	0.588286	0.647957	0.603035	0.566251	0.877971	0.737092	0.709052	0.786418	0.724603	0.752463	0.734383	0.749865	0.731786	0.777525
cg23166857	TNFRSF4	GCCCCAGGCCCAGGAGGAGCAGAGCCGCACACGGCCCGCGGCCCAGCCGCCGAGCCCCCA[CG]CACATCCTCGTCTCTGCTGTCGCCAGAGTCTGGGTTTTCCTTGCGGGGTGTGGCTATAAG	0.540644	0.634893	0.632292	0.619559	0.660819	0.792507	0.803041	0.892567	0.876842	0.903358	0.659224	0.63522	0.631143	0.62221	0.920355	0.79586	0.801078	0.862261	0.838955	0.837951	0.837904	0.851509	0.821345	0.882456
cg09453252		CCAGCCCAGCACTGTCCTTTAAAACCAGAGGCTGTGGATTCACCTCATGTGTAGACAGTG[CG]ACGGAATCACCGGGGTGATGCGGATAATTTCAGAACAAAGCTGGTGCTGGGGGCTGGGGG	0.588302	0.667283	0.501637	0.539234	0.520185	0.857403	0.814944	0.767492	0.796385	0.690207	0.673218	0.468983	0.58477	0.521155	0.752293	0.871031	0.860367	0.872909	0.89142	0.885356	0.878249	0.872226	0.887673	0.85904
cg05027713		CTGCCTCATGGCTTAATTTAATTAAGTATTCTGTAATAGCTCTGCAGCAGACTTGTGCTG[CG]GAATGGGCTCCAATTTGCCCTATGGCAACTGCAGGAGCAGAGCAACTATAAGATATGCAA	0.716241	0.655435	0.662677	0.661895	0.634466	0.825533	0.891609	0.855706	0.896695	0.674719	0.688629	0.646633	0.664893	0.605225	0.887365	0.883879	0.874457	0.874604	0.853858	0.850725	0.856492	0.877079	0.810083	0.863901
cg02288964	AGRN	GAGTGAGGCCAGCAGGGGTGGGTCTCCAAGTGCTTCCTTTGACAGCTGCTCTGGATGGGA[CG]TGGCTTGGGGTGGGTGAGAACCCTTGGCTGAGTTTGGATTTTCCTGCAGGGTTTCATTGG	0.393622	0.531079	0.485954	0.390498	0.374927	0.599077	0.703785	0.700731	0.774491	0.498974	0.581857	0.539992	0.468459	0.475511	0.729849	0.809813	0.775905	0.78828	0.793358	0.79072	0.769235	0.770882	0.735573	0.787646
cg07229688		TTAACTAGGGCAGACTGGGATAGGCCAGTTCTTAAGGCTGGTCGTAGGCCAGCACTGGGG[CG]GGCAAAAACAGTTTGAGTCAGAGGAAGAACAGGCAACAACACGTCCCAGCAGAGTCTTCG	0.198439	0.397689	0.334492	0.253493	0.283371	0.749012	0.534038	0.476472	0.723611	0.761849	0.408023	0.326769	0.250195	0.362057	0.665173	0.741552	0.729544	0.754803	0.753688	0.742749	0.736394	0.65832	0.654399	0.756233
cg24586685		ATTGAGGACAGGTGGGAGAATGCTCAGGCCTGAGAAAAACTGATAGCTCATTTCTCCCTT[CG]AAGAGAGATGGCTGTTATGACTACTGCTGGTTTAGATAAAATAGATACAGACTTTGTTTA	0.398568	0.596826	0.513099	0.48618	0.493973	0.783593	0.763716	0.743854	0.640162	0.284486	0.588031	0.577854	0.449422	0.533696	0.327088	0.836584	0.834641	0.810272	0.804663	0.837043	0.83253	0.881072	0.810453	0.835875
cg11130955	IFLTD1	ACTTAAAAGACAGAAAACCAACTTTGTTGAGATATTCCTCAATTACTTAGTTGATATCAT[CG]TGAAAAAGAGATGATACAACATAGGAATTGACTCATTAAATGATACAATATCATTTAGCA	0.321143	0.496335	0.358097	0.212017	0.37874	0.656493	0.763955	0.744884	0.828231	0.178139	0.510297	0.328516	0.206844	0.413027	0.161992	0.814584	0.837459	0.80203	0.842778	0.852041	0.81875	0.834921	0.802482	0.843717
cg26130533	LOC100130872-SPON2	CACACGCACACGCCGCCCGCCCACCAGGCAGACACCCACACACCTGTGCACGCACGCGCA[CG]CCAAGCCAGCGGGCCCTGCCCCTGCCCCGGAGCCCTCAGTGTCAGAACCAGGCTGCTGTG	0.425254	0.575518	0.408681	0.299016	0.401829	0.693838	0.893805	0.843394	0.917689	0.574035	0.557541	0.454474	0.29328	0.457668	0.892823	0.870926	0.867306	0.88815	0.867175	0.914151	0.883056	0.902706	0.853423	0.887047
cg06348737	GPR153	GTGATCCTCCCATCTAAACCTCCTGAGTAGCTGGGATTACAGGGCAAGTGCTCCCACACC[CG]GCGAGACATAAATCTGTTCTTCATGAGTTACTGCGTCTTAAGTACTGTGTTACAACAGCA	0.655503	0.663416	0.607827	0.553224	0.612258	0.839566	0.827751	0.838612	0.8484	0.633285	0.620375	0.616208	0.561508	0.60706	0.645132	0.858918	0.848676	0.864634	0.825191	0.82734	0.828155	0.823504	0.817141	0.845432
cg25330016	C1QTNF1	CGACGGGGCACCAGGCCATAGAATTCCCAGGTTCTTTCCTCCCTCTGTTTTGGGAGCGGT[CG]GTCCCCGAGGGCGTCCCCGCTGCTGGTGCTAGGGAAGTGGGCGGCGGGCCAGGCCACCTG	0.361017	0.518084	0.426696	0.358053	0.461838	0.621453	0.698828	0.748394	0.806859	0.816626	0.505445	0.434673	0.377186	0.471282	0.629136	0.809842	0.79802	0.832946	0.809292	0.793873	0.798258	0.717586	0.787047	0.803192
cg26804891	ZNF598	CACAGCAGCTGCCCTCGCGGCAGCTGGCACCCAGCCCTACCTTCCACTCACTCCCAAGGG[CG]CCTCTCCAGCCCGACCCTCACAGGCGCAATCTGTGCAGCCACTCAGGGTGCTGCTGGGAC	0.541985	0.653221	0.539677	0.615464	0.603097	0.82019	0.85206	0.80923	0.833827	0.808703	0.658775	0.552203	0.624762	0.621897	0.787417	0.812936	0.812104	0.798536	0.808534	0.842133	0.809129	0.827869	0.80522	0.847571
cg25800500	ANKRD23	GCAGACGCGGGGGCGGGGCACAGGATGGAATGGTGGCAGTGCGAAAGGCGCGGCGGGGGG[CG]GTGCTGCGGTCAGCACCGGGTGCGGGGATGCGCCACGTGGGCCTGCAGGGCCTCCCGGAT	0.311575	0.467068	0.505216	0.318441	0.186293	0.8825	0.612358	0.886907	0.771961	0.3881	0.469744	0.498149	0.373632	0.27194	0.252848	0.832376	0.773826	0.852396	0.892918	0.878035	0.843364	0.943365	0.937916	0.951428
cg18713687	MUC4	CGCCGTCTTCATGGTCAGGCTGAAATGTCACAGTCTGGTTATCCAGCAGGACACGGATTG[CG]TCGTGAGGCTCAAGGAGCCATTGGACCTGGAAGGAGATGGGAGGGGGCCTGAGCCCGACC	0.606352	0.590871	0.552909	0.668813	0.653228	0.878654	0.858336	0.77013	0.840685	0.906711	0.575723	0.597232	0.653627	0.736593	0.881702	0.744898	0.670993	0.732789	0.796747	0.815362	0.781132	0.876892	0.819949	0.853532
cg24842260	C10orf41	GTTGTCTGGTCTCCGGGGAGCAAGTCCCAGGTGCGCGTTTCGGAGGGCGGGACAGTCCTA[CG]CTGTCTCTGCGGGGCAGCGCGTCTGTGAAGCACTCTTATCCTTCGGGTGTGTCCATGTGT	0.346769	0.551623	0.456633	0.414937	0.347884	0.741285	0.940689	0.823389	0.91729	0.959453	0.54684	0.44485	0.445888	0.388733	0.907858	0.0408339	0.0272218	0.0372959	0.0302663	0.0362224	0.0353194	0.039255	0.0254652	0.0377738
cg21550372	WDR25	AACCCTCTCTCTTGCCCCTGAACTGCATAGGTTTCAAAGGTGATCTGTCCCCTTGTATCT[CG]ACCTGTTGCTCAGGAACCATTCCCATCAGTTTAATTTCTTTTTCCTTTTAATCCTGTGGC	0.298614	0.498962	0.425305	0.299011	0.331156	0.796586	0.638018	0.8148	0.643783	0.332786	0.57867	0.440511	0.287416	0.494217	0.58829	0.814114	0.797384	0.794726	0.77484	0.787868	0.782476	0.787032	0.752299	0.811191
cg21161138	AHRR	CTGAGGCCGGGGCTGGTGGTGCAGGACACACCCAGGGCGTGGGGTCCCAGGCTTAGGGAT[CG]GCAGGGGTGGCTCCCCAACCACCAGGACCCCGGCAGGATGGGCCTGGCGCTTCTGGAGGG	0.605084	0.588872	0.584111	0.580318	0.550653	0.848777	0.827791	0.850767	0.865314	0.719467	0.599821	0.584173	0.57811	0.554002	0.500406	0.780546	0.767384	0.78752	0.786832	0.799697	0.810519	0.809853	0.724483	0.832643
cg09230763	MAP3K6	ACCCCAGACCCCAAAGTGCGGGGGTAGGGTGCCCGGCTCTGGGCAGGCCCCAGGCGGTGC[CG]GTATGGGAGATGTCCATTTAGTCACGCCCCCACCGGCGCCTGCCTGCCCCTGTCCCGCCT	0.504379	0.635278	0.561719	0.401674	0.527136	0.782237	0.935423	0.916189	0.866839	0.827378	0.616291	0.574705	0.41887	0.547526	0.896781	0.891978	0.863216	0.880192	0.881832	0.899286	0.869138	0.917517	0.90402	0.921516
cg27173148	LOC100130872	TACAACACTAACAGCCCGCCGCCCGCGAGCACAGCCCGTCTGGTCATCCGGCGGCCTCAC[CG]TTCACCACGGTTGGCGGCCCTGGTCACTCCCACGGTCTTTACCAGCCGGGTGCCAGTGGC	0.555054	0.704938	0.589728	0.480359	0.612077	0.789237	0.896602	0.794802	0.977691	0.930883	0.698434	0.604112	0.47175	0.616561	0.930024	0.969652	0.963704	0.972084	0.97069	0.96712	0.950219	0.964159	0.949142	0.976477
cg12153794		GCATGTCTCCATCTAGAATTTGAGAATTGTTGGAGTCAGTGAAAGACCTTTTGACTTCGA[CG]TATGATTTTTTTTTAAGGGAGTGGAGCAGACTTCTGTAAAACAGGGATATTGCAGTTGAA	0.502965	0.725208	0.646706	0.590364	0.673307	0.842903	0.878032	0.827847	0.896053	0.730422	0.723025	0.657016	0.608094	0.651058	0.881021	0.179222	0.196603	0.194398	0.195795	0.188992	0.182134	0.255778	0.214257	0.239463
cg07088414		CCTCTGTTTTTCTGTTCTATTGGGGCCCTCAGTGGATTGGATAATATCCACCCCTGTTGG[CG]AGGGTGATCTTGTTTACTCAGTCCACTAATACTAATGCTAATCTCTTCCAAAAACATCCT	0.481805	0.500612	0.448221	0.516377	0.414098	0.603943	0.737588	0.815641	0.691852	0.858062	0.517589	0.496959	0.543956	0.476919	0.785376	0.796042	0.807623	0.783004	0.796512	0.817633	0.765914	0.790505	0.677264	0.784988
cg23009044	PIK3R6	GCAGCGAGCAGTAAATCTCCTCCAGCCTCTCTACGTGTCCCTCCCGGCTCGGGCTGGCCT[CG]CTGGCCATCTGCTCCAAGGCGGCCACCACGGCGTGGAAATAGTGCTCCAGGGTGCGGCGA	0.199851	0.30317	0.308446	0.269251	0.231387	0.521504	0.673767	0.783382	0.491223	0.745717	0.283245	0.342652	0.276915	0.271958	0.347005	0.462017	0.415452	0.500504	0.527216	0.543435	0.51563	0.557028	0.706752	0.777903
cg00516678	AQP1	TGGGAGCTCCCAGGGCGGGGGCTTTCTAACAGCTCTGCCTAGCTCGGGCCTGCCCTCAAC[CG]CAGCATGCAGGGCAGCCACAGACAACCTCTCTGCAACTTCTGATGCCTCCGTGCCCCCAT	0.490594	0.568747	0.444267	0.391116	0.474102	0.835031	0.648022	0.703842	0.813915	0.780819	0.568609	0.457433	0.419028	0.528487	0.772572	0.788843	0.806956	0.788738	0.813164	0.794716	0.789828	0.790179	0.752615	0.796799
cg10204884	PCBP3	CCCCGGGGCACTTACAGTCAGCCCATCTCTGTCCTGGTCAGGTGGGCGCCAAGGAAGACC[CG]GCTCAGGGCCTCTGTATGGGCAGCCTGGCTTGTACACACACCCCTCCCCACCAGCAGATT	0.520832	0.514894	0.58932	0.633188	0.521274	0.801989	0.816616	0.687083	0.83615	0.84628	0.543919	0.606386	0.631992	0.53033	0.599612	0.841797	0.815941	0.824967	0.816807	0.820837	0.825841	0.827047	0.781691	0.821364
cg03566191	PIGH	TGAGCCTGGGAGGTCGAGGTTGCAGTGAGCGGAGATCATGCCCCTGCTCTCTAGCCTGTG[CG]AGAGAGCAAGACCCTGTCTCAAAACAAACCCACAGTTTGTTTTTGTTTTGAGACGGAATG	0.540564	0.541972	0.548362	0.563536	0.646152	0.829266	0.737977	0.810763	0.817191	0.38128	0.540899	0.559083	0.536922	0.553893	0.526479	0.792575	0.794332	0.77932	0.783328	0.793146	0.785474	0.777088	0.764832	0.780335
cg05196487	KIF13B	GCCGCTGCCTCCCGGCCCCTCCCTCTCCTGCCCGGACCCTGTCCCCTCCCAGGCCGGCCA[CG]TTCCTGCTTCCCCAGACCCCCGGCACCACCCTGGAGCCCGGAGTGCCCGGTACCCACCTG	0.326344	0.412646	0.457769	0.263849	0.299362	0.569049	0.747137	0.720307	0.587326	0.530223	0.426131	0.475618	0.277435	0.365676	0.417231	0.730212	0.719869	0.7549	0.759881	0.751112	0.718568	0.741676	0.694615	0.74249
cg00050294		CCTTCTAATGAAAGTAACACACAGCACAGGAGGGCGGCCCTGGGCGCGGGGCTGCGTCCC[CG]AGAAATGCTTGTTACTGTGGAATGAGGGACAGAGCAAATCCCCTGAATCGGGCAGAGCTG	0.480429	0.562483	0.457004	0.37553	0.423324	0.656927	0.622184	0.776414	0.655648	0.417604	0.506235	0.478892	0.367496	0.49951	0.434477	0.817972	0.815543	0.821873	0.797987	0.817111	0.795401	0.802768	0.754795	0.82287
cg19213703		TTTTGAAGATTCTACATGTTTGGATTGCCACCAAAACAAAAAGTGCCAAAATAGCACTGT[CG]TACACAGCTTTGTTACCTAAGAGACTGAAATGTAGCTCAAGTGTCCAGCTTGTTTCTTTA	0.507211	0.613297	0.48788	0.423694	0.562853	0.882544	0.753579	0.811079	0.817234	0.594347	0.566402	0.449262	0.433977	0.632702	0.829238	0.85387	0.855483	0.851776	0.845333	0.886352	0.856267	0.863758	0.826973	0.87963
cg02794451	CACNA1C	CTTTTTTTTATTTGTTTCAATGTTCCTAATGGGTTCGTTTCAGAAGTGCCTCACTGTTCT[CG]TGACCTGGAGTTAACCGGAACAGCGTCTTCATTCATTTCTGTTGGGACCAGACGCGGAGC	0.437774	0.400307	0.352548	0.397201	0.374342	0.703724	0.87072	0.629851	0.542268	0.905612	0.408166	0.409979	0.405527	0.397659	0.900977	0.0746576	0.0956998	0.0861279	0.078693	0.0850401	0.0871093	0.0844334	0.204473	0.0762662
cg20304857	GALNT14	GGACATGGCAGCATTTCTGAGAAATAGAGAGGCACAGCAGGAAGAGGCTCAGCTGGCCTA[CG]CCCAGCTCTGAGAGTGACAGCGTGTTTACAAGAGCTATTAGGGACCACTGCTCCTCCGTG	0.452081	0.530747	0.446294	0.361885	0.445712	0.679144	0.62402	0.683902	0.753538	0.358231	0.578613	0.472618	0.352372	0.538863	0.530838	0.782325	0.767063	0.806009	0.766774	0.772337	0.76186	0.719509	0.712156	0.766451
cg25363445	ALX4	GGCGGTCGCGGCGAGGTTCCTGGCGCAGCCGCTTGGAACTTCGCATTAGAATCGGGACCG[CG]CAAATGCCCTGGCTGAAGTGTCACCCTATTCAAGAAACACTGCTGTCAGGAACAAAATGG	0.418933	0.61494	0.562028	0.43776	0.575464	0.886261	0.886378	0.891323	0.91447	0.543973	0.644843	0.562396	0.44251	0.546156	0.624608	0.12058	0.113613	0.097725	0.10559	0.117931	0.125652	0.122976	0.130467	0.130219
cg21872782	HOXB3	ACAACAACAGCCTGACCTAGAAACTTCCTGATGATTTTTAACCTCAAGAGCCAGCTGAAC[CG]AGACTCATCTGTCCATGGCCCTGCTGCAGGTACCACCACCTCCAGCCCTTGTCTTTGCTC	0.519258	0.531511	0.528182	0.415206	0.4805	0.812405	0.73469	0.708781	0.797855	0.519887	0.56983	0.524455	0.415197	0.485292	0.446805	0.271283	0.280915	0.28676	0.302316	0.295119	0.268007	0.284334	0.261667	0.258546
cg25164886		TGCACCCCCGCCAGCAGTGCCCTCGGCTGGACACACCTGCGTTGTGGGCAGCCGGCAGCG[CG]TGACCCACTGTGCACCTGCGCCTTGATGTAGGGGGGAGACCCTGCAGAGAGCGCTTCCTT	0.373898	0.494512	0.359997	0.368344	0.417424	0.661061	0.77649	0.799053	0.711072	0.819293	0.496539	0.411534	0.388606	0.384564	0.829308	0.14549	0.134086	0.114128	0.115882	0.148747	0.13964	0.136515	0.164333	0.112765
cg05398905	TBCD	AGGGCGGCACGTGGTGCCAGTTGGTGACCATGAGCTGCCTCACTCCTGAGGAAGAGTGTT[CG]GGCTCTGGGCTTTGATTTAACCTGCCTGTCTGTCTCTCTGAGTTGACAGCCGGGGCCTCC	0.528298	0.617979	0.540085	0.559016	0.592247	0.726412	0.812573	0.808615	0.799379	0.824026	0.623795	0.607693	0.608735	0.599632	0.836176	0.766862	0.753737	0.761856	0.76266	0.762904	0.741073	0.741041	0.736688	0.776527
cg07696033	ALX4	CCGGGACTTCGCCGAGATTTTCTGTAGGGCGTTTTAATCTGTTTTCCTACTGCGTGCCGG[CG]TCGCAGCGCGTGCGGCTCAGGGCTTGGTGACTCCGGCTTAGCCCGGCGGTCGCGGCGAGG	0.161021	0.26218	0.225648	0.1996	0.263692	0.817761	0.77261	0.550408	0.808311	0.226111	0.286293	0.244213	0.180068	0.224649	0.0611211	0.0288114	0.0175798	0.0299836	0.0218519	0.0323198	0.0334426	0.0225553	0.0220733	0.0276547
cg01385708		GAGGCCTCTGTGCCAGGCCGGCCCTGCAGCTGGACTGCCATGGCCATCTGTGTGAGTGTG[CG]TGTGTGTGCCGGGGCTCCCGGAGCCCGGTGTCACCCTCCCTGCTGGCGTTGGAGAAGGAA	0.541107	0.648466	0.543625	0.582511	0.630378	0.74642	0.823557	0.904896	0.748366	0.737962	0.640234	0.612197	0.597706	0.613199	0.719499	0.82643	0.816806	0.811215	0.833897	0.847163	0.824079	0.846297	0.795921	0.845365
cg24493649	EHMT2	CATGTGTTGACAGGGGGCAGGGAGCCGAGCTCGGGCAGCAGCTCAGGGTGTGGGTCCAGG[CG]GGCCAGACGGCTCTGCTCCAGGGCAATGGCTTCGGCTGAGTGCTTGCACTTCTCAGAGCC	0.530074	0.648177	0.572091	0.595061	0.635195	0.878562	0.783247	0.720315	0.819504	0.615672	0.674942	0.593005	0.601731	0.646355	0.677895	0.847089	0.828963	0.819271	0.81189	0.820713	0.812621	0.81879	0.810104	0.810929
cg23202388	CHID1	TGGGTTTGTGTCTTCCCCAGGCTGGCCAGTGCTCCTGGGTGGGGTCGCGGCGGCTCTGGG[CG]ACTCCTCATTTGCAGAGTCAGCACAGGCAGGGCCCTTCCCAACAGTGGCAGCCTCGTGAC	0.36427	0.462287	0.344467	0.22787	0.39283	0.508937	0.658749	0.704064	0.72185	0.703652	0.446084	0.351556	0.239223	0.403324	0.559423	0.75899	0.753242	0.77783	0.736806	0.79674	0.743863	0.754843	0.719317	0.778432
cg17986992	VSIG8	CCCCTCCGCCGACCCCGCCGCCGTTGCCGTAGCCGAAGGCACCGCGGGCGCCGCCAGCCC[CG]GAGCCCCCGCAGCAGCAGCAGACGAGCCCCCAGATGCCTACGGCCAGGCAGCCCAGCGCG	0.580527	0.54683	0.674652	0.661959	0.677333	NA	0.862992	0.898182	0.912916	0.704179	0.561716	0.640417	0.66717	0.600989	0.894786	0.923455	0.903478	0.951136	0.934069	0.91549	0.888283	0.921698	0.881591	0.934288
cg18574003	KRT33B	GTAAGAATGGATGGTGTCTTACAATCAAACTTAAAGCACAGGGCTGCGCACAGTGGCTCA[CG]CCTGTAATCCCAGCAGTTTGGGAGGCTGAGGCGGGTGGATCACTTGAGGTCAGGAGTTCA	0.515558	0.571946	0.451866	0.467131	0.517354	0.749125	0.752101	0.648474	0.725579	0.654028	0.59684	0.497671	0.45238	0.52569	0.804679	0.765034	0.774553	0.777897	0.750241	0.750683	0.745351	0.728612	0.730931	0.798892
cg11834730	NCOR2	TTCTAGGATTCTTGTGTTTCACAATCATGTGATTATTTCTGGGCTGCCCCGGGGCCTCCC[CG]CCTCCTCCCCACTCACAACTGGGGACTTATTAGGAAAACAGGAACATGTGGCGCAGGGCT	0.44346	0.604924	0.467674	0.48903	0.553818	0.758882	0.736692	0.74289	0.769327	0.783887	0.570499	0.512628	0.491129	0.603553	0.675078	0.817784	0.804834	0.819032	0.815597	0.789697	0.799319	0.830236	0.790677	0.824172
cg26824780	CBFA2T3	GTACCTCTCCCGGCGTCGGAGACGGGGAACGCTCCACGGCCCTCGTGGGTGTTACAGGGA[CG]CGACAGTGCGTGTAAGCCCCAGCGCTGTTGTAGGCTCTAAGACCCACCCAGGAAGGCTCC	0.52364	0.503108	0.564898	0.500841	0.475522	0.731804	0.755104	0.78293	0.671804	0.738467	0.549203	0.582974	0.482911	0.48363	0.778056	0.753975	0.737725	0.757021	0.761483	0.76466	0.757489	0.773975	0.676886	0.74287
cg03339817	SFT2D3	TCTGAGAAACAGCAGGGCACGTGGGTGCGGCCTGGGAACAGATCAGGATTGACCTGCGTG[CG]AGCCAGCTTGTCACAGTGATGTGACGATGAGTCAGGACACCTGGGCGTGGCGCTGTCCAG	0.610381	0.675399	0.612954	0.58169	0.607802	0.952219	0.949613	0.913169	0.912005	0.948129	0.676878	0.596784	0.571977	0.656416	0.935117	0.38962	0.320353	0.236505	0.231907	0.25668	0.258688	0.406042	0.246331	0.311266
cg25117091	RBM47	GTCAGCTCCTTTTGCTTTCACAACATTTCTCGTCTTGCCCTCTATCACAGTGAGCTGACC[CG]CCTCCTAACGCCTCATCCGGGCCTCCCTTTTTCTCTTTTTTCCCTCTCTTCCTCTCTCCT	0.549172	0.557238	0.570983	0.560186	0.530498	0.840553	0.633516	0.806022	0.839512	0.443714	0.566651	0.58153	0.581812	0.546016	0.793979	0.648856	0.665284	0.692956	0.693918	0.657953	0.645604	0.68192	0.635276	0.670176
cg11645465		AATTTGACTGCTGACTGCATTTATCCACTTTGGGAAATCTCTAGTAATAAAAGGGAGACA[CG]CTGAGTAATAAGTGTGAAGTTTAGAACACAAACCTTGCAAGAGCTTTCAAGAATAAATAA	0.47381	0.611665	0.501284	0.417279	0.504555	0.864244	0.845441	0.840236	0.845452	0.633081	0.614578	0.524878	0.427911	0.492611	0.808793	0.827975	0.855463	0.853126	0.838375	0.8394	0.801267	0.845434	0.799829	0.825393
cg14074652	VAV2	TACTAACCAGATGGAGCCTGGAAACTCCAGCTGGGAACAGGAGGGGCTGGGAGGGGCTCA[CG]TGAGAAACACTAGATGTTGACAGAGACTTGCCCTGGGCCTGGGGTGAGGATGGATGAGGG	0.554435	0.561609	0.515018	0.555363	0.527287	0.809412	0.685486	0.764827	0.790175	0.522517	0.547162	0.526118	0.549063	0.518794	0.801097	0.719962	0.673712	0.701884	0.695142	0.719748	0.696731	0.712469	0.649219	0.7066
cg10389262		CAAGAGGCCGGGAGCGCCAGAGACCGGGCTTGACTTGGCTGGCTGCTCGCGTCCAGCGAA[CG]GAAGAATTCTAAAAACAGTGAGATAGACCGGACACAGTGGCTTACGCCTGTAATCCCAGA	0.635756	0.663442	0.7561	0.624529	0.62641	0.91251	0.868289	0.904512	0.896263	0.921674	0.702695	0.781066	0.625568	0.644433	0.94353	0.930329	0.913594	0.916667	0.920709	0.910587	0.90676	0.922714	0.893628	0.919958
cg20277282	SH3TC1	AGCGAGGACCAGGAGGGCGTGATTGCCAACATGGTGGCCGTGGCTCTGAAGAGGACGGGC[CG]GACGAGGCAGGCAGCTGAGAGCTACTACCGCGCCCTGCGGGTGGCTCGGGACCTGGGCCA	0.47663	0.681159	0.526229	0.483572	0.625085	0.802703	0.950779	0.877298	0.895466	0.936581	0.622659	0.529592	0.501643	0.631668	0.942072	0.965965	0.956352	0.966379	0.952828	0.957171	0.955399	0.958387	0.949188	0.965679
cg22685901	SASH1	GCCCTGAGCTATTAAACCTTGGCGTTCTTGTGAAATGTGCCATTCTGTTCACTAACACCA[CG]ACATGTGGTAGGCCAGGGTTTTCAAAGCATGTCACTTCTCCCTGTGACATGTGTAGACTT	0.593854	0.625615	0.63627	0.464312	0.502047	0.844111	0.85434	0.879924	0.864142	0.681656	0.619728	0.60394	0.526195	0.645112	0.833692	0.261733	0.226291	0.220297	0.196066	0.217667	0.232166	0.23238	0.212645	0.227429
cg05896714	MIR1180	TGGGCCAGGCGGGAGGCCAGGAGGCCGGGGGTGTCAGGCCCCGCCGCCGACACACCCACG[CG]AGCCGGAAACAACCAGGAGCACTATTCCCGGCCGGGTGGGTCCAGCAGCCGCGGGCTTCG	0.579476	0.676383	0.543785	0.456943	0.553969	0.790907	0.898069	0.906242	0.937544	0.947199	0.596511	0.601608	0.48043	0.564198	0.947288	0.930644	0.9125	0.922068	0.911735	0.920284	0.907726	0.916143	0.897952	0.916384
cg16395205	CREBBP	CTCCTCCTGCCCAGCTCTGAGGAGAAAGTCCCTACTATGGAGTCTGACGTGAACGTGGAA[CG]TTCTAGGGCTAACCAATTAAGCTCTGGCCAGAGCCTGTCCGGTGCCTCAGGAGCTGGCAA	0.645198	0.619332	0.656595	0.676604	0.570149	0.903139	0.800331	0.894818	0.860294	0.577422	0.6694	0.670064	0.680354	0.583233	0.915948	0.821438	0.854096	0.848407	0.836594	0.849139	0.811118	0.839867	0.809136	0.869762
cg20886011	GRB14	ACACTGCCTCCAGAAGAAAGCAGCAGCTCCCCTCCCCCATCTCAGTGCATTCTCTCCCAC[CG]AGGCACCGACCACTGGAGAACCCAGGGGTCACTAATTCCCAACCTGTGAGGAAACCTGGG	0.484676	0.488842	0.567764	0.539006	0.527873	0.854764	0.855595	0.834931	0.862607	0.681722	0.550126	0.543915	0.556872	0.506064	0.268409	0.267401	0.2353	0.227761	0.27455	0.271351	0.256819	0.250031	0.346635	0.235517
cg06904956		ATAAAAATAGGATGGATTGAAGCAGGGATGAATAGTTGGATATATGTGAATATACAAGTA[CG]GAACAGGAAATTGGTAATGGTAAAATCTAGGTGGTGGGTATGTGGTGTTCACTGTAAAAT	0.41175	0.596939	0.438369	0.424639	0.49794	0.860906	0.817046	0.68825	0.705631	0.84475	0.591919	0.482658	0.447486	0.548632	0.743354	0.821213	0.813046	0.822565	0.835105	0.84766	0.824955	0.819357	0.795347	0.819298
cg17500202	KIF1A	ACAGAGAGAGGCTGAGGCCCGGAGCGAAGCTGGCGCGGGCTGTGGGGGCGGAAGAGCAGG[CG]GCCCGGCTGCCTCGCCCTGGCCATGACTCAGGCTCTACCACCCCGTGGTCTCCTAGACAG	0.417322	0.568775	0.434338	0.345551	0.468708	0.748854	0.64957	0.73118	0.781337	0.748203	0.534461	0.413092	0.340789	0.464599	0.743197	0.824383	0.829994	0.83317	0.821642	0.842969	0.831687	0.833698	0.78583	0.815893
cg07851675		CATTTCAATAAAACCTAAGCGACTCCTGATCCTTTCTCATTGTGGTTCCTTATGAGCTTT[CG]GTGTCTGGCGGGGAAACAGTTACCGTTCGGGGGTGTGGCAAACTTTTTTGGCAATTAAGA	0.260147	0.3271	0.32419	0.414747	0.340017	0.905063	NA	0.6624	0.612167	0.445757	0.30925	0.343428	0.398707	0.315855	0.174579	0.0689901	0.0703782	0.335021	0.0749268	0.0693508	0.071425	0.100212	0.0699481	0.0870367
cg02171804		CTGGGGCAGGGCACCCAGCCCACACCACATGGATGGGGATGAACCTCCAGCTGGGCTGCC[CG]ACAGGGACAGAGGCAAACAGGGCTCCCAGGATTCCGGGGCCAGCACAACTCTGTGGCTGC	0.420114	0.510522	0.399807	0.362815	0.436819	0.670629	0.769838	0.579716	0.793702	0.828971	0.528728	0.452549	0.39067	0.507597	0.775318	0.668403	0.654652	0.62617	0.660698	0.667055	0.651392	0.66779	0.658873	0.694147
cg01294808	IRX1	GAACAAGGTGACATGGGGAGCGCGCAGCAAGGACCAGGAAGATGGAGCGCTCTTCGGCAG[CG]ACACCGAGGGCGACCCGGAGAAGGCCGAGGACGACGAGGAGATCGACCTGGAAAGCATCG	0.676779	0.604847	0.704803	0.672062	0.623357	0.920075	0.832942	0.804087	0.935894	0.35148	0.612822	0.700923	0.65497	0.538321	0.686781	0.083141	0.0739341	0.676904	0.0646471	0.0604415	0.0868187	0.120087	0.3382	0.0609995
cg14187242	TNFSF8	CAGAGTGAATTGGCAGATGAAATGCTCATTAAAATGAAGCTCATGACATTATTTGATGGA[CG]GGAGCTTCTCAATTAAGTACCTAAGTGTTTAAGGCTATCTGATGCTTCCAGGAATGTGTG	0.217107	0.444666	0.346028	0.249827	0.314937	0.63091	0.635234	0.50084	0.655409	0.683868	0.437928	0.356856	0.250587	0.38679	0.850366	0.792014	0.801481	0.825098	0.774236	0.767813	0.817994	0.725403	0.704693	0.830945
cg25361850	ZNF577	CATCTACATCAGATGTAGCCTCAGAGGAAGGAGTCAGTCATAGAATGGATAAAACAACCG[CG]TGTTAAAGCTTTGGTTATAATTGGTGTGGAGAATGGAGAACACAGTTGATCAGCAGTTGA	0.394193	0.41499	0.439729	0.41251	0.374918	0.609289	0.582431	0.681976	0.634942	0.351318	0.384486	0.431593	0.418031	0.349963	0.570086	0.4414	0.420677	0.486877	0.453688	0.434151	0.405277	0.683691	0.682103	0.861446
cg12004276	LMO2	AAGCCCACTTAACGGCTGAGGGCAGGTGGGGGTATTTCCTTCTCAATTCTGCTCAAGGCC[CG]TTGCTGTTCTTTGAGGATGTTGCAAATCCAGGGTTTGGAGGGCTGGGCCTCTTGGTGGCC	0.582576	0.618879	0.576525	0.585351	0.615681	0.805103	0.723233	0.841132	0.829666	0.620398	0.617089	0.572668	0.582138	0.603855	0.830415	0.78725	0.774455	0.77895	0.798145	0.815721	0.780507	0.78445	0.70661	0.761018
cg06748792	VEZF1	AATTATGTGGTTACTTATGAGTCTCTTTCTGGACTTAACTGCTCCTAGCAAATTACAGTC[CG]CTTTTAATCTAATTTGTGAAGCTCCTGTAAATGTAAGGGTCTATCTACCCAGGTGACATC	0.45452	0.630737	0.530032	0.424999	0.53439	0.878795	0.811546	0.821371	0.865861	0.701444	0.651161	0.50659	0.442041	0.596429	0.893505	0.864296	0.873865	0.884793	0.86027	0.86994	0.865585	0.878127	0.850076	0.874911
cg03759001		CTCATCTGTGAAATGGGGATGACGTGTCATCTAGGGCGGTGTTGAGCTGCAATTGGAAGA[CG]TGTATGCAGTGCCTGGGGTGTAGCGGTGTGCCATGGATGAGGGTTTGTATCAGATCACCT	0.223703	0.460087	0.27826	0.0778999	0.218363	0.502289	0.717378	0.697566	0.812731	0.453236	0.454076	0.22925	0.12721	0.348671	0.356808	0.909937	0.859661	0.805614	0.897898	0.880876	0.87813	0.903246	0.827632	0.84783
cg21237133		AACCCCCGCCTCCCCCCATCACACGCCACCATGACTACACGATGCAGGGACCCCCGACGA[CG]TCCCAGGCATTCCTACAGTGGTCGCCTCCACAAGCTGAGTCCCTGACCTCAGACCCTTCC	0.644373	0.596593	0.619185	0.628752	0.517175	0.867173	0.839303	0.886578	0.843743	0.613936	0.582089	0.637418	0.618544	0.558365	0.867143	0.78608	0.824376	0.809958	0.790253	0.833672	0.819691	0.817114	0.817848	0.855041
cg18220920		TATGAACTTTTCCTGGGGGAGGGGCGTTCTGGTCATCCTGGCAGTTTGGCAATGGCTCCT[CG]TTTCTGCCCAGTGCCCCAGCCCATTTGATCTCAGGATCCCAGCCTCTTTTGATATTGACG	0.441085	0.613047	0.472714	0.454408	0.455817	0.855005	0.894798	0.826756	0.893004	0.365099	0.574462	0.506252	0.459801	0.468447	0.590189	0.120391	0.125576	0.132135	0.140654	0.126731	0.134946	0.174037	0.173808	0.186809
cg23999932		GCAGGGATGGCTGGTGGTGTGCACTGGAGAGCACGACGGTGACGCTGCGTGGGAAAGAGA[CG]TGGGAAGGGCATAGCCGGATTATCCACTCAGCTCCAATTTTCTCCAAGCGCCACTCACCC	0.307417	0.353437	0.311064	0.405616	0.286822	0.611802	0.703456	0.63488	0.58957	0.382292	0.350675	0.350234	0.376133	0.30668	0.540013	0.101754	0.107274	0.097993	0.0985294	0.112485	0.109851	0.10404	0.140419	0.10196
cg02918557	RADIL	CTCTTCGAAGACCCCGAAGGGCCTGAGGGTTTCTATTAGCCTCTGGGTGAGGAGGCAGTC[CG]TCTCCTTGGGGACCGCTAGACTGATAGGCGAGGAGACGCCGTAGCGATTCGGCGGCGGCG	0.581826	0.616322	0.721049	0.592798	0.615304	0.807535	0.802069	0.887672	0.864191	0.380231	0.654033	0.724518	0.591985	0.59897	0.836286	0.615074	0.477791	0.700174	0.777895	0.585604	0.546025	0.900739	0.856436	0.870755
cg01484716		AGTGGGTGTTAATCCTCCTGCACTCCCTGAATGTACATATGCAGACATACCCAGCATCAA[CG]GGAAAGCTGCGGGACAGGATGTCAGAGGTGTGCATGAAGTGAGGTGCTATTGGCATGCAC	0.325368	0.443462	0.500764	0.43358	0.376525	0.817285	0.806657	0.567161	0.653998	0.566011	0.50186	0.496314	0.48429	0.408066	0.600708	0.77549	0.802408	0.776386	0.803568	0.77521	0.767717	0.692477	0.718606	0.758183
cg08241465	CNGB1	CTAGCTGGAGATCCCCCAGGAGAACACAAACATGATAATTCACCAGACGCCTCTGACACG[CG]CCAGCTCGGCACTGTCCCCCATGTTATTTGAGTCCATAATTCATGATGTGACAGCCCACA	0.474504	0.636288	0.45167	0.412902	0.482273	0.666128	0.775875	0.863643	0.890411	0.87705	0.610173	0.490726	0.426026	0.510847	0.872689	0.886723	0.854527	0.857177	0.867658	0.860241	0.85856	0.875822	0.864552	0.845696
cg20000805		TTGACTTGCAAACAGGGCCCAGGAATCCAGCAGAGCTATCTGGAGAACCACCTGAATCAT[CG]ATCCATAAAACCATCATGAAAGTCAATGTCTCTTCCAGCACAGATCAGAGTCAGGCTTAG	0.555645	0.66894	0.644169	0.675405	0.724526	0.848221	0.82113	0.854193	0.892727	0.86301	0.68963	0.653481	0.711851	0.671365	0.893165	0.274864	0.280139	0.241945	0.262919	0.309215	0.264342	0.403348	0.361457	0.351253
cg24100293	FLJ22536	GGCTCTTGTAAGCTTTAAATAGGTTATTATACATAAAGAGCTAATAGTGATGCCTGTAGC[CG]TTGTCTAAGTGCTAGCTCTGATGATGGTGACAAAGAAGTAATAGCAATCAGTGGTTTAGA	0.22109	0.237064	0.306554	0.162682	0.283701	0.527237	0.431459	0.487599	0.497801	0.506049	0.274327	0.294426	0.147612	0.361394	0.456978	0.869399	0.823295	0.500235	0.486678	0.823929	0.837607	0.479993	0.491712	0.489316
cg06105699	ASPSCR1	GTCAGAGAGCTGGCGGGGCTGAGGGAAGGAAGCCTGCCTCCCTGGCAGGCAAGCAGGCGG[CG]GGCGCGGAAGCACCAGCTTTCACGTCTCTGGCAGAGCCCCACTCCGGCTGCCTGCTGCCT	0.404078	0.653859	0.480719	0.467108	0.462992	0.883315	0.868412	0.915061	0.691158	0.743707	0.66166	0.516266	0.518433	0.57345	0.789519	0.923833	0.890347	0.910347	0.910252	0.912368	0.894556	0.901261	0.889806	0.908135
cg13580107	NFATC1	TGAAACCCTCGCCCTCCTGAAGCTGCTCCTGTGGAGTCCTGTGGGCGGGTGTGGCCCTGC[CG]AGTTCAGAGTCTGTCGCTTCGTCTGTCTGGAAACTGCAGGAGTCATGAGCAGCCTTCACG	0.412979	0.512258	0.487652	0.441739	0.502248	0.851819	0.851731	0.777501	0.650548	0.598683	0.523453	0.489341	0.439977	0.511503	0.464808	0.787247	0.788393	0.828148	0.787613	0.795499	0.789259	0.712108	0.666296	0.772361
cg20058506		CGCTTGCCTGCGCGGCCGCGGGGAGGAGGCTTCTTGGCTGTAAATCAGGGCCGCCCCCAG[CG]CCTGCCGGCCCTTCATCACAGTGCTTTACGGTGCTGACACCGGCCAGGATTTAGTGGGTC	0.492385	0.591127	0.542166	0.405667	0.461048	0.815962	0.86158	0.822121	0.826442	0.840743	0.616623	0.547987	0.435782	0.524999	0.87163	0.818497	0.827357	0.821078	0.821071	0.827053	0.800668	0.823701	0.790679	0.82457
cg07569385	GJB2	TGAGCGCTGTTCGGGCTGCCTTCCTCCTCCAGTGGGGCAGGATCGAGGCACTGATGGAAC[CG]TCCTGAGGACGCGGGTCTCAGCCGCACACCACCTCTTCGCGAACAAGGGTCCTAAAAATT	0.345409	0.400794	0.382757	0.276443	0.370284	0.592492	0.614644	0.569468	0.825637	0.532497	0.401266	0.422061	0.261863	0.36031	0.585075	0.140378	0.147108	0.158429	0.163461	0.181336	0.157254	0.155746	0.136512	0.128851
cg01257309	DLEU7	ACAAATAGTTGCTGTTTTTAATTAAACCCAACATGGCTACTTCCTTAACTTAGAAAAAAG[CG]ACTAGCAATGTTATGCTTTGATAGATTGGAAACCATGGGTGTGTGATCACACTTAAGAAA	0.522523	0.659393	0.571706	0.626474	0.547681	0.905884	0.882388	0.883432	0.790796	0.751205	0.702392	0.607077	0.63151	0.709444	0.561881	0.855824	0.838002	0.831578	0.8347	0.842274	0.832418	0.859555	0.813356	0.848323
cg00759741		CCTACTGTCCCCACCATGCAGGGCTGGGTACCGCTGCCATCGCCCGTCCCAGGTCATTGG[CG]TGTGGCCAGAGCCCGTCCCCATCGCACCCAGGACTCGCCTCGGGCACGCGTCTTCTGCAC	0.607557	0.625518	0.722513	0.676395	0.6674	0.876187	0.849552	0.872615	0.904919	0.881573	0.661444	0.760397	0.714299	0.66996	0.913351	0.878123	0.859275	0.902289	0.905272	0.90435	0.887943	0.90847	0.843201	0.896351
cg04243822	C1QTNF1	GGGGCTTGTCCAGGCCCCAGACAACCAAATACGTTTGTGCTGCTTGTAAAGGGCTGGGTG[CG]ACGGGGCACCAGGCCATAGAATTCCCAGGTTCTTTCCTCCCTCTGTTTTGGGAGCGGTCG	0.388971	0.537716	0.46378	0.346426	0.510171	0.724108	0.723919	0.707118	0.897987	0.834962	0.5278	0.443547	0.366976	0.532008	0.71521	0.838391	0.831276	0.863816	0.873375	0.852816	0.839978	0.777032	0.804402	0.832034
cg14357089	CACNB2	CCCCCCACCCCCAAAAAAAGACAAACAGGGGAGAACAAAGTTTTGGCATGCCTGCAGGAA[CG]GTGGCTTTTTTAGAAACTACCTAGGAGGCAGAAGCTAAGTGATTTGCTCATGCCTCTTAC	0.408888	0.421913	0.364049	0.40084	0.414104	0.660913	0.74284	0.802763	0.51846	0.85742	0.430565	0.398137	0.394831	0.387834	0.857732	0.457759	0.500574	0.507854	0.467789	0.478153	0.461683	0.548621	0.502467	0.549318
cg21161126	LPAR1	ACTTACAAAAAGAATGATCTTAGACAAGTTACTTAACCTATCCTAATTCAGTTCCCTCAA[CG]TAAAATGAGGAAAATGTAACTCCTTGATGTAAGAGTATAAACAACACAGGAAGAGTAGGG	0.403202	0.559891	0.516136	0.394938	0.419718	0.863451	0.851896	0.856465	0.872364	0.846064	0.524456	0.510653	0.386402	0.430768	0.85726	0.802964	0.808417	0.811994	0.804146	0.803483	0.780407	0.796485	0.759542	0.798971
cg02922817	KIF26A	TGAGCTAATGAGTTGGAAATGCCAGGGTAGTATTTCAGATGAGGGAGCGCCACACATCAC[CG]TACGTGGGGCAATTAGTGTTCCTGCCAAATAGTTATCGTGGTTTCTTCTCTAATTACGCC	0.425206	0.565385	0.405699	0.30146	0.486097	0.659802	0.692243	0.829538	0.817909	0.678809	0.523423	0.418875	0.328918	0.50119	0.858027	0.875541	0.859834	0.870424	0.861674	0.865825	0.850871	0.880631	0.832301	0.875413
cg06747907	FBLIM1	CAGGTGAGGGAGGTCACTTGGGGTGTGGCCCAGCAGGCAGGCGGGACTCCAGACTGGGAA[CG]GAAGTCAGCCCTGCTGGGGCTGGGAGCTGAAGCATCTGTTCCTTCCTCGCGGGTGTGAGA	0.443661	0.597619	0.486765	0.42335	0.488809	0.84945	0.736816	0.711128	0.644442	0.850929	0.589569	0.512746	0.443871	0.56198	0.761222	0.793195	0.787272	0.827458	0.80537	0.781422	0.796619	0.814801	0.755894	0.810121
cg08695452	MMP15	TGGCTTTCTGGCCCACGCCTATTTCCCTGGCCCCGGCCTAGGCGGGGACACCCATTTTGA[CG]CAGATGAGCCCTGGACCTTCTCCAGCACTGACCTGCATGGTGAGGACAGCTGGCCAGGGT	0.497352	0.635611	0.573848	0.522718	0.526757	0.812738	0.763797	0.822603	0.787345	0.452475	0.612524	0.604248	0.547695	0.55675	0.503216	0.801763	0.809567	0.793232	0.806135	0.813787	0.798965	0.828792	0.769204	0.818971
cg19175386		TCCCGGATCTGCTCACCCCAGCTCCCAGCTCAAAGGCCCTAACTTCTAAACTCTCCGGTC[CG]TTTCTTGCACTCAGAGCACACACCTTGCCTACAAGTGGGTAGTACTGCCGCTCTGCACAA	0.469371	0.713535	0.557938	0.565852	0.552402	0.89526	0.83841	0.833459	0.798139	0.689241	0.684257	0.547361	0.584933	0.532711	0.858312	0.16312	0.19381	0.255992	0.181117	0.150561	0.132165	0.194158	0.193658	0.195759
cg12560421		GCCCTCTGGTTTTTGGTGCTCCCAGACGTGCGCTGAGTGCATGAGGGCCTCCTCAAAGAC[CG]AGTGAGGGTCACCACAAGCTCTTGCCAAGACAGTTTTAAATATGAGATTCCTCCAAGGTC	0.446007	0.498136	0.357949	0.33735	0.407214	0.526555	0.806832	0.739433	0.840174	0.874554	0.439946	0.40158	0.357846	0.446258	0.838573	0.73284	0.744747	0.759486	0.740189	0.755491	0.737894	0.733747	0.668281	0.743146
cg27068206	SHANK2	CCACTTGTTCCCAGCTCCCTGGAAGATCGTGGTTCCTCCCATGTGCGCACATGTGTATGG[CG]TGTGTCATCCGCCCTGCTCCTCTTTGCTCGATGCTGGGAAGAACAGCCTCGTGTCACACG	0.671644	0.582247	0.560532	0.549198	0.574597	0.854343	0.805069	0.812746	0.845671	0.83415	0.587096	0.572752	0.504906	0.557792	0.848281	0.862027	0.830259	0.867965	0.846799	0.834643	0.814345	0.859794	0.78462	0.841915
cg02803847	BUB3	CTGAACAGTTTGAGCTCTTTTTGTAATATACTCTAAACCTGTTATTTCTGTGCTAATAAA[CG]AGATGCAGAACCCTTGAATGTTGGATGTTTTTGAATGTTGGTAATTAATATAATTTACTT	0.706742	0.683785	0.643559	0.631892	0.668155	0.863217	0.842377	0.894085	0.880998	0.866385	0.669666	0.642586	0.627776	0.685566	0.854871	0.821705	0.81381	0.830956	0.791508	0.815784	0.798187	0.813936	0.795168	0.802587
cg05824218	RARA	GTTTGCTCCCAGAGAAGGGGCTCCCCGCCCCGGGTCCGTACTCCACCCCGCTCCGGACTC[CG]CTTTGGAATGGCTCAAACCACTGTACGTACCGGCCTCTCAGTCTGCTGTTGTAGGGGGTG	0.56143	0.609021	0.479999	0.432573	0.584422	0.773345	0.759693	0.802277	0.69787	0.791552	0.540186	0.523053	0.433364	0.544733	0.633348	0.203369	0.199481	0.183471	0.229841	0.229271	0.215704	0.236216	0.186015	0.194521
cg23365135		GGGCCGCAGAAGGGCACTGTCAGGAGGCGGGATCCCTGTACCCTGATGACTCCCGGGAAG[CG]GCAGAAATCACGGTCATGAAGGATTCGTAACCGGGGCAGGGCTCTTCTCAGAGCGGGAGA	0.57808	0.531644	0.639592	0.577904	0.486739	0.824548	0.737663	0.844157	0.778272	0.394198	0.533983	0.63859	0.532932	0.487793	0.777347	0.810785	0.804047	0.816943	0.813745	0.819998	0.821766	0.821797	0.793015	0.826067
cg02618319	USP2	AGGCCACAGAATGCACTATGGGCAGGAGAGCGGGCTGGGGCCCTGGCCGGAGTCTCGCTG[CG]CAAGACAGGGACAGGACGGGCACTCACGTGGCTGCGAGTCTCCCTGTTGCCACAGGAACA	0.628626	0.712722	0.664131	0.7348	0.65925	0.957675	0.83588	0.944989	0.956384	0.953202	0.705886	0.700465	0.728966	0.717902	0.952532	0.855759	0.871117	0.885129	0.875194	0.867538	0.857003	0.860291	0.864176	0.881696
cg08420135		CAGGGTGACTGGGTCTTGGTTGCAGGCACCTGGCAGGGCCTTGCAAAGGGACAGTGTACA[CG]GCTAGTGAGATGCAGAGTACCATTCCTGGGTAAGCAGAAAGCAGTTTTACAAGGCAATCA	0.640618	0.545311	0.629747	0.610445	0.601696	0.757603	0.855937	0.883198	0.835928	0.521761	0.546869	0.627884	0.593772	0.57157	0.546917	0.825355	0.844068	0.843305	0.834111	0.808276	0.812897	0.768493	0.769259	0.814248
cg24918184	FSD1	GCAGGTCAGCTTCACGGCCAAGCACGCCAACAAGGTCAAGGTGCTGGACGCCCCCGTGCC[CG]ACTGCCTGGGTGTGCACTGTGACTTCCACCAAGGTGACCCCAAGCCCCAGCTGCCGTCTC	0.649472	0.629723	0.663316	0.629899	0.596808	0.841278	0.850255	0.854389	0.843515	0.76069	0.633915	0.672793	0.636527	0.607778	0.553441	0.803659	0.792472	0.796845	0.808521	0.808157	0.799735	0.819051	0.75107	0.82074
cg26781392		GGAGAAATTATGTCAAAGCACTTCCCAAAGGCCAGGAAGTATTTGCTTTCCGAATGCAGG[CG]TCTTTGTATATCTGTGGCTAAAAGTGATGCTGAAGATATGCAGATTTGTAATTTCTAATT	0.6287	0.678785	0.614269	0.541666	0.588761	0.888555	0.774226	0.871181	0.769939	0.75544	0.704519	0.64715	0.549631	0.627486	0.866287	0.860043	0.832216	0.840881	0.846648	0.861507	0.844657	0.845003	0.812106	0.868575
cg22476027	NR2E1	CTCTCCCCTTTTCTCCCTCTTCTCCGCCCTCCTTTCCCTCTCGCCCCTTCCCCCCTTCCC[CG]TCTTTCCTGCGATTTCAGGCCGCATTTTAGATATCCCCTGCAAAGTGTGTGGCGACCGCA	0.347143	0.440392	0.388537	0.268845	0.372949	0.665777	0.610927	0.633708	0.479008	0.158468	0.502255	0.435861	0.252119	0.433464	0.162597	0.05457	0.0847036	0.092166	0.0715743	0.103711	0.0943717	0.0981439	0.104631	0.065537
cg01065697	PRDM16	CCGTGATATATCACTGCTTTGCTCATGAAGATTAACGGTCATCCCTGGGACAAGGGAAGC[CG]GGGGTCCCCCAAGAGCAGGGAATTAGAGCGACTCCTTCATCCAAGTGCAGCGGCCCCTCC	0.487902	0.638645	0.529037	0.487119	0.52925	0.728456	0.837813	0.896818	0.844298	0.639949	0.628662	0.561123	0.489823	0.529304	0.824918	0.839577	0.832406	0.843087	0.810159	0.843232	0.831807	0.822041	0.778878	0.846225
cg06678890	DOT1L	CTGCCTCTCCCGCCCACCAGCTCTCCTCCAGTCCCCGGCTTGGTGGGGCCGCCCAGGGCC[CG]TTGCCCGAGGCCAGCAAGGGAGACCTGCCCTCCGATTCCGGCTTCTCAGATCCTGAGAGT	0.660759	0.769147	0.762232	0.674259	0.732033	0.915228	0.889706	0.942443	0.934521	0.616055	0.78668	0.744546	0.676796	0.758372	0.891964	0.934659	0.943158	0.951146	0.946918	0.929464	0.938881	0.945531	0.919332	0.947098
cg08849095	MIR23B	AGAGCACATGTGGCACACACAGTGCACGCACCACACAGCACCCGCGGCGCACACAGCACA[CG]TGGCATATGGCCTCCATGACCCTGTGTCTTGAGGGCAGGTCCTACTTTTTGCTTTGTTGT	0.551263	0.522299	0.679231	0.629621	0.596385	0.840981	0.703354	0.879031	0.875903	0.602231	0.547669	0.691289	0.624154	0.540237	0.595414	0.88241	0.876114	0.902687	0.866714	0.875886	0.879754	0.876934	0.847771	0.863388
cg13595161	CTBP2	AATGTTTGACTGAGAGAGCAGGCACAGGCCCTCGGAAAAATTATCTGACGTCCCTCCTGC[CG]CACATGTATTTGAGAAAGTCAAATAATGATGTGATCAGACTTCAAAAAAATCCATGAGAC	0.40844	0.568154	0.430055	0.310926	0.432328	0.855271	0.730786	0.858737	0.61263	0.724574	0.530232	0.451218	0.312662	0.482267	0.51644	0.844817	0.856332	0.835561	0.827809	0.840036	0.823491	0.825075	0.798712	0.835546
cg23008718		ACCCTCTTCTTCCGCCCCAGACGTTATTTATGTGTGTGGCTTTGTGTTCGTTGCTAAATG[CG]GCCTGTGTGAAGGCTGTTAATTAACCCTTTGAGAAATGCGCTTCCCATCGGGGCAGGGAC	0.408533	0.373255	0.35299	0.35805	0.358561	0.548798	0.585731	0.73997	0.663097	0.426241	0.382763	0.42376	0.401879	0.333819	0.526717	0.451687	0.470212	0.438609	0.45515	0.428764	0.437851	0.493389	0.472773	0.470999
cg23779604		TGCAAAACGACCGACTCTATTGAAGACACACTGGGTGGCGCGGGAGGTTCCTGCCAATGC[CG]GGAGGAAGAGCAACCCAGGACGCCTGTGCCTGGGAGGGATGGAAAGGCCAGGGGAGGGTG	0.412586	0.545764	0.484173	0.424654	0.537035	0.815261	0.608761	0.739773	0.839936	0.548668	0.530994	0.479343	0.435803	0.505691	0.520024	0.77016	0.780969	0.789972	0.786785	0.785278	0.763935	0.7379	0.736566	0.75059
cg20676760	RBBP5	CAGGCATGTACTACCACGCCCAGCTAATTTTTGTCTTTTAATAGATACAGGCTTTCACCA[CG]TTGGCCAGGCTGGTCTTGAACTCCTGACCTCGGGTGATCAACCCGCCTTGGCCTCCCAAA	0.432685	0.51833	0.39593	0.309852	0.419708	0.663374	0.610539	0.639931	0.616384	0.671037	0.468951	0.378725	0.327346	0.456572	0.585283	0.723741	0.733728	0.714191	0.714902	0.733599	0.729754	0.767603	0.71574	0.732685
cg10805850	FARP1	CACGGTTCTGAGCCAGTGGCCTCCGAAGGCCGGAATCCGCTAGCCCCGGGTCTGGCAGAA[CG]TCACTTGCTGCGCCCTAGGCCTCTTCCCGCCACGCTTAGAGAGAGGGACTGGAGGCTCAG	0.269278	0.397924	0.359999	0.38862	0.264944	0.680712	0.9154	0.670765	0.568556	0.778483	0.360797	0.417293	0.427669	0.280083	0.876273	0.0682462	0.056239	0.0552784	0.0696782	0.0611389	0.0746841	0.0543223	0.0803844	0.0405151
cg24324837	CCDC155	CTCCCCCAACTCAACTGCCGTTCGTCGTTCGTGGATGTCCGTTGTGTCCCGAGACTAGGA[CG]TGGCTCCAGGTGCGCCCTGCCCCGCGGCGAGGTTCCCAGAATGGCCCTTCCCAGCCCCTA	0.668317	0.62574	0.76697	0.728242	0.749926	0.974302	0.944352	0.836091	0.915996	0.951837	0.651782	0.767078	0.725574	0.650597	0.91525	0.960888	0.961883	0.957596	0.963317	0.968408	0.956363	0.957616	0.951658	0.961688
cg21163960	SLC1A2	GCCTCGTGGGTGCCGGCTGAGAAGGCGCGGAGAGTTGGCCGAGGGGTGAGTGGCGGGGGA[CG]GTTCTCCACCCACTCGGCGCTGCTCGCCGCCTGCTTCCGTGTCCCGGGGGCGGCGCACAG	0.640218	0.757475	0.475805	0.554546	0.446203	0.885827	0.838923	0.88687	0.903966	0.672758	0.684294	0.482843	0.555676	0.571554	0.612066	0.0378868	0.0381604	0.0385257	0.0419571	0.0422848	0.037931	0.0501848	0.0439672	0.0543916
cg14994452	ZNF423	TGCTCCGGCTCCGACACCAAAGATACTAATGACTACCACATTGCCGAAATAAATCACCGT[CG]CTCAGGAGGGGCTCCGGCCCGGCCGGCGGCCTCCAAACTTCATTTCACGAATTTCCCCTT	0.486822	0.594716	0.532956	0.5282	0.537015	0.738944	0.677404	0.772134	0.781274	0.588704	0.577117	0.55388	0.518633	0.561407	0.597955	0.703307	0.674136	0.67397	0.702614	0.709355	0.673078	0.708867	0.688958	0.712837
cg22453529	C8ORFK29	AGACCAGATGCAAGGGGCCCTGGCACACGGTGCGGCCCTGGATGGAGAAGTGGTACACGC[CG]CGCGTGTGGTTCAGCACCAGGCGGCGCCGCGGCAGCGACGAGATCACGAGCCACAGGCCC	0.637351	0.66349	0.675283	0.705483	0.690458	0.886911	0.743346	0.942893	0.925365	0.763968	0.660389	0.675089	0.709538	0.651216	0.915566	0.656729	0.596124	0.688881	0.649392	0.735297	0.668746	0.794681	0.801951	0.845895
cg06888698		CCCTGCTGGGTGGGTGACAGCCGCTGAGGCTCTGAGTGACCCTGCAGGCTGGTGGCCAGC[CG]GCCGCCCATCTTCCACACCATGTCGGACGGCGAGGGCCCCTCCGCCGGTGAGTGGCAGCG	0.588878	0.499489	0.419548	0.428793	0.483477	0.82538	0.631598	0.803657	0.78623	0.83217	0.453479	0.462168	0.414034	0.46301	0.823412	0.783817	0.783702	0.767531	0.760947	0.788331	0.757694	0.800639	0.743895	0.805092
cg10219957	TMEM52	CTTGGGTGTGGTCCCTCGGGTCCAGTCTCGCAGGCGGGCTCCAGGTGGACTGTAGGGTAA[CG]CCACCAAGATGCTGGGCATCCCGAACTTGGTGTTTGGACACTTGATTGTGGACCTGCGCT	0.531806	0.536953	0.551832	0.487483	0.47686	0.798499	0.713541	0.827717	0.841489	0.838511	0.537688	0.556291	0.481137	0.477116	0.822407	0.672823	0.668007	0.656439	0.673385	0.700638	0.698003	0.68045	0.649328	0.663944
cg07617338		GTCCAGACTCTGGCCTGAAACCTCCTGGGTGTAAGGCCATGAATCTGCTCGACTTGCTCA[CG]GGCGGGAAGGAAACAAGGAAACAACGAAAAGTTTCCTGCGAAGTGACCAACATCCCCTAT	0.24426	0.309298	0.309864	0.251703	0.330135	0.539343	0.469865	0.543822	0.47395	0.35052	0.320534	0.311499	0.230604	0.346534	0.52512	0.0887341	0.0870436	0.0859233	0.108577	0.108719	0.094706	0.100335	0.139446	0.098437
cg04235071	CPLX3	CCCGGGCCAGCCTCAGGTCCCAATCCCTTCTCCCCTACTTTCCTAGACACGGTAAGAGAC[CG]GGAGGTGTCCTCTACACTGCCCCCAGACCCATCCTATCTGACACCCAAAACCCCGCTCCA	0.653059	0.601079	0.697514	0.636145	0.608872	0.900335	0.892692	0.904163	0.870971	0.301804	0.589635	0.745676	0.596979	0.647358	0.532203	0.820993	0.79259	0.825307	0.833948	0.818263	0.81278	0.802278	0.796728	0.818734
cg10521023	KIF26B	TTCAGCAGTATTAGCTGGAACGCTGTCTGGACAGTGGAAGGACTTTTTGCAGGGAGCTGC[CG]TCAGAGGACTGAGAGCCAGCGTTCAGCACGGCATCACTGAGGGCGCCTGGCATGCCTCCG	0.628884	0.539102	0.684175	0.660539	0.665717	0.900035	0.787718	0.863372	NA	0.906321	0.579016	0.720344	0.662701	0.554361	0.921195	0.894498	0.884944	0.891897	0.877107	0.887781	0.881051	0.877099	0.869503	0.879911
cg21435957	FLOT1	GTCATACCTGCTTAGTCAATTACTACTGACTTCCAGTTTCCAAAATGATGCTCTGGTTTC[CG]TTCCTATTTTCTCCATCTTTTTTTTTTTTAAAGCCTAGTCAGCTGGGCATGGTGGCTCAC	0.47805	0.59337	0.640057	0.614601	0.605897	0.863748	0.746658	0.772747	0.859041	0.694129	0.611179	0.598387	0.611113	0.534711	0.820352	0.844787	0.87015	0.832695	0.846894	0.8568	0.834221	0.875002	0.837376	0.847225
cg12995090	LOC100192426	GTGCGGGGGGACAGCCAGCCCGAGAGGGCCCAGGGTCGGATTTCGGATGGAACCAGAGCT[CG]CTCCAGGGAGTTGAAGGAGTTGGGAGCGCATCTCCCAATAATCCCAAAGAAACCGAGCTT	0.44018	0.595893	0.551753	0.543568	0.401518	0.845788	0.84144	0.745637	0.851533	0.838263	0.578752	0.628339	0.522329	0.463197	0.83828	0.148639	0.149882	0.153807	0.15844	0.16395	0.160298	0.186513	0.161355	0.145521
cg16695714	C6orf105	GGAGCTGTACAGGGGACAGGGCCAGCCCCATGCAGAGGCACCTAGTACCAAATGCCCAGC[CG]GACTGCCCGTCATTACTCTGGCTGCCATAGTGGTGATTTCCCAGAATTGTATTCCTTCCT	0.51848	0.658217	0.554988	0.480673	0.493996	0.66894	0.807062	0.849549	0.810706	0.766295	0.674216	0.553689	0.502212	0.577386	0.512939	0.848113	0.872204	0.834046	0.829855	0.831485	0.830872	0.848508	0.828413	0.831809
cg11344729	PRKAG2	ATGTTTGATGTAGCAAAAACAGACCAAATCCACCACCCAAACCCTCCTGATAATCCAGAC[CG]ATCTCCCCAGGGAGAACAAAATGGGCCAACCATGGCAGGGAGGAACTGGGTTCTGCTAAC	0.43769	0.598577	0.413525	0.411656	0.472052	0.883032	0.829745	0.593358	0.873034	0.555577	0.536698	0.438997	0.418518	0.524449	0.857555	0.804566	0.785242	0.811905	0.770413	0.798453	0.791638	0.785039	0.775301	0.828948
cg26712673	BOP1	CAGCCAGGCCCAGCGCCCGAAGGGCAGGGGCGGTGCGGGCAGGGGCGGTGCAGGCAGGGG[CG]GTGCAGGCAGGGGCGGTGCAGGCAGGGGCGGTGCAGGCAGGGGCGGCCACTGCTGGGAAC	0.444941	0.620385	0.522357	0.424951	0.479519	0.866429	0.886638	0.823777	0.909169	0.880711	0.605173	0.518456	0.42306	0.471296	0.879158	0.837439	0.818237	0.83632	0.844058	0.839031	0.827281	0.849745	0.794142	0.882261
cg23189175	BAI1	CTGGGGCTGGGGACTGCAGGAGCCTCTGGGGCTGGATGATGGTCCTGGGGACTCGGGCTG[CG]TGGAAGGGTCGGCAGGTGGGCTCTGTGGAGACGTGGTCAGATGAGGTTTCGGGTTGAGTA	0.490593	0.52249	0.531621	0.391967	0.510092	0.699318	0.700225	0.617803	0.770564	0.430278	0.501675	0.580592	0.396838	0.531223	0.481664	0.74811	0.766987	0.756645	0.792347	0.787558	0.767424	0.741338	0.707434	0.767718
cg04289575	CD276	CTAGGAGCAGTCAGCAATTACACAGACACAGCTGCTGTGTGATTCAAAGACACATATGCA[CG]TAGACTCAAATACAGAGTTGCTTGAATGTGTTCACAAATATACACACCCGGCCGGGCGCG	0.400844	0.559414	0.38224	0.331808	0.440819	0.797348	0.771399	0.647749	0.687997	0.742025	0.543371	0.431789	0.399204	0.524357	0.648217	0.772271	0.772724	0.785143	0.788803	0.782751	0.781083	0.793555	0.757271	0.785886
cg18872420	SPTLC2	ATAAAGCAGGATTACCTATATATTCCTTCCACAAGGATGAGAATTTTCTTCCAGGGCCTT[CG]TGTCCGAGGCTGACCATAAACAATGGCATCTTTCAATAGCTTCTCTAGGCTTTGCATATC	0.438795	0.445136	0.602074	0.604305	0.553998	0.764133	0.897814	0.855889	0.826108	0.708122	0.483513	0.61089	0.606726	0.451624	0.893364	0.905771	0.87823	0.898272	0.89098	0.881635	0.872619	0.881798	0.853586	0.864264
cg03614132		AAGCATACACACACATATGCAACTAAACAGATGTTCCTATTCCTCCTCCTCTTCCTTCTA[CG]GTACTCACAGGAAACACATGTCTGTGTTGTCCTAAGTCCAGTTACTAATTAGCACGTTTC	0.350766	0.440951	0.397876	0.27949	0.497655	0.865044	0.786601	0.634141	0.724518	0.661522	0.515869	0.390205	0.348029	0.450869	0.74665	0.858112	0.816554	0.824862	0.838888	0.824202	0.822879	0.800751	0.709161	0.83233
cg02522485	DAG1	AATTCATCATTGCTAGATTAGCATATTAATTTTGAGCTATGGCACTTATTTTTAATCTTT[CG]TAGTGTAATGGAAAAAATACCAGAAAGCTCAGCATTGAACTTCAAAGTGTGAAATCAAGT	0.457082	0.634111	0.503809	0.444798	0.543563	0.842305	0.848852	0.851788	0.701525	0.497903	0.646763	0.520042	0.483005	0.609247	0.620374	0.824042	0.828825	0.81717	0.832341	0.825287	0.82206	0.8393	0.816533	0.836542
cg23351271		CTCAGGCCCACTCTGTCATCCAACAAGCTCACTGCAACTGGCCCATCTTAAAAACAACAC[CG]GCTGGTCACGCTGGCTCACACCTGTAATCCCAGCGCTGTGGGAGGCCGGGGCGGGGGGAT	0.577477	0.626005	0.568248	0.631535	0.630997	0.820867	0.817224	0.83961	0.784579	0.835218	0.584045	0.580631	0.633996	0.590325	0.801624	0.777793	0.792312	0.782841	0.765876	0.784265	0.78573	0.761907	0.741213	0.806658
cg13678009	SWAP70	CTCAGGTGATCCGCCCGCCTTGGCCTCCCAAAGGGCTGGGATTACAGGCGTGAGCCACCA[CG]CCTGGCCGAATACGTTCTTTTAAATGGTCCATCTCTTTGGATTAGTAAAATGGGTGGAGT	0.357129	0.543775	0.5076	0.406987	0.360491	0.866572	0.71539	0.641978	0.800505	0.41106	0.541381	0.512804	0.393842	0.476027	0.355071	0.816065	0.794761	0.812778	0.812497	0.78152	0.797485	0.788673	0.789725	0.776771
cg19204693	LRP5	CCCGTCATTGGCATCATCCTCTCTCTCTTCGTCATGGGTGGTGTCTATTTTGTGTGCCAG[CG]CGTGGTGTGCCAGCGCTATGCGGGGGCCAACGGGCCCTTCCCGCACGAGTATGTCAGCGG	0.468842	0.603641	0.441398	0.374378	0.499631	0.78901	0.839344	0.770897	0.777699	0.824696	0.57866	0.475388	0.379787	0.559762	0.835435	0.815159	0.810912	0.795559	0.811139	0.834281	0.812209	0.829621	0.815893	0.817469
cg07278054		TCCCATTCCTTAATTTTCCTAGCCGACTGGACCCTTCCCCAGCCCTGGCCTCCTTCCTGG[CG]CGCAAAGATGGCAGTGTGAACTTCCCACCAAGTGCCAGAGACAGATGCTCCTGCTTAGCA	0.325158	0.355208	0.366686	0.297159	0.413784	0.528883	0.518419	0.743941	0.618864	0.637955	0.3421	0.392126	0.303191	0.328187	0.775307	0.12337	0.150994	0.141275	0.14886	0.139918	0.144638	0.149923	0.183167	0.130948
cg08613239		CAGTTGCAGGCGGCCGGATGCTGGACCCGCAGCGTGAGCTCCACGGCCGCAGCAGGGAGG[CG]AGAGCCCTCAACCAGGGACGGAGCCGCCCTGTCCACGGAGCATGCAGACCCACCAGAACG	0.653148	0.688511	0.680541	0.56276	0.606652	0.938064	0.882874	0.976725	0.85656	0.528297	0.658544	0.68245	0.566216	0.613739	0.630492	0.906185	0.91352	0.900096	0.914768	0.894821	0.892212	0.875696	0.838821	0.888444
cg07573020	ANKH	CATGCTTTCCTACGGTTTGAGTGCTTTATATGAGAGCCATCAGAGGACTGTGTGTGAGGG[CG]ATGTCTACAGAATGCAGGCAGGAGCTGCTGGCTTTGAACCGGCTGAATGTGCAATGCAGA	0.515819	0.653234	0.497908	0.46113	0.511958	0.861265	0.852318	0.896185	0.870896	0.781416	0.640218	0.499586	0.467292	0.62063	0.580938	0.857475	0.832698	0.857253	0.841191	0.846873	0.828104	0.847713	0.815253	0.826354
cg22248750	FAM82A1	TCTTTTCCTGTTTTCACATTAATAGGAGCTGTAGTCTGGAAGATAAAGAGCCTTTGGTAC[CG]CAAGCCCTGTCATCTGTGAGTGTGGCACAGTGAAGGCCTGGAGAGTCATGACCTAGGCCC	0.359984	0.603813	0.456733	0.366489	0.480124	0.725487	0.772383	0.800905	0.819426	0.584386	0.638733	0.49064	NA	0.571189	0.818082	0.861317	0.856729	0.88145	0.877147	0.902219	0.875766	0.881984	0.830117	0.887927
cg24211006		TTGCCGCGCTGCCCTCGTTGGCCCCCACTCAGCCGAGGGAATAACTCCAGAGAGGCCCGG[CG]GCGTGTCCTCCCGTACGCCTGGAAACCAGAGCGGCATTCCTGGCATCCTCATTCAGCCCG	0.621116	0.627098	0.631706	0.674424	0.625225	0.809807	0.750908	0.965077	0.953609	0.931051	0.615651	0.65064	0.679532	0.630633	0.906676	0.300988	0.32519	0.469824	0.451471	0.395297	0.0851124	0.0692326	0.0864884	0.354974
cg16258229	NPHP4	TCAGAGCCGGTGAAAGGCCGGAAGGGCTCCCGGAATAATAATGAGTGCAACCCCATGCAT[CG]ATGAAGATGCAGGAGACCGCAGCCACGCTCCAAAGACAAAGCAAAACAGCCGGACACCTA	0.643768	0.707146	0.670562	0.583035	0.659041	0.913786	0.890461	0.746596	0.903487	0.717693	0.693891	0.694821	0.564518	0.712913	0.867693	0.47394	0.491366	0.432626	0.441313	0.406179	0.448192	0.417074	0.255357	0.376159
cg08663634		CTTGGTCCAGAACTCAAGAATGGAGAAATTGAAATGAGTACCACGATGTGCAATTTTAAA[CG]ACTAAACTTTGACAGTGTCCGGAGAAGCTGAATCAGTGCATGGTGAGCCTGCCCTCATGG	0.645504	0.571091	0.587989	0.555098	0.530293	0.846832	0.847065	0.91544	0.806453	0.889353	0.573764	0.619102	0.571176	0.503708	0.881184	0.846561	0.85135	0.841015	0.826541	0.819499	0.805177	0.840755	0.749831	0.841516
cg06508005	RPL18AP3	GCCCAGACAGGTTCCAGGAGACTTGAGTTCAGGAACTGCATCTGGGGCTGGGTTGGTGTC[CG]TGGCAGAAGCCTGGACTTCAGGCTGTTGCCATGGGAAGTTCCCTTACCTCACGCTCCCTG	0.680984	0.603756	0.678037	0.586472	0.537196	0.845886	0.83926	0.884494	0.805699	0.671111	0.617146	0.70119	0.583509	0.595105	0.346297	0.864178	0.879041	0.85632	0.850285	0.867238	0.851846	0.853929	0.879111	0.88621
cg16575125	PLEKHG4B	TTTACCTTGTGATCTCTGCACGTATGACCCGGGAACGGGGGCCGGGGTGGGGGTGTGGGA[CG]CTCACCCCCTGAGCAGGGCTCCTCCCCTGTGTGTGGGCCCAGAGGGTCAAACGGGAGGGT	0.479982	0.491111	0.670286	0.542527	0.428443	0.893507	0.854062	0.876014	0.783608	0.292932	0.5527	0.691669	0.580843	0.489756	0.425021	0.897715	0.893372	0.881874	0.885165	0.907064	0.915426	0.909874	0.873243	0.91375
cg22973172	SH3PXD2A	AGAGACAGGGGAAGGTCTGGCCGTGGAGCGGACTGCACACGGCACTGTGCTGGCTGGGGT[CG]GCCGGTGATGCTGAGTGGTCTGTCTGGAGGCCAGCTGTGAAATGCATAGCTAGGTGGCAG	0.538238	0.656308	0.603529	0.61588	0.564433	0.888178	0.826517	0.836027	0.871484	0.908339	0.693564	0.560267	0.58212	0.595829	0.882618	0.805845	0.824068	0.83191	0.835275	0.816155	0.806468	0.841544	0.76908	0.83442
cg15729404	EYA4	AAATTTATGGATTGTTTATTCCGTCTACCTTTGCTGTGTCCCCTGGTTGTGGCATACACA[CG]TGTGGGTATAAAATCGTAAATCCTATGTAGTCGCGTAGTGCATGCGCAGAAGGCTTAGAC	0.541146	0.543178	0.608281	0.597445	0.377789	0.853096	0.810385	0.844881	0.901825	0.853976	0.591882	0.595318	0.617293	0.471719	0.904712	0.114348	0.125538	0.170153	0.122255	0.158774	0.124125	0.0980708	0.179425	0.153358
cg03362215		GTGGAGAATAACTCTGGAACTGAAATGAAGTCAGTGAACCGACACAAAACCAGATCCTAG[CG]GTGAGCTGGCTGCGGAGGAACCAAAGAAAAATGAATCCTCGAGGAACCCTCTCCCATGCT	0.281847	0.222332	0.275846	0.220241	0.248673	0.548986	0.376488	0.504681	0.392738	0.185791	0.222838	0.283783	0.229895	0.237921	0.181889	0.109564	0.124698	0.131883	0.119456	0.11361	0.116631	0.127633	0.129864	0.0991946
cg23627948		AATGTCACAGCATGTTTCCTGTGTGACCCTGCGGGCTGTCATCGCTGGCTGCCTGCCTTA[CG]CCCACAGGTCTGGTGGTGGCGACCAGCAGCTGCAAAACGACCGACTCTATTGAAGACACA	0.614663	0.661082	0.567987	0.594052	0.584389	0.811713	0.831542	0.755344	0.830721	0.828004	0.686018	0.589293	0.588009	0.583045	0.805842	0.756738	0.733947	0.776765	0.75532	0.747498	0.730023	0.756207	0.74663	0.759915
cg01104590	CARS	CACGACAGCAAGAGGGAAGAAGAGACAACAGCAGCACCCTGAGAAACAGTGACACAGCAT[CG]GCTTCCAGCTGAGACAGCGAGCTGACAGTCACGTGCCTCTCACACTCAGAATGGATTCTG	0.600673	0.658519	0.570198	0.519717	0.537553	0.843782	0.859282	0.883272	0.870169	0.856181	0.653811	0.593069	0.503275	0.579301	0.864906	0.84787	0.843922	0.855176	0.844877	0.829479	0.821374	0.82868	0.782999	0.822954
cg03564793	COL12A1	AAAGACGTACACTGCTCTATCTGACCTGTAAATGAGAATTTCAACACCTCCCCCAAGCCT[CG]CGGCGCGGCGCGTGATCTCTGGTTCACTGCCCGGGTCCGTGGGGCAGGGCGCGCCGCCAG	0.426457	0.527067	0.459077	0.548165	0.455421	0.791805	0.646091	0.710332	0.675343	0.8319	0.484144	0.470508	0.568731	0.480024	0.531424	0.251337	0.177192	0.169535	0.190842	0.126914	0.144562	0.696723	0.803119	0.837937
cg21159940	CREB5	GGAGGAGGCGAATAGTTGGTTCCTTACCAAGAACCCGGCAGCAGGCCCACCCTCCCGTCG[CG]GATAGTGGACAGGAGCTGAGAAAATACATGGACCAAATGAAAATGACTCCTTTTGACTGA	0.33917	0.554585	0.381628	0.248424	0.441113	0.850317	0.865748	0.6893	0.649418	0.871008	0.541629	0.391281	0.284712	0.451154	0.85464	0.854672	0.846976	0.870848	0.860607	0.866109	0.851734	0.862564	0.84683	0.847264
cg14480507		GCGAAATAAGCCTTTTCCAGCATTACGACTCAGGAATGTTTCCCTGAAGGACCTGGGCAC[CG]CCTCTTTGAGATGTAAATTCGAAGGAAAACAGCGCCCCTAGTGTTCAGTGGGAGGAAGGA	0.223555	0.300924	0.284382	0.253969	0.279416	0.404097	0.453404	0.450533	0.587391	0.342059	0.291694	0.295021	0.287961	0.252449	0.388768	0.153295	0.155565	0.367389	0.154367	0.123185	0.135597	0.135262	0.145637	0.143625
cg22983827		ACAGACTGTGAGATGCAGACAAAGAACTAATGTAAACCAAGGCAACGCTGTGCATAGAAA[CG]CAAAAGCAAGATTCGCTCCAGGAGTTTCATGCCACAGGATGGTCGACGGCTGGAAACAGG	0.639383	0.638947	0.687707	0.670276	0.755085	0.873967	0.902809	0.856799	0.88332	0.773626	0.657273	0.734019	0.670153	0.694685	0.640511	0.893621	0.879916	0.893399	0.867941	0.867663	0.870934	0.877687	0.865999	0.872524
cg26501369	EYA4	GGCGTCTGGGACGGATGCCTATACCTGCACCCAGCAGCACTGGAAGGGGCCCAGGCCCTT[CG]CAGCACAGCCTATCCCCAGACCGCTTAGTCCTTCATAACATATATCTCCACGGAAAAGGG	0.321162	0.390675	0.363621	0.436597	0.290342	0.546944	0.798633	0.589774	0.611019	0.755819	0.389593	0.35795	0.453807	0.341704	0.761849	0.123783	0.122318	0.0777685	0.123237	0.134315	0.120146	0.120344	0.139866	0.122737
cg19569340	RNF216	AAAGGGTATGGGGCAGGTGGTTGTGGATGTTTACTCGATATCTACTGATTTGCCCTAATT[CG]TTTGGCAAGTCATTCATTCATTCTGCAAATATATTCTGCGGATTTCCTGTGGGCCACACA	0.553268	0.620216	0.598762	0.667089	0.605243	0.874922	0.753798	0.853141	0.849978	0.773394	0.621022	0.627286	0.660509	0.551811	0.675947	0.83616	0.793138	0.827597	0.809238	0.841788	0.791687	0.837653	0.765793	0.809667
cg23662142		AATCCCTTGCCAGTAAGAGGTAGGCTACATTTAAAATAATTTCTGACTGAAGAAGTCCTA[CG]TACCGCTTGTCATATACATATGTAAAGATAATTTAAAACCCTAGGGTATACCCTTTTCAA	0.345919	0.446656	0.443643	0.488802	0.40307	0.776534	0.542963	0.831371	0.708991	0.769228	0.415582	0.514723	0.492346	0.405865	0.708046	0.132526	0.129355	0.169339	0.133231	0.122586	0.129374	0.138536	0.224857	0.161014
cg05376754		GAAGGCTGGTGAGGAAGCTGCCTGACAGCAGCGGTAATTAGCCTCCCTGCACAGTGCGCC[CG]CGGGGTTCCAGCCAAGGCGCAGCGAAGCAGCGGCCCCTGCTCCTGGGTGGCACTGCCACA	0.478727	0.558244	0.458896	0.495891	0.59778	0.832747	0.749635	0.842514	0.840476	0.849341	0.527294	0.455278	0.507178	0.592102	0.865117	0.779229	0.78302	0.815002	0.782284	0.812103	0.77908	0.793417	0.730801	0.787145
cg01971590	NCALD	GCACAAAACATTACTGAGGTCTAAGCCATATGACTTTGCCTGCAATTCTTCACTAGCTCT[CG]TCTGGGGCCATTAACTTATTTTGAAAAGTTTCCAAGAAATTCAGTAGATTTCCCTTCCTG	0.499454	0.574941	0.502862	0.376125	0.405175	0.712867	0.694237	0.874583	0.770288	0.425027	0.585869	0.5239	0.401077	0.589359	0.572793	0.83258	0.817625	0.817364	0.841642	0.792181	0.812268	0.818032	0.774475	0.804708
cg13833436	CGREF1	CCCTGGAGCTGGGAGGATGGCTGGGGGGACGGGGTGGGCTAACACCCAGCTGAGTGGAGC[CG]TCTTGCAGGGCTGTGCTTGTCTGTGCCTGGGCTGAGGAGGGCGCCGACGCCCTGGGCCCT	0.605454	0.601715	0.648835	0.570218	0.527838	0.868174	0.808821	0.907697	0.905939	0.732147	0.595044	0.683833	0.597398	0.580591	0.498983	0.831744	0.819717	0.845153	0.832264	0.869452	0.827217	0.853421	0.822152	NA
cg03954144		GCCTCCCCAGTCCTCCCTCTCTTCTGGTGCTCCCCGTTTCTTTTCGCCCCGCGGCCACCG[CG]CCGCCTCCCTCACTCGCGCCCCGATTCTACGGCACCTCCCTGGTGATCCCAGGTCCTAAC	0.667288	0.596688	0.759303	0.732799	0.646806	0.958295	0.944442	0.96766	0.861745	0.911926	0.574131	0.77063	0.722926	0.623091	0.86796	0.919488	0.801798	0.854768	0.9279	0.93935	0.923853	0.946819	0.936271	0.950017
cg16182447		GGTCCACTGCCTGGGGATGGCTGTCCCCTGAGCTGCTGCTCTGTCCCCACCACGGAGGCT[CG]TCCAGCTGCCCGGGCATGAGTCATGGGCCAGCCCTGGGCGCTGCTGCGGATTCAGAAGCT	0.434488	0.572991	0.443713	0.369156	0.473589	0.786329	0.711256	0.635181	0.822969	0.534474	0.577919	0.485942	0.387604	0.460573	0.561249	0.788671	0.766976	0.823477	0.806099	0.792425	0.766075	0.79268	0.733047	0.779341
cg00101350	MGAT3	AAGGGCTATGGGAGCACGGCGGTGTCCTCAGTGCTGGGGCTTTCAGGGGCCTTGGTACCG[CG]AGTTGACTCTTGGGGGCAGGAGGTCACTCCATGCAGGGGCAGCAGGTGCTGGCCACCACA	0.540615	0.631364	0.471891	0.427023	0.392139	0.786959	0.898961	0.800442	0.83989	0.309957	0.601767	0.508979	0.434262	0.531779	0.550267	0.903517	0.893527	0.91229	0.911662	0.887069	0.87627	0.896686	0.854424	0.878532
cg04392266		CACTCCGCGGTTTGGAACTCTGATTGGGCCGAGCTTGGCGCGTGCGCGCGATGTTTGGCG[CG]TGTTCAGTTGATGGGTCGAAGCCCAGAGGGCTGTGGGGGAAAGCAGAGAAGTTTATGGCG	0.680764	0.66885	0.716488	0.579305	0.77511	0.880256	0.825269	0.948024	0.966561	0.94767	0.658843	0.715722	0.544045	0.589164	0.944673	0.965346	0.968607	0.960509	0.959342	0.962114	0.959763	0.966542	0.970139	0.972874
cg20810478	TRIM58	GCGGCTGCGCGAGGATGCGCGGTGCCCGGTGTGCCTGGATTTCCTGCAGGAGCCGGTCAG[CG]TGGACTGCGGCCACAGCTTCTGCCTCAGGTGCATCTCCGAGTTCTGCGAGAAGTCGGACG	0.0924446	0.125893	0.0909469	0.0773685	0.115851	0.382425	0.241843	0.333757	0.436547	0.211483	0.0984411	0.105385	0.0737015	0.131216	0.213147	0.041722	0.0203119	0.0265439	0.0321507	0.0322228	0.0353662	0.944681	0.913311	0.506612
cg13707794	RCAN1	ATAAGCTAAATTCTACAGAGGAATTTCAGATCAACTTCTTTTGCAAAAGCACAAGTTACA[CG]TTGCACGGTTGGGGATGCTGAGTGAATGCATTCCAGGAAGAGTTCCGCAAGCAAGTGCTG	0.66626	0.724371	0.694563	0.690316	0.639848	0.910801	0.882514	0.92116	0.861679	0.644406	0.683386	0.706362	0.70756	0.646092	0.805614	0.505711	0.556236	0.511954	0.520673	0.478856	0.451286	0.433901	0.492176	0.537504
cg05324774		GGGTCCACCGTGGATCGTAAAAACCAGGGGCGGCGAGGGCGTGGCTCTTACTCCCCACAT[CG]CGGGGGGGCCTCATCCCCCTGCCATCTGGGTCATGAGAGCCAGGGGCGGCGAGGGCGTGG	0.590105	0.690354	0.572727	0.528681	0.523733	0.888262	0.764431	0.84191	0.880513	0.868863	0.686087	0.560563	0.551789	0.5493	0.879854	0.887132	0.881044	0.885083	0.903601	0.889216	0.852404	0.884435	0.828524	0.915786
cg25318189	GNA12	ATTTCTAATCTTTCCTCTAGGGACAGCGTCGAGCTCCCTACTGCTGGACCGTCCCAGCTG[CG]TGGCTTTACCAAGTCACCAGAGGTTAGCTTGTCTGCAAGAGGCTGGTGACACGAGGAACA	0.250265	0.259979	0.177071	0.192149	0.278577	0.34646	0.408272	0.461161	0.517123	0.772806	0.245992	0.188439	0.18206	0.237968	0.516629	0.511964	0.512373	0.533073	0.523111	0.490256	0.498352	0.512556	0.406177	0.499933
cg06197492	H19	AGGGCAGGGTGAGGCCTCGGGCACACAGCCGGCGCCCAGTCACCCGGCCCAGATGGAGGG[CG]GCCGGGCCCTGCACAGGCACTTGCCAAGGTGGCTCACACTCACGCACACTCGTACTGAGA	0.533	0.683447	0.571487	0.543303	0.533068	0.795954	0.772875	0.736431	0.82786	0.75209	0.67859	0.571306	0.556213	0.592238	0.618821	0.847894	0.823353	0.853319	0.863963	0.846928	0.844171	0.855969	0.80669	0.851242
cg00061306	FBF1	AAGAGCACCAATGGCATTTAGAGATGTAAGTCCTTTATGTGTTCCTATAGTTTCTGAGAA[CG]GACTCATTCAGAGCGTGGAAACAGCCCTGCTAACCAGCGATGGGTGCCAATGGGCGGGCA	0.458059	0.672254	0.593409	0.519326	0.556899	0.894292	0.913828	0.895393	0.949189	0.738252	0.689704	0.593493	0.516463	0.611944	0.734125	0.866194	0.872648	0.881838	0.880837	0.876701	0.878968	0.888114	0.870122	0.879262
cg09813610	IRX1	TCTGCAGAAAGGGGCTTCTTCGGTCCCGAGCTCGCGTCCAGGTGGCCAGGCCTCTGCCGG[CG]GCTCCAGTGGCTGCGATTATCGGGTTCGGTAAATGCCCCCACGTGCTTGTGTCTCTTTCC	0.432887	0.354317	0.408483	0.388681	0.34509	0.754354	0.527455	0.53913	0.697039	0.187177	0.364925	0.447958	0.386671	0.35044	0.187956	0.181043	0.180176	0.453797	0.158191	0.159926	0.153058	0.224855	0.22796	0.16284
cg15341833	UXS1	TTCTCTGAGCTCACGATATCCATGTCTTCAGCCTCAGTCCCCAAGTGGCACACCCAGTGC[CG]TGGCACAGCTGAGACTCTTTCCTTCCCACGACTGCTCATAAGCACCGTGGCTCCTCCGAA	0.611667	0.588639	0.691449	0.678694	0.558159	0.879116	0.875363	0.855601	0.888349	0.566105	0.640118	0.696495	0.706437	0.583011	0.512477	0.856121	0.878577	0.870286	0.858013	0.864656	0.852918	0.868702	0.840662	0.869533
cg07347019		GACGGCGTCTCGTATGAATCCTGGAGGAGACGCCCGTGTCGAGGGCAATTAGAATCCAGG[CG]TGAGCCCCGGCTGGCTGCGTCCACTGGAGCCGCCTGACCTCACCCGAGGGTGGGAGGCCG	0.586972	0.642912	0.505997	0.49086	0.503815	0.770913	0.809483	0.692842	0.802311	0.489664	0.606967	0.547854	0.472653	0.56629	0.706126	0.849259	0.865642	0.830714	0.843833	0.845563	0.812053	0.844291	0.786392	0.839311
cg04423187	BRD4	TTCTCTGGTGCTGGGTGCTGCTGAGAGTCGGGCACGTCCTTCTTTGGAGGTTTCACAGGC[CG]GCTGCTCTCCCGCCGCTGGCCCAGCTTGGTGGTCTTGGGCTCCGGGGGCAGCGAGGGTGG	0.549122	0.683462	0.543833	0.442532	0.543043	0.889955	0.84786	0.892861	0.871319	0.74936	0.672598	0.57032	0.451459	0.652844	0.552737	0.889001	0.866096	0.909465	0.881491	0.889627	0.890402	0.901831	0.876595	0.90303
cg00059930	RB1	GACCACAGGCAGGCAATGCGGGCTGCTCCTTGTGCACGGTGGGCTTGGCAGCTGGCTTGG[CG]TCTGCCCTGTGGCCCCTCTGTGCAGCGCGCTCATCGGTGGTGCCCCGAGCAACCCCGCTG	0.666468	0.629198	0.645732	0.580824	0.596736	0.843017	0.820333	0.853483	0.778709	0.772451	0.635008	0.667855	0.577777	0.601556	0.503557	0.843245	0.829255	0.826441	0.850159	0.679498	0.629936	NA	0.804569	0.829263
cg24427175	LOC121952	CCTTTAGCTCTGTTCACGAGACACTCGTGGGATATTCCTAGCCTTCTGCCCCCTTAGTTA[CG]GGCATTGCCGTCTCACTGCTGTATAACCAGAGGCGTGGGAGCTGCAGCTGTCAGAATCCT	0.684601	0.628015	0.681729	0.684005	0.554599	0.899696	0.923621	0.925121	0.765121	0.554316	0.661857	0.683002	0.681333	0.565082	0.656086	0.895575	0.899004	0.919215	0.903933	0.886913	0.8756	0.886785	0.858699	0.922405
cg09204108	EHD4	GCCCCGTAGACCCGCATCAGCTGCTGCGTGTCCACTTGGTCGGCCTTGTTCAGCACGACA[CG]GATCTTGTCGTCCTGGCCCCGGAAGGCCTTGATGGCCTCTGAGAATTCATCTGAGATGTC	0.60884	0.671834	0.57984	0.542229	0.556502	0.843094	0.842364	0.858724	0.869994	0.84049	0.66028	0.601713	0.538695	0.603504	0.722562	0.835335	0.828155	0.818683	0.816862	0.833313	0.819803	0.826619	0.777163	0.825759
cg10317717	UPP1	CAGGGCTTGGTGAGGTGACTCGCGGTCGCGGGTGACTCGCCGGCAGGACACTGCCTGGAA[CG]CCTGGAGCGCCTCCCACTGCAGACGTCTGTCCGCCTCCAGCCGCTCTCCTCTGACGGTCA	0.546762	0.668611	0.599572	0.605676	0.328132	0.929746	0.872569	0.893201	0.939482	0.948005	0.652755	0.642915	0.644616	0.389466	0.863431	0.0380407	0.0475157	0.0347342	0.04584	0.0470144	0.0402851	0.0340944	0.0416854	0.033992
cg14457429		CATGGGCATAGGTTGCGGGGCAGGGGTGGGGGCTTCAGTCCCAACTCAGCCCTTGAGAAA[CG]TAATGAACATAATTCCCCCCACCCCCCAGCCCCTTTTACAAACAGGTCACATTAAGTTAA	0.594379	0.587082	0.533918	0.554299	0.53803	0.789647	0.790158	0.863016	0.864714	0.825951	0.587581	0.563472	0.554713	0.606715	0.850391	0.745461	0.766842	0.748039	0.754476	0.726771	0.73471	0.753224	0.677138	0.751896
cg23230478	ACOT7	GATCCTGTGATGCACAAGGCCGGCCCTCTCCACAAACACAGAATCTCACCGGACCCCACC[CG]ATCCTGATGCGCGGCCGGCCCTCTCCACAAACACGGAATCTCACCGGACCCCACCCGATC	0.410708	0.646632	0.438878	0.463507	0.607167	0.918686	0.904306	0.74664	0.874127	0.833515	0.646826	0.408096	0.462385	0.650333	0.885043	0.917379	0.901308	0.919502	0.915064	0.939416	0.920881	0.937061	0.916347	0.937396
cg26005086	JAG1	ATCTGGCAGAAGTGGGAGCTCAAAGACCAGGGGGCTGGGCAGGCTCCTGGGAGCCTGATC[CG]AGACCGTGTCGGCTGCAAGGGGACACACAACCAGGGTACTGTTGACTAGCTTTTTGCATA	0.516593	0.621866	0.537716	0.506408	0.616136	0.769758	0.822376	0.827769	0.872758	0.878235	0.581366	0.592651	0.517968	0.59422	0.883073	0.816844	0.78261	0.78565	0.791824	0.79347	0.763461	0.783729	0.766204	0.813595
cg13527735	C3orf26	TTAAGTAACAAGGGCATGACCCCTTCTTTGACACCCATAACCCAAGGCACTGTAAACATT[CG]CTATTATTAACGCTGTGTTGGACTCAAACTTGAATGCCTGCCTGTTCCATTTAGTGTCAC	0.679717	0.743341	0.655082	0.620337	0.65556	0.88487	0.896724	0.870456	0.901021	0.630483	0.720681	0.700403	0.644206	0.651425	0.78944	0.891266	0.859657	0.866859	0.85734	0.881683	0.874468	0.865034	0.839052	0.867081
cg24536965	RERE	CTCCTTCCATCAGTCACCATGCCCTCTAGATTCATTCTTCACTTCATGGAGTTTCCTGTT[CG]GCATGCTCCTCGGTTTTTGCAAGGGCTCTGCCAACTACAGGGCCACGTCATGCCAGTGAC	0.568837	0.582828	0.515986	0.413535	0.481477	0.838909	0.828387	0.675779	0.857942	0.724648	0.568185	0.526349	0.401264	0.555823	0.531263	0.780213	0.784601	0.787594	0.783772	0.774835	0.781657	0.804414	0.765857	0.790977
cg14256977	MTMR2	CACCAAAACCTCCACTGTTCCTACTACACTCCAGAGTACCTATTTCATGTTCTCACTTCT[CG]CTTTTCCCAGCTTTTAAAACTCCATGCCTGTTATTACAGTCGTTCCCTTGCCCTTGCTTA	0.517927	0.620844	0.605223	0.501221	0.557832	0.836888	0.846783	0.837737	0.856565	0.845235	0.635196	0.60154	0.528068	0.595761	0.853132	0.787127	0.790803	0.766105	0.779338	0.784959	0.788433	0.79332	0.750911	0.781507
cg08916374	POLR3GL	GAGAGAAGATATAAGGAATGTTTCAGACAGAGATCGTCAAGCAAGATGGAAAAAATAAGA[CG]TCTAAGCAAGACTGAGATTAAAGAGATGCAATGTGAGAGAGTGTATTACAAGGTTCGCTC	0.359345	0.287871	0.295157	0.19729	0.246289	0.739624	0.654938	0.485027	0.523523	0.0967192	0.28694	0.32423	0.200793	0.246088	0.0752188	0.496007	0.480094	0.553272	0.535014	0.551472	0.520426	0.514207	0.548473	0.503208
cg25754068	PDE1A	ATCTAATAACCTCCTCTTGGCTGAAGTTGAAGATGCCATATCAACTGATAGAAGCCCATG[CG]AAGCTGACCAGAGCTACAAAAGTTAGAAAAACAAAAATTGCTAATTTCTACTGGTGACAT	0.266871	0.470247	0.249828	0.178839	0.428689	0.666594	0.545903	0.730034	0.707253	0.858477	0.481358	0.23192	0.166449	0.420453	0.850615	0.799378	0.826141	0.773863	0.811672	0.834709	0.803614	0.823318	0.785184	0.806881
cg19731541	NRP2	CCAGGAGAAAGCATCTTCTAAAGGTTTAGGAAGCTGTCAAGTTTAGATAAGGCTGAGCTC[CG]ATCCTCTGGGACCTTGGTTGTATTAATAAGGAGAAATTAATTTTTAACCACTGGGAACAT	0.616174	0.575998	0.54958	0.644623	0.595074	0.842347	0.809191	0.759492	0.797733	0.73661	0.593435	0.586559	0.650349	0.579993	0.707027	0.841855	0.815901	0.824129	0.824684	0.847762	0.8183	0.819005	0.741657	0.841764
cg24569831	RGMA	CTGCCACTCCAGAGAGATGGCTATGCCGGTCCGCGTGGCGCGCAGGGCCGGATGGTTTGG[CG]CTCTCTGCGAGGCCCGCAAGGCTGCACTTGGGAGGGCTTCAGTATGGTGACCTTTCCTAA	0.648432	0.633894	0.759236	0.716761	0.631424	0.950746	0.911143	0.963459	0.974273	0.976848	0.641942	0.760721	0.726604	0.608004	0.978573	0.872577	0.843452	0.890705	0.884786	0.920762	0.888386	0.908782	0.8896	0.918893
cg05241828	GPT	GGCCAGAGGGGCAGGCCTGCGCACGGGGAGGCTGTTGTGGCAGCGGAACAGAGACGTGCA[CG]GTGAGAGGCCTGGGGGCCGGCTGTCCAGGGCTCCCGATGGCTTTTCTCCCAGCCAGCAGG	0.568557	0.69355	0.763895	0.638381	0.636883	0.879189	0.847136	0.930159	0.892707	0.912568	0.64925	0.746141	0.675263	0.599369	0.807237	0.948445	0.947095	0.95902	0.944108	0.951274	0.960498	0.93949	0.941862	0.953465
cg10143416		TCCCTGGGGCAGCTCGGTGGGAAGGGAGCCTGGGGGCAACACCCAAACCACCAGGCCTGG[CG]AGGCTGGGTCAGCGCTTGGCATCGGAGTTCTCAGCAGCGACTTCCCCAGCACAGAGGAGT	0.578749	0.678185	0.545133	0.472839	0.596489	0.717869	0.798368	0.934016	0.904704	0.903692	0.655551	0.575248	0.494984	0.647724	0.866144	0.892162	0.88768	0.884919	0.883827	0.868442	0.870529	0.861	0.860661	0.878985
cg04912273	SLC9A1	CCAAGATTTACACCCTGGGTTCTGGCCAGATCCTGGGTTCCACCTAGAAGGAAATCTGCC[CG]GCCAGGGTGAACGGCCGCAAGTGACTGGTTTCAGGGTCCATCCCAGACTCTCCCCTCTTG	0.540784	0.644886	0.523747	0.445869	0.552139	0.871222	0.843593	0.876789	0.871462	0.863031	0.607495	0.526591	0.446114	0.636084	0.859673	0.822685	0.857233	0.838609	0.827592	0.838005	0.829736	0.812722	0.813403	0.834681
cg03110165	GPC6	CTGATCTTTGCCCAGTGGGCGTTTCCTTTCTCTGGAAACCTGTCTTTCTGTCTGCTCCCC[CG]GCAAACCAACTAATTTAATACATTTACAATTTACACAACTTTTTTTTTTTTTTCCAGTTT	0.403021	0.582371	0.542965	0.467431	0.454047	0.766661	0.85078	0.839155	0.857155	0.872816	0.597809	0.565976	0.485219	0.581057	0.892573	0.76408	0.767022	0.774346	0.769212	0.772726	0.759445	0.816785	0.743884	0.835032
cg01187496	WWC1	ATTACTATTACTTTTACAAAGTGTTTTCCCTGACACCCTCTGGAAGTCCTCCCAGGAAAG[CG]GATCCACAGCGCTCCTAATTTTAGGGACCCTGAGGGGAGCCAGCTACATTTCCAAATGGT	0.404898	0.38184	0.419473	0.395353	0.318873	0.606454	0.51311	0.597952	0.652361	0.463773	0.429208	0.442728	0.397059	0.357087	0.84937	0.172367	0.166269	0.156648	0.178763	0.200155	0.184872	0.189701	0.211133	0.24184
cg19994159		TGCCCACCCTGCGACAGGCATCTGCAGTTACCTGCTCATCGGCACGCAGCAGGAAGTCTT[CG]CTGGGGCTCCTGCCCAGCGGACTTTACTGCACCCTCACCGGCCTTGGCTCCTGCCCAGAC	0.499113	0.698975	0.542716	0.584975	0.50633	0.79893	0.834196	0.872007	0.83588	0.421162	0.662194	0.566379	0.572183	0.565341	0.732807	0.884413	0.875913	0.886304	0.880064	0.897158	0.889505	0.8883	0.867117	0.90244
cg24371534	ARHGEF16	GGGTGGCCTGAGTCCTGCAGAGGGGACCCCTGGGCGGTGTGGCAGCCCTCCTGGTCCTGA[CG]TGCTCTACCAATCGAGCCACACTCCCGCCAAGGCGACCCGCCAGCTGTGGGCCCCGAGGA	0.623743	0.629294	0.769441	0.757576	0.656192	0.873837	0.875319	0.930122	0.930371	0.953516	0.666862	0.789191	0.761744	0.591338	0.956475	0.977803	0.971762	0.970557	0.974058	0.975214	0.968796	0.972801	0.946568	0.976845
cg25273005	SSH1	GCTCTTTAAGTTTTCTGGGGCGGGTTTCCCTGATGGTTTGGAGGTTGCAGCTGGGTCCCT[CG]GGGTTCCCTGGGGCTCATGCAAGAAGGAAGATTCACTCAAAGTGGTGTCCTGGGAGTCAG	0.487934	0.65411	0.503392	0.448322	0.552706	0.896482	0.705708	0.893013	0.848715	0.898411	0.664268	0.521294	0.474201	0.568959	0.872653	0.836012	0.84146	0.837971	0.819544	0.842674	0.853458	0.845142	0.817883	0.858066
cg18477117	BIN1	TCCCCCGGGCTTCAGGCCGTACCAGGGCTCCTTGTGTTTCCCAAACAACGCTGGGCTGTG[CG]CCGGCACGTGGCACGCAGATGTGCAAGGGGCCGGCCAGAGCACTGCCTCCCTGTGCCCAC	0.554079	0.635059	0.538895	0.485183	0.54533	0.81508	0.779768	0.748678	0.677804	0.540264	0.631928	0.572244	0.482655	0.602916	0.500707	0.759524	0.727649	0.757872	0.757297	0.764812	0.762448	0.788686	0.742406	0.795636
cg03275648	MIRLET7D	CGAGACTGTCCAAAAAAAAAATTGATAATTAAATGTTAAAAGTCAGCGACTCCAGTAATA[CG]TGGTGGGCTGAGTATTAGACTACTGGCTTACATCCTCTGATGTCATTACTTTCTTGTTCG	0.708095	0.658166	0.645884	0.620257	0.554019	0.888496	0.843733	0.862684	0.91484	0.853732	0.63568	0.662724	0.629926	0.609474	0.513583	0.880042	0.874894	0.87481	0.875892	0.86797	0.874934	0.864159	0.851249	0.857205
cg24530147	PRR23C	GCGGTGGCTGTGGTTGGTCGGTGGCTGTGGTTGGTCGGTCACGCTGGGGAAATACTCTTA[CG]GGCCGCTAGGGGGCCGAGCATCTGTGCCGCTCTAGGGCCTGGCTTCCAGTATCAAGTTCT	0.562711	0.64962	0.709796	0.698042	0.758811	0.87572	0.907211	0.898358	0.939298	0.941772	0.671381	0.748269	0.710732	0.680845	0.878895	0.967786	0.96382	0.945213	0.968948	0.95827	0.967494	0.966788	0.954384	0.968991
cg04612732		CCACTAGCGTTTCTCATGTCCCCGCTCATTTAATCCCTGCAACAGTCTATGAGCTGGATA[CG]GTTATTATCCCCACTTTGCAGGCAAGTGAGGTAGAGGCATGGACAGCAGAAGTGACTTGC	0.455285	0.594849	0.594983	0.483592	0.574088	0.721967	0.768229	0.788896	0.86395	0.487306	0.583141	0.588059	0.507838	0.555728	0.504779	0.834654	0.815746	0.84936	0.821235	0.806479	0.816754	0.825849	0.775059	0.828511
cg15555527	ANTXR2	AGGCCGCTGCCGCCGCTGCAAACAGATGTCAGCGACAACCTGCTAGCTTACACCTGGACG[CG]CGGCCCTCACCTCGCGCGCCGCGCTGAAACATTCATGTCTCGGAGGACTTCCCGCCGCAA	0.674193	0.609893	0.644233	0.723978	0.551588	0.930395	0.818196	0.889599	0.92097	0.797339	0.559162	0.701182	0.797545	0.565264	0.753894	0.289975	0.220866	0.0803424	0.235261	0.0318676	0.0361115	0.0282467	0.318034	0.035295
cg17778211	LHPP	AGAAGAGAGCGTCCTGGGAAGCCAGCTGAGAGCACCTCTTTCTCTTTGGGTCCTGCAGCC[CG]TGGGTGGCAGGGCGGTAACCCCATCTGCCCAGAACCAGGCTGCGCTCTCGGGAGGGAAAC	0.5126	0.448785	0.462033	0.540783	0.366381	0.651953	0.62905	0.744789	0.788156	0.578333	0.444495	0.507456	0.530991	0.429035	0.429713	0.764974	0.776512	0.760557	0.759886	0.769174	0.748559	0.738376	0.707275	0.756885
cg18239042	NAA15	GTTAGTTTACTCAGCTTTAATTAGATAGTTGAGTCATATATTTTCAACATTTTTCTGTAT[CG]TATTTATTATGCACAAAAATAAAGTGTGATCTCTAATAGCATGGCTAAAGGTAATGCCAA	0.632232	0.726031	0.647861	0.555477	0.602742	0.880859	0.875215	0.782185	0.865926	0.886931	0.684445	0.596678	0.561971	0.656756	0.870685	0.901048	0.882259	0.885527	0.877605	0.886912	0.86194	0.891392	0.858797	0.897014
cg00594561	DLX3	TTGGAGAAGGGGAAGCAGACCTGTGTGGATTTAGAGGTTGTTGGGGATGTACAGCCTGTC[CG]GTGATACCAGAACTATCTCCAAAGCTATGTATGTGCAGTTTCACAGATGGCCCAGTCTTG	0.425982	0.48137	0.355058	0.291629	0.353209	0.790061	0.636541	0.676934	0.784149	0.477613	0.431024	0.382749	0.299049	0.397394	0.455181	0.653311	0.654714	0.653088	0.689381	0.707876	0.686905	0.691322	0.641587	0.693186
cg24910374	KRT31	AAAGAGGCTACACAGTCCAGCCCAAGTATCTGCCCTCATTAATTGAGGTGTTGATCCATC[CG]ATGACATTCTTTTGTGTCACATAATTCTGCAGGCCCATAAACATACTCATGTCCTGGTCC	0.658552	0.67027	0.591299	0.580515	0.634655	0.84672	0.812306	0.87095	0.892279	0.879503	0.594969	0.635325	0.576992	0.633354	0.853666	0.817432	0.796454	0.819513	0.802443	0.806301	0.808591	0.799685	0.770151	0.807373
cg26292910	IP6K2	ATGGCCCTGAAGGCTGGGCTCATCCTCCGGGCGCAGATGGCGGGGAGATGGGGGAGGCAG[CG]GAGTCCAGCGGCCAGTACGTCTTCTGTCTGTTGTTTGTCCGTGTGTCCCTCTCGTCTTGG	0.474869	0.553154	0.511606	0.333068	0.416738	0.828923	0.880426	0.730794	0.816812	0.505556	0.556789	0.504007	0.335304	0.438097	0.56685	0.823243	0.82388	0.85095	0.786137	0.827676	0.81132	0.856939	0.764448	0.809705
cg21435101		CCTGTCCCAGGGGGTCTGCTGGGCTCCACCGGGCCCCGCCCTGAATGCAGCCTGGAGCAA[CG]CTGGAGGCCGGGGCTAGGAAACTGTGAGCCCCGCCTTGTCTGTGTCTTTCTCAGGGATTC	0.536386	0.544727	0.599581	0.629522	0.561499	0.90033	0.682948	0.901585	0.920399	0.537499	0.51903	0.608605	0.632632	0.497008	0.87572	0.6665	0.7094	0.760557	0.744918	0.736447	0.742008	0.769208	0.714736	0.752145
cg07385573	USP36	CATTAGGACGCTGAAACCGGGACACAGATGCGTAGAGCAGAATCATGAGCAAGGCGTGTC[CG]GGACAGGATCTAGTGCCGAACCCAGTGAGGCTCCCTCTTGCCAGCTATGTGTCTCTAGGA	0.581622	0.737139	0.653888	0.637627	0.668494	0.888957	0.874909	0.877264	0.864701	0.765431	0.772985	0.662885	0.616699	0.71931	0.874839	0.895941	0.895431	0.883436	0.862761	0.889545	0.85933	0.886798	0.856482	0.892309
cg27333269	EFHD2	AGGCTGCAGTGTGGTTGGAAGTGGCATGCAGCTGAGGGAACAGTCTGGAAGCTTCATTTG[CG]CAGCAAACTCACTTTTTTTTACATAGGCTGTTTCTGGTCTAGTTTGATGAGAGGTACTCT	0.592812	0.700084	0.603959	0.608207	0.509265	0.801415	0.893827	0.821118	0.899555	0.915099	0.717251	0.620679	0.636463	0.616795	0.904074	0.874739	0.879345	0.888026	0.854508	0.875045	0.882327	0.874255	0.846451	0.881127
cg13391313		CCCACCTGTTGACAACTCCCCACCCCAGCCAAGACTGCTCCCTGCGCAGCCATGAGTGTT[CG]GCCTAAATTCAGCGTGGCTCGTGGAATCAGGCAGCCTCCTGTGTCTTGTTTCTTCAGCCC	0.525899	0.566791	0.577796	0.490628	0.504687	0.793243	0.792017	0.813332	0.821542	0.567047	0.529268	0.616363	0.498767	0.521768	0.801944	0.737228	0.744918	0.760515	0.741294	0.765704	0.744696	0.72823	0.685666	0.784671
cg20710519		AGGAAATACCACTTGATGACCTGCGATCTGGGGAAGCCGCGCCAGGGCTCTGCGAAGCTG[CG]GACGAGGGAGGCGTCAGTGTGGGGGCTGCAGCTCAGCTCCGGGGGGGACGCGCCTTTCTC	0.627521	0.637835	0.695299	0.504858	0.523327	0.830454	0.793453	0.878633	0.812179	0.566005	0.630006	0.724794	0.506976	0.47629	0.691804	0.91881	0.904532	0.923978	0.897258	0.910538	0.913121	0.898362	0.901549	0.928527
cg15503081	DNASE2	TTCCATGTTGACTAGGCTGGTCTCGAACTCCTGACCTCGTGATCCACCAGCCTCGGCCCC[CG]AAAGTGCCAAGATTGCAGAAGTGAGCCACTGCGCCCCTTAAGAAGCATTTGTGTTCCAGT	0.473755	0.551448	0.424509	0.288098	0.354836	0.759208	0.742154	0.625582	0.701952	0.58513	0.485997	0.436653	0.292333	0.354912	0.850911	0.817068	0.814837	0.843844	0.837379	0.813516	0.83212	0.807846	0.789905	0.833375
cg03654920	ADAMTSL2	CACCCTCTGCAGCCCTGCTGGCATCTCAGGAGATGGGCCCGAGAGAGGGAGGGGCTGGGG[CG]GCCCTGCAGGCTCTGCTCACACTGGCCTTGCCTCTCTGGGACTGAAGAAAGGGCTCTGCC	0.547386	0.60411	0.49831	0.410959	0.46277	0.753027	0.803923	0.806394	0.802486	0.774436	0.562075	0.528794	0.39679	0.539429	0.784616	0.792388	0.784825	0.789601	0.783306	0.782117	0.774034	0.799394	0.776602	0.795381
cg15246706		GCGACCCGTCTGTGATTGTGAACCCATAAAAGTGGCTGGTGGGAGGCCGGGCAGAGGCAG[CG]GCGGGCTCGGAGGGGCCCTGAAGGACATGCCCCGTGAAAGTGGAGGGCCCAGGCGGCCAC	0.58853	0.673538	0.593944	0.577439	0.64271	0.833979	0.831906	0.779652	0.822944	0.75308	0.664543	0.610666	0.605215	0.702299	0.712181	0.807794	0.805291	0.813622	0.796179	0.812923	0.799064	0.813183	0.760305	0.829643
cg15925343		AAACCGTTAGGATCACAAGGGATGGCTGAAGTTCAAGGAAAATTAGCTTAATGCATCTTT[CG]GAGCTGTCATTAGCATTGGAAAGACAAAAAATAAATTGACAGTGGCCCAAAAAACCCTGA	0.451689	0.621916	0.621713	0.608211	0.529765	0.716185	0.859287	0.815103	0.829207	0.842526	0.654571	0.633973	0.605642	0.552505	0.839072	0.880946	0.837321	0.757651	0.854432	0.85751	0.863061	0.856488	0.836998	0.86656
cg04057861	C13orf39	TCACTGGAACAGAACAGAGGCTGCCCCTGTGGCATCCAGTTGCTGCGATGTGGTTCGAAA[CG]TTAGACTTCCAGTTCACTTTTCAAAGAAGTGGGTGTTGGACAGTTGCACAGACTTGCAAA	0.574272	0.539287	0.511383	0.581524	0.435534	0.792797	0.652669	0.800451	0.844865	0.39272	0.495458	0.546185	0.564912	0.477026	0.173383	0.764128	0.770226	0.769718	0.764108	0.751934	0.752164	0.766231	0.738655	0.768006
cg27053299	CLYBL	GGTCCCTGCAGCCCCGAATCCGCACCCGAGCCACGCGGAACGACTAGCCCCGAGGGGCCC[CG]CAGGCTCCCGGTGCAGCTCCCTGGTCGTGGTCTCCTTGACCGAAGCCCCGGCCTCACACC	0.597269	0.644452	0.66523	0.472644	0.60949	0.843224	0.884614	0.816736	0.864027	0.514066	0.633433	0.647593	0.502644	0.610485	0.191849	0.748686	0.671266	0.728536	0.706941	0.748662	0.701793	0.87323	0.877697	0.915567
cg10471743		AGGCTGGAGGGCAGAGGCACATTCACGGCTCACTGCAGCCTTGACCTTCTGGGCTCAAGA[CG]AAGAAATTGGGGATTGGCTTAAGTAATTGCCCAAGTAATTGCTTAAGTAATTGCCCAAGT	0.27301	0.402697	0.287821	0.154712	0.351865	0.531748	0.683853	0.646061	0.554948	0.738811	0.397407	0.267894	0.147854	0.386964	0.733888	0.739818	0.726353	0.75045	0.770251	0.703505	0.725673	0.701729	0.618375	0.752344
cg21477262	ETNK1	GATTTTCCAGTTTCTACCATTCCCTGTAAGGCACTGAGACGCAAGATTTCAAGGCCCACT[CG]GGGTACCCTGGCATGGACATCGAGTCGTTCTAGCGCTGAGCTTCAAAACTATTCCTTTCC	0.484467	0.41248	0.511288	0.583188	0.45367	0.814071	0.804803	0.604751	0.837092	0.57425	0.410853	0.536265	0.592923	0.399081	0.554198	0.769907	0.743787	0.724054	0.734416	0.770299	0.695702	0.756266	0.77195	0.711484
cg07990556	FNIP2	GCTGGGCAAATGGAATAAACAGCACAGATGGTGACAATTATATGCCGTCACGGTGAGGAC[CG]AAGAGGTGTCACATGTGGTTTGTTTTTTATCTGATGCTTAAACAAGTTCCTAAAAGTAAT	0.552645	0.66863	0.544872	0.59613	0.688449	0.752785	0.765173	0.878399	0.882944	0.698989	0.643572	0.561585	0.583698	0.683908	0.662454	0.880115	0.872663	0.881322	0.893106	0.881528	0.871004	0.895388	0.836897	0.888281
cg16721321	LOC100130872-SPON2	TGCGCACACGCACACGCCGCCCGCCCACCAGGCAGACACCCACACACCTGTGCACGCACG[CG]CACGCCAAGCCAGCGGGCCCTGCCCCTGCCCCGGAGCCCTCAGTGTCAGAACCAGGCTGC	0.483035	0.661423	0.496992	0.426788	0.581734	0.787994	0.878923	0.84189	0.881924	0.888319	0.638617	0.527663	0.413282	0.587398	0.881681	0.897851	0.901336	0.879331	0.855038	0.891299	0.873511	0.89509	0.8634	0.880363
cg15895268	ABL2	AGCACTAAACCAGAAGCCAGAAGACCAAAGTTCTGGTCTTTTCTCTGCCATAACTAGATA[CG]GGAATTTTACTGTGTTTCCATTTCTTCATCTGTAAAATTAAGGAGCAGGGGAAAAGATCA	0.531085	0.685612	0.522982	0.578347	0.617132	0.871097	0.809901	0.833273	0.754821	0.877147	0.683759	0.528293	0.603321	0.67666	0.895968	0.85974	0.829767	0.833603	0.836108	0.859743	0.826709	0.858409	0.82212	0.859328
cg25457884	MYT1	AATAGCTGTGGGGAAAGGTAAGTCAACGTTACGTTCTTTCTGACAAAGGCAGATACCCAA[CG]CTTGGCTTTTCCTCTTGGACAGAGACAGGGAGAGGGCGCGCGGGCAGAGTTAATTTCTAA	0.618626	0.607896	0.552276	0.618309	0.590577	0.782453	0.691603	0.902133	0.857412	0.845307	0.605074	0.569766	0.646727	0.613573	0.870198	0.720018	0.734774	0.786249	0.770899	0.718809	0.739439	0.732853	0.703708	0.708189
cg22933582		CAGCTCATTTCAGGACAGTTCCAGCCTCTTTCGGCGCATGCCCTGAGGAGGACCATGTAA[CG]AGAGGAAGGAATGCTTTCCATGGGGTGATACTGACCTTGCCTTCGTAGCCATTTAAACAC	0.261508	0.498089	0.400131	0.405402	0.370389	0.858325	0.66827	0.626361	0.844989	0.649255	0.487571	0.405817	0.437538	0.472225	0.891691	0.674766	0.693671	0.705852	0.677287	0.729429	0.6929	0.710196	0.69385	0.726586
cg22633049		GACGGCCAGTCCACAGGACGCGCCCGTAGACTTGGACCAACAGCTGAAGTCAGCCCCTGA[CG]GCCTTCACATCTCCCAGCTGGGAGTGCCCTTAAGAACTAACCCATCAGAATGGGTTTCAT	0.558068	0.677666	0.622391	0.644674	0.525583	0.855247	0.796257	0.889997	0.908822	0.869461	0.668234	0.663234	0.672272	0.584771	0.861591	0.881489	0.869997	0.856727	0.870731	0.866803	0.864325	0.841248	0.852235	0.83723
cg13827487		TGATCCGATCGACGTAGTGAAAGCCTCACTTTGCTGTCTGGACAAGTACTGCCAGGGGCC[CG]CGGGGACCGGGATCGCTGTGCAGAGGCCCCACTGGCCCTCAGGAGAGGTGAGGGTGCCTG	0.548702	0.611274	0.56131	0.699209	0.663286	0.866259	0.808735	0.862569	0.828548	0.497748	0.578108	0.569143	0.701923	0.647883	0.536372	0.851792	0.858289	0.854956	0.850783	0.870592	0.845608	0.867956	0.8501	0.871131
cg14365457	GSN	CCCAAAGTTACAGGACTAGTCGATGTCTGGGGTTCCAAACCAGGCCTTCTGACTCCGAGG[CG]CCTGCTTAATGGTCCACTTTAAGGACCAGGGATGCACTTGGCATTTTCGTTACTTCATTC	0.579241	0.47549	0.551867	0.541425	0.499143	0.843197	0.756219	0.618953	0.82011	0.775935	0.494578	0.574668	0.549386	0.481199	0.633552	0.715192	0.688365	0.742325	0.712661	0.730972	0.718114	0.729383	0.692539	0.683561
cg18918418		CATGGGCAGCTCTGTGGCTGGGATGGCCCCTGCAGAATCACTTGAGTTTGGGCCAGGAAG[CG]TTGCGACTGGTAGTTGGATAGAGGCTACCCCAGGAAGGCTAAATGGCCTTGAGCAAGACT	0.49388	0.608854	0.450943	0.449081	0.58753	0.785938	0.729135	0.783072	0.72348	0.578503	0.547832	0.499766	0.453908	0.577716	0.656452	0.848028	0.856458	0.83685	0.831904	0.855212	0.810598	0.840165	0.797155	0.795983
cg07297039	ISLR	GCCCTCCAATTGCTCAAGATGGACAGCAACGAGCTGACCTTCATCCCCCGCGACGCCTTC[CG]CAGCCTCCGTGCTCTGCGCTCGCTGCAACTCAACCACAACCGCTTGCACACATTGGCCGA	0.524371	0.664409	0.496428	0.61116	0.607482	0.806903	0.826927	0.837385	0.817858	0.806173	0.663335	0.476905	0.56624	0.639812	0.833928	0.854103	0.819605	0.855935	0.814211	0.849432	0.818178	0.832368	0.83621	0.86927
cg21778348	HOXA7	CATCATCGTCCTCCTCGTCGGCCTTGTCCGCGGCAGCAGTGGCGGCGGCAGAGGGCACGG[CG]CCCTCGGGAGCTGCGGCGGCAGTCGGACCTTCGTCCTTATGCTCTTTCTTCCACTTCATG	0.468382	0.508058	0.496318	0.462556	0.572057	0.840862	0.801696	0.759502	0.839636	0.860824	0.532023	0.484675	0.496638	0.520094	0.853825	0.150471	0.149724	0.110123	0.111096	0.108561	0.104419	0.109915	0.290861	0.086862
cg24133207	MIR149	GAGGCCTCCTGCCTTTGACTGCCGTGCGTCCAGCCTGCAGCGGGCCTCAGGGGGCCGCCT[CG]ATCCAGCCTGCCCGAGGCTCCCAGGCCTTCGCCCGCCTTGCGTCCAGCCTGCCGGGGGCT	0.403614	0.489702	0.52643	0.580089	0.355275	0.669542	0.813304	0.802782	0.859362	0.420688	0.541977	0.562905	0.500286	0.43019	0.293357	0.0921809	0.091828	0.105755	0.0650793	0.0770754	0.0762624	0.08271	0.16171	0.0685988
cg16061472		TCCGTCGCAGCCGGGGTTCAGGAGCCAGCGCGTGTGTTGAAGTTTCTTGGCCCGCTCACC[CG]GCCGGCGGGGAATCCTGCGTGGCTATGAGGTTTTCCGAGGCCCGGTCGCCCGCCTGGTCT	0.598625	0.705743	0.685606	0.510547	0.623613	0.861788	0.820305	0.94745	0.892473	0.928081	0.712244	0.680981	0.490824	0.612088	0.936086	0.899529	0.903814	0.934158	0.914712	0.90791	0.897197	0.915482	0.902716	0.949221
cg09185632	LGR4	TTCAAGATAATCCAGCTCACTAAGAAATAAACATAAGTACTTCGTGTCATAATTACTCCC[CG]TTTCGTCTAATTAAATGCAAGTATTGACCACAGTTTACTTTCTATATAATCCAAGCTATT	0.586829	0.696438	0.608786	0.461121	0.585357	0.916397	0.843586	0.87578	0.893852	0.715343	0.698399	0.605772	0.461879	0.614975	0.848276	0.905913	0.882446	0.901555	0.886758	0.875671	0.880559	0.904956	0.901059	0.903294
cg23707719	SLC45A4	CTTCAAGAAAGGCAGAGTGGAGTTAACTATCCAAGTTTCAGCCACCCTGTGTTGCGTCAA[CG]AAGGCCAACAGTCGGGTTAAAAGCGGTGCCAAGAGAGAAACCCAGGCATTCCCTCTTCCA	0.452864	0.569259	0.454616	0.360409	0.466713	0.734874	0.757119	0.787464	0.754036	0.763994	0.549618	0.460825	0.353825	0.505426	0.762928	0.757753	0.745456	0.737676	0.750256	0.756867	0.744164	0.740579	0.739045	0.734503
cg11170044		ATTTGATTTGGGCTTTCTACGGAGTGCGCGCCGTCTCTGAGCTTTCGTGATTTCATCTTC[CG]GAAGGCGAAAATCATCCCTCTGCTGAATTGGGTTTTGATTTGCTGGTGTTCACCTGACAG	0.537379	0.55174	0.665844	0.545833	0.52708	0.82669	0.809805	0.867222	0.853416	0.555648	0.553788	0.694025	0.542212	0.548047	0.826774	0.812315	0.822572	0.797543	0.78905	0.807636	0.805291	0.809932	0.757782	0.818254
cg26782539	STK32C	ATCGAGGCAGAGGCTGCTCCAGCACCAGCAAAGCCACTCCAAGGCAGCCCGGGCCGCGGC[CG]CACAGGCAGGGAGCAGCTGCCGCCATGTGGCGTCACCCAACGTCACCAGATGTTAAAGGA	0.639581	0.7593	0.60616	0.53407	0.630823	0.948488	0.927324	0.781878	0.968051	0.742224	0.701292	0.628668	0.575617	0.69733	0.578009	0.940157	0.952807	0.949738	0.935868	0.937915	0.94035	0.94598	0.924238	0.946639
cg22394663		TACATGAAGCTGGATGCCTTCCTCCCAACTTTATTATAATGATCCTTGGATTGGGTAGAA[CG]TATCCAAGACTTCTGCTGTCAACACACAAGTGAATTATCCATCACATGGCACCTGCTGCC	0.52295	0.704084	0.538118	0.548048	0.571213	0.859751	0.832154	0.901433	0.883491	0.817893	0.677068	0.595284	0.56775	0.682138	0.893949	0.857336	0.850303	0.84782	0.854034	0.840568	0.813106	0.856179	0.836143	0.86678
cg14815743	AP2S1	CGTTGCGTGTGTCTCTCGGGAGACAACAGTTTAAAAGCATAAATTTGAACCGGCCCGGCG[CG]GTGGCTTACTCCTGTAATCCCAGCACTTTGGGAGTCCGAGGCAGGCAGATCACTTGGTTA	0.737655	0.590861	0.590757	0.508432	0.612008	0.953828	0.9243	0.885763	0.870703	0.559839	0.541867	0.656527	0.524374	0.586489	0.912376	0.922128	0.928768	0.927801	0.916567	0.90125	0.907933	0.918396	0.919521	0.908959
cg26091965	LOC493754	GGGCCTGCGGGGAGCCCCCACCCACTGGGGCGGCTACTGCCTAAGGTACAGGAGGTGGCC[CG]GTGCGTGGGGGAGTTGCTGGCTGCGGCCGGTGCCAGCCGGGCCCTACCTACGTCCTCCTC	0.620964	0.693064	0.635886	0.5202	0.574292	0.770981	0.753892	0.865288	0.862175	0.667674	0.660767	0.665505	0.525748	0.611197	0.817584	0.844313	0.85622	0.864286	0.846534	0.854777	0.847652	0.855979	0.838858	0.875598
cg05274056		TTTGTTCTTGGTTTTAAAGAAGCTTTCTCCAGCATCTCCCAGATGTGTGCGGGGGCTGGG[CG]AGCGGGGAGAGGCTGGGTCCAGCTGCAGTTAGAAACGAGGGAGGCCACAGTCATCTGGGG	0.631842	0.724359	0.570908	0.619012	0.693982	0.883298	0.870595	0.861188	0.90138	0.862183	0.702972	0.628242	0.627936	0.737795	0.847445	0.882715	0.864789	0.839113	0.867801	0.858709	0.840414	0.868596	0.898864	0.873591
cg08387426	ERCC4	AGTTAGGCATCACTTGAACTTGCCTGTGCCTGCTCTTTTTCCTCCCTGCACCGTCTATGC[CG]GGCTTAGCATGTTTCTTTTTAAATGAGGTTTGTCAGGATCAGGTAAAGTTCCTACAAGTG	0.515593	0.694722	0.596922	0.620309	0.524736	0.884856	0.847767	0.899686	0.876156	0.392883	0.689499	0.600516	0.612085	0.595738	0.553906	0.873542	0.868315	0.894632	0.879579	0.867323	0.85576	0.880502	0.852116	0.86833
cg01566213		GTGAGGTACCCAGCACCTCCTCAAAGGCCTTTATGTAAATCAAGTCCTAATTAGGCCATC[CG]GCGTTTGTGTAGAATATCATTTTTTTAATTACCAGCCCTGGGCAGGTTCCCCGGCTGCCT	0.556238	0.59417	0.601868	0.582946	0.562269	0.852914	0.826259	0.819044	0.868428	0.89389	0.600857	0.61719	0.597752	0.560292	0.859492	0.768937	0.752143	0.715001	0.713432	0.685247	0.647165	0.674055	0.655817	0.661404
cg04731861	ARPC2	TGGAAATTCTTACCCAGACCCTCAAAGCAAAAGTAATCAGACAAATTAATTTAATTCTTT[CG]TTAGTGTACACACCAAGAACCGTTTCATAACTGAGAAGCTAGGCCTGTCAACTTAGCTGG	0.539544	0.697548	0.516522	0.443403	0.565959	0.914547	0.911845	0.867395	0.882093	0.906614	0.680277	0.499595	0.428393	0.646363	0.916243	0.91048	0.875291	0.88015	0.893581	0.891324	0.880496	0.912887	0.89067	0.891898
cg04307274		GCTCCCATTTTTGTCACTTTTATAAACAGCATTGCTGTCACCATTGCCACCCACACAGCC[CG]TTCATTCCCTGGTGTGGGGAGGGAAGGGAGAAGAGAGGTTGTCAATTTCATAAAAAATCT	0.450482	0.645183	0.534762	0.446125	0.525069	0.857411	0.755319	0.708295	0.799578	0.881833	0.632917	0.554427	0.464459	0.559687	0.899939	0.84447	0.821961	0.832713	0.830704	0.847098	0.840014	0.838654	0.830231	0.802834
cg24461304		TGATTTAATGGTCTATGCCTCAGTTTCCTCTCTTGTAAAACAGAGATAAAGATCATATAT[CG]TTTATGGGGTTAACTGTGAAGGCTAACGGGGGTCACTTTTATGGGGTGCTTCACCGAGTG	0.48993	0.562446	0.456493	0.42433	0.578068	0.860925	0.783205	0.629295	0.922133	0.571087	0.559353	0.471307	0.431463	0.513189	0.619514	0.269385	0.290553	0.274321	0.264587	0.275052	0.238344	0.272541	0.196528	0.240298
cg02384859	ARID3B	AGCCGAGCGCTCACACTTGGGTGTTTATTTTCACACATAGTCACATAGTGGTCACACTAG[CG]TGCTTGTTTTCACACTGCTGTCCTTCTGTGGAAAGCCCTGTCTGACTTTTTAGGTTGTGG	0.483408	0.566468	0.445318	0.421329	0.618123	0.824054	0.729542	0.705716	0.749045	0.774673	0.581389	0.450916	0.427658	0.64161	0.721478	0.841045	0.838379	0.827903	0.823971	0.834015	0.825084	0.834145	0.803079	0.812646
cg26841647	BAIAP2	TAGGACTGAGTGTTTGGGGACTTTGAGCCCCTGTGGACGCAGACCAGCTGGTCTGGAGCA[CG]TGAAACACACAGGTTCTGCGTTTTGTCTTCCACGGGTGGGTTAATTGGTGATTTTCCCAA	0.178655	0.515876	0.349298	0.1945	0.301636	0.590009	0.750017	0.597864	0.705172	0.68075	0.513427	0.325624	0.254054	0.419002	0.547119	0.830702	0.812381	0.815039	0.832839	0.800071	0.820261	0.813271	0.793192	0.833386
cg11705208	MAP3K6	GCTCTGGGCAGGCCCCAGGCGGTGCCGGTATGGGAGATGTCCATTTAGTCACGCCCCCAC[CG]GCGCCTGCCTGCCCCTGTCCCGCCTGGCCCCCACCGGCCCCATTCGATGTTCACCGCGCC	0.405041	0.589804	0.504385	0.310113	0.509252	0.727711	0.750063	0.82344	0.710613	0.775896	0.56667	0.546528	0.321721	0.53032	0.847411	0.85375	0.853617	0.866103	0.850857	0.862588	0.845404	0.882364	0.833365	0.896446
cg08149193	ALX4	GCTAACGGAGGCTCAGAGAGGGGCGGCCACCTGGTCCAGGTCACACAGCTGGGAAATAGC[CG]TCGCGCCCTGGAACCTCTGCTCAGGCTAGTCCCTCCACCGACCTGGAAGGCCGTGCGGAC	0.330981	0.558306	0.465919	0.315724	0.44425	0.679596	0.900257	0.774068	0.926237	0.480019	0.581406	0.463891	0.35224	0.389395	0.33156	0.0511475	0.0610392	0.0400197	0.0565292	0.045212	0.0384989	0.058629	0.0506146	0.0463557
cg10345724	C7orf50	TCCCTCTGACTCCGTGACCTCGGCTGCAGAGGGTCACGGCGAATTATATACACAGTGCCA[CG]CACATGGGAAGCTCTCAGTGAGAGAGGGTGGGCTGAGAGCCGCTTGGCCTGGGCCCTGCA	0.570747	0.664998	0.551516	0.444688	0.576183	0.696318	0.906398	0.950404	0.908485	0.918299	0.626148	0.565345	0.466843	0.637087	0.893674	0.923705	0.912978	0.938641	0.919668	0.925947	0.909217	0.915043	0.822207	0.903476
cg02053964	NCOR2	TCTCGTCGTAGATGATCTGCACCAGGCTGCGGTGCTTCGACTCGATGGGCGGCGGTGACA[CG]GGCTTCTCAGGCTCGGGCGGCTTGGCAGCCTCCTCCTCCAGCTGTTGCTGTGGGGAGAGG	0.721735	0.747448	0.744328	0.618793	0.783702	0.966423	0.951654	0.981055	0.980735	0.977622	0.827459	0.725681	0.632481	0.783082	0.977402	0.980538	0.978592	0.97656	0.97496	0.97033	0.978213	0.974011	0.936121	0.974376
cg00850481		TCCGTGACCTCAGTGTTTCTTTTGCACAGATCGCTTCCTCTGGCTGGGCTGGCTGCGGTG[CG]TTCGCCTTCGCAGCACCACTGGAACTGTTCTTCCAGGCAGGGGCGTCTTTTCCCCCATAT	0.61366	0.625517	0.532911	0.52241	0.630488	0.833621	0.836784	0.761725	0.828941	0.578661	0.641064	0.543216	0.516442	0.657549	0.78986	0.824109	0.82046	0.823209	0.814138	0.770623	0.78343	0.788286	0.77398	0.838373
cg13979887	ERMP1	TTGCAACACTTTGCATTCTAGCAAAAACTTTTTAGAACACAGTAGCTGTTGAAAACTTGA[CG]CCAGCTTAACACTTCATGAGCTTTGACACACCTGGGTTACAATATCTTTGACTTAATCAC	0.446485	0.43041	0.553214	0.468737	0.501081	0.660666	0.713047	0.682917	0.84791	0.656622	0.469476	0.510144	0.46815	0.489308	0.802523	0.762013	0.75942	0.804336	0.77756	0.764803	0.764242	0.80351	0.661145	0.771643
cg18515940		CATGGAATTTTATCTTCTACTACCAGGAGCACACATGTCTTACAAGGCTTTCAGCATGCC[CG]CCACTTCTTGTTCCTCATGTGCAATCAGCATGATGTCATTGACATAATGGATTGATGTAA	0.625881	0.715851	0.633827	0.560906	0.616327	0.865591	0.832308	0.78023	0.880767	0.866972	0.719148	0.640844	0.60288	0.692095	0.872442	0.863329	0.835084	0.828597	0.84257	0.850882	0.838336	0.843456	0.823814	0.855788
cg16659026	PRPF31	GGGGCGGTAGTTTAGGCCAGGGGACCCCAAAACCGGGGGATCCGCACTCACCTACCTGCT[CG]ATCTCCCGGCAGCGCCGACCTAGTGCCTGGTACTTTCTGCGATTTAATTCCCGCTGGCGC	0.532361	0.577633	0.590082	0.563415	0.512587	0.890196	0.765934	0.647195	0.79675	0.234336	0.608188	0.623801	0.545134	0.469772	0.557475	0.900214	0.905251	0.927428	0.910173	0.878447	0.862621	0.910744	0.737036	0.937805
cg07916022	GPR39	CCTACTTCCGGGCGTACATGATCCTCCTCCCCTTCTCGGAGACGTTTTTCTACCTCAGCT[CG]GTCATCAACCCGCTCCTGTACACGGTGTCCTCGCAGCAGTTTCGGCGGGTGTTCGTGCAG	0.791755	0.698736	0.80285	0.794472	0.700904	0.95622	0.964045	0.970822	0.968961	0.982218	0.719659	0.800788	0.792603	0.730445	0.968877	0.960479	0.964153	0.962351	0.965792	0.966921	0.964078	0.964055	0.952621	0.948633
cg09035995	MCPH1	ACTTGTGATAGCCCTGGGAAGAAATGCTCCCCGGGTCCTCAGAGCTTTGTTGTGGCTGGA[CG]CATCTTCTGGAACTGCGACAGCGGAGGAGGAAGCCAAGAGAGTGAACCAAAACAAGGAAG	0.510214	0.702315	0.604742	0.494902	0.582615	0.80357	0.80542	0.826945	0.877271	0.496776	0.700406	0.616227	0.495225	0.574595	0.873987	0.884582	0.892529	0.900392	0.878743	0.896498	0.887668	0.913403	0.861313	0.897253
cg14143304		GCAAGGGGCACGCAGTGTGCGCAAAGGCCTGGGGCGAGAGGAACAGGACTCATTAGAACA[CG]GCTTGCAGGCATGTTCGTTTCAATATCCCACGGGGTGGGAGGGGTCATGGGGAGCCATGG	0.195576	0.582583	0.409915	0.2258	0.332895	0.884509	0.888868	0.740868	0.689086	0.872662	0.574934	0.377361	0.259246	0.453907	0.537731	0.928424	0.937881	0.925992	0.928344	0.941192	0.925726	0.92453	0.896646	0.935012
cg05396212	KRT19	GGGGGCAAGACTGGCCCCGGGTGGACCAGATCACCAAAGCCAAACTCTCGCATCTTCCTG[CG]GCAGCGCGGCCCCTGGCCTAGACCTCTGGGCACTCTACAGCCGGGTCCCATCTCCTCCCA	0.247998	0.385724	0.370677	0.263505	0.333181	0.448494	0.560493	0.599058	0.512982	0.594396	0.382507	0.401487	0.28552	0.34231	0.550082	0.115307	0.126637	0.0888349	0.110444	0.119232	0.131424	0.0925456	0.098897	0.0819219
cg12349350	CUX1	CGGTGCTCACAAGGGGGACATTCATCCTCAGGCTGGTGGCAGGGGACAGCCCCCATCGCC[CG]CAGAGCGCACTGTGCAAACATGAGCCTCATGTCTATTAAGATTGGCTTTTTCAGCCCTCA	0.511602	0.698111	0.513554	0.477199	0.529366	0.867897	0.907025	0.852807	0.901144	0.887464	0.660765	0.51468	0.473262	0.590645	0.7951	0.874875	0.899536	0.884523	0.866805	0.87217	0.852519	0.879725	0.849481	0.869633
cg09318162	PPP1R2P1	CCCCGACGCCAGACTCAAGCGGGGAAAAGCGGGCCTAGAGCTCCAGGGCGGGAGCGACGC[CG]ACGCCTAAAACATTCTTGAAAAAGAAGAATAAAGTGAGTTGAAAATCAGTCTGCCCTATT	0.645984	0.71077	0.710598	0.597598	0.576569	0.892141	0.851393	0.829495	0.899647	0.692755	0.674935	0.719405	0.593293	0.62726	0.509007	0.886492	0.885022	0.885524	0.878116	0.881352	0.880334	0.879839	0.862735	0.897273
cg19536929		GGGTAGTACTGCCGCTCTGCACAAACAGAAAACTTTGGGATAGACAACTAGGGAGTCTTG[CG]CCTTCACATTGTTAAAAATTGACAGTAAAGAGGTTTCCATAACCCCTCCCCCGCCGCCAG	0.578561	0.667814	0.650648	0.567281	0.435028	0.919509	0.896697	0.81779	0.911314	0.706441	0.674089	0.654873	0.594932	0.541908	0.845318	0.21484	0.190672	0.178646	0.207845	0.219325	0.204326	0.252045	0.254398	0.220054
cg26385126	NCOR2	CTCTGAGCCGCCACTCAGCTGGGCTCACTTCCCCAAATCTCGCAGCCAGCCAATTACTGG[CG]ATTAATTACCCATCTCCGGAGGTAGGCGAGGACTCCGCGTAGCCAAGGTCAGCCAGTTCA	0.392983	0.605259	0.427369	0.266637	0.512143	0.908638	0.873356	0.912258	0.945345	0.735222	0.571411	0.432152	0.306829	0.564735	0.823061	0.926622	0.934283	0.944341	0.919856	0.937156	0.911901	0.926633	0.871626	0.931551
cg12587954	KIF21B	TTCATAAATGAAGAAACTGAGATTCAAAGAGGGGAACTACCGAAGGTTACAGAGCGAGTT[CG]TGGGTAAGCATGGTAAGAACCCTGGTCTCCCGGGGATCCCACAGCGATTGACGGTTTATA	0.345929	0.378893	0.36884	0.347734	0.313817	0.780956	0.575919	0.564817	0.610297	0.532579	0.349565	0.393278	0.369758	0.343303	0.306647	0.244384	0.230129	0.290224	0.306465	0.33588	0.305088	0.216563	0.235096	0.14887
cg08373573	MUC6	AGCTGGCTCATGGAGCAGGGGTCAGTCTCACGCTCCAGAGCGGCCGGACAGTTCCCCGCC[CG]CCAGGAGTCCACAAACAGCGAGGCGGTGCCCTCGGCGATACCCATGCTAGTGGTGAAGTC	0.670845	0.773029	0.604725	0.564187	0.68977	0.974146	0.940267	0.968961	0.909875	0.976059	0.70852	0.620502	0.565917	0.761104	0.985235	0.967922	0.964492	0.968906	0.970895	0.966091	0.959812	0.964132	0.941555	0.959788
cg13884871	CDAN1	ATCTCTGGACTTTTCTGCCATAATCCCAAATCAGGCCAACTCTCCTTCCTCTAGGATTCG[CG]TGGTGGGATGCCAGGCAGTGACACCCTTAGAGCAGGAAGTCTGACTGTAGACCCAGCTAC	0.648217	0.616984	0.692933	0.705762	0.641134	0.871201	0.849726	NA	0.884597	0.861682	0.598824	0.686912	0.737962	0.604482	0.870746	0.839051	0.83291	0.825278	0.81688	0.820639	0.816612	0.819817	0.788334	0.80679
cg00569091	RERE	ATGCATGAAATGTTCAGAACATGGAAGTGCTTGTGCCCCCGCCCCGCCCCAGGAGCGTGA[CG]AGGCCACTTACTGGTGGTGAAGCAGTGGCGGCAGGCGTACCCCTTCAGCTCCTGCTCACT	0.617202	0.739805	0.620012	0.583775	0.646233	0.867196	0.865711	0.855942	0.848305	0.807602	0.722317	0.633154	0.56772	0.650912	0.557441	0.868785	0.891752	0.900071	0.868569	0.878806	0.881214	0.875718	0.839734	0.879578
cg08106165		GGGGGCTGGGCCCCGGGCGCCTCTGGCCCGTCTGCCTGGCAGTGGTGGGGCAATGCGGGC[CG]AGCCACTCCCGGGCTGGACCTTGGGCTGCGTGGCTCTTGGCATCTGTACTTGATGCTGCC	0.625364	0.708426	0.617021	0.543682	0.609461	0.892323	0.865212	0.81201	0.877869	0.909997	0.665906	0.608486	0.551203	0.656081	0.930025	0.827238	0.83051	0.83982	0.816969	0.835733	0.810529	0.860792	0.816637	0.852229
cg08960448	2012-09-12	CCACAGCTGGCTAGCGGGATATCCGTGTCCACGATTGGCGCCATGTGTTTTAAGTTGCAG[CG]TCAAAAACATGAAGAGATTGCTTTAGCAAATATTTACCCAGTCCTGACTCTGCACATGGC	0.664187	0.518947	0.63396	0.487046	0.594504	0.796178	0.916647	0.917444	0.921	0.823127	0.5603	0.613745	0.479506	0.492861	0.674922	0.973859	0.973561	0.98129	0.955587	0.929554	0.956671	0.952937	0.827231	0.967193
cg02074714		AGCGGCATTGGGGTATCCTGAGGAGCCGCCTGCAAGAAGCATTCTCCTTTGAACTCGAGT[CG]TCTCCACCTGCGCTTTTCAGAGCCAGCCCTGTTCCTCTGCAGGAGGCTTGCTCCTCACCC	0.389335	0.426956	0.425355	0.474305	0.354258	0.66764	0.543858	0.64227	0.67587	0.28812	0.416509	0.452732	0.472412	0.405603	0.60028	0.575273	0.558632	0.601901	0.610782	0.569775	0.590931	0.575978	0.578951	0.585536
cg01790353	PADI4	CTCACTCCCACAGGATGAAATGGAGATCGGCTACATCCAAGCCCCACACAAAACGCTGCC[CG]TGGTCTTCGACTCTCCAAGGAACAGAGGCCTGAAGGAGTTTCCCATCAAACGCGTGATGG	0.444904	0.546145	0.527917	0.495287	0.483731	0.728319	0.731542	0.702185	0.712159	0.496462	0.521614	0.541771	0.48842	0.487759	0.709722	0.69346	0.69539	0.70883	0.677558	0.682706	0.67304	0.701047	0.633462	0.673592
cg24722950		TTGCGCTCAGGCGTGACGCCGGGGTGCAGGTGGGAGCGACGCCCGGGTGCGTGGGTGCAG[CG]CTCGCCCGCCCGCGGTTAGGCGCACCGCGGGAACCGGTCAGGTGCGCCGTGTGGGGCGGG	0.548752	0.621173	0.724189	0.648196	0.638005	0.81639	0.930269	0.886757	0.964523	0.936288	0.584594	0.725409	0.660529	0.588837	0.931361	0.0215097	0.0449122	0.0384441	0.0402193	0.0408628	0.0408889	0.04233	0.342871	0.0551004
cg20488341		GCTGAAGGAGGAGGCAGATGGGCAGGCCGAGGGCAAGGAGCCTCCACACATGGTGGAGGG[CG]GGGGAGGCTCTGCCTGGTGCCAGCGCTGGGCAGGAGGTGCTGCATGTTAAGATCACAGCT	0.465561	0.622119	NA	0.519437	0.510135	0.789829	0.806591	0.852114	0.836626	0.742829	0.633112	0.53447	0.542828	0.56823	0.669153	0.767226	0.752888	0.78597	0.775748	0.77221	0.766269	0.806794	0.769985	0.788201
cg03655371		CCTCCCGAGAGGCGCGTCCCTGTCGCCTCAGGCAGGTGCAGGCCGGGCGGGCGCGTGGGG[CG]GGGCAGGGGCGTTATCTCCTGACCGAAGAGGGCCGCACATCTGTTTATCTCTGAAGCGGC	0.495627	0.566114	0.381112	0.287098	0.442914	0.620179	0.893057	0.884701	0.929534	0.623622	0.493102	0.440524	0.31231	0.454763	0.851198	0.0349581	0.0518905	0.0420797	0.0401919	0.0504952	0.0405211	0.0435735	0.0568357	0.0457067
cg02695628	HEATR7A	GGGGAAGGGAGCCTCAGAGGCATGGGGCGTGTGGCAGCCCCACAGAAAGTAAAGCATCTG[CG]TCAGCAGCATGCACTCAGCCTCTGGTGGTAGAAGTAACCCTTGAGGCAGGTGCTCTTCTC	0.574137	0.625709	0.657146	0.722264	0.634511	0.888625	0.857866	0.841256	0.867098	0.70268	0.652675	0.628783	0.746756	0.615319	0.358907	0.405126	0.412647	0.44606	0.455293	0.380203	0.422999	0.410344	0.419261	0.467209
cg07193666		AACACACCCAAAGCCAGGTCATTCCTTTCTGGGCCTAGGTCATTCCTTTCTGGGCCTCTC[CG]CCCGGCCTCCAGAGGACACCTGGGCTGTGATGCCAAGAGCCCAAGAAGGCGCTGGTGTGG	0.432275	0.538968	0.408191	0.371141	0.433722	0.757083	0.690386	0.728621	0.720629	0.765388	0.511597	0.424462	0.372787	0.491641	0.730443	0.726811	0.71436	0.704012	0.700144	0.731735	0.712854	0.729239	0.638921	0.712726
cg18543610		AAGGGCCTGATGGTCCACTGAGACCTTTCGTAAAAGCTAGGGCGGGGTGGGCAAAGGCAC[CG]GCACAGCTGTATTTTAGTAGAGCTTCGCCAGGGCCGTAAGTGATGGTGACTTTGGGTTCA	0.513374	0.541726	0.536257	0.443177	0.559252	0.812062	0.731214	0.737939	0.679505	0.621237	0.532253	0.553581	0.434941	0.487609	0.627942	0.531091	0.549025	0.587105	0.580607	0.61038	0.568569	0.671335	0.727239	0.697959
cg19722391	HIST1H1T	AGGAACCCTAGACTCAAGAACCTACTAGAAACTACAGACCCCATGTCTAACAAGACTGGG[CG]GGTTGGCTGGGCGCAGTGATTCATGCCTGTAATTACAGCACTTCGGAAGGCTGGAGGCCA	0.65092	0.731684	0.604926	0.586463	0.603916	0.84618	0.846026	0.835739	0.892053	0.859078	0.704072	0.619016	0.577687	0.656823	0.82171	0.86976	0.837512	0.860536	0.85566	0.855323	0.856552	0.853559	0.834925	0.885023
cg02862505		CCAGAGAGAAGGGGCAGGCCTGCTGGCGGTCAGTGATGCATGATGGAAGGAACCGGGAGG[CG]CGCCCTGGAAGCAGCACTCTCTCCAAAGCACTCACTAATGACCGAGGACAGCCCCGAGTC	0.445559	0.635611	0.538495	0.423913	0.569173	0.781968	0.735787	0.686506	0.794454	0.431003	0.545123	0.532543	0.422513	0.483957	0.456139	0.168658	0.191182	0.246636	0.203123	0.224313	0.243241	0.21831	0.186385	0.208776
cg18539768	TGFBR3	AGTGTGGTACAGAAGCCCAGGGTCATGTTTATACTAGCCCTGGGTGTGGGGTGAATACAA[CG]GGTGATCTTTATACTGAAATTCACTCTGTCTTTACAAGGGAACCAAAATCCAGCCCTCTG	0.475069	0.619757	0.474747	0.405143	0.458472	0.894162	0.880464	0.769436	0.766726	0.573795	0.679201	0.503566	0.479777	0.610297	0.666469	0.743597	0.752544	0.7356	0.762671	0.748266	0.736347	0.778722	0.761334	0.781197
cg19952427	KRTAP17-1	ATCTTCGCAGGTTGGCGATGGACCCCATCTTCCATGGATGCTAGTCCTGGAAAGGCAGAC[CG]GCAACAGCCGAATGCTCTGTTCCCCCTGACACCAGTGGAGGCTACTGAGAACGCCTGGTC	0.65078	0.558316	0.635572	0.718771	0.661713	0.796425	0.868007	0.853432	0.863489	0.882558	0.548434	0.658669	0.730433	0.592958	0.884253	0.863571	0.865149	0.864779	0.865171	0.862709	0.852675	0.869586	0.836639	0.871203
cg06523224	BNC1	CTCCCCTCCTACCCTGGGGCGCCCTCGGGGTCTCACTGCCGCGGAGGAAGAAGGCAGCGC[CG]CCCTCGCCTGCAGAAACCTCATTCCCGAGAAAGTGCGGGACGAGCGTCTTGGGATGTGGA	0.244156	0.239142	0.205005	0.232785	0.165118	0.334851	0.732735	0.571314	0.579165	0.297244	0.241219	0.26763	0.257613	0.223326	0.777552	0.0870296	0.0807242	0.0915303	0.0747365	0.0830091	0.0928515	0.0988283	0.0962529	0.0909401
cg21752601	UCN	GGCGCACCTCCCTACACCAGCCTTCGTGCCCCTGGGGCTAGCGCTGGAAGCAGCACTGGA[CG]CAGGAAAGCGAGAAGCCGGCTGGGGCGTAAAGACTGCTCTGGGACCCACGGGAGTCCCTC	0.476665	0.500354	0.440751	0.415241	0.52303	0.611993	0.726781	0.814218	0.846869	0.659078	0.502744	0.471245	0.404234	0.488618	0.856822	0.35073	0.377915	0.400299	0.405909	0.41227	0.397735	0.330066	0.270672	0.281707
cg23350274	RDH12	AGATTCAGCGCTAGAGTCCATGCACTTAAACACCATACCTTTCCTTGTAATATGCATGTG[CG]TGTGTTAACTTCATTGAAGTAAAATATAAAATGCAGAAAAGTGCACAAGTCGAAAGCATA	0.596251	0.645481	0.600449	0.619621	0.519718	0.832077	0.805203	0.862754	0.84436	0.573877	0.613858	0.661012	0.597473	0.590141	0.816623	0.80791	0.776839	0.808943	0.795507	0.797463	0.780569	0.779498	0.750982	0.797199
cg17560523	EIF2C2	TAACTTGCCACCGTAACACAGCAGCCTTTAAACCGCGCTCACGCTGCCTCGCGGCTGTGG[CG]GCCCCAGGGCAGTGATGCGATGCTGTCCCCGTAAAGCTGCTGAGCAGCGCCTGGAGCTCT	0.567002	0.716413	0.567122	0.568205	0.652095	0.848666	0.845429	0.840955	0.832171	0.870407	0.646625	0.580717	0.548752	0.632758	0.88214	0.877954	0.864275	0.854795	0.836006	0.879128	0.826745	0.887182	0.847105	0.854036
cg20219172		GGGGACTTAGCCGGCCCCGGGGCCAGGGGTAGGATCAGGTTTCCACAGGCCAGACGGCCC[CG]CACAGTCACCACCGTCACCGTCACCATCACCCGGTGCTGGGCGGGCACCATGTGGACTCC	0.4301	0.679269	0.584706	0.374688	0.584918	0.969478	0.894545	0.788117	0.974149	0.927339	0.70972	0.618509	0.439461	0.608393	0.949505	0.973285	0.977027	0.97554	0.978192	0.982015	0.974432	0.978715	0.970921	0.971477
cg19683073	SERINC5	GGGCAGCTTAGGAGTAGAAGAGGAAAGGTGAATGGAAACCAGGCCTTGGGTTATGAGCTG[CG]CAGGATTTTCCAGCATCTCAGATGCAGGCGTTTAGAGAAAGAGATATAATGGAGCAGGCC	0.610839	0.575627	0.701859	0.518585	0.71115	0.878326	0.784481	0.925442	0.906362	0.914932	0.607801	0.691511	0.542171	0.607208	0.919557	0.324652	0.291529	0.29096	0.330082	0.379534	0.342056	0.320847	0.290976	0.153618
cg17316030	SYNE2	GTTGTTCACATCTTAATGATAGCATAGCTAAAACCTTTGGTAGTGTTATTTTTAGGCTCT[CG]AAAGTGTTTGAGTTATTTTTGATGTCAGTGTTTTTGCAGGGTGTGAACATCTCTTGAATT	0.567584	0.597808	0.578299	0.418504	0.545387	0.840639	0.747684	0.887961	0.878685	0.751582	0.635288	0.582619	0.456549	0.654081	0.510942	0.820635	0.838483	0.860669	0.815927	0.810824	0.811804	0.84222	0.767341	0.845734
cg22450991		TACCATCCTAGCTTCATAACTCTGAAAATAAATTTCGGGTAGAGATCCAGGCTGAAGATA[CG]ACCACACACTTAAAATGACTACAGTGCCTTTAACTATATGACATAAAGAACACCCTAAAA	0.453707	0.587381	0.547052	0.322602	0.415013	0.671037	0.749721	0.843968	0.894553	0.884475	0.606415	0.51801	0.387268	0.546566	0.895903	0.839464	0.830026	0.850132	0.823318	0.871316	0.812548	0.835048	0.84362	0.837377
cg14164816	ZNF644	TGAGCTAGTGCTAGCATCAGTTCCATGATTCTCAAATCTCCCAAAACTCAATGGTGTAAA[CG]GCTTGCACTATTAACAGCAGCTATTTATTTCCCTCTAATAAACCTGAATCAAAAACACCA	0.510119	0.569735	0.507661	0.524829	0.544926	0.918415	0.828391	0.917968	0.758111	0.672278	0.537589	0.512197	0.521426	0.600316	0.886125	0.659596	0.662261	0.679646	0.645873	0.649726	0.657728	0.790924	0.76695	0.654375
cg08802910	FAM53A	ACGTGGGTGACAAGGTTCATGGGCACAGATGCCCATGCGCAAGCCCCAAGCACCGTGACC[CG]TCGGGAGGGGGGGACACACGGGGCCAGTGGGACTCTGACCACCAACGCCCGGGGTTTCCT	0.662848	0.638021	0.729241	0.627434	0.71116	0.851185	0.882733	0.876546	0.915799	0.689702	0.662987	0.726918	0.634724	0.653763	0.557363	0.869417	0.858384	0.908041	0.86346	0.872415	0.857214	0.875219	0.816252	0.874435
cg06020352	IRF8	AAAGCTCAACGCAAAAAACAGCCCCCATGTGTGATTCTCTACTGGGCAATAAAAGCCAAT[CG]CGACCCTCATTTTCCCCCCATTCCAGGGCTTCCCCAGGATAGAACGCGGAAACGCTTCTT	0.435987	0.43217	0.471996	0.501328	0.371435	0.73413	0.550014	0.613503	0.721711	0.396798	0.413861	0.472312	0.50183	0.37863	0.606579	0.689618	0.702048	0.686186	0.696033	0.71406	0.69314	0.701291	0.60131	0.698684
cg23342718		ATCTAATGAGGCAGGAGCCTTCTCAGTGATCTCCACTTTCCAGACGAGGAAACAGAGACA[CG]CAGAGAAAGACAGAGGCTTGCCCGAAGTCGCACAGCCAGTGTTTTGGGGAGCTGGAATTT	0.330895	0.447587	0.337653	0.245924	0.246015	0.901382	0.725022	0.877543	0.643364	0.480127	0.453462	0.34691	0.235676	0.308774	0.467149	0.0311826	0.0250165	0.039455	0.0284189	0.0337595	0.033718	0.0211359	0.0359859	0.0269028
cg23080818		CCTCACTTCCCACTGCATGCTGGGGGAGGTGAATACCTGGCCGACAGCGCAGCTGGTACA[CG]CAGGGCCGGCCCTAGGAGCGTCAGGTTCATTTGTGCCGGGTTGGCCCGAGTGCTGCGCCA	0.656121	0.685184	0.790533	0.698857	0.656713	0.940403	0.920487	0.870953	0.94098	0.927535	0.674235	0.786984	0.69034	0.687218	0.928906	0.887828	0.851998	0.904888	0.911339	0.876061	0.878329	0.899662	0.879526	0.920032
cg01307776		GCGGAGGGAGGCAGGGCTGGGAGACGTTTTTTGTATCTATGAGTTAACAACAAACCCAGC[CG]GAACCCCAGGCTCAGATCTGCTCAGAAGACGGAGGGGAAGCAGCAAATGCTGGCGTCTGA	0.637994	0.669842	0.66434	0.739958	0.611146	0.888937	0.876936	0.862943	0.897246	0.889374	0.653827	0.722542	0.725854	0.620574	0.901427	0.837614	0.859629	0.853693	0.84778	0.851951	0.844164	0.848905	0.823302	0.847715
cg23443098	FRMD4A	TGTCTCATGGGCACCGCTGTCTGCAAATCTACCAGGCAGGGCTCTGCAGAGGTTCAAATT[CG]AACTGGTTTCCGCCTCTCACAAAGTGTGTTATATAAGCTGGGCTGGGAGAATTTACATGC	0.466041	0.65073	0.558199	0.581431	0.656214	0.891534	0.907286	0.905529	0.895313	0.79978	0.653706	0.554542	0.542864	0.618625	0.702475	0.877212	0.880412	0.894081	0.870479	0.878534	0.855634	0.877661	0.838749	0.867678
cg03223959		CTGCAGCCGGAGCGGCCCTAATTGCAGTCACAGATGTGGCAGCCACCAGCCTCTCCCGCG[CG]ATCTGCCGTGTGGCGTGTGCTTAATTAGTCCCTGATTACTCATTTGCCGGGTGCTGTGTG	0.406131	0.6113	0.461155	0.328066	0.439441	0.83476	0.671974	0.789612	0.841888	0.764306	0.575036	0.469658	0.348979	0.496366	0.627087	0.85336	0.856074	0.830425	0.836217	0.83182	0.867572	0.829365	0.787763	0.839603
cg16020437		GATGTTCTCATTAATTCCTCAGGCAGCAGTGTTTGCAGTTGGGAGACATGACTTCCATCC[CG]CTCCTTATAAAGTCATATGTTTTTCTTGAATAAATGCTAAATCAAACTAGTCTTTCTGTT	0.565306	0.709022	0.617488	0.670554	0.678195	0.828521	0.848197	0.895483	0.884248	0.871903	0.745262	0.662797	0.756625	0.691002	0.882072	0.86305	0.866691	0.86969	0.855799	0.862525	0.868205	0.868677	0.832632	0.8622
cg23598378	C6orf132	CAGCGGGGAGTCCTTCTCAGCCTCCTTGGGTAACTTGGGCACCACAGTGAAGGAGTTGGG[CG]TGCCCTGGCTGTGGAAGATGCTGTCAGAGCTGGCCTCGGCTTGGTGGCTGTGGTCACGGA	0.506416	0.624332	0.513647	0.442088	0.583363	0.802218	0.889147	0.90462	0.917298	0.912569	0.628685	0.597429	0.505417	0.607418	0.887305	0.784309	0.775914	0.780641	0.792836	0.792734	0.788975	0.812112	0.7685	0.78877
cg03866862	SYNGAP1	GGGGGGGGGGTCCGGGGGCCGGGGGAGCGTCGCGCTGACGGCAGCCAGAGCCTGCGATGA[CG]GGGCTGCTATAAATAACTTCTTGGAGGCTCCCACACCCAAGCTCCCCTCCCGCTTTCCCA	0.414688	0.519701	0.427449	0.336943	0.468614	0.619362	0.629709	0.738219	0.616063	0.773446	0.512642	0.444835	0.343631	0.486058	0.644269	0.115727	0.129329	0.118652	0.138653	0.155135	0.139812	0.182893	0.209886	0.126656
cg16700555	UQCRFS1	TCTCCTCCCACTCTATCTAGCTGGTTACACTTTAGTAGGCTACACCACCAAGAATCCTTT[CG]GAAATTAAACTGCCCTGTTGCAAAAATCATTCTCCAAATATTTACATGAGCTGCATTAGG	0.606034	0.663025	0.666534	0.530179	0.543963	0.89353	0.852872	0.882298	0.904025	0.859269	0.652648	0.684789	0.546375	0.579768	0.901446	0.818371	0.843407	0.822409	0.834586	0.829229	0.840384	0.857631	0.804474	0.856901
cg19987354	SYNE2	CACCCCTGGAACTCTCAGCTTTTCATGAATTTGGTTTATATTTTTATAATATTTATCTCA[CG]CCCTCATGTTAGAATAAAATTGGGATGGAAAGCCTCTAAATTAAGCAAGAAGCTCAGCAA	0.530515	0.726068	0.615319	0.532843	0.603431	0.813488	0.880582	0.897047	0.869324	0.876749	0.757332	0.654428	0.609797	0.721014	0.906861	0.178566	0.16886	0.188081	0.199782	0.197061	0.163969	0.231714	0.349467	0.193152
cg03749154		CATGATTCAGCGAGCTCACTCTAATTAATATCTGCAGTATCTCATCTAGGAGGTGGGTTT[CG]GGCTTGGGGGACAAAACACTTAAAATCCTTACACTCTTCTACACTGCTTGAATTTTAACA	0.380231	0.536383	0.392146	0.216507	0.39869	0.794228	0.615751	0.898713	0.832759	0.771086	0.589152	0.405452	0.231061	0.504962	0.548322	0.832598	0.809536	0.827019	0.801012	0.80901	0.825622	0.827747	0.747494	0.803327
cg03580292		CATGGACATTTTGGCAGAAAGTTGGTCATATTAATGTTCAGGCCACAAGTTCCCATTTCA[CG]TGGAGTTGCTGCCCGATTGCAGGAAAGTGCTAATGGTTAGGATTACCATTGCTTAAACTT	0.181194	0.298321	0.20014	0.17269	0.195042	0.432632	0.585774	0.805275	0.457137	0.287946	0.314467	0.258212	0.21682	0.240399	0.523725	0.377254	0.40896	0.403546	0.410374	0.40271	0.363748	0.419392	0.3959	0.375286
cg24192660	ANO8	GAGGCGCGTGGGGGGCAAGCGGGGCGCCGGGATCGGGGGACTCACCCTCCCTGGGCGCCC[CG]CCGGAGCACCGTGCCCAGACACACGCCGAATCCGGTTCCTAACTCCGCTGCTTTGGACGC	0.609933	0.809963	0.737855	0.69471	0.67665	0.959486	0.977196	0.93597	0.856482	0.846467	0.784806	0.731998	0.706444	0.662396	0.91759	0.154372	0.125292	0.112487	0.153575	0.21589	0.162166	0.304833	0.452585	0.404269
cg13738327	LRP5	CTCACCCAGGGGCAACGTGAAGAAAACGTGAAATTCTGTCGCTTGTTGCAGCTGACAGCA[CG]GCTGTGAGGTCCCAGTGGGCAGAGGCCTCGTGCAGGGCACCTCACCAGCCGGGATGTCAG	0.746608	NA	0.708135	0.656678	0.793101	0.947164	0.955958	0.965517	0.977015	0.929374	0.768419	0.765735	0.695345	0.781185	0.955588	0.948489	0.938442	0.945309	0.953732	0.941676	0.941444	0.944824	0.937706	0.935734
cg03238581	CSPG4	TAGTCCCAAACAGGAGGAGAAAGGGCAATGTTACTTAGCTTCCGGTGCCTAGAGGATCTG[CG]TGTTCTCTGTCCAGTCCCAATGTTACCGGGCCTTGGTTTACTTCCTCCATTCAGGTCCCT	0.456243	0.599534	0.527145	0.490193	0.455683	0.896454	0.759743	0.858137	0.7958	0.35332	0.626032	0.52474	0.511727	0.562063	0.543273	0.78346	0.796611	0.823774	0.828671	0.815423	0.801862	0.753867	0.692185	0.75491
cg24810473		GCGTGTTAGAGCCCGGGGACAGAGGTATAGCCTAGCGCACTGGTGCCCAGGTGCGCCATT[CG]CGGTTGGGACCTGGCAGAGTCATATGGCTGGGGCCTGAGCCGCGAGCAGGGCGGAGCGGG	0.159877	0.271426	0.200531	0.181906	0.183082	0.333902	0.552384	0.464924	0.537339	0.573041	0.224946	0.212895	0.157498	0.182659	0.521789	0.060814	0.0556705	0.0384222	0.0496816	0.0552517	0.0450626	0.0511307	0.0491325	0.0425758
cg02733994	EIF2C2	GAACATCTGCTCCTGTCAGCCGGAGTGCAGACAACTGTATGCTGTCTCCCATGCCAGGCC[CG]GGCCACCAATGAGCCCACGGTGAGCCGAAGTCAAAGCCTCACCCAGCCCACGTTCACAGA	0.613617	0.575119	0.563223	0.445058	0.526772	0.795962	0.804016	0.65617	0.736183	0.707919	0.597844	0.576237	0.449827	0.563501	0.498197	0.787246	0.788454	0.80904	0.810734	0.805653	0.805053	0.812683	0.741349	0.821824
cg18836486	KDM4B	GTCCCCTCGCCACCCGCAGTTCCAATCCAATACTTTTGTTTTTTGCCTTTTCAGCCTCCT[CG]AGGTGGAGTGCCGCTTAACCGGGAGCATCCCCACTCCTGGCTTTCTGAGTGTGTCACAAG	0.483017	0.509934	0.433615	0.434325	0.332498	0.808	0.626886	0.786262	0.758898	0.838898	0.482357	0.446753	0.411944	0.40354	0.862536	0.705344	0.730467	0.686739	0.727061	0.700583	0.701397	0.704783	0.655522	0.687445
cg03279522	AGAP1	TTCTGGCCTCCAGGGCGGTCTGGGTGGGAGGAGGAGGTGGGCGGCCGGAAGGTGGTTGAG[CG]TTTCCGCTCCACTGCGCGGCCCCGGAGCCCCCAAACGCAGGTCAGCATGGAGGGGCAGCC	0.655058	0.595983	0.72609	0.734	0.612909	0.930301	0.910658	0.928334	0.844476	0.824551	0.606187	0.715637	0.726406	0.588891	0.922064	0.900888	0.888922	0.913101	0.89191	0.89379	0.88624	0.893586	0.877498	0.889368
cg08065122	SLC25A22	CCCTGCCTCCCCCACCGCTCCCTGCCACGACTCGCGGGCGCTACCCAGGCCTGCCCATAT[CG]AGCCCAGCCGAGCCAAACCTCACCCCGGTACATGCCGAAGTAGCCCTCGGAGCGGACGGT	0.666027	0.57259	0.605081	0.646124	0.49191	0.801509	0.784239	0.80361	0.839485	0.494814	0.554526	0.626007	0.636771	0.534726	0.50485	0.857211	0.864081	0.848496	0.833044	0.854729	0.838662	0.849459	0.81558	0.861827
cg20478261	BAIAP2	CCACAGCGTCCTGGCACCCGGGAGGCCCTGTCACTGCTCACACTGGAGCGTCCTGGCACC[CG]GGAGGCCCTGCCACTGTGCACACCGGACACTGCGCTGGACATTCTCTGTGCTCAGCCTCG	0.559401	0.702397	0.545493	0.449626	0.556058	0.876013	0.842177	0.717729	0.858106	0.917995	0.662899	0.554732	0.468346	0.619714	0.901426	0.88323	0.895586	0.899525	0.869096	0.880751	0.876724	0.883816	0.872873	0.871011
cg08695357	RGMA	CCCAACAATTTATTCTGCAGCATCACCGAACGGCAGCCCATTCCAGCGGCCACCGGGGCA[CG]CTAAGCAGGCACTGTGCCAGGCTGCACAGAGGTGACCAAGTGGCCTTTCCACTAATTAAC	0.56919	0.695538	0.678015	0.58656	0.692329	0.872777	0.77509	0.845824	0.926738	0.902696	0.703853	0.710179	0.553133	0.719162	0.890345	0.855903	0.880333	0.888071	0.86328	0.883736	0.843427	0.865156	0.846075	0.868728
cg16733298	ITPRIPL2	TGGGAAGGTGTTTGGAGGAGTTGGTGCAGTTCCTTAGGGACTGCCTGCTGCGACGCCATA[CG]CTCTTCCACTGCGTCCTGGGCCCTGGTGGGGCGGCTGCCGAGGTGGGTCCCCTGCCCAAG	0.718837	0.658835	0.603096	0.640534	0.592387	0.911379	0.908589	0.919855	0.881315	0.920161	0.622992	0.643814	0.630596	0.605658	0.921088	0.861922	0.852465	0.850937	0.853316	0.859479	0.83672	0.862704	0.80009	0.84372
cg17227257	LOC100130872-SPON2	CATGCGCACACGCACACGCCGCCCGCCCACCAGGCAGACACCCACACACCTGTGCACGCA[CG]CGCACGCCAAGCCAGCGGGCCCTGCCCCTGCCCCGGAGCCCTCAGTGTCAGAACCAGGCT	0.300966	0.57856	0.324147	0.185469	0.390958	0.777986	0.840655	0.818223	0.857865	0.689519	0.537955	0.404387	0.197428	0.488199	0.836416	0.862278	0.852534	0.850152	0.853387	0.892028	0.880027	0.893249	0.853234	0.833955
cg04261556	ITGB8	ACACATACACACTAGTAAAATGACCAAAATTTGTGTTAACACAGTATATTTTGTTCCCAA[CG]TACAGGCAAAGGAAAAAGTCCTACTTGCCTCTAAAATTTACTATTTAAAGTACATTTTTA	0.454395	0.589387	0.422596	0.332072	0.495627	0.67604	0.730077	0.81183	0.654633	0.645047	0.691937	0.396127	0.352977	0.594846	0.752292	0.832847	0.799935	0.759167	0.794703	0.819522	0.772392	0.850234	0.75612	0.805001
cg05625559		TGATGACCTGCGATCTGGGGAAGCCGCGCCAGGGCTCTGCGAAGCTGCGGACGAGGGAGG[CG]TCAGTGTGGGGGCTGCAGCTCAGCTCCGGGGGGGACGCGCCTTTCTCCACGGGACCTGGG	0.538477	0.589364	0.620247	0.399689	0.461815	0.776974	0.770789	0.83774	0.828315	0.45767	0.611031	0.709877	0.442825	0.407369	0.458098	0.865958	0.843925	0.859332	0.838376	0.859169	0.828604	0.862333	0.80675	0.864963
cg04637967		CAGTCTCTGGCTGCTGGGGACCGGCGAGGGCTTTCTGTTTTGTCAGGGGCACAGGGGCTC[CG]GTGGGCAGCTGGGGCAGAAGGAGCACCAGGAAGGAGCCAAGAGGTGCTGGGCTCCTCCAC	0.627947	0.606553	0.599571	0.609914	0.543771	0.829858	0.853631	0.845132	0.889173	0.74022	0.628986	0.606876	0.635605	0.562225	0.643717	0.717003	0.685164	0.738816	0.7047	0.706834	0.689023	0.73032	0.698123	0.732616
cg26461417		TCCTCAACAAAAGAGAGCAAAACGTAAAGAGGGGCAGAGTCGCCCAGAGGTGAAGGTCGC[CG]CCGCGTTTCCAGTGCTGCTTTGACTTGCTGGTTTTTATTGCACTACTTCATTTCCCCTCC	0.409883	0.494092	0.44502	0.314333	0.328719	0.571758	0.823386	0.713755	0.816353	0.390074	0.536476	0.446081	0.350296	0.372982	0.533373	0.146603	0.136277	0.133312	0.133143	0.147706	0.133531	0.139783	0.138001	0.12585
cg08973688		GCAGAGGCCATGTGAGTGGTGGTACTCGCAGCACAGGTGGTATCCGGCAGGTAGGGAGCA[CG]GGGGAGGAGGAATGTGCCCGGGGCCTGGGCAGGATGCCAGTGGACAGTCCCAGCAGCCCC	0.588828	0.580143	0.494298	0.495114	0.594964	0.772725	0.669424	0.800338	0.771934	0.647892	0.58979	0.509143	0.514733	0.554496	0.485589	0.735448	0.73989	0.741042	0.752181	0.752375	0.732465	0.75829	0.712678	0.741276
cg25464702	ARHGEF4	CCCCGGCCCCTACCTGGGCGCTGCGTTCACAGAGGCTGCCGCGGGCGCCAGCGCGGACAG[CG]GGTGGCTGGTCCCAAAACCTTCCACAACGCCTGGGCCCCAGCTCCAGCCCTCTATCTGCC	0.585406	0.679312	0.703362	0.620811	0.606608	0.87713	0.861934	0.865694	0.845318	0.739624	0.698965	0.721826	0.62033	0.620657	0.525395	0.779198	0.699745	0.687235	0.762541	0.817564	0.723281	0.838778	0.79407	0.837989
cg02975463		CACACTCTTTTTGGAAAAGAAAAGGGCTTTAACCTGCAGGAGTCTAACCCGTCAAGACGT[CG]AGGACCTTTACAGAATGTGCTGGCAAGAAAGGAGAGCACAGGCAAGTCACACACACATGC	0.405209	0.578932	0.467304	0.369907	0.406301	0.722302	0.804805	0.720798	0.817729	0.626088	0.559252	0.471471	0.377728	0.467354	0.829208	0.173568	0.190973	0.187824	0.183524	0.207514	0.201134	0.162093	0.178095	0.129512
cg04083553	GP9	GGTGAACACCCAAATCCTGCCCTACCCAAATCCAGAACCAGGAGGCGGGGAGAGAACAGG[CG]GCCTCCCAAGGAAGGACTCACCCTGCTTGGCCATGCAGGAGGAGGAAGGCTGGCCTGAGA	0.46352	0.611975	0.44349	0.351249	0.521929	0.714424	0.775809	0.806718	0.696155	0.594659	0.597332	0.427772	0.36794	0.559798	0.510495	0.850161	0.789407	0.832253	0.824344	0.79799	0.806972	0.819519	0.799955	0.811329
cg03743678		TCAGCGCCTGGATCCTTCCAGGGTCTGTCTATGCTCAGGGCAGCCTGCGTGCAGCGACGC[CG]CCTCCAGAGCGCACCCCCTGGGCGGGAGCCAGGAGAATAAGGAGAAAACCTGAACAGGGC	0.533873	0.588714	0.716772	0.570135	0.663765	0.855983	0.828989	0.922621	0.928437	0.659931	0.602614	0.74522	0.568419	0.602067	0.58348	0.830044	0.833372	0.845484	0.867156	0.852194	0.85084	0.890235	0.84888	0.887637
cg11592082	MAP3K6	TTGGGAACCCCAGACCCCAAAGTGCGGGGGTAGGGTGCCCGGCTCTGGGCAGGCCCCAGG[CG]GTGCCGGTATGGGAGATGTCCATTTAGTCACGCCCCCACCGGCGCCTGCCTGCCCCTGTC	0.577365	0.711942	0.623479	0.575698	0.632236	0.822086	0.869646	0.861401	0.850259	0.85699	0.721484	0.652896	0.58091	0.650333	0.884469	0.819793	0.73543	0.76885	0.830135	0.806112	0.777558	0.826562	0.799647	0.840686
cg10168494		GGAACTCAGAATGCAGAGTCAGTTTCACAGACACCAAGTGACCTTGTGCAAGGCACCTCA[CG]TATTGCCTCGCCTTCTTGACACCCCCTAATGAATGGTGACAGCGACACGCCCCAGCCGGC	0.449596	0.630361	0.4231	0.409767	0.49708	0.836733	0.746072	0.648841	0.871771	0.845627	0.620649	0.466042	0.393932	0.574797	0.861073	0.762656	0.769274	0.775473	0.742951	0.76811	0.742378	0.813325	0.778559	0.782574
cg02800733	CD320	GGAGCTGCCTGGGGCCAGCCCCTCAGTTCTGGCTGTGGCAGGTTCCCCATCCTAGCTCCC[CG]GATCTCCATAGGGAGTGTCCAGGGACCCTCAATCTCCAGGGCCACTTCTGCAGGAGCTCG	0.49923	0.644932	0.50655	0.434137	0.524454	0.816399	0.801847	0.788631	0.787044	0.832956	0.565564	0.531999	0.420947	0.601214	0.826104	0.764997	0.753025	0.789163	0.768757	0.781574	0.770823	0.793785	0.771637	0.795803
cg19741167	POLR1A	AGCCTCCCGTCCCACGTAAATAATTACAAACAGAGCACATGACCCCTGGCGGTTTCTGAA[CG]CGCCTGGCAACAGCTCCACCACCTGCTGTTTGGAAAGTCAGATTCACAGAAGCTACAATT	0.330654	0.474998	0.42638	0.395422	0.368007	0.86067	0.688951	0.754548	0.550784	0.356167	0.472756	0.436564	0.396271	0.423493	0.444633	0.746595	0.732533	0.746588	0.757601	0.71084	0.740314	0.725564	0.600213	0.620525
cg17823346	ZMIZ1	GCAAAACTCCCTGGGCAGGGCCAGGGGCTGGGGCCTCATATGCACTGCCTGTGCACCAGG[CG]AGTCTGTGGGCAAATGAGCTCCAGCTTGCCATGGTGCTGGGGGAGGGCCACCCTTCTGCT	0.509314	0.592921	0.464003	0.576662	0.543511	0.803548	0.685401	0.819453	0.745424	0.815782	0.581692	0.495292	0.589357	0.572515	0.610395	0.731554	0.744082	0.741393	0.726454	0.741459	0.746905	0.744317	0.696803	0.76457
cg26800771		TGGGCCCACCCCGCAGAGGCCCCGGGCGGGAAACGGGCAGGCCCAGAAGGACCCACAGGT[CG]CGGAGGGGACGCCCTGCCTGTACCCGCCGGCGCAGGTGGCAGCGCAGAGTCCCTGGGAGG	0.542101	0.679756	0.550621	0.438128	0.530986	0.890818	0.887207	0.735442	0.754143	0.912289	0.670815	0.565988	0.425166	0.588102	0.914178	0.240223	0.241699	0.269301	0.282497	0.302656	0.266438	0.231526	0.280003	0.223028
cg23460250		TGGTTTGGGGCTCAGAGGGCCGCGCGTGTGTGGCCTCTGTCTGTCCGGGGATGGGGTGGG[CG]TGTTTGGCTTTCGAGGTGGATTCGTGCTTGTGTGAGAGGGTGTGTGTTTCTCATTCCTGG	0.721348	0.503265	0.606492	0.690329	0.643094	0.922247	0.919492	0.910285	0.86013	0.722862	0.486251	0.604057	0.71311	0.397533	0.907147	0.929303	0.931472	0.890224	0.897975	0.917745	0.917695	0.95633	0.925364	0.904661
cg07132686	SDCCAG8	ACCTTGTGCAAGTTACTTCACCCCTGGGTGAGTCAGTGTCTTCATTATAGGAGAGAAAAA[CG]GAAAAGGTCCCACCTCATAGGGTTATGAGGCTTAAATGAGCTTAGCATTTGCCTGGCGTG	0.463625	0.595274	0.52185	0.462132	0.452229	0.820973	0.841556	0.864142	0.840635	0.841001	0.58449	0.490167	0.496832	0.544531	0.861862	0.695705	0.67736	0.679481	0.695648	0.697122	0.673876	0.715156	0.695366	0.712777
cg07734358	TBC1D22A	GTGGGTGGAGGGAGCTGGATGCAGGCTCAGCTCTGTTCCTCCGTGGGCCCCCTCGTGGGT[CG]AGGTCCCGTGTGGCTAAGTCTCCTTGTCTTTTGCATGCTCGGCGCCGCCCAGAGGCAGAG	0.321302	0.612097	0.424476	0.193929	0.356356	0.711666	0.863923	0.690569	0.868148	0.615369	0.610294	0.379325	0.216581	0.479016	0.631541	0.916274	0.91552	0.908387	0.917435	0.92147	0.929105	0.935706	0.883389	0.902255
cg08329754	RPTOR	TATGAGGTCGTATAACTGCACTCCCGTCAGCAGCCCGCGTCTGCCGCCCACGTACATGCA[CG]CCATGTGGTGAGTGTTTCAGGATCCTCCAGGTGCCGTGCTCCCCCGCCCTCCGTGGCACT	0.441838	0.598656	0.445894	0.340828	0.477671	0.746086	0.763672	0.760716	0.612922	0.795481	0.576197	0.461673	0.361596	0.545423	0.715398	0.805943	0.818554	0.829807	0.796838	0.819245	0.812934	0.818637	0.743156	0.81306
cg17185060		ACTTTCCAACAGAGGACGGACTGATCCTTGGCCGGCACACCTCCGGTCACTAGAAGTGTC[CG]TGCTAGATTGGACACACATGGTTGTGGGGAGGTGATTCTGGAAAGGAGATCACGAGTTAA	0.416015	0.651504	0.380955	0.268781	0.40979	0.936322	0.918689	0.92471	0.915912	0.405004	0.59918	0.350009	0.261905	0.551864	0.704124	0.932477	0.912361	0.893541	0.939362	0.903404	0.912198	0.91835	0.872269	0.918819
cg09141835	CBFA2T3	AATTAGGATCCTGTCAGCTGCCATTTCCTGAGCCGTACATCCGCGGTGCCGGGGGACTTG[CG]GCTGCAGCTCCCTCATTTGAAGTTGCTTCCTCGGCGGCACCTGGGACGCCCCCCATATGC	0.502238	0.679347	0.538844	0.440253	0.592132	0.88534	0.882921	0.836773	0.858324	0.870206	0.685814	0.526308	0.458129	0.630051	0.797737	0.89065	0.890211	0.901565	0.895541	0.882863	0.888624	0.884061	0.835776	0.87631
cg06568323	PCCA	TGCCCGCAGGAGCCATGCTGAGGTGCTGGGTATCAGTGGCTGGCTTTTGGGCCAGGGATA[CG]AGGCTAGAGTTAGAGTTAGAACTGTGAGCCCTGACGGATATAGTGAGTCAGTTAATATTT	0.631805	0.669462	0.48906	0.560473	0.59084	0.884086	0.853914	0.863884	0.865366	0.48337	0.643966	0.512655	0.579089	0.600816	0.841916	0.825552	0.817553	0.822353	0.831241	0.829412	0.797736	0.82879	0.822082	0.821114
cg25375916	SLC33A1	ACTCTTTTCCCATAGTAATTAAAGAAAATCTTACTAATTTAGTCACAGCCTTTCTCAGCA[CG]ATTTCCCAAACCCAGTTCCACAATTTAGGCAATGTCCTGTACTTTTTTGTACTTTCCTGC	0.553366	0.430897	0.293316	0.272878	0.322075	0.817273	0.582377	0.732818	0.802118	0.459902	0.368567	0.35206	0.247398	0.39505	0.2887	0.806837	0.798757	0.824217	0.806856	0.837726	0.798089	0.783338	0.74414	0.807279
cg09981929		CTATCGCACAAAATGGGCGCTAGCGGGGGTCATTCTAGTCCGGCTGCCTCACTCTCCCGA[CG]GTCCTCCAGGGTGGCACCATCACCGTTCTCGCCCGCCTCCAGCCGGCCCATTCCTGCTGC	0.398146	0.519127	0.598424	0.543947	0.550048	0.902272	0.695184	0.943072	0.904745	0.694337	0.455566	0.599184	0.555226	0.484642	0.293576	0.380434	0.407056	0.488019	0.258172	0.32134	0.187764	0.761913	0.945731	0.963556
cg08083599	COL20A1	ACAGCCTTGATTTATCAGCATATGATATACATAATGGTTGTCTCAGCTGTCCCCAGGCAA[CG]CTAGGACCTTAGAACATCACAATAATATTTATCCCATTTTCAAGCACTTGTGTTTATTTA	0.642477	0.637977	0.653489	0.557141	0.590419	0.87739	0.806239	0.866063	0.887739	0.664642	0.641791	0.651854	0.58301	0.567147	0.154845	0.835078	0.825408	0.81801	0.832984	0.809675	0.803972	0.79539	0.740143	0.799035
cg11401784	FBLIM1	GTCTACACCGAAGGCTGCCATCTGCCATCTGCTTAGTACTTGTCCTCTCAGAGTCATCCT[CG]AGCGGGTCCAGGACCCCCTTTCTGCCCACCTGCCCTGTGGCCTCGGGTCCCCCTGCTTCT	0.579032	0.613412	0.484117	0.476811	0.422348	0.696935	0.780876	0.70466	0.757229	0.713011	0.599521	0.516901	0.470758	0.468548	0.651534	0.810882	0.793188	0.761892	0.783232	0.795126	0.786526	0.801252	0.763675	0.794288
cg20170147	SOX5	TACAACATGCCATTCAACCAGAACTGTTTAAGCTCAACAACAAAACTAATACAAGCTTTC[CG]TATTAAGAATTGAAGTTTTTCCTGTATTAAGAGTTTACACTTGCAAGTCTGTGTCAGATT	0.365309	0.639674	0.469582	0.394279	0.455359	0.820128	0.871791	0.851771	0.704793	0.870727	0.653548	0.467912	0.457939	0.601041	0.807599	0.779233	0.802524	0.82964	0.811863	0.798719	0.805698	0.840547	0.801904	0.84725
cg15151778	BOP1	CCGGATTCTCCAGGGTCTCCAGCACCACCCGCAGTGTGCGTGGCCTGACTGAGGAGGGGT[CG]GGCCCGATGGAGCACGAGAGTTGCGTGAGGGTGAAGTAAAAGCTGAGAGAGTGGGCGGGC	0.721508	0.597829	0.680528	0.534785	0.480034	0.941624	0.919733	0.85719	0.946202	0.950661	0.618799	0.675559	0.523003	0.575911	0.950071	0.944305	0.946968	0.939477	0.923485	0.940217	0.933945	0.944298	0.935749	0.940491
cg13050802		AATACTGATTTAACCGAAACTGTGACAAACCTCATCAGCCGGGCAGGGATGCGTGTGGAG[CG]AGCCGCTGGCCAAGTGCTGCCAGATGCCCCAAGTGACCCAGAGAAATGGTCATCTGGATT	0.577874	0.657844	0.594395	0.535832	0.706535	0.870687	0.884659	0.856031	0.793435	0.68046	0.644719	0.605869	0.53111	0.642553	0.894772	0.872005	0.841887	0.872501	0.852056	0.858894	0.840761	0.866542	0.835359	0.839885
cg12309668	SORBS2	TATTTTTATGCTGTGCTTTCAAAAAGGTCAAAAAAGCTTACCTCTGTCAGTGTACTGGGA[CG]CTCAGGAAGCCCCTTCTCCGCCTCGGCCTCAGCGTGCAGACATATGCCCTGGGAGCCCAC	0.306209	0.485807	0.505549	0.45898	0.313758	0.597356	0.841634	0.824493	0.867499	0.422497	0.53517	0.483875	0.479801	0.34686	0.212344	0.795685	0.805732	0.766032	0.843382	0.816198	0.798032	0.831103	0.700043	0.807364
cg06094523	SLC2A1	ACCCAGCCACACGTATAGCAGAGTGCAGGCCCTAGTTACCCAGAAACGGCTTCTTATGCA[CG]TATACCATCACACACACATACCCGTGCTCATAGAATCTAAATATTCCTGCTTTAGCCAGT	0.499849	0.538665	0.463582	0.437399	0.399782	0.693266	0.676439	0.699762	0.716778	0.740518	0.532163	0.503687	0.447411	0.441305	0.763274	0.659908	0.642306	0.632912	0.64425	0.682668	0.658806	0.687501	0.632359	0.670339
cg03139489		AGCCTGACCACAGAGTGACACACGGGGGCTACAGCACACGCTGCTACTCCAGCAAAATAA[CG]GGCACAAATGACAGCTTTGACACGACAGTAACCTCATGGCTTTAAGATGACTCTGACCAC	0.594999	0.528702	0.506831	0.288685	0.439805	0.870366	0.826718	0.875139	0.665773	0.878467	0.495199	0.524413	0.273714	0.438735	0.871809	0.847057	0.864083	0.846742	0.850675	0.854867	0.847966	0.875945	0.8516	0.866126
cg18048953		TCCTTCAGGGACTCCATAGTATTTTTTTTCACGCGTCGTCGCTACTACAGCAGACGCCTG[CG]TTCTCATTATTTGCTGTACAGATCTCCGGTGCCTTGACTGTAAACAAAACACTTTAGATC	0.538384	0.472027	0.529876	0.511785	0.48679	0.873565	0.800285	0.801971	0.609401	0.345662	0.471415	0.528478	0.520196	0.460351	0.361	0.432419	0.456838	0.429093	0.494461	0.49462	0.455326	0.408761	0.395952	0.413623
cg22664614	CPA5	TTAGCCAGGCCTCTGTTTTGAAGTTTCCATTTCCCTGGTTCAGCCCCACCCTGGGAACTC[CG]CAGCATTTGGCAAACAGACACACAGAGGTCTCTAAAAACTTTCTGTTGATTTCTGCACAT	0.470996	0.651675	0.479556	0.481348	0.584121	0.878065	0.776702	0.740548	0.720465	0.709458	0.652226	0.520378	0.529776	0.553	0.820398	0.816135	0.822952	0.854679	0.826052	0.850277	0.829112	0.837174	0.795328	0.801325
cg12853648	BAI1	CGAGAGCAGGGCGCTTGCTTTCGTTTCAGCCTTTTAATTTCACTTGCAGTCAGCCGTCCC[CG]CACCCCCTCGGGCGCGCCCTCAAGTGTGCCGAGTGTGGAGTCCTCTCTGCCGCCGATGCC	0.46013	0.537712	0.460778	0.347897	0.400746	0.6032	0.697318	0.735334	0.706987	0.609068	0.479042	0.465946	0.313773	0.412866	0.322183	0.745282	0.773444	0.779165	0.764844	0.788372	0.735979	0.663098	0.735632	0.802649
cg14165772		ATGCGGCTCGCAGATGTGTTTCCTGGTGAACATCTGGGGTGGGGCGGCGTCGGCTCTGGG[CG]TGGTGCAGCCTCACTGTGCGGGGAGCCCTACAGCTCAGGGAGCGGCCCTCGTGTAGGCCT	0.602796	0.723267	0.550541	0.518021	0.584284	0.83725	0.812455	0.915907	0.897319	0.599019	0.713542	0.556441	0.512366	0.650933	0.604092	0.880964	0.879477	0.905047	0.899169	0.879337	0.87578	0.861335	0.843905	0.897994
cg08705647	FSTL4	TGGTAAGGAGGGCATGATGGAAAGCCGGCGTGGAGGGAGAGAGGAGGCACGCGCGTGCAG[CG]CCGTGACGTGCATTTAGTTACACGACGGCTTCTGGAGGCCCACAACTGATTAATATACAC	0.402044	0.669235	0.347727	0.329871	0.372785	0.873656	0.909711	0.892327	0.751486	0.388988	0.581989	0.360063	0.332877	0.506197	0.652416	0.900065	0.889465	0.871635	0.893241	0.905276	0.899877	0.899351	0.88154	0.89681
cg12124955	PFKP	AGTGGCAAGCAGGAAACTGTTGTGTGGATTTTCCACACTACTCATTAGAAACGCAGCCAG[CG]ATGTCCTGCCCTGTGTAACCTACGGATTCACGAAGTGTCGTGGGGGCCACAGCGTTTGAT	0.448906	0.690395	0.502099	0.447071	0.579453	0.842242	0.87745	0.836536	0.712076	0.901086	0.687869	0.499153	0.485961	0.643782	0.901878	0.872911	0.893105	0.875682	0.876732	0.88319	0.883115	0.890298	0.863664	0.888161
cg02131142	TBC1D9B	CAGCTGTCTCTGTCCTTCTTCTGGTACTTTGGGGGCAGTAACAGGGCAGGTTGGAGTCAC[CG]GGTGCCCCACAGAGGAGAGGTGGGACTTGGGGTCAAGCACAAGCTGCGAGGCAAGGTTTC	0.639955	0.670078	0.548598	0.455951	0.538748	0.857791	0.747011	0.828591	0.847741	0.581825	0.647261	0.582609	0.443439	0.610495	0.835371	0.842173	0.856598	0.849923	0.849167	0.868998	0.864178	0.850302	0.857761	0.869883
cg16122424		GGTTGGAGGGACAGAGGGAAGTGTGGGAGGAGGCAGGGAGCAGAAATGCCGCGCGGGCTG[CG]GCAGGAGGGAAATAAGGAAAAAAACAACTAAGGGCAGTGAGACAAGGCCACTTCCCAATC	0.581852	0.514999	0.509162	0.608333	0.529931	0.840301	0.820315	0.864968	0.866682	0.849796	0.491463	0.553509	0.600587	0.50683	0.889637	0.753901	0.720463	0.710616	0.751423	0.721206	0.733568	0.683704	0.711545	0.728578
cg16293838	ACOT7	GGGCACTGGCCAGTGGTGCCAGCTGCCGGGCACCCACCTGTGGCCTCAGGCAGGCTCCTC[CG]AGCCTCTGGGGCTCCCCAAGAATATGCCAGAGAGAAAGGATGAGGTGGCAAAGGGCAGCT	0.426383	0.548502	0.414628	0.353193	0.512877	0.732784	0.739114	0.698472	0.747087	0.584753	0.529036	0.443002	0.375846	0.564114	0.736213	0.73531	0.729373	0.71557	0.733058	0.749725	0.723295	0.746363	0.701934	0.715683
cg12371924	BCAT1	TTGCTGCATGCTGAGAGGACCACGGCACAATCCTGCCCAAAAGTATACATGTATCCCCCG[CG]GCTACTTTAAATGTACTTTTGCAGTAGTCAAGAACATGTGCCTGGTTTGCCGATCTCTTT	0.654719	0.655351	0.676214	0.61915	0.725979	0.880085	0.881357	0.883902	0.858475	0.671048	0.706644	0.695451	0.599641	0.716171	0.667176	0.515937	0.545123	0.516107	0.483331	0.492604	0.467796	0.453963	0.516748	0.370314
cg00341060		GAACTTTGCCTTGTTCTTGCGGCATCCCCAGTGCCTTGGACAGCTCCGGGCCCAGAGTCG[CG]ACGCCTCCAGCAGGCCCGGCTGCCCCACTGCGCACATGGGCACAGGCTTGGCACACGCAC	0.504469	0.594933	0.485162	0.325618	0.468268	0.664603	0.922986	0.838542	0.904464	0.922723	0.598456	0.524383	0.308425	0.504501	0.945439	0.713737	0.707888	0.802717	0.768701	0.75836	0.695027	0.788711	0.795426	0.83325
cg02273944	SPATA20	GTGATTTCCTCAGGGAAGCCTTCATCCTTTGCCCCTTCCACCAGATCAGGTCACTTGTTA[CG]TTATACCCTCACGGACTTGTCACGTGGGTGTTTATCGGTATGGCTGTCGAATTAGCATCT	0.668139	0.618782	0.679026	0.722304	0.648176	0.879123	0.847175	0.891571	0.874806	0.639109	0.624197	0.698385	0.717395	0.598567	0.308852	0.796327	0.800291	0.802363	0.822794	0.814146	0.795491	0.835927	0.799128	0.793588
cg19562439		ACCGTCATGAAATGTCCTCCCGGCCCTGCTGCTTGAGCTACTCGTGGGCGGGGACCTTGT[CG]GTGTATCACTGCTGTTTCCCGGTACCTGCTCAGAGCAGGTGCTCCACAAATATCGAGCCC	0.587334	0.605513	0.618943	0.503901	0.502682	0.852436	0.768082	0.830144	0.868471	0.129614	0.60266	0.649853	0.522066	0.572161	0.17498	0.807431	0.806485	0.817472	0.811855	0.808108	0.818889	0.787028	0.731295	0.808603
cg22079102	KDM4B	GTGGGCTGGCGGTGTATGAAGTTCGCACGGATCCTCAGGGTGCTGACCCAGCCCCGGTTC[CG]GAGGGCCAGTGTGACGACACCTCGTGGCCCAGGAGAGCAGGGCGGGCCACCCATGGCCAC	0.490011	0.736291	0.640789	0.588305	0.528539	0.883627	0.861051	0.905037	0.904735	0.798165	0.73059	0.650317	0.614139	0.636592	0.705987	0.936322	0.931082	0.944482	0.943878	0.944699	0.92632	0.916681	0.9151	0.929291
cg25313204	SLC22A3	GGAAAGTTGGGTGATCAAATCCCAAGTTGTAGCTCTCGATGGGTCGAGGGCGATGGCCAG[CG]CTGTGCTGGGAACGGGCAGCCCTGCCCTGCCCTGCCCTGCCCTGCCCTGCCCTGCCCTGC	0.662775	0.734577	0.678165	0.64825	0.582231	0.868748	0.842443	0.871231	0.888482	0.870153	0.760364	0.689606	0.653389	0.636482	0.873278	0.386464	0.357718	0.391023	0.388706	0.41444	0.386903	0.485065	0.427129	0.475108
cg12911122	FOXP4	CCCCTGCTGCGAACCAGCCGGTAGGTGCAGGGGCCGAAGGCCAGGCCCAGTGGACCCAGC[CG]CCTGAAGGGGAGCCACGGCCTCAGAAAACCTCTGCCCGCCCCCGCGGAAAACCGCTGTGG	0.333014	0.39218	0.283803	0.319427	0.394933	0.49964	0.721813	0.759402	0.857637	0.583275	0.381146	0.329997	0.373276	0.359739	0.549691	0.0992329	0.104451	0.109596	0.117302	0.1173	0.113474	0.11099	0.201746	0.119217
cg27571196	PKP1	TTCTGAGCTGGTGTAAACGCGACCCGAGGCTGGCTCGACGGCCCCGCGAGCTCGATGGCG[CG]CTAGTGGGCAAGGATGGGTGATTCACCGGGACACAGCCAGGAGCATGTCCCAGCGTGCCA	0.653981	0.676802	0.676532	0.606944	0.74933	0.893187	0.873846	0.907023	0.854765	0.75731	0.638773	0.68524	0.598144	0.717624	0.525217	0.687461	0.571007	0.665287	0.725172	0.774516	0.692663	0.847213	0.835601	0.867234
cg11365710		TGGTAGAAGGCAGGCGGGATCTGGTTTCACGGCGAATTCAAAAGGGGCAAAGCAACGCGG[CG]CCTCCTGAATTCCTGGCCCTGCGAACGTCATGTCGTTAACGTGTTATTTATGGCACCCTC	0.544289	0.73664	0.687185	0.685201	0.614162	0.880254	0.916319	0.893675	0.91575	0.937857	0.736302	0.684598	0.685483	0.692629	0.918063	0.930747	0.905555	0.924195	0.933298	0.92218	0.920283	0.92457	0.887293	0.91167
cg23179181	CORO6	GAAAGGGCCAGCCCTCGAGCCAGTGTCAGGCCCCAGACCCTGGAAGATGCGTCTGGGTGC[CG]GCTGAGAGGAGAGGGGTCCAGGAGCTCAGGTTTCATGCAGGTTCTGGTGGGAGGATGGAG	0.507325	0.612872	0.568725	0.492149	0.488676	0.65767	0.903851	0.80762	0.87914	0.694536	0.591193	0.565702	0.503594	0.510114	0.897251	0.320555	0.311054	0.315709	0.315277	0.306898	0.336698	0.357635	0.346303	0.287419
cg02927448	UHRF1BP1L	AGCTTTCTGATGTTTGCAGGCAAAACAACTTTACTAGCACAGAACCCTAGCTCAATCATA[CG]ACACACACCTGTACACTTTAAGCTGGTTTCTCAATCTCGGAACTACTGACATTTGGGCAA	0.580638	0.517146	0.568709	0.611062	0.449444	0.840647	0.74053	0.792778	NA	0.874546	0.51588	0.608341	0.610242	0.489404	0.846917	0.782308	0.783611	0.786864	0.766524	0.775226	0.764142	0.762532	0.74174	0.788729
cg04049089		GTGACTGTGGGCGAGCAACTGAACCTCTCTGAGCCTGTTGTCTCATCTGCAAAACAATCC[CG]GGGCATTGCGGTGAGGGTGAAGTTGGGTCACGTAGATGAGTGGTGCTGCCCAGATCATCT	0.481446	0.639778	0.462909	0.359471	0.46002	0.844878	0.822809	0.795346	0.800085	0.720053	0.604769	0.49976	0.35945	0.530322	0.525894	0.840352	0.826384	0.827109	0.828596	0.846859	0.821942	0.816063	0.813886	0.815644
cg22675937	TBX2	CACTGTGGCACTGCTTTAGGCCTGTGTGGGGCTGTCTAGGCCTGTCTAGGGATAATTCCT[CG]AATGAAGCTTTTGGAGGACAGACCCCGTCGCTTTCCGCGAGGCCCTCCCACCGGCCTCAG	0.505978	0.587727	0.476597	0.450047	0.647722	0.868514	0.871508	0.793383	0.927668	0.910778	0.553587	0.491337	0.469598	0.540804	0.938517	0.299974	0.298735	0.291483	0.32268	0.288254	0.293353	0.276178	0.262174	0.227559
cg02705958		TCTCCTCACCAACACAAGCGCTTGGCGCTTCCCTTTTCCGTCCAGGCGTCCTGGCTGGAA[CG]AGGAAACTCAAAAGTGCTACGAAAGAACAAAAGTGGCCCAAATTCTGAAAATTCTTAAAA	0.669261	0.584797	0.72431	0.659287	0.554854	0.886529	0.855583	0.883839	0.869897	0.346221	0.608277	0.706991	0.650279	0.556126	0.600941	0.884386	0.849945	0.862317	0.839647	0.856881	0.857356	0.878416	0.855261	0.866677
cg08971217		CCCCCCGCCCCCAGCCCTCCCCAGCTGGGAACCACCCACTGCCCCTGCACAAAGAATGGG[CG]GAAACAGGAGTTCACCCCGTGCCATTTCTCACTGGCCGTCGGCTGGGCCGGACCTACAGG	0.523557	0.686077	0.621886	0.533547	0.524088	0.815298	0.748781	0.825605	0.751362	0.51006	0.646216	0.624285	0.514965	0.46846	0.296612	0.272215	0.259736	0.237721	0.298303	0.325013	0.292296	0.32984	0.351164	0.313252
cg19888509		GGGCGGCAGTGTCTGCAGAAGGAGCCACGCGGCCGCGCTTAATGAACAGTGACATCTGCT[CG]GCTCTTTAATTAACGAGCCCCCACGCGCTGTGGCAGGACACAGGGACCACGTCCTCTGTG	0.631819	0.662458	0.521566	0.40699	0.553838	0.794207	0.804296	0.954897	0.931258	0.850162	0.583722	0.545503	0.413299	0.567248	0.701264	0.93432	0.932833	0.949944	0.92902	0.926236	0.931402	0.930964	0.848567	0.951723
cg05552490		AGGGATATGGGAGCTGAGGCAGAAGAGAAACTTTGTTTTCATTCTCACTGCAGAGCTGAG[CG]TAGACTGTCTGGGGCCACTGGCTGAAGTGTAACTGCCCACTCCCCCGCCCCGCCAGGGCT	0.462223	0.617905	0.455241	0.489783	0.538902	0.812623	0.731499	0.822679	0.811003	0.629476	0.62787	0.496994	0.510869	0.588555	0.785443	0.785465	0.794116	0.7726	0.79309	0.77341	0.760946	0.760139	0.730679	0.728337
cg21187770	KIF3C	CCCCTGCTCCTGCCTTTCTGCCTGCAAATGGGTGCGCGTCACCCCTCCCCGTCAGGGTGT[CG]CCAGGCCTCCGGGAACCGAACTCCTAAATGTTCCTTGACTCTGTCCTTTCCTCCCCCTGT	0.268464	0.264409	0.226703	0.202404	0.207177	0.608285	0.526607	0.426789	0.516513	0.209708	0.264699	0.269641	0.223274	0.219936	0.295124	0.239585	0.220583	0.208845	0.201364	0.238453	0.2056	0.357908	0.461723	0.51059
cg26053697	COL4A2	GAAATGTGTAGGGACAAGGACCCATTCCAGGGAAGCCAAGTGTCGGCCGCATTCACCACC[CG]TCCCCTGCAGTCTCACACCTGCCCGAGGAGGCAGCCCAGCAGTCGGGGGCCCCGAGCTGG	0.478183	0.509917	0.579443	0.498338	0.672292	0.704884	0.78136	0.795412	0.746899	0.833613	0.548701	0.61987	0.569466	0.623796	0.850787	0.837444	0.819374	0.77504	0.828092	0.838529	0.821738	0.862736	0.790598	0.814781
cg10744200	CCDC149	ACTGCACAGCCAGCCTCCCTGTGCCAACCCACAAAGTGGATCAGTGCCTTGCACAGCACC[CG]CGCCGCCACCAATAGACGCATTCAGTTGCTGATTTAGATAGAAATAAATGTTTATGAATG	0.656404	0.829437	0.676305	0.626192	0.666732	0.953295	0.930342	0.948808	0.945234	0.952583	0.846203	0.738043	0.665761	0.716055	0.93388	0.955475	0.950676	0.956767	0.962014	0.972538	0.953355	0.966129	0.949671	0.946818
cg01686884		GGAAGCTCTCATTTATGAGAGGGACCATGATGGACCACGCGCCATTTATGAGCTGCTCAC[CG]CGGACAGACCGTGTGTCCAAATCGGGGCCTCCAGGGCCCAGCGAGCTGCTCTGACCTCCG	0.534528	0.49602	0.513671	0.529731	0.441949	0.80633	0.711402	0.605666	0.823245	0.47203	0.488954	0.540669	0.507997	0.469277	0.453747	0.676998	0.666276	0.741699	0.783426	0.740974	0.679867	0.778825	0.731529	0.634394
cg03685774	CCDC19	GTTTTCCCCTGGGACTTCACCTAGGTTGCTATGATTACTCTTGCCCCATTGCCCAGGAGG[CG]CCAAGCCAACCCCTGATGAGTGTAGTCTGCAGAGAAGCCAGCAGGATCAGGACAAACCAG	0.697361	0.706629	0.65424	0.641143	0.629081	0.899101	0.804949	0.874108	0.896682	0.816818	0.714089	0.663985	0.680045	0.640673	0.560038	0.371557	0.353643	0.373368	0.406005	0.364974	0.352451	0.327583	0.471834	0.489444
cg12843453	BRD9	CAAAGTGCCCCTGACGGGCTGGACAGGCCTAGTGTGCACCATCCTTCAACACTGTCCTGA[CG]TCATCATCTAACAGCTCTTCTAAGACTGCTTTCCAGATTCAAGGAGCAGGGTGGGCCAGC	0.545948	0.635005	0.673163	0.606916	0.616977	0.859204	0.742073	0.82682	0.838989	0.868805	0.670725	0.675525	0.621319	0.610326	0.851195	0.80689	0.78557	0.781288	0.771223	0.807465	0.766555	0.788036	0.753266	0.791215
cg00764668	KCNN1	CCCCATTAGTGGCTGGCACCCACCTGGAGCGTGTGGGCTGTCCCTCTCTGTCATTGGTGT[CG]TGGTATCGTCCTTTCCTCTCTCACTCAGCGGCGCCTCTCTCCTGCCCCTCTCTGTCTCCC	0.51338	0.554685	0.551911	0.399526	0.487126	0.845043	0.676564	0.79699	0.68928	0.847953	0.569766	0.542145	0.394849	0.499991	0.907484	0.715757	0.717104	0.71138	0.747686	0.751349	0.724939	0.763452	NA	0.783062
cg22905866		CCTAGCCCAGGGCAAGTACAGTACTCTAGGAAGTAGTACTCGGGTGGGGCTGTTGGTAGC[CG]GGGGTGGTCATCTGATTACCAGGGAAATGCAGAGTTTATTTTATCTAATTACCAGGGAAC	0.520106	0.630956	0.466056	0.330039	0.548827	0.807067	0.845621	0.873878	0.901723	0.877494	0.61027	0.467509	0.345955	0.601676	0.850323	0.869658	0.873906	0.885343	0.87221	0.867772	0.889303	0.874365	0.840649	0.893042
cg20989942		CTGCGTGGGACCCACCGAGGAACTTGCCCAGCCGCGTGCATGGTAGCTACGATGTGGAGA[CG]TTGACGGTTTCCATCTGCCTTGAATTGTGATGCTGCCGGTCAGGGAGCAGCTCTGGGGGA	0.657705	0.636161	0.603515	0.568908	0.581623	0.793842	0.788129	0.814441	0.854065	0.738856	0.614664	0.634386	0.574903	0.606996	0.513215	0.763851	0.765428	0.77018	0.762813	0.771958	0.764623	0.79962	0.720707	0.772887
cg05300029		CTTCACCATGGCCAGTCACTGGTGTTTCTGACTCTGGTTGCTCGTCCCTTCAATTAATTC[CG]CAAACTCATCAATGTTTGGTGAATTTCTATTTTCTTCTACTAATCTTCTCACCTGCTGCC	0.627961	0.573141	0.64401	0.606223	0.59509	0.912163	0.781719	0.82685	0.918072	0.898465	0.562171	0.637803	0.554723	0.61887	0.907502	0.777223	0.759204	0.760868	0.714878	0.763163	0.731283	0.752629	0.698727	0.780119
cg09618933		TTTTCCTAAATTGCTATGCTGAGGCCTTTTTGACGGTTTGTCCGCCATCACTTTCAGAGG[CG]CTCCGCGCGAACCCCGAAAATCTGTGCAAAATTCTCAGGGTTAGGGGAAGAGCATGGGTG	0.274826	0.388692	0.312873	0.339892	0.30897	0.500469	0.632653	0.521664	0.463601	0.774756	0.420299	0.369778	0.351162	0.375541	0.53198	0.181372	0.1967	0.204241	0.198172	0.177784	0.190325	0.190497	0.161817	0.185995
cg07803375	HEATR2	AGTCCAGGCGCTCAGACTTTTCTCCTTCATGACCCTCATCTCTGCTCTCGGGCCTCAGCC[CG]CCTGTCGTACTGCAGGAAATTTTGTTTCCTGCTTGTCTTCAAAGACTTCAGGGCTTAGAA	0.393283	0.704936	0.551539	0.512885	0.473907	0.910353	0.899192	0.764364	0.81441	0.631239	0.752814	0.542749	0.559517	0.582903	0.625049	0.919432	0.91866	0.923879	0.912116	0.911831	0.907321	0.920735	0.882881	0.912928
cg21130113		GTTGCACGTGTCACTTACCACCCCCATACGGCCCTCTTCCTGACTGTCGCCTCCCTTCCT[CG]CTTACAGACCAGTTACTTAATCTGCCACATGACGAGATGGTATCTGGGATCTCTAACGGC	0.650822	0.650195	0.634149	0.533957	0.597187	0.74879	0.80938	0.87025	0.860744	0.856613	0.663794	0.690054	0.556576	0.648758	0.784879	0.809443	0.814661	0.827916	0.82335	0.793981	0.808012	0.840073	0.758031	0.806506
cg22414151	CBL	TCAAATCCACAGATGTCCCACACATTTAATTCTTTTTAACAAAATTTCTGGGCCGGGCCC[CG]TGGCTCACGCTTGTAATCCCAGCACTTTGGGAGGCCGAGGTGGGCGGCTCACTTGAGGTC	0.374994	0.62958	0.419346	0.319584	0.499888	0.897865	0.715225	0.848197	0.873761	0.872546	0.596047	0.420384	0.324684	0.526625	0.885461	0.848523	0.837032	0.844166	0.849855	0.869943	0.829373	0.843158	0.856346	0.825989
cg14859724		AACATACTTCCCTTGGGTCTGAAGCTGATTGATATAAGGCTTATAGCTATTAGGTCTTAT[CG]CCTTCAATGACAGAATTGGCTAGAGGCCCAGACCAAGATCATTTCATTGGATGAGTGATT	0.621637	0.690343	0.646791	0.509634	0.674786	0.883409	0.887159	0.847324	0.84958	0.874416	0.691889	0.668963	0.493579	0.645038	0.880488	0.849603	0.873781	0.851143	0.888938	0.879681	0.859671	0.883622	0.840459	0.881523
cg10249224	TSSK3	CCCTCCCCACCACCCGCCGCTGTGTCCAGACAGAGAATGTTCTAACGCTGGGGGCGGCTG[CG]GATGAAGTCCTTGGGGAGAAAAGGAGCAGGCCAAGGGCGATGGTGGAGTAGAGCTGCCTC	0.2918	0.484768	0.309026	0.336749	0.367732	0.697045	0.723823	0.572331	0.824996	0.527016	0.385611	0.380654	0.366939	0.397756	0.509889	0.71797	0.70985	0.729608	0.701814	0.721521	0.720946	0.626392	0.629506	0.781716
cg02397552	CLN5	TCCTGTAGTTCTCCCTCTTCCCACAAAGCTGTCAGCGCAGTGGAAGAGGTTGCACTTCTC[CG]AGAGAGGACAGGTTTCTGTTAAGATCACCAAGTAGCTGTGCTTTAATTAGAGCCAGACAA	0.571143	0.616126	0.686317	0.604451	0.72722	0.849518	0.840052	0.867082	0.861568	0.693824	0.644662	0.704794	0.598792	0.681004	0.539846	0.858203	0.855887	0.852561	0.837744	0.838666	0.841979	0.865915	0.831805	0.864361
cg15231872	CCDC124	CCCGGCGCGTGTGTGTAGAGCCTCAGGGCTGAGTGCCCAATAAAGGTGGCGGCAAGGCTG[CG]GTGAGGCACTTGAAGCCTAAGTGAGTGGGTGGGGAGAGGCGGGCGAAGAATGGGGAGAAG	0.568441	0.699443	0.599775	0.518598	0.668902	0.840249	0.811258	0.77935	0.859194	0.612419	0.689881	0.603671	0.512952	0.631553	0.819351	0.855914	0.828589	0.855332	0.842297	0.854953	0.832226	0.863043	0.836932	0.857283
cg26920007		TGGTGGGGTGGGTCTGGCAGTGGCGGTGCCCCGTGCCAGGGGCCAGTGCTGCTTCATACC[CG]GCAAACTGACCTCTGGCCTTTGTTTTGCCTGCTGTTCCCTGCGCTGACCGGGCTGACCTG	0.643881	0.626755	0.566083	0.508111	0.55768	0.812482	0.762872	0.803509	0.814279	0.576577	0.604902	0.590694	0.506728	0.554331	0.813911	0.767872	0.771938	0.785261	0.769836	0.786007	0.761552	0.775582	0.742386	0.785856
cg15622158	CNKSR1	TTAGGCCTGGGCTCTGGGAGCGGAAATTCCGGCGACAGCAGGGCAAAACAGGAGCTGATT[CG]AGCTGGCAGAGCTGGGCCATGGAACCGGTAGAGACCTGGACCCCCGGAAAGGTGGCAACT	0.344217	0.445341	0.475954	0.504185	0.343422	0.867423	0.678799	0.700997	0.763881	0.506866	0.434565	0.509688	0.543723	0.431444	0.348484	0.124406	0.128984	0.129198	0.122052	0.12218	0.122094	0.164501	0.192265	0.175027
cg14282850	TACC2	CTCACGGCTCAGACCTATCTAGTGAAGAGCTTAGGAAACAGAAAGGACAATGTGACTGTA[CG]TTTGGGAAAATGTGCTCCTCAGTCATTGGAAATTCAGCTCGCCGGTCCCTAACGTCCCCG	0.593873	0.632173	0.567348	0.587588	0.650776	0.730414	0.844036	0.887392	0.886435	0.88693	0.631991	0.605376	0.576507	0.676384	0.901765	0.491773	0.489301	0.514901	0.530894	0.418432	0.363667	0.496573	0.402796	0.450611
cg18407136	C15orf40	GATCCGCCCCCTAAATGGGAGAGGGTGGCCTGAACTAGAGTAACCGCAGGGAGGGTGGAG[CG]CTGATCATTTCAAGGATCTTCAGGAACTGAAATGATCAGAACTTGGGAATGACTGCATGT	0.662103	0.702805	0.633903	0.542795	0.628906	0.865969	0.876314	0.833811	0.844069	0.883338	0.677791	0.664627	0.55375	0.646684	0.856585	0.841013	0.822882	0.841538	0.844837	0.834924	0.823082	0.836698	0.809168	0.850048
cg17133045	AKT3	TTGAAAACTTGGACACAGTAATTGTACCATATGGTGAGCATTTATCCTTTCTGAAATGCA[CG]CTAACAGTCACTTACATGCACACTGCTTTGTTTTACAGTTGTTATTCTCTCTACCATATT	0.578037	0.52402	0.481342	0.337188	0.583633	0.779296	0.859845	0.744639	0.863977	0.917501	0.526596	0.53638	0.432707	0.530782	0.90989	0.866441	0.858294	0.811916	0.815078	0.860232	0.854714	0.887331	0.786663	0.873387
cg14842237	MACROD1	ACGCTGCTAAGTGGTGTCGGGCGGCTCCGAGTGGCTGGTCTCCCAGAGCTGACAGCTCTT[CG]CTTGGGGAATAATTAATTCCACCGCCCAAAAACCCAGGGCTGCAAGTTGCCATGTTACTT	0.540076	0.693749	0.525664	0.444769	0.550401	0.84477	0.901422	0.86183	0.932599	0.895548	0.65979	0.529588	0.478685	0.660036	0.884702	0.801252	0.816195	0.873512	0.869741	0.818101	0.816495	0.862883	0.832442	0.837305
cg09102257	EGR1	CAGGACCTGAAGGCCCTCAATACCAGCTACCAGTCCCAGCTCATCAAACCCAGCCGCATG[CG]CAAGTACCCCAACCGGCCCAGCAAGACGCCCCCCCACGAACGCCCTTACGCTTGCCCAGT	0.350114	0.616911	0.36892	0.186529	0.309994	0.808182	0.856497	0.886784	0.872674	0.864973	0.587994	0.359511	0.260612	0.466427	0.874149	0.870899	0.868012	0.879258	0.880803	0.867652	0.883664	0.899277	0.835969	0.895831
cg00705730	NCK2	TTGATTCCACAGTGCCCCGGTGGTGCAGTCAGTGGAAGCAGCTGTAATCTATGGGGTCAT[CG]TTGGCAGGTGCCCGGCACAGGGCTTGTCACTGCTTGTATATTATCTCTAGTCGCAAATGC	0.464532	0.697545	0.469371	0.383477	0.480127	0.897967	0.830293	0.87693	0.871285	0.902986	0.635358	0.460649	0.380295	0.550561	0.92343	0.893397	0.875828	0.896078	0.865003	0.868164	0.864972	0.893204	0.855608	0.88977
cg22992730		TGACCTCGTGATCCGCCCGCCTCGGCCTGCCAAAGTGCTGCGATTACAGGCGTGAGCCAC[CG]CGCGCAGCCTTAAATGTTTTTTTAAGGGTCCGTTTTGTTTTATTTTGCTCCCTGGTCTAG	0.57933	0.657184	0.452176	0.362521	0.614729	0.884964	0.950909	0.854297	0.874625	0.586674	0.662084	0.514964	0.335304	0.596379	0.890727	0.80134	0.827142	0.779461	0.826364	0.796217	0.777258	0.924763	0.924986	0.929149
cg18699439	SERTAD1	GCGGTCGCTCCAGTGCCTGTGTGCCCACCAGCACATCCATGAGGTAGTCCAATTCGGCCT[CG]TCCAGCTCCGGAGCTTCCTCCTTGCCCGGCCCATCCTCAGGGCCTGGTTTGAGGCCCTCA	0.570035	0.67974	0.594602	0.593463	0.545528	0.810282	0.76421	0.813481	0.812672	0.767872	0.628401	0.636724	0.575262	0.585404	0.558376	0.768593	0.753813	0.746383	0.76601	0.793887	0.771074	0.778023	0.745617	0.774083
cg03572260	STARD3	TGCTGGCACAGGATGGTAAGGGATTGGGTAAATCCATTCACCTCTCTGGGCCTTGGTTGT[CG]TATCTGTAAAAGAAGAGGAACCGTCCCTGCCCTGAGTGGACGTGAACGTGGGTGTGGATC	0.577979	0.757936	0.653656	0.609716	0.637915	0.904204	0.915412	0.939123	0.918862	0.889704	0.727087	0.690387	0.611779	0.669777	0.908083	0.876275	0.864805	0.91746	0.86823	0.876731	0.874193	0.875445	0.85854	0.870688
cg10538275		ATGGCTGGGAATATCCGTCTCCCCACGCGGGCTGTGGGCCTCCGAGGGCACAGACGCTGC[CG]TATTTTCCCTGCTAGCGTCTAGACAAAGCCTGGCATAGGAGGGAAGTCCTGGGAAGTGTT	0.55641	0.588681	0.690149	0.619921	0.684027	0.813687	0.742867	0.913632	0.871471	0.322082	0.596516	0.66249	0.617577	0.585012	0.532589	0.808547	0.794808	0.801894	0.78453	0.825248	0.802737	0.862599	0.794671	0.841982
cg07539451		CCCTGCCATCTGGGTCATGAGAGCCAGGGGCGGCGAGGGCGTGGCTTTTACTCCCCACAC[CG]CAGGGAGTGCCTCACCCCCCTGCCATGTGCGTCTTGAGAGCCAGGGGGGGCGAGGGGGTG	0.691522	0.733734	0.663629	0.587603	0.561476	0.946773	0.920955	0.864047	0.943968	0.834396	0.726044	0.632086	0.532544	0.603846	0.956876	0.928075	0.896063	0.907875	0.902721	0.885221	0.813701	0.869931	0.873834	0.902483
cg05279866		AGATATTTAATAAAGTAAAGCCTCGAGGATCAAGGGGCTGCAATCCTTCCCACTCCTTCC[CG]CAGCTCGTGCTGGAGTTCTTTAAAGCCTGCCTTGCGTCTGCCTTTCTCTCCAGAAAGCCT	0.281267	0.512643	0.384265	0.232292	0.357506	0.816273	0.693604	0.627918	0.58561	0.391925	0.521322	0.390118	0.242761	0.440817	0.512147	0.747904	0.765453	0.759207	0.77505	0.764089	0.747637	0.746521	0.660216	0.7313
cg02532853	NCRNA00114	GCCCCGGGCAGAGCACTTTTCCTCCACCCCTCACAGAGGCGCAGGTTACTTGTACCAGCC[CG]ATGCAAATGCTTTGGTGAATGGGCTACCCTAAAACAGAGGATGATGAAGAACGATGGCCA	0.634209	0.695697	0.712929	0.587956	0.648888	0.884164	0.893788	0.781215	0.902134	0.878431	0.705633	0.724368	0.577962	0.667149	0.885583	0.81065	0.828861	0.839979	0.815071	0.815507	0.805078	0.816917	0.807884	0.841668
cg12063688	PLEKHG3	GCTCACAGTGGCTCGGGAGGGAGTCTCCCAAGGGTTTTACAATTTGCTGGCTATGTCCCA[CG]TGTGTGCCACAAGGAGACGTTAGATACCAGGAGCCATTGTTGGATGTTTAAAACACCCTG	0.414698	0.554027	0.610231	0.561825	0.41948	0.862281	0.86218	0.697867	0.839292	0.402025	0.634215	0.622585	0.559665	0.480054	0.646261	0.223189	0.210196	0.235037	0.255296	0.221368	0.211471	0.251974	0.203551	0.206583
cg19402179		TTAAAAACTGAGGGATCTAGTACAATGAATATTAGAGGACAATTGGAAGCCTCTGCTGCA[CG]GAGGATACAAGGACACTTGGAACACACACCTACCCTCATGATGCTTTGGTACAGTAGCAG	0.589408	0.66844	0.580928	0.594014	0.464836	0.820178	0.842074	0.867837	0.855575	0.595096	0.638714	0.608925	0.617141	0.528299	0.644175	0.813817	0.763889	0.760931	0.766959	0.808326	0.807933	0.819462	0.796091	0.837366
cg01359165		TTTACTCATGTGCAGCCTCAGTAAAGTTGCTTCAGTTTGCCCTACTGAAAATAATAGTAA[CG]CTGCTGTCCCCATACAGAGGGGCTATGAGGATGACAGGAGCTGATGTGAGCAGAGCCTGG	0.641002	0.710355	0.538569	0.591952	0.608753	0.826435	0.853667	0.877846	0.91127	0.394195	0.665977	0.55084	0.606206	0.690887	0.808577	0.852534	0.840339	0.871302	0.861726	0.845292	0.82979	0.831419	0.803033	0.847653
cg13054378	SMURF1	CAAGCCACTTTAAGATAAAATACTGACTTTTGTGCAAACTGGAAATGGTGTCAGAAACTT[CG]AATCTAGCCTTGCTTCTGGCCTTGCTCATCATATGAAGACATCTGGGCAAGTGAACCGAG	0.235685	0.55411	0.351751	0.237209	0.397724	0.827653	0.757246	0.710815	0.819769	0.801643	0.518452	0.345214	0.257928	0.464677	0.83338	0.742271	0.784906	0.757737	0.777014	0.795469	0.744107	0.778774	0.747326	0.81392
cg24258705	MET	CCCAGTTTGCTCGTTTCTTCTTTAGGCATTAGGCTTAGTGATTCTCGCCAGAGCCATCTA[CG]CTTTCTTTTCCGTGGTCTAAATCCCTAAGATTTCCTTGGTCTGCTGTGTTTATTCATAGG	0.580754	0.697575	0.575757	0.520095	0.634651	0.865036	0.880955	0.866838	0.886213	0.898157	0.704546	0.577263	0.52813	0.623931	0.877869	0.828248	0.801164	0.824924	0.804052	0.839726	0.786686	0.842822	0.791507	0.845998
cg23301687	RAP1A	CACTCCACCAGCATGCAAGCTGCAAGAGGGTCTTTGCCTGTCTATGACTTTAAACCTCTG[CG]CTTAGTTAGAACAGCGCCTGGAACCTAACAGGTGCTCAATTAGGGCTTGTCGAATGATTG	0.472971	0.465871	0.422593	0.468982	0.495455	0.659561	0.674414	0.635215	0.820431	0.550032	0.432618	0.46003	0.460435	0.455378	0.650784	0.563391	0.542188	0.540183	0.536146	0.575446	0.508941	0.543187	0.564955	0.574652
cg15171155		ATTCTTGAGGCAGCAAATATGAACGAGATCCTTTCACATTTCCCAAGCTGGCAATATGTC[CG]TCAGCAAGAGAAAATATTCTTTAGAGCAGGTTGTCAGAGTGATTTTCATTTTCAAATTCT	0.607622	0.723396	0.592605	0.597993	0.628418	0.90502	0.835767	0.90738	0.867439	0.907106	0.659716	0.625636	0.635503	0.673819	0.894233	0.858709	0.838344	0.835309	0.851645	0.845079	0.85229	0.836149	0.783579	0.819009
cg23160483	ASPSCR1	CAGACCACGGCGGACGGAGGCGTCCTGCTGACACAGCCCCTGTCGGGATGTGGGAAGGGG[CG]GAGGCACAGCTCCAGCCCCAGCGTGACCGTGTGTGTGGGAAAACCGTCCGGGTACTTGGG	0.546273	0.511092	0.421359	0.573678	0.549572	0.688424	0.709978	0.739909	0.799471	0.763551	0.540936	0.459924	0.583477	0.457892	0.707203	0.82294	0.799682	0.806824	0.80694	0.809817	0.81357	NA	0.755378	0.78413
cg10942056	DISP1	GTGGAGCTGCGCCTGCCAACTCATTGCTTTCTGCTGTGCTGTGATCCTGCAGTCAGTTGC[CG]CTGTTGCTACTGCAATCATTTGCACCAAACTGAGCCAGAGAAGTTCCCTCTTTTAACATA	0.194077	0.213829	0.241328	0.15519	0.1951	0.381295	0.431064	0.530779	0.366936	0.24225	0.263664	0.261635	0.163242	0.269051	0.323774	0.268261	0.254452	0.283558	0.223087	0.249304	0.256548	0.382946	0.297896	0.401773
cg04179148	SERPINA1	TCCTCATCTGTGAGATAGGAAGACTCTAAGAAGAGTCACTTCCATCAGGACTGTGAAGAT[CG]AATGAGATAATAACATTTAAGCACTTCGGGCAGCCTCTGGCATGTGATGGGCCCCAAGTC	0.536274	0.578751	0.439861	0.442461	0.438788	0.809338	0.633561	0.871292	0.832742	0.870691	0.562369	0.448108	0.427423	0.497527	0.860925	0.740701	0.710031	0.734982	0.707958	0.736498	0.719513	0.721452	0.67387	0.721608
cg00779216	COL6A3	TGCGGCTCCCCAGGGGCCTCTTGAAGATGTTCCTGGACACGTACTCCAGGGCATTGCCCA[CG]TTGATCTGCCGCCCTCCCTTGGGCCTCAGCCGCTGCACCGCGTTCTGCACTTCATCCTTG	0.526769	0.588489	0.477884	0.524404	0.574931	0.819731	0.687368	0.727997	0.745462	0.791732	0.548283	0.50961	0.513687	0.537555	0.847587	0.756912	0.72561	0.735183	0.739729	0.736343	0.705159	0.728391	0.660632	0.719343
cg24164786	LTBP2	CACTCCTCCCAGGGTCCCGCCGGCCCAGCTGTGCCGGCACTCACCCAGCTGGTTGGAGAG[CG]GCAGTGTGAAAGTGGACTGCTTCAGTGGGGCTTCCAGCAAGGCCCTGGGGCGGGACCCCC	0.41212	0.550786	0.37021	0.418655	0.533605	0.792844	0.674702	0.652897	0.751396	0.715514	0.524849	0.416461	0.44308	0.530222	0.814095	0.745659	0.759796	0.749905	0.751825	0.779608	0.762307	0.735334	0.698464	0.709545
cg03101413	SMOC2	CCGCCTGAGCTTCAGCTTGCCTTGTTTATTGTCAGAGGGTGCGTTTCTGATTTACGCATC[CG]GGGTTATCAGGTAGGACGGCTTAAAATGGTGAAAGAAATGCACTCACATTTCAGAGGCTC	0.606008	0.647901	0.655416	0.582293	0.526433	0.761917	0.781408	0.86195	0.853087	0.669544	0.674126	0.638423	0.577436	0.604132	0.537154	0.690877	0.711032	0.745092	0.707182	0.712615	0.716923	0.790084	0.753172	0.822957
cg03638715	FAM100A	GTCCAGACCGTGACCAGAGCCAGGCACGTCCATGTCGCCCTCATTGCTCTCGGTGGCACC[CG]TGCCCCTGCTCTGGCACGAATTGGGGTCCCAAGGTGGGGCATACAGATCTGTGCATGGGC	0.610432	0.621504	0.606934	0.51798	0.476436	0.848866	0.757813	0.842367	0.825416	0.715803	0.622279	0.626956	0.522988	0.487308	0.582294	0.808813	0.781875	0.790397	0.761478	0.800987	0.779689	0.805553	0.749317	0.801214
cg07813275	NPL	CGTTTTTATCCCATTTCTTCCTGTAGGCGTTTCAAAGTTTGCAAAGGCAGCAAACTTTTA[CG]TAGTGTAGTTATCTGTGCAAAGAAATTTTCCAAGCTGCCATTGCCCCCAGATGGCAGACA	0.35743	0.626104	0.3638	0.294088	0.450461	0.854822	0.860599	0.629295	0.835096	0.874163	0.619722	0.366825	0.351309	0.555975	0.856896	0.846711	0.847592	0.829366	0.880451	0.86508	0.88782	0.866918	0.785885	0.852574
cg10565512	FOS	AGAGGAGAAACACATCTTCCCTAGAGGGTTCCTGTAGACCTAGGGAGGACCTTATCTGTG[CG]TGAAACACACCAGGCTGTGGGCCTCAAGGACTTGAAAGCATCCATGTGTGGACTCAAGTC	0.581751	0.65016	0.541738	0.600261	0.586125	0.841069	0.82449	0.859702	0.856332	0.56832	0.659276	0.551359	0.58218	0.625536	0.829209	0.762326	0.770645	0.766896	0.766995	0.780068	0.744022	0.770528	0.703573	0.741755
cg00400992	LHFPL2	GACCACAGTGCCCTGAAGGGTTACTGTGCCTCCCGGCCCCTCCCTTGGCACACTGGATAT[CG]AGCTCTCGTTTTACCAGGAGAGACGTGGACAGGCCCTGTGTGGCTCTGCTGATCCCAAAA	0.600792	0.735832	0.542149	0.473267	0.530856	0.907661	0.896863	0.789115	0.874551	0.900337	0.712949	0.583988	0.506207	0.623689	0.905493	0.91957	0.903534	0.900456	0.900702	0.904627	0.906017	0.895842	0.873202	0.916107
cg12265908	PFKP	CTGTGGGAGCCTGCAGGAAGGGGTGTAAATGCCCGGTAAGTACGAGCTCCAGGACAGAGC[CG]TACCCACTGGGGGCCGCTGCCTGGAAAACAGCCTTCCTGGTGAGACAAGAGGCTCTTTAG	0.595803	0.677926	0.598378	0.605209	0.701293	0.847914	0.856205	0.835706	0.86329	0.87205	0.660097	0.626746	0.621855	0.711865	0.864425	0.810549	0.830891	0.80858	0.793337	0.817259	0.807374	0.808643	0.779775	0.846264
cg07069839		TCACTACTTCGGATAGGAAGGAACTGATATTTTTTTAGCATCTGCCAGATACTTTATAAA[CG]TAAGTTCATTTAATGGCTTAGCACATGAGGTGGATATCACATGGCCCCATTTTACGATGA	0.61591	0.751813	0.616958	0.548757	0.650779	0.878082	0.865547	0.889196	0.861171	0.867658	0.775995	0.650363	0.574	0.741543	0.883708	0.86595	0.887891	0.848692	0.878709	0.886447	0.848365	0.884771	0.859768	0.874245
cg26856596		TGTTTGTCTCCTGATGGGGCTGGCTTCATGGCTGTCTATGTAGATTAAGATGGATGGAAT[CG]TGCAGTTTAAACATGGCAATGGCTGCGTGTCAATGACACCCTCAACGAAGGTGGTTTTAA	0.459673	0.666898	0.594406	0.459138	0.455452	0.847171	0.879836	0.829909	0.871027	0.47905	0.667926	0.557499	0.478875	0.599659	0.253325	0.873307	0.858817	0.864046	0.816061	0.834857	0.854053	0.84063	0.817618	0.858313
cg04880737	LRRFIP1	GTGCTGGGCCCAGGGTGCAAGTGCAGGCACCTGTTGCTGCAGACGCACCTGGCTGTCTCA[CG]TTGCTCACGGTCAGAGTGCGTTTGCGCCTGTGACTTCTGCCCAAGGTCAGGCCAGGAGTG	0.611611	0.625869	0.646499	0.604016	0.683997	0.915279	0.850793	0.835014	0.874407	0.717954	0.621201	0.63263	0.63736	0.626743	0.504009	0.766791	0.788982	0.78398	0.779036	0.770428	0.771301	0.775635	0.724014	0.781459
cg18738581	IL17RE	AATGGTGCCTCAGTCACCTCTGTATCTCCAGCACCCAGTGCTGAGTAGTGCTTAAGAGCT[CG]GCTAATTCTCTAAGTGAGGGGGTGAAGCGCATGTCTATGGGAGACACAAGTTCCAGAGTG	0.419418	0.471228	0.550687	0.400662	0.401244	0.823482	0.56552	0.879185	0.876922	0.695655	0.498327	0.590287	0.392686	0.449418	0.848103	0.647904	0.65731	0.727445	0.687926	0.660377	0.665198	0.645022	0.647429	0.715869
cg07175580	IL19	TCATTCATAGGTGCGATCATAGTGCACTGCAGCTGCCTAGTTCACATTCTTCACCTGGCC[CG]TTGTTCCATCCAGTCTTGACCTCGCTAGCCTGCAGGGGGCGTGTGCAAGCCCACACTACA	0.429061	0.426186	0.427606	0.462169	0.364658	0.538457	0.657018	0.788587	0.837347	0.880927	0.460517	0.434822	0.475926	0.3974	0.894325	0.6149	0.631533	0.639922	0.632652	0.600604	0.621695	0.651732	0.535752	0.668831
cg09147372	MAPK15	TAGAAATGAGGTTTTATGTTGCCGAAGCTGGTCTCCAATTCCTGAGTCATTAGCCACGCC[CG]GCTAATTTTTGTATTTTTAGTGGAGACGGGGTTTCACCACGTTGGCCAGGCTGGTCTTGA	0.638669	0.696657	0.532874	0.48847	0.55622	0.855721	0.860501	0.847533	0.813747	0.70448	0.726592	0.488657	0.50097	0.655842	0.813309	0.848992	0.841093	0.856962	0.816484	0.850394	0.845954	0.858909	0.851763	0.834138
cg19888654	KIF13B	CCCTGGAGCCCGGAGTGCCCGGTACCCACCTGAGGGCAGGTCGAGCTCCACGCCGACCCA[CG]TGCCCTCTTGGAAGTCGGCAGGCCCCACGTATCTCACCACGCCCGTTTTGTGGGCGCCCA	0.669102	0.624843	0.742977	0.526726	0.507715	0.937957	0.931374	0.921388	0.944898	0.861466	0.611511	0.739428	0.54142	0.573984	0.96202	0.940734	0.90934	0.928848	0.930083	0.938125	0.917964	0.932819	0.909824	0.930957
cg00919591	BCR	CCTGGCCCCGCAGGTCCTACTCCCCCCGGAGTTTTGAGGATTGCGGAGGCGGCTATACCC[CG]GACTGCAGCTCCAATGAGAACCTCACCTCCAGCGAGGAGGACTTCTCCTCTGGCCAGTCC	0.562413	0.666638	0.619166	0.579635	0.510028	0.86722	0.843261	0.859238	0.82525	0.55064	0.668549	0.616125	0.603456	0.610901	0.522214	0.273323	0.270094	0.332511	0.318256	0.379087	0.377272	0.332886	0.388056	0.205673
cg22716599	DNM3	GGACATCGTCAGAAATATTGGGCTGGAGAGGGAGATCAGGAAGGGATCAGTACATGTTGT[CG]AGAAATAAGTGACATGATGTGCAATTATGTATGTGCTCACCACTCTATACTCAACGCCCA	0.679414	0.618659	0.480276	0.510791	0.542917	0.721927	0.804993	0.827995	0.836352	0.647138	0.533816	0.543021	0.460714	0.531742	0.81691	0.86872	0.878599	0.784022	0.835737	0.877646	0.833823	0.841913	0.795966	0.864628
cg10057904		GCCTCCAAGAGCTCCTACCTGGGGTCCAGAAGGTAGTCTGGGGAGCAAGCTCCGGAGAGA[CG]AGCGGGGGAGACTGGGGTCCCAGCAGACGCAGAATGGTCTCTCCACAAAGAGGGGTTAGC	0.633872	0.518979	0.59828	0.544349	0.511979	0.798353	0.735594	0.782953	0.805531	0.809679	0.545046	0.61401	0.536649	0.483879	0.818591	0.718141	0.699496	0.736102	0.729177	0.739841	0.734312	0.718736	0.728127	0.765339
cg21082272	LOC100130872	GCACTCGGTAAAAGGTATTTAAAGCGCATGTAGTTTACAACACTAACAGCCCGCCGCCCG[CG]AGCACAGCCCGTCTGGTCATCCGGCGGCCTCACCGTTCACCACGGTTGGCGGCCCTGGTC	0.605967	0.751544	0.618258	0.488702	0.701629	0.840979	0.972237	0.88958	0.969731	0.965905	0.70151	0.616115	0.495835	0.669922	0.966866	0.962159	0.946428	0.969964	0.962316	0.95985	0.944377	0.952608	0.944834	0.948919
cg21901395		ACGTTGCCTCTCATATAATGGCACCAATTTCATTAGGAATCAAATGCTCAGCGTTTCTCA[CG]TACGCTTCTAGTCCTTTTGGCTGCCTCCCTCGAAAGACCAAGAATTAAATAGATCAGAGG	0.410884	0.528866	0.446608	0.425166	0.373988	0.662879	0.760726	0.735996	0.828847	0.589826	0.567747	0.469098	0.424935	0.441642	0.742531	0.129281	0.135326	0.127518	0.131447	0.170441	0.141922	0.149562	0.277133	0.187203
cg05437692	NR3C2	GCTCCACTTTAAATTATTTTTTAAAACTTCTCCTCTCAAGCTTTTCCATGATAGCTGCCA[CG]ATGTCAAACATAAAATTTAAACTTCACAGCAGGACTTCACAGATGGAGAATGCTGTTATC	0.256457	0.385243	0.37987	0.303113	0.285757	0.532026	0.460068	0.555452	0.592902	0.699474	0.369308	0.373653	0.310654	0.318782	0.388875	0.090383	0.110243	0.102763	0.0898229	0.129974	0.122538	0.151696	0.118098	0.139203
cg05647756	UNK	GAACCAGCGGCGCCGCCGGTCCATCCGCCGTCGGGACGGCACCTTCAATTACAGCCCTGA[CG]TCTACTGCACCAAGTACGACGAGGCTACAGGCCTCTGCCCGGAGGGCGACGAGTGAGTGA	0.634517	0.745904	0.59341	0.442196	0.648393	0.929696	0.969175	0.960209	0.978232	0.943244	0.699986	0.602746	0.434153	0.695786	0.975033	0.967577	0.966495	0.974431	0.970953	0.972853	0.961605	0.967839	0.946549	0.963593
cg23731781	PEAR1	AGGTGCCCAGGTGCCGGGAGGAGTGCCCGGTGGGCCGCTTTGGGCAGGACTGTGCTGAGA[CG]TGCGACTGCGCCCCGGACGCCCGTTGCTTCCCGGCCAACGGCGCATGTCTGTGCGAACAC	0.588114	0.70944	0.658347	0.616025	0.648701	0.880803	0.899714	0.867229	0.883706	0.907654	0.731728	0.672192	0.616131	0.650894	0.900687	0.793707	0.668419	0.774822	0.761509	0.804823	0.779247	0.843277	0.769694	0.822516
cg20080845	BRD1	CAGGAGGCCTGGCGGGGGTGGGACAGCTGCAAGGCTTGCTAACAGGCGGTCTGGGGGCTG[CG]GCAGTGCGGGGTCACCCAGGAAGCCAAGAAGCCAGACCAGGACACAGACACATCCCGGGA	0.589659	0.696283	0.572463	0.536354	0.591097	0.837226	0.808148	0.830755	0.755702	0.841872	0.64815	0.571885	0.520847	0.658034	0.851665	0.782874	0.781727	0.769	0.789212	0.804149	0.779417	0.821325	0.764536	0.799106
cg26935391		TGTGCGCTAAGCCCAGGGGCGGGGGTGGGGCGATGCGGGGTGCAAGGCCAGGGCCTGCAG[CG]CAGAGTGCGGAGGTGGGGGCTGTGTTCTGGGGGTCCAGGGAGGGAGGGCCCACCTCTGGC	0.468801	0.579104	0.621737	0.565857	0.60022	0.786824	0.892488	0.873709	0.684111	0.668642	0.577511	0.613201	0.583063	0.55928	0.853477	0.330203	0.341134	0.311968	0.346331	0.353159	0.364123	0.334271	0.408329	0.34043
cg12066473	SORBS2	TAACATGCCCATTGCTTCTCTCTTCCCTGAAGAGATGTATAAAAGAGGCTTCTTCCAGGG[CG]AAGCTCAGCAGAATATGCCACACTGTTTTCCATAAGTAAAATGGCTGGTCCTCTCAGCTC	0.256203	0.493186	0.433395	0.425658	0.250595	0.85221	0.857603	0.761405	0.83271	0.407586	0.480623	0.442196	0.465042	0.301899	0.202471	0.75207	0.745556	0.738703	0.732059	0.738339	0.770099	0.752816	0.678606	0.777417
cg23876149	PPAP2C	GGGGGCGCCAGGAGCTGGGAACCCCATGAAATGGCGCCGGGGTCTGTGCCCCCACCAGGT[CG]TGGGGAGCCCTGAGCTGAGGGTGCCTGGGGATTGAGGGCACCTGAGCCAGGGAAACCCAG	0.598361	0.703875	0.762449	0.662624	0.676755	0.870355	0.844707	0.9392	0.894115	0.900098	0.689455	0.729871	0.716542	0.622579	0.937196	0.896235	0.843532	0.864674	0.864594	0.881733	0.873122	0.89998	0.843808	0.907662
cg25134818	BZW2	TCTGTGCGTCATAATCCAACTCAGAAGGCATTCCAAAAAAAAAGAGTACCAAAACTGTTT[CG]AGCAATGTCAGCACTGATAGGATAAGTATTAGTCTAGGAAAATCAGGAGCAGGCCCAGGA	0.587132	0.710546	0.611736	0.516955	0.566644	0.865492	0.877717	0.866862	0.834312	0.606929	0.69319	0.659064	0.582968	0.65568	0.621768	0.861299	0.829653	0.823363	0.863755	0.821355	0.85042	0.857803	0.794455	0.851216
cg26678217		CTGTTTAAACAACCTTTGGACTACTCTGAGCAATTTTTTTTTTTTTTTTTTTTTACAGGG[CG]TCACTCTGTCACCCAGAGTAGAGTGCTCTCTGCAGTTAAGCATTTTTTTTTTGGGTGGGG	0.328198	0.557481	0.365692	0.326982	0.490523	0.848395	0.821516	0.773065	0.691964	0.71368	0.548587	0.37305	0.345001	0.520261	0.743419	0.757574	0.783877	0.747907	0.736305	0.744293	0.738518	0.752168	0.732409	0.732333
cg00252804	CHD5	GCGGGGCGCAGCGTCGGCCCGGCCCCTCCCGCTGAATGGCTACCCTCCGTGCTCCACCAG[CG]CCCACCCCAGGCCAAGGCTCCCGGCAGAAAGGAGGGAAAGAGGACGTACTGCCATCTGCT	0.528817	0.585334	0.544517	0.585276	0.550276	0.825095	0.774957	0.838765	0.750569	0.295111	0.560924	0.56714	0.61921	0.533272	0.465975	0.696612	0.679088	0.703154	0.7271	0.700503	0.681887	0.645165	0.638601	0.676468
cg01982833	MED21	AAGCTGAGTTCCCCAGGGACTGTGTCTTCCACCTTCCCCGCAGCCACAGGAAGGTAATCA[CG]GATAATCAGCCTGAGAAAGAGGATATGAGAGTTTTTTGAAGTCTACAAACCTGTTATTTG	0.533714	0.620179	0.615076	0.538532	0.48767	0.665513	0.878151	0.868119	0.875813	0.616343	0.618134	0.65335	0.542242	0.489431	0.627685	0.764589	0.736032	0.770873	0.745226	0.75201	0.76649	0.736405	0.772767	0.726696
cg16786136		TCAACAAGTGGGCCTTTTATGCTTCCCAAGCCAGCCAGGGCTTTGCGAAGCCAGTGTGTC[CG]GGGAGATAATTGCATAGCCCTGTGGGGACATCTCCCTCTAAGAACTTTCCTACCGGGTCC	0.613047	0.709501	0.461591	0.570265	0.624063	0.888534	0.893069	0.88346	0.918862	0.914996	0.705887	0.500611	0.566145	0.625229	0.910032	0.879002	0.871982	0.902173	0.876259	0.897159	0.870444	0.865212	0.874943	0.892508
cg00809399	ZNF692	TACAGCCCACTTCTATTACCATCAGAATTCCTCCTAAAAGTTGCCTGCATTCTCTGTGTA[CG]CTCACTTCCCATCCTCTTCTCTTCAAATGGCTCTGATGGAGCTTTCCTCCCCACCCAGCC	0.242146	0.348289	0.340078	0.266836	0.277284	0.47979	0.650846	0.480826	0.478347	0.165174	0.363011	0.353308	0.282343	0.289616	0.197301	0.47051	0.455793	0.438175	0.48639	0.501001	0.482237	0.425464	0.460518	0.457853
cg04484523	HSD11B1	CTTCATGGCCTACTACTACTATTCTGCAAACGAGGAATTCAGACCAGGTAAGTACCCATG[CG]TCTCATTTTGGAGGAATAGGTTTAAAAAACACAGGGGTGCTTGAGTGTTCCTGAGGACCA	0.726392	0.633769	0.649258	0.617846	0.553864	0.845891	0.77888	0.897264	0.851671	0.573774	0.688711	0.684	0.641002	0.641945	0.667259	0.839081	0.853991	0.847109	0.856953	0.835902	0.834364	0.845763	0.809572	0.852034
cg16170346	TMPRSS9	TGAGTTTTCCTGGGATAGGTCCCCCATCACAACCTACTCCCTGGGGCTCCCAGGGGGATT[CG]TGGAGAGGCGGCGCCCAGGGGGGCCTTCGTGGAGGAGGTGCCCTGGGTCCGCCTGCCCAC	0.51101	0.653225	0.648605	0.591736	0.609024	0.86703	0.81847	0.78787	0.826041	0.872297	0.634122	0.633761	0.603622	0.617764	0.859586	0.794698	0.785858	0.810691	0.795563	0.81125	0.781585	0.850558	0.766256	0.796885
cg00387357	DOK7	TGGACGGGGCTCAGTGAGGACAGCTCATCTCTGCCCCATGAGGTGCTGCCTGGGGTCCCT[CG]GGCAGTGGCATTTGGCTATGGTGGGGCCCAAAGGCCCAGGAAAGCACTGTGCCGGCTGTT	0.586095	0.526648	0.638902	0.550846	0.470146	0.788658	0.792478	0.769567	0.818586	0.847095	0.551999	0.650726	0.568016	0.48494	0.835738	0.75692	0.747163	0.743589	0.754922	0.761011	0.749194	0.78388	0.727136	0.776074
cg27073068	REST	TTAAGCTTGTAGTCATGGGGAGCCACTATGCTTCTGAGGACAGGTGTGACTTACGACTGA[CG]TTTAGGAAGGTATCAAAGGCAGACTGAGAAGCTCTTTCAGGTGTGAAAGGGGGTGGAATT	0.327733	0.438428	0.358657	0.408279	0.257083	0.592551	0.53868	0.584179	0.565167	0.17227	0.383263	0.381966	0.404663	0.305657	0.216191	0.163734	0.126409	0.154898	0.150849	0.142704	0.148598	0.128854	0.150398	0.130842
cg10298059	ZFHX3	CTGGGTGTGATCCGTGGACACAGTTTGGGGACCAAAACAGGATGTTCTCAGCAAATCCGC[CG]AGTTCCAGGCCCGTAAGAAGCAAAGTCAAGTGCCTGACAGACTCTTATTCAAGACTCCAG	0.714761	0.633588	0.648721	0.620377	0.769696	0.90712	0.883538	0.909732	0.86117	0.695332	0.649595	0.656551	0.6389	0.658417	0.89822	0.89815	0.883881	0.877245	0.842672	0.887082	0.839595	0.879297	0.862997	0.880228
cg17713751	CUX1	CTCGGTGTGCTTGCGTGGAGAGTGGAGAGGTGCGTCGTTTGTGCCCCGCTTTGCCATGAC[CG]GGGTGGTCCTGGCACGCCGGGTATCTAGACAGCTTTTCATCAGTCGCTCATCAGCATGCT	0.547104	0.7675	0.541942	0.549212	0.587815	0.923669	0.932162	0.867938	0.951546	0.932847	0.72759	0.570396	0.558955	0.627828	0.955759	0.943999	0.932963	0.937328	0.929217	0.916968	0.919922	0.938771	0.855721	0.950929
cg13571293		ACAGTGCCTCGACGGTCCATGCTGGCTTTTATGCGCAGGGCTGAGAATGGGGTTTGCAGC[CG]GGCTTTCCCGTCCAGGGCAAGCTTTCCCAACATCAGAGCTGGCCCCAGGCCTCTGGGATC	0.571374	0.574546	0.643452	0.573246	0.46261	0.744512	0.743031	0.856722	0.827745	0.512058	0.557643	0.63669	0.579292	0.491763	0.541778	0.766814	0.747266	0.776865	0.775138	0.769448	0.753867	0.78818	0.749264	0.857581
cg21764632	WIPI2	GTGGCGCCTGCCTGGAGGACGAGGCCAGCGCCCTGCGCCTGGATGAGGACAGCGAGCACC[CG]CCCATGATTCTTCGGACTGACTGAACTTGACCTGTGACCTCTGACCCGGGGAGCAGAGAA	0.604803	0.751386	0.597524	0.59695	0.699574	0.828854	0.872961	0.897867	0.867268	0.896297	0.727461	0.64739	0.655843	0.692079	0.889204	0.879253	0.880657	0.893716	0.884273	0.862337	0.87026	0.869993	0.859096	0.888872
cg20124376	GNG7	GGGGGTGGCAGGGGCAGGGGCCAGGTTCAAGAGTCCTGGGCAGCCGCAGTCCCAGCCGGG[CG]TCTGTGAGCAGTTAATTAAGCCGCACCCTGTCTCTGTCATAACTCATGGCATCGCTGTCT	0.507601	0.588204	0.481538	0.385608	0.525132	0.780601	0.678064	0.790492	0.715397	0.669584	0.544871	0.520387	0.412057	0.593225	0.794062	0.719711	0.723682	0.692994	0.678481	0.794019	0.782424	0.750046	0.699544	0.757199
cg11837016	ZBTB7C	CTAACCAGTTGCCACATGCTGGTGGTGGTGGTGGTCCGTGGACCCCACACTGAGAACCAC[CG]GTCTAGGCAAAGCCTCCACTATGTAGGTGGGCAAACAGACCCAGCTGGGGAACTTGCCAA	0.564211	0.525844	0.589129	0.558944	0.469059	0.822883	0.759786	0.846449	0.833971	0.432548	0.528096	0.607053	0.584387	0.449832	0.813631	0.692004	0.690518	0.693157	0.723607	0.699369	0.700762	0.70987	0.666785	0.732503
cg16696774	MEGF8	GGACTGGACTTTGCATCTTCCCTTCGCGTGGAGCCTCAGTGTGAGAGGCCCTAGCCAATG[CG]TGCATGTCAGAGGTGGTGGGGACCACATCAGAAGAAGAGGGGGGTGATGAAATTAACAAA	0.567569	0.540246	0.549983	0.6108	0.599242	0.814448	0.801798	0.835756	0.82794	0.296978	0.576124	0.57653	0.591214	0.622333	0.471276	0.757338	0.758185	0.748606	0.75969	0.770994	0.749964	0.712908	0.657085	0.699695
cg08065963		CAGGGGACTCTGCCAGGTCCCATAGTGTCTCCCTTGGGCTTTGCTCACAGCACGAGCCAC[CG]CGCCTGGCTGCTCTTCTCATTTTGAAACAAGACTGCTTCAGCTCGCTGCTCTTGTGTGTG	0.586427	0.518514	0.691041	0.628692	0.528532	0.820309	0.808452	0.831807	0.825795	0.690879	0.518825	0.673908	0.615363	0.487311	0.402341	0.82069	0.836352	0.87198	0.824406	0.830214	0.821615	0.826491	0.789517	0.837644
cg17400113	RGMA	TAACCTTGCCACCTTGGCACAGCTGCCACTCCAGAGAGATGGCTATGCCGGTCCGCGTGG[CG]CGCAGGGCCGGATGGTTTGGCGCTCTCTGCGAGGCCCGCAAGGCTGCACTTGGGAGGGCT	0.61632	0.643507	0.733204	0.685884	0.694358	0.906304	0.846678	0.940901	0.931938	0.93435	0.659115	0.742951	0.680337	0.654151	0.936145	0.74006	0.707648	0.756268	0.750489	0.815548	0.766051	0.831653	0.799766	0.858404
cg09836395	GRAMD3	TCTCTGGAGGTCTCAGGAAGGGCCCAGCGAACACACTCTCTTGGATAATTACCACGATGG[CG]TCAGCAAACACTCCACCCTGTGCCTTTTTAGTCCTTCCCGCCCTCCTGCCTCTCCCTTAC	0.638973	0.766387	0.67735	0.635295	0.65586	0.870407	0.882822	0.919083	0.895333	0.900246	0.738927	0.691585	0.654677	0.679108	0.894243	0.868904	0.854026	0.861765	0.856438	0.867414	0.868086	0.838137	0.839676	0.846089
cg27316453	LDHAL6A	TTATCCTAGACGTGCTGGCAGCTGACTAGATGGTGCTCACCCGGATAGAGGGTGGGTTTG[CG]TCTTCTAGCCTACTGACTCAAATGTTAATTTCCTGTGGCAACACCCTCACAGACACACCC	0.694131	0.710731	0.625627	0.537007	0.558846	0.887552	0.869003	0.857414	0.829048	0.401735	0.704179	0.679667	0.592369	0.669999	0.684324	0.865031	0.867528	0.890573	0.846769	0.853367	0.856403	0.861882	0.857316	0.872792
cg14505741	LOC100130872-SPON2	CCCCTGCCCCGGAGCCCTCAGTGTCAGAACCAGGCTGCTGTGGCTGTTTCCTCTTTAATT[CG]CCTGAGTTTTATGAGCCCAAATTCATAGACCTTTGTTGCTGCATATAAACTTGAGGATAA	0.442586	0.569321	0.439943	0.354096	0.445394	0.602677	0.744298	0.728162	0.640629	0.663051	0.563345	0.45183	0.345489	0.496604	0.85089	0.828824	0.782212	0.793869	0.794105	0.828418	0.775158	NA	0.73553	0.781285
cg06245037	ALX4	TTCACCACCACTGCGAGCCTCAAGGCCCCTGGCACCGCCACAGCAAGGGAAAAAACTTTG[CG]CGTGCAGCCCCTCGATTTCGCTTCATGACAACCGTGCTAGAGATTGGCGCCCCCAATTTT	0.292253	0.444941	0.365346	0.202366	0.292146	0.733606	0.855772	0.681809	0.96069	0.0338657	0.452259	0.340846	0.189629	0.280285	0.027096	0.0581	0.0630425	0.0598342	0.0606828	0.0564648	0.0594569	0.0430639	0.0437718	0.0412966
cg18566313	SORBS2	GTAAAATGGCTGGTCCTCTCAGCTCTGCTGCAGACAGCTCATTGGGTTCCACTGGCTTTT[CG]TAGCCATAGCAACAACCAACAGACAGACTTAGCAAGCATGGCTGATCATGTGCAGCACAC	0.282868	0.465334	0.410247	0.395168	0.312612	0.857979	0.869052	0.798085	0.857892	0.473692	0.483892	0.398964	0.381159	0.35408	0.506818	0.78566	0.778841	0.766777	0.743076	0.753036	0.762672	0.786367	0.575871	0.765116
cg11511096		AAACTTGATTTAAAAACCAACAAATCCTGATGTTTGCAAACCATACGATACACAGAAGTG[CG]TACATTGTAAAGTAAGTCTTGCAGGGATGGTGATGAAAACGTACAAATGATTTGTGGCTA	0.548531	0.715923	0.500102	0.458	0.563698	0.880628	0.847785	0.844861	0.877117	0.881552	0.707225	0.501593	0.458744	0.648219	0.686988	0.856842	0.870036	0.865228	0.877561	0.86721	0.865931	0.884597	0.826723	0.872253
cg05434287	MAD1L1	TGAGCTGGGAAATGCTTTCTCCTCAGAAAAAAACAGCCCAGCCGGAGGGCATGTCCCGGC[CG]AATGTTCGCCTGATGCACCGCCCCTGGGATGAGGCCGCTGCAGAACCAGAGCAGCTGTGC	0.664439	0.702859	0.553074	0.498314	0.719603	0.929412	0.860651	0.938846	0.837072	0.698292	0.736972	0.602341	0.579224	0.779858	0.844752	0.940116	0.934323	0.946129	0.935245	0.933271	0.942808	0.936034	0.895836	0.955298
cg20277126	MEGF6	AGGGAAATCATAACACGATTAGCAGCTTCCGGCCAGTCTCACGGGCGTTAGCCTACTCCT[CG]CTCCTACACAAACACGGCAGGGCTCCCAGGCCCTGACATTGTCCTCCACGGCCGGGTGTC	0.568085	0.570142	0.536144	0.41128	0.444778	0.742038	0.823224	0.738421	0.83106	0.694657	0.534434	0.56973	0.436294	0.48989	0.496182	0.822162	0.813974	0.810911	0.799781	0.812378	0.794828	0.769336	0.702082	0.751856
cg00725159		TCTATGACAAATATGTCACTACTCTTGCCTTGGAATTTCTTTAAGGCTAAAGAGGAAAAT[CG]GTAAGTAATCACACGCAGTGGTCAGTGAGGATTGAAGAGGTAGCCATTTGGTCTAACCTT	0.665718	0.707159	0.577254	0.512896	0.571195	0.844916	0.814685	0.907628	0.882891	0.868462	0.679896	0.551737	0.548771	0.607846	0.87878	0.834789	0.8618	0.860188	0.839601	0.846494	0.838003	0.832045	0.846995	0.856384
cg17284168	SGK1	CGCTGGCTGTGACGAGGACGCTGTCAGGGGACTTGCCAATGGAGTTGGGGACAGGCTCTT[CG]GTAAACTCGGGGTCAAAGTGCCGTAGGTCGTTGGGCCCACTCTGTGACGGGAAGGGAAAA	0.64695	0.671455	0.537779	0.406079	0.568434	0.89067	0.75032	0.903362	0.913257	0.758201	0.686192	0.543698	0.407018	0.679752	0.434065	0.879626	0.901289	0.893781	0.871195	0.892063	0.883729	0.894744	0.858965	0.904365
cg08271909		TGGGAAGATGAGGTGCAGAAGTAAGCTGGGACCTGTGAGCCTCAATTTCGGCCTCTTCTG[CG]CTGAGACCCAAGCGGATCTTGCTTGGCCTGTATGCGTTACTGGGGGAAATGGACGTGGGC	0.604085	0.66923	0.682977	0.666698	0.628447	0.852508	0.847615	0.857063	0.8565	0.891953	0.662716	0.680042	0.706918	0.58268	0.906783	0.347803	0.343334	0.34876	0.332536	0.344361	0.317389	0.382413	0.540286	0.400328
cg02792780	STAB1	TGGCGGGTTCCTGTGGGGGTGAGCTGGCGGGGCCTCCGGGCTGCTTTTAAGGCCACTGCC[CG]CCCCGTCCCGCCTGCCTGTGCTGTGCCTGCCTCCTAGAGCTCATTCCCTACGCCCCGACT	0.576969	0.621543	0.664099	0.57188	0.614146	0.836121	0.75531	0.830488	0.841254	0.835382	0.660224	0.6576	0.578864	0.61387	0.77294	0.742762	0.720469	0.722811	0.742411	0.770217	0.710242	0.73594	0.711703	0.742637
cg01108476	TCP11	TTCTTCAGGCTGTTTGGACAGCCGAGAAGCCGAGCCACACCCAGGAGGGTTGTTTCACAG[CG]TGTGCCGCAGGGGCGCAGGGGCCGCGCTCTTTCCTCACATGTGGGAGAAGCGGAGGAGCC	0.577755	0.679099	0.61079	0.603104	0.601722	0.839662	0.852895	0.813954	0.848409	0.730842	0.656957	0.653181	0.610067	0.612108	0.710467	0.669948	0.609604	0.651119	0.66084	0.705566	0.66905	0.736773	0.721123	0.746838
cg05747695	OSBPL5	AATGCCCAGGCCAGATGGACATGTGGGGCTCTCGGGGACTGCAGGTGGCCGTGATGGTGT[CG]TGCAGCTGCTGCACTCCTGAGACCACAGCTAAGACACCGCCCCGTGGTGGCAGCGCCTGG	0.607064	0.588427	0.612515	0.532762	0.502896	0.82801	0.797746	0.843211	0.733025	0.842168	0.568889	0.648256	0.559027	0.504734	0.839072	0.754798	0.765158	0.753741	0.746974	0.757978	0.753044	0.732872	0.699801	0.774304
cg15074524		CACGTCGTGCCTGGCCTAGACCAGGCAGGTGGCAGATACGGGCCCAAGCAGGCCCTGCCA[CG]ATGATGAAGATGACAATGAAGCCACAGAACCCTCCCGGTTGCCGCATGGGAGCCGGCTGG	0.525913	0.614247	0.457333	0.34533	0.464429	0.727947	0.791415	0.793093	0.856811	0.781789	0.594975	0.459126	0.35537	0.47869	0.838979	0.813703	0.80685	0.820243	0.785283	0.824848	0.793207	0.802993	0.762909	0.77479
cg00034336		TGGAGCTGTTAAGACTCGGCCCTCGCCTGCTCCCGGGCACCTCAGGGCCATCGAAGGGCG[CG]TGCACCTGAGATGCTGCGGTGCTCGCGTCACGCAATGACCCCGCAGCAGGCACCAGCCAC	0.786975	0.649574	0.574399	0.585558	0.551025	0.83146	0.841791	0.962077	0.959428	0.958908	0.610215	0.608031	0.579345	0.555013	0.947964	0.943993	0.945283	0.94648	0.948525	0.944252	0.923457	0.935239	0.890928	0.931778
cg05199904		AGGAAAACACCCGTGCCATCTTTCTGCTCAGCATAGCACTGAGGAAGGTGGTCCCAGGAC[CG]TCTGTACCTATCTATCACCCTCAGGTCTGGACTCCACGCTGTGATTCATCACCACGCCCT	0.598242	0.611164	0.631446	0.567545	0.453522	0.86664	0.843113	0.849638	0.771026	0.614355	0.639308	0.628331	0.559369	0.523222	0.813305	0.806659	0.804642	0.838063	0.797728	0.7805	0.809108	0.806832	0.76637	0.790804
cg22410724		GTGCAGTGCCTGGGCCCCATGGCTGAGTCCTTACTCGCATGCTTGCCAGGGCATTGCTCC[CG]GCACGAGGCCGCCCGCCTGCAGCAGGCCCGCAGGGGCACGGTGGGTCCCCGCCCGCTCCT	0.665605	0.686652	0.593216	0.558301	0.527825	0.814432	0.821215	0.838767	0.77491	0.666806	0.680749	0.599711	0.554216	0.559873	0.535814	0.8327	0.833681	0.835717	0.839699	0.83091	0.824461	0.846814	0.782779	0.846547
cg03078141		GGAGGTGTCAGGGAAAAGCAAGAGTCAAGAATGATGTTTTGGCTCTCGGGTTGGCAATTG[CG]GATGGTGGTACCACTAACTGAGACTGGAGACAGATGAAGAGGCACAAAGTGGGAGGGAAA	0.469353	0.652137	0.462526	0.414417	0.505665	0.823128	0.834711	0.825668	0.721285	0.583744	0.615937	0.482246	0.411259	0.573227	0.839499	0.760678	0.755726	0.742702	0.735904	0.779855	0.748126	0.774556	0.764077	0.777401
cg11855693	ELK3	TTGGCAGAGGCAGTTCTATTTCTAGGTAATGAATGGACCTTACGGAAGATTGGTCTCTTC[CG]CCCGAAGAGCTAGAAATAACTGTTCTCAAGCAAGGCCCATGCTTTCTCAGCACAGAGCTG	0.63357	0.764038	0.629315	0.635462	0.696387	0.825634	0.865986	0.90929	0.909682	0.898288	0.749291	0.725818	0.693221	0.752314	0.87996	0.884691	0.880156	0.864605	0.857501	0.880774	0.845122	0.884599	0.821435	0.888741
cg08579780		ACTTATGTGAGATCACACAGTTAGTCAGTGCACCAGACTAGAACTCAGTTCTAGGTGCAT[CG]GATCCCAAGCCAGCAATCTTAAAAACACATTATGTTGCCTCAGGAGTAATCACGACACCA	0.522748	0.754709	0.538	0.54456	0.568128	0.912266	0.909613	0.890374	0.865639	0.253028	0.707309	0.517763	0.564491	0.705328	0.447539	0.88369	0.888116	0.878138	0.88814	0.873162	0.875413	0.883196	0.848355	0.899062
cg11104416	LOC100130872	AATTCATAGACCTTTGTTGCTGCATATAAACTTGAGGATAAACTTGTTGAATTTGTTCAA[CG]TAAGCAGCTGAAATTCTGCGTGGGGTGGTGATGAACGGCTCTAGCACTCGGTAAAAGGTA	0.481295	0.71146	0.519239	0.386778	0.59321	0.876578	0.841859	0.835875	0.942402	0.76609	0.681211	0.516654	0.423782	0.636987	0.713193	0.896005	0.898321	0.926458	0.89479	0.896064	0.90057	0.91362	0.896979	0.894098
cg14398243	PRKCE	GTCACTTGACTGCAGGGCCAGGCCAGGATTTCCATGACTCTAGCCACTGAGCTGTGTCTC[CG]AGGGCTACTGCCTATGTGAAGGTGATGCAGAACTTTAGAGAAGGCCATTTGTATCATAGA	0.381487	0.543713	0.443562	0.465868	0.516293	0.779411	0.741726	0.707708	0.790823	0.584496	0.569861	0.450871	0.478638	0.539329	0.784308	0.678333	0.682545	0.687408	0.672128	0.697194	0.665401	0.696725	0.633857	0.688827
cg10333311	SLC6A18	TGCCGGGGGCTCCTGTGTGGGCCATGCTCTTCTTCGGGATGCTGTTCACCTTGGGGCTAT[CG]ACCATGTTCGGGACCGTGGAGGCGGTCATCACACCCCTGCTGGACGTGGGGGTCCTGCCT	0.704322	0.595146	0.601467	0.591233	0.479729	0.804566	0.76229	0.812252	0.834102	0.474892	0.597841	0.634886	0.610002	0.535719	0.46214	0.839322	0.846014	0.843649	0.817232	0.839672	0.844799	0.846638	0.807208	0.859232
cg04915618	KALRN	GGTCATAATCTTAGCATCAGATGGTCTCAATCTCTGTATTTAATTAGAGCAGCCTGGAAC[CG]TGTGGTTTTGAGCTCTAGAAACCAGAATTCAGATGAAGAAGGAATGTGAGGGGCCAGGGA	0.671643	0.53096	0.623439	0.489741	0.51603	0.869442	0.852058	0.832053	0.848667	0.477422	0.596347	0.691564	0.578545	0.618153	0.864034	0.308582	0.342992	0.377219	0.352206	0.351724	0.380657	0.31911	0.360867	0.264883
cg26896569	LOC400752	GAATCACTTGAACCCCGGAGGCGGAGGATGCAATTAGCCGAGATCGTGCCATTGCCTGGG[CG]ACAGAGCAAGACTTCTGTTTAAAAAAAAAAAAAATCATGGTAGGGCCGGGCACGGTGGCT	0.754984	0.807973	0.736954	0.614343	0.651519	0.912674	0.946365	0.940147	0.908786	0.921491	0.825807	0.715283	0.57671	0.693491	0.91442	0.952684	0.951119	0.962998	0.953295	0.938558	0.951639	0.947055	0.950871	0.944957
cg23445003	CUX1	CTTCAACAAGAAAATTTTGTAATGAGCCGGAGGAAATGGTCTCATCATTACTACGTTATA[CG]CAGTCTGAGAGTCTGCGTGGATTTTTATTTCACAAGAATGTGACTGTTTAATTGAAAAAT	0.240681	0.619702	0.361101	0.19132	0.448843	0.848105	0.771442	0.753326	0.834945	0.38589	0.637853	0.330257	0.187744	0.585156	0.579483	0.889303	0.892752	0.88515	0.875525	0.89298	0.88477	0.882435	0.864785	0.888808
cg17403881		GCCTGGCGTAGACCGGGTGGGGGCGGTGCAGACAGGACCCTGGAGAACAGGGCTGCGGTG[CG]CAGCAGGGGGTGGCCCCGGTCACACAGTGTCCCCCATGGAGGGGCCTCGATGGCCGGGCT	0.752408	0.809979	0.712071	0.678978	0.664826	0.922651	0.924785	0.951419	0.925594	0.510581	0.736109	0.709081	0.669538	0.7196	0.802411	0.908786	0.906086	0.930783	0.916395	0.922099	0.885381	0.892442	0.893101	0.925592
cg24008892	PMF1	GTTGTCTTGTGCAGTATTTTACAGCCCCTCTTGTGTTTTTCTTTATTTCTCGTACACACA[CG]CAGTTTTAAGGGTGATGTGTGTATAATTAAAAGGACCCTTGGCCCATACTTTCCTAATTC	0.578522	0.60934	0.626949	0.582623	0.707856	0.861095	0.768663	0.821522	0.848051	0.736492	0.606836	0.660704	0.587913	0.643148	0.541735	0.782774	0.774916	0.786869	0.775176	0.782728	0.760251	0.779461	0.777488	0.775941
cg23155767	GPR1	CTCATGAAAAAATTAGCAGATCTGGGTACACTGGGCCCATGTCCCAACAGGGATACTGTT[CG]AGGTGTCTGCGTAGTGGCTTACTCCCAGCACCACCTGCCCGCTTTTGGCAGGGCATTGCA	0.495816	0.709243	0.512882	0.379676	0.530603	0.902888	0.842142	0.74819	0.926735	0.927373	0.700266	0.530178	0.4295	0.637589	0.857206	0.886678	0.85996	0.896092	0.855956	0.857004	0.8464	0.870065	0.869401	0.885522
cg05722439	RFX1	GCCCCCTTCTTGAGCTTGGGGGCAAGGGAGGGCCCAGCGCTGGAGAAGATGCGACACCCA[CG]GCTTTAATTGCACTTAATACCAAGAAGGGGAAGCAGTGGGGTTGCTGGGGGTAGGGTGTC	0.454593	0.602857	0.535207	0.413789	0.564573	0.840019	0.818882	0.802983	0.848041	0.876233	0.620791	0.532245	0.432718	0.544756	0.87595	0.489275	0.450923	0.537344	0.474698	0.612833	0.511443	0.751575	0.728437	0.827397
cg12819431		GGTATTAATTAGCAAGTGCTGCCTAAGAGGGTTATTTAGAACATAAGTGCTTGGCCAGAG[CG]TCTGCTGGTGCCGCCCCAAGCGCTACACATCTTGTACACATTATCGACATGTAGGAGCGG	0.412849	0.665776	0.439876	0.3117	0.496803	0.856579	0.852914	0.846541	0.71856	0.491155	0.667382	0.474822	0.344008	0.592808	0.829181	0.860752	0.820886	0.842691	0.859556	0.855418	0.825107	0.878849	0.82752	0.852286
cg08805041	PIGQ	GCTGAGGTGGGAGTGTGATGGGCGTTTGCCCCACAGTACGTTGAGTTTTCTCTCACTACT[CG]ACAGAGAAGAGTAGCTTCTGCCCTCCCATCTCCTTCGGTAGACACAAGGCACTTTTTTTT	0.612412	0.584408	0.657018	0.597848	0.459644	0.866301	0.822648	0.873299	0.845284	0.600919	0.584978	0.671901	0.608395	0.499918	0.579343	0.832626	0.811689	0.856341	0.829729	0.838068	0.79673	0.813245	0.779679	0.822068
cg24074783		CTGGGCTTAACTCACTGGGGCCTCCCCCGGGTGGCCGAGGTTCTTTTCCCACGCCCTGCC[CG]ACAGCTGCTCTCCAGCTGTCCTCCTTGGAAGCTGTCCAGTGCCGGGAGAGCTCTGGGCCT	0.66847	0.747052	0.675067	0.621844	0.578018	0.867209	0.852786	0.861888	0.896035	0.654359	0.734663	0.681739	0.618188	0.647129	0.792349	0.861021	0.87353	0.867012	0.843824	0.861687	0.845266	0.849235	0.831504	0.865209
cg26030470	PLEKHG5	GCACCTACCCCCGAGGTCCTCGATGATGTCCAGGGTGGAGCTCCACGAGAAACGCTCCAC[CG]TCCCCAGCTCCAGCTCGGCCAGGTCGCCGGGCAGGGCCTCCAGCTCGTAGGTGCCCCGCT	0.621014	0.748467	0.638076	0.44583	0.637869	0.916743	0.909212	0.916557	0.961869	0.937109	0.710751	0.630174	0.455591	0.685504	0.942664	0.934495	0.939825	0.948526	0.948041	0.934506	0.937567	0.946856	0.9226	0.949582
cg15895886		GGGTGCAACTGGAAGAGAATGAAAGGATGGGAAAATACCAGAATGGGGAAAATACATTTG[CG]GGAAAAATTTTGTGTGCAAATAGAAGCAATTACAACCAGGTAACACCCCTCCCCCTACAC	0.681563	0.664862	0.730415	0.558386	0.568968	0.873466	0.867669	0.871558	0.86392	0.33518	0.695545	0.741432	0.569234	0.640843	0.599421	0.886053	0.848975	0.87672	0.869914	0.856949	0.842685	0.890706	0.838235	0.873585
cg22808839	ITPK1	GCCCGGGCACCACCCACGCTCCAAGTCCGGGCGCCGCCCACGCTCCGAGGGACCCACACC[CG]GATATCACCCACGCTCTGAGGGACCCACGCCTGGATATCACCCACGCTCTGAGGCCTACA	0.599317	0.643422	0.551552	0.374625	0.479196	0.858204	0.834035	0.861932	0.738296	0.767336	0.635449	0.539467	0.418513	0.536452	0.495527	0.839429	0.84262	0.846704	0.864722	0.864109	0.846799	0.84181	0.823457	0.862414
cg27405400	BIN1	TTCCTCCCAGCAGAGCCTGCGGTCGGGGGCCACGGAGGCAGGATGCACACCCTCGTGCCC[CG]GCGTTCTCACACCGAGGCTCCCCAGGCAGGCAGACACAGACAGAGGACAGGCAGGCGGGC	0.44564	0.694387	0.478473	0.297783	0.49988	0.932346	0.938518	0.857132	0.792875	0.908978	0.687321	0.480148	0.280328	0.595455	0.926288	0.882576	0.867821	0.895821	0.87366	0.882124	0.851232	0.884329	0.900415	0.913473
cg07918736	ILF3	GGCCCTGCCTCAGTCCTGCCACTCCTCCCATGTGACTGGAATGCCCATAGCTGAGTTTGT[CG]GTCTTCTTTTCTGTTTTCCCTGAGAACGTAAAACAGCAGGGGCCGATCCTGACAAAGCAC	0.563437	0.628472	0.669444	0.686741	0.586641	0.889611	0.753029	0.936152	0.84745	0.634467	0.653906	0.673021	0.67559	0.577566	0.863576	0.818194	0.806809	0.841356	0.803431	0.812301	0.808419	0.805626	0.761425	0.806088
cg26987720	BAIAP2	CCCACAGGCTGCTGCCTTGGGCAGGCCCGCTGGCGTGTTTGCTGCAGGTCTGGTGATGCC[CG]GGCGGCTGGAGTTTCTCGAGGCACCGCTGTGCTGACAGACTGGGGAGGAGAGGAGGAGGC	0.538288	0.668862	0.499408	0.38903	0.521421	0.817726	0.721816	0.804699	0.836559	0.826642	0.615807	0.510249	0.39583	0.577527	0.843554	0.812959	0.817963	0.79729	0.825792	0.814574	0.809509	0.83179	0.799092	0.822557
cg24808901	RWDD3	CTCCTGTGAAGGCAAGAGACAAACGAGGAGCGTTATGACACTTTGCTCCCAGGACTTTGG[CG]CACAGTTCCCATGAGTCCAGGTCCGTCCAGTCAACATCCTGAAGCCAGGACTGGCAGGTC	0.387891	0.278964	0.297965	0.217123	0.328094	0.604526	0.456645	0.470074	0.546195	0.0884643	0.245013	0.309065	0.222856	0.279869	0.100897	0.630442	0.597909	0.522223	0.567343	0.60341	0.630902	0.519804	0.528249	0.702773
cg06550582		AATTTCTGAATAAAGTCCTTTCTACCAGCTGCTGCTGTGTGGTCACTCTGCGGGTCCCCA[CG]GTGACCTCTGCAGGTCGACACGTTTTCCTTCATGGCCGCACGAAGGCCCCTTACAGGTGC	0.538905	0.472565	0.51603	0.501957	0.39145	0.743288	0.675679	0.737029	0.692182	0.32267	0.484104	0.514996	0.482547	0.395212	0.43654	0.690741	0.690981	0.660058	0.700082	0.690678	0.66495	0.702614	0.623838	0.709003
[truncated: 588 more rows]
