# Supplementary material for: Pluripotent stem cells escape from senescence-associated DNA methylation changes
Source: HighWire-hosted journal article supplement (doi:10.1101/gr.141945.112), 2012-10-18
Supplement: Supplemental_table_2.xlsx [file Supplemental_table_2.xlsx]

## Sheet: Tabelle1
			Beta-values:
TargetID	UCSC_REFGENE_NAME	FORWARD_SEQUENCE	MSC donor2 P2	MSC donor4 P2	MSC donor5 P2	MSC donor6 P2	MSC donor11 P3	MSC donor2 P7	MSC donor4 P12	MSC donor5 P16	MSC donor6 P14	MSC donor11 P14 GFP	MSC donor4 P3 15Gy	MSC donor5 P3 15Gy	MSC donor6 P3 15Gy	MSC donor11 P3 15Gy	MSC donor11 P14 hTERT	iP-MSC donor2 cloneA	iP-MSC donor2 cloneB	iP-MSC donor4 cloneA	iP-MSC donor4 cloneB	iP-MSC donor5 cloneA	iP-MSC donor5 cloneB	ESC H1	ESC H9	ESC HES2
cg01637175	KCNJ12	CTCTGAGATGCCAAAGGAGAGCCGGTCCCTGGCCGCGCGGCTGGACCCCAGCCTCCCTCG[CG]CTGCGCTGCACCTCCGCGGCCCCTCCTCGCGCAGCTCCGCCCTGGACCGCCGCCCTGTGG	0.498991	0.519909	0.490291	0.509157	0.499213	0.158703	0.105962	0.283153	0.147658	0.47504	0.518691	0.511942	0.525564	0.527793	0.203003	0.0662132	0.0705135	0.0595674	0.0660514	0.0794629	0.051747	0.0583294	0.0709817	0.0657484
cg25483123		TGCTGGGACATGGCGGCAAGGCTCATTTGCTGCCTTCTCACAAAGTGGAATGGGAGAATT[CG]TTGCACGGTATTAACCAATTGGTTGCCTAGTAGTCTGGTGAAGTGTATTAAGGACATTAC	0.438867	0.407309	0.423611	0.425571	0.421794	0.221902	0.125514	0.171382	0.0738715	0.0726435	0.417841	0.407751	0.41049	0.371633	0.0840279	0.80447	0.815816	0.805335	0.822784	0.787212	0.792633	0.789382	0.781577	0.799387
cg05497273	A2BP1	GCCAGAGAGTAAACATTTTAGACTTCCTGGGCCACTTGGTCTCTCACAGACACTAAACTC[CG]CATTTGCAGATGAAGGCAGTCGTAGCAACCCATAAACAAATGGGCATAGCTATGTTTCAA	0.549278	0.555211	0.551546	0.534744	0.536716	0.263644	0.317146	0.1948	0.310339	0.21636	0.564813	0.547081	0.580394	0.534598	0.238466	0.775866	0.816851	0.601526	0.870878	0.883074	0.862699	0.870303	0.855942	0.878081
cg01238639		TATATTTCATGTCCCAAGAAAATGCTCCCAAATCAATTTATTCTTGCTTATTCAGGCTCA[CG]TTTTGGCCCCCTTGGTCAAGCTCCTGAAGAATCTCATTCCAAGAGTATGTATCTGGCTCT	0.417398	0.421014	0.418797	0.420609	0.407325	0.0742001	0.168714	0.280046	0.137347	0.179343	0.449107	0.449431	0.400548	0.415827	0.192104	0.826048	0.832417	0.815511	0.803433	0.805646	0.804671	0.809285	0.77897	0.823823
cg13379339		CAAACCTCAAAGAGTCCTCCCAAAGGAAAACGCACCAGCTAAGCCAGGTGCCTCCAGGCT[CG]TATAAAGGGGAAGGTGAGGTCAGGAGGCCAACAGCCATTTTTTAGAAGAATGACACCGCA	0.46782	0.439615	0.452631	0.470038	0.44017	0.166531	0.219109	0.249662	0.213564	0.316299	0.515081	0.482878	0.490392	0.485943	0.559957	0.802169	0.792584	0.812839	0.796228	0.797588	0.803608	0.803502	0.782761	0.803703
cg24648385		CGACCAGGCGTCGGCCCCTCCGCCTCCGCCTGGCCCTGTGCTCCCCGGGGCCCAGCGCCC[CG]AACACAACCCCAGGGACTCACGGCATTTGATGTGGCCCCCAGCGGCCCGCAGCTCCAGCC	0.382466	0.3394	0.38574	0.374866	0.353012	0.104177	0.129708	0.107775	0.137213	0.338216	0.335601	0.394251	0.378018	0.340974	0.425801	0.79285	0.705954	0.73015	0.805407	0.836325	0.840166	0.851655	0.820564	0.864259
cg27313201	TPM3	GGAGAGGAAGGAGTGGAAAATGGGGGGGGGGTGGGCAAGTGAATAAGGGGGAGAAAAATA[CG]AGGACAAGAAAAGGCAAAGAAATGTCCCTTCTAGTATAAGGGGACAAGAAATAGAAAGAT	0.465485	0.483126	0.46423	0.46618	0.461264	0.324325	0.244087	0.230835	0.148271	0.281692	0.486584	0.45253	0.448707	0.502223	0.453571	0.784882	0.78816	0.787449	0.76935	0.770864	0.747889	0.758237	0.733046	0.757621
cg19410046	CHN2	ATCTGGCCACCAACTCCTTGTAGCATCAGGAGCAGCAGGAGTCTGGAGAAGCAGGGGAAT[CG]TGGAGACCATCTCATGCAACCCTTCTGTTTTGCAGGACAGGAAACTGAGGCACCCGGCTC	0.484627	0.490752	0.502238	0.486256	0.464386	0.215176	0.343325	0.172124	0.187115	0.247808	0.529773	0.524077	0.501482	0.524238	0.225912	0.812441	0.807549	0.822358	0.809259	0.826968	0.790386	0.818691	0.794121	0.815992
cg07196505	A2BP1	TCTCTTCATTTTCCTCTAGGTTGGCCTCACGTGTAGGGAGGTCCCCTTCAAGTGGCAGTT[CG]TTGTTGTTGTTGTTGTTGTTGTTGTTGAGACGGAATCTTGCTCTGTGGCCCAGGCTGGAG	0.358589	0.34532	0.351409	0.392611	0.349663	0.0873098	0.194361	0.101432	0.163029	0.120466	0.400873	0.368722	0.382886	0.37438	0.12292	0.858957	0.851424	0.771626	0.847999	0.857603	0.840527	0.851038	0.802049	0.843516
cg11666098		AAATATATTAATCAGAAAGGAAAGTAAAACTTAGAAGTATGCTAATTGTCTTGTGCTTTG[CG]AAATAGATGGAATGAGACCACTTAGAATAGAATGAGGCTTTGTTCTTAATTGCTGTCAGG	0.528345	0.497213	0.507384	0.480611	0.519436	0.172868	0.295019	0.17725	0.399951	0.293316	0.490214	0.55177	0.550621	0.527701	0.209218	0.875812	0.895314	0.864745	0.868169	0.889083	0.876105	0.881431	0.861096	0.86427
cg00859330	AJAP1	GATATTAACTTTAATGCTAACGTTAAATTGCCTCCTTCTGTGCTGAGTCTTCAGAGCACT[CG]GGCTGCTGAGGGGAGAGAGCATTGCGCCCTCATGGCTGCACATCCCATGCATTCTATAAG	0.416788	0.449167	0.426697	0.44382	0.416228	0.127289	0.318887	0.154246	0.182045	0.205163	0.486885	0.435148	0.451704	0.51311	0.262755	0.846716	0.842549	0.829049	0.827546	0.850454	0.810312	0.828023	0.79135	0.835878
cg26810908	ZP4	GAGTTGGGGCCCTTGAGAAGCCTTGTCACCTTCTCCATCCATTCTAGAAAAGTTTCTGTA[CG]ATTAGAGCCTGTCTTGAAATTCTAGAAAAAAATCTAAACTTATTTCCTGAGAAAGGTTGA	0.464081	0.408383	0.442867	0.464484	0.418664	0.200148	0.288629	0.168852	0.186444	0.194372	0.397685	0.447228	0.484567	0.4314	0.16423	0.872349	0.852595	0.867702	0.851243	0.870837	0.865953	0.868101	0.861252	0.887859
cg05211947	ATP8A1	CAAAAGAGGAGACTGGGCATATTCATCATATTCATGAACCTACTTTAGGTCTTAGGAAGA[CG]GAGTTTAAACAATTTATACGTAAATATGGGGAAGATTCCTTGACAAGAAACTCAGGAAGG	0.831844	0.855646	0.861534	0.865672	0.855252	0.597284	0.581613	0.525621	0.723314	0.52629	0.862084	0.888109	0.856348	0.836194	0.501834	0.292904	0.304175	0.26918	0.205244	0.265768	0.209148	0.467339	0.401613	0.425631
cg01920563	CHRM2	GCACTGCAATGGGTCAAGGATGCTTTGCCAGAAAAGATGTTCATAGGATTTCAGGAAGAA[CG]TAATTTACTGACAAGACTTAAGGGCTCTAGGGTTTCAGATGGTTTGTTTTCAAGGATGAA	0.598943	0.582672	0.573848	0.591684	0.573018	0.3153	0.328999	0.268802	0.191708	0.133412	0.624928	0.576352	0.595275	0.55388	0.0980323	0.855954	0.867368	0.86988	0.880654	0.876242	0.873019	0.870187	0.850843	0.887188
cg15088574		ACACCTGTAAACGCACAGCCCATGCCCCATTGTAAAGGTGACTGAAGAGAATGGTCAACT[CG]GTGGTGATGGGCCTGTTTTGGAGCTAAAAGCATAAAATGAATCCTCCCTGTAGCTCCATT	0.407625	0.371455	0.428445	0.427777	0.409271	0.0899311	0.201071	0.181286	0.248853	0.23034	0.387812	0.427534	0.41456	0.390686	0.443213	0.848516	0.816251	0.705454	0.810996	0.835033	0.82109	0.829653	0.804739	0.843501
cg05788927	LUZP2	GCCATGTCAGTAATGACCCCAGCTCCTTCCAGCTTGTTGCTCTGTTGAGGTCTTTGCCCT[CG]TGATCCAAGGTGGCCACGAGAGTTCAAATCATCCTTCTAAATAGCAGCATGGAGGAAGGA	0.47557	0.417388	0.453117	0.464934	0.430008	0.254588	0.148464	0.101698	0.30532	0.106997	0.487853	0.473878	0.473377	0.473152	0.19312	0.887669	0.865254	0.847436	0.836456	0.881654	0.832602	0.873846	0.84396	0.87979
cg10027639		AGAGGAACACCATGCCAACATGTACAGAAGTAACTTACTTAGTCCTGGCAAGCTCTCAGC[CG]AGCTTCATTGTTGGAGAATCAAGTGGAAACACATAAGGGAAGATATAAAGCTTCCATTCA	0.443994	0.423216	0.452878	0.435858	0.40484	0.206293	0.249556	0.17741	0.278623	0.114277	0.512956	0.446484	0.447829	0.488693	0.165498	0.869321	0.810499	0.847256	0.863661	0.879359	0.814239	0.834739	0.824815	0.878785
cg24875595	REG1P	GAGAATGAGTTTATCTGTGAATGCCTGAAACACACAGGAAATTCAGCTTTAAGCTTATCT[CG]AAGAACCTATGGAGAACCTTGATATCCTTTACATTATATGATTTATAGAGAGGTTGCTTT	0.51551	0.49752	0.540262	0.518595	0.522588	0.217203	0.373667	0.306817	0.244875	0.139043	0.564872	0.581418	0.48107	0.518236	0.271424	0.875761	0.842905	0.840033	0.853284	0.885794	0.860163	0.87262	0.841854	0.89287
cg00277753	GPR123	CAGCTCTGCAAGTGTTTAACAAGAAATAACAAGAAAACGGCTGTCCCCGAGAAGCAGCTG[CG]TGAACTCAGGACGCTCCTGAGCAGCCGACGTTTTGAGAAAGCCCTCGCCATCCTGAAGGC	0.477037	0.439295	0.481299	0.474593	0.439634	0.104997	0.222253	0.216786	0.121805	0.845364	0.441325	0.496024	0.464488	0.382424	0.673453	0.906492	0.903302	0.930599	0.901478	0.902435	0.900538	0.904477	0.852854	0.904713
cg16460727	CPLX2	GGTTCACCAATGGCCTCTGACTGGTGGGGGGGTCTCCTGCTTTAAGGCCTCTGCTGTGAT[CG]TGTGTGAAGGGATAAGTTCTCCCTCACTGGAACAAAATCACATTTCTGCAGCTCTTGTTG	0.528733	0.518714	0.520728	0.521583	0.492812	0.323343	0.304234	0.202885	0.360637	0.261184	0.524046	0.529094	0.541349	0.48562	0.466953	0.816413	0.802017	0.826148	0.821911	0.824278	0.808226	0.803755	0.774959	0.80569
cg19989498		CATTGGCAAGACAGTGAAAGCATTTGCAGATATTCAGCATGAGAGAGAGAAAAAGAAAAG[CG]AATTTGAATTTTGAAAAATTTTACTCTGGTCACAGTGTGGCAACCAGCTTGGTGAGGAGC	0.418252	0.444057	0.402656	0.424	0.394591	0.069115	0.270125	0.130507	0.276467	0.0912783	0.464697	0.404831	0.444936	0.432687	0.166555	0.848579	0.852565	0.851566	0.85982	0.82736	0.814967	0.8402	0.784694	0.828669
cg14354327		GCCCAGCTCCTGTAGCCGGGACTCCGCGCCCAGGAGCGCGGCCCGCCCAAAGGACGTCTG[CG]CGACACGGAGCAGAGACCCAGGGGACGACCAGGAACTGTCCTAGGCACTTCCCTGCCAAG	0.508036	0.459912	0.435798	0.464271	0.46703	0.193527	0.200666	0.191682	0.383157	0.685538	0.371752	0.474412	0.46179	0.422571	0.677657	0.0707079	0.0676668	0.0514973	0.0744315	0.0742724	0.0642065	0.068887	0.0639187	0.0892526
cg13840174	IGSF21	AATCTTCGTTGCTGAAAATATACAAGACTCATCTCCAGTTGTTTGTATGGACTGGGTGGG[CG]AGGGCAGGGGATGGGCACGATGACCTGTGCTTGTCCTTTCCCCTATGTCCTTTGAACCTT	0.425538	0.390469	0.39844	0.440515	0.428925	0.193696	0.167367	0.212296	0.232987	0.171524	0.432223	0.403647	0.444729	0.440268	0.111856	0.813724	0.795097	0.823462	0.798903	0.825456	0.789442	0.815503	0.771197	0.809025
cg21336434	HPVC1	TTTAGAGAAGTCCTGGGACTCAGACTGCCCCAGCACTGATTGTTTCTACAGCATCCTTCA[CG]CACCTGCAAATGCAGCCTGCACCATTCATGGCCAGTTCTGTTGTCCTCTGCTATCCCTCT	0.512174	0.542246	0.551175	0.527699	0.541932	0.0978065	0.277839	0.262956	0.236388	0.170945	0.559269	0.569987	0.535541	0.584654	0.266889	0.840208	0.845315	0.754886	0.853665	0.83875	0.824209	0.831602	0.81765	0.856303
cg17325792	ST6GALNAC3	GCCATTTCTTCTCCATTCCCATGATATCCAGTACAGAGTGACCATGCAGTGTTGATTGAT[CG]AACAGCAACCACCACATACATGTCCTGCCCCACCACAAAAGGAAGGAAGGAATAAAAGAA	0.586555	0.585338	0.622381	0.603291	0.607368	0.327236	0.318813	0.212421	0.338054	0.455918	0.632614	0.664167	0.60375	0.659273	0.566474	0.856936	0.857502	0.824943	0.849346	0.867632	0.866418	0.865931	0.861716	0.887288
cg19219255		CAGCAGTTGCTCTTGGTCTTTAAAAGATCTCGTCTTTGTAGCACAGAACAACCTAAGCCT[CG]AGGCCAGCTAACTGAAGTCAGGATTTATTATGGAGAGAAAGTGCAAGGCACTGCCGCCTG	0.589246	0.577322	0.580066	0.590437	0.579754	0.439864	0.361427	0.376113	0.352819	0.295999	0.592823	0.62715	0.607141	0.620445	0.358013	0.853406	0.836034	0.841531	0.830743	0.843912	0.82342	0.820142	0.810361	0.851326
cg18601057	RYR1	CCACTGCACTCCAGCCTGGGCAACAGAGCAAGATGCCATCTCAAAAAATAGAATTCTGAA[CG]TGGGAGGAATCCCAGACTCACCCAGGAGGCTTCTGACATGCCTCTTTCTTTCTTTCCTTC	0.367726	0.33504	0.408947	0.392984	0.341611	0.121889	0.142524	0.141232	0.139066	0.133632	0.386569	0.382138	0.40432	0.380655	0.149754	0.832209	0.850274	0.845196	0.825404	0.838445	0.819546	0.805851	0.796428	0.803268
cg00676085	KRT72	TATCTGAAACTGTTCTTTAAGCCTGTCCTCACAATCTGTGTGCTCTCTGAGGTCAGGGAC[CG]TGTCTCCTCCTTCCTTAGGTTCTCCATGCAGGGCTTGGGCCAGGGTTCTGCTTTGAAGGA	0.375594	0.400045	0.408019	0.402237	0.368476	0.15492	0.280242	0.0880412	0.213932	0.0867448	0.43328	0.418928	0.41412	0.380404	0.152332	0.803055	0.82125	0.827341	0.812923	0.775267	0.799082	0.800028	0.740162	0.78654
cg27132732		CAGATAGGAGCAAGACACTTGAGCCTGTAGAGTTACAGAGCTTATGGGATGCCTCTGGCT[CG]CCTGCAGCCACCTCAGGTGACTAGCTTTAGGAAAAGACCAGACAATGCCTTGGGTCTAAA	0.464804	0.477033	0.486179	0.493175	0.449988	0.211081	0.144182	0.198956	0.195195	0.275753	0.511396	0.503423	0.516775	0.474345	0.13454	0.866176	0.840284	0.847764	0.841646	0.852081	0.83648	0.851832	0.801363	0.850579
cg08502159	BAT4	GGGAGAGGCAGAACACAATGAGACATGGGTCTGAGCTAAAGTTTCCCCTTACCGGTTTTC[CG]GGCTCCTTGTCTCTCCATGGCTCTCCCTGACCATGCGGGCTACCTCAGGGAAGCCAGCTT	0.356799	0.333229	0.331031	0.359266	0.401068	0.0625615	0.112707	0.072238	0.265154	0.430165	0.333602	0.323143	0.386029	0.320158	0.493792	0.779835	0.794229	0.786203	0.787574	0.78199	0.768716	0.79385	0.756681	0.798295
cg19436270	CSMD3	AAGGCAGGGTTTCTCTACCTTAAGCTTGACCCTATTGACATTTTCAGTCAAACAATTCTT[CG]TTGTGAGGGGCTGCTCTGTGCATTGTAGAATGTTCTGCAATATATCTCTGGCATCTGCCT	0.533937	0.492055	0.527014	0.51734	0.531671	0.218216	0.289304	0.205111	0.377669	0.128973	0.502816	0.524155	0.543873	0.53577	0.114926	0.87459	0.866611	0.846012	0.849181	0.860484	0.838089	0.860836	0.816021	0.85222
cg15626193		CCCCGACCTGTCCCCTGGGATCTCCTGGACTTCCCCCAAATCCAGCAACTCAAGGGTTAA[CG]CTCAGCATGGCAGGAGGGCTCAGGCTCCCCCATTGCCACCAGCCCTAGTACTGCCTTCAG	0.42427	0.404504	0.399046	0.474037	0.401597	0.242509	0.164737	0.26322	0.18995	0.163071	0.435535	0.45516	0.505928	0.400592	0.211188	0.837307	0.841883	0.853809	0.869379	0.84488	0.833536	0.831748	0.826442	0.833133
cg16819051		CAGAACTTTTCTCAGTCTCGCGCCATGGTAAGGTTCCCCGTGAAAAGAAGCTAGTTCAAA[CG]TGGCCAACATTCCCAATATCAGTAGGTAATGGGGGGGTTCTCCACGTTCCCCCAGGAAGC	0.538037	0.516417	0.520611	0.569933	0.5036	0.18633	0.233933	0.168804	0.321466	0.183241	0.543977	0.534303	0.610545	0.544835	0.280034	0.88876	0.887202	0.886459	0.893955	0.883409	0.876132	0.865788	0.867873	0.876247
cg14608275	NCEH1	AAAGGCTGATACCAGGGCTGGGGCTGTAAAGTACAAGATGAACCTGTTGTGCCAGAGATG[CG]GAAGTGCTCAAAAAATGATAGGAACTGGTCAAAGGTCCACAGCTGCCAGCTTGAAGGGTC	0.343151	0.344059	0.359611	0.355154	0.423277	0.151306	0.134177	0.166664	0.14848	0.279882	0.345863	0.365244	0.349601	0.38543	0.464483	0.84105	0.848713	0.859468	0.863389	0.832463	0.830704	0.836505	0.809192	0.852745
cg12377401		CAGTACCTACATCAAGACTTCAATTATAGGGCTTTTGAAACCATCAAGTATTCAGAACAA[CG]AAAATCAGGAATTTGAACAGCCAGATATGTGGGGTTCCGTTTATACCCATAGTTGCTTAA	0.527742	0.475999	0.533505	0.517123	0.511562	0.173036	0.231282	0.264373	0.0918585	0.334565	0.477709	0.578007	0.497203	0.4827	0.443496	0.87788	0.859364	0.845665	0.852943	0.845164	0.856805	0.853875	0.828755	0.863203
cg15507719	BRUNOL4	GGTAGTGCTTAGAGCAGACTGCAAGGAAATGCCTTTGGAAAGCCGGACTGCACCCACACC[CG]GGATGGTGCAAATATGCCAAGCCCAGCTATGGCTGGAGACTAAACCTGTTCCAGCAGAGG	0.300963	0.335765	0.361166	0.349724	0.400564	0.0788421	0.126237	0.210439	0.0908267	0.41278	0.317415	0.400467	0.351092	0.299353	0.212021	0.834274	0.847036	0.835519	0.836934	0.844192	0.832995	0.840715	0.814218	0.815621
cg02054542		ACAGTTAGGGCAGGCAGGCCCCCTGCGTCATGCAATAATGCCTTCCACAATACCTCATGA[CG]CTGGGGATGGAGGTAGAGACAGCACCTTACTGACCAGGGGTTAGTGTTCTGGTGTTGGGG	0.549972	0.539757	0.552852	0.555129	0.582216	0.323721	0.356814	0.161965	0.311296	0.179961	0.588004	0.542825	0.545547	0.592314	0.300491	0.817967	0.830211	0.851355	0.82397	0.799521	0.832746	0.810373	0.791757	0.818018
cg00979527	AJAP1	GCACCATGACAGGATACTGGATTTGGAGGATCCGTTTCCTCCGCCTTGAAACACAGCTTT[CG]GGGTTGACTGTTGCTCCCAGGAGTCATGAGCATCCGGCATGAGCACGAGCGTGAACCCGC	0.394851	0.45276	0.474461	0.42935	0.431766	0.105476	0.295901	0.198323	0.280748	0.742692	0.438399	0.480544	0.408309	0.389263	0.775236	0.859162	0.863267	0.8716	0.826029	0.856829	0.854372	0.840591	0.829756	0.866955
cg04913291	OPCML	TTATGATTTCCAGATCACAGAGAGGAAACTAAAGCACAGAGAGGTTGGGTTACTTGCCAA[CG]ACAAAAACCCAGGGAAACAACCTGCCTCTGTGATGTCCCACTGGCATTGTGGCCAGCACT	0.440667	0.484005	0.486655	0.500554	0.47792	0.18923	0.285874	0.278429	0.29352	0.248026	0.508279	0.526101	0.488287	0.505677	0.276664	0.79155	0.781675	0.804024	0.794428	0.766441	0.758018	0.784956	0.777606	0.801093
cg02917236	MIR548A2	AATCAGAGTCCTCAGGAAACAGTTTTTCAGGGTGTTGTATTGCATTCAACCCCTGTGGCA[CG]TGATCATCCACAAATAGTATGTACAGAAACTTTAGATTGGATTAACTAGAATACCATATT	0.589434	0.655414	0.626349	0.630243	0.664679	0.269884	0.452226	0.268935	0.402074	0.297396	0.686367	0.661993	0.652372	0.696365	0.43003	0.263803	0.276236	0.251912	0.252629	0.272893	0.292596	0.219345	0.207634	0.168296
cg09256683	CCL14	GTTGGAAGGAAGACAAGGCATTGCACTCACGTGAGGAGGATTCAGTCTTGGTCCCTAGGG[CG]ATGGTGATGAGGAGGAAGAAGGGAATGGCAGCCACGGAGATCTTCATGCTGTGGGAAGCT	0.454641	0.408054	0.426613	0.398745	0.459932	0.112778	0.125169	0.190291	0.192841	0.285796	0.442688	0.449047	0.422846	0.47715	0.263971	0.815586	0.800134	0.812572	0.80472	0.781795	0.790426	0.792021	0.774096	0.79205
cg25023666	DSCAM	GACTTCTTGATTTCAGATGTCTGTGAGAGAAGAAACGTCTGTTGTTTTAAGCCACTCCAT[CG]TGGTCATTTTGCATGGCAGACCTAAGAAACGGATGCCATCTTCAAGATCATTTGAACAGT	0.624122	0.585009	0.579778	0.591656	0.581478	0.258898	0.514493	0.248293	0.201902	0.330259	0.587009	0.579656	0.605543	0.67252	0.614266	0.898081	0.877918	0.811822	0.858069	0.833734	0.856458	0.855657	0.857727	0.88082
cg11906285		AATTGTAGAGCACATCTCTCCCATGCTTTCTTGCTATGTATCTTATATATAAACAGGCAT[CG]TTCCTAAGGTGGTGTATTTCTCCCCTTGCTTTCGAGGACACCCTGCTCTGTCTATGGAGT	0.63533	0.597943	0.610794	0.606789	0.60654	0.171568	0.31651	0.49947	0.337702	0.172683	0.599284	0.615367	0.589153	0.60441	0.261218	0.868629	0.868664	0.865287	0.875852	0.873861	0.868784	0.874875	0.852759	0.893317
cg00141925	A2M	AAAAAGAAGCTCAAAAAATTGTTCTTTCCTTACCAGGTGTTGCCCTGGTTCCTGCCATAT[CG]CTCCCCAAAGGTGCTGTAGGAGCCATCATAGTGTTTGTAGTTCAACTGTCTCTGGTAACC	0.597163	0.571139	0.603286	0.589627	0.567999	0.375202	0.386421	0.234643	0.343054	0.25809	0.615856	0.622593	0.583413	0.641051	0.288524	0.821845	0.776841	0.805944	0.789278	0.808693	0.775378	0.826259	0.819979	0.805503
cg07811262		TTGGAGCTGAGACTTCAGCCTCCCTCTGGTCTTATGGGCCAAAGGAATTTAACATGGGAT[CG]TGGAAAGGGCTCTGGGCCAGGGCTCAGGGGCATGTGGCTCCTGGGGCCCAGGGCTGGCAG	0.536335	0.552539	0.554851	0.520996	0.528979	0.287936	0.292496	0.150744	0.333822	0.359078	0.603944	0.586791	0.574131	0.599941	0.365881	0.858361	0.858148	0.872933	0.85201	0.874897	0.850806	0.867045	0.815681	0.86046
cg19215541		AGGCCCAGGGCCCTTGCGTGAGCTCCACGAAGTCTGCGCCGGGCCTTGGCACTGACCCTG[CG]GGGCCTGCAACCCAAACTCACCGGTTTCTGGGAGCTGGTGAGGGGCTGCGCTGGGGCTGG	0.396519	0.373252	0.443785	0.384146	0.425446	0.137146	0.189102	0.29115	0.198542	0.476003	0.383536	0.446476	0.380568	0.4031	0.495749	0.756103	0.746864	0.760447	0.760446	0.79967	0.772626	0.800966	0.785531	0.826709
cg11852796		TCACTCCATGCCTTTGCCACCTCCAGTGGCTTCTGTCATGCCTAGAACAGAACCCCAATC[CG]GAGAAAACTGACCCACTGTGGTCCCTGGCTGCTTCTTTCCACCATCTCCCTGCCCAGCAC	0.321425	0.351318	0.345077	0.343434	0.366426	0.0938973	0.219842	0.095714	0.101334	0.148253	0.378799	0.384097	0.337836	0.386548	0.09206	0.597654	0.568743	0.600137	0.606408	0.616281	0.590493	0.582988	0.566542	0.580095
cg04112366		TGACAAAAACACCCCTGAACCTATAGAAGCTGGGACCCTGCTCAGTGCTGAATCTTTCCC[CG]ACCCTCCTGCCAAAAGTTGGGCTACATCTGCCCAGGCAAAGGCCAGGGCTACATGCACAT	0.462684	0.43746	0.437619	0.447656	0.455812	0.111985	0.120669	0.296865	0.327263	0.495826	0.476866	0.446314	0.454236	0.434297	0.404382	0.784977	0.774651	0.836778	0.804604	0.816244	0.764273	0.765765	0.728577	0.79226
cg04999435	HRASLS5	CCCTGAATAACGAATCTCAGTTTTTCTTAAGGTCCTCCTCCTCTGAGCTACACTGTGGGT[CG]AAAAGGGCAGGATTATCATAAATGGAAAGAAGCTAGAGACATTTTAGTTAAATAAAAAGA	0.507733	0.508035	0.543941	0.51876	0.53321	0.236806	0.369519	0.239194	0.414043	0.271109	0.584688	0.505143	0.534898	0.575505	0.215287	0.813718	0.824721	0.813528	0.783761	0.82767	0.781447	0.806315	0.782396	0.826919
cg01576260	LOC285401	ATGCATAGGAGGAAAATCTAAGCTACATTCTATGAAAAAGAGCTAATTTTGACCAAATAT[CG]AGCAGCTACGTCATGAGTGGAGTTAGCATCGCTGATGGGTCTCTACACTAGGGATAGTTA	0.509956	0.446395	0.484028	0.512966	0.462498	0.194423	0.280041	0.218992	0.367744	0.378979	0.474247	0.499611	0.524293	0.483001	0.214263	0.881264	0.87264	0.865338	0.860086	0.862984	0.866511	0.864326	0.846865	0.881243
cg24299177		AGCTGTCATTATGTCCATGATGAGGAAATTGAGGCTTAGATATGCTAAGTGACATAGCCA[CG]ATGACACAGATAGCAGTAAGAGAGTTGGGACTGAAATCAGATTTTTTCCTCTCTGCTGTG	0.445354	0.43613	0.480889	0.457388	0.435038	0.249876	0.291751	0.273079	0.186105	0.146549	0.451594	0.463126	0.501489	0.430737	0.173551	0.816832	0.813304	0.822129	0.830501	0.814236	0.805332	0.803563	0.767771	0.828902
cg13638867		CCTTAAAGCACGGACACAATGCAGTTGCAACCTTTGCTAGGGGTTAACAAGGGTGATCTT[CG]CTCCAGTCCCCAGTAAGTTCCTCATTTCTATCAGAGACCTCATCAGCATGGCCTCTATTG	0.620735	0.579427	0.588848	0.601865	0.606086	0.287287	0.314895	0.273102	0.408776	0.27009	0.617134	0.657796	0.662936	0.620123	0.428922	0.847651	0.842599	0.861386	0.857506	0.872416	0.860368	0.857784	0.83045	0.83682
cg26312888		GGTGTGCAGGCACCAAAGCGTGGACAGGCCATGCTTTGCTTAACAGCATGGGGCTGGCCA[CG]GCACCAGGGCCTCTGCCAGCCTCACGAGGCCCCTCCTGGCGTGGCCATAAAAGCCACAGC	0.478704	0.463492	0.458242	0.461259	0.473152	0.212292	0.341496	0.274175	0.226194	0.347179	0.484817	0.496247	0.444009	0.466134	0.460382	0.823067	0.80853	0.798078	0.802119	0.816414	0.802215	0.822731	0.754048	0.811553
cg21551271		CTGGCGACAGCCGGTGTGTGAAAAGCCTGTTTCCTCCCCTAGAAAAAGCACGTTTGGCTC[CG]CTCTCCACTGACACGTTTTTAGCTGAGTGACGATGGAAGCCGCTGGCTTTTAACAGACGG	0.38824	0.365552	0.3535	0.389855	0.302189	0.13821	0.177172	0.134553	0.123683	0.490488	0.33299	0.373996	0.389674	0.342667	0.473625	0.843344	0.830187	0.756465	0.820883	0.8335	0.776132	0.841687	0.796725	0.84089
cg15343224		CAGTGGCACAGTGAGGAGACCTTTGAGGCCTCAGTGACCATCCTTGGACTTCACCTCTCA[CG]GCTTTCAGGCAGAGAGGCCCTCCCATGCCCACAACAGGCTGAGCCCAGCCTTCCTCGGGG	0.470847	0.422834	0.458748	0.457578	0.436404	0.226137	0.311764	0.267682	0.121567	0.368004	0.453109	0.468902	0.455926	0.44594	0.260622	0.800799	0.800464	0.782693	0.78226	0.784493	0.772472	0.812351	0.755876	0.800257
cg05322332	FRAS1	CAGGCTCTACCCTGTGACTTGGTGCATAGGGCGCATGCAACCTCCTGGCACCAGCCCCCA[CG]AGGGTTGGGGATGACAGCATTCATTGGGATGGAGTGGAGGAGCTGGTAGCTGAGAACTCA	0.324572	0.373977	0.3404	0.328035	0.25825	0.118226	0.109428	0.0864036	0.0729013	0.0848195	0.432595	0.34073	0.327076	0.32969	0.076775	0.867963	0.892507	0.881826	0.887557	0.875986	0.850501	0.888443	0.832696	0.874481
cg06878108		GCCTAATGCCTCCAGCCACCAGCAAATCAATAACAATAATAACAAAACCATCACCAGTGA[CG]ACAGGGGGCCCTCATCAGGCACTCCACCCATGAGGCACTCACAGTAACTCGATAAAGATG	0.365592	0.320684	0.334008	0.370361	0.385312	0.139385	0.159755	0.119679	0.0823028	0.0868347	0.367034	0.333047	0.390783	0.425459	0.133832	0.788768	0.755617	0.778891	0.787741	0.762957	0.778059	0.778777	0.728672	0.788859
cg01367992	LY9	TGTTGGTAAAATCGGGAAACTCATCTCCTTGCCAGAAATTACTTTGCATGTGTGCATATT[CG]TGCACTATGAAGGGGGTAACATTCTAGCCCCGGTCTCAAATAGCTCTGGGCTCAAACTAC	0.488167	0.446524	0.469576	0.51277	0.479886	0.185325	0.274204	0.124656	0.168729	0.271963	0.481536	0.491065	0.508882	0.477065	0.145781	0.850085	0.829167	0.879869	0.821095	0.816897	0.809296	0.824749	0.789337	0.822699
cg13385568	B3GAT1	GTGTGCGTGGTAGGTTACAAACAAGCTCAGACACTGTCCGAGGTACTCATCCCTGGAGGA[CG]AGAAAGGCCTTTTTACCCAGTAAGATGGGAACAGTAGTTAAGTGGTTCATCAAAAAAGTC	0.543915	0.53225	0.525207	0.528394	0.561415	0.109949	0.383236	0.341628	0.227288	0.104893	0.557667	0.529211	0.550312	0.576684	0.27954	0.872376	0.864288	0.859372	0.868267	0.86105	0.880288	0.861451	0.80683	0.850436
cg15021031	PPP2R2B	CCAAACATAGAAGTCACTGAGTTGCCATATATTACTATAGAACAAGCATTTTATTTCAAA[CG]ATGGGAACCTCACATAAGTTAGGGGAGGAAAGGCAAAAATGAATTCAGTGGTGTTAATGG	0.518561	0.532527	0.543742	0.524437	0.55959	0.19789	0.2825	0.196539	0.152628	0.357214	0.522138	0.541882	0.533995	0.569643	0.277099	0.859182	0.840538	0.830236	0.852332	0.855355	0.823646	0.832406	0.809214	0.862566
cg23906876	DCDC2	TTGTTAGCAAGAAAATCAAAGTCTGTTCCCTATTTGTCCCATCTTTTTCATATTTTGCCT[CG]TCTCCCTGGATTGTTTGGGTGAGGGTAGCTCATCAAAGAGCTATGACACTTTGGGGCCAG	0.469304	0.429965	0.471768	0.471909	0.433284	0.196559	0.242793	0.206219	0.302214	0.123931	0.47364	0.498055	0.457333	0.457619	0.253895	0.8604	0.842445	0.832564	0.830148	0.8445	0.812133	0.838704	0.787803	0.849001
cg09798801		GGGCTCGGGGCCCAATATCAGGCATGATTTTTTAAACTACACCTATTTTTCCACAAAGTT[CG]ATTCTCTAAGCTTTTGTAAGTTTTTTTGTAAAAAAAAAAAAAAAACAAAAAACTGGTTGA	0.460062	0.443188	0.470277	0.496794	0.407312	0.250176	0.195583	0.21137	0.144427	0.114064	0.479772	0.474928	0.511185	0.443696	0.154813	0.895673	0.84651	0.854591	0.876356	0.873801	0.854539	0.848027	0.84303	0.867445
cg24694665		GGCCTCATTATACCTTAGACTTAAGGAGAGATGAGAAAGAAAGAGGAATCAAGATCACAT[CG]AGATTTTCTTGCTTGAACAACTGGGTAATAGTTGGTGGTGTTTACTCAGATGAGGAGATA	0.526204	0.490625	0.49103	0.526113	0.483014	0.217849	0.287434	0.343405	0.322065	0.316746	0.521605	0.543717	0.550098	0.529448	0.265422	0.852462	0.87719	0.867648	0.855657	0.831489	0.83933	0.837064	0.792358	0.828085
cg15952487	CD1B	CCTCCTTATCACTAAAGTTACCTTTAGACCAAGGCTTCAGGAATATGGCAGTGCCTGAGT[CG]CTATCCCAGCCATGAATCTGCAAATCATCCAACCAGCCTGAGCCTTGAGTTTGTGCCCAG	0.353492	0.341484	0.39036	0.371962	0.338084	0.109459	0.12574	0.0920773	0.0970475	0.0843419	0.44257	0.391478	0.362311	0.356116	0.128499	0.844224	0.833048	0.867517	0.837399	0.836364	0.788116	0.827861	0.764899	0.859384
cg25650360		GCTGATTTTGAGGGCTGAGGAGACTTTCAATGGGTGAAAAGTGGGTGGAGAGTTCCAGAA[CG]GAATTATACATGTGAGTCTGCATGTATATACATGCATGAATGCATGCATAATTAAAAATT	0.422387	0.402087	0.451046	0.374665	0.36213	0.114946	0.148574	0.0841698	0.251027	0.106165	0.463035	0.465914	0.411588	0.470888	0.0992204	0.865901	0.866598	0.855724	0.849082	0.832754	0.81582	0.852943	0.816452	0.845115
cg25264393	GLB1L3	TGGCACAGCAACAGCCAGGCCTACTGTAGAGGAGGTGTCACCTTTTAAAAACAGAATCTA[CG]TTATTCAGCAGCACTGAAAATGCTAGGCTACAAGTGGAATGCAGGTGTCAGGCTGAAAGC	0.453308	0.419097	0.431304	0.424004	0.403572	0.160006	0.198364	0.232271	0.0845124	0.102969	0.46021	0.45839	0.43081	0.433752	0.297554	0.804185	0.795957	0.811383	0.812957	0.775563	0.787825	0.792564	0.73109	0.783235
cg04057858	T-SP1	ACTTCAGGGATGCTGGGGTACCTAGCAACTGCTAGGGGTCGAGCATTTCCCCATGTTTAA[CG]CCCACACCACCACGGTGGGGCATCTGCTCTCAGACAACGTGTGGATGAGGAACTCAAAGC	0.436831	0.43405	0.424149	0.426774	0.430174	0.164246	0.219939	0.215751	0.273458	0.14775	0.436823	0.445728	0.434659	0.417917	0.225363	0.76107	0.757599	0.744657	0.757055	0.756244	0.733082	0.759283	0.703153	0.775057
cg14731422		TGGGCTGCTACCGCTTGAGGTGTGTGGAGCATGGGAGCTGGATAGGCATGTGGCCCTGGA[CG]CTGCCCCAGCCAACAGCCACTCAGGTGGGGGCCTGGTGGGGGGCAGGAAAGAGCCTCCCA	0.473471	0.45136	0.4799	0.446514	0.433558	0.221955	0.288025	0.257493	0.215911	0.20552	0.469117	0.523237	0.441311	0.465043	0.261548	0.807968	0.797208	0.811395	0.799418	0.810875	0.792213	0.808779	0.761744	0.823438
cg17143900	CAMTA1	GAGGCGCTGCGGCAAGGTGCCCACGTCCCTCTGGTGATCTGGAGACACGGTGAACAATGT[CG]ACATTGAATATGTTGCCAGGAGTGCTTAGCGGAAGGTTGATACAGCACCTCGGGTCTGAA	0.409402	0.344368	0.387936	0.372485	0.427961	0.112831	0.199897	0.25319	0.16827	0.373392	0.325742	0.398465	0.361794	0.393682	0.219146	0.82741	0.829476	0.828826	0.8179	0.836435	0.80462	0.820385	0.775374	0.820263
cg13675849	TRPV5	AGTTAGGTGAGCTTTCTGAGCCTCAGTTCCTAACCTGTGAAATTGGGGTAACGGCTATGC[CG]TCTCACGGGAGCATCTGTAAAGCATGTGTCACAAGTACTCAATCACTGCCGATCCTCCTT	0.700801	0.699378	0.697457	0.678637	0.712705	0.319534	0.50214	0.29016	0.523561	0.365342	0.666844	0.699375	0.681991	0.667676	0.706282	0.891263	0.861895	0.897246	0.888463	0.877551	0.892159	0.865255	0.864902	0.872897
cg25345746		CATGACCCTTGTAAAAGTGTTGTTAAAGAGAGAAAAACAAAGGAAAAAGCCCTAAGGAGG[CG]GACTTCATGATTAGGACCACCCAAGGAGAGTCTCTAACAAAAGAAAATTGAGTTCCATAA	0.485305	0.408536	0.434291	0.421741	0.460089	0.157363	0.220984	0.242317	0.168012	0.141017	0.452731	0.496554	0.41625	0.514167	0.15574	0.847399	0.84216	0.813065	0.827076	0.848555	0.814779	0.834711	0.798215	0.831979
cg12876838		AAAGAAAACCCTTTCCATTGTGAGAAAGGGCTGGGCAGTTGCCAAGACTAGAGGGAGTGA[CG]CAAGGAAGGAGCTGAGAAAGTGCTGTCTTTATGCAGAAGCAGGAAAGGATCTTCATAGCT	0.555736	0.53449	0.53385	0.557562	0.504503	0.192799	0.365121	0.281586	0.233347	0.236368	0.537945	0.556982	0.56102	0.545061	0.504794	0.820064	0.842113	0.845674	0.819729	0.836039	0.815592	0.808666	0.789504	0.800283
cg13680362	OR2H1	AAGTGGAGGCTCCAACCAGTCCAGAAGTTCCTTTCTATGGGGAAGCTGTGGCAGCAAGGC[CG]TGAAGAGAGTCTGACTTAATTGCAAGTAAGTCACAAGTTTATTCCCCTACAGCCCATCAA	0.56342	0.555058	0.576908	0.581422	0.61599	0.242046	0.302226	0.198047	0.492456	0.400812	0.526729	0.568476	0.56035	0.598958	0.349681	0.902234	0.848056	0.817813	0.852116	0.877209	0.864945	0.864061	0.844889	0.858327
cg23642392	SLC2A9	AGAGCTGGGAAGTAGCTCTGGGGAACATTGGAGGGTCAGCTTCCTGATCATTTAAAGATT[CG]AATGTCCAAAGAATCCAGAGAAAAAGAACATAATCTCTAGTATCAGAAGCCTGGAGATTA	0.398896	0.373585	0.408163	0.42673	0.374114	0.17748	0.212882	0.0919308	0.23423	0.0922058	0.425336	0.391101	0.417866	0.422227	0.204852	0.78645	0.80251	0.817986	0.77649	0.793275	0.801506	0.783772	0.720269	0.769883
cg22759261		GTGTGGTTTCCATTTCCATTAAAATGTACGTTTTTGCACCTGGCTATGTTAAGGCTCTGC[CG]TGTGGAATGTGATAGGCCCAGCTGAGCATGCTGTTCACCCGTGTCTGATAGCCTGGACAA	0.43555	0.480803	0.49801	0.446069	0.447649	0.137393	0.279512	0.306001	0.119238	0.137016	0.461643	0.482867	0.444354	0.450109	0.248973	0.872374	0.863847	0.866373	0.840847	0.865139	0.837894	0.856252	0.800351	0.848167
cg11676636	ARHGAP22	CTGGCTAGCCCAGTCCTGGACTCTCCTGACCCCCATCTCTTGCTGGTCTGAGTCTGCTCC[CG]CATCCACCCGTCCTGCCCCCAGACCCTGCAGCTTTCTGAGTGTTCTGGCAGGAAAGCCTG	0.499744	0.47606	0.491544	0.524044	0.45611	0.187121	0.287561	0.272724	0.313623	0.284433	0.538234	0.476084	0.510818	0.482082	0.289037	0.779973	0.722132	0.80641	0.793689	0.779652	0.762152	0.852522	0.806317	0.85024
cg25792999		CAAAGCCTGGTCATAAGTGCTCTGAATTATTTCCAGCAAGTAATGCCGAACTGCTCCACC[CG]CCAAGCTGAATGCTCATACACATGGTGTGAATGCGTTACATGAAGAACAGAGTGAGTGAG	0.515589	0.486818	0.498726	0.449029	0.452001	0.128475	0.110967	0.214053	0.0910007	0.286221	0.504844	0.491923	0.421289	0.473224	0.515275	0.866179	0.868718	0.835866	0.864234	0.857741	0.857863	0.849352	0.820761	0.866351
cg02133070	TACR3	TAAGACCAGAACTGGTGATCTCACAGTCAAATCTAGTAAACTTACTAATATTATTTAAAT[CG]TGAAAATAGAAAGTAAGTAATTTTTCCAGTACAAAATGAGTGCTGAACACTTCAAGGAAA	0.56786	0.522951	0.541821	0.578464	0.526852	0.221864	0.350971	0.176747	0.269144	0.172189	0.569013	0.585241	0.573264	0.599611	0.163955	0.841874	0.861228	0.818003	0.862972	0.856262	0.844592	0.83513	0.822995	0.840226
cg07233230	WDR64	GACTCACCCATCTGAGTAGGGAATAAATATAGGATAAATTGTTGGCAGAAAGCTTTCGAT[CG]GATGAATTTTCTCTGAGCGAAAAGCCAAGCTTTCTCTAAGTCATTTTTACCCACATAGTC	0.422571	0.325618	0.361946	0.3777	0.330255	0.165566	0.128573	0.168912	0.126078	0.599865	0.286185	0.340774	0.327478	0.390168	0.221842	0.87833	0.883348	0.854886	0.875432	0.920586	0.857478	0.890555	0.829771	0.897687
cg27331495	DTWD2	GCATTTTCCGCCTTGGGATGGCAGTTTAAGAATTTGCAGGATTTCCACGCGTGCATGCAT[CG]CAGGTGCGGCAGCTGATGCACTTATTATTTAAAGGCCAACAAAGGAGAGGTTATATCCAC	0.378018	0.378373	0.340071	0.371043	0.300702	0.127028	0.131348	0.113798	0.152131	0.607702	0.295634	0.363158	0.355706	0.312874	0.855358	0.804463	0.78446	0.737392	0.753655	0.775458	0.76721	0.746375	0.803114	0.779739
cg26014409	CD1E	CCATAGTTTTATCCAGATAGTGCAAGCTTCTGCTGGTCAATTTCAGCTTGAATGTAAGTT[CG]TTGCTCTAAGCTGATAATTTGCCTGGGAACACCAACTATTTTCCAAAGTGGAAGATAGTA	0.386984	0.399163	0.416167	0.439221	0.370783	0.156762	0.195042	0.134243	0.309672	0.0659728	0.412272	0.451055	0.465531	0.404347	0.0767779	0.850848	0.850124	0.855691	0.838923	0.852236	0.844817	0.845654	0.782835	0.862508
cg01495831	OR5H15	AACATCTTGGCCATTTACAGGACATATGTCCACTTTGTTAGCTCTTTAATATAACCTGCT[CG]AGTTTATTTTCTTGCCATCTTTTTTGTTTCTTCATTACTCTCCAATGGATAGATCATTTT	0.402106	0.334318	0.415842	0.395234	0.340132	0.0890273	0.210467	0.203758	0.115943	0.127871	0.390522	0.397671	0.433467	0.335367	0.296762	0.855868	0.860216	0.84224	0.839975	0.857328	0.849383	0.844538	0.813592	0.876652
cg05878103		TAAGTTTTCAGTTCTGAGAAGGGACCACCCATCCTTCTTTTTAGTCCCCAACTCCCTGGC[CG]AGTTCACTTGGTGCTAGTACATCAGAGTTCTAAGCATGCCTCATAGCAGAAAGCTGCCCT	0.469596	0.460775	0.50006	0.458306	0.456074	0.270756	0.193586	0.232072	0.336789	0.175757	0.496764	0.518774	0.475271	0.518621	0.149161	0.843184	0.821361	0.813823	0.83809	0.860426	0.8501	0.852805	0.790594	0.866843
cg14660733		TTTGTCAGACTCATTAGATACCCTACAAGTTTCATCTTCTTGAAGAAGCCTCCACCAAGA[CG]TTCTGAGACGTTTCCTATGAAGGAAAGATCTTTTGACGCCATACAGGTGTTGTCTTGGGA	0.425372	0.410525	0.444776	0.488191	0.435185	0.251333	0.240829	0.160744	0.285936	0.237673	0.450469	0.444613	0.517008	0.458696	0.244077	0.825237	0.779222	0.765645	0.775263	0.802449	0.741097	0.766673	0.765409	0.786233
cg15946856		TTGAGATCTTCCCAAGCCAGTCACCCAGTCGATAATCAGCTCAAGATCATCCCTATACCC[CG]AGTAGAATTAGTTGTCAATATTTAGGGCACAAAATTCATTTTGGTGAGATGCCCTAGGCC	0.533184	0.50704	0.519559	0.476991	0.547343	0.167733	0.3263	0.138499	0.325313	0.0997897	0.494366	0.547366	0.491513	0.546635	0.123192	0.856788	0.852789	0.86973	0.836621	0.837468	0.838234	0.819383	0.830722	0.850122
cg18816826		TGGCTTTGCCTTGAGGTCCTATTTCTGGAGAAATCTTCAGGTATGAATCTTGGCCTGCCT[CG]AGGACTTAGCTGTGTTCCTTGACTCAGGTTTGAGTGGCACCTTCTCGTGTTCCATTTGTT	0.452364	0.396899	0.437412	0.446668	0.464662	0.125503	0.200253	0.318437	0.206452	0.131174	0.426473	0.442532	0.471829	0.433891	0.135102	0.82883	0.837448	0.851755	0.832007	0.826486	0.830976	0.81281	0.769926	0.83016
cg00245890		GAGCCAGGGAATCTTGAGCTGACTGTTGTGGTCTCAGCCACACAGTACCACCTCCCTTTG[CG]GCCTGTTACCAGCCTTGGTACCTTCAAGGCCAACTGTTGGCCAAACTCTCTTTGGTTGGC	0.47969	0.453362	0.41198	0.437155	0.433484	0.267872	0.300827	0.110689	0.151695	0.108934	0.427938	0.448693	0.439112	0.428292	0.315926	0.840603	0.840774	0.863308	0.8451	0.850941	0.8587	0.777048	0.739131	0.776306
cg04923174	OR10X1	CCACATACAATGTTGGTCATAAGCAGTGGATATCTTAGAGGGTTACAGATGGCCAGGAAG[CG]GTCATATCCCATCAAAGTGAGAATGATACAGTTTGTGCCACCAAGTCCCAAGAAGAAGCA	0.535746	0.4735	0.488623	0.464466	0.456428	0.189372	0.325278	0.177239	0.148225	0.102085	0.517647	0.49838	0.522346	0.498055	0.120686	0.881335	0.879879	0.878474	0.883215	0.883287	0.861752	0.885548	0.839328	0.870946
cg15761405	FCRL2	CACTGCACTCACCCAGGAATCTTATTTTCTAGCAGCAGCTGTCATCTCCCTCATTGTCCA[CG]ATTAAACAGAGGAATATTAGCAAAGGGTCTCAATGCATCTGCTGAACCCAAATCTTATAG	0.492422	0.470726	0.464453	0.489397	0.468303	0.201629	0.262841	0.171116	0.181918	0.181733	0.526679	0.537554	0.514005	0.519955	0.289877	0.871909	0.832831	0.849673	0.848476	0.869573	0.828	0.863641	0.783138	0.851983
cg08249698	A2BP1	TATCACATTGTGCGGTGGGGTAATCACTCTGTTATTCTGCCCCATGCATGGTAATCAATT[CG]TTTGCCATTTATCAAAAAAAAAAAAAAAAAAAAGTCAAGCCCTCATGAAGTCAATATTCT	0.384144	0.40043	0.392257	0.363401	0.35912	0.156349	0.238604	0.108585	0.198394	0.182363	0.426147	0.426739	0.39812	0.439071	0.216517	0.778584	0.799268	0.728358	0.828188	0.850831	0.808352	0.822715	0.730199	0.773055
cg20541752		CAATTTAACCCTGGTCAATGCAGCAAACTTTGCATCTCCTTTTTCTTGAAGTGCTTTTCT[CG]CTTTTCATATCTTGCAAATTGTGAAAAAAGAAATGAAACTGAAAAAAAAAAAAATAGAAA	0.558177	0.535422	0.579265	0.576694	0.600448	0.269007	0.257101	0.351143	0.278368	0.117871	0.553179	0.608359	0.596702	0.573861	0.216199	0.875253	0.875409	0.871934	0.889041	0.876517	0.887382	0.878341	0.846008	0.878104
cg14503689		GCCTGGGCAACATGGCAAGACCCACAACAAAAACACAAAAACTAGTTGGGCTTGGTGGCA[CG]TACCTGTAGTCCCAGCTACTTGGGAGGCTGAAGAGGGAGGATCACTTGAGCCTAGGAGTT	0.554671	0.554311	0.572145	0.574162	0.543893	0.403736	0.287136	0.249381	0.455018	0.467771	0.572677	0.570173	0.607383	0.554726	0.24295	0.732738	0.75558	0.769807	0.744826	0.736139	0.743265	0.73785	0.727313	0.747849
cg11844087	PTPRN2	AGCGCTCTTTCTGTGTGGATGGTCTGGCCCTGTGTTGACAAACACCTAAATAATCCAGCA[CG]ATTCCCTTCTAGATGTATCTCTCTACGGTGACTGAGTGTGCTCAATGCTTACAACTAGGC	0.562399	0.538585	0.561405	0.557511	0.593114	0.269447	0.369183	0.21071	0.384194	0.202872	0.559636	0.555145	0.556619	0.57451	0.455129	0.831915	0.837299	0.802643	0.821142	0.817661	0.820582	0.833659	0.797681	0.820171
cg03607415	GPR98	GTGAGACCTCTGTAGAGACTTAAAATTCCACTACAATGATTCAGCCAAGGACATAGAGAA[CG]AAGCCATCTTATGGCAGTCCAGTCAAATAAGAACCTTTCTAACCTCTTCTCAGTTCTGAT	0.572087	0.550014	0.569124	0.548615	0.524252	0.393958	0.271842	0.28322	0.415906	0.302843	0.57428	0.593276	0.579472	0.575808	0.26572	0.881505	0.854963	0.854347	0.842279	0.855723	0.854675	0.825759	0.792633	0.833099
cg12423733	MAS1L	TGTGCTCCCTGGGAAGAAGGTTCTCCACATGCTGAGTAGAGTGTGGTTGCTCCATTGGGT[CG]ATGCCAGCTGCCTTTTTGTTCCTCCCCACCTCTGGCTTATCTGCTAACGCCCGTTGGAGA	0.509274	0.500939	0.477601	0.51534	0.457671	0.275386	0.258596	0.106075	0.340046	0.261587	0.555627	0.498157	0.489408	0.51789	0.273021	0.860382	0.87136	0.875463	0.848116	0.863764	0.851016	0.868055	0.814406	0.882244
cg15097640	SH2D4B	CCACCCAGTTCGAGCTTCCCCATCCACTTTGTTTACCTACTCAAGCCCAGCAATGGCAGA[CG]CCTGAGGGAGGCATCTTAACCCCATTTCACAGATTAGGAAACCAGGGCTAAGTTTTCATG	0.441216	0.384725	0.424438	0.453864	0.432625	0.162309	0.12531	0.139046	0.335354	0.0828351	0.447064	0.469117	0.461173	0.379489	0.0766094	0.835607	0.849597	0.832759	0.822936	0.814953	0.813392	0.834763	0.771936	0.841059
cg25575532		GCCTGATGACTTCAGATTCCTCCCTGTAACAGCACTCTAATGTCACCAATAATTGATTCT[CG]TTGGCACTCTTGCTAAAACTTATTTGTCATCCTGGCCAATTTAGAAGCAAGGAGAATTTC	0.535268	0.516576	0.523604	0.550313	0.502503	0.210067	0.217829	0.199809	0.291478	0.21732	0.529683	0.550377	0.558536	0.545784	0.215803	0.843233	0.833839	0.860545	0.846737	0.842308	0.852899	0.85133	0.794572	0.84928
cg08765597		GGATAGTTAGTATTGCCTCGTGGGTAACCATTGTTACCCAATGGATACTCACTACTGCCT[CG]TGGGTAACCACTGTTACCTGGTGTATAATAAGTGTTGCCTCTTGGGTAACCACTGTTACC	0.585574	0.536459	0.565391	0.582608	0.535131	0.211246	0.342283	0.266123	0.391147	0.311449	0.570279	0.623474	0.61839	0.59897	0.273439	0.829443	0.768219	0.840611	0.833785	0.839385	0.841325	0.832019	0.821363	0.819057
cg05307477	KCNK18	TTCCAGGCAGCTCCAGGGCCGGCCCAGCGGATCAATAGCAATCTGGGGTGCTAGGGAGGG[CG]CCATCTGAGTAGTTCGGAAGAACTGAACATGATGAGTTGCCGGCTGCTTCCTGAGTCCTT	0.474623	0.471676	0.446515	0.477736	0.474786	0.245967	0.408166	0.182472	0.214085	0.164813	0.484366	0.473504	0.488881	0.484718	0.11684	0.759899	0.751759	0.7544	0.762695	0.761601	0.740834	0.765608	0.713608	0.776173
cg24525988		GCCTCTCACCTGCCCTTTATCATGCTCAAAGATGACTATATCCCCTCATGCCCTAAGCTA[CG]TTACCAAAGCCCCTCTTTTACTATTTCAAGGGGTGTTAAGGAGTCATCTAACCTAGATAT	0.455294	0.472085	0.449592	0.46184	0.428368	0.237855	0.302395	0.185647	0.179102	0.161747	0.469495	0.472675	0.486306	0.5124	0.172815	0.748994	0.721639	0.739381	0.713603	0.707861	0.712335	0.706899	0.680988	0.668373
cg24520479		CTCCTGCAACCACAGCAGAGAGAAGGGATGCCATTCGAGGTGCTCAGTAACCTCACCAAG[CG]GCCCTAATGCTTCCACTCCGAGTTTCTGAGGAATCTGAAGGCACTTCACCTTGAGGCTTG	0.521641	0.524805	0.534986	0.506479	0.509729	0.184299	0.298063	0.283448	0.408623	0.252422	0.561629	0.531819	0.508941	0.543435	0.268208	0.865372	0.863135	0.882711	0.868083	0.850925	0.855949	0.874194	0.800896	0.874136
cg18703951	CNR1	GGTGATCCACCTGCCTCGGCCTCCCAAAGTGCTGGGATTACAGGTGTGAGCCACTGTGCC[CG]GCCAAGACTGAGCTTTTTCACAGCAGGGATATGGAGGAGGCCTCCTGATAGTCCCCTTCA	0.539801	0.56744	0.58489	0.5428	0.587244	0.423001	0.351082	0.235387	0.324286	0.258902	0.601585	0.5952	0.544682	0.619366	0.435603	0.829815	0.842403	0.831841	0.824682	0.823799	0.821639	0.822012	0.808604	0.834871
cg14514991	OR6N1	TCTGTTTCTTGACAGTATTGATTTATCCAGCCTGTTCACACACTTCCTTGACTTGATTCT[CG]GGGTACTATACTTTTGGTTACTTTCTATCTTATTAGTCATTCCTTCTCATTCTCCAACTT	0.469973	0.410828	0.470854	0.47059	0.448169	0.136279	0.190083	0.161718	0.186917	0.191129	0.444208	0.473069	0.494213	0.436923	0.195426	0.848719	0.865072	0.890307	0.8421	0.869375	0.852842	0.826732	0.785707	0.856436
cg17266805		CCCTGGCTCCCAATCTGTGATGGATCCGAGGATGGCACTGCCTCTCCAACAGCCCCAGCC[CG]CAGCACTGACTTCATCAGGTAATCAAAATTATTTTCTTACCCCCCAGCTAAGCAGCTTGA	0.543509	0.540058	0.54258	0.550114	0.490201	0.351521	0.333684	0.328421	0.183285	0.194066	0.514973	0.549781	0.554244	0.503451	0.400777	0.825036	0.805858	0.821502	0.81839	0.818007	0.812432	0.81546	0.797783	0.830513
cg15952370	OR8D2	ACTGACCTTTCTCTTTCAAAGCTGTGAGATCTGAACTGGAGATTTCTTATTCCCTGACTT[CG]TTTCCCCTAAAGTTTAAGCAAAGGATTCAGGGTGTGTTGCTTTCAGCTGAAACACTGTAT	0.445974	0.380836	0.40323	0.40003	0.341644	0.112994	0.203202	0.093206	0.114914	0.139433	0.398854	0.404779	0.385977	0.371075	0.154555	0.865209	0.847387	0.832335	0.820558	0.851719	0.847857	0.875667	0.808678	0.851277
cg21983192	DSG1	TGGCCTTACGATGGCAATTGGCATCATTCTCCTTGCTCTGTTTTGCTTTTCCATATAGCT[CG]AGCAAAATTCAAAAAGAACTAAATATGCAATATATGTTCATATCTATGGGAAAAATCTAA	0.605036	0.608691	0.612685	0.573504	0.63299	0.325439	0.431348	0.40098	0.318662	0.162014	0.64545	0.624954	0.591941	0.619173	0.393423	0.865867	0.833316	0.888152	0.851951	0.854892	0.856226	0.862236	0.844899	0.877142
cg17431952	KCNN2	GGTAGAGATGCTTCCAAAGGCCATTCTTTTCTTTCATTAGTACCCAGATCTAAAATACCT[CG]CTTTCATTGTCTGCATATGGCACAAAATATCAAAATAACATCACACCCTCTGCCTTTACT	0.488209	0.511946	0.562499	0.523818	0.498854	0.21506	0.296801	0.19845	0.247737	0.206514	0.543868	0.522744	0.58889	0.530216	0.239626	0.860583	0.891692	0.883651	0.869345	0.88749	0.885467	0.87226	0.835617	0.887176
cg20806725		CTGGCTGACGGATTAACAGGACATTTCAATGATCGTTGCCTCGTAGGAGCAAATGTGGTC[CG]GTGCGATGCGAGGAAACTACGTCCTAATTTCTCTATCAGGGGCTTGCACAAGGCTGTTTT	0.343571	0.310302	0.395204	0.24688	0.354787	0.132781	0.0922476	0.165693	0.0924184	0.186005	0.27907	0.442865	0.209502	0.357733	0.168207	0.894509	0.877849	0.879246	0.901263	0.879667	0.890841	0.874362	0.886559	0.892504
cg08333835	CSMD3	AGTTTACAAAGTCTTCTACCTCATTCCTGCTATTCAGTACCAGAATACTCATTTTAACAA[CG]CTTTTTCTCAGTAATATTTAATTCATTGTAGAAATTTAACCAAACTAGTCCTGACATAAT	0.532817	0.502654	0.572146	0.568936	0.519667	0.190956	0.24448	0.298506	0.386476	0.14773	0.513853	0.558304	0.615058	0.495952	0.271215	0.877795	0.862964	0.851004	0.878455	0.859117	0.85439	0.845563	0.854776	0.85151
cg08800461		ACCTCGTGAAGCTCCAAACATGGTTCCTGGAGGAGGTTGGGGGAAAGGAGGTCCTCTTCT[CG]TGAACAGGCCCCTTGTATCCACTGGAAACAATGGACCACTGATTGCAGCAAGAGGTGGAG	0.53024	0.523987	0.494993	0.486782	0.451195	0.377273	0.23107	0.160526	0.210203	0.10305	0.575731	0.473746	0.514728	0.551377	0.129633	0.831692	0.825635	0.786019	0.811367	0.819826	0.823552	0.814331	0.833141	0.835632
cg03705366		TATTAGGGGACTGGGATTTACAAATATTCCCAGAAAGAGAGAGAATAACATAAAGTTAGA[CG]AAGAGTAGTAGATTTTCTGAGCCTGTTTGGCAAGAGGTAGATAAGAATAAGGCAAACATA	0.418276	0.324794	0.375896	0.348143	0.380911	0.0874253	0.0961208	0.100867	0.209814	0.151245	0.3232	0.402511	0.350424	0.351207	0.169433	0.775219	0.762454	0.785051	0.764277	0.753424	0.731423	0.785554	0.742012	0.796698
cg26250585	MS4A6A	AGCCAACTAATATTTGTGAGAGTTCAGGAGTCATGGAGCCTTATGTGTGAATTGCCACTT[CG]AGACATACAAGTTTCCTGTTGTTAGGCAAGTCTGTTCTTGAAGCTTCAGTTTTCTAATCT	0.525338	0.455324	0.502109	0.529257	0.509755	0.179816	0.321891	0.25248	0.345133	0.196715	0.530261	0.519421	0.543962	0.467995	0.270634	0.867258	0.885176	0.768867	0.861942	0.851417	0.841852	0.846728	0.834832	0.886247
cg05357287	TBX10	GTTCCTTGGTTGAGAGTGCTCGCTGGCCTTTTGACTCTTGCTGAATGGCACAGAGTGGGT[CG]TCTGGCTGGAGCCCCCCATACCTCCTCCAGAATCCTGTCTTGGGGATGCTGGGTTGGCAG	0.363598	0.335511	0.299345	0.292896	0.284883	0.0982057	0.113704	0.0981989	0.096376	0.199836	0.308342	0.281879	0.281775	0.305506	0.371101	0.801539	0.802538	0.833204	0.798888	0.788384	0.798129	0.791698	0.714879	0.793035
cg15471388		CTTTATATTGTGATAAATACATCAATGAGATCTCCAGAAATCCATCTGTCTTCATTTTCT[CG]ATATGCAGAAACAAACAACCCCTCAAATACAACTTAAATGTTACATTTTAAATCTGAATG	0.368754	0.335166	0.396512	0.307604	0.27422	0.0608078	0.133031	0.093787	0.129372	0.066046	0.400922	0.412998	0.283306	0.348823	0.0692181	0.764863	0.812267	0.66799	0.855668	0.856296	0.868571	0.829554	0.806307	0.841022
cg12913512	CDH10	TCGTAGGGGGGTGCGGTGGGGTCAAGATCATGCTCTTTTAGCCTTTCATTAATGAAATCC[CG]GACGTCCGTGTTATCTGGAGCTGTAGGAGTCCTCCGAGGAATAAATAACGTTTCTGGAAT	0.653611	0.666524	0.692558	0.675	0.702613	0.306329	0.339506	0.337567	0.473781	0.664269	0.661211	0.715175	0.714963	0.70485	0.771059	0.889381	0.895894	0.876398	0.898715	0.89005	0.884425	0.88688	0.895176	0.903843
cg05852824		CACCTCTCACAAGGATTGTTCCTTCTTTGCTTCTGGCCCGTGGGGAGGCCACTGGTGCCT[CG]TTTAGCCCATCAGTGTCTTCATCTTACAAAACACTTGTCCTGGGCAAATTGGGATTTGTC	0.467974	0.4477	0.500766	0.486576	0.465164	0.281238	0.265528	0.191794	0.341301	0.195103	0.444786	0.499629	0.476482	0.472466	0.251088	0.830742	0.849128	0.851633	0.837969	0.848855	0.853188	0.823195	0.767931	0.841014
cg10310168		GGTCTAGAAGAGCAAGCAGGTGAGTGATGGGAAAAATAGGTATGTGAATCTTTGCAGTCT[CG]AAGAAATTATTTCATAAAAGAAAAGGTGATCAACTGCATGAAAATTAAAGAAGCCCACCC	0.469699	0.422151	0.499026	0.452844	0.433005	0.248546	0.211962	0.158093	0.256888	0.16126	0.456076	0.49471	0.447219	0.471973	0.194622	0.818492	0.814455	0.8152	0.806776	0.84013	0.827832	0.854447	0.795575	0.850422
cg01943155	LOC255411	TGGTAATTCTTAGGACATTACCATGGTTACCAGGCACAGAGTCCAGTGCCCCAACCTGGA[CG]TTCCAGAAGAGGCCAGGGAGGATCTGAGATGGCCTTCTTCAACTTGTATCTATTGGGATA	0.413048	0.413458	0.409903	0.415439	0.410468	0.098234	0.141993	0.129312	0.132971	0.283254	0.421276	0.413655	0.454926	0.387532	0.489051	0.769736	0.738491	0.779018	0.773774	0.741649	0.738673	0.758424	0.675915	0.745513
cg08152065		ATTTGAGTGCATCCACGTTAACTTTGTCTTGTATTCTGGAAATAAGGAATGGCCCTACAG[CG]AGGAGGAGCCACCTCTTCAAGGTCCAACAGAGATATACAAATGGCATAGTAAAGAAATGA	0.541397	0.440637	0.494722	0.503672	0.49006	0.245688	0.241799	0.210358	0.228524	0.140698	0.48787	0.508911	0.523845	0.500192	0.293545	0.868232	0.876246	0.866728	0.880261	0.881002	0.874089	0.874944	0.846929	0.870013
cg16639860	KCNIP4	CAAACAGACTAATTCTGGAAGAAGCCAGACAAGCTTGTCAAACATTAACCCAGGAATAGA[CG]GAGCAGTATGTGTGACAGCAGATACCTGGAGATGACTCAAGAAAAATCAAAAGTGGCTGG	0.550504	0.530035	0.537179	0.504057	0.502491	0.308719	0.408231	0.277744	0.190912	0.423168	0.518735	0.556223	0.495876	0.537301	0.481448	0.862888	0.861112	0.863499	0.854357	0.861588	0.867697	0.86472	0.803045	0.858219
cg12280471	NLRP3	TTCTCCTGAGCAGCCTCATCAGAAAGAAGCTGCTTCCCGAGGCCTCTCTGCTCATCACCA[CG]AGACCTGTGGCCCTGGAGAAACTGCAGCACTTGCTGGACCATCCTCGGCATGTGGAGATC	0.42059	0.394665	0.42838	0.407251	0.400034	0.214547	0.243427	0.187024	0.173582	0.0791599	0.43271	0.451163	0.42232	0.405673	0.0949998	0.806836	0.83121	0.841376	0.816857	0.824766	0.814405	0.813162	0.723103	0.803301
cg04700930		GTTCCAGGGCCATTAGGAAGAATCTTAACCCAAAACATGGGCTTTTGTTCAACTACAACT[CG]GTTTATTTCAGATTCATCCATTTTGAGTTGCGTGGCTTTGGCCAGTGTTGAACTCTGAGC	0.541068	0.474714	0.542074	0.493445	0.485517	0.121424	0.249053	0.332056	0.34989	0.229302	0.525374	0.535216	0.491409	0.501998	0.240515	0.805933	0.830373	0.848309	0.839247	0.827011	0.814935	0.826654	0.824604	0.821345
cg15583072	SLCO1A2	TTCAAACTTCTGCTGTGTATGACACACCATTAACTGCACAAGGACACTGTGTATTTGCTA[CG]TTAATATTTACTGATGAGTTAATGTAATAATGACCCATCCGCTTCTGCTGCCTGTGAGGT	0.664887	0.672516	0.640094	0.649707	0.659927	0.409565	0.485615	0.539661	0.35094	0.67881	0.643999	0.662968	0.619886	0.713948	0.567418	0.854792	0.793481	0.787663	0.798297	0.819278	0.793384	0.842465	0.822039	0.820442
cg17725851		GTGAGCCACTGCGCCCGGCCCCACCTCTTTCTTAATGAAGCTTTCCTAGGCAGGCTTTTT[CG]TGTGAGCATCTCTGGATCTATTTGCTACCCACCCCATTCTTCATTGCCTGGGAGTCTCCT	0.555793	0.4705	0.52694	0.508827	0.50695	0.1986	0.380402	0.119488	0.176727	0.334575	0.451234	0.525443	0.549494	0.453305	0.31902	0.871755	0.842028	0.877388	0.851045	0.823861	0.825183	0.827585	0.817893	0.826123
cg24874998		TCAAACCTTGCCACGAAGGGTCAAAATAATCTCAGCCTCTAAGTAAACCTGAAATGCAGT[CG]AGGCCATAAGGACTGCAACATATAGTTGAATTCTAGGGCTGTACTAGGCCCATAGACAAT	0.447305	0.417153	0.434144	0.433462	0.359711	0.148232	0.27588	0.223133	0.125015	0.120101	0.416704	0.445374	0.459787	0.377693	0.16574	0.846292	0.845197	0.853199	0.837086	0.838347	0.828307	0.816139	0.76927	0.81312
cg24240626	REG3A	TCACATCCATCATCTTCTACAGTTCTGAATGAGTTGTGAATCTGTGTACTCTCCCATCCC[CG]AGCCCTCCCAGGACACCCTTGCTGAGTCTCAGAGTTCCTGTGCTCCCTGAGGAAGGGACC	0.481015	0.435287	0.485148	0.470563	0.485735	0.151345	0.248729	0.194928	0.248704	0.180599	0.483175	0.488996	0.463748	0.488101	0.132208	0.837346	0.845628	0.836751	0.83426	0.856166	0.817926	0.825411	0.778049	0.859327
cg03449150	SPRR2F	TTGACATAGGCACACAGAAAACGACTGTTTGGGAAGAATTGCATGCTCTCACACCTGCTA[CG]ACATAAACCTTTGAAAAGGACACCAGAAAAGCAGAGAAAAAAAGAAAAATACTTTGTTAT	0.427163	0.352558	0.358272	0.346708	0.37898	0.164706	0.175935	0.15434	0.190489	0.153384	0.408171	0.386039	0.341958	0.382275	0.199181	0.829564	0.831553	0.840004	0.828828	0.865435	0.862812	0.706218	0.699099	0.69053
cg04028695		GGCATAGCTGCCTCCCTATTGTCAAGGATTTTGAGCAGATCAGATTTGAGGACCTTTTTT[CG]ATAGGTCTATATTTTTCTTACAGCCACTCCCCATTTTAAGCGCATCGTGAGTAGGCTTTT	0.346115	0.255248	0.289846	0.375323	0.363049	0.0916796	0.118475	0.108102	0.113756	0.0767542	0.23404	0.295739	0.308458	0.254109	0.0922514	0.888651	0.846811	0.869134	0.838171	0.85619	0.848183	0.86348	0.816485	0.863192
cg25220320		GAAGCGGGTGAGGGAACGATGGGGACAAAACAAAACTTTTGTTCCCCGTACGGATGTGCT[CG]AGAACACTTGGCTTGGGTTCCAAAGCCTGGTCATAAGTGCTCTGAATTATTTCCAGCAAG	0.441541	0.342936	0.343312	0.354628	0.332323	0.141017	0.120105	0.192628	0.130459	0.445109	0.36104	0.379904	0.357978	0.374795	0.400529	0.888537	0.890979	0.89637	0.869668	0.858313	0.875859	0.860932	0.816718	0.890937
cg16343924	OR2H1	ACTCTCCTGTGGAGATACCTCCTACAATGAAATCCAGTTGGCTGTGTCCAGTGTCATCTT[CG]TGGTTGTGCCTCTCAGCCTCATCCTTGCCTCTTATGGAGCCACTGCCCAGGCAGTGCTGA	0.375805	0.325737	0.329291	0.348406	0.308454	0.104694	0.168504	0.136439	0.128421	0.186335	0.339581	0.325704	0.361413	0.350934	0.189446	0.749837	0.712073	0.735283	0.719195	0.757293	0.699633	0.723262	0.657611	0.72931
cg02527056		CAAATCCTATAAAATGGCCCCAGCCCTATTTCCCTTAGCTGACTATTTTTGGACTCAGCT[CG]CCTGCACCCAGGTAATTAGAAAGCTTTATTGCTCACACAAAGCCTGTTTGGTGGTCTCTT	0.459333	0.414923	0.443085	0.423924	0.420812	0.144819	0.304395	0.160107	0.148772	0.287047	0.437581	0.430296	0.430523	0.448981	0.158709	0.837121	0.839588	0.830482	0.844712	0.81635	0.824272	0.843402	0.755886	0.842684
cg25271525		TTTCACTTTTCCAGTAGCCACCATTTGGTTAACAGACATGAAAACAAACCTTCTGACACT[CG]CCCCACTGGCTGTCTGTCTTCTTCTAGCTGGGAACTCTGATAATGGGGTTTCCCTCTCCA	0.345566	0.341867	0.374754	0.4028	0.400253	0.148269	0.146615	0.148439	0.176355	0.153308	0.377976	0.393974	0.428422	0.355578	0.196901	0.76085	0.780323	0.746898	0.768167	0.775826	0.738654	0.746136	0.709075	0.783537
cg12404294		AACACAACCACTTCTAACCTTGCTATAAATGGCATACAGTCTAATTCTTGCTAAAAAACC[CG]TCCACAGAGGGACCAAATCACTGCAGATTCGCCAAGGGCTGAAGCATCCTTTGGCTATTC	0.433393	0.367982	0.407679	0.432989	0.391784	0.165659	0.181256	0.138255	0.20591	0.0912872	0.41546	0.442754	0.445869	0.387565	0.148241	0.814321	0.807672	0.80764	0.799505	0.810318	0.787014	0.799382	0.728592	0.772682
cg08236285	CSMD1	CTTCTCTTTCACAAACAATGGAAGCAACAAGCCATTCAATTCTGAGACCCTCATGGGGCA[CG]TACTTCAGGATGTCTGTTGAATATGATACACCCGCGTTTTGTATTTTAGCAACATTTACT	0.585027	0.53042	0.553056	0.56973	0.565173	0.29236	0.329672	0.283896	0.462932	0.234763	0.5448	0.591616	0.577461	0.558047	0.286526	0.69052	0.717186	0.60145	0.824232	0.795489	0.819627	0.831727	0.794154	0.839291
cg08580057	SLC35F1	CCATTTAACAAAGAATTACTGAGTCAGGTTAGAGGCACAATCTAGCTGTTAGGGATACTT[CG]GGAAACAAAGCAGAAAAGACCTCCACTCTCATGGAGACTACATTCTACAAGAAAGGCAGG	0.607933	0.579748	0.604163	0.637346	0.608765	0.276184	0.363535	0.362986	0.514749	0.343321	0.610913	0.639091	0.640869	0.582626	0.436934	0.850467	0.87491	0.877983	0.855161	0.866776	0.849819	0.859945	0.826304	0.840396
cg19083474		GAACAAAGCACTAGTAATATACTCAATGTCCAGAGTAGACAATTTATGATCCATTCTCAC[CG]TGGGGGTTTGGCAGCCCTTTAAAAGAATGAGGCAGCTTTGGATGTAGTGATGTAGATAGA	0.436273	0.414434	0.473293	0.491398	0.503434	0.235495	0.187718	0.143591	0.188894	0.164964	0.425532	0.476789	0.456194	0.489252	0.382929	0.840086	0.866892	0.830633	0.862716	0.843139	0.849394	0.841626	0.817244	0.850294
cg25845889		TTTTGACTCAAACTCTATAGACTTATTTGTAGCAAGTGCTTATGATATAATTCAGCTGAA[CG]AGAGGGCAGCTTTAAGACATTTTAGAATTGTTTCTTACCATTGTCTTTTACTTCCTGGGC	0.473212	0.482698	0.446937	0.453121	0.515228	0.15946	0.359324	0.299393	0.149853	0.558964	0.509975	0.465885	0.465977	0.527576	0.381045	0.837967	0.806688	0.820974	0.810839	0.837387	0.813202	0.795006	0.798475	0.854966
cg13655242	KCNIP4	GGGGTCACATGGTTAGAAAACCCAGAATTCAATCATTGCTTTGTCTGGCTTCCAAATTCA[CG]CTTTTCCCTTTATTTCTATCAGCAGATTTCAGCAAATATTTGCCAATTGATCTCTTAGTT	0.514888	0.446808	0.47654	0.474967	0.401732	0.216663	0.269018	0.166172	0.349803	0.212323	0.479256	0.473108	0.486474	0.44421	0.218895	0.894565	0.874221	0.828372	0.902014	0.870269	0.857625	0.873171	0.85048	0.872303
cg06046580	MIR1471	TCCACGAAAAAGGGCGGTTCATAGAGGAAATTCCAACCAAGGCTCCTTGGGTCTGAATCC[CG]TTCTCATTCTTACCAGCTGTGTGATCTAGAGTCTATGCCTTGGTTTCACTCATTTGCAAA	0.417049	0.408508	0.384756	0.447858	0.400252	0.292696	0.180239	0.103636	0.117867	0.13964	0.406427	0.413602	0.450941	0.411155	0.369288	0.692852	0.686319	0.714108	0.685151	0.68094	0.666842	0.690977	0.653018	0.682431
cg26974383	REG1A	CTGGCCTGAGAAGCCAACTCAGACTCAGCCAACAGGTAAGTGGGCATTACAGGAGAAGGG[CG]TCTCTAACATGCACTGTAGATCTAAAATCTTCGGGAAGATACAGCATGAGTTTCTGTCCA	0.577942	0.575196	0.56381	0.544819	0.525552	0.10471	0.213635	0.341327	0.121903	0.178425	0.613921	0.595532	0.541305	0.574629	0.351304	0.84063	0.829599	0.836608	0.84818	0.843676	0.818187	0.84322	0.799077	0.839799
cg06481517		ATGAGAAATGCCATGTTGGCTGGGACAATGGATACACCTGAGAGAGGCTGTGTGCACACA[CG]ACCCAGGCTGGAGGGCTCTAGTACCTTGACACTGTGTATTGCCTCTTGGATTGCTAACAC	0.473495	0.468811	0.518027	0.479155	0.47733	0.140762	0.365658	0.13849	0.260195	0.351684	0.466365	0.539631	0.453093	0.474839	0.429357	0.857919	0.857258	0.848555	0.831126	0.832047	0.832028	0.848283	0.774607	0.849708
cg26874282		ACTCAACAAGCAGATTTTATGGAGACCCCAGTAAAACCCCAAGGATGGCAATAAATAAAT[CG]CCAGCCGGTTCTCCCATACAGCTGCCTCTTCCACAAGACCTCAAGCCTCTGAAGGCAGAG	0.344071	0.393412	0.329636	0.30855	0.266349	0.0843207	0.106908	0.161133	0.123093	0.0882263	0.353094	0.310101	0.374049	0.349716	0.0936733	0.811851	0.797426	0.759885	0.823702	0.809079	0.812072	0.811203	0.762887	0.798389
cg19787891	SPINK7	TGACAGCAGTATTGCTCTGGGCTGGAAGTTTTAATTGCTAAAATGAGAACTCCTTGAGAA[CG]AACTCAACTTCACTTCACCTTGACTACAGTGTTCCAAATAGTGATGACTCTGCCCACTTG	0.50622	0.551816	0.531625	0.55701	0.53474	0.327659	0.362003	0.180284	0.239306	0.292378	0.544391	0.563766	0.557497	0.561751	0.341098	0.799796	0.817213	0.793032	0.789869	0.79748	0.785125	0.80104	0.758224	0.780105
cg23645302	FLJ41562	TCAGGACAAAATTAATGTAAACTAAAAACAAACTGTATTTGTTGACTTTGTGAAACTTTC[CG]GACTGAGATGGTGTCTTAAAACAGTAGGCACACAATCTATGAGAATACAGTGGATAAAAA	0.619272	0.586849	0.592313	0.618283	0.580361	0.415661	0.422779	0.332927	0.426172	0.463242	0.564341	0.564422	0.658536	0.549331	0.374073	0.844677	0.899774	0.824602	0.824513	0.851739	0.857351	0.832911	0.827105	0.873466
cg07175433	KCNIP4	TCTCTTTCAAACATAGTTGAATTATCATCTCCCTCAGTCTCTCCACTGTTAGCAGGATTA[CG]TTCTGATTTTATAGCAGGAGTGCAAAATATGGGATTAGACAATGAAATGAAAAATGTATT	0.43178	0.458112	0.387202	0.401562	0.431161	0.270299	0.160336	0.19403	0.241763	0.110921	0.468862	0.425774	0.373452	0.47472	0.118223	0.828566	0.816496	0.78776	0.817221	0.840784	0.832851	0.788621	0.741677	0.817404
cg10577257	RIMBP2	GCTAAAAAGGCAACAAAAGGTGGGGCCTTTCAGATGATTTCAAATTTGGAGAGGAGACCT[CG]AGGGAATGAGCAGGGGCAACCTGGGGCCACCCCCTAAGTTGACAACAGTGCCTTGAAGTC	0.342855	0.292946	0.414755	0.399794	0.360094	0.131234	0.165416	0.103788	0.178764	0.117216	0.305014	0.385582	0.392714	0.339417	0.142908	0.823518	0.815194	0.791304	0.838236	0.824769	0.824202	0.821474	0.801033	0.836947
cg26068911	GPR98	CTCTCATGCCCATGGACCAGCAGGCAAATAAAAGAGTTAGAATGTTGCCCCTGGTGTACT[CG]ATCCTCTTTACCATGAGAACACCCAGGTTGCTGCTGCTCAGTGAAACTCAGAGGATTTGC	0.423634	0.36429	0.443787	0.337594	0.361386	0.250515	0.249437	0.120778	0.115427	0.110002	0.413862	0.489975	0.375771	0.38018	0.0887385	0.842133	0.805496	0.837133	0.835539	0.82892	0.852062	0.813278	0.795337	0.80855
cg16891431	TCERG1L	AGTCCATCTCACTATCACCCGCAATGTGAAGGCAAAATTCAGAGATCACACATGTTCCTG[CG]TCCTACAGACCAGCAAACATTATTCCTTGCACGTCGCCACAGAGAGGCAACATTTTTTAA	0.492651	0.478752	0.46276	0.431344	0.421798	0.119002	0.282737	0.318601	0.302526	0.131699	0.497128	0.470953	0.444669	0.495579	0.143191	0.764752	0.825867	0.695294	0.848722	0.851849	0.817388	0.824889	0.782976	0.854221
cg10168086		GAGAGGACTCAGCTGCGTGTACACTGTCAGAAGAACAAGAAGCCATGAACCCATAAAAGG[CG]TTGACTAATCCTTTAGCAGATTGAAAATGATCCCTCCCAAATCACCAACAGACCTCAGAA	0.43675	0.399107	0.392747	0.397088	0.438353	0.202643	0.220071	0.153617	0.221178	0.121046	0.40714	0.434669	0.427078	0.447719	0.173843	0.756477	0.726546	0.739467	0.773199	0.737227	0.765312	0.784848	0.705072	0.750382
cg19212453		GGGGCTTCAGGGCATGGATCCAGAGGGTTTGAAATTGTGTGTCAAGTGACAGGGTTACCA[CG]TCTTGGTTTTTCAGAATTGATGCAGGGGAATACAAATTCTTTTGCCCAGTCTTTCAACAG	0.383978	0.332101	0.339664	0.369996	0.323475	0.121972	0.148085	0.134201	0.136292	0.283533	0.352492	0.3414	0.382397	0.349839	0.587642	0.80033	0.816934	0.81112	0.818296	0.786595	0.784737	0.775459	0.691873	0.782396
cg09957504	MFHAS1	TTTTGCTTTGCTTCAGTGGTCAAAATGAAGGACCCATTCAAGGGTAAGACCAGTCATAGA[CG]CACAATGGGAATGCTGGAGGAACACTGTGAGGGGGAGGGAGTTGGGAAGCTAAACAAAGC	0.762036	0.658672	0.712965	0.719008	0.604926	0.508972	0.166351	0.103906	0.300986	0.263533	0.589983	0.664636	0.595415	0.505346	0.236282	0.158682	0.146844	0.124223	0.143836	0.145874	0.136708	0.139348	0.152107	0.141589
cg05935075		GTGTCTGGGAGCTTTGGGAGTGTCCAGGGTTCACTCCTTTGGTGAACTTTGACATTGGCT[CG]TCTCTGAGTCACCTGAAGGCCAAAGCCCATGGGCCTGCGGGGCCAGACACATGGCAGCAG	0.41942	0.369595	0.358679	0.379039	0.30387	0.0843974	0.181024	0.0957093	0.115865	0.0672295	0.37354	0.383759	0.367728	0.389109	0.119539	0.838066	0.841007	0.819739	0.812077	0.814203	0.822071	0.838649	0.769127	0.828029
cg26915336		TAGCTTGGACTTCCTCAAGCATGCTGGCCTCAGGGTAGTTGTGCCTCTTCTGTGATAATT[CG]GGACTCCATGAGACCAAGGTGAAGCTGACAATTCTTTTAAAGGCTACCCCTGGAACCAGC	0.448231	0.506399	0.48064	0.47163	0.481647	0.202044	0.214924	0.127238	0.287168	0.160366	0.49875	0.527188	0.487273	0.488728	0.212811	0.82983	0.830488	0.80101	0.81893	0.816936	0.804972	0.828647	0.760805	0.837081
cg20582941	ARPP-21	AGCCTTCATTAGAGAAGAAGCAGGCAGCTTGAGACAGGTGGAGCTGGATCAAGCTGTGAA[CG]TGATTTGCTGGAAGCTGGTCATTAGTGTTAGAAACCCCGTCTTATTTATTTCATCCTTCA	0.338698	0.340067	0.391809	0.409659	0.293733	0.0709366	0.0795583	0.107772	0.0800586	0.146191	0.326981	0.399488	0.417824	0.389552	0.327484	0.827456	0.823861	0.821783	0.817718	0.819014	0.776843	0.789143	0.766648	0.796289
cg23710748		GGAAGGAGGAAGGAGATAAAGCCTAAAACCTTAATACAGCTTGGACCCCAGAGTACTAAA[CG]ATCGGAGCAAAGGTGAATGAGAAGTAAATCCTCTCCTTTAGAAAAGGATCAAAAAGAAAT	0.31509	0.430794	0.297568	0.328038	0.337701	0.143045	0.137559	0.139155	0.144426	0.166084	0.419536	0.35539	0.356148	0.371384	0.104424	0.830155	0.84135	0.835371	0.838964	0.850136	0.825553	0.814443	0.80761	0.83997
cg07930940	CCDC124	GCCACCTCTTTCCCCAGCATCGCACACGTATTAGGTGCCCAGTACATATTTATTGAATGA[CG]TGTGCAAGTGAGTGAGTGTTTACTACACAGAGAAAAGTGTCTGTATTTCCAGCTTGGGCT	0.381408	0.31975	0.344299	0.333884	0.256693	0.109676	0.125978	0.101977	0.114469	0.541061	0.296676	0.351417	0.326045	0.252389	0.561151	0.758032	0.786386	0.765937	0.783418	0.779089	0.763267	0.78423	0.739117	0.786404
cg11256628		GAATAAGGTCAACTAGCAAATACAGAGAGCCTACTATTCCCCCAACCCAAGCTCTTAAAA[CG]CACCTATCCCTTTTTTTCTATGGAGTTGATCTCAGACTGAATTCTGGCCTCTCTCCCCTA	0.443536	0.411485	0.455282	0.45232	0.492246	0.215109	0.257604	0.314538	0.172292	0.293489	0.433597	0.477423	0.484993	0.483527	0.28363	0.768619	0.729019	0.731843	0.765299	0.777983	0.741498	0.820455	0.783959	0.755584
cg21757437		CCACTCCCAGCCCTGAGCCTTGCAAAAACCTTATTTAATGCCTTGGAGCTGAGTGGATGG[CG]ACACCAGCTACATGACAACCAAGGACCAGGCATCCAGGATCCGAGTGTGTGCTGTAATCA	0.681297	0.698828	0.711386	0.722567	0.70391	0.431968	0.486187	0.537529	0.439031	0.390753	0.715578	0.765889	0.719329	0.713346	0.518585	0.878679	0.893543	0.895133	0.898011	0.887282	0.869096	0.893953	0.867779	0.888546
cg00575153	PLEC1	CTTCCCTAGGCACTGGCAGCCGTTGGGGGCGATCCAGGCGGACGAGGCCGGCGGAGTGGC[CG]CGCTCGGGCCGGCGATCGGGACCGCCACCGTGGACGACAAGGTGCTCGGCGGCTGGGCTG	0.440333	0.389234	0.460189	0.484803	0.467471	0.115187	0.168191	0.112867	0.101138	0.486766	0.414692	0.50065	0.485093	0.465174	0.347191	0.124801	0.118517	0.098878	0.111661	0.123863	0.128435	0.120457	0.112257	0.112831
cg18363918	IGLON5	CCGCCCCGCTGATGTGTGTCCGTGTTGTGCCCGTGTTGTCCCGTGTTAAGTGTTTGTGTC[CG]GCCCCGCCCCCTCCTCCTCCTTCCCCCCACAGACGGCTTCACCTCGGAGGGAGAGATCCT	0.313908	0.283098	0.410493	0.228784	0.311039	0.065337	0.0986652	0.0862418	0.139023	0.164019	0.310076	0.429856	0.241544	0.308461	0.0402827	0.803374	0.747715	0.812588	0.798026	0.840252	0.782634	0.970688	0.898353	0.969643
cg04436634	OR10Z1	ATAAAGACAATATAAACGTATATGTGGTGTGTGTATCTTTATATGTGATGTGTGTATCTA[CG]AATTTGCATGCTATCTATATACATATGTGTTTGTAATGTATGTGCCTGCCTGATATATTT	0.387127	0.335011	0.409437	0.458413	0.365678	0.0731089	0.168721	0.0958726	0.103721	0.0679214	0.368149	0.422536	0.450245	0.355533	0.120052	0.856337	0.853295	0.844002	0.832181	0.837926	0.829402	0.844433	0.803371	0.843709
cg17192954	C18orf2	CGTCCCTCTTCTTCTCTCTTGCTCTGCTGCATTGTTCTGCCCTTGCTGGTCTGCTGGTCT[CG]ACTTCCAGCTACTTGTGTGTGTGCTCGCTATAAAGGTCTTGGGTTTATATGGGCACAGGA	0.507768	0.486054	0.519315	0.521958	0.482959	0.251221	0.332774	0.293058	0.17866	0.259268	0.49343	0.516011	0.53128	0.479765	0.318998	0.758374	0.765235	0.762348	0.765882	0.773929	0.748878	0.739049	0.724688	0.77654
cg17057086	KCNQ3	TTTCATTTTCTTAATTTTGCAGCCAGTAGTGAAATATAAGGCAAACAGTGTAGATTTCTA[CG]GGGTGAGTTCCAGGAGCCCTGAGTTCAGGTCCCGTTCCAGTACCCACTATGACCCTGGTC	0.543908	0.522636	0.562797	0.555741	0.524262	0.298015	0.2721	0.261109	0.27914	0.182704	0.538822	0.53784	0.55669	0.539929	0.314944	0.802986	0.800538	0.836115	0.797431	0.817379	0.818349	0.833662	0.770841	0.809403
cg05667197	PIP	CTACACATAGCACTTCAGACAGGCAAATTAGGAGGGAAAAGAAAACTGAATCTGTAAACT[CG]GGAAAAACTGGTGTATCTTTTGAGGTCCCAGCCATTTTGAGAAACTCTGATGCTGAAAAA	0.392151	0.37627	0.372643	0.447985	0.449326	0.105809	0.194522	0.126895	0.187665	0.13891	0.360765	0.374693	0.412913	0.411504	0.161272	0.815175	0.829047	0.826661	0.832298	0.843028	0.80636	0.822751	0.762972	0.810003
cg09552510	MPEG1	TTTTTCCCCCAGCTCTGGCTGGTTACTCTGCTGCAGGGGTGTGCACTTAGAAAAAAATCC[CG]ACCCCACACCCTACTGCTTCCTCCACCAGAAAGTTTGGCTTTGCTTTTTGCTCATTCTCT	0.539271	0.546201	0.520046	0.553876	0.541487	0.238665	0.323129	0.196827	0.297772	0.410073	0.568878	0.551847	0.548778	0.569896	0.284073	0.830451	0.833778	0.799356	0.788605	0.822911	0.822373	0.846907	0.773535	0.797607
cg09356916		TGGTGGCCTCTTGCCTTTAGCCTACATCCTAGTCATGAAACAATGTTATGGCTTTTCAGT[CG]AACCTGGTCCTCAAAATATTCACATTTCATAATCATTTCTTCTACAAGTTTCCAGTGTCC	0.443826	0.374357	0.379082	0.428278	0.371644	0.157713	0.185114	0.243723	0.182661	0.0903547	0.445283	0.396708	0.446837	0.408303	0.0891094	0.825793	0.839311	0.833264	0.800314	0.804342	0.803845	0.786821	0.736414	0.807501
cg06708789		TTAAATGAAAAGTGATTGCAAAACCTCAATTACTTTTGCACCGACCTAATCATTGGCTGC[CG]CGGGCTCTGTGGGACCACATCTACGAATGTATCGTTCATGGCCGTTGTTCCTTGTGGAAT	0.455342	0.503152	0.471003	0.443194	0.549375	0.152872	0.258413	0.315038	0.349279	0.515236	0.514372	0.509216	0.510658	0.525014	0.202892	0.886607	0.8624	0.877199	0.860369	0.870619	0.873525	0.866123	0.85726	0.863442
cg15590780	USH2A	AGTCCCCTCAGTGTGACAAATGGCTCTTCAACAGGACCGCTGTCCCTCGTTGCCTGGCAA[CG]CTGCTGTAACCCCTGGTTACTCAGCAAATAGGCTGTAGCAGCAGGAATGCTGGAAGGAAG	0.407571	0.393776	0.449155	0.402626	0.32923	0.168063	0.198528	0.161818	0.104181	0.177487	0.431437	0.464561	0.402364	0.364152	0.299624	0.845005	0.818181	0.838792	0.830059	0.833101	0.825299	0.796921	0.771358	0.787359
cg17143643	CHIA	GCCTAGCATTCCATGATTGTTATTATTGGCCTTGGAAGAATTAGCTCTAAGGAGGCAGAC[CG]AGGGGAACTTGACTCAGCATCTTGAATGAAATTACAATTTGAAAACTTTGGTGAATGTGA	0.495794	0.511872	0.484907	0.429625	0.480336	0.33241	0.260719	0.164053	0.202565	0.143317	0.528645	0.486204	0.391861	0.486191	0.167895	0.82292	0.830128	0.824905	0.811085	0.82534	0.835363	0.784904	0.773839	0.819442
cg17413750		TCAAATACTTCTAATAGGATCGTTCCTGTACTCTCTTGTTCAATAATGTACATCAACAGC[CG]CCCCCAAAATTCTATCCTCTGACCTAGTCATTCCACTTTGGAAAATTTGATCTAAGAAAT	0.624157	0.593711	0.616961	0.594157	0.623142	0.23397	0.449127	0.324609	0.354017	0.436904	0.638105	0.625356	0.658095	0.644803	0.422469	0.781071	0.808336	0.808702	0.806257	0.804921	0.79427	0.816079	0.796366	0.842392
cg15571353	LOC284632	GCTGAATCTGGCAACCCAGGCCCTGGCCAACCTTTCCTTCTTGTCCAGGCCCCTAGCGGC[CG]CCAACTTCCCCAAAGCCAGCAGGCACGTGCAGGACATGCCAGCTTGGAATAGGTTTCCTG	0.454396	0.436789	0.491928	0.459093	0.428221	0.273942	0.177833	0.263695	0.251501	0.154529	0.458435	0.517066	0.473205	0.395698	0.230543	0.694945	0.690458	0.742358	0.732743	0.705718	0.680857	0.721472	0.736693	0.78043
cg18222913	TMEM132C	ACGGTGCTGGAAACTCCAAGCAGGAGAGTCAGTATGATCTGGAGATGGGCTGCAGGGGGA[CG]GGTGCCTCATCACCCATGAGTTCTTGCATCTTGTTAGAAGGTCTCTCAGTAGCCAGATAT	0.441336	0.400651	0.479936	0.391466	0.446178	0.123863	0.285289	0.166875	0.200436	0.133381	0.469904	0.496187	0.434677	0.46016	0.12633	0.844695	0.856796	0.7573	0.821312	0.852593	0.834012	0.84631	0.781816	0.848884
cg15415194		TGAGAATGAGGAACTGTCCCTGTTTTGTTTTCTTTTACCCAGTCAAGTGTGTCTCAGCTA[CG]AGTTTGAGCATATCTGCTTACAGGGAAGCTTGTTGAGTGTGTCAGATATTTTTGGGCCTC	0.407713	0.366148	0.442736	0.414092	0.330886	0.0825801	0.142987	0.137577	0.108706	0.0778913	0.403516	0.411846	0.441801	0.392686	0.167569	0.785686	0.779449	0.791215	0.77721	0.776774	0.741262	0.779944	0.771216	0.791954
cg03421657	FAM78B	CTTGATGGTCTGCAGAATGATCTTCTCCTTTGTGGTGGTGTTCATGGCCACCAGCCAGGT[CG]TGAAACTTTGGTCTCTCTTGATTCTTGTGAGCAGTGGCACATTGCTGTCACTCACAGGCA	0.425694	0.44621	0.447457	0.428016	0.406435	0.227607	0.210293	0.174393	0.118733	0.260864	0.474226	0.460687	0.421141	0.480425	0.221651	0.808612	0.813274	0.828251	0.796304	0.80896	0.787698	0.788137	0.706473	0.789644
cg15361215	FAM45B	GCTTCAGACCCCACTTCCTGCCCAGAAGGAGGCCCAGAGGGTTTCTCAGCTTGTGCAGTG[CG]TGGCATTGTAGTATCCTGGATTTCTTCTCCCGTCACAGTGCAAGAGAAGTGAGGACTCGG	0.571001	0.516276	0.524946	0.558855	0.586673	0.301814	0.0872966	0.0649368	0.080139	0.0799063	0.331068	0.289114	0.281918	0.377482	0.0905148	0.861121	0.865536	0.846205	0.844394	0.852468	0.823431	0.852489	0.821334	0.856294
cg24828648		CCCCTGTTGGGTGGTGTTCAGCCACCCAACTGTTAATATATAAGGCAGTGTTCCTAAATG[CG]AAATTGCATCAGTCTATGAAACAATGGGCAGGAAAAGAATTGACTCTTCTAAATATAATT	0.452335	0.424026	0.438025	0.502823	0.416418	0.140807	0.21241	0.0665668	0.272843	0.0904635	0.452976	0.455915	0.531108	0.435809	0.148583	0.844246	0.827861	0.814742	0.836186	0.854444	0.839408	0.817063	0.768868	0.830352
cg12144446		GATCTATGTACATTTCTTCCTAAACCCAAAAGGTTTGCCAAGCACTGTGCTGCTTTCCTT[CG]TGATGAGATATGCAAAGCACATCTTCTCATCTTATACTTTAGAGGAGAAAATCTGACAAG	0.483422	0.5197	0.567487	0.501123	0.473861	0.225047	0.356131	0.291204	0.277336	0.150403	0.586272	0.566725	0.495415	0.487424	0.19545	0.860753	0.845847	0.848119	0.856407	0.849686	0.84703	0.859191	0.830083	0.861719
cg14119936	OR51F1	AGAGGAAATAATACATGGGTTCATGGAGACTCTGCTGGGTAATGATGACAAACAGGATCA[CG]CTGTTCCCAGAGAGGGCAATGGCATAAAAACAACAGAAAGGAATGGAGATCCAGACATGG	0.591503	0.570263	0.566393	0.55618	0.617529	0.199665	0.416983	0.380358	0.399437	0.288809	0.621214	0.58287	0.555032	0.611795	0.303742	0.887541	0.864687	0.861462	0.878288	0.856819	0.847425	0.831603	0.816411	0.857583
cg14600420	SPAG11B	TTGCAGAGCCTTGTTATTCTTCAGATTAGACACATCATATTTTCTTCAAGCTGTCTTCTG[CG]TTATTTAACCAGTCTACAACAACCATATCTCACCATGAGTCTTACCTAGACATGGATTTT	0.542318	0.499175	0.536366	0.523175	0.562307	0.350677	0.305075	0.271947	0.364197	0.357696	0.553491	0.542762	0.534179	0.580808	0.417172	0.831005	0.84043	0.856955	0.861705	0.845501	0.828189	0.828276	0.784036	0.845959
cg09257456	MS4A12	TAAGAAAGGTGAATAATAGGTTCAACTGTATGCCATTCCATGAACATGGGCCCAAAAGGA[CG]AGGCCATGCCCCACTGGGCACTTGATGATTATGTGGCTACCACAGGGACAACATAGAACA	0.465159	0.444178	0.496486	0.505125	0.500273	0.251634	0.307124	0.189452	0.317723	0.19122	0.496958	0.546047	0.494887	0.520955	0.355546	0.840751	0.845537	0.81728	0.836538	0.858511	0.855324	0.844616	0.784984	0.869576
cg16356737		CCATTTTCTAGAACTGAGCTAGTTCAGGTGCTGCCTGAGTCATTCACCTACAGAAAACCA[CG]GGATGGGTGTGAACTGATCATCTACCTTCATATATATTTGGCATTTTAAAAAGTTAAATA	0.466092	0.401769	0.443574	0.426075	0.390958	0.134055	0.190364	0.165882	0.185181	0.133364	0.453921	0.439747	0.435564	0.435378	0.101387	0.773471	0.758765	0.764708	0.765742	0.796734	0.781634	0.784934	0.728067	0.794814
cg04943586	RFX4	ATGTGCATCTCCTATAGCATCTCATAAAGTGCTCATCAAGCAGGATAATATCAGGAAACA[CG]TGTTGATACCTGAATCAATGTGTGTAGTCATGCTCAGGCTGCTTGTCAGTTTCTTGAAAG	0.483637	0.45904	0.492962	0.405603	0.456743	0.282471	0.256955	0.216539	0.265202	0.148139	0.544977	0.511664	0.43363	0.528077	0.367716	0.786899	0.785784	0.771808	0.76974	0.774857	0.775993	0.794033	0.756817	0.774819
cg24923953	NPFFR2	ATGGTCCCTGGTTGAACTCCTCTCCAACCATAGTCTCCAATGCCCAGCTGTTTTTTTTCT[CG]ATGTTCAGATGCTTCTTGTCTTCTCTCCTTCTCTGCCGCACCACTCTGCTGCTGTGCCAT	0.526224	0.480217	0.515606	0.54984	0.459108	0.215731	0.342406	0.25817	0.335444	0.170949	0.516688	0.488075	0.592742	0.500204	0.173199	0.886731	0.890469	0.884998	0.865668	0.871636	0.855684	0.874438	0.831255	0.84064
cg02553039		GGACACTTTTCAGAACTGCATGGAGAGTGCACTGCAGGTGGGGTCTATCTGTACAAAGAC[CG]TGAAGGCACCATCCAGGTGCAGAGACAGGAGCTTGGCGAGGTAACGGGGGCGGGGAGGGG	0.489876	0.45445	0.47168	0.524381	0.4825	0.224344	0.324786	0.28904	0.293706	0.120802	0.488226	0.498897	0.541392	0.519013	0.171056	0.59674	0.592006	0.450726	0.725575	0.741674	0.776568	0.799801	0.749337	0.810933
cg05280527	NRXN3	ATGTCAGAACTGCTGGAACTATGAAATGGGGTATATAACCACGACTCTGGTGGGGAAAAC[CG]TTTTTTAAAGGACACACACACACACAGCGATGCATCTCTCTCTAAAGCTCAGCCACGGCT	0.362701	0.339314	0.369644	0.417723	0.274848	0.150372	0.175302	0.0797398	0.171609	0.124625	0.374259	0.384817	0.369673	0.305328	0.086051	0.820363	0.815201	0.791457	0.770296	0.828529	0.804059	0.80957	0.793991	0.793902
cg10945131		TCCCATGCAAAGCAGCATGGCTGATCACCCTACTTGCTGCCATGAGACTACCACCATCCT[CG]AGGATGATAGATCCCAAGGAGAGAGTGACCCAGTCAACATCCAGCCCCATCAGCATGTGA	0.522716	0.519659	0.545523	0.549728	0.503556	0.117667	0.328516	NA	0.270782	0.345927	0.5325	0.540822	0.547562	0.522452	0.398081	0.805221	0.778233	0.779003	0.765705	0.780677	0.788664	0.796197	0.741924	0.78555
cg01777433		GGAGGGAGGATCACTTGTGGCCAGGAGTTTGAGACCAGCGTGGCCAAAGTAGTGAAAACC[CG]TTTGTAACAGAATTTGTGACTTTCAACTGGGCACATGTCCAATCAGAATAAAGATGACAT	0.544313	0.49425	0.474002	0.466676	0.502905	0.288673	0.206085	0.312104	0.14273	0.35617	0.496016	0.521894	0.515715	0.518599	0.468337	0.809519	0.882618	0.828697	0.845428	0.808511	0.852477	0.812665	0.778809	0.832979
cg10103000		TTCAAAGAAACGTTTTGAGCTTTACATTGATTGGACCACCCTTGAATTAGAATATGGCAA[CG]GTGCTCTCCAAACACTGGTTCATTTCTGACCCAGTAACTGCAGTAATGAAGACAGAATTT	0.551164	0.571363	0.550746	0.474458	0.521408	0.282343	0.261057	0.243658	0.365335	0.227231	0.634598	0.56997	0.503894	0.577746	0.270288	0.859452	0.865594	0.869346	0.867165	0.856272	0.865609	0.856492	0.856258	0.87271
cg20207327		AATGCACTGACTGAAGAAACAGCACACTTACTGCTGGCAAGACTCTGAAATAATGGGTAT[CG]TGGCATGGTTTGGGAAAGTTGCTTGCCATGGAATGTGTGGTTCAGGCAAATCGTTTATCA	0.54353	0.419284	0.446255	0.454163	0.474182	0.319005	0.283688	0.162778	0.202352	0.300694	0.253215	0.28117	0.347441	0.329688	0.170744	0.886798	0.870057	0.860643	0.835758	0.857033	0.882631	0.860213	0.878413	0.86819
cg14717069		TCTTATGATCAAGCCATCCAGCTATGGTCCCTTTTCATGACAGCAAAATTAAGCCTATGT[CG]TGGTGTCTCCCTGTTTTGCAACTAGGAATAAGGACTTTTGCATGTCAGATAGACTGCAGT	0.36839	0.326439	0.422436	0.436035	0.353907	0.119897	0.209943	0.155584	0.177609	0.138548	0.379183	0.422251	0.463514	0.398045	0.137734	0.828531	0.810766	0.804867	0.810117	0.797105	0.796865	0.82652	0.778347	0.832792
cg09780964		GGAGTCCCCAGTGCCAGCTCGGAGGGGAGTTGGCACGGATGGAGGCTGGCCAGCGTCTCG[CG]GCTGAGTATAGGCACGCTTCTTTTTTTTTTTTTTTTGTATTTTAAACACACACACATATT	0.416862	0.291484	0.386499	0.439327	0.447577	0.138329	0.033225	0.0181534	0.231012	0.731704	0.309219	0.388275	0.424326	0.367786	0.685786	0.958124	0.957533	0.959895	0.955334	0.956487	0.942851	0.959484	0.918308	0.95387
cg21546211		CAGCTTATCAATTCCAAGTCATCTAAATTCTTCAGATGGTTTCTAACCTCTACTTGTACT[CG]AAGTTAATATTCCTACTCATTGATTATGATAATTTCTTGTCCTGCTAGGATAGCAGGGAC	0.523812	0.470782	0.485345	0.486764	0.465898	0.0999849	0.154013	0.378444	0.091993	0.116194	0.524628	0.500379	0.537848	0.485276	0.383594	0.754978	0.768066	0.801509	0.767405	0.758753	0.744294	0.745206	0.717002	0.770587
cg21987076		AACCTACTTCACCTCAATTGCCAGAGGCGACTGTCTCATTCCATAGCCAATTATAGTTCC[CG]TGGATATTTTTGCTGCCTCTCTTGAAGGGAAAAATTATACTAATAAGTCAGGATTAGAAA	0.311917	0.367227	0.342321	0.397864	0.379317	0.0930864	0.204665	0.16376	0.112722	0.46287	0.394782	0.337163	0.36364	0.411902	0.286915	0.773378	0.743122	0.773982	0.749011	0.773931	0.757479	0.752927	0.703412	0.685057
cg24470332		TTTTCAGGTAAGTCACTGGTATCATATTGAGTTCACTTGGTGAGATTATATTTTCCTGAA[CG]TTCTAGATGCTTGTGGATGTATGTCGATGTCTAGATATTGAAAAATTAGGCATTTCTTCT	0.522941	0.503896	0.515023	0.5743	0.529424	0.278667	0.31114	0.317557	0.383893	0.426255	0.542157	0.537923	0.539795	0.514121	0.257295	0.777737	0.769196	0.753324	0.749338	0.74415	0.732792	0.764285	0.767608	0.78124
cg11064524	EXT1	CTGAGGGCTGAGGACAGAGGAGAAGCCAGCTCCCTAAAGGGAGCTGTGGGAAGAATAATT[CG]GGAAGTGGAAAGCATGTATGCAGAGCCCCAGGTTGCAACATTCTGGACACACTCAAGGAA	0.384654	0.318205	0.352963	0.412346	0.407566	0.160131	0.153691	0.21128	0.157227	0.294827	0.297459	0.376004	0.430652	0.382724	0.487297	0.746153	0.742414	0.724337	0.73193	0.746671	0.738914	0.766252	0.71444	0.7523
cg26837853	CSMD1	ACACAGCACGTCCTGCTTTCTCTGTTCCCTCTTCTGGGGAGGCTGACTTCACAGTCTGTG[CG]TGTATGAGGGCTGGTTCTCAGCAAGCAGGGACCTGTCCAAAGGGGATCCTGCCCCAAATC	0.546032	0.488483	0.525162	0.495401	0.459316	0.188338	0.352287	0.174683	0.205156	0.337902	0.490176	0.538904	0.525091	0.496198	0.316682	0.594433	0.654383	0.501494	0.83408	0.792406	0.846348	0.830838	0.796472	0.844492
cg13321399	GPR133	TTTTTTGAATGGTGTCAGTTTCCTCACTTGCAGCTTTTTTTCAGTCCCGGGGTCTCATCT[CG]GCTGGCACAGAGCGCTTAGTTGTCACGTCTCCTAGGCAACTGCAGTCTGTACGGGTTCTT	0.490282	0.503601	0.478399	0.428342	0.47468	0.220373	0.287208	0.23148	0.360637	0.333996	0.505575	0.448827	0.421584	0.449752	0.465459	0.807758	0.788012	0.795912	0.772386	0.786025	0.783909	0.80675	0.752065	0.814844
cg11397878		TCCCTATATCATGCATTCCATCCATGGCTTTGCCCCTTGACTTTGGGTTTAATCTATGTG[CG]TTGCTTTGGCCAACAAAATGAGGCAGAAGTGATGGTGTCAAGTCCAAACCTAAGCTAAGT	0.551627	0.465726	0.523311	0.518548	0.453319	0.162557	0.296673	0.259569	0.331066	0.241193	0.527021	0.566795	0.553001	0.514248	0.201395	0.902576	0.886636	0.8517	0.882426	0.888144	0.86928	0.888533	0.853052	0.902524
cg00687073		TCGGCCACAATCAGGGTTGGAAGTACCTAAGTTGTCATCTGGAATCTCCCTTTGGCCTCA[CG]ACTCTCTTGAGTTTCAGACCCTCCTGTATAGTGCCTGTGAAGGGATCGGATTGTGTCCAC	0.432608	0.379329	0.394693	0.42535	0.340936	0.212252	0.146918	0.164564	0.203513	0.249046	0.432488	0.387628	0.421319	0.420644	0.153627	0.799591	0.789333	0.780798	0.786787	0.791856	0.776442	0.789551	0.730403	0.796719
cg09081266	OR12D2	TATGCACCTGTTCTTTTCACCTATATCCATCCTGCGTTAGAGAGCTTCATGGACCAGGAC[CG]GATTGTTGCCATCATGTACACTGTGGTCACTCCTGTACTAAACCCACTGATCTATACTTT	0.586037	0.606772	0.579544	0.643873	0.599048	0.347328	0.410987	0.325351	0.489457	0.327514	0.589898	0.598076	0.652806	0.557887	0.382022	0.882534	0.886489	0.861471	0.862858	0.875225	0.845009	0.868959	0.830679	0.865705
cg20707921		CCAGCATTCCTTTATGATTAAAATTCTCAGCAAAAGCAGCATACAAGGGACATATCTCAA[CG]TAATAAAAGCCATCCATCTCTGACAAACCCACAGCCAACATAATACTGAATGGGGAAAAG	0.498076	0.471579	0.510629	0.536027	0.498976	0.154795	0.196291	0.25572	0.400194	0.383817	0.473972	0.581178	0.558921	0.522279	0.387417	0.798288	0.782506	0.818483	0.772409	0.806103	0.748978	0.767932	0.735242	0.790855
cg20385708	VIT	CCTGAGAGTTTTCTAAGCAGGAAATTTACATGAGGAAGACAACAATCAGTGAGATAAACA[CG]ATATTCTCCACAGGCAGTAGAGCTACATTCTGAAATATTTCCATTTACTTTGGAGTCTGT	0.625621	0.659891	0.704455	0.724261	0.710474	0.493373	0.52506	0.33135	0.494526	0.38132	0.664062	0.785705	0.730874	0.628253	0.630066	0.406266	0.435396	0.397241	0.414999	0.345603	0.380038	0.323531	0.286433	0.331786
cg19336191	RDX	TATAAAGCAGTCAATAAATGCTTACTAATGAAGAGCTCTAACATTTATCCAGGAGAACTA[CG]GATTATTGTGCCAAAAAAGAAACTTAAGTCTTCCACTTCCATCTAAGCCTTAGAGTAACT	0.45403	0.468959	0.540618	0.488443	0.532937	0.179875	0.256201	0.212772	0.193187	0.136615	0.518729	0.49182	0.475933	0.528441	0.151024	0.869878	0.821217	0.852417	0.839537	0.871923	0.847154	0.878568	0.825447	0.859222
cg16851282	MRGPRE	GCCGGTGTCAAGAAGCTGCCGCGCGGTCCCCGGCCGAGGAGAATCAAACACATACAGCAG[CG]TCAGGCTCCGGGAGACCTCGTGAACTCAGTGATTTCAAGTCCCGTTTCAGACCGTGCCTT	0.41935	0.356503	0.412607	0.334066	0.283652	0.112467	0.227876	0.187822	0.084295	0.32693	0.335765	0.414234	0.322314	0.290453	0.523366	0.832066	0.811551	0.844859	0.842729	0.828555	0.811176	0.843263	0.81868	0.842859
cg24936695	CLDN17	TTGCCTTTACTTTGAAGACTGGTTCAATTCGGAGTGGTAGAAGATGCTCAAGATGTAGAA[CG]TGGAAGCCTTTTGAGTCTAGAGAAGTCTTTGATGATGTTCTCCTTGGCTGCTGCCCATAA	0.593715	0.552923	0.5963	0.574925	0.547963	0.3903	0.410622	0.26697	0.332726	0.328246	0.580017	0.604606	0.591651	0.582061	0.279167	0.753105	0.750904	0.862908	0.852944	0.811781	0.843238	0.853345	0.798955	0.84519
cg22621542	TCP10L2	CGGGAGCTCTGCGAGAGTTTTGTTTCCGTGGAGATGGCTTCTGCTGCCTCAGAAAGAAAG[CG]GGTTTATCCTCTCAGCACAGCAAAGTGCCCAGTCCTTCTGCCGAACGACGAGTGGAAGCC	0.470911	0.544401	0.456597	0.453371	0.515907	0.130288	0.227502	0.227937	0.37759	0.589659	0.562334	0.479377	0.429725	0.513952	0.769017	0.79938	0.784121	0.824019	0.792472	0.822749	0.813004	0.830651	0.819911	0.819444
cg10954740	KCNV1	GAGAATCTTCAAAAGAAAGGATATAAGAGGGACATGGTAATTGTTATGCCATTATACAGA[CG]AGGAGGCTGAGGCATAAAGAGATAGCTTATCTAGTAGAAAGCTACAGAGCCAGGATTTAA	0.348503	0.345764	0.355864	0.437731	0.397536	0.134098	0.113978	0.0962169	0.211767	0.143984	0.396006	0.34692	0.494331	0.369161	0.161638	0.84342	0.809343	0.824249	0.83967	0.818371	0.828636	0.877645	0.771112	0.837277
cg12200412	CD1E	GGCTCAGGATGGCTGGGTGACCTGCAGACTCATGGCTGGGACACTGTCTTGGGCACCATC[CG]CTTTCTGAAGCCCTGGTCCCATGGAAACTTCAGCAAGCAGGAGCTGAAAAACTTACAGTC	0.384774	0.326815	0.332946	0.375725	0.294449	0.116732	0.178033	0.143207	0.0846933	0.0998252	0.337935	0.336475	0.375857	0.334335	0.111126	0.762963	0.761014	0.764655	0.767201	0.768945	0.737729	0.759	0.69704	0.785516
cg16444103	C15orf50	CATAGGTGCATTTTATATGTATAATGGTTCACAAATCACAACCACCCATCAGGTAACCAT[CG]CTATCCCATTTACAGAAGAGAAAACTGGGGCCCAGAGAAGTTGAATCATTTGCCTCAGGT	0.596057	0.600731	0.613489	0.613771	0.613126	0.381771	0.421983	0.411089	0.377569	0.458029	0.635264	0.644924	0.61935	0.66191	0.429053	0.804036	0.814132	0.789175	0.808875	0.804821	0.794144	0.805792	0.763853	0.816129
cg01876176		ATAATGTACTCATTCCAGCATGATCACTCAGCCTCTTCATTTCTCCTTTTAGAGTATGCC[CG]GGTGATTCAGGCACTACTTCACTCATTGTTGGCCAGTTCTCCAGGCTTTTAAGATGCACT	0.376428	0.375052	0.256491	0.258137	0.327174	0.0943104	0.11088	0.138061	0.0856652	0.0803336	0.301979	0.263183	0.232977	0.382773	0.0849635	0.852951	0.840194	0.83689	0.822766	0.834661	0.833469	0.839006	0.79676	0.849658
cg18125836	LIMCH1	TGTGTAGGGTGTGTGTGTGTGTGTGTGTGTGTGTGTGTGTTTCCATCTCTGCGTCCCCAG[CG]CCTGGCCCAGTGCCTGACGCATAGTAGGTGCACAGTGACTGTTGGTTGACTGCATCGACA	0.493483	0.466404	0.484492	0.499507	0.419809	0.181245	0.344861	0.336639	0.195172	0.132809	0.496929	0.476128	0.502566	0.442046	0.0920626	0.14714	0.127658	0.178186	0.18305	0.149033	0.133407	0.127383	0.186415	0.149033
cg08177882		ATGAGATATTTTTAAGTAAGAAAAGTAGGGCTCACAAAAGAGTGTGAAGTGTGTACAATA[CG]ATTCCATGTAAATAAAACAATTGTAAATAAACCCTTGTGTATGTATGTACAAGAATATAT	0.562431	0.529806	0.501775	0.555531	0.495178	0.24813	0.250632	0.192168	0.440786	0.29251	0.562266	0.580107	0.575784	0.528485	0.313726	0.827726	0.834457	0.823282	0.822572	0.864878	0.847838	0.864466	0.804979	0.847206
cg25853612		GTTGATTTGTAATCCCCAGTGTTGGGGGCAGGACTGGTGAAAGTGATTGGATCATAGGGG[CG]AATTTCCCCTTGCTGTTTTCATGATGATGAGGGAGTTCTCATGAGATCTGGTTGTTTAAA	0.451256	0.412138	0.444322	0.468436	0.413333	0.265997	0.341207	0.123152	0.197959	0.39338	0.487119	0.447254	0.439275	0.423363	0.197005	0.720309	0.732381	0.722979	0.689864	0.733652	0.692321	0.73956	0.679017	0.713501
cg02520399		CTTGCTCTTCCTTAAACACTATCTCTGAAAGATCATCCTGAAGCATTTTCCTTGGAGAAC[CG]GCCATAGGCACCAGGTTGGGTTTGCCACAAGGGACCAATGCAGACCTTGTCAAAGAAGTG	0.430671	0.42818	0.401137	0.409236	0.474605	0.0802632	0.116977	0.084602	0.0899921	0.0621566	0.4585	0.380762	0.378838	0.49471	0.0763941	0.812408	0.801887	0.819204	0.817795	0.7992	0.788015	0.821865	0.74207	0.832744
cg20253561	RYR2	TAGATGGGCTCATTTTGTATGATGCACAGATGATAGATTTGGTAGATTCAGCCTGTCAGT[CG]CTCAGGTTCTGCCCCAGAGGTCAATGTAGCTGAGGCAGGTCCTTCAGAAACAATGTAAAT	0.457834	0.422631	0.493556	0.432829	0.477244	0.165912	0.256479	0.208687	0.207107	0.126572	0.462213	0.492139	0.427143	0.488294	0.231001	0.696403	0.705888	0.735861	0.722035	0.727692	0.723027	0.743109	0.706592	0.735909
cg06238661		AAAAGGATTGAGGAGATGTGTGAGTCCTGGCAGAGGGCAAGAGGAGAGCAGAGGGAAATT[CG]GCCCTCTCTGAGTGTCGATGCAACCTCCCAGACCCCTCCAGGATCTAAGGCAGGCAAGAG	0.5075	0.524597	0.519912	0.560745	0.532129	0.328696	0.316407	0.167466	0.174742	0.461668	0.541112	0.541437	0.583898	0.536221	0.338102	0.850487	0.858419	0.830869	0.834178	0.8598	0.842375	0.832583	0.763103	0.824889
cg07260541		GGTTACCATTCTACTTTTCTTGTTTGGGATCTCTCAGACAGATGCAGCCATCATCTAAGA[CG]ACTTTTCTCCCATGCCTGGCACATGGGCAGAGGTGGCTGGCAGGCTGGGTCTTCCCTCTC	0.307453	0.30725	0.379191	0.35733	0.25475	0.0721548	0.111687	0.109992	0.0883517	0.091222	0.407815	0.388033	0.36309	0.341987	0.117661	0.79746	0.772203	0.788859	0.788107	0.804072	0.78713	0.774476	0.727615	0.798951
cg22720431		GTGTTTTGTGCTCCAAGAAGAGTGAGACATAAGAGTTTTCAATAATATGTTGCAGCTTAA[CG]AGAATGTAGGAGAAACCTGTTATACCAGTTGGAGATCAGACTTGAAAAAATGGATTTCCT	0.470125	0.373564	0.468304	0.388894	0.4114	0.169213	0.329339	0.136122	0.160723	0.149005	0.421335	0.455297	0.388596	0.419718	0.231902	0.830119	0.833262	0.839563	0.833527	0.813639	0.832231	0.80245	0.798182	0.844265
cg10832076	SLCO1A2	AGGAGCTGTCTCTGATAATCACCTTGGTTCAAGGAGCATGAGTGATTTTTAGATGGTGAA[CG]TTCAGTCAATGTATGATTTATGCCAGGAGAAGTGGGATAGTACCCTTTTTGGAAGGGCTA	0.410485	0.380646	0.418302	0.462093	0.343357	0.16397	0.237954	0.1012	0.223967	0.146834	0.42373	0.428727	0.503597	0.33768	0.276449	0.826949	0.827212	0.800012	0.794438	0.830877	0.775778	0.793172	0.770979	0.826499
cg02583620	CALCB	TCTGGGCCTCGTTGCCCACTTCCTCCTTGAATGGTAAGTGCAGGGTTTCAGCCTGTGCCC[CG]TGGCTTGGAATTGTTTTTTCTTCTTTCTTTTCATGATGGTCTTTGGGCAGAGCTCCTGGT	0.462893	0.387489	0.410138	0.428374	0.344643	0.140785	0.172252	0.161749	0.234162	0.566001	0.337754	0.453029	0.427464	0.37108	0.570819	0.805565	0.813842	0.813435	0.806979	0.837834	0.843143	0.860973	0.785844	0.838256
cg15168816	RBM24	CCTAGGGCTCTTTGCCGAACTGAAACAGAGCATATTAAGCTTCCTTCCTAGAGATTTAAG[CG]TGCAAATTCAGCTGCCGAAGAGCAGGGAGCCCCAGAGTAGGACAATAGCTATTGTCGTTG	0.405259	0.540822	0.482918	0.458615	0.460086	0.282518	0.207293	0.243645	0.124292	0.0991545	0.555529	0.516496	0.4638	0.492527	0.134919	0.0669817	0.0838814	0.064803	0.0799327	0.0776914	0.0791212	0.0677092	0.0707356	0.0753124
cg16391678	ITGAL	CTGGACGTGCGGGGCGCGCGGAGCTTCTCCCCACCGCGCGCCGGGAGGCACTTTGGATAC[CG]CGTCCTGCAGGTCGGAAACGGGTGAGCTGTGCCCCACAAGTCCTCCTCCTGATGCCCGCC	0.228619	0.311288	0.412995	0.382306	0.324191	0.103891	0.0922975	0.116258	0.0983621	0.0677456	0.311833	0.449114	0.41608	0.362818	0.13238	0.80757	0.672773	0.795614	0.811043	0.891977	0.886577	0.91218	0.899858	0.945141
cg08564874	NPSR1	GCCCTTCATTATAGACTCAATGCCTTCTCATTGCTAGAGCACTGTGCCCTCCTTGGGGCT[CG]ATGGTTTATAATAAAGCTTCCCCAGGAGATCTCATGGGGGCCAGGTTCTTTAGTGGTGGC	0.503536	0.476286	0.527075	0.548824	0.514883	0.136941	0.26855	0.147717	0.25957	0.12576	0.516933	0.538938	0.544791	0.480872	0.138488	0.838234	0.823633	0.828147	0.824346	0.827571	0.816732	0.807818	0.768103	0.829807
cg07436074	PARK2	ACTGTGATGACGCCCAGATCATACCAGTCCCCAGAGGTCAAGTTATCTCAACCTACAGGT[CG]TTCCAGATGATAACCCAGTAATTTTGCAACAAAGGCAAGCCAGCTCCTATGTTCTGCTTA	0.444579	0.397802	0.455634	0.467541	0.426179	0.172126	0.183368	0.179289	0.197274	0.134078	0.43053	0.448578	0.455112	0.412961	0.17	0.763449	0.78606	0.792444	0.774958	0.762655	0.750608	0.758189	0.696668	0.72295
cg21594383		TGGATTTTACAATTTCACAAGTGGACGTGTGGCTGAAAGGCCAGTGTGGGGGATCCTGGC[CG]GGATGGGCACTGGGTCCCCTCCATGCACCCTTAGGGAACATCTTCTTTCATGTTTGAAAG	0.55819	0.556159	0.618419	0.60649	0.59493	0.318256	0.245695	0.324336	0.37355	0.46707	0.627385	0.64622	0.654454	0.609346	0.310397	0.857242	0.849438	0.854307	0.847277	0.8672	0.851332	0.872173	0.830913	0.849241
cg16408856	VWA3B	CTTCCTTGGCTTCAGTAGTTTCTTCACATGCATGCCTTGATCATTATTTAGCCAAAATTT[CG]AGGACACCCTTCTGCAGATCTCTGGAGCATGCTCTCTCTCCCTTTCTCCTGTGCAGTAGT	0.457078	0.449938	0.515613	0.501868	0.467352	0.0703567	0.2169	0.169586	0.371064	0.0956718	0.493866	0.510139	0.518019	0.469201	0.240658	0.819919	0.790406	0.812352	0.809084	0.841831	0.806076	0.822148	0.75463	0.816827
cg23853861		CTCCGATCAAGCCCAGCAGGGGCCGGCAGGTCGCGCCAAGTGCGGGGCCCACCGAGCCTG[CG]CCCACCTGGAACCCGGGGCAGCGCAGCCCCAGTCCCCGCCTGCGCCTCTCCCTCCACGCC	0.532898	0.459911	0.560559	0.440776	0.503567	0.203969	0.329357	0.329601	0.298032	0.602	0.472111	0.553406	0.423547	0.493407	0.82034	0.879758	0.725171	0.734644	0.756783	0.920482	0.910485	0.904234	0.900177	0.933014
cg14338590	PLEKHA7	ATTCTGTGAAGTATTATTAGTCAGATTTTAGCAATAAGGAAACTGACTCACAGAGAAGAT[CG]ATTATTTGCTCAAGATCAAACAGCTGGAACAGAGTGGAGCCTGGGCTTAAACCCAGGTAG	0.461178	0.464581	0.485373	0.504672	0.523379	0.32352	0.209373	0.239694	0.131817	0.297765	0.502146	0.503257	0.523087	0.494526	0.183626	0.796867	0.798964	0.822664	0.794078	0.807233	0.804043	0.789582	0.744664	0.812911
cg03020635		GAAACCTCAAGTAGTTTAGTGAAGTGTAGCACACCTCCTCAGGGGTTGCACTTTGTACCT[CG]CTTTTGGGGGCTGCTGGTACATGAGTCTGGTTATAAGTCTAGAAGCAAAGAGGAGGGGTG	0.495097	0.382195	0.428603	0.412833	0.408292	0.218234	0.191828	0.206952	0.273845	0.13065	0.38761	0.457479	0.413055	0.410191	0.183255	0.822784	0.825441	0.770364	0.802015	0.804938	0.794433	0.775974	0.766466	0.798797
cg14933439	C16orf78	CATCTGGAGGCCACACCCTACCTTCTAAGTCACCAGGCCATCAAGTCCAGACAAAGGGAT[CG]AAAGAGTGAGACAGTGCCAGCCACCTCCCACCCAAGCCACTAGCAAGACTCCACAATGTC	0.492171	0.453914	0.444966	0.508797	0.468531	0.255464	0.3501	0.184318	0.186328	0.143003	0.483669	0.501075	0.540494	0.46361	0.175581	0.813626	0.841114	0.807424	0.78994	0.813093	0.800149	0.795	0.734139	0.80097
cg09272256	AKR1C4	GTGGCAAGCAATGGATCCCAAATATCAGCGTGTAGAGCTAAATGATGGTCACTTCATGCC[CG]TATTGGGATTTGGCACCTATGCACCTCCAGAGGTAATAATCACATTTTCAGCATTGAGCA	0.457164	0.360584	0.366057	0.458239	0.36403	0.14104	0.197781	0.133598	0.155178	0.158215	0.368058	0.376869	0.462643	0.428813	0.173894	0.822554	0.810584	0.801611	0.847177	0.817706	0.839987	0.827228	0.80451	0.828026
cg02936593		AACTGGAGTCTTATCTCTCTCTGAGCCCCAGTCTCTACAGGTAGGTCTCTGGAACTACCC[CG]AAGGGGTAAGGCTGTCAAGCCCCCAAGGCATCAAACAGTTGTCAGCCTGGATCATTGCCT	0.412178	0.494356	0.43437	0.4633	0.397045	0.172077	0.303739	0.229502	0.230027	0.0809996	0.50124	0.458413	0.493533	0.478102	0.0873924	0.854833	0.824989	0.833317	0.818447	0.822681	0.809817	0.827	0.769556	0.829676
cg01510218		CCTGACCTGGCTTCCTTCTAGTCCCCTCTTCCTAGCTAAGCTCAGTCCCACTGAAAAGCT[CG]TGGCCCTGGACTCCTTTGGCTCTCACAAGCCTCCTCCAGTCCTGACTTGTCACCTGTCCT	0.557196	0.508674	0.578602	0.546581	0.512112	0.31128	0.336261	0.286062	0.117889	0.277581	0.560826	0.588003	0.550597	0.521555	0.447923	0.273692	0.296688	0.313101	0.32671	0.311357	0.299612	0.297023	0.273647	0.265948
cg11143092		CCCCGGCCCTTGGTGGGCTTTCTGTTCCTCATGAGAGCAGTGAAGTCTCATAGCTGTCCC[CG]ACCACCTGCCTGGCTGGGCCCAAAAGACATAGGGAAAGGTTTCTAGCTCTAGAACCAGTG	0.528738	0.49265	0.54879	0.530845	0.54988	0.124926	0.202045	0.346744	0.393938	0.262951	0.528015	0.575153	0.525881	0.516462	0.165066	0.825866	0.837691	0.834956	0.830871	0.812885	0.815735	0.819697	0.765474	0.830765
cg20998200	SLC17A6	TAAGATGAAGAATCTGATATTCTGTAACAGAGAACATGGTATTTATAACTTTTTCTGCCA[CG]CAGACACCTTGTCAGTTTGGGCTCTTAGAACTAAAATTGCAGAGATTTGAACATGACTGG	0.495802	0.413683	0.475476	0.43563	0.417437	0.204223	0.2794	0.133526	0.310655	0.121721	0.469058	0.508863	0.468933	0.450013	0.166907	0.867539	0.863394	0.814316	0.83263	0.851832	0.839795	0.82012	0.774721	0.854924
cg02965895	OR51L1	GTCCTCATTCCATTATTTGTACTCAAAAGAGATAACTTTGAGGGATCAGGAAGGAAAACA[CG]AACCATTCCTCACTACTTGCTGAATTACTCAAAGTCACTATGGGAGACTGGAATAACAGT	0.415729	0.41572	0.335643	0.396233	0.302016	0.109812	0.279494	0.0958974	0.154309	0.110801	0.446512	0.392812	0.392919	0.364674	0.180077	0.870483	0.845119	0.840176	0.855358	0.840624	0.831267	0.827302	0.794265	0.866606
cg23274984		TGATTTATATAGCAGAAGGGGTTTGGAAAGTACAAATCCACATGCTAATGAAATCATGGG[CG]TTGGAGAGAATCATTTGGAAATGTAGGAACCATAACACCTACCCAGCTTGTCCACTAATC	0.383904	0.450578	0.435329	0.37483	0.431209	0.131936	0.264178	0.230088	0.197683	0.141379	0.479489	0.430283	0.352152	0.408618	0.175712	0.810137	0.806076	0.797451	0.764907	0.807541	0.826129	0.756202	0.711813	0.780627
cg10632971	NKAIN3	CTCAGCTTATAAGACCTTCACACTGGGAGTCAATGGTAACTGAAAAACAACCCCCAACTT[CG]TTACATGAAAGCTGAGGCAAGTTGGTCTGGTGTGGCTACAAAATCTATGGTAAAACTTTT	0.345107	0.394722	0.429416	0.403096	0.335844	0.136284	0.209106	0.120402	0.240732	0.15707	0.445979	0.438061	0.440923	0.394769	0.189097	0.834939	0.809466	0.741471	0.839503	0.826933	0.800071	0.839241	0.745895	0.792984
cg06658391	IL1RN	ATTAAGCCAACACATATGTTTTGAATGAATGTGTGCACACATGCATGAGCTGGCGGCAGT[CG]GGGTTGGGGTAAGCACGAAGGCCCAGCTCAGTTCTCTGCATGTGACCTCCCATCTTACGC	0.44813	0.441898	0.433248	0.323117	0.368758	0.287124	0.167199	0.103665	0.169582	0.224848	0.398438	0.369986	0.280464	0.393724	0.15049	0.881754	0.875524	0.889866	0.895039	0.901099	0.869512	0.874466	0.829995	0.867536
cg00135293	GRIK2	TCCAACTCATTCATTTCCCAACATAGCAATTGTGCTCAAGTTCAAAGCATCCTAAAATAC[CG]CCAAAATATCAAAGATTGCTAACCTGGAGAATTATCTGGACCTACAGCAGACCTGGCTTT	0.580958	0.599798	0.606143	0.617672	0.619164	0.492976	0.386663	0.332236	0.330765	0.373349	0.626618	0.631825	0.636624	0.637521	0.322923	0.86194	0.83534	0.840579	0.832401	0.840285	0.8599	0.864097	0.809357	0.878092
cg01244520		TAAAAGGGAGAATCTTGCCCAAGCTAGTAATTACAGATATCCTATTTTACAGGATAACAA[CG]AATAGAAATTCTAAAGAAGGCTCTCATTCTTCTCTGGGCCCTTTAGATGGTTCTGTTTCC	0.464685	0.350209	0.403785	0.470068	0.38408	0.193708	0.151084	0.226516	0.26418	0.163633	0.302005	0.447744	0.491407	0.316797	0.218825	0.846176	0.829491	0.799799	0.851106	0.859792	0.802268	0.859826	0.829584	0.826161
cg07021447	ACTN1	CCTTCCAGCGCTGGTAGTCTAGACATCCTAGGGATTGACTCAACTTCTCAATCCTGGGAT[CG]CCAGAGGGAGGCCTGCTGGAGGCCAGCCCTGGGCAGCTTCTGACAGGCCCCAGCTTGGAC	0.405788	0.291305	0.39127	0.366621	0.282926	0.125954	0.122852	0.125728	0.0922483	0.0850217	0.314302	0.379265	0.348767	0.266937	0.0886269	0.847967	0.842115	0.823267	0.841239	0.863097	0.825483	0.825952	0.788349	0.824471
cg19259649		GCATCTGAGATATCTGGATCAGATCCTAGAGAAGGTGCAGAGGTTTTACGTGGATGGGCA[CG]GGACTGCTTTACGGCCAGGAAAATGGAAAAAGGAGGGATTGATGGAGAAAGGGGGAAGAG	0.46768	0.469615	0.540437	0.473285	0.53251	0.288629	0.28492	0.284963	0.188624	0.303426	0.497561	0.515698	0.482187	0.511495	0.539493	0.857984	0.864662	0.867277	0.853957	0.863123	0.825914	0.840935	0.796167	0.848983
cg22494876		CTCTTGGAACTTGCTACCTGCCTCTCTGCAGGCAGTTTCAACCCCTCACTCACCCTCACA[CG]AAGTCATCTTTCTGAGACTCAGGCCTTAAGGCAAAGATATCTTTAGGTGTTTCAATTACC	0.524656	0.427165	0.480982	0.481992	0.492751	0.15338	0.263952	0.208162	0.336634	0.205888	0.496517	0.476796	0.462106	0.522967	0.168091	0.826317	0.835887	0.787219	0.775491	0.826115	0.814133	0.851867	0.805212	0.789553
cg00043792		GAAATAATGCACTAAAAGAAAGTTTGCACTTTTAAAAGAGAGAACTTTTAGACCTAAAGG[CG]ATTTACTCTGTTTTCTTGCCTGAGAGGGTCACCACCCAGGCATAATCATAAATGCATGGA	0.428714	0.468415	0.467837	0.525111	0.459356	0.197039	0.237645	0.136684	0.273391	0.155599	0.514808	0.539595	0.557256	0.50158	0.173198	0.831917	0.814048	0.798315	0.784676	0.805689	0.823088	0.829364	0.788938	0.769586
cg23716866	CLIC5	TCTCTGTCTTCAAAGGGGCTTTTAAATGTAGCTGGAGGGCCCAGAAGAGAAAAATAAAAC[CG]AGGAAAAACTATTTAAAGTTTTCTTAGTGCAATAAGCCCAGGTCTGGATAAGCAATAAAA	0.492875	0.455547	0.524218	0.490711	0.462729	0.167833	0.2936	0.294662	0.376469	0.205249	0.478688	0.513115	0.471615	0.411279	0.136688	0.821897	0.83497	0.877121	0.836337	0.829031	0.812504	0.830701	0.769336	0.857403
cg03799230		ACCTTCCATTTTCCTATAAAGGAGGGAGTGTTGTGAGCATTTATTTCCCAGGAAATGGCA[CG]TAGATCTTTCTAATAGTTATGCTGAGAACATAGTTTTGGGGGTTTCCTTTGACATTTCAA	0.463705	0.493988	0.499539	0.47801	0.401981	0.268984	0.303049	0.178951	0.315151	0.250431	0.56923	0.505565	0.451058	0.456561	0.14627	0.848409	0.839232	0.846122	0.84721	0.829808	0.812467	0.837567	0.785626	0.837721
cg12234272	TFF2	CTGATGGTTGAGCAGTCAGGGGCCCAGAGACGCAGGAAACCCAAAATCCTTGGTCCACCA[CG]GGGCTGTCCTCAGGGTCTGGAGAGCAGGCCCCATACTCCAGGCCCCCATCCTCCAGGCCC	0.512042	0.532274	0.550131	0.534761	0.566919	0.22378	0.35989	0.342655	0.352859	0.304239	0.565662	0.581771	0.575037	0.574367	0.235112	0.814854	0.809589	0.830827	0.801521	0.804005	0.78163	0.797742	0.745071	0.797599
cg20719439	FHL5	AAAACATACAGTTAACTGGCTCTGCATTTCTCTAGCTCAAGTTCTTTGACTGTATATACC[CG]AGTTTGACCTTAGAAGATATTAACATTTCATTCCTTTAGCAGTTAGAACAAGGACAGTTT	0.439491	0.463629	0.5021	0.531254	0.482594	0.331312	0.346298	0.14641	0.260032	0.353124	0.576223	0.548359	0.535468	0.557459	0.490856	0.810857	0.83304	0.815288	0.80621	0.825156	0.820771	0.805408	0.780901	0.840646
cg08984900	CCL4	TTAATTTGTCCTGTTCTTTTGCTGGTCCAAGAAAATATCCTGAAATCTTTATTTCTTCTC[CG]TTTCCTCCTTGTCCTAGGACAGACTAGCCCTATCCCCTTCCTGAATTAAGTCCGAATATA	0.585771	0.569692	0.635705	0.601177	0.606853	0.400136	0.33123	0.312314	0.381463	0.414236	0.598539	0.652788	0.636675	0.644961	0.474127	0.858017	0.847026	0.866901	0.865828	0.860157	0.837801	0.847401	0.810864	0.851258
cg14479139	SLC10A2	CCTATGGCTGGTATCTGGAAATACTGGAACCGAGCGTTCTGATTATGTGAAGAAAGTGGT[CG]GTTTGGCTTGCTGGGGATTGGAGTAATATCTTAGAACAGAGCTTCTCAAAACTCAGTGTG	0.537521	0.545762	0.568918	0.536284	0.574843	0.332584	0.396146	0.349861	0.3309	0.162186	0.554132	0.578837	0.551222	0.588378	0.359435	0.731049	0.733272	0.732329	0.769017	0.708364	0.728188	0.714054	0.724933	0.707919
cg25890391		CACTCTGTTGATCTTTTCCTTTTCTTTCCTGCCTAGGCACAGCTAAAGTGCTCTCTGGTA[CG]ACAGTTGCCTCTGGGAGCTCCAACTCAGGTAAAGCACCAGGCTGGGAGGAACCACTGTTT	0.368309	0.356593	0.396943	0.390458	0.296003	0.176922	0.206859	0.108662	0.10942	0.126672	0.389447	0.394836	0.390833	0.334936	0.172755	0.768622	0.749739	0.784866	0.752547	0.767218	0.782692	0.782498	0.71635	0.807282
cg09798366		ATCTCACATAGAGCTTTCTGATAAATCATAGCTCTGCCAGCACATTCATTTCAGACTTCT[CG]CTTCCAGATCTGTGAGAGAATAAATTTCTGTCGTTTTAAGTCACCCAATTTGTAGTAATT	0.580329	0.593714	0.598826	0.642538	0.631156	0.348004	0.455299	0.364113	0.453941	0.406559	0.645827	0.606185	0.646304	0.60778	0.353254	0.874227	0.837753	0.855469	0.852637	0.866051	0.885765	0.885362	0.852133	0.839817
cg21930712	C19orf75	GCTCAACTTCAGGAGGAGCTGGATGCTAAGATCCACCATGAGGGAAGTCACCATGTTACA[CG]ATGGAGGCCCAATAAAAACACTGGACACAAGGCTTGGGTGAGCTTCTTTAGTTGACAGTA	0.492227	0.51686	0.544098	0.529445	0.576326	0.095049	0.166395	0.26648	0.35522	0.116473	0.536236	0.565089	0.524711	0.559936	0.215196	0.860657	0.859402	0.857693	0.839993	0.844199	0.848095	0.813393	0.797019	0.8477
cg08314781	EML6	CCCTCATCCTCCTCCTGGCTGGTTTCCCTTTTCCACCCAAAGCTCCACCTCTTGGAGAAC[CG]CCCAAAAAGGCTCAAGCAAATTTCCTCCTCCAGCAGAGGTAGAAATCTACATTCAGCCTG	0.479094	0.415605	0.409702	0.404737	0.377483	0.212301	0.200911	0.154871	0.0970627	0.272596	0.451656	0.423081	0.389181	0.442974	0.386433	0.711654	0.705139	0.750281	0.721422	0.719358	0.713448	0.730633	0.707312	0.734003
cg08448407		AATACTGATGGAACACTCATTATGTCCCTGGTACTGTTAGAGGTTCTGGGGATTCAAGAA[CG]AATAAAACATACAAAGATCCAGCAATCTAGTAGATTTTACAATCTAGTGGGAGGGGACTG	0.40116	0.383602	0.408307	0.505548	0.372991	0.110609	0.233311	0.166518	0.174589	0.153255	0.436874	0.417711	0.499687	0.39499	0.163686	0.868198	0.845033	0.813515	0.81368	0.860633	0.817207	0.837709	0.817194	0.846244
cg11977100	OR2AK2	GGTTCTATCAATGCTTTCATACATACATTGTATGTGTTTCAGCTTCCATTCTGTAGGTCT[CG]GCTCATTAACCACTTTTTCTGTGAAGTTCCAGCTCTACTATCATTGGTGTGTCAGGACAC	0.410046	0.436213	0.397867	0.449658	0.383013	0.174531	0.238694	0.1349	0.113019	0.105925	0.453706	0.421124	0.419771	0.433793	0.104986	0.773311	0.748957	0.802542	0.749554	0.768187	0.782947	0.665593	0.642684	0.639868
cg19793904	TMEM132C	GGGGCAGGGAGATTGATTGGTTGCTTTTGCCAGTTTCCATGGTGTACATATTCCCACCAT[CG]CCAGTTTCAAGCTACCAACATGAGGTAAACTGAATGTGGAGTCTGGAAGGGATACTCACA	0.496366	0.460683	0.541089	0.496943	0.473132	0.278906	0.361657	0.093226	0.184705	0.0947146	0.483741	0.535878	0.513252	0.491631	0.345206	0.837079	0.83309	0.789387	0.788727	0.83663	0.838759	0.802842	0.755118	0.813178
cg26843783		AAGGCAGGAGACTGTCTCTCCCTTTCTCTTTCAGAATAGCCCTGAAAATCAGTGCAACCT[CG]GACATCCATGGTTAAAAGTCAGACCCTGTTTTGGAAATGGCTGGGAAGGGCGGCTTTCTG	0.491578	0.478195	0.445215	0.426483	0.488931	0.108539	0.295033	0.182476	0.15645	0.244296	0.455091	0.473935	0.406215	0.447788	0.50442	0.759488	0.695041	0.6772	0.650007	0.712272	0.738619	0.749455	0.752914	0.816795
cg13583523		GCTCAGGGGTTTCTTTCTGTTTCCTCATGTGGAGCCTTTCCTGGCTCTCAATCAGTTCCT[CG]CTGGGCAAGCTGCCTCAAACCCTCTCCTCTCCTCTTTTTTTTTCTTTTTTTTTTTTGTCT	0.385518	0.410841	0.452948	0.46651	0.363598	0.0946812	0.23757	0.190607	0.203844	0.216534	0.441421	0.48269	0.497292	0.408213	0.10523	0.756812	0.751244	0.73934	0.749775	0.793922	0.731323	0.767321	0.746659	0.772775
cg22227965	LMO7	CCATGTCTTTTGTATACCATTTTATCCTCAGAGTCTAATACAGTTCTTGGCACATAGAAA[CG]GCCAGATATTTGGTAGGTGACTAAACTATACTGCAGTGTGTTGAGAAGTGAACAGAAGAT	0.416994	0.296682	0.335383	0.304746	0.245699	0.127156	0.117612	0.10151	0.127642	0.0933618	0.314647	0.390622	0.299826	0.280394	0.112173	0.826888	0.828366	0.831973	0.830784	0.847496	0.794508	0.840703	0.79297	0.827325
cg26993496		CCAGGGGAGGAGGAGCCACGTGGCTGCTGGAAGGCATCACAGCTCAGCAGCCCGGGAAGA[CG]CTCCTCGCTGCCCGCAGGCAGCTACAGGCATGAGGCTTTCCTCCGACCTCCTTCTTGCTC	0.446073	0.331044	0.362817	0.315984	0.322278	0.103083	0.122693	0.136339	0.150704	0.409722	0.370084	0.398518	0.309631	0.341768	0.278014	0.782376	0.777347	0.757294	0.778766	0.789946	0.790257	0.801061	0.759194	0.792081
cg21713614	FRAS1	AGTGTGATAAAACATCTCTCTGAAAGAGAAATGTTCTTTCAAATCTCTATGTGAATTACT[CG]AATCAGCAGCTCTACCCAATGTGTAATCTAGTTACTGCTGAACTATCAGGTTGGGAGTAG	0.290143	0.323591	0.393342	0.397841	0.394717	0.23719	0.151709	0.103393	0.101053	0.100329	0.35972	0.428401	0.416196	0.407878	0.0714846	0.81999	0.832927	0.80361	0.81978	0.814524	0.829282	0.843323	0.762873	0.792482
cg03545548	WDR49	CAAGTAATCAAGTACAGTCATGCATTTCATAACATTTCAGCCAACAATATACAGCATATA[CG]AATATGGTCCCATGAGACTATAATATGGTATTTTTACTGTACCTTTTATATGTTTAGATA	0.567422	0.557183	0.582277	0.55526	0.541652	0.293719	0.392488	0.315806	0.330869	0.191521	0.554694	0.594444	0.590406	0.571582	0.273823	0.798418	0.819014	0.826899	0.803762	0.824478	0.788434	0.845203	0.769615	0.834844
cg04260867	ZBTB8A	CCATTGATTTACTATTTTAGCAAATGTATAACCTGATATCTGTACTCTAAATATTAGAGA[CG]TAAATTTGTCAGAGGAAGCTTGGTGTACGATGAATGCTTGCATTGGAAAAGACGCAACTT	0.539515	0.472654	0.527071	0.508509	0.444918	0.229049	0.233434	0.234097	0.336463	0.530832	0.464912	0.541824	0.57636	0.389932	0.30202	0.83264	0.828393	0.81109	0.805038	0.833369	0.81858	0.831708	0.798207	0.84
cg11916478	IQSEC3	CGCCCATTTTAAAAAAAAAAGATTTTGTAGTCTGCATTTCCCACTTGGCGAGGCGTACTG[CG]CCCCCTTAGAGGCCTCCTACCCTAACCACTTCCTCCCGGGCCGCCCGCCCTGGTGGCCCA	0.374999	0.212271	0.293121	0.321847	0.388332	0.13962	0.056877	0.117056	0.082407	0.42113	0.198582	0.303409	0.344342	0.340369	0.450462	0.785513	0.713555	0.862209	0.894195	0.819477	0.789376	0.875106	0.842262	0.867527
cg05036991	GALNT13	TCTTTTAATGTATTGTGTGAAGTATGTAACATAATAGTTTGGGATGGGTAGACATAATAA[CG]AAGTTCTGGAGGTTAATTGATAAGCAACCAGTTTGTCTAGTTAGGCAATATATAATAGTC	0.546153	0.450583	0.49012	0.498427	0.503779	0.183502	0.253517	NA	0.258389	0.0754947	0.463042	0.517782	0.531585	0.489803	0.283327	0.867898	0.864787	0.862559	0.866696	0.824999	0.856805	0.856057	0.790061	0.859916
cg11898958		CCTTATTCTTTTGAATTTTCTGTCTCCTCAGCCTCTCAGATATCTTGGGCCCATCTAGAC[CG]CCCCCTCGTTTCCTCCCATCCCTTCATTTCCCTCCTGCTCAGCCTCTCATCACCTCCACC	0.448667	0.422354	0.433566	0.44047	0.402441	0.127366	0.324354	0.0973097	0.108878	0.42768	0.456937	0.441663	0.444255	0.3778	0.144827	0.562807	0.565559	0.638734	0.677198	0.623923	0.57072	0.592533	0.583306	0.607866
cg01680054		CCTGAATAGCTTTTTTCACATGGTCCCTGGTCCAAAGGGACAGCCTCACTGTGGCTCTGG[CG]ATGGCATGGCAGCCTGAAATTCTTTGACCTGCCTCAGGAAGCCATTTCTGTTTCCTGAAC	0.659008	0.645019	0.662699	0.680225	0.657376	0.368582	0.387367	0.366795	0.450331	0.28813	0.661429	0.690745	0.696337	0.639487	0.304063	0.849858	0.856969	0.572079	0.832904	0.859164	0.864402	0.845104	0.825662	0.880988
cg03408359	ANO4	GTAGGAATCAATAAAAATTGTATTAGATGTTCCCCTTATCTTTGGGGCTCTTGTCTTACT[CG]TACTTCCTTTGTGGTAACTTTAGGATTCTCATGTTTCTCTTCCTTGACGTTGCAAAATTT	0.382388	0.489311	0.452031	0.490523	0.499683	0.270618	0.220596	0.286497	0.244053	0.412791	0.522994	0.499594	0.519313	0.486164	0.213861	0.851091	0.841421	0.85002	0.882433	0.832564	0.870875	0.852535	0.823324	0.850772
cg03296565		GGCAGCACTCTGGTTCTGAGAAGTTTACAGCCCATTTCCAGAAAAGCCACGAATATTCCT[CG]CCTTGCTTTTAATATTCAACATTTTCTTTAGAGGCATTCTGTATTTTAATCCTCTCATTT	0.537575	0.511153	0.500897	0.569052	0.541218	0.318261	0.339904	0.227548	0.413887	0.158788	0.546347	0.555518	0.594572	0.540641	0.285676	0.861519	0.864846	0.846199	0.865081	0.844497	0.830634	0.842399	0.786734	0.863723
cg15328703	TMEM132B	CATTTTGGTAGCATTCTTGTTTCATTATTTTAGAAAGGGGTCTTCCCATTACTGGGATGT[CG]GGGCCCTGTCAGAGAACTATTATTAAGGCTCTGTGAGGGAACTGTTCAGTCTCACAGCAA	0.58372	0.521309	0.569952	0.567222	0.484612	0.265883	0.282998	0.254984	0.391431	0.172921	0.548195	0.554456	0.569496	0.54413	0.251972	0.88846	0.888201	0.872158	0.872438	0.874819	0.882283	0.875982	0.854364	0.880542
cg22293823		AGGGCTCCTCCGCCTGCACAGAAGACAACATAACCATATGACTTTAAAAAGCCACCAAAT[CG]CTCTGAACTAAAGCTTCATCATCTGCAAAACAGGGATAGTTTTGTATTTTATTAAATCTA	0.524821	0.461046	0.51492	0.492668	0.504498	0.194305	0.194302	0.413208	0.267174	0.101753	0.4936	0.530223	0.48995	0.499689	0.136283	0.804293	0.81691	0.805592	0.810461	0.80369	0.808868	0.797156	0.732438	0.794405
cg13666232		AGTGATGAGGCAGTGCTGCCCTTATTTTCCTTGCCTTACAGGAGAAGTGTCAAGAGAATC[CG]TCTAAAACAGCTCTTTAAATAAAATTCAGAATGTTCTAACATAATGCCCCAAATAAGCAG	0.492816	0.411342	0.468339	0.433877	0.484088	0.232883	0.296156	0.15457	0.250028	0.179529	0.436748	0.496687	0.458511	0.446009	0.34103	0.824146	0.822751	0.825128	0.809024	0.8332	0.803905	0.824407	0.755989	0.832605
cg16769791	RALYL	TGATGGTTCAGGCAGCTGATAACTCTGTGATTGGTTTGATAGTACCATCCTTTACCTAAT[CG]TTCCTGAATCTGTCACTCACCACCTTCTATACACAAACCTATAATTTTTTATCAAGATGA	0.646175	0.609827	0.670669	0.648457	0.646478	0.328892	0.481084	0.399848	0.247997	0.344729	0.627753	0.692363	0.677955	0.603745	0.364286	0.869758	0.870204	0.856752	0.84296	0.860905	0.839556	0.84879	0.831963	0.872427
cg00091960	GRM8	TCTCATTGCCCTGTACAGCAGGTCCAGTTTCTTTTTCGTTCTCCTGATAGAAGGACTGTA[CG]CCTAAATATTCAGCACATATCCCCAAATTGATGTTTTACCTAAATTGTTTCTTAATTGGC	0.567596	0.597113	0.574447	0.61659	0.568375	0.395673	0.402575	0.331426	0.373955	0.274184	0.585474	0.621015	0.617427	0.593245	0.368338	0.845094	0.871888	0.871997	0.871127	0.854292	0.863113	0.851888	0.801004	0.869855
cg01960096	ARHGEF11	TTATATGCATTTTAGGCCACATTCCACAACCAAAAGGAAATTATTATTAGCATGGATAAC[CG]AAGGTGGACTGGGCATGGAGGGAACAATTGCTCCCTTGCAAATATTCTTCCCTATCTCTC	0.430336	0.467537	0.402784	0.510345	0.462342	0.209608	0.19555	0.274144	0.266863	0.530252	0.422385	0.429673	0.528502	0.410921	0.711275	0.823159	0.854241	0.820531	0.801637	0.808723	0.800294	0.808064	0.762721	0.801476
cg01202639	NR1H4	TCCAGATTTGTCTGCTCAGAGGGCACTCTTAGGTAGTATCTCATACCATCTCAAGTTCAG[CG]TGGAAGATAAGCCTGTAAACAAAAGAAATGATTGTATGTGCTTCCAATAAGTGCCATAAT	0.589338	0.580197	0.622613	0.629988	0.604786	0.403569	0.282865	0.372612	0.393929	0.159235	0.623026	0.681087	0.658041	0.654638	0.26891	0.850697	0.86101	0.859714	0.842775	0.845961	0.829102	0.857328	0.802473	0.845804
cg05658811	SCGB1D4	CTGTGTAGTCATGGAGGCCAGGGCTATTTGTACCTAGGGAGCCTGGCTGGTCCTACCTAC[CG]GGGCACCTGGTAGGTCATGAGGCCTGGCTCCCAGCCCGCCCTTCCAAGCCAGGGCTGCTG	0.42747	0.352731	0.36241	0.448067	0.445247	0.118998	0.168061	0.289436	0.09251	0.364275	0.382527	0.381493	0.452109	0.414683	0.379435	0.791462	0.789818	0.792863	0.779902	0.797667	0.763567	0.783251	0.75044	0.791535
cg05429895	TLR4	ACTTCCTCTCACCCTTTAGCCCAGAACTGCTTTGAATACACCAATTGCTGTGGGGCGGCT[CG]AGGAAGAGAAGACACCAGTGCCTCAGAAACTGCTCGGTCAGACGGTGATAGCGAGCCACG	0.244682	0.278962	0.336292	0.32811	0.350239	0.137247	0.0808187	0.0935195	0.0859039	0.378597	0.270848	0.338311	0.32561	0.258837	0.116273	0.79036	0.786841	0.791702	0.797675	0.776865	0.740661	0.766534	0.673836	0.727221
cg24996280	TSNARE1	AACAAACCCAGTAGCCACAGAAACGCCCGTGTGCATTAAAACAAAAAGCCTGGAGCCAGA[CG]CCATGACTCACGCTGGGAATCCCAGCACTCCGGGAGGCTGAGGCCAGAGGATGGCTTAAG	0.389364	0.379394	0.38842	0.44429	0.366841	0.156596	0.240336	0.244101	0.129218	0.125297	0.356831	0.390785	0.443704	0.333288	0.133231	0.728064	0.743136	0.751292	0.724454	0.737273	0.740047	0.754731	0.675518	0.757889
cg14576436	KCNE4	TGTGGTGTCGGGCCTGAGGTCGGTGCAGGTGCCCCTGATGCTGAACATGCTGCAGGAGAG[CG]TGGCGCCCGCGCTGTCCTGCACCCTCTGTTCCATGGAAGGGGACAGCGTGAGCTCCGAGT	0.385359	0.389713	0.34798	0.486942	0.465372	0.257333	0.107929	0.272317	0.162682	0.55919	0.389884	0.380108	0.467891	0.455192	0.723284	0.878893	0.880912	0.865888	0.883825	0.883902	0.857268	0.864451	0.846079	0.885118
cg23924370		AGTTGTCTCTTATCCTCCAGGGAACCAGAAATAGGCAGGTCGACCAGGCGTCGGCCCCTC[CG]CCTCCGCCTGGCCCTGTGCTCCCCGGGGCCCAGCGCCCCGAACACAACCCCAGGGACTCA	0.439943	0.479498	0.522104	0.500178	0.554677	0.119175	0.156433	0.240547	0.151981	0.701555	0.447132	0.519158	0.478396	0.509546	0.741147	0.806132	0.777207	0.803752	0.831467	0.823597	0.82546	0.847547	0.825503	0.825922
cg10216717	TMEM132C	ATAATCCTGTCTTTGTCTTTTTCTTTTCTTTCTTTTTCCCTTTTTAGTGATAGAGGGTCA[CG]GGGTCACAGACAACATACAGAGATTCTCCTCACTGCCACCTTACCTACCTGTGAGCTACC	0.58281	0.530498	0.570076	0.518065	0.551174	0.204514	0.373096	0.185831	0.371383	0.396208	0.562906	0.57665	0.52043	0.5757	0.268542	0.843567	0.857589	0.842061	0.859438	0.858031	0.840072	0.850951	0.789184	0.850573
cg18448977		CTTCCTGGCTTGGGGCTAACTTGCTATGGTTTATTGACATTTTTTCAGCTCTCTGAGCCT[CG]GTTTCTTTATCTAGAAAAGTAGACGGCTGGACTTGATGAGTTTTAATTTGCCTTTCAGGT	0.419481	0.324804	0.308087	0.433269	0.303676	0.145442	0.112241	0.156747	0.0964952	0.255739	0.317539	0.341736	0.445201	0.384371	0.483672	0.861961	0.869401	0.860548	0.852635	0.864182	0.855647	0.853678	0.819272	0.872763
cg17183752	MEGF6	CCCTGCCTAGACTGGAGGCCTCGTGGTGTGGGGAGGTCCAAAAGCCTTGGCCAGGCCCCC[CG]CTGACCCTGACTCACTGCTCCCTCTCTGACGTTCCGGGCTCCCAGGCAGCCCCCCAGACA	0.543277	0.553812	0.587554	0.609096	0.578304	0.369338	0.366269	0.345458	0.376896	0.322336	0.575885	0.620511	0.618207	0.586255	0.421518	0.80894	0.83642	0.798047	0.806894	0.855403	0.817599	0.815842	0.792087	0.841023
cg16109680	CADM3	TAGTCACAACTGCTTCTCCTGTTCTTGTTCTTATATGTAGGTGGTGGCAGGAAGGCCAAA[CG]TAGAACAACAGATATGTCTGTGTGTTTTCAGAGGTAAATGGTAGAACCATATCAGAAAAG	0.398583	0.303501	0.331489	0.293443	0.366904	0.110794	0.142133	0.104052	0.127018	0.0927282	0.315959	0.376119	0.304811	0.353669	0.18413	0.738683	0.75171	0.745082	0.690736	0.741178	0.71178	0.731487	0.674984	0.739936
cg20449074		AACTAGGTGACTGATAACACTTAAAACAGTGTTCACTGTTGGAGAGGTCTAAAATTCACA[CG]AAATTAGGGTGAACTGCTCTAGCCTGCTTGAGGCATAAGGGATCCTTAAGCCTGCCTGGG	0.292396	0.310399	0.34306	0.346409	0.324943	0.0706452	0.0987337	0.0587954	0.120383	0.0919721	0.366562	0.32421	0.292207	0.280032	0.119237	0.661244	0.679881	0.58441	0.629661	0.665142	0.666893	0.554262	0.51855	0.519828
cg00340127		GTATGGGGGTCACTTTTCTGGCTGCCACAGAAGGACAGTGTGGCCCCATGGAGTCACCAC[CG]CTGCCCAGACTCCCCTGATTAGGGGCTTGCTGTGTCTGGTAGGCATCTGCTGCTGCTGCT	0.495413	0.452967	0.537236	0.505724	0.412121	0.249494	0.200539	0.326014	0.324751	0.157953	0.476823	0.485786	0.492096	0.470669	0.289625	0.865104	0.818532	0.815452	0.831632	0.84795	0.834327	0.852107	0.843621	0.838677
cg24000437	LCE3E	GAGGGAAGCTGATGTGGAGCTGGTGGGATATGCCAGATACTTCTCACATTGCTCTCCACC[CG]GGACAGATTGCTGTGAGTCTAAGTGGGCACGTGTGTTTCTGTTTCTCCAAAGAACCCCTA	0.453356	0.460723	0.469357	0.479829	0.489665	0.108149	0.265976	0.364526	0.218978	0.220077	0.469208	0.457747	0.497489	0.476914	0.429645	0.76902	0.778002	0.81747	0.759186	0.755542	0.747296	0.69449	0.667871	0.741907
cg22228134	GZMH	GGAGAGGTCTAGGGAGAGGCTAACACCCATTAAACCTTTTAGGGAACACCCTTCATTTTT[CG]ATCTTTGCTGAGTGTCTATCTAGCCTCAGATTTATAAGTCTGGGTGTGGAATGGGAGGTG	0.519493	0.447931	0.48313	0.436913	0.499951	0.272502	0.269502	0.256651	0.28116	0.412008	0.476041	0.516287	0.450633	0.513544	0.437126	0.72475	0.731878	0.727549	0.709031	0.750819	0.719973	0.772726	0.745613	0.797655
cg24042923		TTTCTGTTTGAACCCACTGACACCTGAATCTTTAATCTTGTGGTTCTGCATTCTGATTTC[CG]AAACCTGCCTCAACCCTCTTCATCTGAAGCTTCATTTGAATCCTCTTCTCTGACTCTGAC	0.484106	0.447058	0.450534	0.457134	0.430782	0.213711	0.240547	0.177743	0.251253	0.616763	0.483581	0.478675	0.487735	0.499541	0.271236	0.700181	0.718584	0.737254	0.726975	0.706454	0.691726	0.66922	0.680626	0.735806
cg18986967		TTAACTGTTAACCAAGGCACATGGTCAATGCCTTAGTATTTTTTTTTTTAATTCTCCTAA[CG]TTATTTCTAGCTGTACATTCCCAAAAGGAATGGGTGGAAGCAAATCAGATTCTGAAAGGT	0.332641	0.411253	0.437258	0.421688	0.337033	0.150517	0.151766	0.115196	0.192549	0.0816348	0.426329	0.488928	0.428113	0.425287	0.0905622	0.794789	0.814941	0.829001	0.826296	0.813274	0.798481	0.795084	0.747946	0.794297
cg03190130		GGGCCCCCAGCAGGGGAGGGGCCTCAAGACCACGCGGAACCCCTGGGTGGGTCCCCAGCT[CG]CTTCAGAGGCTCAGAGCAGGGTCAGGGACCTGGCTCCCCGGGGCCGGAGCTGCCTCTACC	0.643369	0.624072	0.68038	0.640183	0.646101	0.406861	0.464701	0.474579	0.323597	0.394231	0.647703	0.668929	0.672689	0.632103	0.468241	0.836693	0.859487	0.856562	0.8793	0.858196	0.845547	0.84509	0.818976	0.858278
cg08238568	RGS7	GCTACACAATGCACATTTGCAAGACAGTGGTCAAAGAAATTAGCCAGGATCCTTTCATCT[CG]ATCCCTGGAGTTGGTGGAATGCAATGGAAGACAGAGGACTGGATCTGACTATGGTTCTGA	0.488958	0.419993	0.484005	0.364041	0.408864	0.162476	0.271724	0.246666	0.225458	0.13823	0.470618	0.491755	0.370702	0.48377	0.182232	0.838595	0.85338	0.816507	0.825426	0.816099	0.815995	0.814751	0.852588	0.855431
cg14965368	ST18	ACATTTCTAGAAACAACCTTATGCGCCTCAGCCAGCTGGGCAGCACATATCAAATTTCAG[CG]TGCACACAAACCTCCCAGGGGCCTGCAAGAAGCACTCTGATGCAGGAGATCTGGGGTGGT	0.343615	0.322669	0.345282	0.289139	0.41701	0.11403	0.145686	0.145479	0.126578	0.10879	0.340647	0.337336	0.288623	0.335907	0.163682	0.794247	0.773289	0.782247	0.778272	0.762331	0.74722	0.700162	0.771078	0.767295
cg02994463	PCDH17	AGCAGTTTGTTCAAAGGTAAGGCCTATTAAATAACTTTTCTCAGCTTCCCCATTTGCATT[CG]TGTCAAAATTGCTTTGCAAGAGACTACACTTCAGATTCAAACTAGTAGAGACAACACTTT	0.398828	0.422031	0.479118	0.500222	0.414743	0.192347	0.26922	0.164279	0.23648	NA	0.494943	0.475162	0.522636	0.448854	0.11421	0.808647	0.778944	0.796707	0.818426	0.772576	0.777583	0.807477	0.764398	0.79293
cg27169073		TCAAAGATTACATTAAAAATGCCCTAATTCAGAGAACACATCAGTAGGAGCAGAAGACCA[CG]TTGCTCAGGCATACCTACACTTGAAGGGCACACCTGAGCTTTGGGCTTACATCCCAGAGG	0.429634	0.482895	0.507064	0.479227	0.443571	0.161954	0.216708	0.149881	0.21288	0.115352	0.528794	0.479219	0.474935	0.527676	0.156732	0.755341	0.744905	0.72708	0.776933	0.766717	0.72242	0.742337	0.704295	0.740278
cg15650161	PCDH21	TGAGGCCACTGCCAGGTACAACTTCTATGTGAAGGCAGAGGACATGGAAGGCAAGTACAG[CG]TAGCTGAGGTGTTTATCACACTGCTGGATGTCAATGACCACCCCCCTCAGTTTGGAAAGA	0.546609	0.470203	0.473065	0.486839	0.433756	0.17909	0.304764	0.142521	0.36532	0.172511	0.491196	0.477279	0.496322	0.483606	0.225191	0.811761	0.815103	0.841722	0.836699	0.843037	0.803192	0.815881	0.779407	0.805605
cg20248654		GAAAAGTGAATGCAAATTAAGGTTTATGGAACTCCCCTCCCACTGGGACCACCTATGCCA[CG]ACAGCAGCATGTCTTCTACAGACCTACAGAATCTCTAAGTCTCCCCAGTGTTCTAAATCT	0.527601	0.496854	0.559516	0.589526	0.538619	0.164731	0.423649	0.293426	0.325836	0.251617	0.501072	0.543054	0.570227	0.534083	0.491146	0.785511	0.814363	0.762325	0.789613	0.797866	0.810909	0.81749	0.801339	0.840132
cg12036303	KIAA1949	TCTGCTCTGCTGCCTCCACTCCTGCGGAACTGTTGCCTTGGGCCTCCCTTGTCAGGGTCT[CG]GACAGCTCTGCAGTCTCTTTTGGAGCTACCCCTGGAACTGGCCACTCTTCTTTTCTCCCA	0.438211	0.395334	0.321879	0.344792	0.336756	0.120776	0.238045	0.146264	0.137004	0.221046	0.402118	0.400053	0.356839	0.389473	0.498402	0.838675	0.801004	0.80412	0.797719	0.824237	0.80804	0.833353	0.74251	0.791579
cg05819416		CTGAGAATGAAGTTATCCATGGTCTTCAAATCAAGGAGGCTGGGGCACAGTCAGAATCAG[CG]AACAAGACAAGAACACTGGACCAAAACATAAGGAACAGTAGCTAATGTGCAATAAGGGAT	0.653065	0.609336	0.693979	0.631308	0.636129	0.33234	0.399131	0.224025	0.263559	0.228006	0.661803	0.706082	0.623894	0.693141	0.393353	0.897987	0.897831	0.893969	0.890712	0.892945	0.859686	0.88677	0.877184	0.884053
cg04521583	SERF2	CAGCACATTAGACTGTGTTTGACCACTTCTTCCAGTTCATAGTATTGACTTCAGCCCAAA[CG]GAGATAACTCCCTGTGTGTCCTTGAGGTATTGAGCTGGGCTGGACAGCTCCCCTTGAGCC	0.480165	0.468089	0.467708	0.509353	0.414012	0.242953	0.29755	0.268478	0.179563	0.547045	0.430216	0.445813	0.461506	0.394582	0.60494	0.745501	0.734541	0.759077	0.726675	0.730484	0.738866	0.734418	0.718027	0.733119
cg15858166	RIMBP2	GAGGCCCTGCTTGTGGAGCTCCTCGGAGCAGCTCCTCAGCTCCCCCAGGCTGAGGAACCC[CG]ACCACCCCCCACCTGCGTCAGAAGCTGCAGTTCAGGAAGCAGAGGCAGGTCAGAGCAGGC	0.547422	0.451112	0.500667	0.519579	0.474635	0.171473	0.307874	0.357189	0.307454	0.0801174	0.465751	0.52036	0.530639	0.527174	0.248718	0.868358	0.851538	0.82112	0.855027	0.826452	0.847052	0.839892	0.790165	0.860323
cg06672160		TTAGGCTGGTGGTTTCTTTCCTTTCCTTTCACTGTTCACAGGTAGCATTCCATTGCCCCA[CG]ACTTCCATAATTTCTGTGGAAAGTCACTCATGTGTCCAGTTTTCTTTCTCCTTTGAAAGT	0.495555	0.429397	0.445379	0.481797	0.386424	0.202642	0.168679	0.175501	0.346224	0.201431	0.463665	0.492449	0.476996	0.433072	0.131089	0.822586	0.789338	0.792676	0.787086	0.805592	0.803605	0.785274	0.757408	0.792631
cg12416080	LRRC3B	CTTCATATGTTCACAGTTCTCTCCCCCAGCACCTGGGATTTGAACAGGAGACTCCCATTT[CG]CAGATAACTCCCAGTGGCATTGATGGAAATTACCTGCATAACTAACCCCCCTGCTCAAGC	0.512178	0.483987	0.540185	0.530627	0.433163	0.251518	0.28032	0.173884	0.159421	0.113054	0.526859	0.561633	0.513241	0.477585	0.120486	0.887618	0.868694	0.882855	0.871609	0.870662	0.852252	0.867166	0.815993	0.873968
cg05245416	LOC150568	TACACAATAGCCTTTGTCTCTTTCAAAGCTGGATAACACAAGAGCTCTGCACATCTGTAT[CG]AAGGTACCCGTGGTTCTGCACCTAAAGCTCTCACTCCTGCTCCATATGGTTTGCTCTAAT	0.686485	0.693068	0.72191	0.727705	0.714506	0.437522	0.504408	0.579712	0.294664	0.21743	0.705313	0.741963	0.72363	0.693398	0.416646	0.883506	0.881082	0.894837	0.895704	0.908932	0.880665	0.864823	0.856321	0.882097
cg10812027		GTGAATGTGTATGGAAAATAAAGAGTCTGGAACCGCATGGGAGACTCAGGAGCCAGAGCC[CG]GGGTGGATTCCATCCCTGAACCTGCAGCCCTGGAGAGGCCTGGGCTCAGCTGCACCCCTC	0.406511	0.524675	0.406512	0.419685	0.462839	0.153829	0.251723	0.256952	0.185701	0.484023	0.499679	0.39348	0.413576	0.431216	0.415401	0.877614	0.841193	0.866522	0.858577	0.857354	0.832626	0.82885	0.800163	0.829329
cg00887508		AAATGAAAGGGCTACCGGCAGACACCTTTGCTCCCCAAATCAGGTAGAAGAGACCTCCTA[CG]ACTATTGGGGTGCTTCCAGCATTGAGGACTCCTGCTTGGCAAGGTAGAGTAAAAAATGTG	0.55575	0.526981	0.581573	0.5004	0.520929	0.221445	0.184625	0.387071	0.170831	0.0834489	0.567066	0.584853	0.532405	0.568909	0.128155	0.827718	0.816813	0.747155	0.81503	0.807939	0.788856	0.801856	0.77182	0.813478
cg04733856		TGTACAAAAGTCCAAAATGGCAAAATGAAGGTGTGTGGTCTCTGCCTACAAATTAAAATA[CG]TGGGTTTTAACATGTTCATTTTGTAATAACCTCGCTGGACACTGCTTATTGAGTTAAATT	0.562924	0.522037	0.587243	0.564743	0.521071	0.209843	0.186759	0.193286	0.332174	0.130323	0.597799	0.570517	0.588047	0.577792	0.178111	0.860639	0.828928	0.829717	0.842334	0.810517	0.830846	0.831482	0.779837	0.830381
cg13866093	GPX5	GATTCCTCACCTTCAGAACGAGCCCTGCCACTGTCTCCAATAAAATGTTTTCTGCAGCAT[CG]ACAATCTCTATGGTGGTTTTAAAATCCTGTCTGGTGCTTGAACTCATTTTATCTCCCTCC	0.320376	0.410273	0.362303	0.330245	0.442661	0.116514	0.120727	0.169077	0.137473	0.151927	0.382064	0.386659	0.313969	0.434137	0.23309	0.793475	0.771677	0.781721	0.767019	0.752933	0.778802	0.778515	0.741264	0.76214
cg10583322	MEGF11	CAAACTAGGATTCAAAAGATCTGTTCAGGGCCCAGCTCTTAAGTAGAATTAATACCTGAA[CG]AAAACCCCCTTTCAGCAGGGTCTTCTCAATACTTTATTGTAATAGTTTATCAGGAACAGT	0.467906	0.481662	0.493591	0.530698	0.416924	0.272677	0.280142	0.143657	0.246805	0.154539	0.513256	0.610177	0.51812	0.479189	0.245279	0.755442	0.798743	0.801107	0.796546	0.808967	0.807391	0.82096	0.775566	0.800253
cg27110491	UPP1	AGCTCTGCCTATTCATGAAGCTTCATCCCTACACTGTCCTTCATTTGGCCCCTGGTGAAC[CG]GGGGCCAAGGTGTGATACCTCTTTTAAAACTCATTCCCTTCACACTGGTGTTGTGACTCA	0.484408	0.451523	0.464443	0.540661	0.505715	0.138639	0.40668	0.185926	0.163268	0.371722	0.444685	0.457283	0.550439	0.459244	0.629672	0.79462	0.779157	0.809409	0.775245	0.801611	0.786563	0.789862	0.745634	0.782132
cg23224042		AGCTGTAGGATATTTTGAACCAGGAGGGTTTCAGAATTCCTCTTCAAGGCCATCTGGGTA[CG]TGGACTGCAAAGCACCTGGCAGCTCCCTGTGCCCACGAAGTTACTGTGCTCCATGTTGTG	0.488501	0.453828	0.460043	0.482727	0.460222	0.252637	0.231902	0.188609	0.380736	0.312832	0.490177	0.5081	0.497554	0.482593	0.200955	0.630163	0.634981	0.638836	0.645551	0.665688	0.629323	0.642387	0.609525	0.616444
cg01465527	SNORD32B	GAATACTTCCAAGGGATCCCAGCTGATGCAACATGGAATATAAGGAAACCCAGCCAATTT[CG]TTCCAAATTCTTGGCCCACAACATGTGAGATACAATAAGGTTTGTGTTCATTTAAGCCAT	0.412785	0.319953	0.403884	0.434841	0.361263	0.175843	0.209427	0.098404	0.149066	0.133574	0.320995	0.438067	0.46276	0.334373	0.286519	0.772694	0.775817	0.770728	0.739638	0.787976	0.741315	0.806296	0.728062	0.773707
cg09277575	AKR1D1	CTAACAAGTTTCAATTTCAGGACTACTGTTTGAGCTACTGAGAAAGTAAAATCTCTTTTT[CG]TTGTTTGAGCTGGAAACCTTGTCACTCCAAGGACAGTCAGTAAACACTTTTCAATGTTAA	0.552788	0.49763	0.472049	0.545098	0.47832	0.248217	0.30847	0.226093	0.317197	0.198515	0.521612	0.51214	0.561235	0.58536	0.195848	0.851411	0.816455	0.810179	0.829484	0.822371	0.807769	0.836538	0.783714	0.832839
cg26508164		AGATTAGTCACACAGTATAAGAAAGAAGCATTAAAAATGGCCAGAAAAATTCCCAAGTCA[CG]AGATTGAGGCAAGGAGTTTCTAAATAAGGTCAGTAACTGCATACTGGGGAAGTGGGATAA	0.42198	0.392705	0.425471	0.382181	0.295036	0.122895	0.223534	0.188678	0.182855	0.153817	0.37747	0.399024	0.283653	0.323491	0.124975	0.815289	0.84136	0.838542	0.861644	0.823765	0.818542	0.825734	0.761307	0.83423
cg17514199	LOC100130331	CTGTCAGTTAGAAGTTATCTGGCACTAGCAATTATCTGGCACATAGCCTTCAAGTCTGAG[CG]TTATTGACTTTATATCTGGATTCTGGGAGAATGGACAGTGGGAGTTGTAGAAGTCTGTTA	0.539097	0.531419	0.535279	0.605198	0.563104	0.205844	0.423428	0.33629	0.301655	0.181562	0.530469	0.562874	0.60908	0.524931	0.31121	0.850395	0.85893	0.884996	0.861103	0.843697	0.839493	0.849719	0.798693	0.865783
cg20015986		AGAAAACCTTTTTATAATAATGCTAAGACATTATTTGCCTTTCACTCATATTCTTTAACA[CG]TGTTCAGTGGAGTTTTCCAGAAGGTATATGATATGTGATGGCATCATTGCTCTGATGGCA	0.49261	0.48627	0.545814	0.513491	0.475571	0.250679	0.344322	0.258063	0.323224	0.20122	0.504729	0.520691	0.522071	0.494471	0.106206	0.766342	0.771365	0.687729	0.770121	0.752945	0.742317	0.793121	0.73455	0.803029
cg13137032		GAGAAAGGAGTGGGGGCCCTGCAGTCCACTGAGTGGGGTGCCTCTCAGTGGGGGAGGGAG[CG]AGCTGGCTTCATTCACCTCTGACTGTGGCCAGGAAGATGGAAGCCCGATGCTGTCAGATA	0.535529	0.546657	0.583574	0.603129	0.528311	0.189811	0.369519	0.269666	0.320835	0.204237	0.551492	0.5896	0.648631	0.552612	0.327096	0.848367	0.848484	0.836252	0.830594	0.820064	0.832056	0.810675	0.803002	0.846737
cg26697255	TMEM132D	CATGCTTTGCATGTTGATGGAACTGAACGGCCCTGGCTGGTGCAGTTCCGCCTTCCTCAG[CG]AGGGAGGGATTCCAGGGCAGATGTAAATGGGAACTTAAGGCCATTCATCAATTCATTCAG	0.343871	0.403268	0.351936	0.371185	0.323051	0.118136	0.17897	0.0977782	0.140415	0.111319	0.34753	0.376051	0.382548	0.377652	0.15495	0.702236	0.711573	0.629469	0.714969	0.644536	0.657905	0.734299	0.650674	0.653207
cg05543593		CAGACATCTTTTGCCTTGGTAGTTCTGGCTTCTGCTGAATGTTTTCTCCCTCCAGGCACT[CG]CTTTGTTGTTCTGTAGGCACACAGTTTCAAGCCTGGGATGGCTTGGAGTGTTACAGATGC	0.441367	0.372061	0.403667	0.446966	0.334974	0.0986013	0.158073	0.0807799	0.114723	0.0944136	0.412858	0.408548	0.47543	0.333044	0.108903	0.755984	0.737323	0.764964	0.760303	0.761649	0.744273	0.74885	0.728155	0.736331
cg20316883		AAGCAACCAAATATTATGCAGGCATTCAGACACTTGATTCTAAGGTTTGGAAAGATGGAA[CG]GGGAGACTTGTGAATTGTCAGTACATAGATGCCCAATATGCCATGGGAGCATATGATACC	0.565098	0.573127	0.567793	0.53382	0.642606	0.357419	0.33207	0.354902	0.39479	0.35316	0.597346	0.600793	0.531725	0.596419	0.381444	0.888064	0.870956	0.81755	0.877252	0.894508	0.868252	0.876749	0.854732	0.887659
cg24724832	C1orf187	TAGTTCACTGTGCGGTGCATTCTGTGGGTTTTGACAAATGCATGCCATGTCCCACCATTA[CG]TGTCACACAGAATATGTTCACCGCCCCGACCGCCCTGAGTCTTCTCTGTTCTCCTTCCGT	0.49068	0.426486	0.439959	0.35604	0.351052	0.149906	0.181869	0.203723	0.268895	0.401473	0.387191	0.450188	0.34041	0.341097	0.473586	0.830403	0.838957	0.860677	0.825198	0.860465	0.839741	0.838536	0.818206	0.842418
cg16316058		TTTACTGTCAAATAGTCAATTCCACAGGTGAGTTTTGCCAGTTTCTCCTAGACACTAGCA[CG]TTGAAATTGATTTGAATTGTTCTTTTTAATAGGAAAGTAATTGAAGCAGTAATTAATGTA	0.482296	0.414816	0.465734	0.424873	0.40357	0.230525	0.309826	0.214268	0.180607	0.254928	0.441788	0.512138	0.427594	0.437519	0.198997	0.798121	0.778645	0.491916	0.766459	0.803907	0.772274	0.800632	0.717851	0.794551
cg13867370	PIP5K1B	ATAGCAGAGACCAGTAGCTTCTGTGACATTTTCTGATTAGTCAGATCAGAACTTGTAATT[CG]TTTGGTGTCAGCCTAGCCACGAATGAGAGAACTTTCCTGTCATTCTGCACCTCTTTGAAG	0.536507	0.501605	0.526767	0.535842	0.520106	0.140812	0.377281	0.335242	0.268927	0.135832	0.516239	0.563289	0.555621	0.52632	0.249901	0.776671	0.773182	0.753694	0.74132	0.768077	0.749259	0.776486	0.719796	0.805447
cg19548435		CCCATAAAGAAAACTCCTATTCCCTCAAGTGTAATCAATCTGACTGCTTTTGTCCCAAAT[CG]TACTTAAGTATGAATGAATGAATAGACCTGTAATCCACCCAGAGATTATTGTTCTTATAT	0.45995	0.365723	0.467973	0.386892	0.396054	0.112419	0.190079	0.137105	0.0768496	0.0996993	0.358216	0.437257	0.400587	0.43998	0.0856486	0.791512	0.792387	0.830219	0.779028	0.79938	0.772231	0.773922	0.733603	0.787915
cg16050028		TCTGAGGCTCATCTCTAGGCCTCGACTTCCCTACTGCTAAAATGGGGCTGGGCTATAGCC[CG]TGTCCAAAGCCTTTCCCAGCCCAGCAGCTTCTGGTCCCAGGAGGCCAGCTTACTGTCGGG	0.617186	0.541338	0.581784	0.574631	0.547743	0.323151	0.387223	0.26976	0.352867	0.19657	0.571643	0.609936	0.621289	0.594861	0.370244	0.822773	0.816186	0.841194	0.797569	0.818701	0.805365	0.823014	0.788472	0.82465
cg01006048	GPR158	CTGTCTAGCATTTATTATGATTAGAGGTGAAGATGAACAAGGGAATTCTATCCATGAACC[CG]TAGCAGAAAAAGAGACTGACTTAAACATTACTCCAGGAGGTGTGATAGCACATTACAGTG	0.620664	0.578871	0.646751	0.611455	0.615473	0.419947	0.346625	0.387046	0.415884	0.302462	0.627102	0.672166	0.62956	0.659368	0.30645	0.838403	0.826629	0.829465	0.84242	0.863603	0.843991	0.85529	0.804691	0.841535
cg18187729	HHLA1	CCTGTGTTCCAAAGGGACAAGACACATGCCAGGCCCATGCACAGCTTCATTGAAGGACCA[CG]TGACAGGAAGCCCAGCATGCTTGTGATACTCTGGCCCACCTGGAATGAAGCAAGCAAACA	0.473868	0.369627	0.437836	0.453375	0.375403	0.171027	0.142785	0.215569	0.140443	0.129814	0.427356	0.450791	0.474066	0.412132	0.339614	0.760928	0.780797	0.772303	0.783254	0.788738	0.761002	0.7757	0.744277	0.791252
cg15659052	ELMO1	TGCTGTGATGTCATAGCCTGCCCAGGCTCTGCCAGGAAATGCCCATGAGGGCTGGGACCA[CG]TCCTTCATTCAACAAACTCGTGCAGAAGGGAGACAGAGATGGGAGCAAATCTCTCCCGGG	0.577233	0.511156	0.572506	0.585317	0.555017	0.224152	0.199327	0.205077	0.348978	0.106537	0.549523	0.567005	0.563653	0.575332	0.231693	0.785509	0.782574	0.804252	0.801878	0.781742	0.799595	0.77651	0.776747	0.803082
cg06699848	ST5	TAACACGTCTGATTCATGAGGTTGTAAGTTCTCCTGCAGAACAAGAAGATAGAAAACTAC[CG]CTTTTATCCCCACGGAGTCATCTCTGGGGAATAAAGAACGCTCACAGAAAGAAGAGACAG	0.859789	0.850142	0.771777	0.879779	0.857853	0.64516	0.649288	0.523934	0.698027	0.843638	0.7433	0.7206	0.748095	0.822124	0.722152	0.462154	NA	0.350603	0.471691	0.454389	0.474475	0.366076	0.327423	0.467449
cg22709144	GPX6	AGTTCTTACCAGGATACTGAGCTGCCAAGCCTCAATAGGCGGCCACATTGACAAACAGGA[CG]TGCTTGCCTGCAAACTGCTTGAATTGGATGTACTCCTCGCCGTTGAGGGTGAGGGCTCCA	0.58579	0.486779	0.517098	0.520893	0.522565	0.226708	0.241451	0.163157	0.319078	0.202443	0.514323	0.499864	0.572031	0.486913	0.374529	0.833845	0.826611	0.847484	0.833417	0.837962	0.815563	0.822346	0.781111	0.828874
cg11388802	CACNA1E	GGAGACCCCAGGGCACAGAGAAGCCCCAAGCCTGGCATTTCTGAGCAGGATTGCTTTGCT[CG]ATGCCACCTTCTCCCTCTCCTCTATTCTAGTCATGTGCCAGGGCTTTGTGACCCGTGCTT	0.575394	0.600662	0.637074	0.578975	0.645578	0.312315	0.348867	0.257482	0.461574	0.138037	0.619755	0.650409	0.599258	0.63361	0.229658	0.859662	0.876651	0.884594	0.870639	0.870046	0.866985	0.875799	0.837716	0.880703
cg06552160	MYT1L	CTTGCTGCGACATGCTGTCTGCATAATTTCTGTCATTCATGTTTTCTGAGAGCACAACAC[CG]TGTCCTTGGGCTAATAGTTTAAGGGAGTCCACTGTTTCTCTAACAACATCACTGTCTAAG	0.583031	0.488756	0.558623	0.566091	0.507249	0.204544	0.223568	0.233272	0.30654	0.162069	0.51716	0.57581	0.550884	0.514901	0.293324	0.858959	0.859352	0.870244	0.863929	0.846168	0.852265	0.855694	0.818309	0.842789
cg20106776	SOX2OT	GGAGAGCATCGACCCCGCCTCCCAGGCCTTGAGCCCCTTTGCGGCGCAGCCCCAGCCTTG[CG]CGGCCTGGGCTTTGCGGCCACCACAATGGAAATCTACGGGGAAAATGCCAGGGCTGGTTC	0.344593	0.345673	0.356123	0.426627	0.433637	0.0850987	0.194374	0.281977	0.13783	0.487174	0.359894	0.372333	0.468032	0.35685	0.767811	0.0612404	0.0621416	0.0389023	0.0552949	0.0555136	0.0528179	0.0687045	0.0717057	0.0477242
cg23656300		CTTGGCCTTCTTCTCCTTCCTGTGCAGGTATCTCTGCTCTTTCGAGTACAGCAGGGGTGT[CG]ACCCCTTGGTGCTGGGTGCTCAGGGCTGAAACGAAGGCAGCTGGGTCCTGTGTCAACCCC	0.419799	0.420077	0.40945	0.406904	0.315453	0.168305	0.264021	0.217655	0.113023	0.195094	0.4069	0.42242	0.396768	0.386798	0.267205	0.821432	0.792112	0.806314	0.809816	0.829844	0.804509	0.813165	0.725503	0.803042
cg01759112	WSCD1	TTGTGTCCACACCAGCACCCACCTCCCCAGACCAGGGAAACCCCTTCTGGGAAGGGGGAG[CG]CCAGAAAATACTTTGGAGGACCTTGGGACCCTGTGTGAGATGTATTGAATCCTGATTCAT	0.538705	0.575058	0.602812	0.598636	0.639888	0.284548	0.251284	0.268877	0.420603	0.16	0.597221	0.64868	0.605236	0.613498	0.232929	0.851849	0.910758	0.851669	0.853048	0.861917	0.83671	0.851548	0.854118	0.875541
cg23741759		GTATGTCCCTCCAGTGTCTGCTGAGCCACTGGTACATGCAACAGTTCCATTGTTAGGCAG[CG]GAATCCAGGGTAAATAAATTTAGACACACCAGCTCCACCACTGACTGGCTGAGTGGTCTT	0.587378	0.525838	0.558976	0.55455	0.577209	0.35093	0.344284	0.387835	0.236361	0.147645	0.562179	0.566133	0.588779	0.607236	0.284739	0.82821	0.81917	0.825402	0.818436	0.805813	0.780236	0.792995	0.749102	0.803197
cg25391023	BTNL2	GGAGTTCCTTTTTGGATACAGGTGGCTTGGCCCCAGACTTACACTCTTAGATGTTGTTCT[CG]ACCTTTGGACCCAGACTAGCTCACTGGGACATTAGACTATACAGTAAAGGGAGAAGGGAA	0.460162	0.417807	0.465853	0.435338	0.35448	0.114573	0.296475	0.101748	0.0942468	0.311782	0.474067	0.496667	0.434639	0.43854	0.286696	0.845896	0.846384	0.855503	0.836247	0.844482	0.82702	0.861576	0.764091	0.839943
cg09816756	LOC100130017	ACAGACTGTAGTCACTTAACGCCTGGAGACTGTGTGGTTCATAAAACAGGGCCCTAGGCT[CG]CTTCTGGGGACTGTGGGACTGGGACTATGGCCAGAAATTAACATTTGTGTCACACAAAAA	0.441376	0.442281	0.531733	0.528526	0.525191	0.165573	0.152974	0.183646	0.358535	0.405594	0.543947	0.534643	0.544796	0.507901	0.444253	0.869167	0.865973	0.863043	0.864349	0.867241	0.856925	0.84275	0.812414	0.847507
cg25750901	SEC14L3	ACACCCACTTCCTGCCAGGCCAGTAATGTACAGAGATTGGGTTCCTCCACTGCCCTTTCC[CG]AGCCACTAATCCTGCCCATTTCTCACCAGTCTCCTTTCTCACCCTAATCCCTATAATGTG	0.448014	0.355733	0.427581	0.380154	0.389201	0.121863	0.160129	0.210306	0.142593	0.346917	0.366603	0.447797	0.396505	0.390429	0.666635	0.686681	0.709614	0.700076	0.699991	0.719081	0.683425	0.699633	0.658364	0.706399
cg09100014	IRF8	CATTCTATAGAGGCACTGAGAGGAGAAGTGACTTGTTGAGGTCTCACAGCTCTTGTATGA[CG]GAGCCAGCATTCAGATGCAAGATGGCCCAACTGTGAACCCTTGGTCCTAACTCCAGAATA	0.486673	0.461846	0.532961	0.540491	0.466892	0.260123	0.222237	0.327223	0.317886	0.267519	0.48789	0.551897	0.542587	0.470749	0.18572	0.806699	0.794271	0.826214	0.795559	0.805917	0.809698	0.810552	0.759385	0.816704
cg07613153	TDRD9	CGAACAGAAGAAATGGATTTCCTGCTATTGGTAGTCCGCAAACTCTTAAGAACAAATTCA[CG]TTTTGTGAAGGTAAATTTGATTTCATGAGTAACAGACATATTTAGGATTAAGATTCATTG	0.395404	0.382281	0.419639	0.433925	0.446835	0.1521	0.329135	0.128487	0.206531	0.200478	0.436777	0.468974	0.421093	0.426013	0.189657	0.686073	0.687328	0.653029	0.652915	0.681972	0.6491	0.687118	0.633849	0.70434
cg10172979		TTCCCTATTTTAATTAGACCGATGCCTACAGTTATTCTCATTTTTTTTAGCAGATCCAAA[CG]ACATAAGGTAGTTTAAAATCTAGTTAAAAATCATCTAGAGATCTGCCTGAGCAACATAGC	0.425656	0.347816	0.384398	0.420452	0.362	0.134306	0.239267	0.187606	0.149089	0.163207	0.380311	0.404863	0.4793	0.390699	0.253048	0.787188	0.760972	0.807965	0.752056	0.769636	0.733674	0.74205	0.667798	0.758935
cg01664151	FSTL4	CTAAGACAGTCCCTAAAACACCAACCCAGGGAAATTAGGCATGGAGATATAGCAAGCTAA[CG]TTGCAGCAAGCCCTAATGAAGTTAAATTGCATTTCCTATTAATTATCTACTCTATATCAT	0.48043	0.43501	0.499327	0.447653	0.485853	0.0851908	0.321782	0.210297	0.299251	0.183126	0.472987	0.498659	0.476667	0.492115	0.317547	0.803945	0.810413	0.804065	0.80438	0.798061	0.790889	0.788328	0.705776	0.776689
cg26887085	CNR1	AAATGGAGGCCATCAGATGTTAAGTAAATTGCCTAGAATATGATGGATTTGCAGATGAAT[CG]AAGTTTCTCAGACTCCACAGTCTGTTTTGAGATTTTATGTGACGATTTCAGAATTAACAG	0.716548	0.663933	0.670366	0.707381	0.693358	0.445391	0.440132	0.271337	0.351704	0.516228	0.70661	0.677084	0.747371	0.69139	0.509715	0.874252	0.903502	0.86444	0.88983	0.871737	0.889798	0.877101	0.858434	0.894991
cg18235662		AAGAAACAACGCCAATAGCATGCCAGAGAGGCTGAAATCCTTCCAAACCAATCTGGAAAA[CG]CAAATGCTTTAGATAATAGGTGCACTCTAATTCAAATGCCTCAGGTTACATTAAAGAAAC	0.436857	0.361911	0.491149	0.441165	0.374761	0.159225	0.204709	0.231417	0.266914	0.158953	0.419098	0.463802	0.44672	0.40704	0.129569	0.818006	0.850446	0.814061	0.808785	0.826339	0.825187	0.833496	0.775571	0.834709
cg23348723	C7orf16	CTGCTCTGCAGGGAACCTCAGGTAAGACTGGAAAAAATATGGATGTGTGGATGGTGCTCA[CG]TATCTTCTGTGAGAACATATTTCTTGGGCATCACTGGGTGGTCCATTGGCTGCTATCAGG	0.494375	0.403626	0.459359	0.513956	0.451729	0.227003	0.199047	0.245706	0.38007	0.28216	0.468977	0.487724	0.511709	0.479243	0.245689	0.815436	0.819956	0.802809	0.810084	0.825207	0.807604	0.807391	0.761002	0.830109
cg18752774	NLRP14	TCAAATATGATTTAACATATTTGCTGAAATATGAGGAATGGGCTGAAAATTATTATTGGA[CG]TAATCCAAGGCAGTATTTTTAGTCATTCTCAGGTATGAAATATTATAGACCTCTAGAATT	0.706828	0.655162	0.655338	0.689651	0.680871	0.474971	0.364658	0.458622	0.318377	0.349928	0.67082	0.712636	0.7563	0.684113	0.67443	0.849914	0.833303	0.813635	0.868817	0.822179	0.861714	0.844542	0.883664	0.864196
cg13876844		CCAATAGGGTGTGCTGACCCCTCTCCCGTTAGTTAGACACATTTAATCACACTGAAGGCA[CG]CTCTGATAGGTATAACCTTTCAGAACTCCCATCCCTAGATATGTCTGTGATGATCTGGTC	0.375957	0.38534	0.38705	0.484321	0.356564	0.146274	0.156337	0.120758	0.283468	0.103499	0.423187	0.395212	0.467284	0.423646	0.143038	0.855013	0.840681	0.840244	0.826932	0.835196	0.822306	0.867819	0.761855	0.835118
cg10760715	GABRA5	ACACGTTTGAACTTGTTCCTGCAGACCAGGGGTCCAGAGAAGGTGCTGTGTGGGGAGGAA[CG]AGAATGGAGTCTGGGGAGACGGGGCTTCCCAACACCCTGCACTGTGTTGCTGGAAGGTGC	0.638732	0.62031	0.622215	0.622024	0.641829	0.380979	0.486734	0.392037	0.423863	0.299066	0.636437	0.634885	0.634368	0.652052	0.397003	0.813583	0.827958	0.806413	0.801024	0.810444	0.792169	0.817984	0.762591	0.807695
cg21117699		TGAACAATCCCATATCAACCCAAGGACATTCAATATGGATGACCCCTTGAACATTCCAAA[CG]TGCTCCTGCCTTTGTACCTGGTATACACATCACTTGGTGTATATTCTACCTGTAATATAC	0.43329	0.38382	0.368565	0.464504	0.351965	0.165438	0.13998	0.193764	0.10425	0.136037	0.409834	0.364346	0.463782	0.437583	0.245895	0.754286	0.753097	0.758951	0.729909	0.756489	0.740235	0.729209	0.711267	0.728153
cg21537049		CTGATAGATGTAAACCTGACTTCGATGGCCTGACTATAAAACTTCCTCTCTTCCTGGACC[CG]CCTGCCTCCTGCCATAGAAACTAAAACTTCTAGGTATTCACTGCTATGGGCTGAACTGTG	0.498493	0.474895	0.474864	0.514376	0.428858	0.129617	0.207681	0.236148	0.322428	0.11434	0.495615	0.475641	0.515314	0.465888	0.166158	0.796562	0.788673	0.811888	0.787333	0.766043	0.742082	0.763662	0.72109	0.792618
cg10237148		CAGGGCTGGAGCAGCTTGGACCCTGGACTTTCTGTCTGGCCTTGCAGCCTGGAGCAGCCT[CG]CCCATTTACTCCATTGTGTCATATAAGTACTGCTGTTTTCTGCCAGGAGTTGGAAAAGGT	0.52259	0.501062	0.53247	0.525357	0.558259	0.279005	0.287695	0.309386	0.156193	0.154369	0.561084	0.568012	0.528242	0.568844	0.204411	0.802736	0.813652	0.804381	0.779416	0.785638	0.759777	0.806595	0.72842	0.79384
cg08940252		GAGGTGCTCGCCTAATTCCGGGAGGGGCCCAAAAGGGCTGTCAGGTCCAGGAGGCCAAAA[CG]GGCCAGAGCCTCAGTTCTGACTTTTCTCCACATGGGCTTGCTTCTTTCTGGCTCCTCCAG	0.373248	0.397242	0.411631	0.437155	0.345843	0.203857	0.166449	0.132865	0.152074	0.256131	0.388616	0.444677	0.460194	0.395713	0.346262	0.71684	0.706634	0.732592	0.689052	0.709746	0.686615	0.733672	0.655556	0.711446
cg20480497		TTGGTCAACTGCTAGTCTAGATGTCACTGTGAAGGTATTCTTGGATGTAATTCACATTTC[CG]ATCAACTGACTTTAGGAAGATTACCCTCCATAATGTGGGTGGGCTTTATCCAATCAGTTA	0.719114	0.676101	0.717851	0.697881	0.741247	0.428043	0.404017	0.414892	0.439416	0.44844	0.739438	0.712945	0.722642	0.727762	0.342579	0.876078	0.865557	0.892837	0.859731	0.844165	0.880833	0.889479	0.881029	0.891082
cg25778446	GRID2	AGACTGCTCAGTAAGTTACTTGAACTCTCTAAATCTCAATGTCCTGATCTATGCCTACCT[CG]TGATTTGTAAAAAAACTTTGCTAAATTCTTGGCATATATGCAGTGCTCCATAAATGAGAA	0.402345	0.400527	0.472604	0.4262	0.348551	0.0752958	0.19968	0.125736	0.083936	0.251835	0.445324	0.478929	0.416123	0.374663	0.231623	0.814095	0.809643	0.788952	0.791597	0.790643	0.769914	0.801936	0.730548	0.814514
cg06468385		GGGTGTGACCTGAGGGGGTCGCAGAGCCTGCAGTCCTTTCGGCTTGGGCTGCGAGGGATG[CG]CAGGAGCCCTGGGTGTTCCGCGGGCTGAGGGCCCAGAACGGGCTGGGGAGGAGAGAGGGG	0.603349	0.592416	0.626144	0.711336	0.595125	0.401051	0.247868	0.258808	0.339902	0.637733	0.592105	0.590696	0.717698	0.561584	0.658546	0.472757	0.448072	0.354279	0.541773	0.537208	0.520807	0.237843	0.204919	0.122114
cg08312355	TCAP	TCCGGCGTCCCCCCATTAGTGAGTCTTGGCTCTACTTATAGCATCTGACACCAGAGGGGC[CG]AAAATAGCCCCTGGAGAAGGGGGAGGAGGGGGCTATTTAAAGGGCCTGGGAGGGGAGAGA	0.408899	0.341959	0.418124	0.408969	0.350672	0.115401	0.133396	0.273756	0.153708	0.453773	0.31735	0.428475	0.411647	0.296107	0.47813	0.708946	0.67824	0.709274	0.727245	0.731422	0.728038	0.711015	0.644336	0.690224
cg24987667		GTGTAACCTGAACAAGCTTCTTGCAGATATCTCTTCTGGCTGATTTGAAACCCCAGTGAA[CG]ATTGGTGTGCAGATGGAGCCTCATGAGGGCCATGGTCTATTGCCCAGTTCATGAGTGTCT	0.511785	0.412112	0.522784	0.484801	0.444449	0.170743	0.221803	0.246951	0.295871	0.296706	0.442788	0.524812	0.496357	0.432598	0.155031	0.810242	0.814873	0.801592	0.821725	0.838001	0.814617	0.813229	0.78013	0.810194
cg26714678	KC6	CATTGCCTAATTAACTCACCTGGAACATGAAGCTGAAGCTTTCTTTTTCGACAAAGAGCA[CG]CATTTGCCCATATAGAGATAATTTTATCATTGTCAACTGAGAGCAGCTGATTGAAATTCA	0.65368	0.64153	0.620606	0.661915	0.701224	0.159632	0.351401	0.320763	0.500614	0.240954	0.690981	0.664688	0.652865	0.706191	0.456288	0.885783	0.83687	0.847251	0.8495	0.864361	0.856712	0.874858	0.859567	0.863914
cg19871597		GCTGAGTTAAGGCAGGCCACTAAACACATGATCAAATTAGAGGGGTCAGCATTTATGACT[CG]ACTTTCTTTAGCAAAAGAAGGGAAGGTGAGCCCAAGCAATAGACAGAGCTTGATGAATGA	0.363775	0.441217	0.515805	0.463772	0.441431	0.226734	0.318663	0.146271	0.243187	0.111988	0.501654	0.518788	0.493389	0.463211	0.10994	0.855971	0.851181	0.868574	0.854944	0.836567	0.843811	0.840164	0.802196	0.838027
cg02397368		GTGATCCCCCACCTGTCTCCACCTGGAGCTCAGCTCTGCCTTCCTTAGCAGTGTGGATCC[CG]GGGGTCATGGGATCACTGCTGTCTGCACCGGGCCTCCTTCTCCTCTCCTTTGAGTTAGGC	0.57564	0.53182	0.610305	0.62481	0.560102	0.297231	0.319777	0.308223	0.331014	0.135122	0.538414	0.600055	0.60131	0.540191	0.290874	0.854417	0.804197	0.777432	0.847395	0.83577	0.841207	0.851232	0.830403	0.860103
cg26821962		AATAATCAGTCCCCAGAACAAACACTTAACAACCAGACCATACTGTCAGAACTCTAGTCC[CG]TATTTCCACCTAAAAAAACAAACAAAAAAATGTATCTTCAGTCTCTCCATTTCTCTCCAC	0.426002	0.437202	0.532171	0.481858	0.423588	0.156069	0.193678	0.108678	0.217265	0.0945595	0.47766	0.513841	0.4932	0.449563	0.173803	0.829338	0.833594	0.818825	0.833282	0.838002	0.810019	0.808431	0.77331	0.832631
cg01166876		TCAGTGGCCTTGTCTGCTTCCAAACACTGAAAGCTTTGTCCTTTGCTTGATTGCTTAGAA[CG]CTCACAGTGAGCCTCACAAGACAATTCCCTCCCTCTGACCCACCAAAACTTTGCATCCAA	0.366794	0.313935	0.293195	0.33135	0.332775	0.116383	0.156728	0.107947	0.0969927	0.0996023	0.314347	0.328021	0.315627	0.346192	0.118263	0.694151	0.680688	0.706071	0.692636	0.68989	0.69593	0.6561	0.569645	0.653743
cg23851515	NRXN1	AAAAAAAAAAAGCTCATTTCTTCACAAAGTCTCTGGCTGTGGCAAATAGAACACACCATC[CG]TTTATAGAGTCTGCTAATTGGCACTAGGGCATTGTCTGGGCTTGCACTTCTTTACTGGCA	0.707518	0.684263	0.697283	0.705993	0.667498	0.394771	0.538725	0.189809	0.340528	0.337729	0.72468	0.720412	0.750083	0.724807	0.429707	0.843342	0.856769	0.874596	0.842939	0.834255	0.849378	0.845209	0.831897	0.870513
cg24540710	COL1A1	CAGGGCCAACGTCGAAGCCGAATTCCTGGTCTGGGGCACCAACGTCCAAGGGGGCCACAT[CG]ATGATGGGCAGGCGGGAGGTCTTGGTGGTTTTGTATTCAATCACTGTCTTGCCCCAGGCT	0.560616	0.576172	0.566881	0.64509	0.616636	0.328196	0.31897	0.353814	0.479955	0.21365	0.578156	0.582421	0.654036	0.541963	0.183099	0.930229	0.908998	0.930541	0.916164	0.908172	0.921738	0.909019	0.857348	0.93241
cg06792975	MUC7	AATTCCTTGACACAAATGACCTTATCTTAAATCTAATAGATTTCCTATTTCCAAAAAGCT[CG]ACTGGAGTGTTATAAAACCTGAAAATTCTCTTGTGCTTTCTCTTCTTTTGCTTCTAGTTA	0.349101	0.380162	0.494464	0.388352	0.317017	0.0942582	0.12581	0.100345	0.132624	0.0903609	0.418667	0.460945	0.402898	0.365395	0.084544	0.860998	0.865739	0.861555	0.847769	0.870644	0.839416	0.867203	0.822002	0.846213
cg24878483	LRP1B	CTAGTGCAACAAGGTTGTCCAGCTGGATACAGGGATTCAAACAATAAGAGAATGGACATT[CG]GGGATGCAAAGTAACAAGCAAAAACTTCATGTCCTTTGGCCAAAGGAAATGAAATTAGAA	0.668206	0.690493	0.725942	0.713573	0.720019	0.515111	0.523055	0.43954	0.505815	0.42972	0.71207	0.660498	0.719242	0.722184	0.600975	0.882804	0.877034	0.861327	0.873926	0.855297	0.859765	0.878232	0.871801	0.872148
cg09316607	ADARB2	GGCGTGCATGGCAAAGCTGCCACGGAACAGGTGTGGAGGTGATGGTGAGTGGCAAACCTC[CG]TGCCCAAGTGGGACACAGCTTGTACTTTCTTGAATTGTTGAATTTGAAAGCTTGAAGAAG	0.57183	0.494997	0.572723	0.554848	0.578067	0.264115	0.393654	0.174009	0.340279	0.168973	0.550975	0.619077	0.598165	0.586235	0.293889	0.816454	0.816051	0.822493	0.804354	0.830566	0.819043	0.812873	0.783617	0.818777
cg24681654	CCDC129	GAACAAGAGAATGAAGGGAGCAGGGAACAAGCAGCTCTCCAAAATGTTGTGAAGTTTTAA[CG]AGGCTGAGCTTCTGTTTCATATAAGATGATAAAAGTACTGTGTTAGGAGAAGAAACAGGC	0.700897	0.645356	0.682406	0.669519	0.639605	0.315245	0.494804	0.401339	0.266545	0.206676	0.648759	0.710215	0.673228	0.623606	0.444684	0.882128	0.880264	0.885368	0.895678	0.88805	0.866525	0.892294	0.849982	0.887388
cg09529093	ANGPT1	AGTTATGCCAAACACAGCAATAAAATATTTGAACCACTTTTGCAGCCTCTTGAACTTTTG[CG]TGTCTCCTCATTGAGTCATGTATCACTCCTGTGCAACAATAATAATGGCATGCATTAAGA	0.545609	0.488941	0.598322	0.597707	0.538816	0.441777	0.137332	0.112137	0.0690845	0.0582633	0.506571	0.567414	0.570224	0.502105	0.0439572	0.899403	0.912632	0.920061	0.902724	0.890482	0.87766	0.898024	0.854669	0.905632
cg03249573		GGACAGAGTGAGCGCTTGATGATCCCGTCTAAAAGTCTCAAAATGAGCCCCCTTTGGTCT[CG]CTCTGTCGCCCCAAATCCCTCTCCCGCCTCAGCTGCAGTTTCTCCAGCTCCCGAGGAAGG	0.424138	0.531345	0.526906	0.441564	0.484789	0.190046	0.35245	0.262329	0.219571	0.22756	0.571628	0.539798	0.457011	0.510679	0.386051	0.108716	0.112094	0.108997	0.111011	0.117958	0.0954508	0.120229	0.163118	0.106902
cg24360034	OR8B12	AAGTAAGATGACATAACTAGACAAAAGTCCCCAAACCACCTGCAGCCAGAAGGTGAATTT[CG]GCAGTATGGCTCAAATGGCTTGCACTTGAAATCACCATGTTACATAAGTGACCAGCATCG	0.567537	0.583287	0.590409	0.619924	0.53371	0.303313	0.327176	0.119435	0.207533	0.172768	0.596515	0.608847	0.650482	0.561052	0.325627	0.833754	0.840891	0.819099	0.859314	0.830094	0.854028	0.856843	0.800809	0.842215
cg21139496	DERL1	TGAACTGGGCCAGCCAGGCAAGAGATCTGGGGGAAGAATTTTCCATGCACAGAGAAAAGC[CG]CTCTAACTAGGTTGGAATGTTGGAGGAACTAAAAGCCAAAATGATCCATCTTGTCTAATT	0.444034	0.30656	0.39956	0.43892	0.372693	0.112222	0.1778	0.08946	0.174984	0.403947	0.334441	0.394918	0.449606	0.280583	0.791882	0.792379	0.795001	0.756274	0.755296	0.792413	0.762568	0.755989	0.770605	0.777916
cg02444118		ATATTCACCAGCCTGTATCCTCTGACGGGGGATAAAGCGGCCTCTGCTGAGCCCATTTTT[CG]CTTCTTGGTCCCATTCTGAAGGAACAGCTTCATCTCATGTATTCGTGTGCTCTCTGCTCC	0.568968	0.59028	0.624665	0.637209	0.630491	0.298891	0.415433	0.464259	0.392056	0.269203	0.624486	0.654038	0.628354	0.625113	0.327224	0.838225	0.829887	0.824904	0.85117	0.836768	0.81702	0.837066	0.806683	0.828041
cg23066159	KLK7	ACAACAGCAGGAATGCATTAGACTAAGTTTGAGACCCTTCTGAGTGTGGGGCTCTGTGTC[CG]TGCAGAGCTTGCACATTCATGAAACTGGCCCTCACCAGGGGAGAAGGGGAACACCCTATT	0.479937	0.45829	0.463219	0.575583	0.493013	0.362486	0.222698	0.178363	0.158809	0.269724	0.4805	0.488447	0.584572	0.482066	0.251085	0.862782	0.858757	0.835515	0.851875	0.837994	0.852274	0.82711	0.801325	0.836655
cg07296597		GTCAACTTACCAGCTGGAAACTGGGACCAGTATCAATTTCTTACTGTGACATTCAGCCCT[CG]TTTCACCTCTTGACCCCTTTCATGCCTGCATCAACCAGTAGTTCTGTTGGGCTCAGAGCT	0.540185	0.520843	0.600231	0.585717	0.579289	0.278513	0.379247	0.402886	0.396118	0.325314	0.551234	0.604008	0.598226	0.558161	0.416679	0.834797	0.845242	0.834384	0.865884	0.833627	0.81165	0.83082	0.791225	0.840147
cg02510802	SPAG4L	GTGGGCCACATCTTCGAGTAGGGCGCCTGGGTCCCCAGGGCTCCTTGAGGACCGTGGCAT[CG]ATTTCCTTCTTTAGGATTGGGGATGGAGATGGGAACTCTGGGAGCTGGTGAGGAGGAAGG	0.676492	0.624847	0.645717	0.683559	0.704287	0.49172	0.488623	0.454223	0.415082	0.444986	0.64441	0.604468	0.649195	0.705841	0.427965	0.906634	0.888757	0.930015	0.913468	0.923624	0.895873	0.884757	0.880071	0.904984
cg03872376	ZP4	TATTAGTACAGGAGGAGACGTTGCCTCCTGGTTGAGGTTTACAGCAAACTGGAAGCTCCA[CG]GCCCACAGTGGAGCACACTGGAATAATCTGGTGCCTCAGGCTTATGCTGGCCACTCACAG	0.611619	0.554705	0.58591	0.616016	0.616138	0.289336	0.249435	0.36569	0.30944	0.30394	0.577349	0.602739	0.629525	0.622234	0.42248	0.861015	0.845821	0.841228	0.83936	0.824913	0.80931	0.824761	0.800872	0.861899
cg23696214		TGTGCTTGCACGGGGTGTGGATGTGGTTTGCTTCAGGCACTTCCCTTTGACAGAGAGGGA[CG]CCCAAGGATCCTCCAGGCTGTTCTGCAACCCCCTGGGAAGCACAGACCCTGGGGCAGAGG	0.494473	0.460957	0.501459	0.538127	0.505011	0.285744	0.284188	0.269556	0.221498	0.292583	0.501221	0.511342	0.530242	0.50431	0.227469	0.748566	0.739947	0.763202	0.752342	0.765261	0.74525	0.692413	0.723782	0.738698
cg19388273		TATGCAAGAGTACGAAGGACAATGTTTTTAATAAAACCTTGGCTGCTTTTCTGTAAGAAT[CG]ATGCAAGTAATTTTATCTCTTTAGGGGTGGTTTTCAAAGCAAGGGGAAGAAACAAATTGA	0.570639	0.521737	0.525362	0.602318	0.5903	0.262406	0.299711	0.41261	0.384148	0.278371	0.557702	0.579193	0.711949	0.565123	0.589907	0.81191	0.799073	0.818905	0.814963	0.839366	0.81399	0.836856	0.820622	0.804097
cg01208318		TCTGCTGGCCTCCCACGTACCCCACATTCTGGCCTGACCCCTCAGAAGCCAGACCACTGT[CG]GCCTGGGAAGTCCAACTGCAAGCAGACGGCTGCTAAGTCACCCCCAGGAGTCCAAAAACC	0.571026	0.549835	0.562963	0.58283	0.602737	0.255649	0.367121	0.421708	0.314682	0.378361	0.539198	0.586441	0.584431	0.557822	0.431043	0.816275	0.80316	0.799268	0.815735	0.802199	0.787047	0.77729	0.729795	0.769158
cg14283802	CNGB3	GCCTAGTCTGGCCTGGCCAACACCTTGATTTCAGCCTTGTGAGACCTGAAGCCAAGAACC[CG]GTTGAGCCCACTCAGACTTCTGATTTGGACCCATTTGCTAATAGCTGGGTGGTTTTTAAT	0.637049	0.601432	0.657587	0.665562	0.638906	0.450003	0.340728	0.346746	0.50222	0.278483	0.653104	0.663961	0.685326	0.665582	0.290719	0.875663	0.850982	0.867546	0.847946	0.853732	0.851185	0.851021	0.814279	0.856342
cg10839475		CCATGTTCTCATCCAAGAGGATGAAACAAGGTGGCCTTTAAACCCAGCTACTCTGGAGGC[CG]AGGTGGGAGGATTGCTTGAGCCCAGGAGTTTGAGGCTGCAGTGACTCTGTGTCTAAAAAT	0.371066	0.37097	0.379757	0.361215	0.513619	0.154067	0.21251	0.124259	0.273901	0.302884	0.398282	0.395382	0.371524	0.4172	0.425074	0.841563	0.832272	0.829242	0.820078	0.825464	0.828046	0.826112	0.806951	0.837407
cg25280526	TTLL9	GGCCAGAGGTCAGAATACCGCGTGTTCCAACCTTTGACCCCATCTCCTCAAGGTTATGGT[CG]CCAAGACCTCAGCTCTGAGTTGTGCTGGGAACTCTCCAGAGGGCTAAGGGGAAATGAGGA	0.432331	0.449481	0.453709	0.409069	0.438045	0.295189	0.134508	0.223944	0.259492	0.276748	0.484275	0.453052	0.410141	0.432609	0.509112	0.684389	0.68357	0.654322	0.667312	0.675002	0.627163	0.600543	0.635445	0.666612
cg05787038	DEFA10P	GAATACCAAGGACCAGAGATGCTAAATGAAGCCACCTAAGTGACATGGACCATTGAGACT[CG]ATTCCAGACTCTCTCTCCCGTCCAACCCTCTAGACTGTGCAGCTCTCTGCATGCCGGCCT	0.493895	0.40897	0.450003	0.516806	0.425164	0.0828813	0.203437	0.172307	0.298663	0.105989	0.410433	0.481185	0.523895	0.428912	0.183093	0.825518	0.832223	0.836166	0.821551	0.834015	0.831806	0.831308	0.761656	0.798291
cg12286910	MEGF11	GACCTCCCCCCTCCCAACTATCCTCCCCCTGCCCTGAATGCCCTCATATTCCAGCCTCCC[CG]ACCCCAGGTTGGCCCCAGGACATATTTACTGACCTTTGGCCCAGATCATTTTCTAAAATT	0.56004	0.488826	0.593875	0.510488	0.515092	0.194446	0.264582	0.325794	0.302258	0.521233	0.577702	0.612856	0.548028	0.571087	0.369149	0.834169	0.822474	0.832057	0.812882	0.838655	0.80561	0.848725	0.813253	0.817841
cg26236741		ACTACCCAATTTCAGCAGCCGTTTTACCCCCATGAGATTGCAACACAGCAAGATCCCACA[CG]TGTGCCTATCTGGGCTGCGTGTGTGAAACTCTCCAGCCCCATTTCTGAACTGAGAGGAGG	0.378493	0.387644	0.380545	0.319067	0.298342	0.185424	0.151901	0.130777	0.127283	0.13117	0.41763	0.397496	0.30725	0.336391	0.115114	0.691022	0.679895	0.690929	0.67835	0.696788	0.674169	0.681901	0.630876	0.703926
cg09175338	MYH4	AACTGGCTTGACCCAGGCAAATAGAATCAGTGAAAAGCCTGGATTGGCACCTAGAAATAT[CG]ACTTCCAGATAAACACACCTTGATTTTATCATGCGGTCTCTCTGATATATCTTTATGGGT	0.462807	0.532452	0.555564	0.583754	0.553872	0.16268	0.320567	0.229288	0.313376	0.257573	0.570709	0.524319	0.566208	0.55245	0.322933	0.877317	0.891009	0.793709	0.848289	0.878243	0.82147	0.82767	0.85998	0.867427
cg10612692	RIMBP2	GACAAAACAAAAAATATTCCAGCAGGCTGTTAAAACTCAGCCAAGCTGGCAGTACAACTT[CG]CTTCCAGCTTCAGATGAAAACCAGTGCATTTTTGCAGGTGCAAACTGGGCCATTTGGGCA	0.450593	0.434165	0.545418	0.537643	0.491794	0.322414	0.296874	0.303851	0.204804	0.134759	0.461128	0.527325	0.561393	0.490642	0.127412	0.861219	0.846078	0.851823	0.836763	0.856589	0.856612	0.838956	0.808568	0.850494
cg26985818		CTGGACTTTTCATCTTAAGTGAAACAATAAGTTCCCTTTGTGCTTAAGCTAGTTTGGGTC[CG]TTTCCTACTGCTTTCAATGGTAAATGGATCATTCTTTATATTATTTTCATATTGTTAGTT	0.428696	0.391872	0.478115	0.521794	0.392041	0.157809	0.235445	0.298441	0.248836	0.132279	0.476242	0.473263	0.534836	0.406462	0.142163	0.827446	0.872809	0.866713	0.84748	0.837196	0.860256	0.852739	0.800843	0.856267
cg10820084	COL1A1	CAGTAGCACCCTGGAAGGAGAGAACATAGGAACAGTCAGAGGGAGAACAGCCAACTCATC[CG]ACCCAGCTGCCCTCACCTGCCACCGCTGCCTGGGGAGAGGGGAGAGGCTCAACAGAGAGG	0.65134	0.620904	0.606359	0.698913	0.66684	0.522256	0.157464	0.108975	0.237175	0.0747271	0.527212	0.568145	0.624582	0.582392	0.0813822	0.934446	0.916959	0.929373	0.907603	0.914521	0.913776	0.922602	0.887611	0.932116
cg01897944		TGCATGGAAGGCCAGCCACGAGGGAGCACATCCATGTGAGAATCTGAGGAAACAGTGCAA[CG]CCATCAACATGGCATCAAATTCTACCACAGCTGCTTTGTTGCCTCTCCCAGAAAGATCAA	0.537605	0.530965	0.459715	0.525503	0.518346	0.15497	0.112347	0.0972285	0.0729425	0.173109	0.441579	0.425211	0.54586	0.434336	0.235852	0.822733	0.824989	0.827241	0.808537	0.826996	0.813298	0.842746	0.757727	0.833661
cg07811255		TCCAGTCAAGGATGTGGGATAGTGGGAAGGTCTTCCCCATGCCCCAAAGCGAGGAACAAA[CG]TGGAGAATACATTTATCTGTGTATTGATTTGTAATACATAAGTCTTCTGAAGTTAGAAGA	0.638201	0.571446	0.638938	0.608336	0.651674	0.124384	0.419837	0.256843	0.380881	0.342657	0.613	0.622862	0.636466	0.5878	0.316499	0.866291	0.869558	0.887162	0.87308	0.834816	0.870706	0.832838	0.839534	0.855421
cg07083862	TPO	TATCCAAGCGCGGAGTCAGTTTATAAGGTGGGTAACCAAGTCCCTGGAAGGCAATTAAGG[CG]CCCATTTCAGAAGAGTTACAGCCGTGAAAATTACTCAGCAGTGCAGTTGGCTGAGAAGAG	0.667441	0.620074	0.681969	0.672325	0.68537	0.440671	0.495558	0.437005	0.360496	0.227288	0.671184	0.70284	0.698323	0.697074	0.501008	0.871289	0.883725	0.882422	0.855405	0.85683	0.82885	0.866344	0.840133	0.853755
cg24946729	DTNA	GTAAGATTCCAGGAATGAACTAAATGTTTCTCTGAGCCCAAATCAACTATCATCTGAAAT[CG]TGGTGCAGAGAAGAAAGGTGCAATTCCTGTAAGGCTGTATTTTTCCTTCTTCTGGTTCAT	0.353845	0.303931	0.415326	0.470947	0.386827	0.178913	0.15302	0.142379	0.215687	0.417832	0.341716	0.43173	0.474591	0.327892	0.461404	0.816249	0.758714	0.819805	0.817504	0.823533	0.796098	0.812989	0.778353	0.820191
cg02431866	SGCZ	CATCTCACCTGAAGCATGCTGGCCACTCCAGTCCACCAAATGCAGTTCCCTTGGGACCTA[CG]CTGGATGGATACCCAAGGTCTCATGAGGTAAAGGCTAGGACACTTGCTCTTTCTGACCAG	0.574953	0.564647	0.619808	0.628493	0.591441	0.33395	0.303707	0.303639	0.472033	0.272799	0.586922	0.635834	0.652021	0.633955	0.259332	0.835441	0.830742	0.843173	0.833808	0.814991	0.822921	0.813351	0.778942	0.811262
cg22377480		TGATCTCTGGGGAAATATAGTCCAGAGGATCATAATCACCTTGAGTCTCAGAGAATGTCC[CG]TTGGCCTATTACATTGATAGCATCAAACAAATTAAACCTCGGAGAGCAGAAAGCAGCAAG	0.639603	0.645015	0.711882	0.685899	0.656586	0.490567	0.437655	0.414699	0.448146	0.230683	0.661516	0.748892	0.68546	0.641916	0.270283	0.907498	0.88664	0.892319	0.886696	0.899015	0.890337	0.896939	0.865227	0.896936
cg08098111	FLJ25363	CAAAAAAGCACCTTGTTAAGAACCAACAATCAGGTTAACGATCACAATACCTGGCTTTAA[CG]TCATATCACTGAAAGGCACTGAAGAGGGTAGGAAAGACAGTCTTGAATTGCCTGCACAAC	0.448014	0.420855	0.420694	0.478433	0.378969	0.197959	0.226525	0.257197	0.153165	0.195193	0.432217	0.462976	0.483019	0.429072	0.20305	0.659582	0.62667	0.641329	0.673136	0.690738	0.675953	0.662814	0.688478	0.687875
cg10576132	TXNDC3	TGACATCTGGAATTAAAATGACTTCCTAAGATTTTTGACCATGGCTCTGAGCTTTTGTCT[CG]CTTCCTTGGCTTACCTTAGTTCTACCTTCTTCCTTTGGACACTCTCTCCACAGCCCAGAA	0.539579	0.455682	0.519344	0.52625	0.423592	0.207546	0.164719	0.343319	0.327237	0.11364	0.48323	0.51574	0.54279	0.464815	0.111806	0.862398	0.856388	0.883804	0.846238	0.861498	0.832817	0.854659	0.808687	0.851913
cg07743747	CCR2	ATGTGGATGAACCTAGAGGATGTTAAGTGAAATAAGCCACACACAGATAGACAAATACCA[CG]TGATCTCACTCTTATGTGGAATTTTTTTTTAAATAAGTTGCTTAGCCGGGCATGATGGCA	0.52835	0.509729	0.563404	0.524509	0.475019	0.256836	0.374599	0.267444	0.375101	0.257616	0.501583	0.573341	0.529516	0.475511	0.30046	0.802369	0.730274	0.746496	0.750944	0.76217	0.756224	0.764521	0.744035	0.803457
cg27223882		CTGGGCCAGGCTATCTTCCATGATACAATTAAAACCCAGAAACCCAGGAGGACTGACTGT[CG]ATTTCTCTGTTTTGACATACTGCCACTTTTCTCTACCACTGTTATACACTGGGGTTGATT	0.563463	0.635298	0.558559	0.541965	0.609175	0.360584	0.375316	0.2623	0.339599	0.152884	0.625436	0.588665	0.53404	0.620934	0.262821	0.83521	0.824763	0.818886	0.82648	0.838305	0.820621	0.832987	0.835085	0.838018
cg05387565		GGTTAGAATTCTCGGGGGTCATAGGAGAATCTTAAACCCACAAGCCAGCAGCAAGCACCC[CG]TCTTCAGGCCCTTTGTGCAAAGCTGAGGCTTCAGGGAACCCCAAAACGCAATCCATGCCC	0.483785	0.401444	0.472472	0.45404	0.429953	0.205126	0.211216	0.156217	0.310676	0.171207	0.467907	0.505155	0.464177	0.464854	0.315109	0.758419	0.747503	0.750389	0.739769	0.729537	0.721148	0.728283	0.675419	0.739033
cg03997517		TTATTTGACTTCCTTCTTAGTCTGTTGTACAGTAAACTACATTGATTGATATTTAAATAT[CG]AACTAGGCTTCCATCATTGAGATAAGAACATGATTGTGATGTAAGTTTTTTATATGTTTC	0.666296	0.638971	0.669441	0.708757	0.638932	0.271112	0.465977	0.373434	0.378548	0.218053	0.648308	0.65316	0.707989	0.651023	0.427566	0.894479	0.905467	0.87399	0.861724	0.894299	0.910387	0.876394	0.84893	0.87569
cg00031346	FRMD1	GGGGGCCAAAGCCCCAGCATCTTCCCCACAACAGGTCCTCTTATGACCCCTCCCCCAGCC[CG]AGGCACTGCTGGGGACCCCAGGAAACTACAGGACATCCCCCATTAGCTCAACTCCAGCTT	0.480971	0.333643	0.415435	0.426402	0.348489	0.101904	0.239237	0.0960807	0.0992014	0.124231	0.394729	0.458764	0.489231	0.397262	0.148531	0.815555	0.816026	0.815323	0.817608	0.841496	0.797622	0.819183	0.772192	0.812772
cg10529845		TGTGGCCCAAGGGTCCTGGTCCATTTCCCAGCCTGGGCAAAATTCCTCTGCCCAGAGAGC[CG]CTAGAAACTGACAATTTGTACATCTAAATACAGCAGCAATGAACCTTAGGCTTTCAGTCA	0.418364	0.323197	0.419075	0.439333	0.329119	0.128305	0.187805	0.113506	0.120108	0.0877194	0.350861	0.426931	0.460931	0.34743	0.113899	0.781472	0.76552	0.782996	0.771145	0.759975	0.752696	0.776479	0.726877	0.766201
cg09922612		TAATGAATGTTTTCTGGTGAACAAATGCCTAAATACAAAGATCTGCACACTTTTAGCCTT[CG]CCCATAGGTATATCCACTTAATACTGCTTTAGACCTTCTTGTTCCCTATCTTCATTCCAG	0.673825	0.66714	0.713983	0.688376	0.689673	0.353504	0.42673	0.544114	0.485291	0.353376	0.693359	0.724565	0.690989	0.68251	0.466411	0.866226	0.879929	0.854049	0.854996	0.874252	0.863161	0.870277	0.826214	0.866347
cg06683148		GAGAAATAAGGCCTGTTTTGTAAGCTACTGTGGGGAACCCCTTACTCTCACACAAGTAGC[CG]TTATCTGATTATAAGTCACCCTCAGTTCTTATTTTTTGAAGGGAAGAGGTTAAATACAAC	0.536018	0.503442	0.554339	0.485665	0.580393	0.242309	0.345849	0.243919	0.388683	0.302415	0.572336	0.549692	0.512262	0.56619	0.130333	0.842716	0.848857	0.852773	0.838154	0.832051	0.829147	0.850746	0.785063	0.843915
cg02336334	MIR518A2	TTTGTGTGTGTGACAATGTATGTTCTTGAACATCATAGATTCCACTTTGGATGCTCCTGT[CG]GGACTGTGTGTCCCTGTGCTGGAACTCAAGTGAGAGTTGGCTGAAAATCCATTGCTGTTC	0.503126	0.420702	0.423526	0.54546	0.488426	0.197068	0.265062	0.236273	0.214669	0.180398	0.452157	0.480691	0.546148	0.4857	0.206886	0.811538	0.832799	0.837477	0.830103	0.80215	0.809211	0.834779	0.810897	0.858145
cg07428782	ACCN1	GGGGGATTGGTCCGTGTGGTGATGTGTCTCATCTTACAATGTCCTATGCAGCCTTCAAAG[CG]TTTTTAGATCCTGGCAAGGAAACAGACATTCATGTGCGTAGGGTTTGCAAGGCCTCTGCA	0.397506	0.392925	0.387547	0.493215	0.374991	0.148596	0.153928	0.28164	0.24954	0.0925768	0.400134	0.412568	0.520082	0.351878	0.164537	0.790321	0.790966	0.770548	0.784519	0.78097	0.774255	0.791273	0.719693	0.795694
cg05648914		TAAAGACTTCATTTTCTGAAATGTTCTGGAATCAAACTGAAATAACCTGAATCCAAAGCA[CG]AGAGTGACAGCACGTTCTTATTCTTTGTTTCTTTCATATTCCCTGTCCACCATAGGGGAA	0.43626	0.536209	0.502367	0.573326	0.501871	0.126754	0.340374	0.283729	0.181821	0.154436	0.573971	0.517587	0.546258	0.514491	0.188333	0.822836	0.798019	0.808457	0.820386	0.816735	0.8328	0.841017	0.825638	0.840601
cg21080533	PGK2	GCCACTGTTAGACTGGAAAGCAAATCTAGCTTTGTGATTGGCTCATGGTCCTGTCAATCT[CG]ATCTGAACTGTGTTGCTAGGTGAAGATTCCAACTTCCTGGGCAGAGGGTCATGTAGTGGA	0.449455	0.380011	0.428411	0.447556	0.381325	0.163153	0.283089	0.171018	0.218141	0.112319	0.432724	0.444165	0.460716	0.404077	0.158979	0.748419	0.755683	0.76329	0.775313	0.71265	0.70685	0.77304	0.683947	0.782559
cg07649045		GGAAAGAAGAATGGTTTTACCACAACTGCCTTGGACTAATTAGTTTTGACCTCCAGGATC[CG]GGAAAAAAGTCATACTCCCTCAAAGCACCTGGAAGAAGGTGGCTACATTAAAAAATATAG	0.563584	0.588367	0.588831	0.569358	0.56244	0.217405	0.268064	0.26606	0.484013	0.364139	0.632418	0.615076	0.64968	0.604563	0.505048	0.840881	0.801925	0.785926	0.820535	0.828031	0.800058	0.830017	0.760603	0.856316
cg16330550		ATTCCCACAGACTTGCAGAAGGGGAGATGAGTCTGTAGTGTGTACTTTTAAATTGGTTAG[CG]ACTGTTTGCTGTGAAATGGGCACTTCCCCTAGACACTACTTACATGTCCTTGAAACAATG	0.490871	0.448684	0.468216	0.402157	0.391207	0.261035	0.199564	0.0813517	0.310897	0.178678	0.452894	0.513146	0.424228	0.432067	0.202331	0.77459	0.758435	0.756814	0.748934	0.733538	0.72294	0.729129	0.721055	0.70562
cg14908307		AAGTTACAGGAAGGGCTTGGCAGATGGGTCAGGGAACCTGGTGATTTGGACTTGGCAACT[CG]GCCTCAGTCAGACTCTTGCTGGGGCCAGTGCAGTCCCATCTTGTGTTTAACCTACTTTGA	0.357484	0.350676	0.435635	0.486596	0.432824	0.0736961	0.135914	0.228049	0.147248	0.180319	0.393865	0.419909	0.506112	0.368585	0.168611	0.818731	0.810691	0.805317	0.817497	0.801292	0.800984	0.807216	0.767473	0.788334
cg20998127	VIPR2	ATCTGTGGGATTCCAGGATGCCTGCTCCTGCAGCATTCTGTGGGATTCAGGGCACCATCC[CG]TGGATTCCAGGATAATTGCTCCTGAACCCTTCCATGGCATTCTGGGAGGCCACTTGGCCT	0.521326	0.495818	0.549398	0.553256	0.59815	0.154583	0.23464	0.246807	0.176555	0.282297	0.547369	0.534766	0.576024	0.601153	0.321909	0.841984	0.856521	0.841927	0.842948	0.841217	0.823256	0.832634	0.784702	0.823394
cg24478779	LOC150622	ATTCCAGGCATTTGGACAAATGTATAATGACATGACTCCACCATTTTAGTATCATACAGA[CG]AGTTTCACTGCCCTAAAATCCTCTGTGCTCCACTGATACTTACTCCTTCATCCCCTTGCT	0.541829	0.568942	0.577981	0.55509	0.508011	0.211669	0.26316	0.245436	0.292485	0.100367	0.606833	0.595201	0.526179	0.583633	0.135991	0.819609	0.783388	0.712619	0.813647	0.836947	0.804394	0.81575	0.758579	0.837206
cg25281820	GALNTL6	CAACACCTCCATTTCTTGGTACCAACAGCTGTATCCATCGGATTAGGCTAGGGCATGCTG[CG]GGCCTCTGCTTATCAATCTCTCTAGAACCACACTGATGGATATTTCATGCCATTGCAAGC	0.586392	0.563238	0.579512	0.584318	0.509262	0.296499	0.342206	0.388976	0.3449	0.200943	0.617936	0.583563	0.602048	0.563456	0.28376	0.825515	0.809507	0.831205	0.8031	0.816577	0.784391	0.826905	0.775693	0.826867
cg13614617	IGDCC3	ATCCCAGCTTCCCCACTTACTGTGTACCCTCGGCCAATTTAATTAATCATTCTGGGATTT[CG]TTTACTCATCTGTAAAACAGGGCTAGTAATTCCTATTAATGGAATTGTGGGAATTAAATA	0.490819	0.444144	0.532788	0.47141	0.506033	0.288594	0.38716	0.201038	0.244472	0.189371	0.510187	0.53482	0.491548	0.486096	0.405971	0.752861	0.754601	0.787491	0.770003	0.767338	0.748581	0.741653	0.720687	0.784938
cg25771451		ACTCTCTTTTCATGATAAATAGTTCGAAATGCAGGCAGAGTAGCTTGCAGAACAATGGAA[CG]AAGCATCTCCTTGTGTGCTTGCAAGCAACTAAAGAAATGAGTTATGTGAAACTAATGTAA	0.537224	0.496649	0.545947	0.479423	0.484676	0.194345	0.297244	0.288355	0.426962	0.247085	0.530624	0.582751	0.494219	0.535271	0.32467	0.687384	0.661011	0.67492	0.576809	0.671123	0.637172	0.735877	0.716739	0.770428
cg12403132		ATTCTCTATCCTCTGCCCAATTCTGCTGGCCCATTTTCTAGGAAACTCACAGTAACCACC[CG]AAGACATTTGCAGACAATTCTACTCTTGCACCACAAGATAGGTTCTCAAAAACAAAGGAA	0.647858	0.657379	0.679384	0.672001	0.693606	0.37728	0.36895	0.556334	0.53744	0.398135	0.630167	0.687326	0.682167	0.662227	0.43261	0.843401	0.853712	0.853446	0.840699	0.842828	0.829577	0.819202	0.80936	0.849709
cg07646665		GGGAAGTATGGGATTGGAGCCCCCATAGAGAGTCCCCACTTGGTCACTGCCTAGTGAAGC[CG]TGGGAAAGGGGAACACTGTCCTTCAGCCCCGAGAATGGTAGAGACAATGGCAGCTTGCAA	0.554984	0.535575	0.560486	0.562231	0.474714	0.187972	0.347147	0.26039	0.287637	0.235342	0.524486	0.572549	0.601409	0.480687	0.219702	0.815883	0.838365	0.794009	0.834071	0.822846	0.779975	0.811038	0.775	0.834783
cg01201215	ATOX1	TGGGCTTTTTATATTTTTATCTGCCAAAGGCCTCAATTCTTTATATAAAAAACGAGGCCA[CG]AGCAACAATATATGTGATAAGACTGAGTGATCTGCAAAGGCAGGCTAAGACTGACTTCCC	0.350478	0.313354	0.330951	0.441397	0.309894	0.105148	0.115155	0.13357	0.210377	0.360139	0.292205	0.346756	0.40844	0.287883	0.179095	0.787607	0.773495	0.801793	0.765808	0.788254	0.758532	0.754858	0.690258	0.775025
cg24158157		TGCTGGGGACACAGCAGCCGCAAGACTGACAGAGCCCCTGGTCCATGGCCCTTACATTCA[CG]AAAAGGGGGACAGGATCAGACCAAACACCCAAACCAGGGTCCTTTTTATACCAAAAGAGG	0.473903	0.463838	0.456514	0.537126	0.455891	0.296388	0.268079	0.199984	0.339731	0.256725	0.470785	0.451768	0.534852	0.477464	0.159241	0.812632	0.810026	0.815768	0.766273	0.787032	0.771239	0.772352	0.715079	0.794816
cg26475330	ANKFN1	ATAAAATGTCTACACCAATAGTCAGCACCACACACCCTCTTGTTGCCTCTGAATCGGCCA[CG]TGGGATGCTTGGCGTCATATAGACCAAACGTTCAGATGTTGGACTCATTTTTTTTTTAGT	0.645115	0.619774	0.635916	0.662862	0.683406	0.410628	0.242092	0.378259	0.261531	0.257731	0.665007	0.638053	0.670601	0.645257	0.32343	0.849649	0.858268	0.859094	0.853743	0.837027	0.85178	0.833726	0.807268	0.830439
cg16112276		ATAAGACTTTTATATATCTTTCTCTGAATGAGATTGGGAGTGACAGCAGGACTTGCACAA[CG]AATAACAAAATGTGGCTTTTGTTTTAAAAGGAGTGTTCTGGTTTTACATAGAGAAAAGAC	0.468066	0.327573	0.429136	0.440492	0.378956	0.166118	0.274439	0.165832	0.0962033	0.15573	0.389458	0.427563	0.494437	0.402119	0.154616	0.816629	0.803462	0.800645	0.791729	0.782114	0.725765	0.77882	0.755359	0.817396
cg14959260	SLC2A9	ACAGGTCCTCGTCTACCCTAGAAGACCTCTTAGTCTAGCAAGGAAGGGAGGAGTACACAA[CG]ATTTCCCAACTAAGTGGTTAGAGGAACACACCAGGAACCCTGTAATGCATGGGTATCCCA	0.401193	0.33371	0.333177	0.462606	0.293159	0.0911143	0.137469	0.098601	0.151038	0.124391	0.387983	0.369777	0.440418	0.348133	0.131068	0.813673	0.813771	0.794034	0.816125	0.801726	0.816692	0.805334	0.768626	0.810822
cg12205230	TPM3	CTTTGGCAATTCTAGGTTGGCAGTTTGCATCCAGGGGGTCCTGGTTGCCTTTCAGCTTCC[CG]TTTCACTCTCCCCCAGACTGTGTTGAATGCTGGTCAAACTCCGTTAGTTGAGTTTTAGCT	0.388115	0.479424	0.501368	0.499028	0.457099	0.366305	0.145435	0.173999	0.176807	0.507859	0.478648	0.472506	0.493886	0.466579	0.724552	0.810528	0.806511	0.830735	0.798879	0.801203	0.808031	0.787698	0.751306	0.805495
cg27312652	SIM2	GGGCTGCGCCGGCCTCTGGAGCCCCGGGAGCCAGTGCCGAGGTAGGGAGACAACTTCCGC[CG]CAGGGCGCCGGACGGTCGGGGCAGAGCAGGCGACAGGTGTCCCTAGGCCGCAGGGCGCTT	0.503528	0.415233	0.554475	0.466838	0.558633	0.199987	0.175955	0.225375	0.317082	0.598348	0.427997	0.551698	0.483441	0.524072	0.800055	0.125523	0.128227	0.125979	0.128311	0.115756	0.122841	0.123594	0.122305	0.121019
cg12210293	GIMAP1	CTTCTTGTGGCCAACTTCAGAGCCTGTCACCAGGAAAGGTGAGCCTGAGCCTGGGAGTGG[CG]GGGGCTGGGGGTGCTCTGAGAACCAGAAAGAACATGATTCCTAGAGTGTTTACTGCCTGA	0.493331	0.491519	0.500004	0.495239	0.538088	0.331273	0.257643	0.236013	0.359093	0.206732	0.491507	0.513377	0.529487	0.511269	0.39707	0.765016	0.747851	0.809322	0.761169	0.753234	NA	0.724907	0.680843	0.760329
cg03191919	UBXN7	TTTCCACTTCATACTTTTTCAGAGGCTTTCAGCCTTTCATTTATTTCAAAACCAGAGAAT[CG]ACCTAGCTTTGATAAAAATGCAACTACTTAATTTAGGCAATGGATAGCTCCTGACAACAC	0.494221	0.375499	0.420704	0.487499	0.451673	0.199925	0.189493	0.201794	0.216001	0.388355	0.273912	0.404098	0.434342	0.350105	0.189858	0.781042	0.798118	0.795072	0.786636	0.796789	0.789721	0.762633	0.747088	0.784978
cg04421583		AAATGTGGAGAGAGGGGAGGGTACTGGAAGTTGGTAATCACATGTGTTCAGTGACAATCT[CG]ATGTAAGGGTCCAACAATTGTATTGTTCTTCACACATGAAAGGGACATTCAAGGGCCCCA	0.526499	0.486185	0.579329	0.512107	0.547793	0.222586	0.308992	0.287983	0.345589	0.182944	0.56571	0.592508	0.527957	0.569186	0.292517	0.841694	0.821593	0.801279	0.841773	0.816967	0.802411	0.840274	0.768782	0.837362
cg07725033	LOC285629	GATTTCTCTTCAACAAATTATAGCTACTTTGTCCCTTATGACTCATTGCAATATTTTCTT[CG]GCTTTCTACAAGACTCTTTCTCTTATTTTCTCTGTCCCAATTGTCTCCTCACTGTAGAAG	0.582447	0.638279	0.652131	0.656596	0.600497	0.446331	0.397431	0.408235	0.309681	0.160655	0.66784	0.594101	0.655659	0.702523	0.18675	0.890546	0.863345	0.858266	0.8823	0.881436	0.849545	0.875008	0.835733	0.888031
cg08141956	RCC2	CACCAGGGCTCCTCACGTGGCAACCCGAAATAATCGCCCAGGCCAGGGTTTCCAGAACAA[CG]TTCATTTTCCGTAATTTTCTCATTTTCAATAAAGGCATAATCTTTAAATGTGAAATTGAA	0.53332	0.527514	0.55455	0.49777	0.465302	0.213669	0.232494	0.2329	0.409604	0.144199	0.497056	0.551332	0.509062	0.448138	0.210287	0.79906	0.804426	0.817352	0.801258	0.824409	0.812437	0.833207	0.756012	0.831014
cg20706711	SLC6A19	CTGAGGATGGTAGTTTGGGATCTGACATGGCCCTGCTGGCTAAGGAGACAGTGGCTGGGT[CG]GGAAGGGAGGCGATGGGGATGGAATGGAGGGAGCTCAGGGTGTAAGAGATTTGGTGGGAG	0.479436	0.416521	0.467876	0.433367	0.535942	0.129049	0.198423	0.266345	0.279142	0.51181	0.401657	0.484062	0.424415	0.445813	0.5191	0.838867	0.834529	0.827764	0.825363	0.833301	0.815556	0.826538	0.759257	0.834622
cg13895046	TMPRSS11F	CTTCTTGACATCTAGCAAAAGCACTAATCCAAAGTAAATGAATTTAAACAATACAAAATA[CG]CAGGAGTATCAGCTCTGTGTGCCATGTGTATAACTCATGGGCAATCCACACTACATACCA	0.608308	0.564408	0.619059	0.6613	0.609156	0.185681	0.395629	0.189694	0.461101	0.426901	0.588595	0.617967	0.62244	0.578443	0.532805	0.855011	0.838349	0.845642	0.845901	0.855471	0.831573	0.865299	0.826214	0.846855
cg03328485		GCAAGCAGGCAAAACTAACCTATGCTGTTCAAAGTCAGACAATGCCTGTTCTGGGGGTGT[CG]AAGCATGATAGAAGAGAACATGAAGAATTCTTATGGAGGGCTAGTAATAGTTTTGTTTCT	0.631042	0.608563	0.651851	0.639066	0.564513	0.276698	0.455338	0.414655	0.385699	0.210153	0.639926	0.637112	0.658333	0.644147	0.387384	0.853175	0.866806	0.850406	0.852646	0.855098	0.871399	0.831513	0.852996	0.871119
cg25398315		TGAACTCGGTTCAGAGGAATGGTGGCTAATTCTTATGTGTAAAGTGGATCTTCCCAACCA[CG]AAAATCAGGGTCATTGGAACCACAGGCTCAGTCATGTCCCTGAGGGTTGCCAGATTGCAG	0.423218	0.369362	0.385421	0.403236	0.416484	0.158233	0.240625	0.185555	0.159814	0.155701	0.391102	0.416944	0.386281	0.408436	0.197785	0.757022	0.785198	0.746456	0.759217	0.760549	0.747841	0.683204	0.609038	0.709207
cg19038490		GCAAGGTGAAGGTAAGTGCCCTTTCGGGAGGCAGATGGGGTTGGTGGGGAGGAGGCTGGA[CG]AGGGTGAATAGGAGAGAGGGGACCACCATGTTCAATTGGGACAGGAATGGAAGAACTGTT	0.500727	0.527138	0.58585	0.57066	0.562236	0.352014	0.313725	0.283798	0.37668	0.18373	0.576191	0.590901	0.591336	0.555735	0.285402	0.809526	0.782288	0.825465	0.818571	0.81513	0.779641	0.783973	0.768246	0.812326
cg11371231	OR8K5	AGTCCAGTTTGGTCAAAATGATCATAGTTAGGTTGCCCACCACTGTGATTAGGTAGATGA[CG]AGGAAGACTCCAAAAAGGGGAATCTGCAGCTCAGGCCGCCTTGTGAGTTCCATCAGAATG	0.453682	0.479244	0.487589	0.497536	0.42686	0.1989	0.222864	0.14624	0.22161	0.302014	0.477072	0.486802	0.485066	0.513989	0.135463	0.880173	0.891537	0.830929	0.863854	0.860502	0.875836	0.866318	0.821204	0.735898
cg20594286		ACTTTTTCAACCATCCAAGTTATTGTGTGTATCATTAGTTTTCACCACTGATTAATATTC[CG]TGGTACATTTAACCATTTACCTGCTGAAGGACATTTGGAGTGATTTCAGCACTGGGCTAT	0.379089	0.396917	0.413828	0.492004	0.433042	0.125395	0.170402	0.131309	0.156131	0.476549	0.434223	0.411922	0.501998	0.415022	0.48279	0.690577	0.679996	0.750872	0.747249	0.758579	0.730611	0.706475	0.721834	0.685558
cg06710785	NRG3	CTGAGTGAATGCAGTGGACAGGATACAGGCAGGTGATTGGGAGCCCAGTAGGACTGACCC[CG]GTGGGATTAGTAGAGAGAAGTAGTGGGAGATAACTTGGGGTCATGTTGTCATTCACAGTT	0.43226	0.555266	0.557207	0.508933	0.504269	0.222601	0.320008	0.26742	0.351517	0.20313	0.547523	0.514463	0.576295	0.535178	0.227685	0.8811	0.835072	0.82908	0.841573	0.831156	0.842319	0.870914	0.817005	0.856784
cg19457909	BCAS3	CTCTTTTGTATTGTTTCTGCATCGTCCTGTCAAACATCTGGAAACCAGCATATTGGCAGT[CG]TCTCACAACATGATTTTGCATTTACATCATCGTGCTAGCTGGTAGAATTTTTTCCCCCAG	0.464502	0.450604	0.353786	0.364994	0.2904	0.232016	0.1098	0.173511	0.11414	0.578459	0.346993	0.378258	0.380638	0.303788	0.5965	0.859293	0.840199	0.871181	0.859349	0.842642	0.849966	0.863057	0.813536	0.876607
cg06473675	ASB18	GACTTGGAGTGAAGCCGATGGCTCTCCCTAATGTGTGTGGGCCTCCATCAATCAGTTGAA[CG]TCTGAATAGAACAAAAGACTGACTTTCCCTGAGCAAGAAGGAATTCTGGCGGCAGACAGC	0.438421	0.367547	0.385505	0.366526	0.43004	0.0803057	0.189759	0.0995658	0.21802	0.112472	0.406852	0.385345	0.375244	0.432606	0.228509	0.738821	0.743275	0.787445	0.761316	0.723313	0.745741	0.754974	0.654069	0.739026
cg10034578		AGACCAAAGCAAAAGCCCAACAGCAACTGGTGGTTCTGACTGAGGTGACTTTTAATGTAT[CG]TGAAACCAGTAGGCCAAAAGCAGTTAAAGTTGAGCAGATGTCCTCAGTCATGGGTGGTTA	0.56406	0.536297	0.51075	0.554085	0.598383	0.294357	0.257412	0.175949	0.181177	0.205882	0.558467	0.531763	0.517008	0.559853	0.336117	0.810359	0.810952	0.82047	0.805553	0.794391	0.786605	0.779367	0.755603	0.79709
cg10440696	OR52N1	CAAGGAAGACATACATAGGTCTGTGTAAGGCCTCATCACAGTAGATGAGGTACATAAGGC[CG]AAGTTCCCTGTAATAGCAATGCTGTACATGGTACACAGTGGGAAGGAGATCCACAAATGC	0.516867	0.492511	0.463706	0.533424	0.492684	0.19005	0.248906	0.101949	0.331453	0.332344	0.533871	0.523134	0.546519	0.480456	0.443461	0.838565	0.83283	0.842984	0.806598	0.830413	0.805328	0.81215	0.732523	0.840697
cg14430698		TCCTTCCCTTCTCTTTCTCACATGTGCTGTCTTGCCCTTCCACCTTCCATCATGGCATGA[CG]AGCAAGAAGACCCTCACAAGACACTGGCACCTTGAACTTGAACTTCACAGCCTCAAAAAC	0.461539	0.561524	0.553117	0.499633	0.516105	0.18312	0.33497	0.236633	0.2147	0.152573	0.567156	0.540787	0.520327	0.549698	0.152215	0.803237	0.811442	0.817398	0.829431	0.827444	0.789451	0.807786	0.764559	0.801655
cg07037963	SLC22A7	CCAGCTACCTCATCATGGTAGCCTTGGTCCCTGAACACTAATGGGTAAGCCCCAGAGCCA[CG]AGCCAGTGACCTCTGAATGGATGGCTTCCCCTTCCCCCAGGCACCAGGCAAGACAGGTAG	0.476372	0.415936	0.421773	0.493824	0.396734	0.137	0.272668	0.238915	0.150824	0.219634	0.440823	0.462819	0.514872	0.379967	0.391209	0.767485	0.754513	0.773373	0.739957	0.767786	0.736064	0.752828	0.698413	0.756539
cg16415875	TIMD4	CCAGAACTTCCTGATTCCAAAGCTTATGGTTAATCACTACATTGTCCTTTGACCTGTGAC[CG]TTTGGGTAATGTATCCATATGATGAGGCCTACCTGTGGCTAGCTCCTACTTAGTACCAGG	0.609205	0.594463	0.608775	0.567517	0.517248	0.24527	0.364346	0.238014	0.255353	0.408995	0.580821	0.599536	0.560766	0.606659	0.319371	0.861147	0.866242	0.844881	0.859518	0.852928	0.864879	0.882166	0.824425	0.890481
cg22408108		GGGCTTTAGAGGCTGCCCAGATAATTGGAGGCATCCACTGTGTCCCTGGGGGTCACTGGT[CG]CCTCTGCACCATTCATCTTGCTGACAGACCCCAGCTAGGGTGTCTATGTAGGCTGAGCCC	0.380151	0.257135	0.3773	0.390831	0.305319	0.110899	0.153359	0.118979	0.155307	0.0913136	0.325324	0.410307	0.405256	0.293638	0.0927131	0.751587	0.733008	0.710299	0.726178	0.748067	0.718734	0.757773	0.691616	0.736604
cg10437900		ACTTTTTTAAAAAGATTAAATTGAATTTTGTTTTAAATATTAATTAAGCAAAAAAAAAGT[CG]AGTAGATGTTTTAATTCAATGAAATAGACAATAGGGCGAAAGGTAACATTACTCTGTTCC	0.63858	0.581531	0.585982	0.611455	0.569313	0.354636	0.474321	0.24535	0.446425	0.517501	0.569443	0.643711	0.610337	0.593515	0.522985	0.791851	0.748724	0.812601	0.753193	0.759876	0.751987	0.793306	0.771573	0.808008
cg14580085		TAATTATTCCCGACTTCACTTCCCTTTTACTCTGCGTTGCTTCACAAAGACGCACACACA[CG]CACACAGAAATGAGTCATATGTTCAGCTTTCTGAAAGTCAAAGAGAATAAACAGATGCCA	0.508042	0.425407	0.436854	0.371596	0.354576	0.156158	0.162631	0.202363	0.198669	0.204511	0.417192	0.449414	0.365992	0.390578	0.137837	0.841651	0.782808	0.771863	0.795429	0.84609	0.803189	0.841241	0.781379	0.813943
cg20972294	OPCML	AAAAAAGCAATATTGACCAAGAAATACCATATTACCCTTCACAGACTCATTCTGATAGTT[CG]TTCTTCACCCATATTTATTCAAAAGACCTAAGAATCTAGCTATTTACTATGAGAAACTCA	0.466988	0.411869	0.499972	0.546946	0.55965	0.180672	0.130323	0.117582	0.357544	0.106137	0.505037	0.544782	0.568803	0.621684	0.210611	0.891189	0.861201	0.867237	0.847089	0.877442	0.868496	0.868349	0.861328	0.874428
cg13205848	ANO2	TTTGCTAATCATCTTCCTGATCTGTCTGCATGGTTTAAACTACAAAATGTTAATGCCTGA[CG]TGATTTCATGCCTCTTTCTCAGACCCATAGAGAAGCCTTGGGTTTTCCCTCACCCTTGCC	0.496499	0.452933	0.351193	0.382833	0.457246	0.246204	0.229792	0.254395	0.075395	0.1607	0.446935	0.374294	0.400625	0.510534	0.077275	0.818499	0.847441	0.820977	0.811152	0.846228	0.790463	0.821077	0.78176	0.801566
cg15255797	GIMAP8	ACGCGGTGCTGGAAAAAGTGCAGCAGGAAACAGCATTCTGGGGAGGCAGGCCTTTCAGAC[CG]GATTTAGTGAGCAGTCAGTAACCCAGAGCTTCTTGTCTGAGAGCAGAAGCTGGAGAAAAA	0.578149	0.489444	0.572552	0.555749	0.535714	0.151798	0.369421	0.253959	0.280185	0.278784	0.552456	0.602543	0.595169	0.555086	0.302204	0.819242	0.834179	0.825054	0.811751	0.807523	0.7908	0.818855	0.767841	0.801247
cg00547365	NOL9	TCCTGCCCCAAAATCCAACCCATCAACAAGTGTTGCCAACTGTATTCCTGAAGTTATCCA[CG]TCTATTTTCAGTTTCTGCTTTCTCTCGAGCCTTCACTGCCTCCGCAGGAGACTCCAGAGA	0.539287	0.434938	0.500276	0.53483	0.456176	0.136824	0.337393	0.127447	0.113675	0.211981	0.465394	0.505898	0.550891	0.427535	0.385317	0.833003	0.82408	0.839788	0.82841	0.834748	0.81544	0.818241	0.773709	0.832763
cg11135108	PBXIP1	CAGCGGGGTGGGGGTGGGGGGTTGCCATCTACGCCGTTTTAGTGTGAGGGACACTGGGAA[CG]ATGCCCAGAGGCTGCTCTCCTCCCAGCCTCAAAGGTTGTCAGCTCCACCAGAGCAGGGTC	0.374569	0.315245	0.314889	0.257499	0.381762	0.0927772	0.142104	0.115457	0.0766351	0.625366	0.277559	0.336035	0.254908	0.33562	0.511269	0.694868	0.681267	0.771012	0.714852	0.717662	0.684882	0.71229	0.649746	0.744215
cg06773116	KCNIP4	AGAGAGAAAAGGGACGTGCTGCAGGGTTTATCAGAGAAGCCAGGCAGGAAGGATCAGGGA[CG]CAGCCATCCACTCAGGCAATCACAGGCAGTGGGTTGGGACCCCCGAAAGGAAAAAAAAAG	0.558657	0.448192	0.553492	0.559693	0.561508	0.246546	0.187491	0.344966	0.310066	0.335023	0.480969	0.572428	0.557067	0.555208	0.421425	0.855526	0.843073	0.831942	0.854906	0.858724	0.857055	0.849629	0.831248	0.872268
cg16424196	FAM150A	ACGCATTTATTGTTGGATAATTAAAAAAAAAAAAACCCACCCAAGTTACTTACAAGCTGG[CG]TTGAGCACTCCCTGGTATTGTAATAGAGTCGGTGGAAATGTTTGCTGCATTCTGGTGAAA	0.573304	0.568966	0.522768	0.610557	0.608738	0.449994	0.431032	0.327305	0.295281	0.286066	0.583542	0.558219	0.59323	0.604325	0.491598	0.848017	0.84658	0.836081	0.85661	0.847307	0.839951	0.849649	0.799004	0.851263
cg14044388	ROR2	GCCACCTGCTACATCTGACCCCTGCAACTTGCAGGCTCCTCCAGCTTGGCCACCTGTGCA[CG]TCTCCTCCGGGGAGTGAAGGGGGTCTCTCAAGCTGTACTGGGCCAGGCACTGATGCTCAG	0.603776	0.567327	0.621783	0.620311	0.631631	0.131895	0.494877	0.307458	0.186711	0.208148	0.563456	0.671414	0.636483	0.617397	0.200448	0.835118	0.816944	0.861735	0.823163	0.838781	0.805144	0.817123	0.794763	0.859943
cg09521647	AFF3	CCCGCCAAAAGGGAGTCCCTTCCAGCACTCTCCCCTTTGTTCCTTTTTCTGGGCAAGAAC[CG]CTGACTGGGGCTGCCAGAAATGTAAACCCTGGGTGCAAGTGACGGGATCCCTCCAGCGTC	0.499875	0.40021	0.58325	0.56239	0.518764	0.377422	0.241627	0.228348	0.130605	0.648683	0.403395	0.602827	0.557971	0.48493	0.470213	0.0702137	0.0814666	0.0701393	0.071513	0.080195	0.0817643	0.0761336	0.0904798	0.0670131
cg14311250		ATTGCCCTTGAACCATTACATGAGTAATTCTTTAAAGTCCTGCTCTGTCATTGCTATAAC[CG]TGGTATGCATATTTTCTTTAAGATAAAAATGAACAATTTATGAAAAAGAATTTCCTCCCT	0.617905	0.618912	0.645782	0.609003	0.574125	0.327928	0.511431	0.439528	0.363838	0.343934	0.568865	0.653721	0.593657	0.618401	0.330084	0.843104	0.877483	0.82769	0.864412	0.847662	0.826212	0.859754	0.814986	0.900913
cg15593510	OR10T2	ATGAAAGGATGAATAGAAAGCCATACATGGGAGTGTGGAGAGTCCAGCTGAAGCGAATAA[CG]GCCATGATGGTCACATTGGCCACCAGGATTGTCAAGTATAGGAGAAGAAAGATGACAAAA	0.588591	0.570103	0.57707	0.642574	0.53745	0.310636	0.348788	0.150517	0.429586	0.190608	0.58282	0.598338	0.654117	0.584746	0.374198	0.885698	0.873381	0.888923	0.867669	0.88849	0.871432	0.877776	0.826555	0.900439
cg07784084	LRRC3B	AATAGTGTGGACAGGGCTGGAACCTTTACCACGCTTGTTGGAGTAGATGAGGAATGGGCT[CG]TGATTATGCTGACATTCCAGCATGAATCTGGTAGACCTGTGGTTAACCCGTTCCCTCTCC	0.573433	0.519819	0.576715	0.576784	0.614817	0.204721	0.393763	0.265219	0.439304	0.208855	0.561333	0.595936	0.600317	0.573232	0.273267	0.835364	0.81136	0.824183	0.821677	0.84223	0.805909	0.806559	0.77834	0.820743
cg03276000	DPP6	GACCCTCCCGACTACTCCTGTGCCCGTTGCCATGCCATTTGTTGGATCACTTGCAGGCCC[CG]AGTCTCAAACACATGATTTATCATCAGATCGTACAGTCGTCAGAAGGGTCCCACCGTTTC	0.619265	0.580621	0.582955	0.569434	0.655656	0.340466	0.323374	0.392684	0.390002	0.231456	0.571459	0.555709	0.588614	0.594181	0.416249	0.857908	0.859633	0.842602	0.835104	0.892597	0.826201	0.869845	0.819305	0.866509
cg11701615	C20orf166	CACGTGTGGCCTGATGGTGCTCCCTGGGGATCCTGCTGCTTTCCTGGAGACACTGGGACC[CG]GGGCTGGAGTCTCCCATGCGTGAATCTCTAAAGCTTGGCTCCCGGGCAGCAGCCAGGACG	0.334215	0.263896	0.342578	0.430519	0.317674	0.123436	0.135324	0.142264	0.104638	0.126406	0.268599	0.34773	0.450047	0.299148	0.0879742	0.773493	0.766854	0.75354	0.797319	0.785016	0.773027	0.797458	0.703423	0.759297
cg19092343	CYP4B1	TTGGGGCCCCCTGCCTTCAGGAGGCTTGTAGTTTAGAAGGGAAGTAGGCATTACCATAGA[CG]ACTCCTAGAGGACAGTGCTATGTAAAAATGTGTGTCTATAAATGTTTATCATGCATGTAT	0.563795	0.559242	0.559767	0.610425	0.593596	0.19679	0.299179	0.340656	0.406049	0.189669	0.578392	0.601954	0.659651	0.597388	0.365019	0.817421	0.826803	0.824811	0.817403	0.838828	0.795178	0.822577	0.75197	0.801277
cg03565720	LHFPL3	AAGTAAAATAACCAATAACCTAAATTTCAGATGTTCAAAAGTACTGAGAGAGGGGAAACT[CG]GGCAAAGCCAGAAAAACAGAGTTGTTTCCACGTTTCACTAATGTGTTGGGTTTGAGATTT	0.546168	0.536104	0.523539	0.597935	0.526334	0.319109	0.277661	0.317343	0.205918	0.31909	0.5628	0.550542	0.64788	NA	0.313148	0.824345	0.805074	0.773988	0.787367	0.820616	0.807133	0.806265	0.751709	0.82446
cg00951599		TCTCTTGTGAAACAGACGGAGGGTTTTCATTCACCACAAGGGCAGCAGCAGCCAACAGGG[CG]AGTTTGGGCGGCACCACCGTGAGTCTGGAAGCCCGTGGAGGGTGCCTGCAGCCCTCCCTG	0.457324	0.360841	0.44879	0.450932	0.432401	0.180983	0.188898	0.150004	0.293508	0.137654	0.394111	0.455334	0.453867	0.423212	0.193008	0.682578	0.722743	0.530418	0.719825	0.733981	0.685879	0.71876	0.678638	0.748734
cg04094178		TGGAAAATGAATAAATGACTTCTTCATCTCCAAAGTATCAAGGTGGCTGCTCCCTTCCCA[CG]TTTCCTTCCTAAAGACAGAGGTGGACAAAGACTCAGTGTCCTCTGTGGGGGCTTTTATGG	0.468223	0.396215	0.445606	0.481754	0.355158	0.162507	0.183117	0.1575	0.210418	0.0976481	0.459238	0.46297	0.47901	0.452428	0.0799481	0.745879	0.808725	0.637374	0.701387	0.802908	0.818246	0.825242	0.750478	0.835478
cg27584713	PHACTR1	CATTTCATCACAGTATAAATGGGCAAATCCATCACTTCCCTCTGCTCAGTGCTCTTGAAG[CG]AGATTGAAGGGAAAATTAGAAGCTGTTCATTTGTGCTTGCGGGCTCAGAAGCGTCGCACT	0.511401	0.430418	0.494786	0.538767	0.423683	0.290892	0.248089	0.258997	0.270761	0.145793	0.454668	0.510945	0.569927	0.474084	0.317599	0.822533	0.788951	0.795191	0.772663	0.778603	0.765202	0.80915	0.778642	0.793052
cg12629008	DAB1	CATTCAAGTCAACAGATAAGAAGGAACTGCAATCCAGGTTCAACATAGAATGAATCCCAT[CG]AGTTTATCCATTTCCACAGACTGAAAGAAGCTAGAGGCAAAAAGAACATACTATGTTATT	0.494491	0.438372	0.542306	0.530857	0.429868	0.16123	0.229672	0.121771	0.263072	0.250122	0.536026	0.533951	0.533227	0.508136	0.211431	0.840325	0.873265	0.82864	0.816667	0.849258	0.841008	0.844073	0.794566	0.864409
cg09834172		TGGAATTGGGCAACATGACAGCACCAAGTGACCTTCTGTATCCATAGTACATTACAGAGC[CG]TTTCCCCACTTACAGATTGTATTTGGTTTTTAGAAGTACCCGGTGAAGCACATAGAGAAA	0.409283	0.279502	0.387425	0.286145	0.222002	0.0976284	0.0941121	0.0913041	0.117815	0.198869	0.326621	0.416741	0.289234	0.271013	0.340381	0.85765	0.855076	0.857689	0.860459	0.858672	0.845482	0.86853	0.7851	0.812498
cg05833351	CUGBP2	TGCTGTTTAATGTTTTCCTGCCTCCCCAACCGGGCTGCACGCCAGCGGTTCTCAAAATCA[CG]GCACCGCTTGTCTAACAACACCGAACGCTGGGCCCATCCCCAGACGTTCCGATTCAGCGG	0.404285	0.264813	0.394956	0.52691	0.350776	0.136692	0.200428	0.0678412	0.0654119	0.544808	0.289725	0.39123	0.601804	0.228031	0.705709	0.944774	0.963603	0.954478	0.951833	0.964774	0.934539	0.95211	0.956604	0.962963
cg26378984		TCTCTAATACCTGCTACAGCACCTCACCCACAATAGGGCCTCAACTAACATTCACAGACC[CG]AAGCCCTGTCCTGGGGTGACCAGCTCAGCCTGGTTTGCCCAGGACTCCCTCACTTTTAGC	0.565846	0.522761	0.624226	0.593898	0.565323	0.229142	0.309175	0.25158	0.348737	0.136706	0.563503	0.643874	0.594578	0.582598	0.321126	0.841094	0.840673	0.829579	0.864554	0.818082	0.842262	0.844542	0.799795	0.827056
cg08453008	KLHL3	ATTTCACCACCGCAATCAGATGACAGATATGCCACTGGCAAAGCTGCATTCACAAGCAGC[CG]TGGCCACCCTAAGTGGGGCAGTAAGAGGCTTCATCTACCACGTGACCAGCACAAACTAGA	0.55656	0.432362	0.418879	0.453621	0.492585	0.302522	0.111738	0.128181	0.105383	0.118118	0.443274	0.422776	0.444681	0.457658	0.167269	0.869928	0.856727	0.864068	0.836721	0.86043	0.848204	0.851471	0.793743	0.843316
cg08171885		TTAGAAGGTAAATTTTCCTGCAAAAATCCATCAAAATGAAGGGTTCTCTCCATTGCAGTT[CG]TAAGTAATACTGACAGGCCTGAGAGCAGAAATCAGAGTCTGATGAAAGACCAATGTTTTG	0.70706	0.735175	0.737367	0.741526	0.737241	0.435284	0.517017	0.549001	0.46495	0.273086	0.756329	0.784247	0.732882	0.764123	0.418096	0.895406	0.833966	0.836046	0.851831	0.857698	0.866151	0.875573	0.839151	0.872168
cg04931126		AAAAAACGCCCTTTGAAGTTGAAGAGAGCTTCCCCTTTCAATAGTCTTCATTATCCAGGA[CG]CCAAAAAAGAATAAGTGCCTCCCAAACAACTGAATATAGGAGCTGTGTCTCCTCTGTGTT	0.442646	0.436071	0.454792	0.507371	0.406354	0.144238	0.102149	0.161644	0.14573	0.176396	0.421085	0.448514	0.531887	0.437615	0.127154	0.20844	0.249663	0.233988	0.228567	0.181616	0.195359	0.192734	0.221373	0.162652
cg25714096	ORC2L	GTTGAATAGATTTAAAACAGGCCAAGAGGGGTAAAATTTTCCAGGTAGAAGGTCCAAATC[CG]TGTAACAGCTGTGTAAAATGCCAAGCATTGGGTCTGTTATTATGAAGGGCTTAGTTGGCC	0.370705	0.337645	0.424729	0.419954	0.399052	0.152962	0.265329	0.125748	0.166192	0.57234	0.368178	0.411758	0.417162	0.345144	0.812247	0.699376	0.649943	0.692833	0.664094	0.640576	0.631093	0.614422	0.638244	0.668844
cg09102329		GATGATTACAGAGCCCTTAGCCTTCTGCCTTGAGGGATGGACCTCATCTCTTCAAATTCA[CG]TTCTGATTAAAAGGAAGATAAATGAAAACTATGTTCTTTTTTCTTTCCTGCCCATTTCTA	0.567092	0.489291	0.533274	0.562963	0.576795	0.197006	0.318718	0.201225	0.191546	0.21202	0.52023	0.558611	0.562564	0.541277	0.277338	0.810439	0.794855	0.799704	0.798925	0.824954	0.76518	0.793483	0.763328	0.817641
cg14215666		CATAGAAGCATATCTGGCTTGTGTTACCTGTTAACACAAAGGGCACACCTAGCCACCCAG[CG]GATCTGAAAGCTGCCAGCTAAAAGGAATACAATTAACCTAGTGTGATAGGGCACTGAGGG	0.49132	0.385621	0.497229	0.497664	0.451805	0.302495	0.145361	0.19283	0.272832	0.132137	0.466486	0.484578	0.485058	0.461204	0.22133	0.682238	0.692723	0.627149	0.665369	0.664118	0.690199	0.763098	0.752371	0.797302
cg26599630	AJAP1	CTGGTTGTGAGTTGCTTCCCAGGCTGCAGACCTCAGATGCTGTGGCTTCCTCAGGGGCTC[CG]AGCGTCCACCTAATACGTTTGCTGGGTTGCGCTCAGGACTGTGATCCCTAGCAGAGTGCC	0.289239	0.35928	0.426476	0.325424	0.369483	0.0697175	0.222717	0.190147	0.118837	0.597128	0.388604	0.420849	0.356511	0.395537	0.650719	0.752155	0.74469	0.894332	0.815759	0.762894	0.752616	0.71534	0.714483	0.654499
cg22940372	RYR2	ATGAGGGTTGGTTGGAGTCGTCCTGGTTGTCAACCGGATCAGGAGCTTGGCTCAGATGAA[CG]TGCCTTTGCCTTTGATGGCTTCAAGGTGAGTGGACTTTGTCCTGTGCCAGTCATCTGTAC	0.562394	0.435622	0.507008	0.547144	0.523467	0.288556	0.187547	0.130174	0.157374	0.203016	0.511027	0.49082	0.512374	0.495042	0.310976	0.876681	0.886151	0.849787	0.844407	0.850082	0.845053	0.848924	0.801039	0.837589
cg19404723	DLGAP2	AGTTAAAGCTGAGAATCATTGGGACTCACTGCCTATGTCCGTGTCTAGGTGGGAGAAATA[CG]TGCATCTGTGGTCACAATGCTGCTTTACAGAAAACACTGGTTGTTCCTGAGGTTATTGGC	0.638644	0.614429	0.650172	0.658977	0.637758	0.407666	0.505204	0.422512	0.387109	0.465078	0.643799	0.671759	0.67148	0.650673	0.392497	0.798676	0.782371	0.803593	0.807965	0.790658	0.783266	0.807863	0.763104	0.790947
cg12255501		TCACAGGAGGGGACATCCAAGCTGACCACACTGGAGGAGCACAGTGCTTCCCAGGACCTT[CG]TATCTTCAAAGAAGTAAATGATATGAGAAAATTTCCTGGCATGTCCCTGAGCAGGAGGTG	0.580874	0.559334	0.583063	0.52581	0.611336	0.206155	0.35539	0.379428	0.192241	0.349383	0.568821	0.589054	0.547758	0.625694	0.196965	0.784321	0.814287	0.789224	0.823837	0.840798	0.815331	0.820523	0.767816	0.809749
cg09461792		CTTCTGAGAATTGTATCCTCTCTGTTTGTGAATCTGTTACTTAAAAAAAAGAAAACAATG[CG]TTTAAGAATCAGTACTAATAAGTGGCAGTGGAGTCATGCTGTCTGGCAAAAATAAAAAAG	0.433909	0.370425	0.403086	0.462582	0.256474	0.126064	0.159345	0.0987507	0.182875	0.122744	0.386144	0.414209	0.413783	0.287851	0.11387	0.875265	0.879722	0.857111	0.86181	0.867373	0.861845	0.862368	0.851616	0.862288
cg00927256		ATTCCCAATTCATTAAAATTAAATGTGTCACATCTTACAAGTGAAACTACAATTTTCAGA[CG]GAAAATGAAAACATTTTTCCCTCATATTTTGCTATTACTGTCCCCACAGTCTCACAGTTG	0.408931	0.386171	0.469028	0.481367	0.404054	0.255075	0.174928	0.217324	0.0968572	0.110818	0.431919	0.511897	0.461775	0.458445	0.272528	0.803205	0.803503	0.800835	0.788423	0.75861	0.748839	0.828262	0.726394	0.84583
cg10210690	C1orf175	GCAGACTCAGGGAGTCTAGACAATAACAACCTAGGAGGCACACTTAGGGAGCTGGCAGGA[CG]AGGGGAGGCAAAAAAGAGAGGGTCTTCTCAGAGTAACTCAAACCCACTGCCCAGCCTCGT	0.38794	0.329586	0.432525	0.44188	0.377176	0.104544	0.200781	0.225261	0.212682	0.212222	0.361487	0.452792	0.44659	0.384512	0.38449	0.189167	0.203438	0.186009	0.203299	0.187608	0.192634	0.116312	0.118331	0.126722
cg15704225		TCTCAGTTTTTCTTCCTTTGAAGACTTTTCCTTCAGAGATTTCTCCTTTTCTGCTGTATT[CG]AACAGTCTTTCTCTTCTTGGAAAGATCTGCTGATATCTTTGTTCATGCCTTTGATTCTCT	0.629108	0.501751	0.549658	0.570654	0.556425	0.168112	0.339544	0.166461	0.425732	0.247625	0.482626	0.533737	0.505672	0.531721	0.341769	0.847356	0.861524	0.81504	0.883517	0.8464	0.852186	0.845614	0.833361	0.877849
cg03437887		GCGGTTTCCAGGAGGAAAGCTATCAGGCATCCACATGGAAGGCCAAATACAAAGGATATA[CG]AGCCAAAAATGAGTTGAGAAAGAAAAGGGACCTGGCTAAAGATGGAAACACTAAGGAGAG	0.364041	0.3188	0.471637	0.344346	0.32728	0.11897	0.117336	0.136226	0.152257	0.101547	0.390215	0.41217	0.348606	0.395832	0.0866184	0.803905	0.810954	0.774197	0.810975	0.777257	0.788176	0.725036	0.742031	0.772026
cg06192085		GGGCCAAGGACACAGCCGGTCCCCACGCCAGGTCCCCCGCACCGCGGCAGCTAACGGGGC[CG]GTTCAGCCCTCATGCAGCAGTGGGGGCGTCTTCTGTTCTGCTTGCCAGGTGGGCATGGCT	0.497962	0.51126	0.516841	0.556529	0.451479	0.299989	0.254016	0.343371	0.229178	0.498867	0.499727	0.522727	0.542888	0.451372	0.531299	0.817754	0.802216	0.795914	0.791456	0.816385	0.792629	0.820046	0.752001	0.837992
cg02335141	CCR6	TGATAGGTAGCATTTTCCAGCACTTTGCAAGGAATGTTTTGTAGCTCTAGGGTATATATC[CG]CCTGGCATTTCACAAAACAGCCTTTGGGAAATGCTGAATTAAAGTGAATTGTTGACAAAT	0.578561	0.59693	0.601978	0.608868	0.644476	0.298215	0.319284	0.283168	0.13087	0.264943	0.630853	0.608391	0.655516	0.644886	0.366984	0.79941	0.793213	0.803558	0.788768	0.803452	0.760991	0.788006	0.761632	0.807244
cg24200753		TAAATAAGCTCTAGATATCTGCTGTGCTGGTGGGAAACTTAATCAGAGGTATGTGGACCA[CG]CCCTCCACCCAGTGTTATGCAAAGGTTCCCAGGTCTTAGGTAATATCTGGAAATGAGGAA	0.349533	0.352016	0.422882	0.364919	0.334315	0.127861	0.174962	0.109141	0.148821	0.116875	0.40991	0.453466	0.42431	0.380099	0.16035	0.73191	0.769038	0.753304	0.774127	0.759011	0.744108	0.707576	0.627616	0.748698
cg02449336	OR2A2	TCCACCACTGTGCCTCCTGCGCTTAGAACAGTGGCTAAAACAGATCATGCACTCCAGGAT[CG]TTTGTTAAAGGATGGATGAAGTACAAATTGACACTGGATAATATTGTTCTCTTATCGAAT	0.399561	0.337663	0.348313	0.409491	0.505407	0.11984	0.248145	0.120152	0.228929	0.20709	0.401085	0.34723	0.414842	0.51186	0.360187	0.822981	0.808813	0.814789	0.799644	0.834375	0.803615	0.801254	0.785193	0.805717
cg16164144		AATAAGAACAAATATTAATTTCGCTCACAGGTGTGCAACTAGGGCAGGGGATGGGAGAGT[CG]GGGTATTTTTGCTCCACAGGATCATTTGGGGTTGCTTAATTGGTATCTGGAAGGCCCAGG	0.651563	0.668663	0.663977	0.663402	0.698139	0.527974	0.431335	0.341071	0.40409	0.305061	0.72601	0.729399	0.733302	0.734111	0.553357	0.843213	0.836251	0.827648	0.857438	0.857545	0.818877	0.840026	0.795437	0.83705
cg07300384	KCNIP4	GTTAATAGGTAACTAGCCTCCCCGAGATCAGCATGCAAGGTGTCAAATATAAAGCATCAG[CG]CAGAAAACAATTTAAATCGAGGTTCTACCATCTTTATAACAGGAATCTGGCAAATGTATC	0.669166	0.653094	0.72127	0.66351	0.668019	0.446924	0.333134	0.444293	0.389873	0.485115	0.682093	0.710464	0.701753	0.727985	0.431162	0.88594	0.852336	0.87829	0.859024	0.876795	0.882926	0.844777	0.851998	0.882532
cg15493035	FAM160B1	GTAAGAGGGATTCCAGAGTCTCTTATGTCCTCAAAGCTTCAAGCTCAGCCAAAAGAATCT[CG]ATGGTTTCCACAAAAAATCTTGGGCCTTGGATCAACTGCCCACCCTTGAACCAATCCTGG	0.611917	0.645447	0.647133	0.640148	0.643591	0.401843	0.528076	0.466513	0.299241	0.221983	0.675438	0.689445	0.670586	0.647424	0.430582	0.834438	0.836042	0.841792	0.806348	0.827509	0.813325	0.823168	0.768666	0.82692
cg07122986		CGTACTGGAGAAGATCTGGAAGGAAGGAACTGGAGGATAAATACCCAGAGCTCTCCTCCT[CG]CCTCTATCATGTTGCTGGTGCTCCCCATTGCCTAGGTCCACCTGGAAGACATAGTGCTGG	0.522503	0.456866	0.478699	0.541476	0.442477	0.194922	0.332185	0.257076	0.174548	0.308833	0.492249	0.497669	0.557511	0.473756	0.141053	0.808166	0.818128	0.737788	0.781872	0.807578	0.787852	0.808922	0.741659	0.800561
cg27504861	CA10	ATCAACACCTTTTGCTTCCTCTTGATGGGAAGATGGGCTAAATCCACATGTGGAGTAGGG[CG]TGGCAGCTGCCCCAGAGGGTATATGTGGGATCTATGGTAATTTCTGTGAGGCATAAACCA	0.500193	0.444873	0.534757	0.488412	0.401904	0.192345	0.206256	0.171723	0.239485	0.10486	0.482226	0.544363	0.494768	0.480597	0.175862	0.832729	0.83418	0.831664	0.819816	0.842235	0.826609	0.819359	0.775294	0.845364
cg05462446		GGTAAAAACATAAGCTTGGAGCTATGCAAGACTTAAGGGCGAGAGCAAAGGCATCCTACT[CG]AAATATAAGATGAATGTCTACAAATGTGTGCTGGGCTGCTCTAAATATGTTGAAAACGTG	0.530399	0.425472	0.569378	0.437341	0.470202	0.267932	0.301038	0.163139	0.149404	0.205098	0.529702	0.572492	0.419654	0.490914	0.174794	0.870513	0.873504	0.904199	0.880482	0.895358	0.884603	0.855694	0.840966	0.857242
cg04509542		AGCCCCTTAATTGCTCACAGAGAAGTCACATAGGATTTTCAATCCTTCTGTTTATGCCAA[CG]CTTGGAAAAGATCACTGAGTTCGGATCTGTGTTGAGCTACCAGACTGAATCAGAGATAAA	0.452609	0.337297	0.36156	0.283956	0.295578	0.202689	0.0863943	0.0721514	0.0592981	0.0855352	0.274045	0.307434	0.221067	0.328985	0.0613319	0.813061	0.8108	0.802442	0.796852	0.794133	0.786721	0.784309	0.728376	0.802218
cg14927218		GGCTGTGTTGTTCAATTTCAGTGTATGTGCTGCCAAAGCGAGCACAGGCTGCCTCATTCA[CG]TTTGTACCCCGGCCCTTGGTACAATGCCTGACATGAAATGGGTGCTCACAGCTTGTTTGC	0.430397	0.314183	0.398245	0.441915	0.405462	0.0804428	0.192025	0.182307	0.182613	0.343325	0.299674	0.412791	0.460474	0.301932	0.18922	0.742382	0.73594	0.740098	0.744814	0.758084	0.716084	0.731487	0.687411	0.751854
cg02320356		GAAGCAGGGATTATACATATTCTTTTAATGTGGGAGGAGTGGGCTCAGAGGTGCTGGAGG[CG]TGTTCATTATTGAAAGAGTAAATTTCTTATTGAATGGGACTCCCACTGGCCCTATAGGCT	0.379032	0.334333	0.372076	0.413987	0.269489	0.14783	0.156853	0.100753	0.126234	0.095359	0.368706	0.37897	0.423741	0.329898	0.0740948	0.810733	0.78724	0.794261	0.763993	0.785424	0.762991	0.728231	0.668002	0.7343
cg20801645		GACTTGGGCACTTAGCAGAGGGTGCACGTGCCCGTGTGTGTGTGTGTGTGTGTGTGTGCA[CG]CACACCTGTCTCAGGGGGTACCTAGCATATACCCTGAGCAGATTTTTAACACCTGCCCTC	0.501425	0.444523	0.421957	0.436927	0.565094	0.167481	0.233846	0.169233	0.209449	0.681447	0.418036	0.446316	0.458341	0.433794	0.847764	0.848766	0.84615	0.830685	0.847025	0.83979	0.841538	0.841468	0.812074	0.871205
cg26720452		ATTGTCATCCTGAGCAAAGCACAGGGCTGAGAACAAGGAGGGAGAGGGAGGAAAGAGCCT[CG]GATAAGGCAGTGCTGGGGCCAGAGGGAAGGCTGCTGTCATCTCTCAACTGGGATTAGCTA	0.488568	0.426053	0.429489	0.489576	0.450004	0.194713	0.217975	0.364937	0.15409	0.160932	0.416638	0.434558	0.474825	0.41407	0.230895	0.7413	0.728095	0.760808	0.756862	0.724336	0.74109	0.675103	0.652313	0.710935
cg24431693		ATGATCATTAAGTAGAACAAAGGTTTTCTGGCTTCCACTGTGGTGTCCTTTACAATAGGC[CG]AAATGAAATCACTCCCAGTCAAAAATTCTAGGTTCTCAAACAATATATAATACGTCCTTC	0.529791	0.538539	0.625585	0.544847	0.577821	0.226822	0.357879	0.370311	0.418653	0.211783	0.583878	0.59627	0.516976	0.637897	0.290078	0.828256	0.872237	0.833902	0.791493	0.817287	0.832516	0.812342	0.792615	0.797269
cg21148923	HCN1	CACTGAGGCTGTGAGTAATCATTTTTTGGTCATATGATGCCCCTGGACACACTATAAATG[CG]TATACTGTTTTTCTTGTTACTCTGCCTGCTGTCAGTTTACCTTATAGACTCAAATTTATC	0.628673	0.540067	0.528949	0.599155	0.553466	0.150847	0.388103	0.250057	0.342197	0.278811	0.556817	0.577735	0.631395	0.564175	0.298129	0.868975	0.872366	0.888924	0.85781	0.873177	0.845802	0.864876	0.814326	0.843116
cg14016055		GCATGCCAGGAGGGTTTTGTCACATTTGTTACTGGGACCCGTTGCCCTTGTACATATTGT[CG]TTTAAGATTTCTTCCCACTCGTTCCCAGAGCTCTAGGTCTAGTGTGCCTTCTTCTGGGAA	0.538148	0.498644	0.511502	0.595948	0.604071	0.44904	0.271259	0.231206	0.160356	0.482783	0.464988	0.528217	0.572848	0.559043	0.490056	0.871946	0.872254	0.832532	0.845974	0.864063	0.874138	0.855542	0.821055	0.851753
cg06746274	MS4A13	ATTAGAGACAGGAAAGTCAAATCTTACTAACTGGAGAGTTTAGATAGTGAGCTGTGCCAG[CG]ACTCTGTAAAAGCTGTCAGAAGTGAGACAAGAATGCTAAGCAATGGAGATCAAATGCAGA	0.313259	0.373164	0.363662	0.309855	0.288336	0.0710918	0.154968	0.0673972	0.193062	0.0924313	0.388484	0.390374	0.318921	0.324158	0.0615374	0.800454	0.816049	0.79921	0.790598	0.769702	0.772123	0.755058	0.619095	0.743145
cg10589330		TGAAGTGGCAGAGCCCCAGGCTGAAACCTGGGCTTGTGCTGCCAGGATCTGCCCTCTGAC[CG]CTGAGTAAAGAATAAAGGGTTTGGAGCACCAACCCTAGGCCTGAATTCCAGTCCTATGAC	0.446477	0.353586	0.295683	0.373069	0.292378	0.119344	0.0948707	0.058813	0.0755404	0.0752045	0.36166	0.283353	0.344595	0.329	0.0775408	0.742707	0.739012	0.760506	0.758402	0.752119	0.723337	0.733339	0.712658	0.722788
cg06127294	ALOX5	TTCTTGTGAATGGGAATATATTAGTGGAGCATAAATATTTCTTTGGTATGACCCTCAATC[CG]TCTCTCATCTCCCAGTCTCCCCCTCTGAGCCATCTTTTCCCTACATTCTGCCCCCTCTTC	0.590691	0.448882	0.481928	0.490934	0.459541	0.144593	0.185121	0.20043	0.388435	0.283368	0.552073	0.492353	0.524693	0.529641	0.336898	0.865535	0.854756	0.880656	0.861798	0.875551	0.858098	0.883337	0.816465	0.848812
cg00969288	MYH4	CCATTAGCAGGGTTCCATTAAATGTTTTGATTCTGTGGAGGAGTCCTTGAAAACCACTGA[CG]TCAATCACAGTTGGCAAGAGCTGGAAGGACCTTAGCAGTCAATAGAATCCAGCCTCCTCG	0.640978	0.607509	0.661996	0.653148	0.615808	0.492606	0.313349	0.502862	0.380394	0.110421	0.628161	0.683465	0.672031	0.608997	0.286679	0.869723	0.847787	0.848801	0.829187	0.838732	0.832439	0.854267	0.794229	0.827346
cg27336068	ADARB2	AGTCCAGATGGCTTTGCAGCCTGTAAAACAGACTTTACTCACTGATGCCTCTCGGAGTGT[CG]GCAGGGCAATGTCTTTCTCGCAGCAGAAATGCAAAACAAAAGACAGCATCTGTGGCTTGC	0.657979	0.497873	0.622264	0.631526	0.587398	0.187492	0.111913	0.222212	0.14732	0.0865645	0.52618	0.63389	0.676153	0.601099	0.0961132	0.198932	0.210636	0.215444	0.190148	0.220564	0.165798	0.192093	0.231217	0.129076
cg14444287		TGCCCATGAAACCCTTATCTGGTCTCCTCCAATGTATTCCACACGCGGAAGCCATCATCA[CG]GGCTCGGGCTTGTGATTTGTAAACCTTGATCTTCTGCACTCCGTGTCCTAAATATGGATA	0.485108	0.435599	0.331803	0.499413	0.436374	0.151083	0.267968	0.15545	0.193409	0.362243	0.430613	0.341747	0.515735	0.423475	0.7649	0.845847	0.828868	0.805882	0.826623	0.827841	0.828894	0.85588	0.801477	0.859055
cg17946266	PHACTR1	CATACAGTATTTAGAATTGTTTATTTCCTTACATTTTGCACTTCCTTAAGAACCTGAACC[CG]AAAGTTGTAATCAATAGATTGGTTTACAGCCTGTTAGTCCTTTAAAAGTATTAACTTTCA	0.520294	0.520105	0.519444	0.613248	0.56189	0.21974	0.230971	0.190155	0.447226	0.174398	0.49915	0.55774	0.608714	0.517163	0.309279	0.820148	0.819131	0.831428	0.776569	0.812827	0.814953	0.811775	0.778504	0.809599
cg27642416		CCATTCCACCAAAACTAGCTACTTAGAGTCTCATCTCTCACTGAAGATTCAAAACAGAAA[CG]TGGATTTAGGGAGGCATGATGGTTCATCCTCTCTTGGAGCCCAGTTGGAAGTTGACTGAC	0.51603	0.477715	0.494432	0.527037	0.446594	0.352098	0.271718	0.228356	0.184011	0.130844	0.547487	0.521587	0.525066	0.511204	0.161209	0.76996	0.787598	0.79409	0.748918	0.764058	0.738068	0.734001	0.695419	0.768304
cg17707126	GSTA5	GTAAATGTGAATTTCAGGCAAACAATCAATAATTTTTTAGTTATACCTATGTTCCAAACA[CG]GTATGAAACCAGATTATACTGAAATATTATTTACTGTTTATCTGAAATTCACATTTAGGT	0.545461	0.531512	0.518637	0.609418	0.532056	0.272534	0.43097	0.292114	0.345602	0.319855	0.546224	0.560955	0.603141	0.568985	0.547535	0.809257	0.818986	0.801252	0.772681	0.801499	0.797192	0.790964	0.755845	0.808009
cg10596590	PKHD1	CCCTGTTCTTCCTTTAATTAAAAAACATGCTTATTGCAATACTTGCCAGAATCACTTTAA[CG]GTATTTTAATTGTAATGTCTCTGCCTGATTAAAAAAAGAAAATATGAACTAGAAAGTGTT	0.639217	0.645245	0.616943	0.674878	0.666996	0.353974	0.48099	0.343393	0.461313	0.666803	0.626727	0.639043	0.633522	0.692607	0.650673	0.85316	0.875202	0.793903	0.853535	0.851016	0.840383	0.871074	0.82141	0.901362
cg22693863	RFX1	CTCAGTTTCCTCAAGGGACTGTCTGGGTGCTGCAGGACGAGAAGAGACAGAAACAGGGCC[CG]GACTAGGGTGAACATCTTGGGAGCAAAAACTCAGTCATCAAGATAAATAATCTTCTAATT	0.620998	0.500271	0.52106	0.585851	0.577947	0.215221	0.351299	0.387409	0.308292	0.636018	0.522654	0.64022	0.592455	0.570222	0.567862	0.858557	0.82408	0.842287	0.794526	0.825001	0.83021	0.855011	0.838348	0.865436
cg18183941	NLRP3	TAAAGGCCTCACGTTTAGCCATTCACTCAGTGTTTTCTGACAGCCTTCTAGGATAGGTAC[CG]TTATTTGGGTTGATGTAGTGCTTGGTCAAATGCAGTATAATGAAGGGATCAAGGAGGGGG	0.682465	0.61874	0.700067	0.669604	0.669243	0.314878	0.505414	0.442624	0.463097	0.43991	0.651514	0.709165	0.689694	0.654176	0.547774	0.862495	0.863257	0.877626	0.853936	0.856417	0.840191	0.845623	0.856465	0.877747
cg00214970	SPHKAP	AAGTAGGGAGCCTACATTTCACCATCTGTAGGCTCTAAGGATGTAAGTCAGTCCCCTGGG[CG]AGGTGGTGTCAGAGGAGACTAAGTAGGGACCAGGACTTTCATCCCCTCCAAACACTGGCC	0.544264	0.435482	0.45113	0.518814	0.506573	0.157124	0.246261	0.244861	0.14812	0.238965	0.477476	0.489693	0.548393	0.502435	0.282834	0.808643	0.794747	0.806075	0.814383	0.786126	0.778274	0.788895	0.747707	0.778571
cg08246090		ATTGGTCTGAACCCAAACTCTCATGGACTCATATCTAAATTCTGATATGCTTTTCAATAA[CG]ATTCCTCTTGATGTATTACTCCATCTTTACATGAAATCTTATTGCTAATGGACTCTAGGA	0.431367	0.413869	0.364205	0.348017	0.377562	0.100954	0.193499	0.138218	0.100244	0.0949413	0.434262	0.380756	0.385622	0.371671	0.0857928	0.690047	0.672092	0.655619	0.649865	0.717997	0.69386	0.669681	0.606559	0.690685
cg11018892		CTATACCATCATGCCCCTGCCTTTGCTAGTTTCTTTTTTCTTTACAAGACCTCTGACCAT[CG]TCCATAGAACTGCTGTTCTGTTGTCTCCTCCCTATCAACTCTCAGGCTTCTCTTAACATT	0.420955	0.335529	0.432322	0.453475	0.413479	0.129283	0.27929	0.170729	NA	0.330394	0.368196	0.42361	0.445521	0.413371	0.543261	0.746323	0.74547	0.743826	0.761185	0.729984	0.737257	0.704118	0.672594	0.743874
cg25499650	OVCH2	AGGAAGCCTTGAGAGACCAGCAATAAGCCAATTTAAAACAAGTTTATTCATTAACCAAGA[CG]TGGTGAATCAAGCATGTCCATCTGATGTTTCTGAATGTAGTGTTTCGCAAAGATCTTTTG	0.455068	0.322386	0.405974	0.466291	0.343476	0.181183	0.176677	0.202736	0.221764	0.16838	0.305677	0.402875	0.510454	0.325155	0.136132	0.778402	0.73974	0.762293	0.763571	0.784119	0.734595	0.798361	0.752734	0.783558
cg12187999		CCTGGCATAAGGAGACAGATGACTGCGGCTTATGCCTTCAACACTGGCTCTTTCTGAGTA[CG]TTTTACACTTGCTGGTGGGGGCCACACTAGGAAAAAATTTCCCTTTGCATTTTCCTTCCA	0.520338	0.465889	0.514109	0.499771	0.491934	0.284985	0.202915	0.352606	0.278343	0.182767	0.486409	0.512729	0.513624	0.527431	0.29069	0.750279	0.740766	0.723264	0.752091	0.756671	0.722624	0.76611	0.675184	0.741836
cg22299097	MINA	GCTCAAAGATGAGCCCAGTGACATGAAACCCGAGGCACCAGATTTACAGCTAATGAGTGG[CG]AAATCAGATCCTCTTCCTCCCAGTCTATCCTTCCTGAAAACAGTGAATAACCTGGTCTCA	0.279708	0.296774	0.294314	0.344881	0.241468	0.0713517	0.0522118	0.11111	0.0747038	0.238208	0.328609	0.285905	0.338612	0.28233	0.462718	0.664088	0.690136	0.694897	0.688886	0.687371	0.662821	0.654492	0.584504	0.73247
cg26123647	MYT1L	GGAAAGTGCACTAATGCCATGAGCCTGGGACTGGTGTGCATGTGGACAGTTGGGTCAGGA[CG]TCTGCAGGTGGTAGGGCTTCAGTAAATATGTATTAAAGCCAGCTACGTGTCAGTAAACCA	0.299615	0.388696	0.382752	0.458153	0.317281	0.180907	0.13443	0.095698	0.220788	0.114091	0.421399	0.398834	0.425928	0.400887	0.171643	0.773645	0.785261	0.770556	0.789242	0.78019	0.770092	0.794619	0.735313	0.73383
cg25974017	MGMT	CAGGCCTGGTTATGTAATTCTAATGCAGAATCTCCCCCTTCGTGTTTGCATGCGTGTAGC[CG]GGTTCACAGAACTTTAGCCACAAACAGGAGTGTTTCCCTTTTTCCAGGGCTCCCGTGTTA	0.428641	0.49617	0.597872	0.519207	0.491407	0.267137	0.157357	0.171991	0.243283	0.129156	0.536976	0.641111	0.599097	0.521576	0.0956666	0.858248	0.878299	0.879846	0.848037	0.861473	0.844315	0.858005	0.844474	0.874435
cg27247689		ACATACCCACTCACAACACATTTACATATATGTTTATGTTTCTCCCTTTAATGGGATTCA[CG]TTATTTTTTAATTTTTTTTTTTACTTTAATAGCTTTAGAAGTATAAGTGGTTTTTGGTTA	0.496944	0.483044	0.518123	0.508678	0.372412	0.301125	0.322275	0.142338	0.1711	0.149706	0.525817	0.528199	0.525937	0.491883	0.278315	0.84567	0.849191	0.826888	0.826653	0.84906	0.835565	0.816455	0.809263	0.815037
cg01499522	MLXIPL	CTGACTGGGGTTACATCAGCCTTGAGTCAGCCTCTGGGTGGGGGGGCAATTTTGGGGGTG[CG]CTCTGTCCCTTACCTTGCCAGCTCCCCAGAACCTCTCCTCTTTGGTCACCCATCGTCAGG	0.350177	0.396013	0.366264	0.367724	0.365619	0.126331	0.157876	0.185048	0.108214	0.312623	0.341054	0.377445	0.349141	0.395868	0.511779	0.519957	0.509004	0.543482	0.527191	0.511707	0.5201	0.526443	0.496438	0.5539
cg25528806	OR8D2	ACCACTGTGACCACATATATTCCAAGGAACAGGAGGAAGAGTGGCAGTTGAAGTTCTGGG[CG]TTGTGTCAAGCCTGCCAGGATAAACTCAGCCCCTGAAGAATGGTTTGAAGTAGCCATGTC	0.53148	0.373472	0.498096	0.450409	0.482352	0.147087	0.190622	0.174207	0.335339	0.106935	0.457963	0.514762	0.456616	0.451717	0.151697	0.837274	0.808735	0.827285	0.818433	0.816854	0.817687	0.833523	0.793366	0.844877
cg11370064		AGTGACAGTGGCAGCCCTCAAGCAGGATGCAGACCTGTGGGGGCTCAATTCTTAGAGAAG[CG]CCAGCTCTACCTTCAGGCTTGCCCTCTGGGATTTGAGGCAGGGGTGGAACTACTCTCCGT	0.650987	0.558431	0.602496	0.630127	0.604201	0.360836	0.367863	0.433595	0.376605	NA	0.56449	0.64476	0.632967	0.587851	0.301771	0.819533	0.818667	0.843327	0.809197	0.828407	0.821246	0.833161	0.808955	0.859347
cg27237541	MYO3A	TTCCTTTTAATTCCCTATTCAGAACAGACCAGAATAGAGGCATATTCCATCTGCAGGCTA[CG]TTCTAGACCTCTCCTTTCACCATTATTTTCATTCATTTGCATATATGTCCAATGGCCTTG	0.422748	0.416005	0.549565	0.478459	0.462463	0.244835	0.281388	0.242972	0.202089	0.089742	0.450675	0.541044	0.46444	0.464575	0.203184	0.81001	0.824477	0.844326	0.812024	0.816207	0.838282	0.805375	0.760023	0.823117
cg08981777	ELSPBP1	AGGGCTTTTTCATTGTTCAGCTGAAACCTCTCCAGCTCCTCATAGCTGAATTTCTGGGAA[CG]TTCCCTCCTCTGTTCATTGATATTCTTGTCCCTGACCCCAGCCCCCGCAAGGCCCCTTCT	0.378421	0.330121	0.258203	0.437489	0.384142	0.0862896	0.130759	0.0861156	0.0864043	0.336409	0.298472	0.294511	0.429089	0.361479	0.756253	0.787142	0.795446	0.837837	0.842368	0.839278	0.828103	0.828673	0.735296	0.843707
cg04505750	AADACL3	GGGGAGTACTATTATTATCCCCATTTGACAAACTTGGAAACTGAGGCTGATTGCACATAA[CG]TGCTCATGATCAGCATGCTGGCATTTGGCAGAGCCAGGATTCAAATTCAAGTGTTGCAAA	0.49587	0.432966	0.48852	0.511933	0.44871	0.200407	0.227674	0.174848	0.352323	0.0895946	0.488391	0.486316	0.517527	0.46387	0.088981	0.718671	0.720059	0.725177	0.717101	0.721294	0.721905	0.685932	0.663188	0.702667
cg11015348	LUZP2	CAGGTAAAAATACCTGGGTGAGATTTGACTACTCTCTCCAGACCCTGTCTTAGTTTTCCT[CG]ACCCCTAATGGATAGAAACCTAATTTCTTCCTCTCCTGTGAAGCAGTGTGATCAAAGTCT	0.390096	0.380777	0.457189	0.434187	0.325251	0.126849	0.167593	0.130414	0.26907	0.276556	0.394737	0.456804	0.46396	0.355133	0.251179	0.697225	0.722558	0.73139	0.735576	0.767006	0.739985	0.688403	0.714723	0.760809
cg03197835	KCNQ1	GTAGCTAAAGCACCTCAAGCAAGGGTGTCTCCCTTAGAAATACATGTGCCTCCAAGTCCT[CG]AGGCTGGCATCCCCTCCTGCTCCATCTGCCTCTGCCTGCTGGGCAGACCAGTCTGCTGTC	0.618455	0.578798	0.629744	0.636387	0.618926	0.358712	0.427163	0.381784	0.126876	0.537768	0.631729	0.648135	0.684998	0.645867	0.520705	0.809612	0.786899	0.824643	0.802641	0.800102	0.792775	0.780144	0.754671	0.799952
cg02347881	LOC144776	AAAAACGTCAATTTAATAGATTCCATTGTAAAGCAGAGCTTCCAGATTTCAGTAGCATCC[CG]AATTAGGAAAGCACATTTCATGTAACTTCAATGTCTTCAGCAAGTAAAGTCCTGCTAGAT	0.570254	0.52452	0.62907	0.598727	0.554979	0.17556	0.360827	0.389482	0.269228	0.295859	0.54535	0.593003	0.612858	0.553757	0.231194	0.837751	0.790439	0.832908	0.80332	0.85601	0.815096	0.800662	0.80506	0.824542
cg19380156	KIR3DP1	CTCCTCTTGAAGTGATACCTTTTCTAGCTCTTGTTGGAGGTGTCTCAGGACTCATTACTT[CG]GGGAACCTGCAACTGTGTCAGTCTGGGGAAACTGCAAATATTCTTGTCTTACATTTGTCT	0.414825	0.398378	0.395992	0.39278	0.423592	0.14577	0.25737	0.0993471	0.105324	0.193701	0.404105	0.382362	0.391972	0.445653	0.204	0.695782	0.678694	0.71692	0.713346	0.692092	0.679144	0.648249	0.565426	0.657277
cg07075238		GGACCCGCCATGCTCAGGGCTCAGCACCCCCGAGTTAAGGAGACAAGAGCAGCCATCTCC[CG]GCCCCCAAGCACCCGGACTCACACCCGCCTCTGCTGCGACTTCACCAAGGAAGGAAAAAT	0.62651	0.473716	0.469024	0.452193	0.419268	0.187092	0.277426	0.216731	0.291549	0.0749828	0.50442	0.577729	0.471686	0.368999	0.121922	0.952554	0.93696	0.947596	0.939403	0.948526	0.927745	0.947281	0.930199	0.935368
cg16171771		TCATTATTGTTATTGTGTTAGAAACAACAGGAGGGAGGGAGAGGAAACCCAGAGTTGACT[CG]AATTATTATTGGGAAATAATGGGAACATCTTCAAAGAAAAGTAAAAGGAAAAGAAAATAA	0.529476	0.501185	0.590219	0.595003	0.508265	0.191828	0.231362	0.130422	0.185202	0.121185	0.531942	0.563512	0.604361	0.556671	0.148488	0.855223	0.869173	0.87572	0.846814	0.846139	0.820954	0.811885	0.795653	0.844939
cg08845722	PRKCE	TCATCACCACCGATCTGGAAGAAAACGAGGAGCACCAATTCTCCTGGGGTCTGTGCTATT[CG]GGGGTGTGAGCCAGGCATCTTGATTCTTTTAGACCTCAGGCACATTCAGGTTGGGTGCCA	0.448522	0.507073	0.338755	0.341402	0.428299	0.177397	0.157789	0.23689	0.132661	0.168643	0.436179	0.354368	0.328307	0.454337	0.254781	0.856971	0.844433	0.851988	0.845679	0.843698	0.814411	0.829889	0.804995	0.857775
cg11394278		TGGATAAAAGAAAACTTATTAAAGAATAGTCCACATTCAGGAGAATGCACATCTCACAAA[CG]TGGAACTCTGGATTTTCACGAACTGCAGACAGTTGAGTCAGCAGCACTTGCAGGAGCAAA	0.485633	0.520991	0.513671	0.488347	0.603896	0.213842	0.334543	0.33564	0.381617	0.204875	0.507249	0.523411	0.493381	0.540308	0.291362	0.634734	0.678317	0.465925	0.790942	0.764169	0.820086	0.802491	0.800203	0.785935
cg18067840	BTNL2	GCCTGAACTTCCTTACAAAAGCCTTCCAACTTGTAACAGACTTTGGACCACCCTCAACTT[CG]TTGGTGTGTCTTCCTACATCAGTCCTGACATTTGCCTTCCAATAGAACTTTATGAAATTA	0.423584	0.372726	0.406481	0.488125	0.328801	0.136765	0.176765	0.0940811	0.23979	0.313399	0.411468	0.387117	0.502935	0.369357	0.220646	0.817212	0.794809	0.787384	0.781534	0.751486	0.758923	0.781768	0.725969	0.756752
cg23732608	C20orf26	CAGTTCCAGAACCCCTACGCCCACTCCCTGACATCTGCCCTTCATTACTTGGTTCCCGTG[CG]ACCACGACGACAGATTGTCTATCCTCTGGAAAAGCTTGGCATAAACGCTCCATCAAAGGC	0.463454	0.343889	0.366195	0.353717	0.352745	0.101276	0.171412	0.187175	0.137418	0.18939	0.321651	0.426071	0.343538	0.376776	0.14817	0.857674	0.854323	0.858499	0.857487	0.845418	0.847969	0.870995	0.715296	0.86037
cg11485894	ADARB2	GTTTTCATTTCTGTTTCTTCTCTTGAATCCACCTCCCTGCTCATCTGGGTGGGGGCTGCT[CG]GGCCTCTGTGTGCGAACACTGCTGTGGGTCTGGTTATTTGCCCACCCACACACCTAAACA	0.60547	0.516766	0.571911	0.602169	0.551187	0.14924	0.322658	0.193853	0.410882	0.128873	0.548532	0.583217	0.643991	0.533357	0.202703	0.869953	0.851378	0.868159	0.847187	0.84216	0.837269	0.848971	0.788367	0.866764
cg16690845	INPP5A	TGGGCTGGGCGGGGCGGGCCGCTGGCAGGCTGTGGGACAGGCCAGGGCTATTTCTGCGCT[CG]CTTGGAGAGGACTGACAGCTCTATGGCGCCGAGTCATGGTCCCTGGAAACAAGAGAGGTC	0.534198	0.463413	0.558523	0.572575	0.470277	0.390679	0.252934	0.217845	0.277225	0.318046	0.490196	0.581684	0.511527	0.418232	0.202626	0.845811	0.808051	0.813881	0.829005	0.815454	0.80528	0.815055	0.791476	0.826639
cg17161617	RSPO1	TGTCCCAATGGCCAGGGAACAGGGATGGTGGATAGCCAGAGAAAGTGGAGCAGTTGGGTC[CG]AAATGCCCAGTGTCTGGGTTCATTCAGCCAGAGCATTGCCAAGTTTGCAGGAGGCAAACA	0.342843	0.278486	0.278696	0.42107	0.379257	0.155802	0.133247	0.0611742	0.134281	0.272498	0.295927	0.294209	0.421502	0.340607	0.50291	0.724533	0.732575	0.771827	0.738037	0.7396	0.746818	0.744941	0.675705	0.732237
cg11022093		ATGAGGTAGCTACATTATTCTGCTTTTCAAACTTTAATGTGCAAAATAATTCAGGGGAAT[CG]TATAAAATGAAGATTTTGATTCAGTAGATCTTGGATGGGGCCTACACTTCTGCATTTCTA	0.613336	0.561892	0.601634	0.579586	0.501532	0.389547	0.323304	0.233169	0.40913	0.320124	0.585824	0.602832	0.575499	0.630617	0.413464	0.852049	0.840865	0.832885	0.831577	0.869737	0.847133	0.868354	0.815755	0.884524
cg20621674		AATTATGTGAAGGTACAAAGTTAACATTAGCGAGATTGGCTTAAATAACCCTCAGCATTA[CG]AAATAGTAAACTTGAACTCACACTCACATTTATCAACCTGAAGCCAGTCAGCTTTCCTTT	0.638996	0.585799	0.660475	0.643536	0.666146	0.312258	0.360007	0.434808	0.546656	0.406443	0.623805	0.649334	0.671359	0.649642	0.520899	0.819027	0.795408	0.821831	0.845499	0.826379	0.837476	0.838002	0.816187	0.853523
cg23496906	UBE2E1	ATGTAAATTTCCAGATGTGCTGGACTGTCCCTAGAGCAGCAGCATATACAGTAAGACCTA[CG]ATTGAATGACTAACTGGGCAAGATTGAGCTTTTGTGATGTTTTAATTATTTTACCTAATA	0.50882	0.352772	0.372981	0.286695	0.343834	0.165211	0.126348	0.11705	0.164705	0.126038	0.363571	0.320022	0.27189	0.386264	0.0983865	0.855882	0.868732	0.830098	0.867179	0.86395	0.855017	0.864741	0.809541	0.871714
cg10481584		CTCTGCTGTTACTGTCTGGTTGTAGGTAAGATAAAGCAATTAAAAGTGGGTGGGGGTGGG[CG]GGGAAGCAACTTAAGCATTTCTAACCCACTTTGGAAAGTCAAGCATCCTTCAATGGGCTT	0.520959	0.485453	0.568271	0.564579	0.583718	0.217382	0.287981	0.261806	0.441428	0.242573	0.554854	0.569737	0.583093	0.572039	0.250843	0.774318	0.798374	0.765535	0.737803	0.800794	0.785562	0.790029	0.764952	0.805614
cg25731428		CTTCAAGTCATTCAGACACCTCACTTGCCATTAAATTAAGAACAGATGTAGCAACACCAG[CG]TAATCTACTAGAGTGAAACCTTGTGTACTAGTCAGCTCGAGTTGCTATAACTAAATACCA	0.519251	0.438795	0.510696	0.565337	0.547005	0.218268	0.184807	0.165236	0.332499	0.219893	0.489404	0.537519	0.580779	0.453221	0.323621	NA	0.841433	0.831913	0.840784	0.833974	0.866038	0.884	0.79555	0.834919
cg08648317	PLAC1L	AGGTAGCTGACACTGTGATAAGAGCATCCTGTGAACTACCCAAATAAGGAGGAAAACGAA[CG]CAGCTGAGCATGGGATGCCATATAAAAATCACTTAAACCAGTCGCCACTCCTTGTTTCCT	0.54868	0.508619	0.551691	0.578922	0.529297	0.21335	0.386447	0.339301	0.314591	0.139208	0.557577	0.552203	0.574674	0.53229	0.194428	0.876419	0.847006	0.869137	0.851051	0.835184	0.824027	0.816665	0.750008	0.860682
cg03815116	YIPF7	GATGGATATGCTAATGGGATCTAGTGCTTCTTACCTGATGGACAGGTTCTATACCATTAT[CG]AGCCAATCCTAACCACTGGAAGGTGTTAGGCCCATCCCCACCTCAGGAAGCTCCCTGAAT	0.656548	0.591776	0.646539	0.672864	0.594846	0.350399	0.389256	0.37407	0.280401	0.277649	0.647816	0.671544	0.689771	0.612889	0.364212	0.851179	0.867025	0.859987	0.858175	0.873368	0.854954	0.861163	0.835603	0.877589
cg14764476		AGTGAGCTAACAAAATATGTTCATTTTGCATGTCAAGTTTGGTGGTGTGGTTCATTTCAA[CG]GACACTTCAGTGCATCTAACAGTTTCAGTATCATTATTATGAGTTCCCTCTCGTGCCAAA	0.563843	0.487332	0.569299	0.609255	0.531801	0.269388	0.305597	0.182049	0.198043	0.388224	0.570287	0.612154	0.651157	0.53795	0.19473	0.885537	0.877387	0.845829	0.875117	0.874239	0.859941	0.832552	0.801003	0.857283
cg05678658	TPO	TTCACTGTTTAGAAAATAGTGTCAACGCCCTGCCTTACACCCTCAGGGCAGCTCCTGGGG[CG]GGGCGGGGCGGGGCGGGGCCCTTCTCTAGTGAGAAAGGAACTGGAGGCCTAGAGAAAGGG	0.548068	0.5278	0.556021	0.568469	0.51156	0.327304	0.354272	0.249962	0.315133	0.388538	0.541868	0.57309	0.579314	0.53132	0.370604	0.797653	0.799117	0.809905	0.817815	0.804611	0.801249	0.794543	0.722425	0.818204
cg24547910		TGGATGAAACTGTTACCATAATTTTAACAGCATGAATCCACATCTGTTTAATCTAGTAAA[CG]TAGACAGGGTGTGAACAAGAAGGAACTAAGGTGGAGTAATGCTTTCTAGCTAAGATACAT	0.443019	0.414929	0.39554	0.421957	0.329473	0.202527	0.291664	0.107245	0.156257	0.29144	0.425798	0.391727	0.412708	0.394069	0.208599	0.712134	0.726776	0.735918	0.700484	0.71918	0.701188	0.690912	0.658581	0.745259
cg14511647	OR51A2	CATGATTCATTCATAGGGCTCTGCTATGAAAAATACAGATACACCTGACCTCAGGTGATC[CG]CTTGCTTGTGTTGGTAAAATAGGCATATCTGTAAATTTAGTAGAAAAAAAGCAGTGTTAA	0.645745	0.632097	0.629033	0.587536	0.679175	0.418335	0.462778	0.346679	0.248779	0.2515	0.625195	0.649545	0.61533	0.661458	0.550324	0.862424	0.856927	0.857914	0.851457	0.847739	0.839986	0.839795	0.826714	0.876036
cg05304729	MNDA	AGTGGGGCACCTGATAAGGTTTCCTTGTGTTCCTCTTTACCCTTTACCTTAAGACCTGCT[CG]AAGCATCAGCATAAGAGAGAAACTGAAACAATGAACACCCACATGTGTTAGTGGCTGTCA	0.435577	0.369178	0.384362	0.374935	0.240572	0.139317	0.235418	0.0939824	0.109556	0.191126	0.375515	0.393101	0.380867	0.338319	0.0833782	0.792649	0.811219	0.815552	0.787312	0.794044	0.785061	0.782442	0.744248	0.803262
cg12051819		TGTTTGCAATGTTGGCTGAACATTAAAATTGCATCATTGGTTTCCTCTCTCACTTGTTCT[CG]TTTTTTATTTTATTGTTATTCAGTGCAAAACAAAAAGCTGTGATGGAAAAAGACAATAGA	0.357125	0.443798	0.392833	0.50049	0.325024	0.194008	0.191987	0.145529	0.22234	0.143224	0.431787	0.422338	0.492537	0.37639	0.159733	0.832326	0.826656	0.787403	0.7831	0.803856	0.781905	0.803327	0.7751	0.827164
cg24387800		TCTCAGTCTATAGAGTGAGCCCTGGAATGAGGAGTCTCAGTCTACACAGTGAGCCCTGGA[CG]AGGGTCCTCAGTCTGCACAGTGGGCCCTGGAATGAGGGGTCTCAGTCTACACAGTGGGCC	0.449106	0.469915	0.503516	0.509164	0.415736	0.214411	0.265663	0.269969	0.278741	0.181916	0.509199	0.526741	0.515636	0.509482	0.186709	0.726689	0.704382	0.729658	0.701009	0.721403	0.707627	0.710644	0.680906	0.727633
cg27182527	WIPF3	CTCTTTTTCAGAGCAGAAGCCACTCTCTTGGGACCATTCATAAGCAGGAGACATCAACAC[CG]TGACACATGCCAGTGCCACCGCCACCCCCACCTCCTCTGCCTCCACCTCCCCCGCCTCTG	0.637375	0.606459	0.595829	0.590644	0.537769	0.356895	0.267632	0.198321	0.484415	0.350098	0.601353	0.619337	0.64783	0.577607	0.209066	0.835308	0.816697	0.831415	0.817689	0.816108	0.827704	0.855989	0.799645	0.86778
cg00753442	LOC285780	ATAGGTCATGGCATTTGTGGATGCACCTGTGGGACACAGTCACCTATATTCTCCTGTGGG[CG]CCCCCAAGGGATGGGCTTAGTTGAGATCTGTTGTCCCTGTGCAGGAACCAGCTCTGAGCT	0.576198	0.5634	0.592568	0.559115	0.50974	0.225255	0.331237	0.392246	0.330683	0.272854	0.592879	0.595228	0.58469	0.610298	0.279146	0.770767	0.781319	0.801663	0.781346	0.742109	0.713118	0.755109	0.735722	0.780487
cg07081739	PRSS16	AGACCTTTCTGAATGAATGACCTTTGAATAAAGATCCAGTTGAAGTGAGGGAGCAAACCA[CG]TGGGTATATAGGGAAATCACAATCCATAGGGTGGGAACAACAAGAATAAGAACCCTAAGG	0.314143	0.324483	0.321614	0.329106	0.410811	0.103398	0.122809	0.153385	0.095069	0.237093	0.34908	0.317335	0.349476	0.374605	0.207928	0.659999	0.66111	0.707326	0.666404	0.63871	0.651501	0.629056	0.5998	0.703553
cg12124767	CFTR	TTTCAGGCCTCTCCTTACACATCACTTCTTTCCAAAAATCTGCCTTGACACTCCAGGTCT[CG]GTTTCCTAGGTGTACCCTATAACTCCACCCCTTTCATAGCATTTCTCACTCTGGCTGGAG	0.510962	0.519902	0.555758	0.573091	0.479594	0.3312	0.319732	0.170249	0.344251	0.151682	0.564372	0.565208	0.599573	0.569054	0.239682	0.773327	0.766886	0.781261	0.775548	0.762243	0.76588	0.768297	0.730111	0.781172
cg00537960		TGCCTGTAATCTCAACACTTTGGGGAGCCAACACAGGAGGACTGCTTGAGTCCATGAGTT[CG]AGACCAGCTTGGAGACTTAGTGAAAGCCATCTCTACAAAAAAAATGTAAAAAGTAGCTGT	0.666138	0.648201	0.660648	0.626291	0.593378	0.356111	0.34299	0.558791	0.449773	0.222116	0.66395	0.65522	0.664512	0.617241	0.512515	0.833012	0.846349	0.823809	0.842691	0.84959	0.825322	0.828511	0.806139	0.84975
cg14761454	ATM	ATGAGGCCCAAAATGTTAACAGTACTGAGGCTGAGAAACCATGTTTAAGACTATAGTTAC[CG]AAACTCAACTAGATTACCAAACTGCCAAAACTCAGAATTCTTAAGCAAAAGATTAATCAG	0.365647	0.367611	0.406102	0.479121	0.316868	0.106926	0.217445	0.140974	0.138106	0.2616	0.360156	0.434654	0.466925	0.373987	0.538954	0.815943	0.817932	0.794145	0.820972	0.817495	0.794913	0.784849	0.716707	0.815971
cg17551002	OR6Y1	AAAATGGAGAAAAAGAGAAGCTGGAAGGCTGGTCGTGTTGGAAACCCCAGAAGAATGAAA[CG]TGTTGTCACTGTATGATTATCTACTTCCAGAATTATGGTGGTCATGACTGGCTGTGGGCA	0.606092	0.558764	0.528765	0.627927	0.563514	0.245285	0.42919	0.293261	0.369982	0.373161	0.588195	0.564921	0.633852	0.576778	0.324777	0.864689	0.848402	0.866245	0.836832	0.840254	0.843274	0.843453	0.794616	0.856882
cg05281206	CCL13	AGGGCCACCCCAGCCCTCCCATCAACAGCTCTAGAAACCCAATGGTCCTTCCTGGAAACA[CG]GGGCCTGCATCAATCAGAGGTGTTTGAACCATGTCCCTCTGGGCCTGAGGGGCAGAAGGG	0.517904	0.572895	0.61298	0.628455	0.584198	0.286156	0.394732	0.193475	0.4242	0.641477	0.632576	0.651702	0.605903	0.560769	0.500795	0.875834	0.851995	0.839701	0.864657	0.841027	0.815256	0.824643	0.815149	0.849147
cg01752041		GCAAATAATAGGTTATTTCTATACTGAAAAGACTGCCAGACTATACTTTCCAGTGGCTAA[CG]TAATTACAAACAATTTAGATCTTTTAACTCCCCTCTTTGTCTCTAATATTTTATCCTTCT	0.519351	0.479893	0.592611	0.483553	0.426301	0.202241	0.283732	0.190273	0.358522	0.167766	0.561029	0.607984	0.477435	0.539018	0.270653	0.857442	0.868785	0.842939	0.849848	0.861002	0.815621	0.851259	0.825667	0.880338
cg15227168		CTGGGCTGGTCTCACCTCTGCTGCAGTGGCTCTCCCCTGCCTGGAATACAGCTCAAAATG[CG]AACTCTAGGATTCATGTCAGAGGTGGCAAAAGAAGTGAAAGATAAGAAATACACACTTTG	0.612552	0.587184	0.621625	0.616464	0.556894	0.336974	0.395849	0.440521	0.296086	0.539869	0.658157	0.645644	0.646369	0.583996	0.596793	0.872821	0.87818	0.869799	0.85807	0.850225	0.856949	0.871576	0.787373	0.876349
cg20940675		TCACCTTTTCTATTTCACCTTCATCATTCATAAGAAGGTGAAAGGATGCCAGGAGCAAGG[CG]GATCTACGGGACTTTTGAAAAGAAATGTACTGACCTTTGGCTGTAAAAACTGTGTCATGA	0.459605	0.392807	0.504887	0.520768	0.514459	0.238448	0.309885	0.188811	0.224515	0.34527	0.397971	0.521913	0.495405	0.46425	0.546334	0.806688	0.810948	0.835736	0.812999	0.819702	0.804393	0.811221	0.762407	0.829014
cg00545462	DEFB132	ACCAGCTCCCCAAGCCACCCCTTCAGCCATGAAGTTCCTGCTCCTGGTCTTGGCAGCCCT[CG]GATTCCTGACCCAGGTGATCCCAGGTAAACTGGATAAATAGGAGGAAAGGAAAACTGGGA	0.538553	0.452188	0.465964	0.483418	0.455402	0.132141	0.347551	0.325209	0.269445	0.467846	0.482419	0.526437	0.53406	0.503245	0.460706	0.743571	0.715363	0.751566	0.717302	0.714192	0.714374	0.684244	0.678449	0.718899
cg02825728	CLDN17	CTATAGTTTTTCAAATGGTTTTCAAAGGAAGAAAAATTCAACTGAGATTATTTCAAAATT[CG]AGTCAAGTTGTAGCTTTTGACTGCCGCTTTCTTGCCACTCCCTAGAGGCAGTGGGGGGCT	0.543153	0.49726	0.535136	0.499067	0.396342	0.142282	0.327452	0.160855	0.334803	0.16363	0.529276	0.536183	0.55281	0.500402	0.234968	0.813029	0.796464	0.791664	0.821173	0.814541	0.832969	0.817079	0.80673	0.847187
cg24044052	SP140L	TTTTTTTTTTTTTTGCTGTCCATTGCACAAGCAAGTGGACTCCCGGAAGCCAGCCCTGCT[CG]TCCTCTGGGCCCTCCTTTCCCTGGTCCTGCAGGTCTTGCTGCTTGTCAGGCCTCTCCTCC	0.42492	0.417523	0.349601	0.375035	0.475231	0.139094	0.115328	0.232322	0.124747	0.10355	0.40213	0.370244	0.383681	0.428814	0.140617	0.772362	0.781234	0.772274	0.76488	0.774576	0.754837	0.750088	0.677334	0.768898
cg12886494	ARPP-21	CAAGCTGTCTTTGCCGCTGCTCCTGTAGGAGTTGTGAGAAAGAGAAAGTGCACATTATAG[CG]TGGATTGTTTTCAACAGGCTTGAAGTTTGCAAATCTGCTGAATCCCTCTGTCAGTGTTTC	0.472969	0.488819	0.529868	0.559738	0.495248	0.354574	0.207463	0.153409	0.134578	0.158432	0.494005	0.519975	0.595749	0.527622	0.355459	0.843702	0.832674	0.838818	0.867213	0.832251	0.82095	0.819772	0.731879	0.832131
cg18482656	OR2Y1	TAGCTAACATAATGAACGTAAAATAAATATTAGTGTCTTTCAGTGGGGCACGGTGGTTCA[CG]TCTGTAATCCCAGCACTTTGGGAGGTGGAAGTGGGTGGATCACCCGAGGTCAGGAGTTTG	0.776777	0.74721	0.702735	0.741529	0.730154	0.621648	0.583865	0.394902	0.525174	0.357435	0.727844	0.712177	0.782649	0.74985	0.677516	0.920047	0.880366	0.884669	0.904624	0.916612	0.903932	0.899873	0.886163	0.905946
cg15209440		GAACAGAAAGGAGGCTTACATGGCCACCATGAAGTGATCAACAGAGATGGTGGCCGGGGA[CG]AGAAGGTGGTGGTAGCAGACAGAAGCTACATCACATCAGGCTTCTAGGTCACAATGGGGA	0.546875	0.567904	0.568758	0.557785	0.49039	0.353058	0.349203	0.157735	0.333053	0.256955	0.589766	0.58552	0.56539	0.522182	0.331729	0.815963	0.791924	0.83491	0.780213	0.817418	0.805381	0.782106	0.738947	0.815123
cg18813778		GGAAAGAATAATTACAGGCGCCAGGCCCAGGGCCTCATTGCCCTGGTCAGCCTCAGGACA[CG]GCTCCCAAGATCCTGGCAGCTCCAGATCCAGCAGTGGCTCAAAGAGCTACAAGTACAGCT	0.328057	0.299055	0.4332	0.339765	0.282803	0.06487	0.183974	0.111937	0.0957252	0.158851	0.363208	0.449076	0.353028	0.360204	0.0715327	0.714478	0.737115	0.701432	0.700914	0.711358	0.709862	0.705643	0.641765	0.70809
cg05242592		TAGCAAAGGAGACTCCGAAGATTGACTAAGGTGCTTTGCAGGAAATAAGAGGGAGAGTGG[CG]GGAACATCAAAATGGAAACGTTCCAGCTCTAAGAATCTCCAAGCATTGTAGGAAAGTCAA	0.744753	0.755412	0.747209	0.701241	0.745077	0.496397	0.483945	0.392765	0.558329	0.430822	0.754678	0.75062	0.748778	0.769359	0.429244	0.865465	0.853453	0.86746	0.856077	0.852648	0.844101	0.861846	0.868883	0.863248
cg07144984	ZBTB20	ATGGTAATTGTGTTTTAAAACTTTCAATGGCAACAAGTTACAACAGTAACTTCAGAATAG[CG]TTCACTTGAAAACATTGGGTGAATGGCCTCTATAATTTTTTTAGCTGAAATGTATACACC	0.52148	0.400611	0.503221	0.45809	0.367935	0.172886	0.201682	0.221002	0.250614	0.163643	0.397486	0.473415	0.460817	0.397033	0.201503	0.777408	0.776881	0.742697	0.796358	0.813929	0.805514	0.797671	0.804538	0.829274
cg00426855	NMU	CAAGGAGACATAATTACTAAATAAACCTTAATAACATTACGAAGATATTACTCTCAAGAA[CG]AATTACTTATGTCTACAGACAAATAGAAACACATCTCATGCTCATGAATTGGAAGAATGA	0.554712	0.481024	0.487318	0.59564	0.562195	0.288244	0.290045	0.212035	0.432956	0.283303	0.525143	0.571832	0.578894	0.577227	0.235553	0.860788	0.833785	0.822785	0.820164	0.831811	0.791006	0.832954	0.796551	0.819955
cg20118157	ATP13A5	TCCCTTCTCACAATTTCTCTCCGGGGTAAAGTTATTTCTCCTGATGTTTGGATATGCTTT[CG]CTACTGAAAAGTGAGAACTATGTAAATCTGCATTTTCTCTCTCTACCCAGCTGCTAGGGA	0.583164	0.471848	0.533576	0.583346	0.557318	0.302059	0.322011	0.186615	0.33385	0.170035	0.603689	0.587061	0.584095	0.504346	0.310275	0.843457	0.820284	0.828598	0.809185	0.821468	0.862807	0.829017	0.78917	0.847552
cg12146073	POLQ	CAGAAGGTACGAGACCGTCAGAGCCTGGCTTTAGAAGCCTGGAACTAGTGGAGAAATTCA[CG]TTACTTGAGACTAGAGAAATAATGAACTTGGGTCAGAACAGGAACAATCAGAGAAGCACA	0.583446	0.591265	0.607159	0.64008	0.540279	0.30075	0.192979	0.132698	0.104434	0.458442	0.628369	0.629588	0.658902	0.647785	0.300874	0.85027	0.837511	0.842407	0.825406	0.829175	0.805591	0.839967	0.787504	0.835484
cg23912509	MIR135A2	CCTTTGTTTTTGGTGAATTCAATGGCTGAATGTTGCTGAGTGTCTCTTGGTCTTGTTTCC[CG]GTCCTTGTAGCTAAGAATGTCGTGGAAGGATAAAATCTTGTTAATTCGTGATGTCACAAT	0.587722	0.55488	0.615791	0.654404	0.56578	0.26036	0.4973	0.380731	0.318891	0.285684	0.565775	0.642736	0.652612	0.581025	0.38179	0.834382	0.868057	0.865101	0.837648	0.860097	0.852835	0.841771	0.817304	0.880001
cg06815950	CUX2	CCAGCACTGCCCGAGCCGGCGAGGGCCTCTGTGCACCAGCTCCATTGCCAGGCAGGCCTG[CG]CAGATCTATAAATTGATGGAATTCAAAGCCTCCAGCATCGATTACCGTTATAACAAACAG	0.460859	0.577931	0.524035	0.415226	0.55816	0.136462	0.315795	0.190889	0.282894	0.121776	0.565708	0.536866	0.405387	0.516866	0.153509	0.910734	0.888945	0.917249	0.890401	0.925995	0.905069	0.895999	0.858068	0.889149
cg19280785	KY	GAAAAATGAAACCAGAAAATAATGTGTTGGCAAGAATATGGAGGAATTGGAACTCTTGTA[CG]ATGCTAGTGGGAATGTAAAATTGTGCAGCTGCTGTAGACAAATTTTGACAGTTTCTCAGA	0.567802	0.489037	0.509223	0.568491	0.524447	0.209065	0.257461	0.287483	0.280401	0.267369	0.505089	0.523874	0.544365	0.555755	0.434366	0.829507	0.817786	0.81128	0.820307	0.821588	0.804569	0.825825	0.745141	0.834939
cg15913157	PARD3B	CTTGAGTTTTTGTTCTCTCTTACTGTCATCTGCTAATACTATAATATCTGCCCCAAGGGG[CG]TGTGAATCATTCTTTTCCTTCACTCTAAACATACGCTAACAATTCCTTTTATTGTCCTCT	0.878073	0.808413	0.802351	0.862301	0.823215	0.567304	0.607914	0.523229	0.6399	0.72071	0.802335	0.842934	0.886425	0.820127	0.587874	0.324348	0.353357	0.315482	0.299681	0.337271	0.314441	0.399627	0.297957	0.506253
cg07700925		GTGGTCCTGTTGGTCAGGCCAGGGCATTGCTGCCAGGTGGCTAGGAGGGTGCTCTAACCC[CG]GGGTTCTGAGCCCACTGTGGCACTCAGATCCCATCTGCTCCCCTGCCCTGTCTTGTGTGT	0.402974	0.202691	0.351845	0.3489	0.266916	0.0887022	0.0963594	0.11774	0.0962723	0.14815	0.240275	0.353948	0.331703	0.22871	0.313607	0.80419	0.791948	0.818031	0.806685	0.816295	0.781604	0.795694	0.721537	0.81498
cg05117324	OR52K2	TTCCAACTGTTCTGATTGTTAGTGACTTAGTCTTTTGTTTTCTCAATTCATAAGTGTCCA[CG]TTTACTGAGCACTGTTTCAAGATTTGTGCTAAGTGTTTTAAAAGATCTCAAAATCCCCAA	0.351962	0.379842	0.398674	0.476015	0.487589	0.223694	0.124634	0.201506	0.15783	0.249334	0.390186	0.406969	0.502582	0.423924	0.413167	0.785907	0.77844	0.772546	0.755214	0.787009	0.765462	0.759843	0.728823	0.751439
cg17788013	SPINK5	TCTTCCTTTCCTCTCCTCTCCCACTTATGAAGGGAGTCCAGTCAGAAACATGTTTGTCTA[CG]AGGTAGTATATCTGGTATTTCTGAGGAATTCGGTTATTATATAGGATTATAGAATATTCA	0.550271	0.502509	0.476052	0.486955	0.386854	0.259208	0.320281	0.190965	0.311813	0.155642	0.555629	0.521478	0.505864	0.491266	0.155624	0.825854	0.842731	0.837496	0.881787	0.83758	0.817133	0.843418	0.787467	0.821174
cg13812452		GGCGGGCCTGGGCCTGGGGGGTACTGGAGGTAAGTTTTTAGCTGGAAATGACTCTTCCAA[CG]ATGACTGCTTTCCTTGATACAAGAAAACTGGGGGCTGTTGGCCATTGAAAGAATAAAAGC	0.698537	0.691964	0.717856	0.692728	0.668232	0.347241	0.44495	0.44438	0.578143	0.346544	0.719523	0.743037	0.715607	0.702273	0.440087	0.845955	0.86216	0.873472	0.848562	0.855311	0.83258	0.846952	0.804933	0.844428
cg03469655	CLVS2	TGGAAAGTATTGGTTTTCAGCAACAGGGACAACACTGTAGAGGAATTACCAGCTGGAAAC[CG]ACTTATTCATGTTAATGTAGCATAATATATAACAAGGCATCAGGCTTTCCTTGGCCTGAA	0.548257	0.380343	0.441411	0.396346	0.396355	0.173778	0.119782	0.226955	0.136634	0.107329	0.402031	0.500956	0.433411	0.363728	0.157531	0.816548	0.807152	0.785215	0.808524	0.849279	0.814524	0.843731	0.782652	0.854761
cg12643502	IGSF3	AAGTACTTACTTTAGTAGGAAAGTACCTACTTTAGTGGGAAAGTACCTACTAAGTACTCA[CG]CCTGGTTAAACCTTAGTAGGTACTTTCCCACTGAGTAAGTACTTAGTAGGTACTTTAGTA	0.690211	0.648475	0.683642	0.699536	0.712752	0.406629	0.39811	0.535332	0.518268	0.232575	0.668745	0.721936	0.682417	0.663866	0.467082	0.838319	0.847152	0.868866	0.77837	0.836136	0.820122	0.859242	0.821886	0.862889
cg19404692		TAGTTTGTTTGTAGAAAGGGACCTCACTATGTTACCCATGCTGATCTTGAACTCCTGGCC[CG]AAGGGATGCTCCTTGCTTTGGTCTCCCTAAGTGCTGATATTACAGAATGGAGCCACTGCA	0.616995	0.636966	0.674967	0.693264	0.6832	0.348556	0.495784	0.41126	0.501451	0.337519	0.688786	0.687704	0.645388	0.669137	0.36375	0.810522	0.820783	0.800363	0.827855	0.823968	0.826471	0.834132	0.849342	0.844218
cg18480432		CACTCTGCCTTTTTTTTTCTTTTTTTTCTGTCTCATCCACTATCAAATCCAGAGTTTGAA[CG]GCTCCTTCTGCCAATGAAAAGTAATAACAAAGGAGAAAAGCTAGTGGAGATCAGTATTAC	0.608219	0.514973	0.604661	0.5803	0.585462	0.386495	0.275346	0.251206	0.436703	0.417827	0.566288	0.583551	0.590152	0.56719	0.369515	0.860716	0.86608	0.868436	0.88257	0.846341	0.849036	0.831093	0.780706	0.84522
cg05244952		ATCAAAGGCTAGTAGAGAACATAAATCTGTAATTCCAATAAGGAGTCTTTTCATTGTGCA[CG]TGACAAATATGCCACGACTTCATCTAAGTTATCATCATTTCTCATCTGGACTACCACAAC	0.616637	0.515968	0.550407	0.491299	0.490339	0.392962	0.2294	0.356291	0.314747	0.339935	0.547623	0.609745	0.507717	0.565903	0.613842	0.862117	0.837254	0.788518	0.7992	0.885406	0.866939	0.859283	0.802584	0.861413
cg14329680		CTAGGGTTTAGAAACAGTGGCAAAGATGCAAAGTGTTCCACTGAGAACAATTGACAGTTT[CG]AATATGAGATAGGCTGCCACTTGAAGGAGAGGGAAGCTGAGACCTACCTGGCAGTTTAGA	0.546985	0.518311	0.607721	0.539887	0.534582	0.258949	0.295776	0.334299	0.324819	0.091854	0.571381	0.613826	0.534446	0.587376	0.205465	0.79483	0.804951	0.806145	0.788904	0.787145	0.789846	0.786459	0.734605	0.794701
cg13833632		GTAATATACAACTAATAATCCTTCCTCTGTCTGCTTCATAGGCTTGTCTTGGGTATCCAG[CG]TATATGAAAGTATTTGAAAAATGTAGGGCATGTACAAATATCTGCCAGCAGTGTCATTAA	0.481198	0.28754	0.420218	0.361487	0.301968	0.154617	0.167138	0.163528	0.192422	0.129669	0.17927	0.271568	0.260792	0.237287	0.164425	0.837485	0.857826	0.824428	0.841164	0.854955	0.819628	0.835748	0.780336	0.854072
cg16482344	LOC84856	CATGCCTTACAGGATATCTAGTTAAATAAGTCATTATAAATAGTTGCTCCGTGGGCTTTC[CG]CATTTCACCCTGCTCCAGGCAGCGTGGTCTGTATGGCTCCGCCCTGGGCAGGAGGAGAAA	0.566827	0.507864	0.491051	0.583955	0.426259	0.174181	0.164455	0.274447	0.245653	0.628134	0.48088	0.497747	0.603022	0.42513	0.262017	0.886077	0.873923	0.876857	0.8954	0.868862	0.839071	0.8686	0.842345	0.911835
cg05868469		CAGCAAGCACCCCGTCTTCAGGCCCTTTGTGCAAAGCTGAGGCTTCAGGGAACCCCAAAA[CG]CAATCCATGCCCTCAAGGAATTTACAGTGTCTTTGGAAAAAAGCACACATCTAGGCACAC	0.624665	0.590035	0.643861	0.640562	0.647723	0.344071	0.394972	0.397684	0.55082	0.357749	0.645872	0.702751	0.659852	0.652253	0.245887	0.824871	0.802249	0.797044	0.793165	0.812419	0.755477	0.816507	0.768761	0.824237
cg00234998	MRGPRE	ACTCTGCGCAGTCCGCCTGACCTCTCCTCTTGCGGACCAAGTGAGAGCAAGTTTCCCGCA[CG]TGGCCTTTGACCTGTCACTACATCAGCAGGCATCCCCCAGGGCACCGGCATCCTCCATCC	0.593705	0.549573	0.564445	0.600414	0.65234	0.442688	0.426079	0.218779	0.293128	0.637363	0.553744	0.608445	0.60343	0.612175	0.505111	0.828434	0.8248	0.795885	0.804387	0.790388	0.799342	0.830689	0.796045	0.818449
cg17814758		CATCTACCTTCAAATAAAATGTCAGCTCCTAATCTTGATCTGACTTTCTATGGTCTGGCC[CG]TATTTCCTTCCTTGTGCTGATTATGTGATACTTCCCTTGTCATTCAAGTTTTAACTCAAA	0.617966	0.54938	0.591919	0.62099	0.558294	0.235194	0.240953	0.369962	0.350208	0.494385	0.54159	0.61675	0.618718	0.554655	0.2737	0.814269	0.818677	0.83397	0.802193	0.814145	0.794131	0.807998	0.773628	0.842293
cg24384472	CSMD3	TACAAATTAAAAAAATGTAACTTTAAGATAAAGTTATAGTCTCTCCTGACACTCAAATAT[CG]ACACATTGCTAGTTCCTCCGTTATCCACTAGCATCGATTTAATGTGTATCTTTCCAGTTC	0.768829	0.775371	0.76461	0.743031	0.794804	0.433972	0.617975	0.635537	0.589105	0.643659	0.762167	0.794133	0.750592	0.751745	0.620265	0.883409	0.869503	0.864179	0.849329	0.851171	0.864182	0.881472	0.877777	0.877752
cg03995361	VIPR1	CCCAGAGAAGGTGGCAACTTCTGGAGAAGCAGACACAGCAGAAAAAACACAGATAGAGGG[CG]ATACTGATTAATTTTGGGTTGTCCCTGGTGATCAGGTATGAACTTGGGTCCCCATCACCC	0.63359	0.606147	0.616191	0.645263	0.581632	0.435764	0.412298	0.258718	0.208986	0.389921	0.635195	0.661622	0.688524	0.625578	0.464756	0.790442	0.778178	0.761355	0.77398	0.77519	0.754217	0.791627	0.752336	0.773515
cg27101095		AGTATGAAAGAAAAGGATTCCTATTTCAGAATCCCTTTGGGAAGCCTTTCAGTGAAGGCA[CG]GGGGTCTTGCGGTGTGCAGCCGAATTTCTACGGCCTCACGTGCTCTGCTTCTGTTTTCTC	0.646694	0.604838	0.62145	0.62378	0.686756	0.426001	0.263514	0.289314	0.466942	0.226362	0.622494	0.666045	0.630944	0.616255	0.369628	0.861273	0.869861	0.844092	0.85497	0.845244	0.862555	0.851576	0.818692	0.889423
cg02079034		TATCATGTAGATGCAGTTACTGAGATACACAGAGCCTAGAGGCTAGTAAAAGGCAGGGCC[CG]TTTGTGCCATAGCCTCCGGTGGAAGAGCGTGGGAGAACAATAGAACCCTTCCATGTGTAC	0.406095	0.493204	0.539206	0.38221	0.454734	0.148895	0.310789	0.149524	0.105439	0.0974509	0.500374	0.542256	0.350703	0.437955	0.0839376	0.835916	0.83618	0.839317	0.805665	0.828839	0.80882	0.854935	0.777229	0.844996
cg05643453	CASQ1	CACTCTCCTTGGAAGCATGCAGCCTGGGAAAACCTCCCTTCCCACTGTGCCCCAGAAAAC[CG]AGTCCCATAGGATCAGGGTAGGGAGTGCACACACAGGTGGCAACCAAAGGACAGACCCCT	0.428487	0.285184	0.354745	0.387798	0.267748	0.104664	0.164376	0.16379	0.141551	0.267392	0.327141	0.349545	0.385295	0.305804	0.536122	0.755663	0.751997	0.779038	0.762938	0.735658	0.754956	0.750135	0.688037	0.723526
cg16558307		AGGGCGGCTCTGGTGACCTTGGCTCTTGCTCTGTGTGAGCCAGGAGCCATGTGAGGGTTT[CG]AGCAGAGGAGTAACATGGTCTGATTTCATTGTTTTGGGCTGGAGGGACTGGAAGATGGAG	0.65603	0.564448	0.622422	0.641591	0.650535	0.236188	0.414738	0.297443	0.417494	0.352938	0.580084	0.624771	0.637439	0.657067	0.268735	0.846988	0.879885	0.877098	0.85541	0.853976	0.868608	0.854794	0.817917	0.845711
cg22145666	UGT1A10	GCTTGCGGTACGCCTTCTTGATACCCTCGGACGAGGCCTACCGGGGTACTCCCAGCACCT[CG]TAGTAGTCCACTATGCTGGACTGCCAAAGAGCCTGCGGGGCACTGGCACAGCGAGCGGCA	0.669435	0.651496	0.609239	0.632143	0.643046	0.426812	0.549884	0.384777	0.387402	0.468536	0.648458	0.654404	0.663797	0.634313	0.550926	0.806321	0.79815	0.797621	0.774092	0.814333	0.776497	0.808117	0.767786	0.809823
cg17898124	KCND3	TGCCTCCACTTTTGTATCACAACCCAGGAGGCAGCATAGTGAACTGCATCAGTAGGTGCT[CG]AGCTGGGACCCCTGGTTTTATATGTGCCATTTTTTTTCCCATCAACTTTACTCTATGCCT	0.492795	0.42916	0.470194	0.522609	0.375991	0.119099	0.211168	0.129355	NA	0.0938374	0.477862	0.475057	0.546736	0.476905	0.11846	0.801599	0.798794	0.827161	0.790724	0.81072	0.795024	0.782905	0.74557	0.793623
cg11081307	ZNF831	GCTGTTTTCATCTTGAGAGTAGCGGGTTAGTCAGTAGGGCCCCAGGGGTGTGGGGGCTCC[CG]GGGAGGTGGATTTAGGGGATAGTAAAGGGGCTGGTCACCGTGTTTCTTTGGCCTCCAGTT	0.653501	0.673251	0.659604	0.695227	0.711072	0.474148	0.487579	0.539874	0.409136	0.381452	0.663117	0.695233	0.714023	0.686404	0.506805	0.854562	0.834714	0.846355	0.838375	0.832356	0.833263	0.82085	0.809589	0.835983
cg02345089		TATCATCCTACAGATGAGCAAACTGAGGCACTGGTAACTTGCCCAAGGTCACACCTAGAA[CG]TGATGCAGCTGGAATGTATGCAGGCTCTCCGGCCCCAGAGTACATGTCCTTCACCATTAC	0.490472	0.462667	0.535489	0.558869	0.483937	0.213335	0.358505	0.252469	0.293297	0.111373	0.525299	0.55768	0.593292	0.503553	0.281071	0.780732	0.792127	0.786565	0.79229	0.781002	0.785618	0.793889	0.719677	0.791647
cg20326682	PRKCA	CTGGGCTTTTGCTGTTCTCCCCTGAGGATGAATATGCTGCCTGCCTACCCTGCTACCCCC[CG]CATTTGGCAAGGTTGCACATGTCTTAGGGATGGAAAACCAGTAGCCAACACTAAACCAGG	0.362806	0.331778	0.507607	0.427281	0.373441	0.132933	0.239415	0.111021	0.107249	0.708857	0.411952	0.479508	0.458814	0.371711	0.54501	0.78873	0.77577	0.807937	0.759631	0.782612	0.758013	0.794691	0.744845	0.786817
cg24854175	CTNNA1	TGTAGCTAAGTCTAGTGACTTACTGCCTGCCATTTGGTTTGACCTTCATTTTGTGACTAT[CG]TACCACTAACCACAGCCAGTCACCTCTCATGTATGTGTTGTTATTCTCATGGCAAACACT	0.574299	0.495378	0.472103	0.582438	0.589091	0.360199	0.397228	0.222775	0.242274	0.518117	0.392372	0.449584	0.56377	0.465292	0.396242	0.86748	0.84373	0.830634	0.882414	0.846168	0.883366	0.829651	0.828964	0.868782
cg12624721		CGACGCATGCACCTGCTGATGGAGAATCCACGCCGGTAAACCTCAGGCTGGGCGTGGCCT[CG]GCCCGGTGCTTCTGTTCCCCCATAGACACCCTAGAGAGTGGTGCCCCGCATACTCAAGGA	0.713917	0.64175	0.705248	0.716447	0.734408	0.536206	0.525333	0.342646	0.325636	0.48304	0.685382	0.732762	0.702808	0.721178	0.55125	0.946658	0.952127	0.957681	0.940801	0.958708	0.934267	0.93478	0.889836	0.950368
cg07541701		CGCAGGGCGGGTGCTGACGAGCCGGGAGCGGGCTCCCTGCCTGCGGCAGCCGGGATGGCC[CG]CTGGGGACACCGGAGAAAGCCTGTTTTAAATTTAATCCGAACTTGACGGTGTGGATTGAA	0.286644	0.392519	0.342387	0.384159	0.353684	0.100948	0.182705	0.0852012	0.106001	0.377647	0.378343	0.387433	0.387429	0.342673	0.490142	0.0848892	0.0812342	0.0825838	0.0993936	0.0926552	0.0770075	0.113359	0.138248	0.0961637
cg25469406		AAAACATGATGGAGCTAGGCCACTGGAAACCCTGGGTACTGCTCTCATCAAAACATGAAA[CG]GTTGGTCCTTCACTGAGATCCCAAAGATCGAAGTCCTGGGCCTACTGCCCAGACAATTAG	0.594796	0.547807	0.62756	0.603742	0.516088	0.341551	0.315811	0.369653	0.404363	0.116538	0.59152	0.636958	0.608128	0.578972	0.268821	0.865631	0.850945	0.87919	0.875531	0.841912	0.828867	0.842774	0.806369	0.857163
cg17746570	RCVRN	AAGGAATTCACCATCATCATTCTTTCCAAAGTACTTCCAGATCTTCTCGGCTCGCTTTTC[CG]GCGTGTTTTCATCGTCTGGAAGGAGCTTCACGTCCTCGGGAGTGATCATTTTGAAAATAG	0.340514	0.301808	0.476576	0.511276	0.429986	0.116375	0.0898339	0.0778451	0.076278	0.061924	0.309646	0.476068	0.500935	0.307057	0.061504	0.931564	0.93647	0.933918	0.934173	0.908728	0.933203	0.929247	0.851044	0.925951
cg09487101	EFNA2	GGGCTGAGGCGGCCCCCCCCCACTCTTCTGCTACTGGTCACTTTCTCTCCGTTTTCCAGC[CG]CTTCCTGTGCCGACCGAGCCGCCCTCTGGAGCCCGCCACCCCTCCTTGTCCCCTCTGTCT	0.515979	0.406158	0.441134	0.382945	0.379396	0.139032	0.116319	0.213294	0.212952	0.0742528	0.343958	0.443598	0.389967	0.392309	0.224606	0.916305	0.916207	0.94139	0.929439	0.931056	0.918076	0.922725	0.763252	0.913714
cg19795338	ATP13A4	CAATAAACAGTGCCTGAGCACAGGGACTACCTAAAAAAGTTAAGTCATATTTGCTACCCT[CG]TGTTGATGTAAGGATTCAAACATCCAAACAAATATGATAGAAAGTGGATTGTTATTATAA	0.50662	0.564857	0.601481	0.612788	0.600237	0.216398	0.410075	0.270643	0.278616	0.374493	0.587748	0.609879	0.606286	0.568027	0.394096	0.861021	0.87585	0.848003	0.836211	0.856467	0.848073	0.849941	0.796627	0.839516
cg02362508	NRSN1	CTTTCATGCCTTCCTGTATCCCCTATGAGTCTGACTGAATCTTTTAAGGAACTGACCTTT[CG]GCTTGGTGTTGAATAAGTGGTCTAAATTGTCTATGTGCCTGTACTTTGTCTTTTGCAGCA	0.494486	0.532686	0.629565	0.522413	0.566344	0.202896	0.285671	0.243403	0.449885	0.124425	0.553041	0.598812	0.520814	0.539843	0.233188	0.85401	0.83651	0.880478	0.854763	0.862561	0.858205	0.849067	0.810052	0.830538
cg17281677	IFFO1	AAAGGGGGAAGAGCAAGGAAAAGGGAAAGGGCAGAAAAAAATCCGTGCTCAAGAGCCCAG[CG]GGCCCAAACTGAGGGCCAGGAGGCCTAGGCAGCTTAGAAACTGGGACTGGGACATTAATA	0.661703	0.661295	0.681102	0.655436	0.617433	0.340567	0.403928	0.458787	0.298775	0.176215	0.678748	0.70127	0.62731	0.639207	0.303559	0.836361	0.819307	0.838541	0.810664	0.826702	0.819213	0.826071	0.786303	0.835235
cg24445116		TTGATGTTATAATGAGATGAAACTTTTGGGTCTAGGGGTGAGAACACTTTGCCAGATGAC[CG]TGCTTTGGGCTCAGGAAAGCCCTTGACCAGAGCCTGGTTCTGCTTCCTGGGTCCACAGTC	0.563757	0.505077	0.548181	0.532842	0.50473	0.23097	0.26856	0.279874	0.296226	0.34747	0.560747	0.582582	0.55724	0.535732	0.23792	0.767839	0.770153	0.772785	0.734843	0.734249	0.732988	0.744968	0.689145	0.76481
cg09517033		TTAAAATTATTAGGATAATAGATCTCGTGTCAAGAATTCTTACCAAAATGAAGCAAAATT[CG]CACACAAAAAAAGAATAAGCAAGGATGGATTCCAGTCCCCAGTCCTCAAATGAAGGGTTG	0.568029	0.589307	0.588837	0.640272	0.571384	0.200908	0.315152	0.432565	0.24604	0.199997	0.582932	0.555471	0.655276	0.617599	0.372036	0.853873	0.857224	0.792021	0.829113	0.849569	0.841358	0.854263	0.77072	0.853947
cg11365072	KIF4B	CTCAGTCTATGGCTTCTCTTCTTATTCTCTTGACAGTTTTGTTTGAAGAGCAGAAGTTTT[CG]ATTTTAATGAAACTTATTAATGATTTATTTCATGGATTGTGCCTTTGGTGTTATATCTAA	0.484277	0.355772	0.377397	0.388007	0.292388	0.118822	0.151051	0.135534	0.207738	0.199472	0.439085	0.378654	0.389735	0.353658	0.364888	0.781576	0.81701	0.777892	0.773918	0.809599	0.772217	0.767009	0.722653	0.789804
cg15016120	DCD	AGCTCTGGAGTTGGCACTGTCCTGACTGGCATCCTTTTCCTGCCTCTCCCCTTCCCATCT[CG]CTTGTCCCTGGGCTCCCATCTCTGATTGCATCTGGGGTCCTGGGGAAGACTGTGAGAGGT	0.39355	0.393144	0.427855	0.504596	0.403313	0.138408	0.231628	0.203706	0.28556	0.234625	0.451757	0.440503	0.548866	0.421641	0.112578	0.721369	0.738496	0.720967	0.694098	0.714777	0.708402	0.721588	0.660152	0.714434
cg15256387	ETV1	AACTCTTTGATCTTCATAGTAACTGAAAATGATGTTCTCGTGTGAATAAGCAGCTAGTCT[CG]CTACAGCTCGGTTTTGTTGAAACAGCCTAAAATTTTGAGATAAATGTGTCCCTCTTGACT	0.504077	0.339966	0.443769	0.453234	0.350686	0.146997	0.266073	0.20806	0.184349	0.140082	0.337775	0.485378	0.476176	0.293107	0.184044	0.854952	0.796203	0.81919	0.817794	0.853425	0.838083	0.822302	0.797458	0.768998
cg23875854	PRKCQ	AGAAAGGCCACCACCATCTCCACGAGAAGGTCCTAAGTCTTTGTTACTAACCTATCAGGC[CG]TAACTCAGTTTCTTGGAGGGCAAAGAGTCCCTTTGGATGACTATTTTCTTGGGAATTATT	0.734925	0.686866	0.720357	0.739526	0.706737	0.527318	0.380274	0.285969	0.577191	0.279142	0.713138	0.756443	0.786438	0.723406	0.507699	0.866033	0.859076	0.870169	0.872088	0.875929	0.846818	0.853236	0.831892	0.857392
cg11375831	SERPINI2	CAGATCACAATGTGATTTATCCAGAAATAGTCCATTACTTTTCCTACCAATGGCAGAGAC[CG]TCACTCTGTCCTACTAAGACCATTTAATGAAATTGTTCTGTAAGGACCTTATATTAGAGC	0.712261	0.645358	0.692569	0.686926	0.63286	0.277161	0.437997	0.34952	0.508397	0.193388	0.680638	0.685546	0.702873	0.665301	0.277797	0.870604	0.875777	0.893055	0.8635	0.887085	0.867064	0.873834	0.843793	0.884531
cg16792062	ETS1	AAGTCTGGTTTTAGGCAATCTCTAAAATAAGGATACTTTTAGCAGCCCTGACTCATGGTC[CG]TGGTGCAGGAATAAAAGGGCAGAAGTGTTCATACATTTCTCATTTAGGGAAAATGTAAAC	0.666011	0.646705	0.626012	0.668104	0.688878	0.336272	0.538035	0.32871	0.263473	0.53152	0.657626	0.659393	0.65994	0.670705	0.388823	0.863763	0.851955	0.792385	0.832451	0.841794	0.838687	0.846177	0.795785	0.852952
cg03008515	OR11H6	ATCTTGGGATCTTACACTCTGGTCATCAGAGCTGTGCTTTGTATTCCCTCTGGTGCTGGT[CG]AACTAAAGCTTTCTCCACATGTGGGTCCCACCTAATGGTGGTGTCTCTATTCTATGGAAC	0.456135	0.433711	0.4266	0.446659	0.424166	0.0989578	0.329584	0.174697	0.0897088	0.19882	0.445454	0.446543	0.449309	0.401734	0.356586	0.666602	0.689546	0.726415	0.705302	0.676136	0.658203	0.668348	0.586519	0.686216
cg17127329		ACCTTATACAAAAATTAACTCAAGATGGATTAAAGATGCTCTCAAGTCACTCCAGCACAG[CG]TTGGTGCTGCCTGGGTATCAGAAAGCAAGCTCACATTGCTCTCCAGTACGTGTAAGCCTT	0.589259	0.545936	0.584815	0.602375	0.613288	0.336253	0.460688	0.36499	0.329414	0.258338	0.611139	0.581002	0.610626	0.644505	0.364728	0.793938	0.801828	0.801436	0.806011	0.819097	0.799032	0.771917	0.783607	NA
cg08273233	HTR1E	TGGAACACAAGAGACCACATAGCTGAACAAATTATAGCCTCCTTACAAGTGAGAAACCTT[CG]AGGCTACATAGTTTTCAGCCAAAGGAAAATAACCAACAGCTTCTCCACAGTGTAGACTGA	0.425409	0.263464	0.326684	0.454046	0.288969	0.0639423	0.0887167	0.094885	0.132785	0.26317	0.244726	0.331001	0.457664	0.240908	0.104807	0.793589	0.807309	0.817803	0.796599	0.816226	0.788963	0.815786	0.760773	0.829489
cg23634624	DENND2A	TACATGTGAATTCAGGATGGTGCTCACACTTAAAGAGTAGTAACTTTTCTTGTTAAATGT[CG]GCCTTAAGGCATTCTTGCCAGAGCTATTAAGTGTATGCCATAAAACACATATAACCAAGT	0.536291	0.544953	0.569392	0.613506	0.469594	0.409811	0.306421	0.286347	0.339497	0.430732	0.555164	0.547598	0.613132	0.516967	0.608444	0.861761	0.874577	0.875092	0.825952	0.857945	0.861795	0.865837	0.805125	0.849858
cg19654437	CDK15	TGTGGCCAGAACAAGAACCTTAACTGTGCCAAATTTTATTCTATTCAATAACAGCTGCCT[CG]TTTTCAGTTGTGCACATCTGAATGCAAGCAATCCCTGTCTGATGTGGAGTTTCTTGCACT	0.500531	0.475989	0.407393	0.382244	0.408433	0.182182	0.18533	0.181074	0.22947	0.0868499	0.476725	0.401369	0.374362	0.516937	0.0840385	0.802182	0.796392	0.78029	0.805264	0.781496	0.775169	0.755974	0.691386	0.715227
cg02373493	C7orf34	CTCCCCATCTTTATTTTCTGGCAGACCCATGCTTCATGTAGAGCAGCATGTTCATACCCA[CG]ACTTGAGAATCCTGTCCGGCTCATCTGTTCTGGGCCTCATCCTATGCAAACCACTCTTGT	0.666868	0.584306	0.622326	0.62336	0.619798	0.438017	0.468072	0.338767	0.353104	0.490096	0.619577	0.617214	0.629158	0.625763	0.622893	0.834517	0.803166	0.817768	0.814471	0.805484	0.79683	0.804401	0.77135	0.80276
cg19086570		CTACTATTAATAGGTATTTTAAACTGTAATCATTAAAAACAGAAGTGCTACATCACCTTT[CG]CCCTGACTCTCGAAGTGAACATAAAGACACACCAAAAGGTTGAAAACAAAGCTAGCTGGG	0.574067	0.53756	0.525224	0.584601	0.648827	0.231391	0.354266	0.423776	0.287699	0.201484	0.536799	0.555984	0.576042	0.635122	0.317437	0.846816	0.855579	0.859977	0.848243	0.858339	0.83007	0.855501	0.819283	0.890635
cg18162059	STK32B	CCATATGGGTCCCAAGACTGTAAGGATAAGTACATAGTAATGCACTTTAAAGCTGTTCTA[CG]TGTCCTGGGGAAGATTGTAGTGAGATTCTTTCCAGCGAGCTGCCAGAAATGGGGTTTCTG	0.5597	0.507734	0.496374	0.522583	0.566006	0.228299	0.313358	0.321661	0.282371	0.16657	0.549785	0.522556	0.53144	0.601275	0.130662	0.748319	0.745709	0.737942	0.74502	0.730545	0.714553	0.726866	0.693059	0.748513
cg11201869	HULC	CCAACTGGGACCCATTAGCCCCTCTTACCACCTGTTAGCCTCCATCTTTGATTATGGAAT[CG]ATTTGCTGGAGAAGCTGGAGCTTTTCCTCATGGAGCTAAATCTGCTGCTGCCATGGGTGT	0.54511	0.408701	0.521155	0.541931	0.449741	0.130068	0.205338	0.123874	0.317634	0.102984	0.494742	0.564822	0.570602	0.510318	0.186705	0.858281	0.841728	0.870731	0.833994	0.842888	0.838042	0.830961	0.790514	0.847953
cg17145652	RNF170	GTTAGCTTTGTTGCACTCCAAATAAAAATTTGGCATTGGGTGGTAGTTATGCATACTCTA[CG]CATCGACAATTCTCTAAGGACTCCAAAGTGCATGTCCTGGAAATTCCAACATATTTGCAC	0.639718	0.499747	0.566354	0.487259	0.538513	0.27526	0.269547	0.264906	0.380547	0.444335	0.508382	0.576844	0.474623	0.535122	0.675539	0.886214	0.855162	0.868612	0.860876	0.864979	0.858606	0.876293	0.843087	0.888142
cg16264595		AGCACCAGATCCTGTGCTGCAGACCCCCACACTCAGAGCTCAGGGTCTTGCTGGGACAAT[CG]GACAAGCAATGGCAGTCTAATCCAGTGGGATGAGGGAGTAAGAGGCCACGGAGGAGGAGC	0.452174	0.556279	0.561142	0.588887	0.550356	0.227503	0.428356	0.31959	0.311132	0.174531	0.550064	0.561197	0.61246	0.585418	0.26925	0.834006	0.835666	0.832921	0.822558	0.835039	0.832848	0.832614	0.797365	0.852776
cg13978352	DPCR1	GTGGGTTGGGGTGGCTCCATTTGTTTAAGACTTAGTCCTGAGGAGCCCCAGCCCCCATGA[CG]TCAAGATTGGCTCCATATAAGGTGAGGGGTCCGCAGCCCATGGTCCCCAAGCAGCCACCC	0.464288	0.421539	0.487205	0.519869	0.417672	0.127211	0.316945	0.222655	0.196607	0.319578	0.425619	0.489971	0.545633	0.388593	0.219065	0.733167	0.713876	0.738214	0.731176	0.720159	0.69735	0.730401	0.676663	0.727904
cg02170784	SOX8	GGTCTCTGGGAGGGGCCTCGGGTCTTCTCATAGCACAGCGCTTCATGGAATTTTCTCGGC[CG]AGGAGTGAGGTCTAGGTCTGACTTTGCTGGAATTTCTGGGAAATGTAAAGAAACAAAAAG	0.448371	0.290672	0.35981	0.434958	0.457027	0.115445	0.163448	0.192154	0.174155	0.786362	0.296734	0.385628	0.450621	0.347929	0.577884	0.845307	0.825944	0.837582	0.811454	0.827081	0.817827	0.814673	0.742596	0.818186
cg02435573		GGTGGTGAAAAGGTGAGATAAACTAGGACAAATCAGAGGGGCTGAAAGACAAGGGAGGAA[CG]TCCTTGGCTGCTCTGTTTAAACCAAGGCAAGATCCTCCCTGGGAACACCGGGTTTCTATC	0.420065	0.302007	0.467041	0.403776	0.420203	0.122616	0.149088	0.0534454	0.0839455	0.0588172	0.354501	0.496779	0.425547	0.354272	0.0672814	0.0892508	0.0830368	0.0989026	0.0955195	0.091626	0.123127	0.0970599	0.0848065	0.0908734
cg04161859	CDH23	GTCAGAAGGAGGCTCTTACACATCACAGGCCGCCTGCCCAGTTGGAGGGGAGTCTGGGGG[CG]CAGGTGATCCCCTTGCCCCAAGTGCAGGCAGGAAGAGGAAGTAGAATCACTTTCTGAGCA	0.473449	0.420522	0.510302	0.472762	0.440917	0.134242	0.211924	0.246978	0.20372	0.128259	0.449945	0.529059	0.478281	0.458089	0.196599	0.6812	0.700277	0.684691	0.661815	0.695789	0.673503	0.683787	0.637758	0.692369
cg21287356		TCTGGGATGTTAAAACTTCATGATGTATAGTGGCCAAACAGAGAACCCCTGCCAACACAA[CG]AGTTTAAAAAAGCTCATCTAGAAAATGCATGTAAGAGCTGATCACTCAGTGTTTTGAGCC	0.373469	0.317103	0.341361	0.434097	0.231221	0.105402	0.128017	0.126092	0.165198	0.122775	0.339941	0.384743	0.428051	0.293319	0.183944	0.810074	0.78828	0.788606	0.776216	0.806642	0.800227	0.790175	0.70739	0.82235
cg13650974	GLB1L2	CTCTGCGGATGTCAGGGGACGCTCTGAGTGGTGATTGTCGTCACTGCCCCTCAAGCACAG[CG]TTTCTTCCACTTCACTCTCTGCTTTACAGCTGGGAGGATGCTTCCTGCTGTTCTGGGCAT	0.531187	0.550786	0.510524	0.475317	0.479301	0.302738	0.366959	0.198838	0.260773	0.273235	0.552363	0.508052	0.499478	0.499299	0.272021	0.798411	0.793529	0.806603	0.794084	0.75267	0.769038	0.804316	0.70352	0.777141
cg27526098	OR11A1	CGAATAAGACAAAGTTACTCCTCTCCAACCCATCCTGGAAGAGTCCCCAGTGGAGGTGTC[CG]AAGTCCAAAATAACATCTTCATTACTCTCCTTCAATCAAGTGTTTCAGTTTGTTTGATAC	0.695247	0.654229	0.714597	0.691174	0.733447	0.339355	0.515054	0.443133	0.509262	0.451505	0.686461	0.739885	0.663574	0.720843	0.454449	0.887248	0.88223	0.878488	0.86123	0.873182	0.887963	0.861363	0.846575	0.864482
cg13357341	ARNT	AGGACTTTTGTCCCTGGTGAAAAAGTTAAATGACTAACTTTTGAATGCCTGCTATGGAAC[CG]GTAGTCTAAAAGGATCCAGGTGTTAACGGTTTGGTATGGGAGATATTGCCAGCCAAAATT	0.39627	0.369868	0.438932	0.516797	0.46449	0.208007	0.204973	0.178865	0.190228	0.327507	0.378605	0.46484	0.508714	0.376976	0.5006	0.777746	0.744492	0.777337	0.793484	0.759886	0.748629	0.760841	0.715557	0.770561
cg12479516	GRM7	GCCTGGCCACAGCCGGGGTTGGCTTATCACCTCAGTCCACCATGTATATGCTTCTCACTC[CG]AGGTCAACAATTTCACTGTAAGCTGAGTTACCTGTCATAAGTGACTCCATTTTGAGACAT	0.728305	0.635108	0.670752	0.696668	0.666905	0.252454	0.503544	0.471893	0.489202	0.382529	0.656713	0.694635	0.688133	0.704113	0.563176	0.881902	0.842337	0.871123	0.844708	0.843763	0.852315	0.866247	0.854348	0.868354
cg24788028	ZNF536	TCCCTGTGCTGTCTTCCCTAATGCCAAAATGGACTTGGCAATGAGTGGAGGCTTCTTAGT[CG]CCCCAGCCTGGATGCCCTAACCAAGTTTGGGTCTACTTTTTATGTTTTTTTAAAGACAAA	0.624165	0.507155	0.560031	0.598988	0.544918	0.214316	0.313113	0.158748	0.392595	0.296056	0.591377	0.566794	0.587793	0.599232	0.230282	0.875594	0.869428	0.848256	0.862396	0.862929	0.854509	0.842398	0.793209	0.859841
cg00297912	TFB1M	ATCGTCCAAAACACAGTATACCTGACAAAGCATTATTTCACAGTTATATTCATTATTTCC[CG]TACTCCTCACAATGGTCCCATGTGAATGAGATTATTATTCTTAGTTTGCTGTGAAGAAAT	0.507854	0.437043	0.412711	0.272537	0.410066	0.139923	0.179882	0.126815	0.209082	0.0959154	0.422491	0.402256	0.282981	0.399624	0.128764	0.860307	0.831705	0.813688	0.855597	0.843199	0.835905	0.842561	0.839551	0.83387
cg00048370		TTGCTCATGCCTCTGAGGTTATGGTAATATTTTATCCATCTTTCTTCATGAAGACACAGT[CG]CTGCTGCTATTGACAACCGGAGGCCAGCACTGAGGAGTGACGTGGGCAGGGGGCCAGGGG	0.40634	0.312541	0.436549	0.50658	0.332696	0.17368	0.204924	0.137783	0.134705	0.488006	0.341664	0.436075	0.491474	0.29749	0.270024	0.843184	0.849095	0.839876	0.85107	0.839868	0.837623	0.83364	0.794177	0.789044
cg25773630	GPR158	AGTCAGGAGGTTATTTTTCCAGATTGATAACCATAGAAAGTGAATAAACACTTTTAAGGT[CG]CAAACATTTGCTAGGTTGTCCTTCTCAATGCATGTGCAGGCTGCATCCTGTCCTTGTTTT	0.561962	0.553545	0.67474	0.595866	0.560345	0.202662	0.294609	0.3993	0.211331	0.175182	0.589922	0.618719	0.624975	0.583828	0.181708	0.865342	0.866449	0.869618	0.839161	0.872271	0.855388	0.866238	0.841162	0.906516
cg12944530	CFLAR	TGAAACCAGTAGGGGGATAGCGTATAGCATAAGTAAAGCTTTTTGGACATCAACAAACTG[CG]ATAATCTACAACAGACAGCGGGCTCTGGAAGGTTTGACCTGCTTTAGAGAGAGATTTCCG	0.513622	0.578111	0.416189	0.53756	0.58448	0.395754	0.0863612	0.201479	0.091605	0.183642	0.526311	0.455648	0.539884	0.526096	0.524373	0.891813	0.865446	0.874814	0.859906	0.867289	0.858945	0.854665	0.878208	0.896185
cg26681383	CACNA2D3	TCACCTCCTCTCCCAACTTGTCCTTTAAAATATATGTATAGAAAGAAAGGCCTTAAAAGG[CG]TTAAACCACGTTTTTCTAAGACAAAAGATCAGTCTTATTTTGTGACATGTGATTCAGGGT	0.535663	0.486996	0.580627	0.543911	0.523674	0.0842014	0.240809	0.132939	0.166995	0.0888107	0.602769	0.664555	0.519218	0.537032	0.142574	0.816322	0.814015	0.850868	0.847978	0.827738	0.814655	0.834318	0.731469	0.800369
cg19172468	CAPN11	TTCTTGTAGCCCTCAGCTCTCCGGTCTCTGCTGATGAAATGGGCTCCAGGTGGCAGTGCC[CG]GGTCCCAGGTGCCGTGTTTACTGCAGCAGTGGGACCTCCGTGCCCACTCCCCCAGCTCAG	0.573698	0.564344	0.586317	0.658281	0.635413	0.335267	0.43627	0.338472	0.426352	0.709603	0.555236	0.617506	0.659182	0.635883	0.733058	0.810067	0.79651	0.785324	0.788985	0.820979	0.798265	0.82403	0.853375	0.807943
cg08229058		GGTTAACTCATTGAATTCTCATAATAACCTTAAGAGGTGGGTACTATACAGTCAGCCCTC[CG]AATCCATGCATTAAACCAACTGGGGATTGAAAGTATTTGGAAAAAAATATGGATGGCCGG	0.605799	0.507253	0.59867	0.563137	0.614005	0.312103	0.28321	0.495418	0.346509	0.33179	0.586801	0.619242	0.629549	0.626461	0.337616	0.829811	0.818543	0.808143	0.783335	0.844596	0.821915	0.800359	0.797512	0.810542
cg05719818	ABLIM2	TGGATCCAGGTGATTCTTGGGGCATCAAGTGCCCCCGGTGATGTCCCTGATAGTCACCCA[CG]TCCTTGGACAGAGTCTCAGCATCTCTGAAGGTCGGGGCTGGGGTCTGCCTTAGCCCAAGG	0.300544	0.299758	0.343783	0.463152	0.288071	0.110163	0.212758	0.111987	0.0983436	0.106694	0.365908	0.405911	0.456196	0.268632	0.130433	0.754081	0.745292	0.792911	0.758119	0.76047	0.733452	0.744522	0.686051	0.770523
cg20185945	ZP4	CACATAATGCTACCAGGAGTTCCTGCCGGCTGCAGACTCTCCGCCTCCTCTCCCAAGAGC[CG]AGGGTCTGCCTGCCCAGATTCCTTTATATACAGAAGTCAGGCTTGTTTTCAGCTGCACAT	0.506312	0.448767	0.485445	0.586743	0.521183	0.104069	0.330792	0.297713	0.145636	0.351454	0.469582	0.541208	0.586224	0.513314	0.285133	0.810802	0.816833	0.797966	0.811705	0.815476	0.789194	0.797757	0.762411	0.837218
cg09030852	CLCN3	TCCCATTCTCTAGTTTTTACTAGTAGCCAGCCAAAGAAAAGAAAAAGGAGGTCAGAATTT[CG]GTATTTACATAGAAATTTAAGGGGAAAAGGCCAGGCATGTTTTTAAAGTGTGGAAATTAA	0.623777	0.619907	0.68336	0.646831	0.598446	0.479665	0.347204	0.127198	0.132581	0.448476	0.62944	0.694068	0.638267	0.544888	0.667295	0.84565	0.852001	0.865156	0.813066	0.852128	0.837982	0.851502	0.797554	0.84713
cg15699050		ATGGAAGCAGAGGTGAGTGGGCCCCCCAACAAAGTGGTCACCAGTCCCTCATCTGCCTCC[CG]CTGCCTGACGCAGCTCCATCCTGATTCTGAAGGACATTTTTGGAGATGAGATCACTTTTG	0.400239	0.466367	0.524466	0.316099	0.362115	0.113926	0.229988	0.227591	0.140183	0.551451	0.500029	0.534532	0.296263	0.433827	0.156592	0.861026	0.86045	0.859689	0.845813	0.847676	0.853986	0.859051	0.809302	0.842172
cg10282330		TTAAAGTGGGTCACAGGACAAGGCAGAGTCAATGTGAGAGAGTCTAAACAAAGATATGAA[CG]TGTAGAGGTGTGATTCATTGAAGCCATCTCTGCAGATGCTACAACATATGATGATACCAT	0.444621	0.452383	0.417253	0.448342	0.314109	0.126607	0.287598	0.19282	0.206781	0.14182	0.479457	0.433357	0.457906	0.398454	0.220509	0.723318	0.736945	0.70874	0.730055	0.720011	0.707731	0.72419	0.69516	0.747839
cg06395652	PCDH15	CCTCTTCTGTAGTCTCAGACTCACTGAACTCAGACTCTTCTTCACTGTATTCAGTATAGT[CG]CTGGAGGATTCCTCCTCTGATTCTACAGTGCTTTCTGTTGCTTCCTCTTGGTCCAGAGTG	0.634841	0.542018	0.637817	0.580568	0.648392	0.32098	0.318099	0.383519	0.359049	0.210208	0.577654	0.647146	0.548237	0.639876	0.209441	0.885272	0.866175	0.883826	0.846262	0.871696	0.874347	0.880247	0.82829	0.86599
cg08882389	HLA-DRA	TATGGGTTTGATCCTATCTTGTTGTGCTCAAGTCTTGTCTCTGTCATCCATGGTCTCCTA[CG]AAGTCATTGCCCTAAGTTCATGCTGGGGGAGCCAGAAGGGAAGTCCTTGGATATCTTATA	0.376945	0.353516	0.410365	0.381731	0.363977	0.235702	0.120882	0.0982454	0.171718	0.128847	0.401552	0.423154	0.398791	0.364585	0.335459	0.818579	0.806161	0.851044	0.812492	0.687107	0.698222	0.794471	0.762675	0.618756
cg13886180	LOC728606	CAATTAGATACTTTAGTCTTTCTTTACTGGCAAGGAGTGAGAATGTGCAGACAGGCAAAG[CG]TGTTAATGCTGGTGCAGCCCCCTCTGCTTAGAAGGAGGTTCAGGAATCAGGTACAAGTAT	0.537593	0.571916	0.575973	0.6233	0.589036	0.320409	0.376192	0.317626	0.427942	0.390927	0.614332	0.581299	0.637952	0.589956	0.524478	0.779181	0.77479	0.787635	0.776493	0.785043	0.781846	0.783224	0.735665	0.788267
cg03300099	SMR3A	GTGGGAAGAGATAATCTAAGGTAAGATACTCAAAAAAGGATTTCAGGCAGCACTGAAGGA[CG]CTAACTTTCTGATGGTACAGTGCTTGTGACATCCTCTAGCATTGTTAAGAACCTGGAACT	0.582543	0.51243	0.581274	0.598609	0.500137	0.262461	0.300422	0.284246	0.299516	0.153709	0.571773	0.617275	0.576609	0.545031	0.254351	0.854735	0.84833	0.858758	0.855555	0.861451	0.843733	0.846213	0.775983	0.844424
cg19765377	MAT1A	CCCTGCGTCTCATCTGGATTGGTCTCTTCCCATTCTATCTTCTCAGGGAGAGCAGGAGCA[CG]CACCTGTATTCTGAGCCAGCTGTGATGTTACACAACAGATTCATTTTAGAGGAAAAGCTT	0.397927	0.365559	0.35956	0.377011	0.358706	0.131861	0.193425	0.227666	0.108613	0.199103	0.371742	0.368144	0.384906	0.334598	0.317675	0.395211	0.39173	0.399595	0.388373	0.361793	0.341835	0.474085	0.510327	0.478332
cg23970546		CAGAAAACATGAGACTGCTGGACCAGAGGCAAAGGTATATTTCTGTGAATCCCTCTAATC[CG]TAAATATCATGAGGGGATACAGAAAAGCCTAGGTGCATGCCTGCCCAGGTAGTAGGTTGT	0.40404	0.414835	0.42468	0.436134	0.496396	0.138187	0.194555	0.186507	0.346847	0.115289	0.451161	0.446863	0.457804	0.494429	0.117513	0.66791	0.682548	0.663624	0.672006	0.638319	0.642556	0.612624	0.662958	0.64357
cg06493930	GAS2	CCAGCCTGTCTTTGATATTGATCAATGAACTCCTTCTCAAGGAATGCTTTCCTCTAACTG[CG]GTGAAGGTGGTGGCTCTGGTGGTTCTCTCCAACATGGGTGTCTGGGTTTTGACTGCCTAA	0.225498	0.310862	0.304823	0.408288	0.445167	0.107519	0.110878	0.117576	0.136351	0.267348	0.302778	0.308304	0.425935	0.312211	0.46046	0.794478	0.803053	0.848495	0.825702	0.788651	0.819422	0.797551	0.754484	0.797234
cg02788731	OR2G2	TTGAAGAACAGCTAAGATATTTGAAGGATGTGTATTGCATTTATTTATAATGCACATATT[CG]GAAAATAAATAGATCTAAGTCACTGGATGTAAAGACATAGCTTCTAAGCATTTAACATAC	0.622227	0.551853	0.587697	0.618134	0.605821	0.341041	0.313445	0.413881	0.451746	0.245308	0.612291	0.61337	0.636192	0.626772	0.280097	0.858761	0.81776	0.837071	0.847297	0.854128	0.841126	0.82313	0.76499	0.854587
cg07748767	MERTK	CTTGAACACACATGTGAAACAGTCGCTTTCCATATAATAGCCAGAATGAGATTTTGGAAA[CG]AATCTGATTGTATTTTCCATTTGAAAATCTTCCAGTGGCTTCCTGTTCCCTACTAGAATT	0.422158	0.498453	0.580875	0.466297	0.53187	0.111763	0.167528	0.168252	0.17134	0.153855	0.57824	0.527068	0.505962	0.535431	0.143171	0.84375	0.815747	0.851839	0.828597	0.816716	0.812256	0.819345	0.787516	0.824981
cg22176143	PDE6B	CCATGGAGGCCGGCCACGTGTGAGGCTGGGAGGAAGAGTTCTGCATTCTCCGGGACCCGA[CG]GTGCTTTGCACACACGGTCATCAGGGATGTTGGTGCTGTGTGTGTATACTTGTGTATCTA	0.707703	0.666895	0.696801	0.685979	0.696461	0.505188	0.409237	0.380995	0.478573	0.814796	0.694965	0.70369	0.669289	0.693118	0.820496	0.806572	0.786647	0.77823	0.796105	0.797923	0.801273	0.803049	0.785644	0.827067
cg02638338	AMPH	AATACATACACACATGGAAAAAGATCTACTCAGATACATATCAAATGGTAGTAAAATTTC[CG]AGTAGTAGAATTATGTGCTTCGTAATTTGCTGGAGTTTTTTTCTGCTTATATGTACATTT	0.565194	0.428449	0.450754	0.518249	0.519514	0.381314	0.287239	0.204479	0.274033	0.233254	0.449124	0.445877	0.525019	0.490303	0.210289	0.856138	0.82268	0.782599	0.814007	0.860872	0.77991	0.828052	0.762091	0.836348
cg25252017		CTCAGGAGTTGTCAGCAGTGTGCTTTGGGTCCTTTGTGGTCACCAGATACTGTCAAAAGA[CG]CAATTACAACAAATTTAGTTTCAAGATCCTAACTGGCTTTTCTTTGCAATTCTAGAATCA	0.466917	0.331901	0.292467	0.39588	0.242437	0.100805	0.108317	0.127107	0.130219	0.0914009	0.315304	0.275846	0.375211	0.234784	0.0905181	0.779579	0.806169	0.800094	0.804361	0.800683	0.784397	0.784934	0.784562	0.774898
cg04349727	KLK5	GGCCTCAAGTGATTCACCCACCTCTGCCTCCCAAAGTGCTGGAATTACAGGCATGAGCCA[CG]GTGCCTGGCCCAAACTGCATATTTAAAGGGTAGAGTCTGATGGCTTTAGGTACTTGTCAC	0.666188	0.577285	0.605888	0.658244	0.591778	0.383169	0.418463	0.453917	0.328946	0.44893	0.586685	0.611873	0.641611	0.601541	0.431073	0.871545	0.847929	0.84506	0.864652	0.847043	0.849154	0.832336	0.813674	0.851226
cg21266698	KIAA0040	CTGAAGAAGGCACTGATTCTCTCCATGGTGCTTGGCTAGATTAGGGCCAGAGAACCCTCT[CG]GCTTACAAGCAGGTCCTGGGCTCAAAAGGATGCAACCTTGACCACTTGTAATTTATTCCT	0.624857	0.510886	0.564669	0.564211	0.522035	0.320464	0.21147	0.269326	0.399863	0.11443	0.603765	0.564314	0.585332	0.568173	0.146359	0.792388	0.784112	0.805511	0.785988	0.782521	0.750831	0.793327	0.817501	0.773953
cg08550748		GTTTCAAGATCTGTAGTTGCAGAAGGTATATTCTGCCCAAGTCTAAGGGCAGAAGATCAA[CG]ACACAGCTTGAAGACAGGCAGAAAAAGTGAATTCTCCTTATTCAGCCTTTCGGTTGTATT	0.631655	0.558567	0.599796	0.571462	0.583925	0.28325	0.478347	0.339741	0.356098	0.127984	0.597535	0.61839	0.607415	0.593085	0.120972	0.861827	0.873381	0.833865	0.883151	0.862496	0.864195	0.851516	0.763782	0.860566
cg14332049		AAGATGGGGTCTTGCTATGTTGCCCAGGCTGCACATGAACTCTTGGGCCTGAGCAAACAT[CG]TGCCTTGGCCTCCCAAGTAGCTGGGAATACAGGCATGCACCAACCACTCCCTGTGCTGGT	0.595175	0.501993	0.604054	0.645798	0.57821	0.224832	0.380622	0.168197	0.359794	0.130708	0.557034	0.598405	0.665223	0.53372	0.29402	0.885215	0.864926	0.848082	0.854815	0.841067	0.863967	0.867486	0.834197	0.863202
cg13027556	OR5V1	AAACCAACCTATCTTTCTTTAATGAGTAAGTTGAGATGGGCCGTACATATGTAAAGATGG[CG]CTGCCATAAAAGAGAAAGACAATGGCCAGGTGGGAGGCACATGTAGAGAAGGCTTTTCGT	0.738834	0.733882	0.744828	0.721423	0.753306	0.448226	0.617449	0.603981	0.463216	0.513358	0.755743	0.753475	0.745862	0.752228	0.598973	0.84969	0.847858	0.852004	0.831458	0.82895	0.808235	0.816834	0.809459	0.816278
cg15094605	OR2H1	CAATGTGAGGTTCCACCTGCTTTCCAGCACATTCTTGGTTTCCTCACTTCTGCTAGACAA[CG]TTTGATCAGAAGGAACAGGGAACGAGAAGGAGCTGCTGGATGACGATAAGCCTGGGAAAG	0.597892	0.498195	0.521494	0.485801	0.558186	0.22137	0.301991	0.29447	0.41422	0.128896	0.527103	0.545991	0.523191	0.52816	0.271975	0.827819	0.825788	0.811224	0.826763	0.817955	0.828836	0.845463	0.759646	0.837736
cg17365076		CAGACAGTGAGGGGCAGACTAGGGAGGTGTGGGGCAGGAGCTCAAAACTCACAGCAGCTT[CG]GGGTTTAGAAGCTAAATCTATTGGGCATATCCAAAGATAAAAGGGCCAAGTAAGGGAAAG	0.609863	0.56023	0.673843	0.6449	0.587469	0.202952	0.359728	0.184524	0.433548	0.26963	0.592755	0.683895	0.643832	0.636037	0.201633	0.876032	0.877123	0.850703	0.868035	0.862725	0.840354	0.875356	0.829735	0.856025
cg22150051	CSTT	ACTTCTGCGAACTGGCAGCCCTTGGTGAGCCCATGGCCTTCTGAGGGCCAGTGTCAGAAG[CG]CCCTTCACTTGAGCAGCATCAGAGGGCCTGGGCTGACCTCACAAAGGGGCCATGAGTGTG	0.66715	0.642907	0.666461	0.671846	0.638664	0.422658	0.427431	0.402835	0.413861	0.243021	0.68326	0.680105	0.682502	0.639004	0.5086	0.802944	0.801513	0.8123	0.80078	0.827031	0.8107	0.811806	0.757871	0.805234
cg24315710	COL29A1	GGAATTTCCTAGGAATATCTTCTACTAATTCTTAAAACTGGAAAGCCATGCCCATGTCAT[CG]GTTCTGGGGTGACCCTAACATTTCATCTAGCAGTGATTGTCTTCTAAAACCCACCTGTCA	0.575795	0.42432	0.566299	0.550482	0.474725	0.138634	0.23855	0.250603	0.297778	0.217555	0.494895	0.583946	0.591	0.440394	0.266478	0.871477	0.857374	0.821815	0.837222	0.850154	0.875963	0.858763	0.82727	0.865723
cg14281092	FMNL2	CTGGTAAGGCTGTTGGCTGAATGAAGAGGGTAGAGGTTTATTGGTGCACTTACTGCGTGC[CG]ATTGTCTAGGCCACTGACACATGCAACTTAGCCTCTGTGGCTGGACATGTACATAGTTAA	0.560423	0.385222	0.43021	0.505596	0.470503	0.349261	0.122551	0.119613	0.105003	0.170897	0.270779	0.364575	0.45723	0.344391	0.162753	0.868849	0.866317	0.836705	0.832496	0.850851	0.838713	0.874806	0.787821	0.882835
cg14437725		AGAAAAGAAATTAGCAAGCAGGAAAAAAAATGGATTAAAGAGACTAGGAATTGGAAATCT[CG]CAGAGTTGGAAAATGCCTGAACATTGTTAGACTCCAAACAGTACGAGATGAGGTTTTAAA	0.533614	0.425816	0.501882	0.49706	0.362495	0.117917	0.166583	0.150045	0.149442	0.107	0.453745	0.515547	0.481821	0.351967	0.120071	0.857663	0.831697	0.854861	0.855407	0.854057	0.818905	0.848077	0.789297	0.817601
cg02261543	CTR9	GATGAGAACCAGAACAAGTCTGGCAGCGAGGCCGGCAGTCCCCGGAGGCCACGAAGACAG[CG]GTCAGATCAGGACTCAGACAGTGACCAGCCATCCAGAAAGAGAAGGCCCTCCGGTTCTGA	0.572524	0.561407	0.49226	0.383337	0.446915	0.127291	0.296028	0.0879974	0.108	0.728213	0.475921	0.443844	0.294706	0.471489	0.425574	0.898357	0.895784	0.891748	0.894827	0.884778	0.897679	0.899217	0.861755	0.896476
cg13302154	MGP	AAGGGTTCATCAGGATGGAGATATCCGGTGCACCATGAGTTCTGTTTCCTTAATCAACAC[CG]TTGTAACTTGCCCATCCAGTTTTGTGACATTAATTCAAACCTGTGCCCTAGTCCTCTTTT	0.392717	0.35084	0.455896	0.533569	0.314647	0.152809	0.175433	0.0727538	0.197031	0.762088	0.394945	0.450397	0.524898	0.30303	0.598008	0.858634	0.858382	0.852447	0.870052	0.849559	0.831268	0.874145	0.811896	0.862276
cg06224510	ITIH2	CAAAATGAAAAGACTCACGTGCTTTTTCATCTGCTTCTTTCTTTCTGAAGTATCAGGCTT[CG]AAATCCCCATAAATGGACTTTCTGAAGTAAGTACTTACAGATCACTCCTTGCTGTTGGCT	0.47094	0.406674	0.468553	0.543833	0.378576	0.111793	0.146291	0.188988	0.157326	0.139118	0.461755	0.490917	0.568297	0.414925	0.188579	0.811196	0.790052	0.849201	0.834828	0.809111	0.83738	0.819456	0.750429	0.812311
cg23415398		TGCTGTTGTAAGTTGAATTGTGTCCCAACCAAATTCTTATGTTGAAGTCTTAACCTCTGG[CG]CCCCAGAATGTGACTTTATTTGGAAATAGGGCCATTACAGATGCAATTGTTAGTTAAAAT	0.46966	0.506715	0.555686	0.568272	0.4152	0.197234	0.341511	0.24354	0.196925	0.149926	0.529254	0.566236	0.527058	0.473071	0.162309	0.80429	0.819901	0.743377	0.806608	0.836082	0.808788	0.826403	0.797601	0.851672
cg05415285		GGGATCTTCTTATCCAAGCACAATAGTCCTGTTACCCCATCCTCAGAGCGCATTTGATCG[CG]AGGTAGATGACTGGGTGGGAAGCTCGAATATTTCCCGCAGCCGTTCCTGGGGTTCACACC	0.367085	0.440022	0.432713	0.446503	0.409066	0.123904	0.141355	0.26254	0.138906	0.228119	0.458146	0.461733	0.448835	0.4488	0.374116	0.470321	0.430169	0.479522	0.52459	0.455166	0.451975	0.572642	0.597997	0.596858
cg21125190		ATAACTTACAAAAGCTCTAGAAGACACAAACTGAAACACCACAAAAGTAATATCTATGAC[CG]TTTACCAAGCTTTAAGAAGTAAGTAAAACCCTTGCCTTCATATTTTCTTCAGAACCAGGA	0.550178	0.609144	0.530085	0.604135	0.454496	0.285196	0.22872	0.19589	0.195086	0.574972	0.570818	0.549742	0.588924	0.556975	0.409228	0.879732	0.882551	0.857974	0.856506	0.871113	0.872695	0.862591	0.847023	0.880085
cg14168009	CARD11	AAAAATCACATCAAGGACCATTCATGCATTAACAGAAGACTGCTGGGGCCAGTGGAGCCA[CG]GCCTGCCTATCTGATACCCAGGCAAGTAACATCCACACGGGTCCAAGCATTCCCTGGCCT	0.595341	0.532569	0.661359	0.571361	0.570407	0.348359	0.242516	0.373943	0.38256	0.253855	0.560007	0.713796	0.595148	0.565356	0.318949	0.858423	0.860805	0.850658	0.851681	0.854011	0.847409	0.849276	0.807361	0.843115
cg17535314	GDF10	AGTTTATGAGCTTTTCTGGGCATCTTTGTGCTCCCTGAGCTTACAGCATCTGCTACCAAA[CG]AAGTGCTTAGGGAATACTTGGGGAACTGAAATCAACTTGAATTTTGGCATTTTTGACAGG	0.434314	0.343165	0.484566	0.423773	0.343161	0.104664	0.155607	0.127797	0.297974	0.105281	0.431708	0.488874	0.433305	0.425507	0.147327	0.778879	0.767218	0.806364	0.745319	0.774394	0.769677	0.772663	0.696358	0.794741
cg15889462	OR52R1	GAGAAGAGCTGTTCCCTGAAGCCAGCACCATGGACTGGTTAATATGGTCTCTGCTGGGAA[CG]CAATCTACTCTCTGCAGATGATAACAATCAAAACAAGTGTTATTATTATATACAAGGCTT	0.701546	0.731139	0.650597	0.700149	0.690007	0.437375	0.362856	0.580737	0.458541	0.230725	0.735864	0.690174	0.734309	0.707236	0.501174	0.862353	0.850093	0.824771	0.843298	0.859155	0.874709	0.838157	0.842283	0.859037
cg23935006		TAAGAGCTGTAACACTCCGTGAGGAGGTCCACGGCTTCGTTTTTGAAGTTAGTGAGACCA[CG]AACCCACTGTCAGGCAGAAACATCTGAAGGAACAAACTTCGGACATAACATCTTTAAGAG	0.828147	0.816089	0.798624	0.831753	0.816666	0.612056	0.506659	0.608746	0.662273	0.489129	0.850959	0.807624	0.863136	0.805409	0.430377	0.932805	0.922295	0.912451	0.913928	0.9106	0.909133	0.916731	0.893225	0.905113
cg26422784	SCGB1D4	AAGTGATTTATTAAAGCAACGTGTTGAAACCTTTACAATTTTTAGTGAAGATCAGGGTGT[CG]TTGAAAGACTTTGGAAACCAGGTTGAGCATTTTTACATGTCACACACCACATTTTTTCAC	0.657658	0.619049	0.604783	0.658552	0.639993	0.307828	0.494491	0.236272	0.467068	0.565362	0.636833	0.628374	0.662353	0.617641	0.488844	0.815145	0.836315	0.867223	0.833495	0.815853	0.832968	0.844003	0.772566	0.837868
cg05500783	HLA-DRA	TGACATAGATTTCTCAGGGCACAATTTCAACTACTTTTTCAGCTTTAGGGTTTTTAGATA[CG]TTTGTACCACAATTGAGCATGGGAGGGAGAGGGGTGAGCCTAAGCAGTGATGGCTGATTT	0.479631	0.47898	0.532383	0.557395	0.517715	0.223011	0.249763	0.232446	0.330347	0.286809	0.482793	0.567852	0.570113	0.512454	0.366304	0.876292	0.849955	0.80349	0.85062	0.721015	0.783677	0.822156	0.746682	0.718333
cg17313222		CTGGCAGGCTGCGCTCCCTCTGGAGGCTCTAGGGGAGAATCCATGTCTTCCAGCCTCTGA[CG]GCTGCAGCGTTTCTTGGCTGTGGTCGCAGTCTCTGCCCCCGTGGTCACATCACCTTCTCC	0.468651	0.511953	0.550414	0.565998	0.569486	0.370934	0.349758	0.275746	0.216366	0.371994	0.525477	0.57655	0.587772	0.511862	0.760894	0.816487	0.816323	0.841432	0.809027	0.799477	0.810347	0.845294	0.752882	0.856081
cg13339825	ARHGAP25	CCCTGTGGCCGGGGGCTGGGGTTTGAGTGGGGTCCGCTGGAGGGGGCCTGCGTTCCACAG[CG]AGGTTGGAGCTAACAGCTTCTGTCTTGCGGCCCCTCCTCTAGCCGGCCGCTGTGGAAGAG	0.606145	0.577049	0.621445	0.571918	0.500962	0.177204	0.261916	0.39739	0.372484	0.444751	0.579631	0.62473	0.598017	0.560529	0.359025	0.839011	0.837841	0.81189	0.826517	0.826654	0.809744	0.811085	0.794443	0.837905
cg00079598	OR6M1	GTGTATAAGATATCCAGAAAGGACAAATTACTGAGGAAGAAGTACATTGGAGTTTGCAGG[CG]ATGATCAATCCATATCAGGGAGATGATGGTGATGTTTCCTGTTGCTGTTAATGTGTAAGT	0.665153	0.565426	0.649876	0.60553	0.616423	0.429828	0.278636	0.459552	0.399419	0.316848	0.621137	0.660882	0.65174	0.620346	0.33828	0.837625	0.835029	0.86106	0.851914	0.845362	0.835387	0.845619	0.803469	0.830373
cg12220426	TACR1	TAGCACTGAGAACTGTTTCAGACCTTAGGTATGCAAGTCTATTGGGACTCCATTGTTGTC[CG]TGATTTAATGACTTTATTCAAGTGTGTATTAACTGTGTTTTCTGGTTCTGTATCTGATAC	0.701426	0.520061	0.563489	0.748761	0.55278	0.202871	0.128238	0.292156	0.386075	0.191316	0.551428	0.624724	0.761445	0.592086	0.42848	0.0969854	0.124571	0.117791	0.111403	0.144587	0.150408	0.120474	0.148254	0.11236
cg12282273		CAAATGGACTACCCATGTATATTCAATTTCTCCTATTTATTAAAATTAATAAAAATGGGA[CG]TGTTGTATGAGACCCTTTACTGTCACCATTTCTTAGGCTATATCCATAATGGAATGAAGA	0.486242	0.443948	0.506633	0.562907	0.474547	0.121665	0.338139	0.281331	0.224718	0.25888	0.51603	0.551025	0.52448	0.502503	0.251403	0.754764	0.782454	0.738009	0.740887	0.728218	0.744564	0.75727	0.700613	0.758638
cg26672375		TTCCAGCCTGAGCCACAGCTCCCTTCCCTGGAATGTTGCAGGCTTGGCCTGGGCTCCCAG[CG]GCTGACCCTGGCATGGGGGTGGGGGGGCAGTGGGAAGGGACGGAGCAGGTGGTGTGATGG	0.524359	0.404351	0.479177	0.461985	0.410276	0.162457	0.23455	0.334998	0.214143	0.432307	0.426969	0.518169	0.448941	0.412781	0.420912	0.120792	0.114824	0.114326	0.13825	0.139468	0.122381	0.223342	0.172596	0.151147
cg24376337	OR5AR1	AATAAGACACACAATTGTGCAGACTGAGTCAAACATCTAGTATCATGTGATAAATGACCC[CG]GAGCACCAAGGTCATTGAAGAAGCAGAACTTGCCATTCCCAAGAAGTTAACACCTCCTCA	0.660725	0.639416	0.664531	0.711726	0.629629	0.348874	0.564746	0.339256	0.377959	0.412529	0.687656	0.709554	0.705977	0.698842	0.50007	0.845248	0.820291	0.853456	0.8366	0.851222	0.872228	0.850089	0.811112	0.837917
cg24169915	C14orf177	TTCTTTGAATTCCAGGAACCCCCAAGATGCATTATCATGGCTGTAAACACAGGTTCTGCA[CG]TGTCTAAGTTCAGCCCCAAACCCACATGAAGAACTTATTTCCAGACAGCTCCTACTCTTA	0.351927	0.254849	0.272222	0.427927	0.290258	0.0842836	0.117526	0.091096	0.107269	0.299622	0.219422	0.304774	0.446818	0.258986	0.108935	0.771294	0.755341	0.791696	0.75622	0.737385	0.754936	0.746274	0.646841	0.707255
cg20668718	JAKMIP2	ACCTTTTCTTCTAAGTCTTTTATTTGTCTTTTCTGGATGTCTGTTTTATCTTCTAAGTCA[CG]AATTCTCTGAAGAAAGAAAAGAAAAGAAAGAAAGCATCAGTAGGTGGTAAGTTGTGCGGA	0.525051	0.50443	0.58884	0.588423	0.498676	0.277347	0.254806	0.308389	0.444494	0.219581	0.556055	0.601334	0.54888	0.553872	0.330833	0.834042	0.794311	0.801264	0.771549	0.80828	0.793561	0.825703	0.756346	0.845091
cg17735539	ADARB2	TACTTCTGAGCGATTTGCTCATCAACCGCTATTCTGCACACACACGTGGGGAGCCTGCCA[CG]TGCCCACTCTGCTTTGCCTGGTGGGGTCGGGGGAGAATAGAACAGAGGGAGTTTCACTGA	0.425078	0.300154	0.353497	0.43021	0.269002	0.0886095	0.17105	0.104036	0.163664	0.132495	0.35283	0.341369	0.453008	0.335776	0.161635	0.784862	0.814221	0.821182	0.788079	0.704056	0.696219	0.770296	0.684526	0.769198
cg10104674	FRAS1	AGTGGGAGGAATGACTATTGTGTTAAAAATGCCTGTGCTAAGTCTTCATAATAAAAGCAG[CG]TGGGCAGAAGCCAAAACTGCTCCACATTGTTGAAACCTCAATTTGTGCCACTTGGAGAAG	0.508457	0.302066	0.3761	0.42209	0.331799	0.173681	0.173657	0.146181	0.162122	0.224644	0.237203	0.380844	0.413259	0.283464	0.14334	0.777759	0.779217	0.800456	0.780948	0.792301	0.771983	0.833772	0.755875	0.811998
cg04062190	GRM3	ATTGTGCCCCTTTCCAATGCAGAGAATCTTTCCCACATTGCTGTTATTCTATGGCTAGTT[CG]TTCTCTTGCAAAGCCTGCCTTCATTGTAAATTATTCTCGTACATCCTGGAGAGTTAGACA	0.480769	0.294001	0.384397	0.445845	0.255722	0.0660853	0.113519	0.145071	0.173156	0.123157	0.330662	0.461675	0.429434	0.347291	0.160474	0.843981	0.88004	0.859583	0.836355	0.875814	0.8572	0.858225	0.809179	0.861456
cg27051089	HTR1E	TTTCAGCCGAGACTGCAGACATCTCAAGGCTCAACTGGGGAAAGGTAACGCTTCCAAGCT[CG]CTCACGTGGCTGTTGACAAGCCTCAGGTCCCAGCTGGCTGCTGGCTGGAGACGTTCTTTT	0.448036	0.429652	0.467856	0.491467	0.407969	0.151905	0.1762	0.299024	0.177107	0.186228	0.455566	0.468033	0.484171	0.410688	0.237199	0.777155	0.79039	0.79486	0.789399	0.751892	0.751602	0.766439	0.647658	0.757961
cg09633240		ACTCTGAATGTTTTTTAAGTTTATTCAGGAACCATCTAAAAGCATCCTCTGCTCCAGAGA[CG]CTGCTCTAATACAAATAACCACCTTGCAGTTTTCCATAAGGTTGCAGTGATGTGAGATGG	0.375282	0.300279	0.428571	0.399027	0.227819	0.122946	0.157212	0.103215	0.148965	0.148657	0.349152	0.36808	0.409445	0.301809	0.106816	0.783227	0.767121	0.752279	0.753239	0.781915	0.772479	0.806212	0.713714	0.803042
cg01800297		CTATCGGAGGGGCATTTGGGAGGCCTCTGCAATGGTAGAGGAGAGAAGCTGATGGCAGGA[CG]TGACTGTGTTTCTGCAGGTTACTTACTGCGCAGGAGACCAGCTCGGGGGGTCAAGTTGCT	0.504684	0.486262	0.558964	0.566809	0.556667	0.298322	0.290981	0.203931	0.351764	0.227255	0.53802	0.588656	0.595972	0.538844	0.30952	0.805396	0.811489	0.823015	0.819142	0.827769	0.808919	0.839187	0.73307	0.826786
cg06740227	RASSF9	TATCCTTACTATCTAGGTATTCATACTAGCCTAACTCCTTAGGCTAGGACTGTGTCCCCA[CG]AAGCCTTTTTTTATCAGAATCTAACAACCACAAAACACATACTTTCACAGGTAGGGTCCA	0.346285	0.219722	0.2837	0.257366	0.310755	0.092331	0.0723254	0.044935	0.0608785	0.0754517	0.218737	0.287361	0.261707	0.214361	0.0743513	0.616841	0.559215	0.559443	0.584833	0.555289	0.535955	0.542401	0.513734	0.583524
cg10024478	ABCC6	TTCCTCCCAGAGAGCAAACACAGGTCTAGACTCAATATCGTGTGGAGCTATCGATGACCA[CG]GGTCACTTCCATCTCCAGCACTGCAGGCTGTGCGGGCTGGTCCAACTGGGGTACGGTTGA	0.371229	0.304387	0.386442	0.488237	0.371451	0.189235	0.205164	0.183081	0.157791	0.109607	0.317088	0.40079	0.477786	0.348938	0.235691	0.711061	0.751212	0.75374	0.71343	0.721224	0.720183	0.725323	0.686164	0.716529
cg14544225		AAGTTATAGGATTAGTTCAAAATTGCATAGCTAGGTAGAAGCCCTAGAGAAATTCAGAAC[CG]AGACAGACAATGCATGATGTATTTATTAGGATGCCATTGGCTACATGAAAGAGAAACTTT	0.572542	0.495385	0.597129	0.599502	0.481722	0.221782	0.371382	0.162075	0.269546	0.155095	0.56093	0.600296	0.606881	0.521307	0.271622	0.809375	0.885604	0.832372	0.853328	0.846276	0.845994	0.875478	0.807781	0.885475
cg00749118	MAD1L1	CTGACATGGCTCTAAGTGACTATTCAGGGTACAGCCCCACACCCTGCCCGTCAGAGTTTA[CG]GCTGCTTGGGGAGGAACTGCTCTGCAGAGCCATCAGGAGGATAACAGCGATTATCATGAA	0.490282	0.607892	0.569008	0.447006	0.429596	0.267457	0.306907	0.230336	0.188889	0.556293	0.614134	0.573657	0.434557	0.492348	0.596441	0.891051	0.870165	0.879864	0.887757	0.881792	0.862126	0.87934	0.865332	0.89281
cg02245566	OR6K2	TAATGGGGATAGAGAGGAAGACAAGGAAGAAGGACATGGTCCATATTCTATAGTTGCTTA[CG]ACTTAAGTTGTAGTGTGGAAAAAATCCAGTCAGAAAGCACAGTCAATATTTTGGATGTGA	0.64347	0.651729	0.655416	0.64741	0.556655	0.375294	0.399423	0.529004	0.416856	0.242214	0.655783	0.651033	0.687332	0.611192	0.452388	0.856536	0.864978	0.88	0.869925	0.851555	0.851194	0.853807	0.832174	0.896704
cg10081086	MEGF11	GAGGCCTGGGTGGTGGGAAATTCTGTTTCTCTGAAGCACTGGGGATGTAAGGAGGGCTCT[CG]GTGTGCCCCCACCAGCTGGCACACCTGAGATATGCCTCAGAGGCACACATCTAGGAAAAA	0.609034	0.581836	0.661055	0.647733	0.56327	0.373531	0.312287	0.406385	0.471137	0.251806	0.598831	0.663045	0.64293	0.607901	0.486009	0.829516	0.853968	0.845632	0.842947	0.843863	0.820501	0.805485	0.823366	0.822952
cg27009439		TGCAGGACGCAGACCTGAGCCCAGAGCGCCGCCCAAGAGCGCCTTCTCATTCCCCACCCT[CG]TCTCCCCCAGCCTGAGCACATCATGTCTATCATGGTCCAGTCTGAAGCAGTGACCCGGAG	0.595036	0.64024	0.668172	0.648407	0.603887	0.377571	0.348581	0.360047	0.464317	0.378584	0.699042	0.65448	0.652553	0.655807	0.480422	0.817863	0.837763	0.829458	0.81841	0.824825	0.813554	0.83425	0.778701	0.826261
cg14649589		TCAAACATGAGGAAGGGATGGAGGGGAACATCATAGAAGTTAAAGAGTTTGTATCAGCTA[CG]ACAGCATCCCCATACTGGACCTAGTGTTGAAATGCCACAGCAAACTCAAGGGGTGTTCAA	0.678552	0.586664	0.579833	0.64097	0.625151	0.348147	0.45008	0.195314	0.119749	0.399086	0.588185	0.598879	0.650675	0.597789	0.294039	0.868124	0.848666	0.876388	0.858468	0.845001	0.845809	0.828063	0.821354	0.875443
cg23622129		CAAATTAAAGGACCACATTTTGCACTTCTACTTGAAGTCACACATTGCAGCCATGTTCTA[CG]TCACTCTGGGGCCCAACACCTTCAGTATTAACTTCTGTGCCACCCAAAAGCCTTGGAAGG	0.518964	0.397498	0.477212	0.42316	0.353077	0.285891	0.187793	0.0927393	0.100534	0.257374	0.456299	0.470374	0.436492	0.359458	0.570528	0.780899	0.758749	0.800038	0.777435	0.76492	0.767837	0.778686	0.725989	0.793065
cg02769522		CACACGTGTAGAAAAGTAGTTTTCTGTTTCTAAGCTTCAATTTCAATTCTCTGTCAATAT[CG]AGCCCCCTCCTCATGCTTTCTCTTCTCCCCTTTCCCTCTTTCCATCCATCCTCCTCTCTC	0.57064	0.540543	0.594413	0.567334	0.555132	0.257695	0.2967	0.366365	0.162192	0.116205	0.591762	0.598273	0.619695	0.561207	0.135725	0.853148	0.839237	0.857028	0.847303	0.832852	0.831753	0.864737	0.736932	0.84079
cg10279872	COLEC10	ACCCAATAACTCGCCAGGTTACATGGGTCTTGAGAGAGAATTTTAATTACTAATTGTGCA[CG]AGATAGTTGGTTGTCTATATGTCAAATGAGTTGTTCTCTTGGTATTTGCTCTACCATCTC	0.732437	0.686801	0.73513	0.742318	0.707356	0.502075	0.542808	0.422896	0.485909	0.638052	0.702042	0.764489	0.764264	0.738602	0.817408	0.89649	0.860075	0.8912	0.849924	0.867462	0.826114	0.863632	0.832398	0.868097
cg09664215	CD1E	TCCTGGGAGCCATCTCCAGGAGCAGGGATCCGGGCCCAGAACATCTGTAAAGTGCTCAAT[CG]CTACCTAGATATTAAGGAAATACTGCAAAGCCTTCTTGGTCACACCTGCCCTCGATTTCT	0.620393	0.610005	0.648311	0.642097	0.548151	0.329433	0.45381	0.372637	0.302552	0.286087	0.612768	0.648938	0.666884	0.599358	0.277289	0.868778	0.856159	0.873018	0.844796	0.856803	0.860673	0.855362	0.7967	0.847069
cg22567315		CCATCATACTAAAATGATCAGTCTGCATTCCACTGAGTCAACAAAGCCATCATACTAACA[CG]GTTATTCTGCATTCCACTGAGTCCAGATCTTACTTCTGCCACATAGCTTCTTAGGCCAAT	0.58972	0.504109	0.514058	0.605723	0.58668	0.388806	0.108853	0.119975	0.142727	0.134228	0.424298	0.524419	0.589724	0.521178	0.199384	0.835734	0.837737	0.863538	0.837348	0.827641	0.808307	0.818279	0.783596	0.862783
cg08453903		TCTATTTGTCCTTCCTTACAATAGCTGAAACACGGGTCCACGTGCTGGGGCTGCCAAATT[CG]TGATGCAAAAAGATGAGATGGTGAATTATTGGGATAAGTCTTCTTTCTCTTTCCCCCGGG	0.558195	0.491693	0.562867	0.544693	0.452966	0.202227	0.193645	0.228331	0.275592	0.0946156	0.557383	0.549508	0.552232	0.467351	0.114924	0.834947	0.806638	0.795426	0.805934	0.817329	0.79517	0.78763	0.737084	0.796948
cg24985151		TCCTGCATTAGTCTTCTTTGATCTGGAACCGTTCCTTGGCTTTTATATTTATTGAAATGA[CG]TTATTTAAGAGTACAGACCAGGTATTGTGTGGAATATCCTTTAAAGTGAGTTTGTCTGAT	0.404465	0.363835	0.375051	0.429408	0.521105	0.0888435	0.139537	0.169338	0.0990917	0.191131	0.359936	0.411315	0.42941	0.437327	0.282121	0.812602	0.794517	0.832547	0.832667	0.76969	0.787979	0.756835	0.706217	0.803165
cg05362191		TGTCCTCCAAAATCCATTCTCCCTTCTTCTGTAGTGGGAAGGATTTATGTGGTCTGTGGC[CG]CGCAGGATAAGAACTAACTTCCCAGCTTGCCTTTGCAGCCAAGAGACCAAGTTGTGTTCA	0.529164	0.291151	0.412067	0.345612	0.362278	0.143587	0.182103	0.173653	0.151379	0.12262	0.248805	0.434051	0.341523	0.319329	0.13439	0.818794	0.816025	0.832659	0.835657	0.849483	0.840153	0.820882	0.793669	0.830017
cg24722886	PLEKHA7	AGTCAGTGGAAAGAGTGTGGCTTTGGAGCCTGAACTAGGTTCCAATCATAGCTCCACACT[CG]TAGTGTAAGCTTTGTAAAATATCTCCTAAATAGTGCCCAAAATGAAGAAGGTGAATGGTA	0.583396	0.573528	0.491793	0.497746	0.614443	0.27798	0.373043	0.285808	0.446096	0.324991	0.592256	0.534062	0.540884	0.578725	0.256362	0.835297	0.832588	0.842251	0.831821	0.847472	0.822187	0.818466	0.799366	0.826423
cg17419096	CALCR	TCTTCCTGCCAAATGCAGGTCTTTTTCTTCACATATTTACTAATCTCTCTATTAGAAAGC[CG]CTTTGTCTTGCAGAGGTCACGTAGTTCATGTGGTTTACATTGTAAGGATGGTAAAACATC	0.79276	0.756942	0.764668	0.772592	0.799524	0.452732	0.621593	0.662735	0.460401	0.759332	0.775405	0.799727	0.81682	0.754506	0.749027	0.887652	0.875522	0.836367	0.87938	0.885366	0.891675	0.887606	0.867085	0.889953
cg18345456	PROX1	TGTTTGAACACTGCTTTACGTTCAGCTGCAGTACCCTGCTTCTCTGATCTTTTATATTCC[CG]AGCAGATGTCTTTCATTAATTTATGGATTTATCATCTTTTCTTTTTTTTTTCTTTTTTCT	0.435009	0.41972	0.529923	0.554796	0.510251	0.134012	0.32482	0.112367	0.148808	0.222394	0.443053	0.533432	0.570902	0.44619	0.422423	0.792878	0.777538	0.777836	0.795542	0.780591	0.763842	0.794899	0.754261	0.800734
cg15977002	TPO	CTTCTTCCCCTTCATCTCGAGAGGGAAAGAACTCCTTTGGGGTAAGTAGCAAACACATTG[CG]GTCTTCTGGCCTTATAAAGTTATTTTTCACACTTACTAAAATAGAGGGCATAATGGTAGC	0.535265	0.494235	0.582638	0.601145	0.43067	0.166569	0.333701	0.264788	0.230265	0.143229	0.600616	0.637292	0.652001	0.487002	0.176618	0.87043	0.885485	0.840048	0.853758	0.874008	0.875292	0.875054	0.837855	0.865745
cg12658930		AGGACATTGATGTTATGTGTTCCTATTATACTGTTTATAATAGGAAATACAGTATTTTTC[CG]ATTTTAAAGTCTCAAAGCAACAATGAGAGGAATCTAAGAAGATGAGCAAGAGAGGAGTTG	0.575275	0.597743	0.680135	0.644334	0.640712	0.390332	0.180523	0.343192	0.481895	0.374892	0.674471	0.720037	0.684336	0.653814	0.186778	0.858042	0.80549	0.812654	0.842482	0.836141	0.821354	0.835144	0.814958	0.842841
cg16932472	IPO5	ACGTCTCTGAGCCAGGAGGTCAGAACTGTGGGATTGATGACCTCCCACAACTGGAGCAGC[CG]GGAACAGCTCTGACCACAGTAAGTCATCCCAAAACCTCACATTCAGATGAAACCATTTAA	0.480833	0.264557	0.319181	0.377132	0.315879	0.107271	0.0919653	0.125374	0.18306	0.218362	0.189926	0.29918	0.37187	0.2276	0.12976	0.800217	0.795372	0.793788	0.817172	0.78425	0.785075	0.794499	0.714403	0.800593
cg13023870		TGAAAGGAGTTGATCCTGACTCCAAGATGCATTCCAAAGAAAGAAAACGCAACTGTAGCC[CG]GACTCCGCGGAGGAAGGCCAACTGACTCCACTACGTGCACTTCCGAGCCACTTGGGCCCA	0.528763	0.557504	0.625976	0.39674	0.614933	0.114196	0.187383	0.281342	0.100404	0.438574	0.434258	0.656836	0.403412	0.541041	0.463161	0.119948	0.0888915	0.11505	0.0803221	0.0966483	0.0921565	0.119042	0.121889	0.0846619
cg21129006		GCCAGCAGTGACAAAGGAAGAGAGTCTGTGGTCTCATAGAGCTTATCATGGGTTTCTAGG[CG]AATTTCTCTCAACAGAAAAGGTGAGGTCTGAGATGGTCTCTAGGAATTTGATGTTCAGGT	0.471206	0.412853	0.477743	0.482001	0.300636	0.164607	0.185265	0.287362	0.177822	0.122193	0.420799	0.49292	0.480848	0.372089	0.218982	0.77077	0.817086	0.747869	0.794768	0.782029	0.769511	0.801768	0.775882	0.80098
cg14069333		TTTTTGATATCCAAGCTGCCTCCATGAATAATTCTACTGGCTTTTCAGTTAGAATCTTCT[CG]ACTAGACACTCCCAACTCTGGAGCTGACTTTGTACCAGTATCTGGGCAACCCTGGCATGC	0.534462	0.494243	0.586705	0.572163	0.425096	0.161486	0.238904	0.143434	0.182802	0.119171	0.551518	0.576145	0.584095	0.543511	0.202901	0.864522	0.864023	0.892427	0.879963	0.874536	0.86428	0.867317	0.810947	0.852543
cg01300641		GTCTCTTTAATGATGGAAATGTGATGTTTTAGGGTTTTTTATTTTTATTTCATTTTAGGT[CG]ATACAAGTGACATAGAAATTTGAGTTAGGCAGTTCCCTCACCAGGCACCTGCCTCTTCTG	0.538252	0.499729	0.586173	0.620932	0.542509	0.276607	0.398651	0.339052	0.132112	0.286361	0.560655	0.636511	0.638599	0.541095	0.380818	0.860258	0.829272	0.811357	0.832331	0.817507	0.819012	0.790982	0.771272	0.821338
cg19036773	MLL3	ACAGGCTTGTAATCTTTTAAGCAAAGAAATGTCAAGAGAGGACAGAAATCAGTGCTGCTG[CG]ATCTACTGCCCTCTAGTGACTTCATCCTAGGAAGAGGGCAGGAGAGTGGCCATAAATACC	0.369439	0.234398	0.338201	0.298577	0.325189	0.114091	0.107377	0.0686305	0.143075	0.327624	0.170929	0.341745	0.310391	0.267515	0.361324	0.483849	0.61667	0.637145	0.626231	0.628478	0.637146	0.552703	0.57212	0.625481
cg25583651	GABBR1	TTCTGTTCACAGGAAGACTGCAAGGTGCCGAGTCACACTGTTCACTGGTTTATTGAGATT[CG]GGGAGATCCTTCCCCAAGAGACACCACAGTGTGAAAGGGACACCACCTCCCACCCCATAG	0.669488	0.659304	0.665916	0.701641	0.622636	0.484706	0.459561	0.444883	0.451253	0.43967	0.630598	0.691541	0.723802	0.650313	0.440883	0.83858	0.839762	0.873665	0.825843	0.812791	0.822849	0.819124	0.802166	0.851164
cg25972997	GPC5	TACCTAAAGATAGTGTCAGATTCCAAAAGGTGAGGGCTCAGTCCCCAAGACTGCCTCCCT[CG]ACTTCAGATGCCAGTTAAAAGCTCCAAGCTGTCTGACTTGTGCCTATAACTGACTGGCTC	0.538952	0.440862	0.498358	0.594545	0.541072	0.110904	0.306514	0.142057	0.253554	0.450914	0.517398	0.556446	0.577086	0.515559	0.141857	0.817252	0.797486	0.832203	0.79627	0.818257	0.81547	0.825228	0.77471	0.834476
cg05808709	ATP1A2	AGTCTGATGACTATGCACTCCTTCCTCCTCAGGTGGATAACTCATCCTTAACAGGAGAGT[CG]GAGCCCCAGACCCGCTCCCCCGAGTTCACCCATGAGAACCCCCTGGAGACCCGCAATATC	0.59251	0.43032	0.522933	0.542328	0.448912	0.298935	0.210462	0.248756	0.271894	0.170668	0.39019	0.564101	0.535053	0.421938	0.167995	0.824187	0.817395	0.830021	0.81679	0.812624	0.811245	0.841717	0.810688	0.826711
cg13294738		CTGAGATGCGTCAGGGCCCACCGCCGGCGCTGAGGATGGAACAGTGAACACAGCAAGCCA[CG]TCCTTCCTCCTAGGGCCCATATTCTGATGGAAGGAGTCAGACGAAAGGCAGAGAAATGCA	0.707545	0.611834	0.672503	0.627601	0.611026	0.436253	0.473362	0.423706	0.284838	0.4308	0.652756	0.681814	0.650481	0.631199	0.354975	0.864458	0.860208	0.863136	0.848593	0.851508	0.849039	0.872221	0.836489	0.859707
cg23589587		GCCTTTGTCTGTCTCCTGCCTATATAATTTTTACATTAGGACAATGAGGCAAATTGAAGT[CG]TAGATGGTAACAGTGACAGTACTGTCTACTTCTTGTAGACAGTAACAGTGAATACTGTGA	0.640248	0.667693	0.648944	0.696778	0.637188	0.443935	0.473751	0.394107	0.384851	0.350768	0.68792	0.675267	0.688338	0.632797	0.32594	0.782982	0.80809	0.805743	0.774138	0.811141	0.748522	0.773757	0.807545	0.794977
cg22378095		ATCCTAACCTGCTTTGGTTTTATCAGAGCCTAAATAACATGGAGGAAAGGAAGTACTCAA[CG]CTAGCCAGTTTTAATCTTCCACTTGGAGGAAGGGAAATACTCAATTCCAGCCCCCTCTAG	0.509432	0.290426	0.419237	0.391881	0.473636	0.165768	0.183637	0.224279	0.165354	0.131182	0.318132	0.421723	0.394041	0.334626	0.120791	0.863601	0.853297	0.844173	0.81731	0.845738	0.843326	0.842201	0.785373	0.864848
cg18347762		CTGGCCTGATAGTCCAAGACCTCTCAATAGGACTGTTTGGCTATGAATGACAGTGCTGCC[CG]CTTTCAGCCTTTCAAATCAAATTATGATGACTGATGGGACCCCATTAAGTCTTGTGGGTC	0.568674	0.510122	0.61631	0.633545	0.553631	0.277485	0.32838	0.208569	0.380259	0.181849	0.569124	0.599881	0.627769	0.577466	0.359976	0.835776	0.820844	0.843315	0.846008	0.848224	0.822582	0.823859	0.797724	0.82015
cg14666108	TP73	GCCCCGTGACTGCCTCCCCCTCCCTGTACCCTGCACTGCACGTGTCATAATTCAAGTTCT[CG]GCTCAGCCACCCATTCTCGGCTCAGCCACTAATGTGTGCTGGAAGGTGTCCAGGAAGCCC	0.413072	0.430994	0.47827	0.593157	0.406998	0.186909	0.170187	0.269295	0.228759	0.100123	0.400647	0.512219	0.584282	0.405908	0.0996951	0.841204	0.841962	0.823638	0.813569	0.852688	0.828319	0.834131	0.806562	0.852765
cg06009215		GGCCATTGTAATGCTAATTCACAAGAGGGGTGCTGCCCCAGCTCTCTTCTTGCTTCTTGG[CG]TGAGTTTTTGGAACAATCTCTTTTCTTCCTGCTGCTGGCTTTTTGAACAGGCTGTCCAGG	0.61218	0.462403	0.651281	0.617521	0.619947	0.327123	0.222624	0.153719	0.246396	0.0691682	0.541279	0.645548	0.593564	0.613484	0.0672297	0.108847	0.142555	0.131296	0.152967	0.143461	0.138194	0.131894	0.25685	0.128531
cg14309246	AKT2	GGGATATAACATTTTATAATGCAACTTGGGCCCATAAAGGCCTTAAAATCACCCTGCGGC[CG]GGCGCGGTGGCTCACTCCTGTAATCCTAGCACTTGGGGAGGCCAAGGCAGACGGATCATG	0.39665	0.48368	0.469039	0.447546	0.549284	0.281858	0.264017	0.306098	0.222112	0.55036	0.45029	0.468715	0.439104	0.469373	0.560893	0.753277	0.728271	0.77076	0.734432	0.759589	0.731308	0.720382	0.733372	0.764285
cg08089153	TNNT3	ACTCTGGACCTGCCCACCCCAGGGACCTGGACCCTGAGAGGCCCAAACAGGCTGTTGCCA[CG]GACCCCTGGCTGAGGCTGCTTTCCTGCTGGGGACTGTGGCCAGAGCCCGTCCTCCTGGCT	0.496795	0.41715	0.465302	0.536471	0.50777	0.128546	0.360822	0.169001	0.128691	0.309951	0.43643	0.498863	0.530294	0.466183	0.241873	0.759247	0.764145	0.728618	0.741083	0.75574	0.73419	0.737046	0.685983	0.743201
cg03818576	LRRC4C	TTCTCTAGGCCTCAGTTTCCTTTTTTTATTGACTTGAGATCTCTGGAGAGTCTTCTGGCT[CG]AAAGTTATATGAGTCTATGATTCTGATAGAAGGCCCCAGAGAGGAATAGCGAAGGGGGAA	0.350137	0.354828	0.428886	0.457211	0.248543	0.118683	0.128224	0.134296	0.0907883	0.115073	0.39556	0.453726	0.464647	0.324621	0.0550309	0.771931	0.779825	0.807814	0.777733	0.774887	0.776689	0.797126	0.719952	0.796258
cg18403193	C6orf176	GTTGTCAAGGAATCCAAGAAATATTTTTGAGAAGGAAGAAGAAGAAAGAACAGATGGTCA[CG]AGGGTCAAATGCTACACCCATGTGTTAGCCAGATCTGGCACCAGAAGACAGCTGTGTCCC	0.614998	0.569431	0.591029	0.597178	0.562498	0.19033	0.322856	0.385591	0.333307	0.305358	0.601842	0.629186	0.612606	0.597646	0.153907	0.779219	0.781536	0.781617	0.780102	0.804055	0.760808	0.763788	0.713515	0.793917
cg02641770	DLGAP2	ATTAAACTTTCTGGTGGAAAACTACAGGTTTCTGGGTCCTCACAACCCCAGATTTTATTT[CG]CAGCCAGGAAACAGGGAAACTAAAGGAATTTGTCTGTGGGTCCTAGTGTACGGATAAGAT	0.73872	0.70497	0.735249	0.713199	0.725808	0.582375	0.551094	0.559453	0.394962	0.545674	0.705174	0.741783	0.739864	0.751443	0.554215	0.85476	0.867357	0.8557	0.860787	0.871285	0.847791	0.848283	0.812119	0.865178
cg03550727		TCCCTCCACTGAGTCTATTCCATGGACTGGATGCTGGGAGCCACTCCTGAATTAGCACCT[CG]TTCACTGAGCTTCCCCCAGGACCAACAGCCAGCCCAACCCCAGTTTATCCACAGGCCTCA	0.538714	0.515174	0.564575	0.566335	0.456993	0.287398	0.35814	0.332442	0.181142	0.117751	0.535691	0.564926	0.581316	0.510237	0.151053	0.817828	0.807461	0.828621	0.819238	0.810659	0.802944	0.802721	0.733618	0.815364
cg23960736		CCAATGACTCCCTCCTGTAAACTGGGGACTCCTCTGGTGCATGGGCAGGTTTGTGTTCTT[CG]GGGATGTGGCAGATGGAATGGGCAGACTGAGGACCTCACAGCAGAAATATCAGGACATAT	0.593588	0.53983	0.690915	0.612516	0.575426	0.223136	0.307887	0.390462	0.302424	0.108184	0.559785	0.680227	0.640142	0.621509	0.202923	0.869695	0.881163	0.859916	0.871589	0.893606	0.88905	0.882065	0.850418	0.905967
cg05405389	DLG2	TAGGGAATAATGTCAGAGGCTCTGGGAAGGCTCTCCATGCAAAAACCTTTCTCAGGGATT[CG]AAGATATTTTTAACAAATAAGATGAAGTATAAAATTTCACAAGTGGAATTCAGCCTTAAA	0.55414	0.487981	0.554572	0.54674	0.434072	0.256481	0.178103	0.208532	0.228987	0.134023	0.562533	0.557149	0.536007	0.540046	0.15933	0.826689	0.799867	0.813701	0.790812	0.802197	0.778625	0.797199	0.747454	0.802602
cg15423764	GLYAT	TGTACTAGGCTGGCAAAAGAATCTGGTGTCAGTTCTAGTGGAATTCAGCCCTGCCTCTCA[CG]GGCCCATGTTGAAGTAATTGGCTCTGCATGGTTGAGAGGCTGGCTGTATGCCCCTGAGCT	0.443861	0.368685	0.407312	0.375181	0.407335	0.137373	0.204528	0.161927	0.231568	0.129994	0.387312	0.442047	0.389272	0.415796	0.111204	0.689497	0.683813	0.740863	0.679628	0.658954	0.667237	0.620796	0.73261	0.617491
cg21616142		CTGGAATCCTCTTCCTGCAGATCTAGGTACAGCCAGCTTCTTTTCAATCTTCAAATCTCA[CG]GCAGATATTATATTCCCTTTGCAAGGAAAGCTTCCCTGATGACTTGATTTAAAAACTCCT	0.705121	0.665043	0.69846	0.757901	0.745615	0.55958	0.590981	0.377228	0.434664	0.472391	0.695022	0.731936	0.795898	0.705871	0.442729	0.552187	0.549927	0.569807	0.579832	0.601	0.554987	0.535109	0.474473	0.520724
cg17620505	FOXP4	CGATGTTCAGAAGGAAAACTTACCTGCCCATTAGTCTTTCTCCTCTCTCCATTTCAAGCC[CG]GCAAAAGCAAGGATTACGTTTTGCTCACCTCCATTTGCCCCAACCCCAGTGCCCACTGTG	0.710364	0.780857	0.732486	0.752468	0.78079	0.511738	0.599296	0.548113	0.539148	0.497845	0.74145	0.740471	0.732305	0.729233	0.530173	0.475992	0.510365	0.588849	0.569023	0.548069	0.516571	0.419615	0.552281	0.419338
cg06361127	ZNF648	GAAAAGAGGCAGCCAGAGAGAAGGCATATATGAATTTATATGAATTCTGTGGGTGAGACT[CG]GGTTAGATCTACTTACTAAATTCCACTATAAAGAGGAATGGGCTTCTTTTTCAGATGCTA	0.543435	0.580278	0.591808	0.568175	0.619296	0.244811	0.371157	0.370959	0.433926	0.302712	0.669036	0.631351	0.613791	0.62411	0.292768	0.823331	0.814763	0.785446	0.811045	0.811547	0.806208	0.772788	0.724651	0.80374
cg22032137		AGGTATTAGTTATTTCTAGAAACAGGAGAAAAAAGTGTAGAAGTTTGCAGTTGCATGCCA[CG]AGGCTCAGGATATTTAATGTTCCAGCAGCTTTAGGTTTAATTTACTTTAAGTTTGCATTA	0.565924	0.545333	0.572003	0.654091	0.511398	0.316939	0.439701	0.2237	0.333265	0.290509	0.591236	0.635439	0.704785	0.590581	0.321883	0.849385	0.811546	0.848307	0.840435	0.850431	0.882856	0.897008	0.80696	0.858641
cg07171765		TAAACTCCTTGTTGAAAAGAACTATATTTTATATATTTTTTAGAATTTCCCTGGGCACCT[CG]CACAGAAGTGGACATATAGTAAGCTCTCAATGAATACTTATTATTTGATTGAATTGCCAG	0.705988	0.729272	0.760708	0.719658	0.738267	0.417921	0.470068	0.397266	0.56416	0.418272	0.776687	0.761216	0.754824	0.73876	0.454298	0.882822	0.890386	0.802808	0.875125	0.879844	0.867501	0.852604	0.845438	0.893993
cg07089660	DEFA4	CAGCTCAACATGGATTGAAGACTCAACATAGACTTGAAAAGACCTGAAACCATACAACTA[CG]AGAAGCACATACAAAGATAAAGCTTTGGACATTGACGTGAGTAATGATTTCTTGGCTATG	0.608859	0.527606	0.630121	0.606571	0.530711	0.207571	0.25997	0.3395	0.389699	0.301884	0.586204	0.655818	0.650981	0.556213	0.247858	0.841647	0.839385	0.855991	0.84969	0.863684	0.858358	0.853872	0.793872	0.823682
cg23171103		TGGACAGTGCCTACTTCTCCCAGAAATGATGTGCCACAATACACATGGGGAATTGCCAGC[CG]GGGAAGCTCAGCCAAGTCTTGATGTTCGGAGTTTGGAACTTAGTCATAAAGACATTTTTG	0.585332	0.526211	0.448541	0.542139	0.581191	0.282851	0.246235	0.15718	0.329703	0.362916	0.468673	0.432723	0.48993	0.56467	0.325054	0.867131	0.849352	0.843521	0.82152	0.853615	0.858944	0.835889	0.778211	0.856316
cg02560364		TAGGGCATGGTATTTTGTTGTAGGCCTGTCACTGGGGTGGTTATAAAGAGGGAGGAATTA[CG]GATGCATTTCAGGTTTCCAGTCTGTGAATGTAGCAGATATTGGGACAAGAGAGGTAGTCA	0.5607	0.581871	0.555403	0.516047	0.50007	0.176317	0.397828	0.134697	0.234289	0.416701	0.618988	0.584824	0.539204	0.560894	0.40133	0.761078	0.790144	0.770953	0.748426	0.776729	0.760921	0.766163	0.709325	0.798156
cg02381853		GGGGAAGAAACCAGTAAATCCACACACAAGTTTGCTCGACATGGTAAGATTTGAGCCTCT[CG]TTGCTTTGTTTTTCACATGCCCAGTGCAAAGATTTCAGGCAGTAATAGTTATGATCTATG	0.536543	0.448381	0.508593	0.633906	0.476204	0.148295	0.138512	0.20289	0.186277	0.13844	0.429323	0.502546	0.599064	0.439793	0.103463	0.865679	0.873345	0.892713	0.880342	0.892608	0.874869	0.881869	0.832274	0.859259
cg15651758	CSN3	GGGTCTTCTCTACAGCTGACAGGCCAACTCAACCTACTGCCAACCAAGACCTGACTGGCA[CG]AGGAAAGGTAATGCTGCTGAAACACTTGGAGAAAGTGATCCTTTTCACAGTAGTTAGTTG	0.480785	0.284053	0.481044	0.509568	0.442272	0.0876208	0.226867	0.130797	0.230944	0.111603	0.37356	0.467286	0.508199	0.374014	0.140705	0.877772	0.866047	0.888239	0.873755	0.887855	0.871616	0.87006	0.830156	0.868112
cg09906066		GAGAAAGGGCCCTTGGGTCTGGTAATTATGAAGCCATGGTGACTTGTAGGATTGGAAAAG[CG]GAAGTCAGACTGCAAAACAGTAAGTCAGTTAGTAGCCATAAGATTGATTGACCACTGCCT	0.466932	0.544364	0.612217	0.595006	0.63163	0.314008	0.456108	0.263132	0.285017	0.408567	0.559847	0.589785	0.608266	0.655676	0.490229	0.88524	0.872702	0.908883	0.880039	0.888201	0.872178	0.87636	0.861869	0.883872
cg18929251	LAMB4	CTGTCAAACTCATTCCTGGGCCTCATTTCTCCTATTATCCTACAGATGGGTTTAAGGTCA[CG]TTCATGGAATGTATGACTATTCAGGATGACAGTGCAGATCTCTGGACCAAGCCTAGTGTT	0.617142	0.569645	0.605151	0.672296	0.580092	0.382818	0.399309	0.324326	0.431859	0.399923	0.632348	0.703701	0.676629	0.577122	0.424337	0.857088	0.812807	0.805792	0.817851	0.811986	0.83944	0.826163	0.790089	0.858345
cg12082048		CCTGACTGCCCTGGTTTTATTCTTAGGAGAATCACCTTTGTCTGTGGTTCTCCAGGACCA[CG]TGGGAGGTCACTTTGGGAGCCACTTTGAAAGAAGTAAAAAGAAACAGGTGGAGTCAATTG	0.446837	0.487199	0.507837	0.521503	0.401749	0.216346	0.223082	0.191262	0.29874	0.119879	0.475047	0.491582	0.516659	0.474755	0.143064	0.753987	0.755074	0.614437	0.77229	0.723929	0.73278	0.755234	0.68702	0.724603
cg27024196		TTCCTTATGAACTCTTTGAACTCATCTTGTTTTCTGGAACTTTCTCTAGAGGGGGTCTCA[CG]GGTAGTAGACACCGGAGGATGCTGCTGCCCTTGTGGGGTTCAGGTATGAAGTGATCAGGT	0.605384	0.557561	0.632404	0.691441	0.576768	0.205955	0.368312	0.168945	0.445119	0.168683	0.580031	0.690692	0.716178	0.531979	0.140071	0.878555	0.86102	0.847922	0.85752	0.840382	0.843818	0.865951	0.839043	0.872225
cg27305342	MYL1	TTAAAGGTATCTAGGGGATTGGCCAGCAATGGGTTTTCATGGTAGCTTACCTGAAAATAG[CG]GGCAACTCCCTTCTGGAAATGGTACTGGGAAAAGTGGTACAGGAAAAGATCCTCCTAGGA	0.680373	0.705939	0.725995	0.676241	0.760516	0.300815	0.3958	0.20522	0.453378	0.643263	0.75378	0.711881	0.69182	0.73088	0.580384	0.885907	0.898616	0.866268	0.886875	0.869886	0.872423	0.875863	0.866434	0.876006
cg11543937	SPINK5	TTATTATATAGGATTATAGAATATTCAACTTTGAGTAGGGTCTGTGGACTCCATCAATTG[CG]TTCTGGGGGAGGTACCATGAAAGAACATTCCTACTTTAGAAATAGATATTCTCTGTTCAA	0.644195	0.598731	0.564135	0.656754	0.558411	0.278474	0.396424	0.16876	0.308861	0.338893	0.651855	0.664216	0.667494	0.617004	0.443842	0.828883	0.828405	0.825417	0.792269	0.80383	0.819959	0.808783	0.806613	0.832169
cg11863863		AGAGTGAGGTTAGGGGACTTGCCCAGGGTTACACAGTTAGCAAGCTGCAGAAGTGGGATT[CG]AACCTGGGTCCTCCCATCAACCCATGCTCTATCCCTACTGAGTTAACAAGCCACATCTCT	0.555696	0.549856	0.554047	0.587495	0.581017	0.318905	0.34773	0.310676	0.126771	0.1653	0.618622	0.58865	0.653583	0.644215	0.372086	0.782516	0.754679	0.799964	0.751531	0.761541	0.750422	0.780162	0.692064	0.782064
cg14925764		CCACAGGCAGCCCCCACCGGGGGAGCCGGACGTTTCCATCCACCCAGACAGCAGCGTTCA[CG]CCCAGGACCATGTGGGCCTGCGCCCCGGGCCGCACCTGCCTCTCCTGCATTCCGTGTCTG	0.487093	0.584271	0.540258	0.495644	0.448752	NA	0.282461	0.254763	0.190283	0.0780262	0.595953	0.579091	0.525848	0.461664	0.224153	0.698841	0.704787	0.836287	0.826178	0.802556	0.781378	0.831945	0.749239	0.772412
cg21069434	MYT1L	TAATATTGACAAACCCAAAACAACATGAATTCGGAACTGTTTTGTTTAGAATTCTAAAAA[CG]ATTCTGCTATTTGGTGGGGTGCTATGCACCTGGATGTGGAATTAAGAGGTGCATCTCCTT	0.618826	0.531145	0.629962	0.618363	0.57018	0.258978	0.382468	0.227643	0.408264	0.349701	0.567592	0.615202	0.654539	0.610606	0.432661	0.781431	0.793337	0.804181	0.805037	0.777412	0.777958	0.788867	0.777759	0.799234
cg01845013		CAATAGGCCTCCATATTCTAAGTGATTTCATATCACTGTTACATTCCATAGGCTGAATTA[CG]CTCCTTCATTTAGCCTCTTTCTTACAAGACCAATTTCTGGCATTAAAATCATGTTTCTAG	0.778578	0.741179	0.7432	0.765278	0.772456	0.57014	0.554022	0.477546	0.493303	0.49945	0.774937	0.762221	0.753004	0.79738	0.556095	0.86152	0.8542	0.849447	0.867195	0.889339	0.880076	0.870227	0.844623	0.880981
cg10549071		AGTCATCTCTGCAGGGTCCCAGCTGAACACCCGCCTATCTGTTTGCCGATGCTGGTCAAG[CG]TAAGGCTTGCTCCAATAAATTGAGTAAGAAATGAAAATCTTCAAGCCATGACAATTCAGC	0.518964	0.362343	0.431479	0.492428	0.393649	0.153729	0.146305	0.119785	0.11108	0.0898332	0.357095	0.438548	0.490561	0.327432	0.0947127	0.808039	0.791415	0.783101	0.793571	0.807629	0.807199	0.808896	0.717826	0.798622
cg18835300	PCDH7	ACAAACAAAAATTCTTCATTTCCTGATTTCTCTTTCAGACCTTCTATGGAGGAATTGTCT[CG]ACCAACATGGGCTAGAAAGAAACTAATCAAATGAAAGGACTATATTTCTTTGAAAAAGGC	0.601579	0.584468	0.623738	0.605572	0.471423	0.217213	0.33191	0.289845	0.372925	0.169148	0.64018	0.605573	0.661065	0.555073	0.16175	0.852274	0.861485	0.824403	0.840569	0.889716	0.870579	0.877151	0.840947	0.856083
cg04090745	HLA-DQB2	CCTCAGTTCCCTCTGTAGCATCAAACAGAGGATGCTGAGGTCCAGGGCATATCATCATCA[CG]TTCCCCAATATCTGTGTAAAGGTAAAATCAGCTCATGAGGACACAGAACTTCAGCTTGAT	0.286224	0.327037	0.283479	0.37116	0.332238	0.100077	0.117187	0.0564096	0.0938563	0.0775023	0.402145	0.308443	0.414801	0.315787	0.0772879	0.78732	0.776907	0.82897	0.802501	0.704035	0.723838	0.778244	0.728263	0.575037
cg16226642	OR5P3	TCAGAGATGACCACTAGAATATATAAAGAATCCAGTAACTCAATCTTCTAAGGCCAAAGA[CG]TGATTGAAGGGAGACATAAATGTCAGAATAGACCAAGACTCATGGAAAAGAACAGCTGTT	0.486397	0.51332	0.495026	0.621965	0.501293	0.216994	0.319533	0.318192	0.402708	0.531933	0.552154	0.524856	0.654887	0.556142	0.417057	0.794369	0.775891	0.800577	0.767818	0.816169	0.789176	0.810148	0.766442	0.779235
cg13562266		ATCTCTAATTTTTCAGAGGCTGGGGTGGGCCTAGAAAACAAGACCCCTGAGTTCCAGGCT[CG]GGTGCCATTGGAACACCCAGATTATGGACGGGGCGGCCTTGAAGTGGACGTGAGGATGAG	0.647408	0.616547	0.661998	0.669612	0.587819	0.365548	0.508184	0.376797	0.440446	0.49803	0.665283	0.673624	0.687618	0.638266	0.474528	0.8448	0.861753	0.847186	0.825227	0.840109	0.826988	0.822778	0.785443	0.839358
cg10775173	PRKAG2	AGAGTGAGCACTCCAGACGCGAAAGGGCCCGGCCCAGCCAGCTTGCGGGGACCCCCGAGA[CG]AGGTCCCTGCCAGACTGCCAATGTTTATTTGAGGCTATTTGTTTAAATTCAACTTGAACC	0.539543	0.50208	0.559144	0.53386	0.515858	0.11978	0.336927	0.326578	0.213867	0.214205	0.521566	0.587372	0.556635	0.497764	0.372448	0.836687	0.840019	0.828143	0.839253	0.832097	0.811165	0.816567	0.701065	0.838823
cg17253459	OLFML3	GCATTTTAGTGTCCGAGAGGATAATTGCTAAGGGAGCAGAGACCTCTTCACACCTTCATG[CG]CTTAGACCTGCCTAGAGGCTCAGATGGCTCAGTGGCACTGCTCACAGAGAACACAGGCTG	0.493664	0.433242	0.435465	0.527541	0.447215	0.310251	0.12906	0.287395	0.090793	0.124613	0.421822	0.482011	0.533633	0.432023	0.251705	0.775454	0.800103	0.773909	0.792686	0.798877	0.801078	0.735425	0.683675	0.658946
cg13615100	TRPM1	TCATTGCTGGCAGGAATGTAAAAGAGTACAGCCACTGTGGAAACCAGTATGGCAGTTCCT[CG]AAAATGAAACACAGGATTATCCTATGATCCAGCAGTTAAGCAGGTCTCAATAGGGATTTT	0.593857	0.660506	0.695144	0.667026	0.619757	0.472191	0.503282	0.477826	0.331394	0.227324	0.689272	0.696046	0.665783	0.693011	0.390619	0.866088	0.829865	0.823402	0.863587	0.874987	0.841261	0.870264	0.818489	0.868556
cg03477679		GACTGCAGACGACTTTGCCTGGATCCAGGCGGCAAACTCAGGTGGTGGAAAGGGGAAGCC[CG]CCATCTAGGAATTGAGGACCGAGGTGCCCACATCTCAGTATCGATCAAACAGAGCCCAGA	0.33246	0.350452	0.417922	0.408221	0.370831	0.206488	0.142376	0.113024	0.0952154	0.0714454	0.352774	0.40609	0.415633	0.353806	0.0798111	0.189882	0.209067	0.210478	0.200076	0.222571	0.211591	0.206442	0.214612	0.192024
cg12179011	C20orf56	CACTGCGCGCGGGAGTGGCTCCCAAGTCTGCCTGACCCGCGACGACACTGATCCTGCCCT[CG]CCCAGCCAGCAGATGTCCTGGGCAAAACCAACACCAGACTCCCCTTTGCGCTGTCGGCCT	0.3877	0.420018	0.386804	0.283039	0.33657	0.0857508	0.185983	0.123716	0.114846	0.31283	0.43694	0.416418	0.290993	0.355937	0.117287	0.119671	0.109838	0.203153	0.108251	0.1249	0.110552	0.117256	0.108298	0.130517
cg25133753	WFDC11	GCAAAGGTTCAAGATACAAAATCAATGTACAAAAATCAGCATTTCTAGCAGCATTTCAAT[CG]TATGAAATGCATAGAAATATGTCCAAGCTGAGAGTCAAATCAAGAATGCAATCCCACTCA	0.469094	0.381249	0.4956	0.505278	0.500427	0.0769331	0.0936406	0.32191	0.189769	0.152174	0.442483	0.567455	0.529833	0.480236	0.257578	0.775555	0.769249	0.805493	0.771774	0.772778	0.774427	0.731136	0.687352	0.738398
cg00288945	SLC37A1	TCCCTGTTCTTTCTTACACTTTCTCAGGGAGATTCTTGACTGTATTTTCCAACTTTGTAT[CG]ACCATTTTACTTTTCCTGCCATATTTTCAATGTTTACTGATGTTTCTCTGCCCTTTCAGT	0.649701	0.623851	0.706444	0.630658	0.5969	0.25698	0.295406	0.238975	0.36986	0.15508	0.653777	0.68501	0.663965	0.641285	0.222902	0.867787	0.851192	0.842961	0.842131	0.873547	0.8632	0.877786	0.816917	0.863673
cg08567760	C20orf79	CCACTTAATGGGACTTAAGTGTTACCTAGTTTTAGAGGAATAAGAATAACTTCTGTCTCA[CG]TTGGGTTTCACTGAGGAGATGTCTGCATTGGAAAGACAGAGCTCATGTCACTAAAGAAGC	0.498901	0.371257	0.480154	0.471787	0.446485	0.194298	0.258199	0.129021	0.144026	0.202259	0.410945	0.478984	0.495863	0.40072	0.301256	0.775518	0.777973	0.773919	0.755977	NA	0.722719	0.738319	0.66595	0.742507
cg04719215	GPR139	TCCCAAATCCTTGCTTTTTGGCTCTGCTGACTTATTTTGTGTGTCTCGAGAAGTGAGAAA[CG]TCTTTCTTACTTAAAAAGGAGGAGGAAAGGGGGAAAGAGATGGAGTTTTAGGAATAGGTG	0.439349	0.434623	0.413186	0.481058	0.336611	0.193782	0.331276	0.19119	0.146267	0.418535	0.441151	0.408228	0.471383	0.375387	0.182641	0.769337	0.773625	0.780817	0.764046	0.762607	0.752995	0.75387	0.663097	0.790233
cg21603914		AAAGAGATAAAAATGGAAATATCAAGGCAGCAACTTCTCTTCTGATTACAAAGCAGGCAG[CG]GGAAGCAGCGGGAGCCCATGAGGACGCAGCTGCACAGCCGGGCGGGCCTGATAAGGCCTC	0.348676	0.3872	0.39956	0.261141	0.387099	0.100472	0.131185	0.241021	0.129065	0.422794	0.37398	0.403624	0.256815	0.365011	0.134998	0.740985	0.761471	0.775758	0.755418	0.732336	0.710868	0.748309	0.615515	0.742362
cg21789085	MYOM2	GCCAAGTAGGCTGAGCCCAGCATAACCACACTGGGTTTCTTTTTGTTGAAAGTGGAGGCT[CG]TTTGCCTGTTGCACACCCAGTAACCAATCCCACCAACGTCTTCAGGCTCACTCTGAGCCC	0.624268	0.562806	0.54762	0.678823	0.602371	0.215589	0.408686	0.2832	0.414679	0.192744	0.559853	0.568528	0.670682	0.624212	0.542207	0.854211	0.838972	0.82491	0.889323	0.841758	0.865654	0.849945	0.823307	0.86211
cg14253388	SMOC2	CGTGATCTCCATCAGGGGAGAGGGTGACCCCAGCCTTTACTCAAACAGCAGCACTGGGTT[CG]TGATCTCCATCAGTCCTCAGGGCCCCTTCTGCTGAGTGAGAGGGGAAAAAGCCAGAACAG	0.572353	0.569855	0.600129	0.605045	0.531879	0.273262	0.395841	0.377005	0.292722	0.317457	0.63058	0.634656	0.606956	0.5774	0.142678	0.768402	0.777039	0.771	0.795627	0.767371	0.745865	0.780762	0.712379	0.752911
cg22089361		AAGGATCTGTGAGAAAAAAGAAATCCTTTCTCCCCTACAGGGAAGATGCTGAGTGTATCA[CG]GAGGCAGATCCCCAGTTGACAAAAGTAATTCTCCAGAGAAAGGGGGAGCTAAAAATTGTC	0.431974	0.413245	0.495499	0.4631	0.421724	0.227368	0.236403	0.181779	0.329003	0.17985	0.415779	0.483562	0.472258	0.4374	0.277672	0.654043	0.638331	0.664283	0.6071	0.63455	0.631911	0.610603	0.709403	0.688497
cg05594873	ROBO1	TCATGGGAGAGGTATAGGTCCATAAGAAACAAAGTCATCTTACCAACTGGATATCTGCTC[CG]AGCTGCTGCTGCTTCCTCTTCCTTTTTTTGGGGGGTGGGGGCCGATTTTGGAAGGGCAAA	0.537355	0.478371	0.593877	0.5835	0.483047	0.153943	0.285558	0.137801	0.200057	0.107841	0.542414	0.570791	0.576232	0.510316	0.221225	0.807347	0.811897	0.837709	0.81731	0.792087	0.800006	0.801782	0.760253	0.808036
cg02592239	CST9L	AGGTCAAGACAGCTGCAGGTGAAGAGAGTCATGCTGCCTGACCCAACACTGGGGTGGTCC[CG]AGTGTCTCCTCACAGGAGACTTCACCCATCACAGACAGAAGAAAGTAGCTAGTGTGTGGG	0.647278	0.651535	0.631064	0.642138	0.654222	0.438867	0.486878	0.477538	0.358146	0.318417	0.662864	0.672524	0.660374	0.661757	0.449976	0.841623	0.835464	0.812854	0.806978	0.832842	0.807707	0.833053	0.755371	0.850929
cg27548752		CACACAGTACAGCATCATCCCTTGTCTCATGCAGCTTCCAGATGTCTCATTGGACATTCA[CG]AAGGAAGGGTAATATTCAAAATGTTTTGCCACTGGTACTGTAATATAAATTAGTATATGT	0.556303	0.429704	0.339271	0.293477	0.377744	0.0900394	0.120294	0.107911	0.182081	0.136012	0.287192	0.296315	0.251565	0.358487	0.220795	0.867159	0.847338	0.888054	0.847057	0.860826	0.847977	0.85524	0.824108	0.873074
cg23400451	MYH4	CTCTAATGAGGTGGGAACCACATATTTTTATTTAAGGTGGGAGGAAAGTCATGGTATCCA[CG]ATATTCTCCCTGTGGATTGAAAAGATGGATGGGCCATCACATATGCCCATAATACTCATA	0.588777	0.478741	0.556369	0.631618	0.517972	0.402107	0.305641	0.355941	0.325343	0.0878095	0.560122	0.579656	0.608087	0.536065	0.0900495	0.861051	0.836885	0.836244	0.840644	0.835103	0.856407	0.845519	0.803247	0.833519
cg01947943	OR2W1	CCAGGAGAGATGCAAGAATGATGGCTGTGTTACCCACCAATGTAATTAAGTAGAAGATGG[CG]ACAACTCCTGACAGGATCATCTCCATTTTTGGATGGTTAGAGAAGCCAAGCAGAATAAAA	0.511301	0.514782	0.463718	0.6055	0.392044	0.247846	0.258835	0.1048	0.324851	0.115952	0.482909	0.481527	0.593209	0.474257	0.189443	0.868991	0.853011	0.83678	0.856887	0.841731	0.85628	0.87192	0.82325	0.856491
cg09702315		TTCTGAATTCAGATTCGTTCACAGGCTGCTGACGACAATGCGGCCTCCTCAGGGGTTTCT[CG]GGACTCCTGCTTACCCTGCTGTCCTGGAGAACCTTGGGCAGCCTGATATTGATGAGCCCC	0.611543	0.530563	0.577479	0.610824	0.534311	0.435787	0.314053	0.273735	0.446233	0.454888	0.541061	0.619244	0.618478	0.548671	0.430376	0.774237	0.793882	0.787245	0.779509	0.782786	0.767369	0.784211	0.738204	0.775709
cg02341759	AGBL1	TGTGTTCTCATTGCAGAGCTCCTCTGACAAGGAGTCCATCCTGACCATCCTCAAGGTCCT[CG]GAGATCTGCTTTCTGTTGGTGAGTAGGCCATGCTCTCATGCTTTCATATGGCGGATGTGG	0.636528	0.563425	0.5823	0.627534	0.611193	0.339616	0.409639	0.400876	0.394633	0.384237	0.584535	0.623853	0.634508	0.619221	0.405025	0.796161	0.769811	0.789587	0.782409	0.768842	0.771738	0.766048	0.736132	0.77878
cg03330377	CDK6	CAGTGAGTTTTTAAATTCAATTTGTAGGCCCTAGCAAAAATGTCTTTGTATTTTGACCCT[CG]ATCAAAGGAAAGGCAGAACTCACTTTTCCATGTGAGACTTTGAGTAGACCTGACCTTGAA	0.647426	0.632576	0.632188	0.616269	0.522343	0.231181	0.334033	0.248408	0.27045	0.433645	0.598831	0.634951	0.660339	0.551705	0.275608	0.857062	0.844469	0.867331	0.851673	0.858452	0.87473	0.834246	0.82855	0.867563
cg13461554		CCTTTATTCCTGTAGGAGACATCTCCCTGGGAGCCTCTAGTCAACTACTCCAAATGTGGA[CG]AGCTGCTATCTCAGTTTGCTGCCCAGTTATCATCTTAAGATTCTTTTGACCTCTTTCCTG	0.433154	0.435448	0.553563	0.381431	0.321293	0.11248	0.198224	0.150907	0.260884	0.148758	0.486295	0.542937	0.473282	0.422482	0.105928	0.862155	0.809831	0.792632	0.841774	0.826254	0.811289	0.854513	0.774468	0.858695
cg19925780		CTTCCAAGCCTCTGCTTTTCTTCCCCATCCACTCATCTGACATTGCTATTCATCCTATTT[CG]TATTTCTTTTATAGCACTGACTAATTCAACTATAATGGTTTCTCTGAGTGTTTCCTAAAC	0.526591	0.392434	0.308299	0.463864	0.361415	0.248395	0.110916	0.0610422	0.0788109	0.0826245	0.307528	0.273182	0.419172	0.360068	0.106729	0.820046	0.819054	0.836294	0.844449	0.837731	0.836343	0.820861	0.763905	0.849904
cg12491169	LRRC4C	CAAGCAAAAAAAACCAATTATTAGATTAGATTTATTCTAAGTGTCTTTCTGGAGTAATGT[CG]GTGATATAGTGTATCAGCTAAAGCCATCATGTGTGAGACAAATTAAAAACAAATCTAATA	0.742578	0.692161	0.727915	0.73031	0.699122	0.395523	0.464322	0.431726	0.573328	0.291684	0.703903	0.770527	0.737618	0.717652	0.387105	0.850529	0.862348	0.810849	0.830885	0.843113	0.849746	0.835086	0.831672	0.877338
cg23917513	LMX1A	AGCCCATGCCTTGCTTTGGCCTGTGGGATGTGATGTGTCTGATATCCAGCAAGAGATTTT[CG]ATGGGCTTCCCACTTTGACTTGGCCTCTTGCTTCCTGCCAACCTCATGAGAACAACAAGC	0.47192	0.347402	0.49016	0.512562	0.413919	0.157769	0.209137	0.238693	0.304682	0.283266	0.407439	0.478222	0.541635	0.457402	0.268352	0.776127	0.772012	0.791203	0.785641	0.729501	0.768216	0.751746	0.725677	0.7677
cg08014964	MYH4	CCATTCTGCAAACACAGCAGCCACCTCAGCTGTCCTAGCTGGGAACCTACTTGGCAAAAC[CG]TTTTTGGCAATCTCTTTGCACAATATTCACTGACTGTGGCTGTGAATGGATATAATTAGA	0.492623	0.357997	0.443038	0.468563	0.305804	0.166498	0.134797	0.168173	0.242878	0.116662	0.475266	0.462552	0.474943	0.380851	0.163494	0.795271	0.784311	0.779591	0.804124	0.793902	0.775846	0.803256	0.737598	0.784887
cg14143954		CTCAGGTGATCTGCCCACCTCGGCCACCTAAAGTGCTTGGATTACAGTCATGAGCCACCA[CG]TTTGGTCTGTGGGTGCTTTCTTAAAAGACCTACAGAAGATGTGAGGCCCTTGAGCTTGAA	0.502911	0.460893	0.471014	0.547074	0.501582	0.304572	0.288088	0.213916	0.377314	0.428629	0.52431	0.522372	0.556799	0.500036	0.310449	0.688564	0.6865	0.698203	0.687098	0.709913	0.696544	0.67617	0.646316	0.708773
cg05627696		CTGCATTTTCTTCTCTGTGTCTCTTCCTCAACTGGCACGTCCCACCAGAAACTCCTTCAC[CG]TGAGTCCTTGTGTCAGTCTGATTCTGTGGAACTCAAGCTAAAATGTGAAATTCACACCTA	0.696187	0.659064	0.657397	0.627596	0.687728	0.25297	0.415032	0.505589	0.453743	0.248138	0.689487	0.687253	0.711184	0.659868	0.428885	0.86272	0.850149	0.845166	0.819177	0.874157	0.849391	0.849419	0.790029	0.82367
cg07652189		GAAAGGAAAGATGAGAGGTATTGAGAAAGCTTCTGTCTTCTTAGAGAATACATAAATAAT[CG]TGTACAGAATGTTGGTGGAAATATGGCTAATAAAGGCCATTCTGATGAGGTGTCTGACAG	0.456409	0.264999	0.379764	0.374893	0.384513	0.109165	0.090926	0.0824076	0.092809	0.0920067	0.188294	0.270446	0.262049	0.246064	0.0849019	0.748068	0.745529	0.747056	0.714719	0.735425	0.708312	0.732723	0.651565	0.730248
cg02378063		TGTTTGCTTTTATTGTGTTTTCACCTAAGACTTCAGAATAGAACTTGAAAATGCAGAGGG[CG]AGTGAGTTCCACTGGGACACAGAAAAACTAGTATTTTAGATGTGAAACATTAAGTTGTCT	0.61829	0.547837	0.646691	0.640899	0.613007	0.297768	0.319758	0.315522	0.512122	0.291169	0.594775	0.681953	0.69574	0.609934	0.234963	0.847154	0.867807	0.839495	0.848898	0.83507	0.851011	0.863054	0.786216	0.869326
cg18438823	OR51E1	TGCTCATCATTGAATCCCCCAGCAAAGTGCCTAGAACATAATAGTGCTTATGCTTGACAC[CG]GTTATTTTTCATCAAACCTGATTCCTTCTGTCCTGAACACATAGCCAGGCAATTTTCCAG	0.609598	0.650761	0.602809	0.702274	0.630574	0.333109	0.434083	0.262907	0.495703	0.424786	0.646966	0.614948	0.7032	0.63969	0.482083	0.828102	0.846833	0.84244	0.847426	0.846288	0.806122	0.822956	0.808514	0.834057
cg11397476		AAGAGAGGAAATGAAAGGAGTAGGTCGTAGAATACAATTTTTCTCCTTTGTTAAGAATCA[CG]ATATTGGGTGTATGAGAATGATCCCTTACAAATGAAATTCTTCTTAGAGGAATCAGTTGT	0.613226	0.601255	0.660627	0.587863	0.675077	0.208708	0.330824	0.128826	0.312058	0.372234	0.642382	0.670905	0.630434	0.633374	0.299898	0.859691	0.850972	0.833346	0.845164	0.843173	0.839538	0.822916	0.787031	0.836344
cg11177552		TCAGGCAGGCCAGCCAGGCAGCTGGCTGTCATATCTGTCACACCTGAGCCATGGTGTCCA[CG]ACACTCCTACCTAGTGGGGGAGAAATTCCATTTGTTGAAGAGCAGAAAGAGCTTGGGCCT	0.593902	0.579263	0.687328	0.599276	0.55038	0.277426	0.176232	0.233084	0.414183	0.176847	0.679134	0.702299	0.620704	0.655818	0.283921	0.863467	0.884658	0.87338	0.870702	0.844122	0.829523	0.872548	0.813239	0.856565
cg10769535	DNM3	ATATTCTGAATATGTAGTTCTCTCACTTTCCCTCCATAGGATTCTGATCAAAGCTAGAGT[CG]CCTCAAACAAGAGCTTGATTAATTGCCCTTCTGAAGATCAAAATGTGAGAAAATTTCTAG	0.468736	0.500307	0.492051	0.603862	0.452549	0.186438	0.19115	0.208022	0.214844	0.153297	0.477066	0.516783	0.559398	0.499794	0.423681	0.776235	0.757774	0.761249	0.748833	0.818858	0.80121	0.835294	0.782255	0.756551
cg27454698		GAGGACCCGGGAGCAGCGAATATTTGATCATCGTTCCAGGGACTTTCTGGAATGAATGAA[CG]TTGGCCTCTCTTGGTCTTTTTATCAAAGAGTTCAGGATTTGGATTCCGGGGAAGGTCATC	0.707897	0.602744	0.656128	0.686061	0.644623	0.260099	0.485803	0.387255	0.508731	0.193169	0.628835	0.687607	0.679558	0.621627	0.358171	0.890884	0.867859	0.758414	0.887777	0.879683	0.858062	0.880347	0.826728	0.868793
cg01577083		GCCTCAAAAGGGGGCTCGTGACTCAGACTTACCTGTGTTCCTTTTCTTCAACAGTGACAA[CG]ACAAATAAACCATTTGGTCATTTGGTGCCCTTGGTTCCAAGTTGTGGGCACTGGTTTTGG	0.533902	0.532665	0.58397	0.625103	0.453402	0.367912	0.34784	0.321158	0.332892	0.393203	0.559995	0.601801	0.627148	0.520353	0.463744	0.877038	0.871546	0.840856	0.877833	0.864381	0.865323	0.85434	0.809087	0.850883
cg00562553	HOXA4	TCGAACCCAGGCCCAGCCCCGGCCCACCTCCCGCGCCTCCCAAGCGGCGCCACGTACCGG[CG]CTGACATGGATCTTCTTCATCCAGGGGTACACCACGGGCTCCTTGCCCTTCAGGCCCAGC	0.555039	0.427362	0.461804	0.443531	0.416227	0.198609	0.261718	0.195689	0.260428	0.180202	0.415892	0.486713	0.440501	0.382147	0.35499	0.240141	0.237728	0.186567	0.212444	0.210128	0.246066	0.213529	0.225695	0.177298
cg20468163		TTCAGGGCACTGGGCTGGTTCAGGAGGGTGGTCTCAGGGTGGGTAGGGAAGCTGGCCTGT[CG]TAGCAACTCACTCAGACCTGTCTTCATTAAAGACCTTAGAGAAGGAGAAAGGGCTTGAAG	0.667445	0.703121	0.706165	0.73078	0.731902	0.458219	0.330707	0.300857	0.311228	0.603246	0.720935	0.700719	0.741084	0.666704	0.54662	0.870129	0.852773	0.853715	0.858615	0.873097	0.858347	0.848938	0.819929	0.84345
cg00794381	FMO1	CTTACAGCAATATTGCCTTCACAGTTATAAACTGTATTCAAATAGTAAAGGCCACCCTCT[CG]CTTCCCTGGCTGGCCCCAGGGCTACCACTGGTATTCCTGAGCCTCTCCCAGCTCCACTTC	0.699877	0.736902	0.767768	0.752401	0.740225	0.572514	0.504519	0.549996	0.420092	0.281122	0.75445	0.778618	0.765679	0.773085	0.335493	0.870072	0.860948	0.871227	0.867115	0.883184	0.860767	0.865547	0.849055	0.860776
cg19265886	OR6C2	CCATCTACAGGTACTAGAGGGTTGAGAATAAGGAATGCCAGCAGAGAAGAATAAAAAGAC[CG]GGGAAAGGCTCAGGGACAACGGTTGTATTCTGTTGTCATTGTTGTTTGTTTGTTTTTCAG	0.641847	0.611034	0.642168	0.692457	0.57107	0.188448	0.388657	0.231841	0.427706	0.458501	0.632597	0.630997	0.688836	0.640808	0.558162	0.871385	0.811305	0.829403	0.840794	0.833276	0.843501	0.861756	0.814635	0.865341
cg15194531	FMNL1	CCCTGGAGCTGAAGGTGGAGGAGCTGGAGGAGAAGGGGTTAATCCGTATTCTGCGGGGGC[CG]GGGGATGCTGTCTCCATCGAGATCCTCCCCGTCGCTGTGGCAACTCCGAGCGGCGGTGAT	0.333577	0.310169	0.413861	0.477647	0.412751	0.0978183	0.138963	0.224371	0.21319	0.124448	0.329103	0.42545	0.461768	0.346516	0.133887	0.0837564	0.0742645	0.0882212	0.0825016	0.0964365	0.0963184	0.0937028	0.0983315	0.0906952
cg06922938		AGATTTCCCCCCCCTGCAATTTCTCTTATTGACATGCCAGCAGTGTTAGAGACAGATGGG[CG]TGATTCCGTTCATTGTTACCTTCTGAAATGAAAGCTGCCACATAATAATTACCGGTGAGA	0.572107	0.544354	0.545932	0.57268	0.546237	0.198157	0.412365	0.345711	0.369763	0.303165	0.574985	0.574077	0.562099	0.476104	0.130532	0.805062	0.833681	0.768562	0.786238	0.797493	0.776586	0.748015	0.664433	0.701608
cg01878960	PTPRN2	CTTAACTCGGACGGCAAACTTCCCGTCTGGGATCTGCAGGCTTCAACAACTGTCAAAGCA[CG]GGAAAATCCCCAGGAAGAAAGTAAGCAAAGGCACGGTAGACGCCAAGGGTCCAGGAGTCG	0.651755	0.584198	0.688171	0.580704	0.573595	0.370992	0.391829	0.450451	0.334523	0.145353	0.598988	0.656027	0.578483	0.585013	0.364781	0.880548	0.866584	0.856196	0.865171	0.872598	0.838836	0.845681	0.831283	0.853209
cg07068768	CRYBB3	TGTCAGAAAGTGCTCATAAATAGCATGCCCCTTGCGAAGACAGGCGAGTCTGCAGACGGC[CG]TGGCTCCTCTGTTCTTCCCGAGGCTACAGCAACAGGTTCATTCTGGGATGGGTTGGGGGT	0.588321	0.646393	0.723769	0.683665	0.646479	0.120791	0.404612	0.254598	0.256334	0.210104	0.66455	0.698178	0.714623	0.596555	0.393235	0.909662	0.884316	0.900836	0.904561	0.88619	0.877339	0.885675	0.866627	0.90368
cg02153340		AGGAGAAGTTGATCCCGGTGCTGGTGAGTGTGCCCAGACCTCCCAGCATCCATGGCCAGC[CG]GGGAGGGGACGGGAACACACAGACCCACACAGAGACTCAGGAGAGCATGGAGGTCAGAAG	0.557535	0.500305	0.561335	0.66823	0.480669	0.326869	0.390369	0.33683	0.285595	0.545911	0.602266	0.617449	0.667721	0.529767	0.291133	0.893283	0.862067	0.834147	0.878213	0.891507	0.870151	0.875195	0.859804	0.887903
cg09849688	ARID1A	GGTCTGCAGAGTCCCTTAGTACCTGGTGTTCAGGCTTCTGAGGCCAGAATGCAGATAGGA[CG]TCTGAGATTGTTGACTTTCTCAACTGAGGAATTGGGGGAAGGAAGTGCCTTAATAAAGTG	0.509297	0.370259	0.440806	0.506343	0.312253	0.109162	0.183451	0.190387	0.215809	0.145092	0.339396	0.429543	0.537478	0.278234	0.143297	0.819524	0.834534	0.818199	0.814903	0.831096	0.829747	0.846051	0.77569	0.832422
cg01934566		GGTAACAGATTTCTAAAGGATTCACAATATACCAATGTACCATGGCAAACCAATTGAGAA[CG]CTTATATTTTTGCATAACAGACAAAGCCACTCCTTCATTTAAAGGGACAACTTTAAATAA	0.601074	0.533727	0.491091	0.597374	0.6098	0.145144	0.304192	0.165205	0.134979	0.544262	0.494268	0.540042	0.614722	0.486158	0.566816	0.856818	0.796581	0.824981	0.836755	0.788294	0.799123	0.795516	0.785195	0.810451
cg09726866	FRAS1	TTTCCATCTTGTTGTTCGGTCTCCCAAAAAAATTTGGTTTTAAGTGGGAAGGGATAGAAA[CG]GTACCATAAGAATTATTTCTTTGATTTGAAATTGCTGTTTTCTTGCACTGCAGGACTCCC	0.426145	0.261622	0.458489	0.487475	0.374635	0.101586	0.0809743	0.0965678	0.206177	0.1513	0.282323	0.470938	0.45865	0.305704	0.174731	0.82745	0.844427	0.816232	0.777983	0.834887	0.799952	0.810232	0.76174	0.851839
cg03438216		GCAGGCAACCATGGAGCGCGGACATGCTCAGAGACAGCCCTGAGTGTCTCGCTGCAGAAT[CG]CCTGTGGTTGTTGATGAAAGCACTCACTAATGATTTGTTCCTCTACCTGGGCATTTTGAA	0.355039	0.373265	0.348015	0.359373	0.364421	0.103611	0.142117	0.201456	0.166209	0.0780375	0.371339	0.354121	0.347302	0.38086	0.0954391	0.524823	0.543147	0.591494	0.606666	0.561986	0.57867	0.534684	0.483399	0.45764
cg14127046		TCAGCTGTTCTCAGTCCCACCTGAACATTGAATCATTTGGAGAGTTTAAAAGCAACTCAC[CG]ACAACAAAACCAAAACACACAAAGAAAGAAACAACCACATTCTCCAGGCCCCATCCCAAG	0.556374	0.390454	0.469942	0.322469	0.312028	0.156617	0.166148	0.113678	0.148097	0.428491	0.307188	0.411104	0.248808	0.258136	0.188372	0.873455	0.880428	0.863271	0.853469	0.872963	0.871569	0.857811	0.846564	0.860882
cg04742334	LOC339568	AGTGGATTCATCTCTGCAAGAGGCTAAGTACTGTTACAAGAAATTGATGGAAGACCCCAA[CG]TCTTATCAGTTTTCCACATCCAATGGGCTCTGTCTACTCTACCTTGTCCCTTTTTATTAC	0.547529	0.568123	0.635	0.596139	0.553818	0.285346	0.222556	0.461656	0.174164	0.246847	0.601184	0.655008	0.597086	0.619875	0.258858	0.793356	0.772341	0.783942	0.808385	0.774014	0.796945	0.808365	0.738139	0.821845
cg10725390	MEIS1	GCATTTATTAATAGGAATTCTTACATTTGCCTGAAGATGAATTATTGCAAACAATTAAAA[CG]TGCTTAATATTTGCATATGAGTCACTGTGTATTCACAATCAGTTCAGGGGCATATGTCAT	0.653409	0.691859	0.714716	0.752558	0.693294	0.506203	0.595928	0.426839	0.350333	0.226746	0.730644	0.658267	0.674401	0.7907	0.544987	0.338975	0.395612	0.342138	0.337913	0.328623	0.303621	0.496003	0.421986	0.519307
cg26166717	PARK2	CATAATGCAGCAGGTCCCAGGTGTAACCCGGAGGAAAAGGCAGACAAGGTCCTGCGATGC[CG]CAGCTGAAAGGAAGCTGACGCCAACGGGCTTCTCAGAAGAACAATGACTCATTAGTCCCG	0.542816	0.330946	0.43348	0.373074	0.320119	0.239167	0.105462	0.0995285	0.0926734	0.48615	0.33312	0.443229	0.361609	0.3669	0.16896	0.852675	0.858639	0.844015	0.828678	0.839966	0.845047	0.834068	0.777246	0.795793
cg14293892	DIO2	AATTTTCCAACTGGGCTCCATCCATGCCAAATAGAGCCAAGGCAATACCCTTTATCTTAA[CG]TAGACAGTAGCTTCCCTAATGTAGTAATTATTCAGGTAAGTCTTTTCTTCTGGTCTCAAA	0.671604	0.577356	0.618161	0.562314	0.566964	0.376639	0.290434	0.463853	0.42909	0.165545	0.605751	0.607283	0.581578	0.593091	0.335087	0.860249	0.874604	0.842164	0.824261	0.85049	0.838286	0.819043	0.786929	0.839093
cg26480662	PTPRN2	GCCTCGCTCAGAAAGCTCCTCCAAGATGCCACCGCGTGTGAAATGCTTGGGGTTGAATCT[CG]AGAGCAGGGAGACCAGCCAGACAGCCCACCTGGCTGACGAGACCCGGCCTCGCTTAGAAA	0.523412	0.557584	NA	0.549285	0.478911	0.381439	0.243983	0.315149	0.162419	0.569268	0.539825	0.506907	0.563432	0.50935	0.381563	0.820544	0.819805	0.795835	0.839251	0.802373	0.798752	0.815738	0.733758	0.843375
cg13117953	PTPRN2	TTGCTCCTTCTCTCCTAAGTGCACCCTTTATCTCTCCTTCCTGCTTCACTGCCTGCTGAA[CG]GATCCTCCTACAAATGCTTGTAAGGGTGAGAGCCCACATCCCTGTCTTATTTCTGGTGTT	0.600676	0.568459	0.600657	0.637611	0.67861	0.292295	0.442602	0.423763	0.480741	0.431087	0.595093	0.65373	0.659118	0.608767	0.496781	0.857469	0.855186	0.813595	0.844488	0.804492	0.836898	0.843308	0.820667	0.790422
cg13666041	ACTN1	AGGAAGCACTTCTCAATGCATCATTTAACCTGATTCCCCAGAAGAGTCCTGAGGGCTCCA[CG]GGCAGAAATGTGTCCCATTTACAGAGGAGGAAACCTAATGGAAATGCCACAAGAACGGGA	0.480675	0.290444	0.454384	0.480374	0.400656	0.112148	0.12699	0.156145	0.192078	0.12473	0.344263	0.451065	0.523811	0.30125	0.102046	0.823373	0.831202	0.821646	0.82872	0.827048	0.828814	0.805753	0.739772	0.811725
cg09675299		AGGCTCTTGGCTAGAATGCATAGTTATAGACATAGTCTTGAATACAATACTGCAAACATC[CG]GGCCTGAGGCCCTGAATATAGATCCTTCAGAGCAATAGTGAAAACAAAACCAGTTGATGT	0.676866	0.710397	0.646196	0.642011	0.647631	0.555968	0.351515	0.268632	0.386273	0.259035	0.707109	0.664525	0.649169	0.711397	0.164763	0.828096	0.821925	0.803611	0.818992	0.836622	0.800907	0.852357	0.795606	0.814897
cg19250417	CRMP1	TCTCTTTACACACAAGTTGACTAATTGTTTCACAGGAAGAACTAAAGCAGCAAGACCTGT[CG]GCAGATCTGAAGCCCTTACCATGCACCTAGCACACTAAATGCTTTGGAGGGTCACCTAGG	0.67446	0.645559	0.717298	0.71174	0.712862	0.424451	0.484791	0.300208	0.280624	0.416776	0.66485	0.726037	0.753869	0.708226	0.219537	0.857488	0.859578	0.867474	0.837396	0.87992	0.847406	0.850715	0.821114	0.859644
cg14162627	ZNF322B	AGCATTTAGCACAGTACATTGTAATTATTTCATTGTTTCCCACTGAAACCAAGAGCTTCT[CG]AGGGCAAGGGCTGTATCTTTTTTCTCTATAACCCTAAAACCTAAGACATAGTAGTGAATG	0.428699	0.354405	0.380108	0.400888	0.392	0.137236	0.208261	0.132351	0.234673	0.12707	0.369177	0.418275	0.412997	0.3831	0.170646	0.530436	0.54138	0.537507	0.54538	0.527559	0.539983	0.512081	0.518287	0.547034
cg15583285		GAGAAGGCATTTTTGTTCTTAGCCACAGGGGCTGCTGAGTGGAAACCATCACATGTTAAA[CG]TGCACACCATGGTTTTGACCCATGCTTTCTGTTCAGATCCTAAGGCTACTCGAATAGTTG	0.364099	0.442295	0.361166	0.340614	0.451883	0.119175	0.239198	0.175175	0.154708	0.342106	0.383967	0.360868	0.366918	0.427409	0.56125	0.152042	0.174043	0.222909	0.173622	0.183626	0.201086	0.17754	0.158502	0.172221
cg15066503	VIPR1	ACCTATCTTAGTGGTTCCCCACCGAAGTGGACTGGCCCCTGGGTCAGTCTGGTGGGAGGA[CG]GTGCAACCCAAGGACTGAGGGACTCTGAAGCCTCTGGGAAATGAGAAGGCAGCCACCAGC	0.697377	0.650127	0.654554	0.680374	0.677104	0.453289	0.43641	0.485282	0.41821	0.378613	0.628746	0.661718	0.699996	0.667361	0.426079	0.822226	0.827759	0.830944	0.792165	0.798206	0.756615	0.818202	0.76493	0.799598
cg26129110	ADCY2	ACTCCATGTTATTCCCTTTTCTCTGGTTCTAAACTATAATCAAGTGAATCTTCTCCCCAT[CG]ATTTCAAGTTTGCAGTCACTGAGCTGAGAAGTACAAGTTTGGATTTCTGCATGGTTAATT	0.701268	0.602833	0.680285	0.609089	0.624356	0.284321	0.366448	0.281481	0.399819	0.294916	0.642385	0.752539	0.638536	0.649141	0.152743	0.865014	0.86781	0.857502	0.83474	0.864198	0.843182	0.863715	0.821184	0.861265
cg05431528		AAATGCTTAAGCCAGTTGGCTTTCAGTCTCATGCCTTATTTCCTCCAAGGCATGCCTCAA[CG]CATTGTTTGTCTCATTGCTTAAATATGTCCAGAAGGAATGATCATGTATCTAATAGACTA	0.657015	0.689875	0.647691	0.675514	0.581152	0.124771	0.450493	0.286114	0.182394	0.468065	0.64473	0.614413	0.569589	0.655293	0.472198	0.870336	0.830587	0.843921	0.861929	0.867881	0.846432	0.878304	0.834897	0.831483
cg22061523	AFMID	CCTTGGAAGAAGATGTCTGCAGAGGTAGGTGGATTGCAGGGAGGGACTAAGGGGCTGGGG[CG]GAGTTAGCTCATTTATTAGATTGGAATTCCAAGAAGGAAGCTTAGAAGCCGTCTAGAGCA	0.314115	0.32046	0.224183	0.295109	0.325287	0.0841645	0.103496	0.0968144	0.097756	0.107348	0.311671	0.254779	0.272497	0.323688	0.111011	0.303311	0.309853	0.289133	0.354241	0.2846	0.298778	0.124472	0.109131	0.0902939
cg02222791		CACAACGACCACACTAAGAGTAGGGTTTACATGTGCATTCACAAGATACTAAACAAGAAA[CG]CAATTGCCATTCAGTCATGTGATATCCCAGTGGAAATGAAATGTATTTAGTGAACTTCAG	0.589825	0.523407	0.616824	0.65469	0.57788	0.228061	0.399344	0.382957	0.206503	0.261013	0.605728	0.590771	0.655409	0.627505	0.406926	0.823254	0.85753	0.773178	0.824851	0.86111	0.805331	0.84034	0.790461	0.868847
cg08157459		CCCAGGCCTGCCAGGCCTAGCATGTCCTGCCTCCTCCCCTAGCTTCATCTGTGGCTACTT[CG]CCTTCACTCTTCAGCTATTGTAGGACCATTTAGGGGACTGTGTCCCCTAAAAAGATATGT	0.507776	0.565169	0.56993	0.578058	0.597154	0.226277	0.338627	0.231742	0.434699	0.348822	0.555784	0.567823	0.588945	0.594106	0.169389	0.812394	0.800265	0.798293	0.799804	0.815918	0.792607	0.796474	0.725177	0.834489
cg26808478	DNAJC11	TGGAAAACCTGAGAGATGGAATTAGGAATTCTCTGGCAGGGCTGAAAAGTCTGGACCCAT[CG]GCTTAAAGAAACTGATCCACCTCATGACCTGACCCTGGAAGCCTTCTCGCCCTTCACACC	0.299615	0.251505	0.337755	0.306273	0.411686	0.0950058	0.134995	0.105835	0.107894	0.0996676	0.271675	0.340067	0.309959	0.294681	0.083052	0.708028	0.706778	0.724102	0.710899	0.676273	0.695574	0.673409	0.570798	0.703936
cg07927909	ADAM3A	CGTGGGAGCCTGCATTTCTGGGTACGTGGGCTCTTTTTTCTAAAGAGTTGACATTTACAA[CG]CATTCAGGGGTAACATAGGGTTATAAAGCACATTTCTACTCTAGACCTTTTGCTGATGAA	0.680161	0.674874	0.68784	0.578116	0.681775	0.36955	0.350912	0.379083	0.367936	0.388152	0.689637	0.695579	0.587359	0.673983	0.5666	0.871929	0.860495	0.869325	0.873403	0.867668	0.879529	0.88993	0.84656	0.876329
cg09085201		ATGACTTTACTGAGCTTCGTTTCTCCCATATGGCCTCCTGGATCCTTCTCTCAGGCTCCA[CG]CTCCCCACACAGTTGGTCTAGGTGTCTCCCACCCCTAACCCAACCTGGGTCAGGAGCCCT	0.514896	0.460925	0.516755	0.565296	0.456209	0.210918	0.180693	0.37885	0.290962	0.0775583	0.483909	0.555583	0.575279	0.50234	0.136949	0.771688	0.770219	0.771189	0.773961	0.759732	0.756391	0.775713	0.689961	0.774367
cg24552844	AMICA1	TGGTTTTAAAGATAACAATTTAAAGTGCAGGAATGCCACAGAGAAACTTTCCCTTTGTCA[CG]TAAGAGGGTCCCAGAACACCCTTTAGGACCCAAATGCATTCTGTTTCTAATGGAAACAGG	0.442956	0.248864	0.378143	0.447631	0.350871	0.126627	0.159943	0.14179	0.156049	0.180679	0.264869	0.428918	0.445724	0.252274	0.317291	0.708978	0.684399	0.690777	0.713451	0.757362	0.707548	0.713224	0.713998	0.734891
cg23834919		GCCGGCTCCCTTGAAGACCGTCTTGAGAAAGGGCTAGAGAGGCTTTTAGTGCAAGCCCCA[CG]GGATCACAAGTTGAAAGAAGTATTTACATGTGTCAGTACCCTCTCATTCCTGAACTTCAA	0.529555	0.417764	0.539462	0.471149	0.335957	0.173937	0.239422	0.19284	0.300947	0.474648	0.421884	0.466731	0.398135	0.314139	0.0981786	0.875841	0.87058	0.8653	0.847016	0.871665	0.85685	0.851959	0.791333	0.878822
cg14992768		TTGTTAATGAATAGTGTACTGATAAAATGAAAGGATGTTTTAGAAAGACTTTCTTAGATG[CG]AGATCATGTGGATCTGGAATGGATAGAAATCAGGGAGTTTAGAACAATCATTTACTTTTG	0.557307	0.526909	0.619197	0.63638	0.478559	0.301343	0.272012	0.108883	0.403094	0.319143	0.545412	0.627603	0.644945	0.546164	0.299293	0.899814	0.879968	0.87813	0.892788	0.861357	0.850605	0.867053	0.821676	0.886055
cg10322879	YWHAQ	AAAGGGACAGCCTTTTTGTGAGCACAGTATTACCTTGCCCCTGCCCCAAACAATTAACCA[CG]TAAAAAAAATAAAGATGTAGTTGAGGAAAAATGTTCACCCTGTCTTCCAACTCAGGTACT	0.601078	0.442636	0.503649	0.603506	0.497826	0.146143	0.201772	0.155005	0.313974	0.65418	0.413888	0.542649	0.572894	0.465992	0.293377	0.821186	0.837276	0.850893	0.834553	0.829351	0.780734	0.836642	0.813629	0.857967
cg26467762		CCTACCATACATCAGTTTCTGATGGTTGTCAGCAATTCTTGTCATTCTTTGGCTAGTAGA[CG]CTTCAATCTGCCTTCACTTCACACGGCAGCCTCCACATTGTGTATCTAAAGCTTTCTGTG	0.755759	0.699345	0.750825	0.689149	0.731748	0.408542	0.524627	0.637438	0.491931	0.605911	0.727269	0.801273	0.727107	0.718958	0.486571	0.872407	0.863493	0.852444	0.868871	0.852267	0.876686	0.888143	0.849822	0.869688
cg05612673	TRHDE	TCCTATGCTACCAACATTGTACTACAATAGTATTCCATAGCTTATTTTCCACACATACTT[CG]CTACTTCTTTCCTGTGTGTGTGTGTGTGTGTGTGTGTGTGTGTGTGTGTGTTTTCCACTA	0.631646	0.495007	0.648272	0.565058	0.527568	0.296485	0.261455	0.362368	0.318451	0.131584	0.593222	0.65747	0.539387	0.539682	0.183509	0.883676	0.867483	0.805607	0.873392	0.869777	0.843248	0.860158	0.840185	0.867166
cg19582822	KLK2	TAAGTTGGAGGTCCAGCTTCTGGGCTCAGACGGGTATAGGGACCAGGAAGTCTCACAATC[CG]ATCATTCTGATATTTCAGGGCATATTAGGTTTGGGGTGCAAAGGAAGTACTTGGGACTTA	0.528631	0.597022	0.548463	0.529317	0.595906	0.278061	0.411659	0.277422	0.330888	0.33431	0.639478	0.591677	0.56934	0.639968	0.351211	0.783081	0.763644	0.749826	0.742541	0.759307	0.727783	0.73712	0.698558	0.746889
cg15946224		TCTCTTATTTTATTCAATGCCAAGATTTCCCAAGATGAAGGAGATGGTGGATCCTCAGCA[CG]AATATGGTAATGTGGCTGGTGCCACTACAAACCCTGTAAACAGTGTAACTGTGGAGGCTG	0.37108	0.252345	0.34901	0.437372	0.357619	0.0878067	0.12393	0.136039	0.119649	0.0760873	0.260131	0.384178	0.464699	0.279574	0.0935229	0.789518	0.767413	0.78635	0.796932	0.777289	0.766786	0.734389	NA	0.721067
cg09418852		GGCAGAGCTCTTTATGAGAGCGGAGCCTTCTGGTGGGGGGCTTTCTCTGTCAGTGAGTGG[CG]GGCATGAATGGAATCCTATCAGGGGCTCTGGGCCAGTGAAGACCCTTCTTCATGTGTTTC	0.523315	0.526123	0.541275	0.578332	0.529487	0.22587	0.34061	0.339875	0.352656	0.228437	0.480576	0.579611	0.572145	0.534614	0.29267	0.739528	0.725029	0.717555	0.769197	0.756833	0.758193	0.755516	0.677649	0.792684
cg07985589	OPCML	CCACTAGAAACAGAGAAATGAGAACTAAAGTTTATTGAACATTGACAATGTGCCAGGCAC[CG]TGCTAGGAACTTAACATCAATTTTCTTGTATAATTGCCCATCAGGATGGGTTATCCACAT	0.622171	0.499205	0.522823	0.611918	0.562982	0.270067	0.305116	0.363754	0.367359	0.172485	0.554677	0.579303	0.60839	0.59499	0.269821	0.893967	0.783808	0.805427	0.798453	0.814068	0.805441	0.818966	0.779613	0.852158
cg02536838	ANGPT1	CGGCGGGATCGTCTTACAAATTGGCTAGATGCGCATGACCTCGATCATGTATGGCCCTCC[CG]CCCCTTTCCACAGACAATTGCCTTGAGCCTTTAGCAGATTCATGGCAAATCAATAAATAG	0.582308	0.644484	0.545983	0.619742	0.591621	0.376383	0.205936	0.369867	0.234864	0.24743	0.639169	0.550284	0.630124	0.621856	0.283446	0.406075	0.431186	0.465402	0.394787	0.428415	0.374714	0.425224	0.365677	0.42524
cg01741688	SH3RF3	GTTCAGAGTCATTTTGCAGGAAAGAGTAACTGCTGGTGCTACTGGCAGGGCCACTGTTTG[CG]TTTTCTCATTCCCTCCCTCATCCTTCCTGCTGCAAACAGGAGATGTTGGCGGATGCTGTC	0.44055	0.382588	0.51855	0.552927	0.387541	0.105113	0.205335	0.167323	0.111267	0.0870225	0.437017	0.522608	0.588139	0.373924	0.0931713	0.817398	0.82527	0.787591	0.823796	0.819748	0.804103	0.804217	0.763344	0.792201
cg13054613	GRM7	GACAGTGGAAGCTGGAATTGTAGGATCCAAGCATCTCAGCATCAGCAGTTCTCCTGGGAA[CG]CCACCAAGCTCTTAGCTTGCATTGTAGTAAAGAAAATACATAACAGAGAAAACTGTCTTC	0.536608	0.530396	0.616398	0.5907	0.489484	0.202388	0.350735	0.246073	0.380833	0.14456	0.578373	0.634881	0.568387	0.555761	0.249637	0.798757	0.793658	0.800584	0.794982	0.775005	0.763803	0.776478	0.757572	0.777965
cg19388972		TTCATCTGGTCCTTTAACATTTTCCCTTCACTTCTCTTCAGAGTTTTTTCTTGAAGGGCT[CG]AGGACTGAAGCATCCCACAAAATGATTCTATTGAATAATTCTGAGCAGCTGCTGGCCCTA	0.562787	0.481109	0.522744	0.618773	0.613757	0.210848	0.363766	0.23815	0.416008	0.340567	0.499451	0.50974	0.712671	0.54086	0.14281	0.833935	0.845572	0.76039	0.845703	0.839939	0.838053	0.797663	0.830223	0.873564
cg21377158	SFMBT2	TAAGTAATACACTATGGAAGCCACAAACGTAATGCTAAACTTTACATTTGCAGCCAGCCA[CG]TTAAGAACAAAAAAGAATAAATTTAATTCTAACAATATATTTTAACCCAATATATCCAAA	0.556643	0.537593	0.554022	0.674229	0.545143	0.264881	0.198059	0.405247	0.398875	0.261756	0.553175	0.600143	0.645836	0.552883	0.401338	0.842604	0.869582	0.875286	0.830044	0.821083	0.832594	0.846283	0.799337	0.825345
cg17805202	CHRM3	GGGTTTATTGGGAGGACTAAACCAAGGTAACCTAACCTAAATCCTAGCATTTATGTGTCC[CG]TGATCAACATGCCAGTAATACCAGGACTCTTCCTAATTGGTCTGTATGCAGGGATTGAAC	0.661008	0.616026	0.723225	0.642893	0.687907	0.457015	0.407751	0.328097	0.412979	0.225072	0.715717	0.697168	0.703245	0.735555	0.246034	0.910814	0.861303	0.887971	0.861702	0.867828	0.863186	0.882061	0.829019	0.876734
cg08297082	SIM2	TGGGAGGCGCGCTGCTCAGGGTTCTGGTGGGTCCTCTGGGCCCAGGAGCTGGGAGGGCTG[CG]CCGGCCTCTGGAGCCCCGGGAGCCAGTGCCGAGGTAGGGAGACAACTTCCGCCGCAGGGC	0.390941	0.287842	0.407935	0.403852	0.480528	0.127567	0.123001	0.118355	0.181449	0.585383	0.304788	0.460198	0.399296	0.456107	0.779417	0.104499	0.115713	0.0992697	0.126846	0.108879	0.106378	0.107808	0.100293	0.103434
cg27461542		TTGATATTTTTCTGACCTGCGGGAGACTCTTTGTGACTCAGTTTGTTTGACTCATAAACC[CG]CAGGCCACTGGTTTGAAACCTAAGCCACTACCAGAGCTGATTACAACCTCTGGGAGAGCC	0.516021	0.33794	0.449302	0.540746	0.392567	0.30212	0.109354	0.16138	0.193018	0.298035	0.306326	0.440223	0.523494	0.304711	0.0814499	0.870339	0.876243	0.878031	0.872432	0.864122	0.857424	0.870235	0.773041	0.879387
cg16000077	LTB4R2	TTCCAGAGCTGCCTGCTGCAGTCACACTTAGGTCATCTTCTCTCACTTTTCTCCTTTTGC[CG]ATTAGTGGACGTGACAGAGATGTGAATGGGGCAGGGATGTCCTTTGATGGCATCAAGACT	0.347816	0.321487	0.478393	0.429446	0.415054	0.12278	0.260898	0.169067	0.186488	0.183691	0.361465	0.479756	0.446668	0.379814	0.149631	0.769445	0.749795	0.798831	0.779144	0.770334	0.778999	0.787034	0.656196	0.754708
cg14694075	HNF1B	AGAAGCCACTAAAATGTGATTGGAATGTGAGATGGTGCTCAGAAACCAGCTCCACAGGCC[CG]AGTGGGGATTGAGCCCTGAAGATAGAAGGCTGGACTTGGCTGTTCTCCCCCAAACCCACA	0.489108	0.274191	0.390416	0.42363	0.348882	0.148278	0.181068	0.193984	0.153299	0.258575	0.266869	0.440077	0.419476	0.304963	0.454021	0.730668	0.748138	0.764749	0.743487	0.779942	0.759314	0.747764	0.700315	0.747887
cg05759948	MBL2	ATTTATTCACCAGAAATGACTTACTGGTGTTTCTGCAGAGCAGGGACTCAGTGACAAGGA[CG]CTGGCCCTCTAGCCTGGGGCTCTGGCAGATGCCTCAGAGTGAGGGAGGAGGCTGGGCTCA	0.517811	0.551064	0.580049	0.546572	0.5089	0.395197	0.318111	0.264086	0.126611	0.108933	0.590704	0.598709	0.557664	0.54925	0.196426	0.725759	0.723867	0.712514	0.727892	0.743336	0.727123	0.748996	0.671261	0.751929
cg00555894		ATTGCTATTGTTAATAATAATAATGAAAATAATATTATTAGGTCTATATTCTAAACAGAC[CG]AGGACACTGAGAAGCCTAGATACAGTGAGACTGGCCAGTTTTGTTTCCTAGAGAGTGTCA	0.49405	0.564712	0.609829	0.590057	0.479544	0.239684	0.384679	0.346662	0.218544	0.152187	0.611801	0.605458	0.644304	0.51647	0.233963	0.843897	0.852579	0.857926	0.857487	0.84976	0.842389	0.852725	0.773243	0.841217
cg12740910	GJA5	TGTCTGTCCTCTCTTCTGGGCACATGTACAGTGTTCAGCACCTTCAGGGTCAGCCACACA[CG]TGCAGTGACTGAACTATGGTAAATGTCTGAGAAAAAGAGGGAGGGAGAGAAGGGGAGGAA	0.557601	0.526008	0.594585	0.633968	0.56925	0.319178	0.287869	0.129689	0.145233	0.249446	0.590468	0.631876	0.66043	0.56789	0.257821	0.787407	0.763486	0.812003	0.763448	0.764831	0.752436	0.772778	0.735759	0.781669
cg25015813		GGGAAATGTATTTCGGAGGCATACACAACAGAGGAAGGTGTCTGGGGGCCCAGGACAAAC[CG]GCAGTTGACAGCGTAGTGGCTTTTCAGAAACAAGTCTTGTCAGAAATGTGACTTTTTCTG	0.574451	0.453668	0.566511	0.559756	0.590961	0.181549	0.209062	0.186834	0.413542	0.283473	0.471934	0.562026	0.57131	0.550283	0.589595	0.776095	0.805163	0.81312	0.820939	0.822036	0.798065	0.813861	0.765537	0.848665
cg24686270	C5orf46	GGAGGCTTAGGAATTTGGGGAAGTCTGGCTTTGGGTCTTTGCCCGAGTCGTCTGGCTTGT[CG]TCTGGCTTGTCTGGTTTGTCGTCTGAAAAACAACAGAATCTCAGAGGTGATTCTCAGCAA	0.447467	0.440842	0.447831	0.46863	0.487407	0.365603	0.176164	0.188626	0.127837	0.482766	0.44683	0.510309	0.45508	0.395985	0.206231	0.623569	0.617198	0.626606	0.632925	0.61885	0.598961	0.612003	0.561503	0.639438
cg17336354		GTCTCTTTGGTGACTATGAAGCTTTAGTCAGTCTTGGTTTAGCCATTGTAAAGGGGTCAG[CG]ATTGTGATGGGGTTTCATGCCCAGAAGTTGATGCCACAGCAACTCTAGTCCCCTCTTGGC	0.663182	0.632112	0.719184	0.68911	0.679381	0.411023	0.469913	0.474834	0.437306	0.234973	0.712816	0.747911	0.705175	0.703847	0.38797	0.818344	0.8266	0.833967	0.827639	0.825979	0.813949	0.832197	0.805688	0.847897
cg15355719	RASGRP2	CACAGATCTGATCACCCCCACTGGCCCCTGCCCACAGCCACAGAGCCCAGGGCCAAAGGT[CG]ACCTAGAGGCCACAGCTCAGCTCAGAGCTCGGGTCAGAAGCTAGACTCAGGACAAAGCCT	0.648456	0.640023	0.637697	0.664647	0.560442	0.330898	0.341207	0.163991	0.487816	0.481969	0.639587	0.631885	0.719273	0.594046	0.501132	0.821909	0.820902	0.843496	0.825344	0.851994	0.825169	0.823726	0.789064	0.839364
cg21806273	NLRP3	CTCTCCTCAAGCTACTCAAGCTGAGGCTTTGTGTGCATGCCTGCCACATACCAGCCATTC[CG]TGAGTGTTAGTGGAACAGGTGAGTCAATGAGTCAGGGAGTAAAATTTGTGCTTTAAAAGT	0.457707	0.454923	0.505081	0.512089	0.431971	0.130006	0.228086	0.152783	0.170795	0.228809	0.46989	0.51953	0.562763	0.446203	0.37097	0.750921	0.744961	0.771329	0.747205	0.751528	0.74422	0.734881	0.632747	0.739862
cg14069529		TTTAGTCGATAAGCTTGGGGGACTCTTTCTTGCAGTGTAGTCAGAGTTCCAACAGCTGAG[CG]ATTTCTTGAATCTGCACCATACCTTTCCCCCATGGGGATCAGGCAAAAAGTTTTAGCCAG	0.716458	0.696171	0.742453	0.756938	0.68717	0.320998	0.608422	0.274658	0.434277	0.463231	0.727008	0.788567	0.720496	0.644245	0.285376	0.850966	0.837125	0.806886	0.848243	0.860178	0.824815	0.845207	0.850211	0.849547
cg09832613	SDK1	GAGAAAGCCTTTGCATTCACCTCTTATTATTCAGACATGATAAGCCTGTGGGCTTGAATT[CG]TTTTCTTCATTCTTTCAGACTCTCCATGGAAGGTGCATCTGTCAAACGTTGGCCCTGAGA	0.464315	0.400319	0.56897	0.484376	0.393201	0.150584	0.206248	0.175813	0.339481	0.102194	0.481213	0.576889	0.520823	0.458381	0.128776	0.766461	0.755746	0.772533	0.755167	0.776151	0.763262	0.787808	0.737507	0.786223
cg26343116		TCTGCTTAACTCAGCTCTGTGCACACAGTGGGTCCTTCTTACCTAATGACTTCTGGGCTT[CG]TCCATCTGTTCCTTTGTTCATTTGTTGAGCACCTACTGTGTGCTGGCTCTGTGCTAGGAG	0.58664	0.51758	0.575197	0.639115	0.514643	0.288653	0.358342	0.286719	0.402134	0.273651	0.548638	0.603617	0.651332	0.5651	0.352161	0.80085	0.799821	0.828304	0.769363	0.805316	0.789468	0.789367	0.777367	0.787702
cg00063346	OBSCN	GCCCATCCTGTGGATTCTCAGAAGTCTGACATCCTTCCTTCATTTTGTCCCATCTCTGTT[CG]AATCAGTTCAAGCTAGCAGCATTTCCTCTGGTATAAAGGTCTCAAAAACTTTGTCCCATG	0.579122	0.505222	0.602051	0.549633	0.510918	0.257567	0.303394	0.270733	0.357952	0.291318	0.55885	0.602526	0.570174	0.557485	0.585139	0.687937	0.705072	0.7511	0.703798	0.72369	0.70931	0.731072	0.717449	0.742189
cg13565300	GDF10	AAGTGCCCTCTGCCCAGCTCCATCCAAGGGGCTGAGGAAGTGGAAAGGTGGGACAGAGGC[CG]GAGATAGGCAGAGTGTTCCCACTGCCTAAGCCCCTGGGCCTTTCCTTAAACCCCTGTGGT	0.607798	0.559017	0.610488	0.640868	0.584474	0.201874	0.382411	0.401533	0.461735	0.339052	0.628477	0.685699	0.673061	0.636877	0.38878	0.787204	0.779921	0.795118	0.784276	0.786174	0.778663	0.767068	0.722847	0.772129
cg06576557	PLUNC	ATAGAACCTACCAAGATAACAGGTGTGAAAGTGCTTTGTCCCAGTAAGGGGTAAAATAGA[CG]TGGATCCTAACTAGGTTATTTATTTCAGTTACCTGTCACATGGGGAGACTGTGTCAAACC	0.37475	0.360475	0.304304	0.294698	0.500127	0.171191	0.192659	0.159526	0.134771	0.165688	0.376653	0.341621	0.310737	0.417659	0.297571	0.757541	0.777848	0.762057	0.772344	0.74789	0.759824	0.749569	0.681453	0.782319
cg08431709		TCTAAAGCTGACCCCACAAAGTTGACTTTCCTTGGTAAAAAACTTTTCAGAAACTTGTCA[CG]AAAGAAGAGCTGCTGGTAAAAATTCAGAGGCCACCTCCTGTTAGCTGTTCTCCAGGTGCC	0.550343	0.613363	0.660039	0.655729	0.641122	0.346832	0.212674	0.350884	0.457024	0.179187	0.630169	0.605015	0.61018	0.677803	0.34941	0.848913	0.803102	0.808003	0.888397	0.826425	0.850679	0.860648	0.800688	0.835288
cg12510717	GPC5	ACAAGGCTGCGCTGCTGCTAGCTGCAATGCCCATAACCACTGTCTCCACTGCCACACCAC[CG]TTCTTCTGTCTGTAGGGAGGTAAAATAGTGCTTCTAAGGTGGTTTACAGATTCACACAAT	0.563486	0.548659	0.588174	0.641516	0.596021	0.210187	0.395328	0.372167	0.367794	0.227415	0.575082	0.602585	0.715058	0.594567	0.350217	0.797765	0.783579	0.807048	0.817934	0.815639	0.764957	0.797372	0.733985	0.814027
cg04065143	CNTN4	CACTTCCTCCCTCCTCTTCAGCTGCATTGACCTTTCTGTTCTGCATACTCACCATCCTCC[CG]TCCTCTGCAGGCCACTGGTACATACTGAGTGCATCGTCTGCCTGAAACGCTTTTCCTTCC	0.356441	0.346088	0.473595	0.420299	0.285505	0.0987906	0.140628	0.110949	0.154267	0.11366	0.370191	0.475015	0.400652	0.310787	0.107957	0.697095	0.696207	0.653382	0.655376	0.669768	0.656855	0.698393	0.720498	0.653588
cg06790305	KRTAP19-8	GCAAAAGCAAGAAATATTGTATTATCACAACAGAAGAATGAAAATGCTCCTTTGCTTTCT[CG]GTTGGTGAGCTTTCTCATTTTGATTTTTGATCTATATGCTGATTGGTCTGTTCCTTTCCT	0.516977	0.500959	0.571461	0.563618	0.433517	0.166147	0.319682	0.294922	0.265834	0.277941	0.547277	0.581466	0.6006	0.51152	0.295912	0.789977	0.760427	0.78833	0.780813	0.822748	0.799419	0.820936	0.741718	0.765562
cg06691616		GGAGGCGGAGAATGCAATGAGCACAGATCATGCCACTGCACTCCATCCTGGGCTACAGAG[CG]AGACCCTGTCTCAGCAAAAAGAAAACAAAAAAAGATGTAGTCTCATGGAGGTCAATAGCC	0.527577	0.227448	0.420656	0.333071	0.410572	0.0891591	0.0915345	0.102828	0.101083	0.120631	0.218115	0.390633	0.289606	0.349725	0.267817	0.841761	0.857711	0.863064	0.854468	0.855055	0.843164	0.851514	0.818786	0.876694
cg05358758	KRT71	CAGGTGCCTTTATATGTGCTTGGCACTGGGGCTTGTGGATGGGCAGTCAAGAGCTTAATT[CG]TGGGTTTGGCTTGCCTGGGAGCAAGAAGTCATTTTCTCTATGCTGAGCTAGAGATCAAGC	0.473145	0.422864	0.523145	0.518684	0.348205	0.121907	0.262944	0.212861	0.232414	0.263999	0.457032	0.562895	0.533232	0.475027	0.291086	0.825251	0.822291	0.80581	0.820553	0.840575	0.796849	0.794557	0.738348	0.832687
cg14371731	ZMIZ1	GGCGGCGGCCCCATTAGCGGAGCCTCCGCCTATGATTGGCTTCGCCCGGGAAGCTGGAGA[CG]GGCGATGAATAATTGATGTGTGCGGTGCGGTAGCCGGACGGCGGCGGCGGTGGCGGGCAG	0.175313	0.290114	0.291278	0.268128	0.208313	0.0424749	0.0537849	0.0495145	0.0255417	0.0279416	0.257221	0.318141	0.283886	0.339147	0.0392435	0.0231504	0.0256602	0.027997	0.0358948	0.0268019	0.038954	0.0345795	0.0231226	0.0308124
cg16164607		AGCGGATGTCCTCTGGCTCACTCCATCTCCCTGTGACCTTGGGTAAACTATTTAGCCTCA[CG]GGGCCTCAGATGCCCCCCTGTGAAGTAGGAAAGGTGATAGCCCTCACCTCACAGAGTGTC	0.795346	0.714546	0.774613	0.801375	0.677986	0.469589	0.476285	0.588866	0.601741	0.34966	0.752292	0.796422	0.815325	0.714433	0.389032	0.448444	0.429814	0.440752	0.446052	0.447954	0.445561	0.393438	0.48405	0.514801
cg21800193	NOTCH4	GTAATAAGTAGATGAGACAATGCCTGTAAGATGCTCAGACAGTACCTGGCATAAAGTTGG[CG]ATTATTTTTCTGATTTCATTCAACTCCTTGATGTTGGCTCTGTTGCTGTCTCCCTGGGGC	0.701984	0.718155	0.731211	0.73899	0.742504	0.338178	0.473495	0.527978	0.587045	0.680889	0.711145	0.705478	0.758946	0.74663	0.63221	0.849925	0.85063	0.801383	0.840015	0.839637	0.861581	0.843063	0.804881	0.818766
cg23655970	PAX9	TTTAGGAAAGATTTGCTTATATGCTCGGAAAACTTCCAAATGCGCGAATACCAGCAATCC[CG]CTCGCCTTCAACGCGTGGGGTAAGGGGGGGTGGGGAACAATTACTGAGTGACGCTAATAT	0.459813	0.391346	0.608723	0.502141	0.470891	0.160197	0.165877	0.282035	0.133168	0.127478	0.415472	0.624547	0.485022	0.41243	0.175301	0.12668	0.124265	0.113439	0.132708	0.141952	0.114879	0.169909	0.133735	0.164149
cg17476285		AATGTTATATTTAATTACAAAAGTGAGAATTAACTTTCAGTTGTATCCTCTGTGTTTCTC[CG]AGGGTTGCAGCTTGCTGCTTTTTGTAGCTCATGTCTATGTGTGATTCACTATTGAGAATA	0.556246	0.564388	0.583973	0.605772	0.506768	0.352839	0.307365	0.335127	NA	0.427367	0.604939	0.611739	0.613227	0.567539	0.550223	0.753196	0.74204	0.739145	0.7551	0.770923	0.746263	0.790346	0.712433	0.772104
cg05662884		GCCAAGGTCCTCAGAGATAGGAATTTTTCTATTTCTTAGAGCATGTCTCCTGCATGAAGT[CG]GCATAGTGTAAGTCTGACTACCCTGAGACTGCAGACAACAGGAAGCCCAGGGTAATGTGG	0.57016	0.538651	0.581632	0.62735	0.630356	0.351139	0.335678	0.299456	0.236953	0.371977	0.569854	0.6224	0.643696	0.56733	0.399417	0.856073	0.874881	0.834381	0.841478	0.853857	0.846625	0.827749	0.751738	0.847913
cg07295362		AAAGGGGTTATGTACGCCTAGCCTGCCTTTTAATGATAAGGTGTTATTATACAAATGAAA[CG]CCAGTGTGTGCACAGCTATACCAGATGCTTTAAGAAAACACATTCTAGAGTCAGGGTGCT	0.476192	0.387688	0.424012	0.547519	0.517777	0.214101	0.186925	0.250393	0.351235	0.175131	0.423564	0.441114	0.55287	0.484889	0.320224	0.848278	0.866081	0.839109	0.815326	0.830488	0.811017	0.821323	0.776696	0.724276
cg21828432	C17orf77	TTTCCCAGGTGGTTGCATCATGTGCATTCCCACCTGCAGGGTATGAGGGCTCCAGGTACT[CG]AGAGTGTTTCCAACACTTGGTGTCAAGGTCAGTAATGTTAACTTTTGTTACAGGCCGAAA	0.533387	0.527437	0.60467	0.610421	0.546857	0.198354	0.172957	0.192433	0.434999	0.112578	0.607607	0.593152	0.657716	0.611132	0.18427	0.80176	0.821122	0.794425	0.772458	0.801349	0.776651	0.8177	0.726422	0.797468
cg21502551	HS6ST3	GGCTCATGCCAAGTGTGAGTTGCTGTCCTTGGGCAAGTTATGTAGCTGTGCTGTGTCCTG[CG]CCCTCACCTGTAAATGGAGATAATAGTAACCTACTTCATAGGGCAGTTGTGAGGATCCAT	0.649279	0.58294	0.655464	0.703168	0.625886	0.334757	0.416717	0.385281	0.455486	0.188269	0.624108	0.627731	0.719168	0.63371	0.372998	0.843975	0.867648	0.837445	0.830636	0.858626	0.834303	0.858738	0.81576	0.890512
cg00557402	FAM55D	TACCTTTAGCATGGATTCACAACCTTCTGCTTGTTTCAGCTAAGACAGAAGTGTCAGCCA[CG]TCAGCTCCACCTTAAGGAGGGGCCTGGATCACAAACTGTAGTTATTAGCTCAAGCAGAGG	0.538735	0.501009	0.628657	0.554639	0.516574	0.244018	0.365582	0.22229	0.375822	0.114198	0.54476	0.624371	0.596764	0.618395	0.101901	0.828975	0.758836	0.781918	0.815361	0.784521	0.769553	0.78269	0.739878	0.814402
cg24838764	SEMA5B	CGACACCTGCATTCAGCCTCACAGCGAGTAGCCAGGCAAGGTACTTAGTGGCAGGAGAAG[CG]AGCACAGGGAATCCATATAGCAAAAAGAAGAGGTGATGACATTCCTCAGGCACTTATTGG	0.696793	0.638346	0.718552	0.681451	0.658875	0.35122	0.495052	0.490378	0.505653	0.350055	0.67337	0.691459	0.665145	0.694995	0.585832	0.825288	0.829563	0.865232	0.842675	0.837951	0.820295	0.827216	0.809689	0.864156
cg24072947		AACTTAGGAGAGAGGAATCAGGAAGCCAAGATGGAGAACAAAGGTAACATTGGGGACAGA[CG]TTGAGGCCATGTATGAAGCACTCTTAAGAGGAGCAGTGAGAGACTGTACAAGCAGCTAGT	0.482241	0.389195	0.389597	0.440475	0.281488	0.158076	0.150811	0.0768833	0.107182	0.135849	0.351688	0.396473	0.436244	0.369826	0.185252	0.815901	0.833016	0.840322	0.827113	0.77749	0.808916	0.794598	0.683925	0.817882
cg01332462	MYO1D	AAATCGTCTGCAGGGCCTCCTCAAAACGGCGAAGAACTTTAGGAGGGCTTGGCCACTTCA[CG]TGCTTCCCGTAGTCTCGCATGGTCTTGACGCCATGGAAGCGTCTGGCCACCTCGTGGATG	0.429762	0.388314	0.415283	0.396403	0.304292	0.132867	0.27858	0.206449	0.11626	0.171496	0.376774	0.443925	0.380749	0.344467	0.406081	0.609665	0.609274	0.599476	0.632468	0.585595	0.59417	0.573496	0.612393	0.604016
cg27116510	IPO5	CTAGCAGGAGCCAGCTGACCTCCTGCGTGTCACAATAGCAGCCAGGTGTCTCCACGGTGA[CG]TCTCTGAGCCAGGAGGTCAGAACTGTGGGATTGATGACCTCCCACAACTGGAGCAGCCGG	0.527296	0.315868	0.362163	0.43708	0.315935	0.123139	0.0956812	0.118708	0.205435	0.301521	0.227497	0.377909	0.422861	0.217784	0.236396	0.786011	0.795771	0.808246	0.800491	0.777918	0.756629	0.781348	0.734968	0.810045
cg16473703		TGTTGGTTCCAAGAGCTGCCGCAGCTCCCCAAGGTTGATGTTGCCAGGGCTGAATGAATA[CG]GCCTTTGCGTTTCCCTGGCTACTGAACTCAAAGTACAGTACAAGGCGGGTTCTCCCCACT	0.514367	0.351094	0.438014	0.454141	0.57046	0.141561	0.158251	0.148628	0.219176	0.256261	0.346379	0.445524	0.487831	0.457629	0.455188	0.816702	0.794065	0.812924	0.796333	0.814856	0.819169	0.807668	0.796601	0.802734
cg26366554	KIAA1244	GAAGTCACCTTCTGCATTCTTTCTCATTAGTCATCTACAATTTTTTTTTTCTTTTGAGAC[CG]AGTTTCACTCTTGTTGCCCAGGCTGGAGAGCAATGGCACCATCTCGGCTTACTGCAATCT	0.502197	0.286816	0.424886	0.539384	0.441584	0.135279	0.107027	0.118556	0.150056	0.120188	0.25837	0.43719	0.451648	0.315832	0.111298	0.870253	0.843897	0.850486	0.82737	0.863718	0.863627	0.861509	0.805862	0.855355
cg11265874		TTTGCATGTGGGGGAAGGAATAAACTACTGATTCATACAATAACATGGATGAATCTCACT[CG]AAGGCATTATGGTGAGAGGACATACTTAAGATTCCACTTACATTAAATTCCGGAACAGGC	0.546311	0.407904	0.503383	0.523525	0.371042	0.137716	0.154939	0.179406	0.293823	0.218749	0.355459	0.523538	0.469338	0.351931	0.176119	0.847851	0.844359	0.796336	0.810103	0.826005	0.814686	0.819243	0.760118	0.800942
cg24553332		CTATCCTGGAGAATATTCTATGTGCTGATGAAAAAATGCATATTCTGTGGTTGTATAGAA[CG]ATCTGTAAATGTTAGGCCCATTTGGCCTAAAGTCCAGTTTAAATCCAATGTTCTTTGTTG	0.532922	0.396575	0.423011	0.471771	0.290581	0.193329	0.17987	0.161186	0.23124	0.127548	0.432431	0.436837	0.498679	0.3803	0.156385	0.7883	0.788971	0.711824	0.80062	0.811809	0.788135	0.823037	0.763505	0.816532
cg23898320	USP36	CCCCGCACCGCTCACTAACTGGGATCTGAGGCACTCTGAGCTCTGGGGCCTCTTCTCACC[CG]GACCCGGGGCTGCCTGGCGCCTCCCACGCCTACGTATCCATATGGTAGCTACTCACGCTG	0.500196	0.470068	0.429232	0.391293	0.364172	0.273823	0.192056	0.139512	0.127336	0.156512	0.446269	0.464436	0.367167	0.421513	0.158091	0.734715	0.732311	0.717321	0.734346	0.738706	0.721244	0.75352	0.646707	0.755289
cg22742060		CTACAAAAGGTAACAATAAGTACTATCTCAGTCACAGTGATACTGGGGGAAAGGGTGCTT[CG]GACTCCCCTTGATTCACATACAAATTCCTGAGTGGAGAGAACGGTTCTAGTCTTTAGTCC	0.596781	0.562475	0.626549	0.669762	0.598724	0.341736	0.344529	0.272939	0.440984	0.222162	0.563651	0.602149	0.620104	0.606344	0.389103	0.856801	0.801106	0.818001	0.796525	0.829205	0.778351	0.821672	NA	0.860795
cg00825734	SCNN1D	TGTCCGGGGGCCCTGCCGCTGACCTGTGGGGTCTCTGTGACATCAGCAAGCCCCCTGCCG[CG]AGCTTGGAGAGGCACCCCAGCCCCATCTGGCACTCAAGGAAATCAGCTCAGAGAGGTTGA	0.534079	0.539217	0.494663	0.459015	0.465456	0.110617	0.393582	0.212717	0.123283	0.378954	0.504331	0.519487	0.457411	0.495782	0.411735	0.722992	0.739811	0.719077	0.734858	0.739888	0.723596	0.713839	0.646544	0.726399
cg08540622	PLAC1L	AAATAACATGTAGACTTGCCCTTCTCTTTCTCTAATACTCTTTCCCCATTGGTGGTTGGG[CG]ACTGGATTCTCCAGGCTTTCCTGATGCAGAGCACTGTGTGGGTCACAGCTTTGGGGATCT	0.433088	0.513787	0.504025	0.564895	0.432887	0.14322	0.347423	0.31362	0.174325	0.386803	0.513572	0.505285	0.569112	0.471413	0.352887	0.769101	0.735928	0.75777	0.764884	0.757017	0.765057	0.705104	0.748616	0.782686
cg26394380	SFTPB	CAGGAGGTGCTGCCCATGGCCCCTGGGGACCCCTCCAGGGTAGGGGCTGGGGCATAGCTG[CG]ATGGTTCAGCAGAAAGAAACTGTCCTCTGCAGCTGCAGGGGCTCTCAGGCAGGGCCCCCA	0.558177	0.511021	0.591958	0.554222	0.497075	0.145508	0.321278	0.15213	0.357386	0.43081	0.508792	0.529416	0.452458	0.481215	0.624715	0.769001	0.751536	0.752585	0.780685	0.771557	0.77436	0.77094	0.693116	0.765407
cg17327217	SELI	GGAAGAGTAGTTTAATTCAAGTAGTTTAATTGAACATATTAGTCATTGGTCTGTCTGGGA[CG]TGCAGTGTTCATAGTAGCAATGTATGTACCATTTATTTTATCTGGTTGTGTGTGATGTGT	0.549008	0.44278	0.563777	0.614547	0.461556	0.159025	0.224916	0.117947	0.169382	0.317323	0.391884	0.500757	0.510279	0.351657	0.156643	0.841737	0.798353	0.841316	0.780885	0.834083	0.812774	0.841382	0.800636	0.831908
cg27128233	SFMBT2	GAGCAGAGACGGGTTCTGACGGTTCTGCTGGTGAGTTCTGTTCTGGAAATGCTGCTGCCA[CG]TGGAGATGTTTTGCAGGGGATGGAAAGGGAGTTGTGAGTGTGAGGCCATGGGTGTGGGCA	0.539996	0.47327	0.62137	0.53418	0.574254	0.231535	0.278945	0.285465	0.333894	0.18142	0.512999	0.627241	0.616435	0.603092	0.232126	0.802767	0.8285	0.782083	0.787456	0.737139	0.716547	0.77644	0.758309	0.796659
cg08189448	PAPPA	GATTGATTAGTCATGATCCCCGCAGTTTTAACAGGGACTCATTCAATTGGGAAGGTGGAG[CG]CTGGGGAGCAGATTAGCATACGCTTGTTTACTCATCTTCTGAGGGATTTTTTCCCCCTCT	0.410291	0.328468	0.352992	0.419764	0.255427	0.104454	NA	0.137244	0.0854449	0.0853065	0.196642	0.278486	0.265354	0.258412	0.0874289	0.0864674	0.0825499	0.0856762	0.0833974	0.0887298	0.0910371	0.0901624	0.0773709	0.0793088
cg26198638		GACCATAAATCATCTTCGACAATGCAGTATCACTGGAGTGTCTCTGAATCTCCTGTGATT[CG]ACAGGTTGCCTGATTCATAAATTATTTGCTCATTTAAACTATGTTCAATTTAATTTGTCT	0.621026	0.683101	0.709442	0.710645	0.636161	0.425204	0.560024	0.395373	0.494593	0.471053	0.702463	0.719997	0.729924	0.665526	0.55455	0.860665	0.870791	0.865861	0.856764	0.86544	0.840913	0.857593	0.848699	0.832732
cg12885302		ACCCCGTGATGCTCCTTGTCACTACAGCTTTATGTTTTGGAGAATGACAAGTAAATTGAA[CG]AAGCAGTGTGTAACATCTTTAAGACCGGCTTCACTCAGCACAGTGTCTCTGAGATTCATC	0.611966	0.525781	0.555099	0.662123	0.626226	0.286557	0.38288	0.29203	0.3598	0.201157	0.562467	0.598609	0.625106	0.597928	0.232059	0.857598	0.854521	0.821701	0.855006	0.839802	0.868433	0.849063	0.803253	0.837249
cg20497968		TGGCAGCTAGAGGGTCAAGGAAATCCATGGAAAAGTCAGATGCCCCTGGGGCAGAGATCC[CG]AGCCCAGGCTGAGAAAATTACCTTTATATCTTAGAGGCAACTGGAGTCTAAGTCATTGAT	0.496936	0.40433	0.470352	0.501999	0.29828	0.133	0.272726	0.132751	0.175095	0.0927167	0.439064	0.49098	0.524808	0.399349	0.15476	0.82659	0.809301	0.794813	0.81352	0.833257	0.78811	0.780077	0.763511	0.816417
cg18148255		GGGGCTGGCAACAGAAAAAAATGCCAAGCAAGCTGAGCAGCATGGAGCAGTGACAGACAA[CG]AGAGGAAGCAAGGGAGTAAGGCCAACTCTGAGGAGTATATGCAGCAGATGAAATCTGAGG	0.475011	0.364857	0.311322	0.222082	0.272298	0.115045	0.0485906	0.0686858	0.0633726	0.0612097	0.327255	0.249119	0.162832	0.31121	0.0586345	0.763012	0.777374	0.770445	0.743938	0.75539	0.740732	0.769798	0.696504	0.730165
cg09378756	PCK2	AGCTTTCTCCACAACCTCCAACCATCTTCTAGGACTGCCAGGAGGCACAGAAGTCATGAA[CG]TTTGCAGTTTCCAGTCCCAGGCAAAATCTCAGTTCATGTCCCAACTCCACCAGTCACTGG	0.566854	0.403702	0.527828	0.523011	0.542872	0.150136	0.246837	0.276618	0.220836	0.596259	0.402582	0.531814	0.522177	0.448111	0.822993	0.80224	0.796789	0.804771	0.762327	0.809317	0.774322	0.802482	0.749825	0.832118
cg13128052	SLC37A1	GCAGAGAGTTTTAGCTCTGGGAGGTTTGGTGTCTTAGGGGAAATCACATTGTCACATGCT[CG]TGAACAGGTACCCAGGGTTCCAACTGCATCTATAACATTGGGTGGGCCGGCTTCTTACTA	0.613164	0.538358	0.627528	0.632877	0.549122	0.391667	0.370436	0.24021	0.404827	0.165495	0.585692	0.626045	0.640211	0.60277	0.28643	0.799351	0.797013	0.794536	0.77504	0.80907	0.782253	0.784746	0.765361	0.785717
cg04574507	CD1B	ACATTTGACTGCCTTAAGGCTTCAGGTTCTAGTCCCAACCACCAGAATGGTTGAAGAGGG[CG]GGAGACAGAAAGACCCAGACCCTTAGTGTCCAATTGCACCTAGGAAAGCCCTGCTTGCTT	0.57883	0.649165	0.687544	0.652878	0.611041	0.258301	0.363996	0.285832	0.391721	0.230025	0.673081	0.673927	0.634086	0.665597	0.34334	0.842732	0.813635	0.840457	0.812987	0.814953	0.823398	0.829824	0.792251	0.837639
cg14287403	MTR	GAGTGCAAAGCAGACTCACTCTGACAGGGAAGGCAGTCACTGCTGGAGCTTTTGAAAAAT[CG]TACACACTCCTGGACTTCAGCCCTTGAGTTTTGACTCATTTGGTCTGGGATGAGGCCTGG	0.517478	0.412681	0.536286	0.500566	0.543663	0.283549	0.228752	0.0843602	0.0847795	0.489223	0.407153	0.507761	0.420805	0.469413	0.317657	0.806095	0.82257	0.818921	0.79385	0.814876	0.800622	0.823255	0.710401	0.832318
cg00322262	ABLIM2	TGAGTTTTGGAAACAAGGACTCTGACCGAGCTCCAAAACTTGAGAGTGATTGAAAATCCA[CG]AACTTGGCTTGCAGCTTCATTTAGGAACCTGTACTGAGGAAGAAAAGCCGCTGGAAAAGA	0.651766	0.575627	0.594442	0.643851	0.675934	0.399456	0.510027	0.327444	0.445648	0.755588	0.566177	0.627182	0.662147	0.579801	0.748466	0.829007	0.812493	0.833908	0.823641	0.819731	0.818267	0.813343	0.785711	0.827318
cg19824055		ATCAACTGCACCCATTCCCTAGCCTCTCTCTGCCAAATTATCCTTACAAATCCTAGGCTC[CG]AGCTTTTGGGAGGCAGATTTGAGAAATGTCTCCTGTCCTGCATGGCTGGCTTAGCAATAA	0.418834	0.369145	0.394736	0.331793	0.395901	0.0879119	0.232339	0.191309	0.180239	0.194887	0.390726	0.417149	0.330555	0.378513	0.128646	0.593939	0.593489	0.566853	0.594575	0.598971	0.617472	0.526091	0.573349	0.62114
cg02323003		CAGAATCTCTCCTACCCTTTCCAATGCAAATGCCCACCAGTAAGTGGGAAGGAATTAGCA[CG]CCAGAGGACACATCCTGACTGACCTAGGATGGGATCTAGTAGATAAACATTGCCTTTGTT	0.533515	0.499888	0.63039	0.598894	0.509429	0.222054	0.238852	0.240871	0.327618	0.101884	0.576208	0.60534	0.625694	0.586837	0.209168	0.380124	0.409083	0.378464	0.406589	0.373831	0.395526	0.315988	0.297906	0.336503
cg12645075		CACTTGTAGGGTTGTTGCAGGGATTAAATGAGTTAATATTTGCAAAGCACTTAGAACAAT[CG]CTGGTACCTAGTAAACACTCAATAAATGTATAACCATCTCCTGAGTGTTGGTTGTGTGCC	0.651105	0.67684	0.707626	0.745097	0.740179	0.28313	0.436926	0.343723	0.502666	0.454328	0.722177	0.726763	0.774101	0.710738	0.501383	0.871363	0.845006	0.884614	0.886728	0.881323	0.891895	0.867826	0.868682	0.871638
cg01982837	SDK1	CAACAACAGTAGGGTTTTACTCTCCCTACTATCAATATATTGGCTGTGCTGGAGGTGAGG[CG]CCCCCCTTCCTCCTGCAGCCAGAGAGCTGCATCCCTGGGAAGAACCTGCTCTTACATGAC	0.716527	0.560373	0.722518	0.765154	0.643255	0.285597	0.377096	0.439014	0.516283	0.274753	0.622753	0.742607	0.81583	0.609301	0.292102	0.270723	0.264495	0.241595	0.22347	0.246068	0.18339	0.307595	0.377627	0.346533
cg24983752		AGTCTCTACTGGAAGTAGGAACTTGGCTGAGCATCTTTGCTGCTCTAAGCTCCAGGTCCT[CG]TCTCTAAAAGAGAAATAATGGCACCTATTTCACTAATTTATTGTGAGGATTGAATGAGGT	0.455404	0.542944	0.585384	0.490505	0.529891	0.247958	0.25921	0.126288	0.269263	0.295231	0.606517	0.584925	0.534125	0.617521	0.14535	0.821287	0.792417	0.816356	0.806555	0.783055	0.786869	0.783022	0.706517	0.785959
cg16466270		ATTGATTGACTTTTGAATATTGAATCAGCTTTGAATATTTGAAATAAACCCCATCTTAGT[CG]TGGTGTGTAATTCTTTATATATATTGTTAAATTCTATTAGTTAGGATTTTAAAGAATTTT	0.59877	0.519628	0.576522	0.620483	0.474987	0.214811	0.381766	0.299472	0.41913	0.377074	0.553972	0.63855	0.655463	0.55899	0.362441	0.8433	0.852058	0.847713	0.861088	0.844672	0.831622	0.805832	0.785951	0.808345
cg23741330	FAM26E	TTTAAAATTCTTCCTTAATCAGAAAACTGTTATTGGCTACAGCTTCATGGCTCTGCTGAC[CG]TGGGAAGTGAGCGTCTCTTTTCTGTTGTGGCTTTTAAGTGCCCCTGCAGCACTGAGAATA	0.442553	0.326734	0.461584	0.412821	0.318952	0.149944	0.123833	0.201203	0.12852	0.299176	0.300098	0.480835	0.415738	0.265486	0.516358	0.694244	0.733313	0.724278	0.725461	0.764284	0.685392	0.7294	0.635141	0.735406
cg26432088	HAVCR1	AGGTAAGGAGTTTGAGACCAACCTGGGCAACATAGCAAGACTCCCTCTCTGCAAAAAAAA[CG]AACAAAAAATATAGTCAGGCCTTGTGTACCTGACCGTAGTCCCAGCTACTCAGGAGGCTG	0.696768	0.626386	0.641906	0.604851	0.619557	0.27489	0.447878	0.407795	0.514382	0.324253	0.685793	0.696018	0.616688	0.625251	0.456857	0.805975	0.802477	0.798418	0.770364	0.798609	0.807535	0.819789	0.770895	0.811373
cg19159964	C17orf54	CTAACATCATGTTGCAGCAAGGTTCATTTCATTTCTTTTTATGGCTGAATAATATTCCCT[CG]TACAGATGGACAGCAGGTGTTGACCTATTCATCGGTTGTCTATTCGGCCTCCACAATCCA	0.652728	0.652768	0.727296	0.728066	0.681481	0.489377	0.433511	0.427756	0.580494	0.407851	0.699387	0.757489	0.756637	0.718168	0.33864	0.864166	0.849254	0.855998	0.853236	0.85713	0.850671	0.86208	0.834457	0.844402
cg06616178	LRRC30	TTGGCTCGCAGGTGGCTGCCTTCTCCCTGTGTCTTCACTTGGCCTGATTGCCAAACCCAG[CG]CCTTCTGAGATACTGGGGGTTACAATTTCAGCATACGAAATTTGAGGGCAGGGTGAGGGG	0.745516	0.701264	0.739361	0.718746	0.682792	0.399551	0.509726	0.376323	0.546233	0.366933	0.718409	0.766552	0.676717	0.72645	0.354156	0.826977	0.855229	0.780781	0.837919	0.874234	0.851334	0.829507	0.828557	0.824595
cg20694241	CNTNAP3	CAGTGAAAGTGGCGGGGCTGAGGAAGGGCATATTCAGTTAATCTAAAGGGAGGAAACAAA[CG]TTCCAGGTAGATTTAGAGGAAGACTTTGACCAGAGTAAGGTGGTTACCGGTTCCCACTGG	0.564442	0.418347	0.407469	0.518277	0.592605	0.261657	0.19313	0.216258	0.301205	0.380054	0.468315	0.473094	0.515171	0.580469	0.25992	0.866837	0.878036	0.838898	0.857109	0.85376	0.847207	0.863306	0.81555	0.845635
cg15697852	VTRNA1-2	GCTTTAGCTCAGCGGTTACTTCGAGTACATTGTAACCACCTCTCTGGGTGGTTCGAGACC[CG]CGGGTGCTTTCCAGCTCTTTTACTGCTGAAGTTCAGCTCCTTTTCCATGGGGAACCATGG	0.581686	0.428764	0.534304	0.483146	0.376372	0.105846	0.143037	0.133487	0.152562	0.123413	0.455388	0.509664	0.496333	0.40224	0.183984	0.844825	0.830711	0.835897	0.844385	0.83371	0.855311	0.831071	0.781551	0.863381
cg27325152	SIM2	GCCGGTTGCCGCTGGTGACAGTGGCTGCCCGGCCAGGCACCTCCGAGCAGCAGGTCTGAG[CG]TTTTTGGCGTCCCAAGCGTTCCGGGCCGCGTCTTCCAGAGCCTCTGCTCCCAGCGGGGTC	0.433306	0.274881	0.444969	0.400626	0.489262	0.163615	0.121265	0.13094	0.164494	0.551574	0.291136	0.499548	0.380296	0.424453	0.832376	0.0820987	0.0794911	0.094894	0.0827682	0.102269	0.089946	0.0881615	0.0882075	0.080359
cg14260643	CYP3A5	TCAGCTACTTCTCCTTGAACATCTCTTTTGATCTTCAAAACAGATAAGGGAAAAGGGGCC[CG]ATTAGCACCCCAAGTCCAAGGAAACAAAGAGAGGAGTTTGGACAGTTACTCACAGATAGA	0.311186	0.198599	0.318953	0.324015	0.258837	0.0922341	0.062528	0.0596465	0.0819183	0.0710332	0.223019	0.302683	0.323258	0.251899	0.0671122	0.465454	0.467445	0.47777	0.489241	0.496797	0.456726	0.490592	0.493319	0.522388
cg22669120	KCNA1	TCCCACCCCTTTCCCCCATCCTGTCCTAGAACTAGCAGTGAGGCAATCACCCTAGAAACT[CG]AGTTACACCCATTCTGGCTAACTCGATTAAAAGAAAGAACATGGATATCTTATTTTCCTA	0.571926	0.501664	0.589907	0.604418	0.589106	0.0994628	0.370368	0.289045	0.34288	0.307606	0.542531	0.605661	0.653753	0.568381	0.485167	0.806787	0.769502	0.772291	0.818643	0.804015	0.768828	0.822697	0.729515	0.804225
cg10866060		AACAACAGCCAGATTGTTTCTTCTTCACTTACTGTGCACGGTATGGGCTGGCACTACTGC[CG]CAGCTTAGAAATCTCAAATGCTGTCATGAAAAACAAACTAAGCCCTCCAGACAGAATAAA	0.715211	0.590253	0.643622	0.729235	0.643889	0.223304	0.276853	0.260517	0.147394	0.543293	0.591581	0.631479	0.736579	0.568788	0.566782	0.49658	0.538537	0.4915	0.537427	0.494021	0.510383	0.44857	0.426609	0.423376
cg12125173		TTACAAAGATAGGAAAAGACAAAGCCAGGCTTAGAACCCAGGCAATCTGACTTCAGCAAA[CG]TTCCTTTAATTATTTCACCCTACAGTCTACTGCAATTAGCTTAGCACACATGTGATAAGA	0.39885	0.446265	0.433993	0.449141	0.385194	0.155047	0.197769	0.229995	0.26347	0.223081	0.475527	0.457858	0.446922	0.439609	0.317431	0.742516	0.701716	0.694469	0.72725	0.719004	0.666204	0.739703	0.607082	0.791541
cg01329509		TAAACATTGAGTACATATAGACACAGAGAACGGAACAATAGATACTGGGGACTGCTTGAT[CG]TGGGAGGGTGAGGAGAGGGCATAGGTTGGAAGGCTATCTGTGGGTACTATGCTCACTATC	0.676076	0.607494	0.718373	0.737319	0.655727	0.222432	0.348958	0.432814	0.520418	0.204668	0.708155	0.770884	0.727281	0.71107	0.362172	0.905314	0.888564	0.849645	0.889386	0.882215	0.895188	0.897664	0.882945	0.878817
cg07645299		GACTTTCTTGATGAGGAATTTGTGCTGGTAAAGGGGCTTTCGTTTATTTAGGGGATGGAC[CG]AGAGGCTTCCTGAGGAGAAAATCTATTTTAAGGCAAGACCATGAAGGAGGAGTTTGGGCT	0.626005	0.466268	0.626731	0.549205	0.566742	0.280426	0.30173	0.178989	0.167159	0.182624	0.462664	0.617006	0.542867	0.497855	0.258289	0.299424	0.309853	0.31175	0.323058	0.328697	0.321279	0.326536	0.277894	0.267193
cg24932481		CCTGAGGGCAGTGGGGATGGGGGAGACTGCCAGGTGCTGAGCTCAGGACCCCGGGGAGGC[CG]GCTGGAGGTGTCAGGTCCTCCTGGCCACAAAAGCAGCAGCCCCAGGGGCCTTTTCCTCCT	0.541455	0.505749	0.539965	0.632877	0.512918	0.135666	0.347212	0.324953	0.173916	0.55525	0.507097	0.56906	0.652598	0.519156	0.673997	0.778355	0.778638	0.759026	0.739171	0.779529	0.763731	0.786916	0.730449	0.790236
cg16887183		GCTGTGGCAAAGCCTGCAGAGCACAGCTGGAAGGATGGGTTCAGCTGCCATGTCTTACAC[CG]GAGATGCTAGAGAAGTGACAGCCTCTTTCAGTGTCTTAGAGGCCCAAACAGAAAGACCCA	0.687974	0.669727	0.655045	0.668663	0.671736	0.495134	0.574674	0.437896	0.360004	0.550307	0.70433	0.676755	0.685128	0.662409	0.534452	0.82088	0.822564	0.822637	0.823586	0.805122	0.810336	0.795695	0.738812	0.787988
cg14310958	SEMA4G	CCCTGACCTTCCAAGTGACTTCCTTGGACTTTGACCCCTGTGACTGTGCTTCCCATTCCC[CG]CCCCCACAACCTGTGACTCTGGCTCCCTTTGGGGGTCTTGTTAGTCTGGGCCTCCCCAGG	0.599911	0.62369	0.633065	0.660039	0.614707	0.326564	0.482686	0.411626	0.39114	0.257317	0.632475	0.678901	0.673623	0.657777	0.553049	0.762069	0.757611	0.736628	0.73892	0.763483	0.723402	0.7526	0.716485	0.732426
cg24107619		ATAACAGCAGCTACCATTTACCGAGAATATATTATATGCCAGGCTCTGGTCTAAGCATTA[CG]TTCTTTATTCTTCAAAGCAACCTCATGAGGTGGGAGCTATCACAACCCTGTTTTAAAACT	0.638929	0.525079	0.666704	0.649578	0.634179	0.25835	0.391697	0.369185	0.474429	0.343427	0.566863	0.669386	0.66989	0.6067	0.356125	0.382677	0.369808	0.386251	0.394266	0.353957	0.346986	0.389651	0.232165	0.314717
cg12881901		CCTGTGGACTTGGCCATCTGCTTCTGCCTCCTAAATGACCCCGTCTTCTCCAGGAGTGGA[CG]GGAGCTGGCAGCAGGTGTCCTCATCCATGCAAAGCCATGGGCAGTTGTGCCCTGATACCT	0.584688	0.547565	0.545815	0.643752	0.593943	0.315431	0.374719	0.453452	0.367146	0.192744	0.570002	NA	0.67346	0.558753	0.194046	0.781197	0.754844	0.712395	0.763117	0.782401	0.761574	0.795016	0.73047	0.785405
cg07959609	EPHA2	TTTATCCTGGAGGCAATGGAAAGCCGCTGGAGGTCTGATGTGGAGAAGTCAGACCCCTGC[CG]TCAGGAAAAATCTGTGCCTGGAGGCAGCTTTTGTCCAAGACCCTGGGGACAACCTGGCCC	0.403929	0.265494	0.344185	0.458941	0.352629	0.1011	0.136771	0.192872	0.211259	0.104011	0.251431	0.336585	0.462951	0.290093	0.0745843	0.743989	0.798974	0.794295	0.78458	0.758472	0.759017	0.632328	0.655645	0.679602
cg06889971	LOC728723	CTTATGGGAGGTGGAGCATGCAGACGGACGGGTGCAGGAGCCAGGGTGCAAAAGCTGGGG[CG]CTGGGCTTCCAGCCCCACGGCAGTGTCCAGGGGCAGGATCCCGTGATTCCCGGAGCCCAA	0.525592	0.455005	0.490123	0.580125	0.410473	0.336394	0.313808	0.297662	0.181587	0.536766	0.436598	0.540443	0.589139	0.50606	0.58545	0.734297	0.707367	0.704529	0.725652	0.730053	0.702852	0.749337	0.741255	0.756281
cg15042801	TRIM77	TTTGCCCCTCTATCCAAGTCCTGGTAATTGTGACAATAATCAGGCTGTTTCTGCTGGGAT[CG]ACCCACACTTTTAGTGAGGAATTTCTGTCTGTATTTATTCCTTTCTTATCAAAGGTCATC	0.623117	0.536333	0.643999	0.627363	0.547825	0.244423	0.298194	0.276603	0.484241	0.206557	0.570833	0.617109	0.625676	0.578568	0.371065	0.795475	0.832815	0.822944	0.812989	0.850393	0.825744	0.829452	0.774972	0.837625
cg01254170	AGAP1	CTCTGGGGATACTGTTACTATTAGTGAGCATTATTTGCTGCAGAAATTGATTCCTTCTGC[CG]TACAGTAGGCCAGGGAGGCCTCCAGGTGCCTTCGGTGGGGGAAGGATTTTAGTTGCTCAG	0.589986	0.464499	0.567249	0.641876	0.528644	0.321242	0.224467	0.317525	0.359733	0.187261	0.533689	0.5564	0.630033	0.506199	0.360005	0.86716	0.858405	0.860558	0.894151	0.880259	0.85493	0.851873	0.798684	0.877017
cg13554018	SPIN1	ATAGAAGAGCCAGCCGTTTGTGTTCGCTTGGTAGGTGTAAGTAATAGCAGCCCTTAGCCA[CG]GAGTCTTTATGTGGTTTATTCCTGCAAGGTTGTTTTAAACTGAAATAGAACTGCTAGTGT	0.467494	0.257364	0.402671	0.466079	0.307072	0.114814	0.074899	0.150088	0.155775	0.196357	0.227751	0.382059	0.450137	0.20576	0.12029	0.802944	0.80845	0.842263	0.810141	0.817921	0.825599	0.835059	0.716459	0.838646
cg00868860	DCD	GAGAACCTAGTGGGAGGCAGGAGTGGGCTACAGAGACAGACTTGGGTGAACTGCCTCTGG[CG]AGGAGGGGAAGGGGAAATGAAGGCAGGGCCCAGTCTTCAGGGGACTATATGGTTGGGTGT	0.496204	0.517432	0.496726	0.622498	0.526105	0.212685	0.390752	0.26606	0.294175	0.18792	0.520607	0.511585	0.608109	0.54916	0.343544	0.801145	0.786918	0.82018	0.787978	0.776903	0.776242	0.746948	0.728567	0.787796
cg22924765		TCCATGGTTGGTGGTCTGTGTTCAGTGCTGATCACCAAGTGGAAACTCCTGGGAATCTCA[CG]GCTGGGGCTCCTCTCCCAGAGCTGCAGGGTCAGGGCTGGGCTCATTTTCATCAGCAGAGG	0.522701	0.504799	0.464391	0.476986	0.475948	0.313702	0.334666	0.142497	0.111377	0.297492	0.513327	0.489009	0.465138	0.476256	0.259343	0.754275	0.73151	0.773689	0.739068	0.740887	0.729355	0.721797	0.613296	0.714511
cg10803302	ZBTB41	GTTTGCATAAGTACACTCTATATTTGTGTGATGACAAAACTGCTTAACAATGCATTTCTC[CG]AACATAGCACTATCATTAAGCGGCGCATGACTGTACTTGGTTTGTATTTCAATCCCATAC	0.557389	0.366849	0.509892	0.470726	0.321801	0.219004	0.153636	0.115323	0.184441	0.158272	0.337452	0.500276	0.507664	0.373028	0.180414	0.873895	0.80921	0.880797	0.816037	0.894085	0.852902	0.865786	0.798785	0.865277
cg22001483		TGTGGCACCTGCTCAGCAGCCTGTGTATAGCTTATGCTTTCTCTACTGTCCCACAGGAAC[CG]TGTGCACCTCTGCAGGATGCAGACCCACAGGGGTGGGGACAGCAGGAAGAGCAAGAGAGG	0.550414	0.566005	0.57159	0.652597	0.50493	0.254259	0.330276	0.398975	0.16888	0.18928	0.57042	0.56897	0.61646	0.572156	0.234915	0.812123	0.826298	0.801866	0.80197	0.815828	0.803367	0.800207	0.762708	0.800552
cg17160327		CGATCAGCTTCTGAACAAAAAAGCTGACTCCCTAGCCAGGTGTTCAGCCCTCTTATGATA[CG]CTCCTAATTCATCTTTCATGCTGCATCTCCCTCTGCAGGCCTCCAAATAATTTATCCACA	0.733438	0.632139	0.720062	0.68967	0.66832	0.231126	0.519967	0.40781	0.376719	0.522729	0.669781	0.705564	0.703808	0.637108	0.370954	0.856271	0.873725	0.883076	0.858417	0.825535	0.846053	0.894972	0.848667	0.851568
cg13396068	DCD	AATGACCTCAGAAGGACCTTCCCTCCATTTCTTTATTCTTCCAAAAGCATGAATGAAGCA[CG]CATTATGCACCAGACATGGTGTTAGAGGCTAGAGATACAGCTGTGAGGAAGACAGACAGT	0.564619	0.524487	0.589312	0.652049	0.569426	0.309359	0.381093	0.339366	0.336003	0.270789	0.594202	0.594413	0.654728	0.593892	0.273836	0.828091	0.784357	0.800405	0.779939	0.821937	0.773111	0.8018	0.749441	0.781345
cg05301500	DOCK3	TTGCTAAGCCTTTTTTTTTTTCCTTGTTTACTTTTCCCTCAGCCTTAAATGTGGCAGCTG[CG]TTCTGTAGTTGCTACCTCTGTTATATCTTAGAGCTGTCTTCCATTTTCAGTTGTTTACCA	0.556387	0.521812	0.583888	0.645389	0.523654	0.156387	0.292911	0.195643	0.250811	0.265168	0.515275	0.600631	0.628507	0.512684	0.254799	0.773347	0.760558	0.778967	0.777279	0.789906	0.772212	0.789508	0.750361	0.787757
cg16156617	SLC17A4	TTCATTGGCTCAGCAGGTACATTGAGGAACTCCTCTGACATTTCTCTATGTCCCTCTAGA[CG]TCTGAGAGATGAAGAATGTGATAGAGAGAGCTGCCTTCTGACGGAGGGGACATTGATGTG	0.45881	0.440738	0.558684	0.54153	0.477872	0.154101	0.212427	0.29566	0.371162	0.107324	0.500597	0.532068	0.575339	0.535464	0.245679	0.847796	0.817884	0.825566	0.79476	0.775665	0.798491	0.777448	0.686537	0.793633
cg26980111		CAAAAGTAATTTTTCAGAATTTTCAGCTTTTTCTTATTGTAGGCATGGGAATAAGAACTT[CG]AAGCTCTTACATGTTGGAGCCAAAATTGGAATTCCCATGCATGGGGTTATGATAAATAGT	0.567356	0.519576	0.565275	0.669137	0.612785	0.229727	0.325807	0.350261	0.333753	0.274186	0.592	0.640969	0.679426	0.63483	0.238999	0.854943	0.861231	0.826968	0.855457	0.88244	0.87612	0.899904	0.805082	0.830619
cg02168186	FAM189A1	GCTGCAGAGAAGGGAAGGATGCTGAGCAGCAGGCTGAGGGGGTCCAGTAGGCCTCTGCCC[CG]GCTGCATGAGGAGAACACCCCAGAGACCGAGTCCACTGGGTGGCTGGTGGTCTTGGCCTC	0.722364	0.717896	0.692519	0.740088	0.733694	0.530393	0.638377	0.459226	0.453086	0.750304	0.720121	0.755096	0.739967	0.717859	0.776008	0.818411	0.799735	0.800301	0.795829	0.825421	0.803634	0.826343	0.795559	0.811181
cg11735242		CAATGGTGAAGATTTGGCAAGTCCAAAATCTGATGGAGGAGTCTGGCGGGATGGAGACTC[CG]AAAAGAGTTGCAGTTTGAGTCAAAAGGCAAGCTGTCAGTGAGCTAGGAAGAGCCGACGAT	0.5847	0.577818	0.607642	0.701814	0.671709	0.145329	0.309012	0.412761	0.245085	0.378879	0.613194	0.634514	0.680322	0.666863	0.23685	0.863462	0.873192	0.816047	0.882767	0.892286	0.886279	0.881924	0.823846	0.880158
cg20450198		TTAACTGCTGAAATAAGAGCCTCTATTCCCATTAGATAAATCTGTCCTTCTCTGAGCACT[CG]TGGATGAGCTATATATCTGTTCTCATCCTGCAGAGAGGTACCAACTACTGTGACAGGTGG	0.361214	0.420138	0.468953	0.48435	0.350887	0.291818	0.209849	0.175092	0.123897	0.0865948	0.469937	0.463794	0.506925	0.417022	0.104781	0.728253	0.733874	0.750775	0.742529	0.71918	0.694225	0.667378	0.636131	0.677621
cg12920361	LOC100128542	GTAAGAACTTCACCAAGTGCAGTTCCCTTGCCTGTGCAGAAGGTACCTTCTCCACCCATT[CG]AAGCCCTTCTATTTTGTCCTAGAGGGGAAACCATACATGGATTGTTCACACTGGAGGCGG	0.603902	0.549995	0.607995	0.598232	0.612956	0.237839	0.435076	0.314523	0.349615	0.233457	0.564482	0.632964	0.628133	0.598383	0.189133	0.7373	0.734835	0.749348	0.728816	0.732172	0.710003	0.708507	0.701194	0.747452
cg14580853	MAP7	TGCCCCTGTGGGTAGAGGGACTTTGCCTATTTGTTCACACTGAATCCCAGCCCTATAACA[CG]GCCTGGCACATAGAAGAGCTTCAAAAATGCTTGTTGACTCAAAGACAAAGCAAACCACTT	0.55945	0.570992	0.597266	0.652302	0.604601	0.40339	0.324528	0.375666	0.448041	0.406523	0.577803	0.652915	0.650691	0.642697	0.271879	0.755364	0.724243	0.771455	0.73976	0.738881	0.722173	0.750689	0.728831	0.768791
cg06535498	NOTCH4	CCCTTGCCAGGAAAGGTGAACTTGCAGAGCTTCCCAGAGAAGACACCTGGGGCAGGTGAG[CG]TGGGGTGACAGGAGATGATGCAGAAAAGGTGAAGCTCAGCCACCTGCCAGCTGTGTGACT	0.634084	0.603305	0.684357	0.637226	0.655475	0.392921	0.423045	0.330931	0.503804	0.402977	0.64443	0.697143	0.672921	0.651409	0.624974	0.79715	0.793404	0.820859	0.790025	0.783576	0.7856	0.806414	0.752808	0.794892
cg03057840		CCTCGTGATCCACCTGCCTTGGACTCTCAAAAGTGCTGGGATTACAGGTGTGAGCCACCA[CG]CCTGGCCTAAATTAGTAATTTTCAAGAGTTGTATTTCAATTTGATTTCAGGGTCGTTAGG	0.820629	0.815346	0.806349	0.880631	0.868571	0.518388	0.541187	0.721592	0.610447	0.478719	0.858962	0.852534	0.887508	0.866523	0.664751	0.762124	0.763183	0.80155	0.818774	0.750221	0.740584	0.697604	0.649859	0.598338
cg25504884		AATTATTAAAGGCTTTAGCATGCTATGTCTTGCCCAGGGTATTCATAAACTCTAATGTCA[CG]TGGAGTCAGCCTGTCCTCTGAGATTCAAGTGTTCAAATGAAATAATTGACTGCACCTCAA	0.636534	0.543825	0.655417	0.577806	0.515497	0.142757	0.359966	0.304905	0.241536	0.320499	0.608112	0.641086	0.575493	0.565531	0.165348	0.834139	0.832869	0.848161	0.822237	0.832107	0.789705	0.832355	0.79844	0.843449
cg22831953		TCCTTTAAAATTCTTTGTCTTCCTTTATCTCCCTGAAAGTGCACATAGTTTTCCATAGCA[CG]CATCTCCCCATTGCAATGCCTATTCCCAAATATAATTTTCTTTTAGAAAGTCTCCCTCTC	0.719121	0.627159	0.703588	0.682875	0.710477	0.462311	0.48738	0.421791	0.412117	0.724151	0.652818	0.703863	0.678385	0.656968	0.675699	0.861897	0.833777	0.858956	0.847405	0.836478	0.844721	0.854109	0.820731	0.855496
cg20863673		CAGTGGACACATTAGGAACAATTCCCGGCTGTCCCTGAAAGGCCCCTGGAAGGCTCCCTT[CG]GCAGCACCTGGAGAGGGAGGCTGACAGCAGCTTTGTGCATCTCAGAGTGGATACTGTTTC	0.527749	0.388909	0.516406	0.548672	0.566225	0.222634	0.221716	0.214193	0.197409	0.394481	0.409548	0.564594	0.522239	0.458986	0.572282	0.848086	0.844931	0.831367	0.819136	0.832328	0.81731	0.798564	0.760403	0.799335
cg12979789		TGTTCCTATGTGGATGAGGAAGCACATAGCCCAGGCAGCCATTGGCAGCCATGTTTCAGC[CG]TGAGGAGACACCTGCCTTAGAATGAATAGAAATCCTGGAAGGCAGAGAGAGTTGGAAATA	0.427546	0.493064	0.495554	0.559416	0.463661	0.271448	0.305579	0.194776	0.197913	0.188164	0.525986	0.520576	0.569514	0.463086	0.386253	0.747053	0.78258	0.784032	0.777853	0.779387	0.753708	0.768732	0.667485	0.775731
cg23971182		TATCCACCAGCTTGCTAAAAAAGGGATTTAAGGTGACTCATCCATCTTGTGTTTGTTTTC[CG]ATAGCCAATTGCCCTTGAATGTGAAGCTAAAAGGTCTGGGAAACAGTAAAGGATTTTGGA	0.43435	0.215575	0.30712	0.322543	0.263117	0.089213	0.0990165	0.0822777	0.156697	0.32849	0.206657	0.279591	0.237987	0.218424	0.260017	0.851038	0.818515	0.845434	0.830758	0.779948	0.797138	0.811288	0.625345	0.69748
cg22162312	KCNK12	CCACAAAGTGGATTTTTATTTCGCTTGAGCTATTCAGATTGACTTTCTACACAGCCTGAA[CG]GCTGCTGAATAATCACAGGCAAAATTTTCCACTGGTACCGCACTGTGTAGACACACGTGT	0.659935	0.616433	0.628168	0.647022	0.640726	0.307123	0.463354	0.38165	0.520981	0.371974	0.590475	NA	0.675483	0.650703	0.419902	0.836269	0.86131	0.887557	0.86039	0.864251	0.848741	0.908555	0.768666	0.846096
cg05740582	HPYR1	ATGGAAGCATGGATTATGGAAAGAGTATCAATTGAGGACATCAACTCAAGTCCTAGAGTG[CG]AGGCTTTGCTTCTGGAATGACAGTGAAGGGGCTGGCAGTTCTTTCACCAGTGGTGTACAA	0.706287	0.617115	0.631003	0.684119	0.618426	0.351784	0.414472	0.406736	0.435595	0.364599	0.66471	0.628541	0.703851	0.603943	0.294013	0.83806	0.828935	0.849973	0.822608	0.820434	0.816583	0.819478	0.800585	0.828921
cg06918793		AACCACACAACTCACTAATTGGGATTTGTAAGACTGGTTCTGGTTTTTCTTGGTCTGAAA[CG]TGGTATCCAGTCACCATCTGCCCCTTAACCCTGGCTGATCTTGCCAAAGTTCCCTGTCTC	0.525619	0.42236	0.497392	0.548377	0.351623	0.218276	0.183186	0.173012	0.334692	0.226816	0.323631	0.488196	0.506391	0.286067	0.251073	0.856684	0.861508	0.808978	0.77148	0.851442	0.836881	0.801819	0.800605	0.757331
cg22598247	PTPRN2	CCTTGGTTGGCATGGTGGGATAGAAGCCACTCTGAATGAGCTGGAGTCTGCACCTGTGGC[CG]GGGCAGAGGCAGTGGCTGAGGTAGATGGAGGATTGGGGAGAATGCAAACAGGAAGACAAA	0.648748	0.588007	0.655768	0.631275	0.522496	0.400827	0.483736	0.252559	0.380438	0.4667	0.617943	0.614562	0.652047	0.541283	0.4185	0.82717	0.832643	0.799617	0.838831	0.810709	0.83214	0.846178	0.810021	0.826107
cg12681771		GAATAGCTGGCCTTGGAAATGGCAGAGCTGACAGCTCAAATCTCTCAGCTGGAACTGGCC[CG]ACAGAAGAAAGAGAGTGAGGCTATGGAGTGGCAGCAGAAGGCCCAGATGGTACAGGAAGA	0.694704	0.646984	0.670907	0.684913	0.725637	0.44342	0.497361	0.532436	0.421015	0.593098	0.651464	0.682251	0.666671	0.693824	0.603078	0.852716	0.85903	0.860193	0.821603	0.836093	0.825084	0.793591	0.810383	0.833377
cg00681365	LPHN3	AGACAAGTAGTAGTTTGCCAAGCACAGAAATGGAAGAAGAAAGATACTATTCTGAGTAGA[CG]AAACAGCAACACAAGGGCCTAGTTCAGGATGATTGAAACATAGAAGTCCCAAGGATAATT	0.679909	0.655588	0.764384	0.707111	0.656628	0.328896	0.407793	0.383325	0.44336	0.312931	0.733022	0.732394	0.71805	0.670463	0.367786	0.870978	0.872953	0.867041	0.878058	0.863554	0.852518	0.862094	0.874566	0.869973
cg14674802		AGGTAGAGACAGCAGTCACTCAGGACTCTCACAAGAATAGTCTCTATTGTGCAGGGAACT[CG]GCTCAGGTACAAGGCACTCCCTGTCAGCCCCACTTTAATCTGAAGATCCCTCCATTCTCA	0.445188	0.475143	0.514616	0.575775	0.46974	0.19693	0.24117	0.268649	0.347766	0.126123	0.504892	0.53357	0.641532	0.481998	0.351758	0.751333	0.747434	0.759665	0.750361	0.781521	0.748691	0.782334	0.679999	0.781889
cg05239967	TSG1	AAATCCACTAAATCTCTTACTTTGTAAATTACCCATTCTTGGGTATGTCTTTATAAGCTG[CG]TGAAAATTGACTGATACAGTAAATTGATGCCAGTAGAGTGGGGTACTGCTGAAAATATAA	0.640569	0.581876	0.637102	0.689487	0.62744	0.347181	0.374303	0.431468	0.353229	0.298712	0.614112	0.676676	0.685566	0.607271	0.351634	0.781364	0.799058	0.80598	0.788022	0.794614	0.802309	0.789339	0.786035	0.779908
cg14491761	GLP2R	GGGTACTTTCTCCCTCTGGGTCACTCCATCCTGCTCTCTGCCATCCCAGAGAGATGACCA[CG]TCAATTCCAGAGGTGACACCACTCTGAGTCCATTTCTAGGGTCTTTGTTCTAGTTGAGCT	0.690413	0.680024	0.647965	0.628458	0.650821	0.282172	0.374602	0.434867	0.361566	0.634619	0.719567	0.670051	0.68313	0.66854	0.537771	0.820056	0.810219	0.729692	0.812137	0.808132	0.794694	0.782691	0.758682	0.813621
cg26372842	OR8S1	AGAGCTTTGTGTATATTGTACAAGTCATATAGCTAATTAATAGTACAGCTGGAATGTGAA[CG]TAGTCTGACACAGGAGTCCACTTAGCCATTGATCTGTGTGGCTCAATTATACTCTAAGCA	0.662876	0.627654	0.674081	0.714187	0.606357	0.413979	0.217848	0.192776	0.478374	0.633442	0.612173	0.630409	0.675511	0.645105	0.593406	0.836261	0.83374	0.797552	0.841834	0.829761	0.820065	0.859765	0.817047	0.818167
cg07531663	BEYLA	AATAATAACTCTCATACCTAGATCCAGAAAGTAGAAATAATTGACACTCATAGCCAGTCT[CG]TGGCCATGGGTAAAGTCCTCAGTTTTTCACTTGTATAAAGTTCATGAAGGGTTAAGAGTG	0.30164	0.317243	0.385091	0.358865	0.342406	0.149729	0.101647	0.17711	0.105859	0.084776	0.366465	0.369169	0.358336	0.355845	0.0797116	0.633212	0.668495	0.657857	0.650647	0.626409	0.65186	0.546394	0.472741	0.572512
cg11136592	AKR1C4	AAGAGTCCTAAGTATAATGCCTAAGCCATTTTCTTGAAGAGTACAACCTTCCTTCTGTAA[CG]TATGATGACAAGAGAAGACAGTACATCAACCTCAAAGCCTCTGATTCAAAAATTCAAGAA	0.69058	0.606002	0.649777	0.710326	0.695863	0.337193	0.401374	0.488952	0.485935	0.319688	0.64262	0.716894	0.739828	0.657895	0.694122	0.844408	0.824147	0.888978	0.847622	0.852223	0.814754	0.851239	0.821256	0.84949
cg19478111	PLEKHB1	GCCGCCTGGCCCTTGTTTACTAACCCTCCCTCAAACGTTTCCTGGGTGGCTCCCCAGGGA[CG]GCAGGGCTGGGGGCTTCTCTCCAGGGAGCTGCTGCTGAGGCCTGTGTCTCCCGTGGCTCC	0.445369	0.282409	0.327527	0.364183	0.229035	0.0650389	0.101272	0.129307	0.0845712	0.434447	0.28034	0.312509	0.34805	0.248641	0.45822	0.680373	0.687302	0.719475	0.70897	0.690411	0.674215	0.691208	0.617657	0.744898
cg01825137		AAAATGCCTGCATCACTGCAGTATGATTATGCCAACCACAAATCACTCTTCACTGGGCTT[CG]GAGAAACTATTAGTCATGAACATCCAAGAAAAATCCCTGTCCTTACCTTGCAGAGAATTT	0.637423	0.467327	0.476267	0.469222	0.440496	0.15521	0.29869	0.128758	0.233983	0.27645	0.357312	0.490016	0.494663	0.409548	0.319345	0.822754	0.816355	0.819025	0.803542	0.786153	0.793959	0.827072	0.786429	0.796494
cg14230803		CCAGTGGGTAAATAATGTGCACATTCCATGTCGATTTTGTGTATCCCTTCCTTCCCAAAA[CG]ACTGACAGCAGATCTCTGGTCCTTGTGTGAGCATCTTGATGCAAGGATGCAGCTTGTTTT	0.371208	0.299535	0.393803	0.461112	0.39109	0.101074	0.142875	0.120346	0.228926	0.0901065	0.353971	0.355483	0.476101	0.343278	0.109722	0.637088	0.611401	0.569373	0.597641	0.589101	0.581586	0.639415	0.583229	0.633992
cg07345016		GAGTTTTTATTGGGGTTTCATTACATGGACACAATTGCTTGAATGGGCTGCATCATTGGC[CG]TGAAGCTGAACCCCATCTCCATCCCCCTCTCCTCCATGGAGGTCGGGCTGATATCATGTG	0.60071	0.514225	0.586896	0.587002	0.425263	0.0989678	0.344818	0.204395	0.30595	0.354206	0.579996	0.585649	0.598941	0.506097	0.398856	0.839557	0.845681	0.858403	0.848771	0.847185	0.834763	0.838647	0.802698	0.863065
cg14417954	PRKCZ	TGGGCGGCGGTGGAGGGGCCTGGAGGGCGATTGTCCAGATCAAGCCCCTCGAGTAAGGCC[CG]AGAGGCTGTGGCTTCAGAAATGAAGGTCATGGGCGACTCGGGCCAATGCCGCGTCCTTGA	0.447685	0.348965	0.332709	0.31505	0.306832	0.0853137	0.140654	0.164788	0.114076	0.087561	0.279535	0.368134	0.291973	0.314993	0.0841415	0.18158	0.189246	0.165581	0.201675	0.200435	0.19176	0.135797	0.122656	0.138956
cg24792113	TMPRSS11E	CTTCAATTCAGCCCACAAAGTCATTGATAGAGCTGGATTCACACACTTGGATGTAGACCT[CG]ACCTTCACAGGACTCTTCATTGCTGGTTGGCAATGATGTATCGGTGAGTTAGTTCCCTTT	0.4897	0.463745	0.452793	0.457307	0.483515	0.134525	0.179944	0.142573	0.170386	0.224677	0.518547	0.441248	0.454835	0.472613	0.171792	0.744236	0.712544	0.689312	0.755646	0.724053	0.714042	0.739133	0.744299	0.601993
cg12056696		GAGTTCCAACAACTTAGATTTTTGAATTACTTATATTTACACCCATCAATACAGCTAAAT[CG]TGAGAGAAACTTGCTATTCCTCATCTCTACCCCACCCTCTTTCTAGCTGTGTGACTTTAA	0.587549	0.55166	0.584564	0.646636	0.538743	0.265273	0.250918	0.261209	0.493582	0.289923	0.550625	0.62201	0.701528	0.555997	0.537747	0.799133	0.772927	0.784214	0.763374	0.771731	0.733117	0.789585	0.740605	0.744702
cg23042540	DLGAP2	GTCAGCCTTGCTTGGAATTCTGGCAGGTTCCCCGGGGTGTTTCAGTGGACAGGAGGCCCC[CG]TGCCGTGGCTGAGTCAGCCTGGGTACCCCAGTCACCAGCAGGGCCACCCTTGATGACAGG	0.519075	0.406933	0.431178	0.428842	0.308526	0.152685	0.198341	0.251532	0.183787	0.125681	0.463467	0.480433	0.423198	0.409179	0.177406	0.718009	0.722127	0.73528	0.734534	0.757753	0.695827	0.691954	0.705729	0.719706
cg01526177		AATGAGATGGTAGAAGACCAGCTGGGAGGTGAAGTCTCAGTAGGCTAGGGGCTTAATGTT[CG]ATGCAACACCAGACTTCTGAGACTCAGGAGGTGGGTGTGGATCTGTCTGCCCAGTGCCTC	0.520474	0.542354	0.499836	0.551297	0.563172	0.228572	0.336752	0.307351	0.441323	0.395296	0.567024	0.507237	0.558467	0.584248	0.438071	0.760062	0.715288	0.78208	0.747965	0.748186	0.744815	0.761274	0.66033	0.779851
cg11357369		ACAAATTTGTTTCTCAAAGGCCCCTCCGCTGGCTCCTCCGGCCTCACGAGTCCCGTTCCC[CG]TGTGCTTCTGTCCTTGCCCAGCAGACACCAGCCCCGCGCAGGCCAAACTGGCTCCGTTCC	0.545709	0.486628	0.599303	0.688966	0.547173	0.366855	0.308076	0.297069	0.270167	0.211138	0.528535	0.640772	0.694212	0.464711	0.266288	0.891813	0.894221	0.867525	0.903568	0.900032	0.873933	0.871049	0.841271	0.892007
cg25724842	PACRG	AGGTAATATATTTGAAAATACAAAAAATGGTGAATTTTGTCATTGATTCCTGTGTAGTCA[CG]TGAATTCTTGGAGTTTCTAAAAGGGGATTTTTTTTACATTGGTTTACATCCCATTTCACG	0.561291	0.430034	0.511933	0.57302	0.395011	0.126293	0.198988	0.194099	0.232577	0.115941	0.5025	0.511491	0.588983	0.480999	0.13936	0.824532	0.826153	0.821959	0.869037	0.813173	0.808106	0.836306	0.767185	0.815861
cg11346522	KCNK2	AGAAATTATTATCGATGCAATTTAGATAAGGTAAGATAAAAAATAAAAGCCTATATGGAA[CG]CAGCCAACGATTCATCTGTTTGCATTAATAGGTTCCAGCAATGGTTCTACAGGCACGGAA	0.627256	0.646764	0.552041	0.646529	0.546788	0.413615	0.260867	0.342228	0.408143	0.37716	0.639503	0.605818	0.621287	0.641243	0.55677	0.772004	0.842364	0.735985	0.807999	0.829727	0.834643	0.80294	0.783114	0.830024
cg01597400	PTPRN2	TGGGGTGGGCTGGGGGTCAGCTGGCCTCAACGGGGTGAACACAGCAGCTCTCCCAGACAT[CG]AAGGAGATTCAAGGAGCCTGAAACTCAAACAAGTGGAAGAGGCTGGAACGTCACCTAAGG	0.687969	0.682097	0.734325	0.698837	0.659312	0.506199	0.488385	0.255782	0.24526	0.444694	0.675767	0.721394	0.676388	0.712928	0.568749	0.795798	0.789166	0.778291	0.804294	0.821292	0.801595	0.79978	0.796972	0.814272
cg17170463		ATTCTGGATGCCCAGAGCTTCCATGAGGGCCAATAGTCACGCAGGACTGAATAAAGGCCA[CG]ATTAGCACTATGATTTCATGCACTCAGGTATAAGCAGGCTCAGACCACATCAGGGGACAA	0.555537	0.329694	0.456024	0.569904	0.455742	0.199138	0.237949	0.224009	0.285396	0.189726	0.337455	0.449075	0.434809	0.349363	0.331786	0.865884	0.889869	0.842005	0.862506	0.840207	0.864111	0.846706	0.813908	0.866128
cg26697929	SDK2	GGGAGAGATGCGCGCGAGCCCCTCCGCTCTCTGCCCAGCCTTTCCTTCCAGCCTCGCTCG[CG]CCCCTGTCTCAAAGGCCTCATAGGACTCCCAGAGTCTCCTATAGTCGGGAGCCCCCAGCC	0.389258	0.277297	0.444297	0.378072	0.466693	0.0976776	0.100684	0.206246	0.126533	0.324389	0.325086	0.447414	0.378938	0.361808	0.497694	0.0798294	0.0985025	0.0865771	0.0905678	0.0976932	0.0989847	0.110965	0.128207	0.0900214
cg26553513	LRRC4C	GGATCCTGGCAACCACTGTAAGGTCAGTTGCACACTCCCTATTTTACATGTATTGGTGCT[CG]AACTGTTAAAGTGCTTAGCCAGATTGTTATTCATTCTCAGGAAATTAATACACGTTAATC	0.453669	0.498194	0.490409	0.514843	0.371227	0.197964	0.231671	0.222522	0.155835	0.0876182	0.510367	0.473782	0.501943	0.448138	0.103424	0.574357	0.594314	0.663501	0.626057	0.585295	0.604932	0.686058	0.676532	0.685916
cg12840245	PCDH7	ATAATTTGGGAACACAGGGTTATAAGTTGAGCCAGAAGCTAGACATAGTCAGTGTTTTAA[CG]TAGCAACCCTATTAGATCCTAGGAGGATTCATTCAAGTTTTATATATTTATTTTTATTTT	0.720969	0.695949	0.739209	0.776331	0.723091	0.34851	0.535542	0.413364	0.361639	0.279736	0.826745	0.792955	0.833439	0.777491	0.184393	0.873136	0.876176	0.851299	0.848482	0.854035	0.858999	0.845135	0.856648	0.843713
cg18675043	SH3PXD2A	GGATGGCGCTCGCCGGAACCCGGCCCCTACCCAGCGCTGGGAGCCCGCTCTCCCCGCCAC[CG]GAGCGGTTCACCTCCCAATTCTTTGCATGGCTTGCCCTAGCGATGCAAAGAATTGGGAGG	0.482484	0.343652	0.60239	0.669121	0.526961	0.16488	0.145971	0.164273	0.116114	0.0816916	0.428974	0.591567	0.676802	0.42151	0.116196	0.053502	0.0644232	0.0618474	0.0511037	0.0564117	0.0601473	0.0601593	0.0764742	0.04862
cg09833249	PAH	AGAATATTATCTACTTATTTGCATGCACACTCTGTCTTAGACACTGTGCCACGCTCTCCA[CG]TGCATGGTTTCACTTCTTCCTCTTAACAATCCCATGAACTATGCACTCCCTTTTAATAGG	0.503825	0.475449	0.4872	0.501745	0.490782	0.285209	0.217432	0.227904	0.270732	0.32651	0.510038	0.511484	0.542958	0.501879	0.137197	0.793035	0.786288	0.76818	0.749444	0.742904	0.738951	0.769728	0.620711	0.757511
cg00928596	MIR365-1	TGAGACCTATTTAGCCAATTATTGAGAAGATGAGGTCCCTTTCGTGAGTCTGCACGGAGC[CG]CCGTACACCATGAAAGCGCTCACTTGTTTAAAGTTTGCTCTAACTTTGTACATTTTTTCC	0.472619	0.31811	0.377301	0.628159	0.55599	0.0890245	0.151137	0.150735	0.0638419	0.931566	0.364373	NA	0.648009	0.416409	0.945346	0.958313	0.934712	0.950794	0.944642	0.933426	0.926989	0.9426	0.930158	0.956329
cg21079713		AAAAGCACCATGCACTAAGCAGAGAAAGGTCTAGGGAGGCTCAAATAGAAAAAGAGACAC[CG]CAGGACTAGACCTAGGCTGAGCTTTCCCAGCCCCAGCCTCAGGAAGGGACAAAAGAAGTG	0.616046	0.578207	0.655531	0.621675	0.592376	0.317866	0.504997	0.44439	0.314363	0.366484	0.614761	0.636139	0.64011	0.591557	0.373397	0.779067	0.768322	0.807119	0.785625	0.781668	0.7846	0.774487	0.718357	0.762763
cg26689186	BBS9	GAAGCATTTGTGGTTAGTGAGTCAAAAAGCACCACCGTTTAGCTGCACTTGGTGTAGTTG[CG]ATTAGTGCCTTTCTGTTCTGAGAGACATGTATGGCACTCTTTCATAAGATCTTGTTACAT	0.768459	0.66776	0.733479	0.720836	0.726259	0.545422	0.398471	0.609498	0.531122	0.597307	0.640371	0.688064	0.726837	0.659259	0.595632	0.883961	0.865356	0.866575	0.84575	0.85388	0.852526	0.878538	0.851354	0.869826
cg14331765		TCAACAACTCGACCTTCTTCAGCTGCATGAAAATAATTCCAGATTTGAAAAGGGCTTTGG[CG]AGATTCATTGTTGGGGCGGGGTGGGGGAGCTGTGACTTTGCCAAACCATCTTTTGTCATT	0.488218	0.292455	0.479799	0.469043	0.488102	0.148339	0.228133	0.142207	0.279658	0.176882	0.321121	0.447856	0.467586	0.400133	0.12332	0.118969	0.10822	0.138052	0.085057	0.122645	0.119735	0.0627711	0.144727	0.11924
cg20666307		GCAAAATGTGACAACTTCTATATCTGAGGGTTGTGGTAAGGACCGAATGGGATAAAATTT[CG]AGTCCTTAGCATAAGGCATGACACACAAATATTTCTATAAGGCCTTATTAAGCATGTGGA	0.600043	0.538137	0.61763	0.612255	0.43714	0.204772	0.385412	0.347206	0.349581	0.250712	0.522212	0.627807	0.609667	0.54696	0.140437	0.872255	0.845767	0.864147	0.838025	0.878512	0.843559	0.873102	0.830095	0.849224
cg07012128	DLGAP2	GTACGCACATGTGTCATCATTCTGATACCCCATAAATAACATGTTTACATGCACATGTAA[CG]TGGTGCCAAATTCTCCCTTATCTGATGCTCCCTGCCCCCCTCCTCAGGCCACTCCCCACA	0.446719	0.510242	0.605372	0.589322	0.513042	0.245512	0.337836	0.188259	0.357328	0.125611	0.597945	0.654808	0.638884	0.521808	0.23068	0.817172	0.8355	0.85577	0.828869	0.860154	0.817482	0.81263	0.751093	0.823336
cg10919889	NRXN1	CAACAACTTGTGTGGTTTCTCGTCTCTCTCAGAGTAAAAGCCAAAATCCTGAGGATAGCC[CG]TAACTCTATACAATCTGGTCCACCATTTCATCTGTGGGCTCATCTTCAATACTACCCTAA	0.642904	0.581218	0.609517	0.655939	0.636626	0.399925	0.43156	0.227728	0.48103	0.114423	0.585081	0.676668	0.678633	0.636732	0.277578	0.750916	0.780684	0.745601	0.765073	0.776032	0.772013	0.765193	0.734309	0.793007
cg01958086	MEIS2	AGAAGGCCCCGGCAAGATTCTGGGGACTCAGTCACTCCAGGCTGTGGGGTCTGGAGTGGT[CG]GGCTGTGAGAGCGAAAGAGGCTAGTTCTTCGGGGCTTTGACTCCAGGGGCAGAAGAGCAG	0.326847	0.237993	0.38596	0.404167	0.42436	0.148523	0.121926	0.174755	0.0784439	0.464348	0.220268	0.412204	0.387767	0.343459	0.457145	0.0765395	0.0681053	0.0717294	0.0736327	0.0672178	0.067827	0.0749364	0.0785455	0.0721852
cg18891864	MAPK4	CTATTTAGCAGCCCACAAGAAAGGTGGAGTGGCTGGAATTGAGGCTTGCCACGTTGACAT[CG]TACCTGGCCCCTAAGCTGACAGCATATTGGGAAGACCACTGAAAAAGAGACACACACACG	0.704016	0.63234	0.71365	0.759889	0.693234	0.426865	0.483131	0.482163	0.599033	0.305772	0.675804	0.742212	0.761712	0.673549	0.632456	0.885263	0.878588	0.887671	0.884478	0.883212	0.877918	0.888093	0.870499	0.868555
cg25815298		AGTGTCTTTAATCCATGTCAGAACCATGGCTGACCTTTGATGAGTGATACATTTCACCAC[CG]TGAGCCGGTACAAGAAAAGAGGATAATGACAGAGAACTGTTCTGGGTATTCTCAGAATCA	0.581388	0.369298	0.478318	0.487108	0.370957	0.175077	0.207561	0.210027	0.283395	0.169772	0.322289	0.485683	0.469091	0.288067	0.155537	0.851714	0.888502	0.873365	0.867488	0.871987	0.862496	0.8571	0.754916	0.874689
cg21211413	ACAN	TTGGAGAGATGCTGGAATTCCACAGGTTACCTTGAGCTGTGTTTAATTTAGATATTCTTA[CG]TGTAGTTTCTAGTGCTGTGCCTGGTATTTTCATTCATTCTCCAATATCTGCTGAGCGCCA	0.425569	0.378111	0.472245	0.463877	0.535959	0.178409	0.213679	0.267199	0.311534	0.290418	0.439628	0.509635	0.493655	0.443925	0.455571	0.675656	0.67164	0.664804	0.696386	0.669243	0.654605	0.655109	0.716844	0.75115
cg16370778	ARPP-21	GGTTAAAATTGAAGTGAGTAATCTTCGGTGCATAATGCAATTGTTAATTTTAGCTCCTTG[CG]TGGGTGCCGTTCTGACTTGAACAGCCGGCTGTAGCCTTCATTAGAGAAGAAGCAGGCAGC	0.561643	0.584906	0.573327	0.659377	0.491037	0.150719	0.151436	0.203166	0.199088	0.627665	0.534137	0.559536	0.655193	0.569498	0.810086	0.819267	0.83937	0.855943	0.845121	0.815941	0.84529	0.807907	0.781907	0.829927
cg25137110	POU6F2	CAACTTGCTATCTTTTCAGCATTCCTGTTTTAAATGCCCAAACCATACCATTTGGGTCAC[CG]GGCTGACAGATTTGAATTTATTTTGCTTCCAGGGAGCCTCTGAACACTGGCAGGGACTTA	0.55305	0.302145	0.508689	0.531128	0.36094	0.139746	0.173745	0.14191	0.176235	0.538016	0.31091	0.533308	0.523871	0.304322	0.571921	0.86588	0.863891	0.861175	0.857833	0.861508	0.855463	0.873471	0.866909	0.857359
cg01797450		ACTCCTGTCCCTGAATTCCCTCCGTGGATTCCCCACCCCGTCTCTCAGTGTTTGGACAAG[CG]TGGGTTTTCTGACCAAACATTCTAAACAATGGCCTAAATTCATCCCTGAGAGGCTGGCAT	0.467287	0.300704	0.420834	0.547363	0.361827	0.0918922	0.125407	0.217114	0.22058	0.0902468	0.292193	0.447242	0.535241	0.288437	0.0829784	0.860003	0.8783	0.879707	0.86195	0.845814	0.840387	0.858054	0.733051	0.843538
cg12612410		AAGTGCCAGAACTGAGCCCTGCTCAGAGCAGTTAAATAACCTGGCTGAGATTGAAGCCCA[CG]CCTGCTAGGCCCCCAAAAACTGTGCTTTTTCTGCAGCCATGAGGACTTTTAAAGAGAGAG	0.3623	0.440623	0.437762	0.564432	0.388297	0.26803	0.256766	0.18202	0.205959	0.114675	0.481627	0.496834	0.572547	0.40614	0.225763	0.751853	0.725891	0.736256	0.754722	0.743386	0.728114	0.770001	0.697171	0.768279
cg06354527		CTCATCTGTACAATACAGTCAATAACATTACCATTGTCATTTTGTGTAGCTCTGGGATGT[CG]TGCCTGGCCTGTGACAAGTCAGTACATAGTATTTATCGTTAAATGGCAGCTGCGCACACC	0.742941	0.69278	0.752522	0.690796	0.718106	0.517973	0.577911	0.401869	0.506064	0.441992	0.758212	0.739475	0.654375	0.731626	0.50374	0.850416	0.857978	0.863069	0.851819	0.851332	0.842431	0.855793	0.816853	0.854118
cg05115791		AACAGTGTTTCCCCAAACTTGCCTCATCGTATGAATCACACAGGCATCCATTAAACATTC[CG]ATTCAATACTTCTGGGATGGGGTGTGGGAATATGCATGTTTAATAAGCACCTGGAGTGAT	0.574933	0.445741	0.390375	0.455059	0.440718	0.318156	0.140408	0.163052	0.190547	0.242565	0.346189	0.340958	0.314696	0.411578	0.24578	0.705298	0.661948	0.679596	0.705043	0.68797	0.728581	0.781631	0.689269	0.754099
cg08507952		TCTGCCCTTTACATAAGACCCTGCCTGACCCAGCCTCGAAGGAAAACCCATCCCCCCACC[CG]TGCTGGTGTTTGGAGCTCAGAAGTAGCCCTCCCAGTGACCCCCTGCCAGGCCTCTGGTGA	0.564455	0.48135	0.609988	0.615043	0.49097	0.330064	0.254383	0.237412	0.378636	0.222963	0.532408	0.591791	0.634857	0.507339	0.097972	0.334193	0.345219	0.358319	0.377264	0.315639	0.325218	0.334147	0.26545	0.303025
cg08858345		ACACCTGCAAAGCTCCATGAGGACAGAGTCCATGGCTGTTTTATTCAGCCTCACAACTAG[CG]TAGTGCCTAGCATGTAGTAAGCACTCAGGAAATATTTGTTGAATGACTGAATGAGTGGAT	0.672645	0.609096	0.699851	0.715004	0.632172	0.370807	0.453933	0.478822	0.512438	0.351552	0.647678	0.710188	0.715476	0.633522	0.204449	0.834567	0.843178	0.857095	0.827645	0.833842	0.819739	0.826935	0.835625	0.836438
cg17959486	LOC441204	AGAACTCCTGGGCTCAAGTGATCCTCCTGCCTCAGCCTCTTGAGTAGCTGGGATTACAGA[CG]TGCATCACCATTCCTGGCTAGAGTATAGAGCTTATAAAGTCTATAGTAATGTGCAGTAAT	0.770362	0.77705	0.777724	0.78394	0.799948	0.450339	0.596664	0.625297	0.628672	0.464621	0.797277	0.765262	0.807616	0.798276	0.424364	0.856669	0.852856	0.844551	0.829257	0.882635	0.872652	0.861046	0.833639	0.87189
cg23662331		CTGAAGTGCTGTCCACGCGGTGTTCAGATGGGGCTCTGGAGGCCATGCCATGTGATCCCT[CG]GTGAGGAAAGGATTCCCTGGCCAGCCATGGGGAATATGAACTCCTGAAGATGAACAAGAG	0.521105	0.358422	0.37114	0.290649	0.492886	0.117718	0.134401	0.153353	0.137354	0.0911507	0.337475	0.40682	0.273783	0.381248	0.101544	0.830981	0.801171	0.851714	0.821988	0.805882	0.803951	0.782721	0.737913	0.787278
cg02381426		TGAGAGTTAGTTACATTACCCCAAGTTTCAAAACAAGGAGACAGACTTGGACAGGTCATT[CG]TTTAATAAGCAACAGAAACTGGAAACTGAATGCTGGTTCATCTATTTTCAAAGTTTGTGC	0.555766	0.531814	0.615932	0.650517	0.54635	0.294907	0.385561	0.419483	0.306992	0.265804	0.629692	0.638474	0.690257	0.561115	0.443989	0.767997	0.776671	0.802181	0.801879	0.797213	0.779625	0.828382	0.749418	0.822548
cg08330217		GGATGTTTTTTTCAGGGCTCCTAGGCTAGTGCTCGGGTGAGAACACAAGTTGTTTAGATT[CG]GGGGCATTATGGTGCTCAAAGTTGACTTTAAATGAATGATAGAGTGACAGTAGCTTGCTG	0.559456	0.50411	0.647554	0.609765	0.583486	0.322525	0.394427	0.28678	0.400892	0.226219	0.576472	0.680839	0.665566	0.558233	0.400828	0.821197	0.832101	0.815608	0.804684	0.802739	0.806863	0.80606	0.761484	0.821851
cg03008093		CTTCGTTGCATGAGGAAAGTCACTACTGTCAATGCAGGGCTGCTGGTCTCCACCTCGGAA[CG]TGGCAGTGCACAATCCATCACTGCCCTGTGTTCGCAGGTCACAGAGAAAAGAAATGCTTT	0.563206	0.534671	0.606052	0.687517	0.578974	0.464708	0.248709	0.252403	0.222796	0.253383	0.549631	0.631512	0.71649	0.543268	0.218382	0.864236	0.850797	0.859277	0.853776	0.862546	0.832168	0.853214	0.789137	0.833531
cg05288381		AATCGACTCACTATACAGGGAATAATAGAAACTGGGCCTCCACCACTTATCCCATATGTG[CG]TGGACTTGAGCCAGATTATAGATCTGTGAATTGCAAAACTATAAAGTTAATGCTAAAAAA	0.569372	0.57948	0.608477	0.626413	0.648147	0.435045	0.420511	0.372866	0.299089	0.314039	0.619841	0.609224	0.567176	0.610522	0.463118	0.59226	0.652989	0.655549	0.588177	0.59888	0.550073	0.462946	0.493496	0.473646
cg02844593	CACNA2D3	TCCCCTTTTTCATTGTTATTTGCAGCATGTAATCTGCTGGACTTGCAACATTATTTCCCA[CG]AAGCACTTCTTTCTTTTTTTTCTTTACATCCCAAGAGATCTGTGTCTTGCATTAAACTTT	0.637109	0.583339	0.563271	0.654295	0.533204	0.246428	0.162501	0.218841	0.470976	0.322133	0.554792	0.639244	0.627135	0.563445	0.173305	0.819832	0.80067	0.820745	0.82281	0.814348	0.820431	0.857181	0.767553	0.818708
cg11010344	SMR3B	TTTTTGCTCATTATATATATTTTTTTAGTCAATACTATCCCTGCTTTCATTGAGAGCCTA[CG]TATTCAGAAAGCAAAAGAGAAACTTTTTTTCTTTGATAATAGACTTTCAGACTATGTGAC	0.741448	0.72609	0.727838	0.78032	0.685865	0.395213	0.575673	0.59954	0.518752	0.460614	0.777651	0.77089	0.72846	0.73902	0.63581	0.862404	0.872406	0.808468	0.837122	0.8671	0.852177	0.86767	0.853521	0.89802
cg02013739		TGGCATTTAGTACTCCATCTTGCTACATTCTAGGCGAGAAATTTTTAGTTATTTAAGCCA[CG]TTCCTGAAAGTCTACTCTAGCCTTATGTGGTTTGAACTCACTGTTAACTCTGCATAGCTA	0.622287	0.488661	0.570263	0.611978	0.59155	0.22336	0.225598	0.239553	0.207953	0.423284	0.537312	0.636095	0.641914	0.502486	0.800512	0.823021	0.758291	0.84116	0.741321	0.79572	0.768122	0.801585	0.754316	0.79991
cg27598979	SMAD9	TAAATACCATGCCTTAACCTCAAAGTCTTCTTTCTACACTGGCCCAGATACCTCTGCACC[CG]GCTATGTGTTGGGTTTGAGATTGTCCTGGGTGAGAAACACCAGGAAACAGCGGGACCGGT	0.633718	0.577546	0.590295	0.497355	0.47789	0.333098	0.335629	0.284969	0.384625	0.563819	0.570937	0.562285	0.495373	0.529385	0.612576	0.801497	0.78717	0.820693	0.796072	0.807581	0.816036	0.810483	0.779663	0.813137
cg11611282		TCCTCGCAAACACATGCAATGATGTGCAAACAGCACCTGGAGCAGCTCAGATTCCAACAA[CG]AGGGGCTGGTGGGAAAATCTGTAGCCCACAGGGCCACGGAATGCTACGGAGTTTACAAAA	0.479573	0.431352	0.493319	0.56865	0.425356	0.133391	0.334739	0.186837	0.277224	0.338531	0.430661	0.519054	0.568958	0.390957	0.153407	0.739387	0.720143	0.728824	0.737534	0.735155	0.704481	0.735731	0.670444	0.731154
cg24890976		AAATAATTTAATTGTACATTTTAAAATAACTAAAAGAGTATAATTGCATTGTTTGTAACA[CG]AAGGATGAATGCTTCAGTGGATGTATGCTCTATTTACTCTGATGGGATTATTACACATTG	0.555512	0.552311	0.64939	0.666309	0.53942	0.278604	0.404393	0.373609	0.389192	0.369039	0.631001	0.643532	0.639359	0.600294	0.453617	0.844844	0.822477	0.792405	0.831608	0.826647	0.840703	0.823515	0.79792	0.844458
cg02479986	PPFIA4	AAGAGGAATTTGCTGAGACAGGGAGAGGTCTGTGTGTGAAGGAAAGGGGTGGTCTGGGAA[CG]GGGAGGAGGAACATGGCCACCTCTGCTCAGAATATGGGAGTGTCAGCCCAGAGAATGAGG	0.412062	0.376564	0.318868	0.458794	0.433408	0.188511	0.159479	0.162971	0.209063	0.250337	0.382682	0.354634	0.460422	0.396456	0.42977	0.700814	0.676724	0.677698	0.679795	0.692964	0.676124	0.702132	0.585597	0.688161
cg04681554	EVX1	CCCAGTGTTTCAACTGCTCGGGGAATGCTTCAATTGCTCGGGGAAGACACTTTCCCCAGG[CG]AGGGCAAGATCAAACGCCGATCCGGGCAGTTTGTGGCTGGCAGGGTGTAAGAGGCATGGA	0.449845	0.4921	0.529067	0.392544	0.28151	0.138681	0.142169	0.235908	0.193865	0.121925	0.49251	0.54122	0.424773	0.418923	0.0818198	0.0812126	0.080555	0.0730967	0.0850105	0.0780081	0.0798305	0.0757252	0.0764975	0.074995
cg16978398		CCCCACAGGCCACCCAAGCTCCCAGGCTACCATTTGGAGATCGTTGCTTCGGAGGAATCC[CG]GGTCAGGCTGCTGGAATCTGGACTCACACTTCCGAAACCTCAGTGTTCTGATCGATGCTT	0.576077	0.366107	0.452037	0.436016	0.347606	0.239107	0.0977707	0.0669727	0.0707343	0.084369	0.336723	0.429993	0.424279	0.345477	0.0666848	0.795925	0.78745	0.812207	0.786745	0.79576	0.775538	0.832136	0.744716	0.774359
cg01310118	SMOC2	TTCAGAACTGAAAATAGCCCCTCGTAACTTCACAGCACGAAACCCAGAGCTCTCAGGACA[CG]TGCCCCCAACTCATCTCCCCATCCTGGGTAGGGCCAGACTGCGGCTCTGACAGGTTCTGC	0.585019	0.542917	0.571806	0.583823	0.565025	0.253081	0.238257	0.156698	0.219794	0.26181	0.598201	0.619262	0.591286	0.562504	0.28014	0.731646	0.699645	0.703285	0.74422	0.716191	0.698212	0.719756	0.672499	0.778996
cg20123317		TCTTCTATTTGAAAGGGTTATAACATTATTGCCAGAAAGCAGTCATGATGTGGTTGTCCT[CG]GGCACACACACACGAACTTGGTCTAAACCTCCCCAAAGACATCGTTGGGTAATTATATCA	0.508766	0.47339	0.519977	0.602143	0.426078	0.251426	0.259301	0.222288	0.115243	0.22107	0.492586	0.533386	0.592475	0.476258	0.132638	0.825678	0.82696	0.843308	0.807836	0.837543	0.859629	0.840685	0.727659	0.872365
cg24863544		AACTAAAATTTATTTTCTCATGGTTCTGGAGGCTGCAAGTTTGAGATCAGGATGCTAGCA[CG]GTTGGTTTCTGGTGAGGGCTCCCTTCCTGGCTTGTAAATAGCCACCTTCTGGCCACGTCT	0.441329	0.382114	0.36965	0.497444	0.450971	0.151548	0.212483	0.212824	0.157124	0.409937	0.351645	0.412001	0.454423	0.354152	0.724208	0.689919	0.671544	0.698514	0.655844	0.693907	0.70111	0.62905	0.638201	0.608642
cg25117725		TCCAATTGTTGATGAAATTATCTCAACATATAAAAGAAAAATTGATCCATTTGCCTAAAT[CG]TTCAAATGATTCGTTAGTTCACTGGTTCAGTTTGCCTGGTGTGTTCTGGGCTAAAATTTA	0.634497	0.63763	0.70441	0.699099	0.653976	0.380319	0.433097	0.486453	0.498724	0.357666	0.651455	0.723091	0.694448	0.696159	0.399345	0.846406	0.861541	0.851105	0.817009	0.835331	0.823837	0.821779	0.780749	0.840766
cg15706017	C6orf10	CTGCTTTGGCTTCTCAAAGTGCTGGGATTACAGGTGTAAGCCACCATGCCTGGCCTGGTA[CG]AAATATTTAAGATACAGTTGTTACCAAGTACTGAAATATAGGTATATCTCTTGTGTTGAT	0.671242	0.722707	0.737255	0.751093	0.711928	0.451081	0.52212	0.552778	0.526381	0.390035	0.769892	0.791453	0.771329	0.748698	0.618351	0.882702	0.862238	0.876242	0.857087	0.833658	0.849222	0.866516	0.827115	0.840797
cg02757516	GPR123	CAGTGCAGGCATGGTTGTAGGTTGTGTGTGAATCTGGTCCCTGGCCCCAGAGCTCTGCCT[CG]GGGCCTCCTGTGGGTGAGAAACCACACAGAACCTGGCGTGAGCCTTTGGCCAACAGAAGT	0.565269	0.527525	0.558832	0.650891	0.496547	0.332952	0.410361	0.37466	0.278837	0.20571	0.587771	0.585404	0.658883	0.563088	0.423016	0.813771	0.819741	0.812903	0.812455	0.810341	0.800317	0.797346	0.750867	0.803721
cg12906963		CCTGGGCTTTTCAATCCAGGCCAGTAATTGTCCCTCTTTGTTTGGAAAATGCACAGGGAT[CG]AATATCCATCAGTCTAAGGCAGTATATAGGGGAAAGAGGAGGAAGGAGCAGGGCAGAAGT	0.516854	0.329703	0.424216	0.491998	0.296154	0.0671395	0.0907273	0.0782354	0.213196	0.0834786	0.36937	0.436291	0.508887	0.350806	0.0714931	0.776365	0.774098	0.812427	0.787182	0.799455	0.779099	0.788749	0.734927	0.811659
cg02766941		GGTGTGATTTGGAGTTGTCAGGTAGGGACTGTGGAGCTCAGAGACGCTGGTGTCTGGGGG[CG]TTGGGTGTGAGTCTCTGGAACCTGCCTGGGCTTCCCGGGAGTCCTGTCGTCTCCACATGG	0.704213	0.70177	0.745555	0.756762	0.681181	0.530375	0.504327	0.309594	0.317684	0.410429	0.728564	0.742842	0.760567	0.705764	0.479364	0.840526	0.874015	0.861023	0.848331	0.864738	0.844693	0.850276	0.828277	0.872026
cg00028929	KRT5	TTTGGGATTGGGGTGGGGATTCTGTTTTGATGATTTAGATTTGGGAAAACTTTGGGTTCT[CG]TGTCAGCAGGGGCCATGCTGTGGGAAACCTGAAGGCTGATTTGAAGCAGAATATAGAACT	0.604871	0.609212	0.600022	0.656258	0.569412	0.309142	0.490789	0.352906	0.315327	0.240326	0.639668	0.62727	0.683935	0.62904	0.689322	0.741188	0.754709	0.740812	0.769569	0.732301	0.706534	0.746283	0.71275	0.752579
cg18395809	PTPRN2	TGGCCGGCAGCCTCTGAGACGGCCCAGGGCCTCCGTCCTCCTGGAATTCTCTTTCCTGAG[CG]CCACTGGACCTGGTGACTCCACTCCGATGCCTGGAGGACAGCAAAGGCAGCAGAGATGGC	0.616757	0.561406	0.581897	0.643261	0.536353	0.41931	0.42297	0.318636	0.357941	0.371687	0.588593	0.607236	0.664711	0.569064	0.368005	0.730364	0.806548	0.600672	0.78197	0.707277	0.762727	0.798697	0.729147	0.799461
cg01603862		CTGTGAGGATTAAATCTGCCGGCACCTTGTCTGTAAAAACTGTACAAAAATGTTCAGAAG[CG]TCTGCTGAGCATTGGGTTGGCGAAGGACATGGGGGAGGCCAGTGTTTCGCGGCCTCAGTG	0.660813	0.586133	0.679061	0.630211	0.535525	0.394534	0.339271	0.482354	0.415392	0.310584	0.635055	0.673747	0.642596	0.623259	0.359823	0.876846	0.885548	0.846149	0.847335	0.847796	0.859963	0.847936	0.816774	0.837434
cg22521539		AGCTTTCAGAGAAACTACTTTGTGATCTTTGCTTTCATGTCACAGAGTTACAACTTTCTG[CG]GAGTCAGCAATTTGAAAACACTGTTTTTTTCCATTCTGCAAATGAACATTTTGGAGCTCA	0.624046	0.625986	0.58845	0.666087	0.546329	0.377157	0.410196	0.320744	0.518132	0.643433	0.569159	0.610601	0.673461	0.597609	0.637954	0.833297	0.834304	0.858338	0.819999	0.8429	0.823461	0.795124	0.779299	0.7654
cg21607236	GABRR2	CTCTGAGAGATGAGTGCTGCTCAGGGTGGTCCAGTAGCTGCTGCATTGTTTGGTGAGGGG[CG]TGTGGTCAACAAGTCCGTCTGTCAATGACTGGCCAGGCCCCCTCGATGTCTATGCCCTCT	0.62173	0.61588	0.618966	0.659477	0.631563	0.398835	0.444738	0.316452	0.520026	0.388393	0.638803	0.644492	0.674344	0.634553	0.481521	0.738084	0.729926	0.739427	0.755702	0.773841	0.735724	0.735513	0.697509	0.745589
cg14128411	MYT1L	TATTGGAGGTATTGCTGTTCATTTCTGACTCAGTCCTGGCCCGGTAGGCTGCATCCTCAG[CG]ATTTTGCCGAGGTTTAACAATGACTTGGCCACCAGTTCATCGTAATTGTCATATTCGTCA	0.720529	0.652598	0.750871	0.716497	0.758881	0.349831	0.23948	0.598878	0.409565	0.422186	0.709221	0.786911	0.775109	0.754475	0.416759	0.842587	0.876887	0.883712	0.86587	0.874411	0.873058	0.873161	0.870907	0.879194
cg13302785	DOCK3	ATCTAATTAAGTGAGAGGGGACACAAACCATAAAGCCATTTTTAGGTATTCAGGGATGCA[CG]AAAGTTCCCTCTCATGACCCCTTCTTAAGAAGGGACTTGCGGATGTGCTTCTGCAAAGTA	0.589214	0.524132	0.59421	0.657285	0.589808	0.0861997	0.34453	0.257758	0.13157	0.342727	0.490529	0.68038	0.706865	0.504918	0.360364	0.83144	0.783059	0.748949	0.797586	0.805813	0.790912	0.869157	0.753625	0.852232
cg07798774	SCAND3	TAGGACAGGAGTTAAAACGCATCCCTTTGGTTTCTGTTTCTGGGAATAACAATGAAAGCA[CG]TTAAAGAAATATCTCCTAAACCGTGATGACTGAAAAAAATTGTAAATGAGTTCCAGTGTG	0.642852	0.548161	0.605668	0.643728	0.583487	0.383226	0.514697	0.326421	0.388994	0.510207	0.597346	0.612731	0.632194	0.625769	0.542101	0.803314	0.766384	0.745009	0.746656	0.784512	0.762534	0.792812	0.740048	0.810622
cg21944491	LTBP4	AATGTTAGGCGGAGCGGGAGGTGGGCCGGGCCTTCGGACGCCCTGTCCCGCAGACGTTGA[CG]AGTGCAGCGAGGAGGACCTTTGCCAGAGCGGCATCTGTACCAACACCGACGGCTCCTTCG	0.349753	0.318405	0.431839	0.482743	0.324162	0.0964111	0.110216	0.0976784	0.101512	0.0552882	0.365982	0.466737	0.482533	0.222183	0.0790616	0.0605464	0.050064	0.048769	0.0607017	0.0591022	0.062946	0.0474704	0.14773	0.0428665
cg24338843	C1orf158	GGCATTGGGGTCTCTGTGCTCTACAAAGGATAGTTACATTCAAGCAATCATCAATATTCA[CG]CATTTTGCATGGTTTCTATGACTGTTTCATACATGATGGTTATCGAAAAGACCACTGACA	0.653666	0.601685	0.690468	0.707919	0.637095	0.305218	0.355948	0.507702	0.492714	0.441569	0.685138	0.732851	0.710239	0.669961	0.395763	0.847407	0.836475	0.820873	0.853598	0.864544	0.830989	0.863646	0.801111	0.832665
cg03491087	LTBP2	GAGAAAGTGATTCTCTTTTTGGTGATCCTTCTAACCTAATGATGTCAGTGAAAAAGGCCA[CG]TCCTCCCCTCAACACACGCTAGTCCCCCTTCCAATAGAGGGAACTTGCCACAGAGTTGAG	0.466237	0.517817	0.480192	0.618254	0.582776	0.243829	0.376981	0.317133	0.378669	0.310752	0.524953	0.465214	0.597157	0.506733	0.578147	0.804534	0.765823	0.716017	0.784713	0.817114	0.771527	0.771682	0.758062	0.811645
cg16063925		GAATGCCCATCAGGCACTGGGACCCTCCTCTGCATCCCCGGCGTTTGCCTAAACCCCAGA[CG]AGCAGGGCCAGCTGCTGTTCCAGCATCTGTGCTAGAGCTTGGCTCACACTGTTCCACTGC	0.489534	0.505934	0.491098	0.571139	0.642122	0.204249	0.358385	0.312524	0.295213	0.258825	0.5092	0.494817	0.563758	0.548414	0.21611	0.861712	0.851485	0.844541	0.833786	0.821799	0.818689	0.811157	0.75984	0.78996
cg11035304		AATGGAGCTGCATTTTGACTGCACTCTTTCTAGGTTGGAGAAGCAGGGAAAGTGATACTC[CG]GGAGCTGGTGTGTCTAAGGCCTCTGTGAGTCTGCATGGTCAACACAGCTGGCTCTGCCTT	0.512812	0.408247	0.438331	0.453394	0.356929	0.317196	0.141888	0.106519	0.0780299	0.0706461	0.396098	0.426316	0.45202	0.370283	0.104388	0.700361	0.693813	0.700494	0.680402	0.686396	0.690006	0.667989	0.620736	0.674814
cg00633768	GPR133	AAGCCCACAGCTGCGACTTTCTGTTCTGGCTAATGGCACAGCCCTAAGTGTTGCTAGCAA[CG]TGGTTTTTCCAGCGCGTTTGGTGGAATTGCACACGTGTTGAGTTCATGGAGCTCTGCAGA	0.562513	0.610832	0.637088	0.660865	0.633407	0.268679	0.338118	0.395791	0.419847	0.395867	0.647323	0.67326	0.665398	0.628409	0.405117	0.805162	0.834778	0.835132	0.832042	0.840061	0.810584	0.814293	0.744423	0.811214
cg13405678	CACNA1B	CACAAAACAGGCACAACTCTTGATGGTTGCACAAAAGCTGCTGGCTGAGGACTCTGTCCA[CG]GCCTTGACTGGGGCTGAGAGCGAGGGGCTGCAGAGGAGGAGGCTCTCCACTGCGTCTGCC	0.529613	0.497256	0.509406	0.493734	0.474623	0.159419	0.219052	0.296043	0.13433	0.289139	0.525856	0.519166	0.489044	0.489116	0.449306	0.736545	0.732186	0.737876	0.741807	0.759464	0.741595	0.764036	0.626367	0.686185
cg08632095		GGAATATTATTCAGCTAGGAAAAGGAAGAAAATTCTGCCACATGCAACAACATGGATGAA[CG]TTAAAAACATCATGCTAAGTGAAACAGGCCAGTCACAAAAGGACAAATAATATAGGATGC	0.668947	0.634911	0.63668	0.691082	0.671419	0.346584	0.511314	0.395708	0.444709	0.626956	0.656596	0.670288	0.731881	0.647293	0.38407	0.808669	0.811484	0.791586	0.804866	0.781906	0.767179	0.796713	0.746526	0.806415
cg15462970	ADARB2	TATTCTGCACACACACGTGGGGAGCCTGCCACGTGCCCACTCTGCTTTGCCTGGTGGGGT[CG]GGGGAGAATAGAACAGAGGGAGTTTCACTGAGAAAAAATGCTGTGTGGAATTGGTGCGTG	0.682165	0.614436	0.725196	0.725117	0.689989	0.36942	0.46883	0.36513	0.456041	0.373493	0.640374	0.751791	0.743413	0.725767	0.547086	0.894649	0.896033	0.924408	0.884609	0.877015	0.893699	0.904598	0.835181	0.883006
cg11354857	KRTAP21-1	GCCCACCATTAACAACTAACCCTTCTATGATATAAAGTAGCACAAAAATAAATTTTGTCC[CG]TTTCCATACACGCATTTCACACTACTCATTCAAAATTCTCAATTACCCACTTATTACAAG	0.747999	0.757771	0.719825	0.773633	0.732942	0.42182	0.631859	0.49383	0.525461	0.484991	0.758812	0.73835	0.790301	0.732184	0.46714	0.848349	0.844941	0.911522	0.896343	0.890842	0.867538	0.879747	0.847643	0.827179
cg16885557		CAATAAAATAATAGGACTAAGGAGTGGGAGGATGCTTATCAAGTGTAAATAGTGTGCATA[CG]TGGCCAGGAACCCTACAGCTAAGGAGTCAGGCTGGACCAAGGGTGAGGTGGGGTCTGCTG	0.537915	0.394486	0.449761	0.441412	0.458054	0.257155	0.219088	0.194644	0.284009	0.202485	0.391237	0.478814	0.445108	0.457406	0.168282	0.742291	0.754599	0.766837	0.750344	0.752339	0.717608	0.746649	0.631743	0.757368
cg05226607	SPINK5L2	CTGGAAACTGCAGTTTCCATTCTCTGGGGTCAGAAATGTTGCTACAAGGAAAGTCCATCC[CG]AGGGAGGATTTGCTCTCTGACTTTTCCCTTTCTGTGTCTGGATTAAAATAGCTGTGGGAC	0.709072	0.624969	0.704819	0.682614	0.669117	0.389556	0.32653	0.349304	0.483738	0.499742	0.600029	0.70812	0.681694	0.648873	0.55818	0.804371	0.809087	0.801355	0.825588	0.830084	0.779953	0.847372	0.792333	0.821995
cg06473181	HOXD12	CCCGGCACCCCTGGGGGCGCTGAGGCAAGGAACTCTGCTAGCCAGCTGCCTCCGAACGCC[CG]CTGTTCCCCGGCCAGGTGGTTCTGGCTCTTCTGCCTTTCCACACCCAGTCGGGGGAGTTC	0.242404	0.428861	0.275987	0.38482	0.37535	0.0860833	0.127131	0.0954783	0.164405	0.284234	0.387464	0.292423	0.373787	0.39067	0.0950524	0.0477793	0.0590751	0.0500942	0.0575461	0.0652424	0.0610894	0.061428	0.0687133	0.0492485
cg21538190	NHLH1	GAGCGCCGGCGCCGGCGCCGCGCCACAGCCAAGTACCGCACGGCCCACGCCACGCGAGAA[CG]CATCCGCGTGGAAGCCTTCAACCTGGCCTTCGCCGAGCTGCGCAAGCTGCTGCCTACGCT	0.730217	0.753933	0.812723	0.753338	0.774305	0.562286	0.507894	0.413875	0.589243	0.902729	0.726018	0.799984	0.726366	0.739019	0.890472	0.895929	0.838409	0.879197	0.871411	0.913696	0.872284	0.902971	0.869084	0.924542
cg03700230		CAGGGGAGAGACTTGAACTGGAGCCACAACTTTGCCACCTGTAGCCAATGACTTGGCACA[CG]AAAGCTCTCACAGGGTGGGGAGCCTGCAGCTGCTCCCACAACAGAAGATCAATGGAAAGA	0.441111	0.550642	0.631434	0.608411	0.480204	0.362404	0.233373	0.109456	0.13707	0.108594	0.665627	0.662053	0.584751	0.502336	0.166728	0.825946	0.849531	0.796126	0.840503	0.849233	0.805913	0.827627	0.820527	0.86559
cg16905434		AACATCAGTCTGGGCCAGACAGTGAACTTATAATGTTATCTCTTCCAAGTGAATGCAAAC[CG]TGTCTGAGCCTCCCCTCTGATGGGGATTGGAAAGAATGCCTTTCTCCCAGGCCAGTGACC	0.532321	0.370539	0.427351	0.576288	0.36744	0.109495	0.0982348	0.231504	0.161541	0.0789178	0.379242	0.458023	0.589178	0.37356	0.09433	0.799204	0.771908	0.806853	0.809709	NA	0.792214	0.788163	0.779103	0.843129
cg10729854		AGTCAGAAGTGTGCAAAATGTTGGGCAGTGAGAAAAAAGAATGTGGTCATTCAGGAACTT[CG]TCACAATTGGGAAGGAGATTCACTGAAAATATTTTGTGATTTGAGCTTAATTTTAAGGAA	0.596223	0.523926	0.613173	0.683946	0.589531	0.337978	0.415341	0.388002	0.403345	0.100632	0.53924	0.62922	0.706478	0.509383	0.146695	0.814921	0.824571	0.839045	0.787412	0.827745	0.812383	0.818092	0.789703	0.830165
cg13660443	FLJ46321	CTGACCAGAGGAGTAATGCTGAGAGTCTCTGAGCAGAGGCTGGAGCTATAGGCCTGTCTC[CG]TGACACTTGTCCCATGAGGGAGCACAGATGTGACTGTTGACCTCTGAGTCTTTGCCCTCC	0.734066	0.70277	0.761987	0.722691	0.72111	0.415189	0.563243	0.499942	0.632209	0.357881	0.751409	0.776807	0.771237	0.731763	0.671572	0.829641	0.830115	0.847623	0.821091	0.831652	0.822708	0.844191	0.803725	0.847157
cg02500075		ATTGACCATTAAAATATAAAAAGTCTGATTGCCTGCAGATGTGCCAACCTGAGACCAGAC[CG]CCACAAAGACTTACTGATACTTGTCTCCTCCCCCATCTTCCTTCCAGCAGTGGAACCAGA	0.611698	0.354377	0.519952	0.521871	0.569612	0.314235	0.157937	0.204113	0.162587	0.156414	0.35827	0.53278	0.541973	0.542855	0.190254	0.857879	0.867266	0.856258	0.869676	0.866805	0.866748	0.886844	0.833272	0.892273
cg24116380		ACGTCAACCTGTTCTACCCATTGCAGACAAGGGCTCTGATTGGAAACCCTCTGACTCCTC[CG]TGCTTCTTGGCCTTTGACAAGTTTATCACAGATGGGAGAAGGACATTCTGTTTCTTCAGT	0.535902	0.408275	0.486411	0.46316	0.312821	0.102299	0.0866306	0.0632518	0.0849515	0.0775798	0.371865	0.452538	0.392594	0.339313	0.078183	0.82935	0.80161	0.823285	0.806475	0.821463	0.789401	0.794683	0.71198	0.783268
cg12659494	SIM2	CTCCTCTCGGGCGCAGCGGTCCTTCAGCCCAGGGCAGGTTCCTCCCTTTCCTACTCGGAA[CG]TGGCAAAGATACCCCAGTCCCAGCCCCTCCAGCTGAGAGCTGTTGCCCAAGGTCGTCGCT	0.424366	0.303847	0.417839	0.332757	0.526039	0.186112	0.210432	0.146347	0.162908	0.561525	0.296597	0.443545	0.333591	0.435536	0.771092	0.0941727	0.0953351	0.082749	0.0984668	0.091085	0.0893588	0.0891809	0.0986895	0.0873007
cg11804721	SLC27A3	TCGAATCTGAGAACTTCCACACCTGAGGCACCTGAGAGAGGAACTCTGTGGGGTGGGGGC[CG]TTGCAGGTGTACTGGGCTGTCAGGGATCTTTTCTATACCAGAACTGCGGTCACTATTTTG	0.6045	0.540214	0.555023	0.61938	0.601974	0.361554	0.380472	0.327552	0.461108	0.397867	0.551837	0.587068	0.634556	0.564793	0.407098	0.730341	0.729598	0.742198	0.744482	0.745766	0.72719	0.741958	0.695666	0.749513
cg11566441	DIXDC1	CATTGTGTTTGGCAAGGGTGTGAGAGCTGTGGGCTGTGACCTCAGGCAGCTTTGTTCTCC[CG]GGACACTTTGAATAACTGCAGATGGCTGGTTTAGAGCAAATGAATGTTCTAACCACAGTC	0.550753	0.324173	0.432508	0.358988	0.332279	0.0996089	0.0718463	0.0870166	0.0712396	0.0570055	0.217367	0.402349	0.3133	0.252232	0.0576541	0.823765	0.797744	0.808357	0.790825	0.763612	0.784004	0.782241	0.697435	0.798839
cg06961323	HTR3B	CTGTGAAGCTATATGGAAAACAATGATTTGTTTGTGACTTGGCTCCTATGATTGCAAATA[CG]TATACATATAGCATCAGACTGTGGGGCTTTTTACACATAGCTGAAAATATGCTCTGAAAT	0.665213	0.545538	0.682096	0.665358	0.661062	0.324651	0.361006	0.412954	0.42629	0.247357	0.628527	0.67685	0.676545	0.657673	0.57044	0.862579	0.851637	0.848708	0.844034	0.857619	0.843765	0.860811	0.822363	0.871278
cg03346987		TTCTGTTTCCATCCTTTTACTTTCTATTTTCTGTTACTAATTCATTTCATTCAGTTTTTA[CG]TCTGTGAATATCCTCTCTAATGCCTTAACTACCAAAATTTTCTCTCTCTTTTTTGTTTTT	0.622067	0.520376	0.592821	0.634992	0.445339	0.138227	0.329759	0.294837	0.227067	0.179398	0.612584	0.655077	0.672578	0.560372	0.287558	0.885053	0.883461	0.844395	0.856351	0.862262	0.828056	0.849268	0.827398	0.86408
cg02809611	OR1F1	GCTGAGTCTGTGCAGCCCAGCTCCTGATTCATGAGATACTCAGCCTCAAAGCTCCAGTGA[CG]AGTCACCCTCCCTCAGACCAATAACCTCTGGCCAGGTCTGAAAAAGGGAAGCCAACCCAG	0.535559	0.417468	0.431396	0.454539	0.430668	0.357804	0.26537	0.184053	0.178661	0.1225	0.415015	0.456015	0.458792	0.419659	0.175957	0.692064	0.696268	0.699896	0.691457	0.684209	0.698252	0.659502	0.612661	0.628638
cg25242561		GCTAGGATAGAGTTTTAACTCCTGGTCATCTAAAAAATGTATTATTTAGTTGTCTTTGTT[CG]TAGGTGGCTCTCCTGTTAGAATTTGTAATTCTGAGATAAAGGCCACCACCATCTGGTAGT	0.58562	0.539223	0.632475	0.65568	0.511421	0.280718	0.386217	0.354075	0.299442	0.22426	0.570203	0.652048	0.681693	0.5756	0.210224	0.823572	0.805309	0.753771	0.780598	0.809254	0.822142	0.801266	0.79139	0.810165
cg05580560		GAGAGAAGTGATACTGTAAGAGTGACTGACTGTTTCCCTTTCTCTTTATTTTAATATTCT[CG]GGAAAAAGGTCTGCCCCTGTGGAAGTTAGATAGATTTCAGATCATTATAACAAATAACTC	0.646352	0.626708	0.639643	0.655303	0.541484	0.410392	0.461597	0.261509	0.447474	0.463209	0.645365	0.635996	0.665612	0.571535	0.378982	0.818108	0.830803	0.84743	0.832774	0.817913	0.809266	0.802302	0.770999	0.824894
cg16836311	MAN1C1	ACGGCGGCCCGGGGCAATAGCATCCCGGCCTCCAGGCCCGGGGACGAGGGCGTCCCTTTC[CG]CTTTGACTTCAACGCATTCCGGAGCCGTCTCCGCCACCCGGTCCTGGGAACGAGGGCCGA	0.280518	0.518966	0.449789	0.366419	0.333255	0.150528	0.144571	0.16403	0.104841	0.0943387	0.492916	0.461297	0.360808	0.392199	0.095319	0.0384364	0.0546305	0.0492003	0.0500652	0.0658887	0.0602615	0.0448744	0.0707558	0.0516134
cg07581070		ATTTTAAAAATGAGAATGATCCATGTGTTAATGGGTGATTAAAAAGTAATGGAAGAAAAC[CG]AATTTATTGACTAAAGCATCCTCTCTGAAGGTACTAACTCTGCTGTCCCACACTCCCACG	0.609108	0.507051	0.619316	0.628896	0.518907	0.209767	0.254524	0.163768	0.433782	0.208838	0.603131	0.681011	0.622501	0.604774	0.374292	0.792326	0.810938	0.829915	0.801699	0.791119	0.780752	0.865082	0.776614	0.797489
cg00890049		TCTTGGTACTGCCAAAGCCAATTGTCTCAAGGCTCTGAACTTCAACTGCACACTTCCCCT[CG]CCAAATTTTGTTAAGTCCTGGGTATTAAGGCATCTACCTTGTAGTTGGGCAATAGTTCTC	0.519722	0.60765	0.642473	0.638692	0.507305	0.438983	0.337287	0.250687	0.349595	0.166674	0.655544	0.597484	0.613786	0.590214	0.194131	0.866884	0.843151	0.834944	0.831701	0.863358	0.801004	0.843311	0.790447	0.835339
cg14683643		ATGTCTTTACTAAATCCCGGTTCTACCTGACAGAAGGAACTAACTTGTCCATGTATTTCA[CG]GCCCCAGTTTTGGGAGATTCTTCCTTGACTGTGATGTTGCATGGCTAAATCCAAAGCAAT	0.664369	0.626382	0.691129	0.666162	0.69232	0.28558	0.419909	0.370547	0.511315	0.313496	0.663627	0.710316	0.683693	0.660591	0.562886	0.80353	0.827545	0.796776	0.799092	0.818481	0.805517	0.812568	0.761241	0.832228
cg09450097		CATAGAAAGCTTTTAGGGTTCTGGATGATACAGAGCACAGAAACATTTTGACATTTATTT[CG]GAGATAGTAGGAACTAGTGATGCTTTCCCAGTGATTGGTTATATGCATAGGCAAAACTTG	0.663991	0.68173	0.711192	0.675888	0.729709	0.37018	0.427811	0.448607	0.356361	0.241416	0.736788	0.755638	0.731742	0.701621	0.270949	0.819071	0.822494	0.847744	0.810514	0.839745	0.802529	0.831386	0.782469	0.815031
cg00955544	KRTAP13-1	TTTGTTCTACAGAAAATCATGTGGACAAAACCATTGTCATGTGTAGAGATGATCAAAGAC[CG]ACTATGCAACCAAAAAATGTAGAAAAAGATTATAGATGAGGATGATGATAAAGGTATATT	0.66198	0.679508	0.664175	0.687991	0.740844	0.374198	0.503178	0.529799	0.343941	0.454204	0.728501	0.745873	0.690046	0.691784	0.439171	0.816831	0.797995	0.82384	0.803882	0.794165	0.827475	0.839849	0.810802	0.795645
cg23862011	AAA1	TTCTTGAAGGGGGATCTGAGCAGCATATCTCTATGTCTGCCTCATTTCCCTATGTACAAG[CG]TGTACCTGATTGCAGCAGAATGAGATGAGAAACAAATATTTTTTTGTTACAATTTACCAC	0.623925	0.602974	0.657909	0.648405	0.525936	0.320195	0.409414	0.461466	0.449254	0.57114	0.651828	0.615773	0.642557	0.622801	0.412277	0.838893	0.837851	0.857448	0.840814	0.825265	0.82563	0.804996	0.783608	0.822387
cg18399935	GRM7	CATATTTAAAAAAAATCATCACAGAGTTGGGATGGCTGGAAGTAGAGAGGTTATATAATA[CG]GTGACCAATGGATAAATCTCCTCTGACCACTGTCTTATGGGCAATAAGTAAGGTATATTA	0.678335	0.609103	0.664579	0.732119	0.677693	0.349978	0.477311	0.512166	0.38401	0.369082	0.700289	0.674821	0.722882	0.66399	0.408544	0.839194	0.860495	0.798374	0.848862	0.882805	0.811458	0.832203	0.81947	0.837915
cg19113920	DNAH9	GCTGGGGCCAGAACTCCAGTCCCCCGGTGCCTCCTGCTCCACTCCACACACCACTCCACA[CG]ACTTATCTGCACCATTGAAGGATGATTCCCTGCTGTAAGTGATCAGGGTGAAACTGGGAA	0.499332	0.400396	0.541317	0.367699	0.378842	0.164612	0.208771	0.111295	0.164621	0.122595	0.537999	0.532802	0.365619	0.476058	0.131509	0.692619	0.68356	0.688801	0.755618	0.729372	0.678478	0.722428	0.700361	0.71084
cg07403610		AGACACATGGTAGATGCTCAATAAGTATATTTCAGATTTAATGAATGGATTCAGAATGCT[CG]AAAGAGGAAGGTTAATAAATAAGTAGACTTCTAATTTATTAGCTTATGGTGAGAGCTATG	0.558413	0.521179	0.636065	0.658171	0.508967	0.395059	0.347021	0.226387	0.266399	0.152837	0.598137	0.668575	0.644158	0.57361	0.183553	0.826758	0.837487	0.827959	0.834416	0.843412	0.802965	0.857075	0.786341	0.849102
cg27301649	COL29A1	GTTCACAAGGGTGGATGGCAGAGGACCACTGTTGCACGACAGCAAGACAGAAGGCTGGTG[CG]TTGCCAGTATTAATAATATCTTTTATTATATTGGAGTGACTCATTTGCTTCCTAGGAATC	0.634208	0.567197	0.625014	0.65579	0.635279	0.432725	0.292103	0.240269	0.377344	0.39034	0.569086	0.637372	0.674541	0.605514	0.22764	0.831425	0.839453	0.769672	0.807254	0.821032	0.823883	0.862482	0.746763	0.848077
cg00326231	CLTCL1	ATCTAGGGCTAACAGTGCTCTGCACTGTGAAAATAGGAACTTTCAAGCAAGCACGTTCCT[CG]ATGTACTACTTTGTGGTCAAAAAGACTTGAGTCTGAATCCTGTTCTTATTGAATGAAGAT	0.511837	0.293801	0.365942	0.406306	0.469039	0.106706	0.133847	0.0915445	0.165698	0.407393	0.275566	0.395095	0.396663	0.312503	0.68338	0.770811	0.766124	0.776173	0.786817	0.798699	0.774067	0.75139	0.70208	0.695752
cg11212589	ZPBP2	ATAACATTTTTCATTAAAGTTAATAGTTTTATGTATTTTTGTGAGGACTAACTGATAAAA[CG]TTATGTTTCTATGCTGACTGCAAGATTGATGGGATTTAGTATTACATAGTATTTGAAAAT	0.472121	0.431732	0.443043	0.541494	0.417399	0.119209	0.143593	0.277387	0.271949	0.314606	NA	0.473927	0.561129	0.363044	0.131087	0.72431	0.663976	0.703245	0.716347	0.691345	0.647327	0.647363	0.621386	0.685756
cg06780861		ACAGGACAAAGTCCCCTTTTCTCTTCCCTCTGCTTTTCTCAAGCAGAATGAATGTCTCTT[CG]TAGTGACCATGGCTGGGAATGTTCTGGGTCACACCTAAAGCCAGCACATCTCAGGATCTC	0.489387	0.381737	0.526792	0.417417	0.337406	0.143271	0.206513	0.15621	0.191763	0.116892	0.475617	0.507008	0.456136	0.415968	0.113226	0.733941	0.73861	0.728641	0.73566	0.733236	0.73468	0.731411	0.672198	0.741976
cg19827875	NAV1	AGCACTCGCTCTTCCAGGCCAAGGGCAGCCCGGCGGGCGGCGCCAAGACCCCCCTGGCTC[CG]CTCGCGCCCAACCTGGGAAAGCCGAGCCGGATCCCTCGAGGACCCTATGCGGAGGTCAAG	0.354818	0.264351	0.422201	0.38024	0.207732	0.0358345	0.0696346	0.0412757	0.0143563	0.020038	0.318779	0.408499	0.370754	0.264199	0.0279367	0.0130678	0.0159228	0.0218163	0.0218431	0.020335	0.0129942	0.0242814	0.0201268	0.0188538
cg06379532	TRIM71	ACTTACCAGGCTGGAACCCTTACGGGCTCATGACCACGCCTTTTCTTTCTGGAACTGCCA[CG]GACATTTTTGGGTTTCATGTACTCTCAGGATGAATTCTCCACCACCACCCCGAGAGGAAA	0.468928	0.291014	0.46837	0.54555	0.346782	0.120019	0.173717	0.194484	0.163883	0.302145	0.360063	0.484763	0.517966	0.323817	0.540782	0.779508	0.819893	0.833458	0.801783	0.789822	0.78	0.782615	0.792347	0.770679
cg08234149		CCACCCACTTCCAAACAGATGAATTAGACTGACAGGGAGCAAATAGGTAGCAAGGTTTTT[CG]TAATGATGCCTGTGGTAGTGCTTTGACAGCACAACTCTTCTTTGGAAAGGGAACACAACT	0.634628	0.628223	0.697195	0.657299	0.672041	0.463091	0.409914	0.322448	0.555436	0.288702	0.685923	0.685749	0.684044	0.729516	0.401005	0.803929	0.807516	0.809126	0.814083	0.801319	0.77988	0.780636	0.749866	0.770556
cg11015768	ST3GAL5	ATGTATGAATGGGTCCTCGAAGAATGACTAAGACTCTGGAGACAGGACAGAGAGAGGAGG[CG]GCATTCCAGACAGAAGGAAGGTAATGCCAAGACACACAGAGAGAGGTGTGTGCTCGGGCC	0.588689	0.451981	0.578037	0.525892	0.459586	0.319337	0.135186	0.253638	0.314826	0.212157	0.439425	0.625977	0.550895	0.454931	0.317615	0.777131	0.767194	0.780598	0.768604	0.781071	0.754313	0.791726	0.719218	0.776694
cg09635036	VAT1L	TTTAAGGATTTAACGAAGCACCTTAGTACAGTATCTGCCCCATGGTGGGACAAAAGAAGC[CG]CAGCTGCTATTAATGCTGTATTGTTAGCCAAAGGGAAGAGAAGGGCAGATGTGGTGCAGA	0.608955	0.564448	0.67277	0.643273	0.638411	0.34971	0.462917	0.376726	0.443898	0.195161	0.615069	0.693012	0.696004	0.633641	0.427285	0.336023	0.325013	0.330687	0.30812	0.369624	0.349218	0.435218	0.484913	0.381825
cg03882967		GTTGGAGCTCAAGTCATGCTTTATTTCGGGGTTCCTTGGCCAATGGCTAAGGCAGTGACA[CG]AAGCCAGTAAGACAAGTCGCAAGTAGGCCTCCTCTAATATGCAATCTTTGCTCCAGAGCT	0.572056	0.560309	0.644006	0.646633	0.5917	0.225234	0.33923	0.39497	0.433038	0.290723	0.596422	0.642027	0.658529	0.622842	0.314887	0.780434	0.761234	0.817172	0.784392	0.766984	0.73546	0.750545	0.772524	0.734747
cg07843512		GACATTCAAGGAAGCCAAACCTAAAGTTGTGAAGAGAACAATCTAGGGTCACACAGAAAC[CG]TGTCTGAGACTTCTAGCCTAGCATTTTTTTTTCTTTCTCTCTTGTTTATTTTCATGCAGC	0.436452	0.407468	0.443822	0.405948	0.351485	0.234648	0.202437	0.141867	0.145048	0.319047	0.494597	0.430237	0.42006	0.405652	0.30059	0.626232	0.621171	0.563452	0.558306	0.612093	0.57612	0.666641	0.551445	0.587822
cg10328538		GTGGAATTAGTGCCCTTTATAAAAGAAACCCTAGAAAGTTTTTCTGCCCTCTGTTCAACA[CG]TGAGAGTAAAACAAGAGGACTGGAGCCTGCAACTCGAAGAGGGCCCTCACCAGAATCTGA	0.532359	0.468923	0.479403	0.59524	0.448693	0.106567	0.348932	0.163066	0.148692	0.104665	0.47576	0.488124	0.630272	0.439265	0.147155	0.792498	0.817296	0.828913	0.811969	0.789899	0.740193	0.697319	0.719092	0.722769
cg18004235		TGACTGGGAAAGAGAAGAAAGGGTCCTGCCATGCCTCTCCTGTGAGCCAACAGTCTGATG[CG]CACTTCAGGGTCACTGTTTCCAGTGTGCAAGTCCTTGGCTGTTGGAATGAAATGTCTGCC	0.570171	0.498715	0.413552	0.330387	0.299196	0.127132	0.179653	0.0688971	0.0865895	0.0746287	0.315169	0.314042	0.225392	0.287883	0.0737103	0.874685	0.86836	0.865417	0.869884	0.881705	0.861853	0.875968	0.768347	0.877758
cg13385601		TTAGCATTAAAAAGAAAAAAAGCAAGCAAGCAAACTTTTCTGTGAGCCATGGTTCTATAC[CG]TTCACTAGAAATATAAAGGGTTCCTGGGATGTGCATGGAGGCTGGCTCGGGTTCCCCTCC	0.54278	0.450893	0.560812	0.58205	0.343181	0.150758	0.273163	0.137483	0.199454	0.636086	0.469433	0.592747	0.621796	0.410872	0.707311	0.881058	0.859058	0.82238	0.850941	0.844935	0.82285	0.848202	0.812722	0.871149
cg04568774	CHST4	AATAACTCTAATTCAGCTCAAATAGATTCAGATAGTTTATTACCTACACAGATACAAGGT[CG]ACATTGGATCAACTCCCCATGGCCTTGGTCCCATGGGATGACACCAAATCAGAAGGATTT	0.630171	0.505212	0.564193	0.608383	0.569376	0.394559	0.388206	0.174125	0.279987	0.296182	0.546874	0.582603	0.611827	0.59814	0.143846	0.772398	0.797424	0.799022	0.775368	0.796412	0.777903	0.781105	0.723196	0.796733
[truncated: 1,000 more rows]
